# Supplementary material for: RBM17 Mediates Evasion of Pro-Leukemic Factors from Splicing-coupled NMD to Enforce Leukemic Stem Cell Maintenance
Source: Research Square preprint supplement (doi:10.21203/rs.3.rs-728533/v1), 2021-07-27
Supplement: Supplementary file 1 [file 0df8379cb2357cb225d0cd6c.xlsx]

## Sheet: EIF4A2_KD_D5_K562
Checked	Protein FDR Confidence: Combined	Master	Accession	Description	Exp. q-value: Combined	Contaminant	Sum PEP Score	Coverage [%]	# Peptides	# PSMs	# Unique Peptides	# Protein Groups	# AAs	MW [kDa]	calc. pI	Score Sequest HT: Sequest HT	# Peptides (by Search Engine): Sequest HT	# Razor Peptides	Abundances (Grouped): F1, 126	Abundances (Grouped): F1, 127	Abundances (Grouped): F1, 128	Abundances (Grouped): F1, 129	Abundances (Grouped): F1, 130	Abundances (Grouped): F1, 131	Modifications	shscramble_rep1	shscramble_rep2	shEIF4A2#1_rep1	shEIF4A2#1_rep2	shEIF4A2#2_rep1	shEIF4A2#2_rep2	Avg_shscramble	Avg_shEIF4A2#1	FC_shEIF4A2#1	Avg_shEIF4A2#2	FC_shEIF4A2#2	SigB_shEIF4A2#1	SigB_shEIF4A2#2	Direction
FALSE	High	Master Protein	Q14204	Cytoplasmic dynein 1 heavy chain 1 [OS=Homo sapiens]	0	FALSE	2371.35	55	245	1186	245	1	4646	532.1	6.4	4219.28	245	0	144851	134586	161877	158918	140298	131732		144851	144985	156461	155196	159159	154857	144918	155829	1.07529	157008	1.08343	0.570119	0.719615	TRUE
FALSE	High	Master Protein	Q09666-1	Neuroblast differentiation-associated protein AHNAK [OS=Homo sapiens]	0	FALSE	2348.67	73	264	1089	263	1	5890	628.7	6.15	3383.16	264	1	145567	132696	127642	129313	154897	145281		145567	142948	123372	126285	175721	170784	144257	124828	0.865316	173252	1.201	0.187608	0.266463	FALSE
FALSE	High	Master Protein	P78527	DNA-dependent protein kinase catalytic subunit [OS=Homo sapiens]	0	FALSE	1826.61	50	221	1122	220	1	4128	468.8	7.12	3727.47	221	1	149581	134176	145893	139918	125621	117300		149581	144542	141012	136641	142509	137892	147062	138826	0.944	140201	0.953345	0.605344	0.450584	TRUE
FALSE	High	Master Protein	Q9Y490	Talin-1 [OS=Homo sapiens]	0	FALSE	1766.36	69	152	1136	130	1	2541	269.6	6.07	4429.19	152	23	108025	99271.1	141851	139985	90953.7	86857.4		108025	106941	137105	136707	103181	102105	107483	136906	1.27375	102643	0.95497	0.0491321	0.460594	FALSE
FALSE	High	Master Protein	P21333	Filamin-A [OS=Homo sapiens]	0	FALSE	1434.57	66	142	862	126	1	2647	280.6	6.06	3330.2	142	16	96720.9	88264.6	114772	112408	69580.8	66543.6		96720.9	95084	110932	109776	78935.2	78224.9	95902.5	110354	1.15069	78580	0.819374	0.271496	0.0339469	FALSE
FALSE	High	Master Protein	Q15149-1	plectin [OS=Homo sapiens]	0	FALSE	1434.12	46	199	545	190	1	4684	531.5	5.96	2115.58	199	8	63876.8	57627.8	58278.2	57524.6	69314.7	66481.5		63876.8	62080.2	56328.4	56177.5	78633.3	78151.9	62978.5	56252.9	0.893209	78392.6	1.24475	0.301248	0.164159	FALSE
FALSE	High	Master Protein	P49327	Fatty acid synthase [OS=Homo sapiens]	0	FALSE	1369.46	60	127	1025	125	1	2511	273.3	6.44	3520.43	127	2	106413	99912.4	86692.9	85302.8	149503	140423		106413	107632	83792.5	83305.1	169603	165073	107022	83548.8	0.780667	167338	1.56358	0.0293043	0.000600819	FALSE
FALSE	High	Master Protein	P35579-1	Myosin-9 [OS=Homo sapiens]	0	FALSE	1356.73	63	141	608	116	1	1960	226.4	5.6	2267.57	141	26	89087.8	80094.7	76073.6	74074.6	99824.6	92679.2		89087.8	86282.9	73528.4	72339.9	113245	108948	87685.4	72934.2	0.831771	111097	1.26699	0.0970843	0.125146	FALSE
FALSE	High	Master Protein	Q9UPN3	Microtubule-actin cross-linking factor 1, isoforms 1/2/3/5 [OS=Homo sapiens]	0	FALSE	1351.68	31	202	454	48	1	7388	837.8	5.39	1626.68	202	156	52527.1	48311.1	49835	48320.4	50508.3	47687.3		52527.1	52043.7	48167.7	47188.8	57298.6	56058.5	52285.4	47678.3	0.911885	56678.5	1.08402	0.398867	0.716761	FALSE
FALSE	High	Master Protein	Q00610-1	Clathrin heavy chain 1 [OS=Homo sapiens]	0	FALSE	1224.99	63	100	729	76	1	1675	191.5	5.69	2836.59	100	30	88970.7	82614.9	69969.9	68264.6	87460.4	83690.9		88970.7	88997.8	67629	66666	99218.5	98382.2	88984.3	67147.5	0.754599	98800.4	1.11031	0.0144963	0.595411	FALSE
FALSE	High	Master Protein	Q5T4S7-4	Isoform 4 of E3 ubiquitin-protein ligase UBR4 [OS=Homo sapiens]	0	FALSE	1211.79	36	161	550	1	1	5176	573.2	6.05	2012.74	161	169	67090.9	61854.3	67332.6	66439.6	67700.5	62717.6		67090.9	66633.2	65079.9	64883.7	76802.1	73727.2	66862.1	64981.8	0.971878	75264.7	1.12567	0.8158	0.529167	FALSE
FALSE	High	Master Protein	Q5T4S7-1	e3 ubiquitin-protein ligase UBR4 [OS=Homo sapiens]	0	FALSE	1210.19	36	161	549	1	1	5183	573.5	6.04	2013.9	161	0	784.6	702	800.2	800.3	836.2	738.7		784.6	756.237	773.428	781.558	948.618	868.374	770.419	777.493	1.00918	908.496	1.17922	0.987345	0.305602	TRUE
FALSE	High	Master Protein	P07814	Bifunctional glutamate/proline--tRNA ligase [OS=Homo sapiens]	0	FALSE	1209.68	70	103	766	102	1	1512	170.5	7.33	2755.76	103	0	98101.4	90545.2	97836	97718.5	79642.8	75517.5		98101.4	97540.8	94562.7	95430.1	90349.9	88774.1	97821.1	94996.4	0.971124	89562	0.915569	0.809842	0.254415	TRUE
FALSE	High	Master Protein	Q92616	eIF-2-alpha kinase activator GCN1 [OS=Homo sapiens]	0	FALSE	1207.81	55	138	660	137	1	2671	292.6	7.47	2275.36	138	2	79647.8	73835.7	61521.4	60565	81465.6	75670		79647.8	79540.3	59463.1	59146.7	92417.8	88953.3	79594.1	59304.9	0.745092	90685.6	1.13935	0.0110377	0.473492	FALSE
FALSE	High	Master Protein	Q9UPN3-5	Isoform 4 of Microtubule-actin cross-linking factor 1, isoforms 1/2/3/5 [OS=Homo sapiens]	0	FALSE	1137.55	31	158	384	4	1	5938	669.7	5.3	1388.23	158	1	1803.9	1713.1	1745.8	1665.7	1773.2	1680.6		1803.9	1845.46	1687.39	1626.69	2011.59	1975.62	1824.68	1657.04	0.908128	1993.6	1.09258	0.546176	0.440964	FALSE
FALSE	High	Master Protein	P49792	E3 SUMO-protein ligase RanBP2 [OS=Homo sapiens]	0	FALSE	1118.16	48	131	561	81	1	3224	358	6.2	2006.49	131	50	68544.9	62895.5	59226.7	59245.4	70930.4	68969		68544.9	67754.9	57245.2	57858	80466.2	81076	68149.9	57551.6	0.844485	80771.1	1.1852	0.126082	0.312416	FALSE
FALSE	High	Master Protein	P35580	Myosin-10 [OS=Homo sapiens]	0	FALSE	1099.82	57	134	505	109	1	1976	228.9	5.54	1810.43	134	4	68786.6	61239	51439.3	51028.3	50347.5	47528.4		68786.6	65970.4	49718.3	49833.3	57116.2	55871.7	67378.5	49775.8	0.738749	56493.9	0.838456	0.00915885	0.0540918	TRUE
FALSE	High	Master Protein	Q14315	Filamin-C [OS=Homo sapiens]	0	FALSE	1066.25	55	119	831	100	1	2725	290.8	5.97	2802.65	119	1	70239.7	64886.4	61281.4	60031.5	66827	63366.1		70239.7	69899.6	59231.1	58625.7	75811.2	74489.6	70069.7	58928.4	0.840997	75150.4	1.07251	0.117527	0.772485	FALSE
FALSE	High	Master Protein	O75369-8	Isoform 8 of Filamin-B [OS=Homo sapiens]	0	FALSE	1061.19	61	124	517	110	1	2633	281.5	5.71	1821.43	124	3	54991.4	50417	59178.1	58356.8	49358	46845.7		54991.4	54312.3	57198.2	56990.2	55993.7	55069.1	54651.8	57094.2	1.04469	55531.4	1.01609	0.72477	0.908824	TRUE
FALSE	High	Master Protein	O75643-1	U5 small nuclear ribonucleoprotein 200 kDa helicase [OS=Homo sapiens]	0	FALSE	1032.61	51	108	513	108	1	2136	244.4	6.06	1838.45	108	0	59081.1	54240.1	60728.3	58720.5	52530.3	50795.7		59081.1	58430.8	58696.5	57345.4	59592.4	59712.5	58755.9	58021	0.987491	59652.5	1.01526	0.940993	0.902079	FALSE
FALSE	High	Master Protein	P07900-2	Isoform 2 of Heat shock protein HSP 90-alpha [OS=Homo sapiens]	0	FALSE	945.68	66	70	1718	42	1	854	98.1	5.16	6381.77	70	31	234720	231442	204627	200488	233815	226825		234720	249324	197781	195793	265249	266642	242022	196787	0.813096	265946	1.09885	0.0644208	0.647194	FALSE
FALSE	High	Master Protein	P27708	CAD protein [OS=Homo sapiens]	0	FALSE	934.78	54	93	619	88	1	2225	242.8	6.46	2233.91	93	5	56956.8	52573.8	52306.6	51859.8	50018.3	47637.3		56956.8	56635.7	50556.6	50645.3	56742.7	55999.7	56796.3	50601	0.890921	56371.2	0.992516	0.290489	0.722612	TRUE
FALSE	High	Master Protein	P34932	Heat shock 70 kDa protein 4 [OS=Homo sapiens]	0	FALSE	905.982	83	74	641	68	1	840	94.3	5.19	2532.45	74	8	80138	74369.9	83425.9	82328.2	80744.6	77717		80138	80115.8	80634.8	80400.2	91599.9	91359.7	80126.9	80517.5	1.00487	91479.8	1.14169	0.943151	0.46432	TRUE
FALSE	High	Master Protein	Q14008-3	Isoform 3 of Cytoskeleton-associated protein 5 [OS=Homo sapiens]	0	FALSE	901.902	50	105	546	104	1	2039	226.1	7.77	1780.08	105	1	59599	54502.2	68678.3	67454.9	56676.9	52886.7		59599	58713.1	66380.6	65875.2	64296.5	62170.6	59156.1	66127.9	1.11785	63233.5	1.06893	0.385357	0.79008	TRUE
FALSE	High	Master Protein	P08238	Heat shock protein HSP 90-beta [OS=Homo sapiens]	0	FALSE	884.19	77	68	1976	27	1	724	83.2	5.03	7210.53	68	18	118689	116173	109594	108623	108364	104992		118689	125148	105928	106079	122933	123422	121919	106003	0.869461	123178	1.01033	0.202133	0.862382	FALSE
FALSE	High	Master Protein	Q6P2Q9	Pre-mRNA-processing-splicing factor 8 [OS=Homo sapiens]	0	FALSE	881.192	48	110	483	110	1	2335	273.4	8.84	1579.05	110	0	61711.4	56006.7	63322.5	61940.8	53197	51445.4		61711.4	60333.8	61203.9	60490.2	60348.8	60476.3	61022.6	60847.1	0.997124	60412.5	0.990002	0.986716	0.703493	TRUE
FALSE	High	Master Protein	P12270	Nucleoprotein TPR [OS=Homo sapiens]	0	FALSE	876.891	45	105	308	103	1	2363	267.1	5.02	1199.48	105	2	46654.9	41123	45743.9	46006.1	38982.4	37985.8		46654.9	44300.2	44213.5	44928.7	44223.2	44653.9	45477.6	44571.1	0.980068	44438.6	0.977153	0.881092	0.608902	TRUE
FALSE	High	Master Protein	Q14980-2	Isoform 2 of Nuclear mitotic apparatus protein 1 [OS=Homo sapiens]	0	FALSE	833.073	54	99	303	2	1	2101	236.4	5.8	1230.12	99	103	33879.5	30847.2	37802.7	37358.4	30480.5	29967.9		33879.5	33230.5	36538	36483.5	34578.3	35228.6	33555	36510.7	1.08809	34903.4	1.04019	0.510451	0.93441	TRUE
FALSE	High	Master Protein	Q14980-1	nuclear mitotic apparatus protein 1 [OS=Homo sapiens]	0	FALSE	824.198	54	98	304	1	1	2115	238.1	5.78	1241.43	98	0	495.5	495	632.5	633.5	408.4	398.4		495.5	533.244	611.339	618.664	463.305	468.336	514.372	615.002	1.19564	465.821	0.90561	0.481338	0.722145	FALSE
FALSE	High	Master Protein	P09874	Poly [ADP-ribose] polymerase 1 [OS=Homo sapiens]	0	FALSE	823.205	53	61	666	61	1	1014	113	8.88	2337.87	61	0	92204.9	84022.6	84163.8	85175.2	68172.1	66474.3		92204.9	90514.3	81348	83180.5	77337.1	78143.4	91359.6	82264.3	0.900445	77740.3	0.850926	0.337004	0.0720293	TRUE
FALSE	High	Master Protein	A6NHR9-1	structural maintenance of chromosomes flexible hinge domain-containing protein 1 [OS=Homo sapiens]	0	FALSE	797.707	48	99	444	98	1	2005	226.2	7.3	1482.65	99	1	52397.8	47302.2	55408	54891.7	37714.1	36627.3		52397.8	50956.8	53554.2	53606.2	42784.4	43057	51677.3	53580.2	1.03682	42920.7	0.830551	0.766758	0.0447797	FALSE
FALSE	High	Master Protein	P02549-1	spectrin alpha chain, erythrocytic 1 [OS=Homo sapiens]	0	FALSE	792.511	46	104	293	104	1	2419	279.8	5.05	1100.86	104	0	34313.5	32321.3	39145.9	39198.7	39537.2	38161.7		34313.5	34818.5	37836.2	38280.7	44852.6	44860.7	34566	38058.5	1.10104	44856.6	1.29771	0.453572	0.0836167	TRUE
FALSE	High	Master Protein	Q7Z6Z7	E3 ubiquitin-protein ligase HUWE1 [OS=Homo sapiens]	0	FALSE	789.912	31	114	323	114	1	4374	481.6	5.22	1117.99	114	0	36668	33397.2	39227.8	38831.1	30311.1	28631		36668	35977.5	37915.4	37921.7	34386.1	33657	36322.8	37918.6	1.04393	34021.5	0.936645	0.728768	0.355095	FALSE
FALSE	High	Master Protein	Q08211	Atp-dependent rna helicase a [OS=Homo sapiens]	0	FALSE	784.394	59	66	654	66	1	1270	140.9	6.84	2434.69	66	0	66200.3	60391.3	65962.1	65183.9	53752.4	53305.9		66200.3	65057.2	63755.2	63657.4	60978.8	62663.4	65628.8	63706.3	0.970707	61821.1	0.941982	0.806558	0.384122	TRUE
FALSE	High	Master Protein	P42704	Leucine-rich PPR motif-containing protein, mitochondrial [OS=Homo sapiens]	0	FALSE	778.167	65	87	444	87	1	1394	157.8	6.13	1498.66	87	0	64236	60175.3	51338.3	52306.9	56198.7	56165		64236	64824.5	49620.7	51082	63754	66024.4	64530.3	50351.3	0.780275	64889.2	1.00556	0.0290092	0.824374	FALSE
FALSE	High	Master Protein	P10809	60 kDa heat shock protein, mitochondrial [OS=Homo sapiens]	0	FALSE	775.309	82	54	748	54	1	573	61	5.87	2931.94	54	0	90055.4	87651.6	99532.3	101194	76587.3	77770.8		90055.4	94423.7	96202.3	98823.8	86883.7	91422.9	92239.5	97513.1	1.05717	89153.3	0.966541	0.659849	0.535343	FALSE
FALSE	High	Master Protein	Q9NU22	Midasin [OS=Homo sapiens]	0	FALSE	775.232	27	131	323	131	1	5596	632.4	5.68	1072.6	131	0	38453.3	35590.8	35299	34002	34389.4	32854.5		38453.3	38340.6	34118	33205.7	39012.7	38621.9	38396.9	33661.9	0.876681	38817.3	1.01095	0.229363	0.867364	FALSE
FALSE	High	Master Protein	P13639	Elongation factor 2 [OS=Homo sapiens]	0	FALSE	762.295	72	62	1119	61	1	858	95.3	6.83	3517.67	62	1	130924	123194	118569	118048	162496	153751		130924	132712	114602	115283	184342	180741	131818	114943	0.871982	182542	1.3848	0.21136	0.0221766	FALSE
FALSE	High	Master Protein	P46940	Ras GTPase-activating-like protein IQGAP1 [OS=Homo sapiens]	0	FALSE	753.591	51	82	344	77	1	1657	189.1	6.48	1321.72	82	7	44077.2	40529.4	41435.5	40562.5	43584.2	40322.7		44077.2	43660.8	40049.2	39612.6	49443.6	47401.1	43869	39830.9	0.907951	48422.3	1.10379	0.376865	0.624626	FALSE
FALSE	High	Master Protein	P46821	microtubule-associated protein 1B [OS=Homo sapiens]	0	FALSE	734.062	43	79	283	76	1	2468	270.5	4.81	1060.71	79	3	32984.8	30057	41652.7	42181.9	30242.2	28757.6		32984.8	32379.2	40259.1	41194.1	34307.9	33805.8	32682	40726.6	1.24615	34056.9	1.04207	0.0762604	0.924839	TRUE
FALSE	High	Master Protein	P11142-1	Heat shock cognate 71 kDa protein [OS=Homo sapiens]	0	FALSE	729.935	83	54	1609	36	1	646	70.9	5.52	5567.96	54	19	167945	162592	152483	152347	165400	162040		167945	175154	147381	148779	187637	190485	171549	148080	0.863194	189061	1.10208	0.180477	0.632421	FALSE
FALSE	High	Master Protein	O43707	Alpha-actinin-4 [OS=Homo sapiens]	0	FALSE	728.763	72	66	492	48	1	911	104.8	5.44	1919.13	66	19	69833.4	65242.4	77392.1	75142.3	66202.7	62877.6		69833.4	70283.1	74802.8	73382.6	75103	73915.3	70058.3	74092.7	1.05759	74509.1	1.06353	0.65773	0.816789	TRUE
FALSE	High	Master Protein	P31948-2	Isoform 2 of Stress-induced-phosphoprotein 1 [OS=Homo sapiens]	0	FALSE	702.318	62	58	648	58	1	590	68	7.74	1776.54	58	0	77037.8	70404.3	70044.3	71100	75840.1	72275.7		77037.8	75843.8	67700.9	69435	86036	84963.2	76440.8	68567.9	0.897007	85499.6	1.11851	0.319687	0.559596	FALSE
FALSE	High	Master Protein	Q01082-1	Spectrin beta chain, non-erythrocytic 1 [OS=Homo sapiens]	0	FALSE	700.334	45	90	237	9	1	2364	274.4	5.57	866.54	90	80	23761.9	21978.3	23241.5	22787.7	31796.8	30190.1		23761.9	23676.4	22463.9	22254	36071.5	35489.8	23719.1	22359	0.942656	35780.7	1.50851	0.595824	0.00207759	FALSE
FALSE	High	Master Protein	P53621-1	coatomer subunit alpha [OS=Homo sapiens]	0	FALSE	696.927	64	76	404	76	1	1224	138.3	7.66	1428.56	76	0	42564.2	38978.7	44951.5	44330.9	36938.4	34942.9		42564.2	41990.2	43447.6	43292.7	41904.4	41076.9	42277.2	43370.2	1.02585	41490.6	0.981394	0.826459	0.639504	FALSE
FALSE	High	Master Protein	P78371-1	T-complex protein 1 subunit beta [OS=Homo sapiens]	0	FALSE	683.558	88	49	856	49	1	535	57.5	6.46	3028.74	49	0	63619.4	59093.4	65211.8	64587.8	57912.5	55084		63619.4	63659	63030	63075.3	65698.2	64753.6	63639.2	63052.7	0.990783	65225.9	1.02493	0.967685	0.980549	FALSE
FALSE	High	Master Protein	P55072	Transitional endoplasmic reticulum ATPase [OS=Homo sapiens]	0	FALSE	681.814	76	59	601	58	1	806	89.3	5.26	2007.38	59	1	68919.2	62941.9	89105.9	89343.3	54299.6	52564.6		68919.2	67804.9	86124.7	87251	61599.6	61791.9	68362	86687.9	1.26807	61695.8	0.902486	0.0539278	0.202977	FALSE
FALSE	High	Master Protein	P14625	Endoplasmin [OS=Homo sapiens]	0	FALSE	677.402	61	60	676	48	1	803	92.4	4.84	2120.38	60	10	71756.7	66061.4	79068.3	77090.3	84450.9	79213.2		71756.7	71165.4	76423	75285	95804.4	93118.5	71461	75854	1.06147	94461.5	1.32186	0.638032	0.0594841	TRUE
FALSE	High	Master Protein	Q13085-4	Isoform 4 of Acetyl-CoA carboxylase 1 [OS=Homo sapiens]	0	FALSE	675.636	43	89	314	89	1	2383	269.8	6.52	1142.28	89	0	34691.7	32720.2	32441.8	31464.2	32906.8	31036.6		34691.7	35248.2	31356.4	30727.4	37330.8	36484.9	34970	31041.9	0.887673	36907.8	1.05542	0.275665	0.857353	FALSE
FALSE	High	Master Protein	P0DMV8	heat shock 70 kDa protein 1A [OS=Homo sapiens]	0	FALSE	674.258	72	45	912	28	1	641	70	5.66	3362.84	45	14	85268.8	81797	91000.8	91842.5	81706.8	81978.7		85268.8	88116.7	87956.2	89691.7	92691.4	96369.5	86692.8	88824	1.02458	94530.4	1.09041	0.833433	0.686473	TRUE
FALSE	High	Master Protein	Q99832	T-complex protein 1 subunit eta [OS=Homo sapiens]	0	FALSE	671.455	84	46	954	46	1	543	59.3	7.65	3852.34	46	0	78769	76424.6	83026.2	81552.8	72644.7	70549.8		78769	82329.3	80248.4	79643	82411	82934.3	80549.1	79945.7	0.992509	82672.7	1.02636	0.981693	0.992188	FALSE
FALSE	High	Master Protein	P18206	Vinculin [OS=Homo sapiens]	0	FALSE	670.551	66	69	523	69	1	1134	123.7	5.66	1728.43	69	0	63530	57997.5	78728	76812.4	45034.9	42755.5		63530	62478.5	76094	75013.6	51089.4	50260.9	63004.2	75553.8	1.19919	50675.1	0.804313	0.149406	0.0229481	FALSE
FALSE	High	Master Protein	P35658-3	Isoform 3 of Nuclear pore complex protein Nup214 [OS=Homo sapiens]	0	FALSE	660.494	40	59	353	59	1	2091	213.6	7.47	1407.97	59	0	31979.6	29376.9	29662.1	29021.5	30947.8	29554.5		31979.6	31646.6	28669.7	28341.9	35108.4	34742.6	31813.1	28505.8	0.896039	34925.5	1.09783	0.314923	0.651872	FALSE
FALSE	High	Master Protein	P68104	Elongation factor 1-alpha 1 [OS=Homo sapiens]	0	FALSE	656.095	77	33	2496	20	1	462	50.1	9.01	10062.2	33	15	171968	164751	161167	160917	179810	175920		171968	177480	155775	157149	203984	206801	174724	156462	0.89548	205393	1.17553	0.31219	0.342988	FALSE
FALSE	High	Master Protein	P11388-4	Isoform 4 of DNA topoisomerase 2-alpha [OS=Homo sapiens]	0	FALSE	653.412	45	82	349	64	1	1612	182.6	8.63	1158.24	82	20	66683.5	58830.7	68877.8	65221.3	44004.8	41522.6		66683.5	63376	66573.4	63693.9	49920.8	48811.6	65029.8	65133.7	1.0016	49366.2	0.759132	0.961557	0.00623683	FALSE
FALSE	High	Master Protein	Q14839-2	Isoform 2 of Chromodomain-helicase-DNA-binding protein 4 [OS=Homo sapiens]	0	FALSE	649.488	46	81	317	67	1	1940	220.7	5.97	1043.43	81	18	39805.9	35730.4	38077.4	37726.3	33565.8	32574.5		39805.9	38491	36803.5	36842.8	38078.4	38292.7	39148.4	36823.1	0.940603	38185.5	0.975404	0.581418	0.59647	TRUE
FALSE	High	Master Protein	P48643	T-complex protein 1 subunit epsilon [OS=Homo sapiens]	0	FALSE	647.975	81	47	658	46	1	541	59.6	5.66	2202.45	47	1	85080.1	80045.9	87249.6	86922.5	76300.5	73217.8		85080.1	86230.3	84330.5	84886.9	86558.3	86070.7	85655.2	84608.7	0.987782	86314.5	1.0077	0.943354	0.841358	FALSE
FALSE	High	Master Protein	P58107	epiplakin [OS=Homo sapiens]	0	FALSE	646.596	51	79	264	73	1	5090	555.3	5.6	998.53	79	0	24494.6	22829.3	18597	18378.2	23399.3	22605.8		24494.6	24593.1	17974.8	17947.8	26545.1	26574.1	24543.9	17961.3	0.731805	26559.6	1.08213	0.00775123	0.725839	FALSE
FALSE	High	Master Protein	P07437	tubulin beta chain [OS=Homo sapiens]	0	FALSE	646.035	85	35	1504	6	1	444	49.6	4.89	4801.03	35	44	154381	151831	156639	153126	136656	134093		154381	163562	151399	149541	155028	157632	158971	150470	0.946519	156330	0.983384	0.623362	0.654077	TRUE
FALSE	High	Master Protein	P49368-1	T-complex protein 1 subunit gamma [OS=Homo sapiens]	0	FALSE	644.535	71	48	587	48	1	545	60.5	6.49	2001.12	48	0	71766.1	67522.4	74889.8	73480.2	64853.2	61693.8	Acetyl [N-Term]	71766.1	72739.3	72384.2	71759.4	73572	72523.7	72252.7	72071.8	0.997497	73047.9	1.01101	0.984616	0.867833	FALSE
FALSE	High	Master Protein	P06733-1	alpha-enolase [OS=Homo sapiens]	0	FALSE	638.312	82	39	1558	34	1	434	47.1	7.39	5765.95	39	5	198735	192135	120803	120092	194147	187323		198735	206980	116762	117280	220248	220207	202857	117021	0.576862	220227	1.08563	2.10003e-05	0.709106	FALSE
FALSE	High	Master Protein	P00558	phosphoglycerate kinase 1 [OS=Homo sapiens]	0	FALSE	636.6	85	40	992	33	1	417	44.6	8.1	3719.66	40	8	96973.2	94206	115692	116698	86581.8	84298.6		96973.2	101484	111821	113965	98221.8	99096.6	99228.8	112893	1.1377	98659.2	0.994259	0.31344	0.735972	FALSE
FALSE	High	Master Protein	P68371	Tubulin beta-4B chain [OS=Homo sapiens]	0	FALSE	632.869	84	34	1484	1	1	445	49.8	4.89	4693.5	34	7	18808.8	18585.7	25464.1	24848.2	20182.9	19591.3		18808.8	20021.7	24612.2	24266.3	22896.3	23030.4	19415.2	24439.2	1.25877	22963.3	1.18275	0.0626314	0.319981	TRUE
FALSE	High	Master Protein	P26640	Valine--tRNA ligase [OS=Homo sapiens]	0	FALSE	630.959	58	71	389	71	1	1264	140.4	7.59	1328.75	71	0	47501.5	43938.7	47640.5	47279.6	54595.9	51745.7		47501.5	47333.5	46046.6	46172.4	61935.7	60829.3	47417.5	46109.5	0.972416	61382.5	1.29451	0.820051	0.0873369	FALSE
FALSE	High	Master Protein	O75533-1	splicing factor 3B subunit 1 [OS=Homo sapiens]	0	FALSE	629.321	58	65	277	65	1	1304	145.7	7.09	976.29	65	0	33307.3	30311.5	33579	32921.6	29705.2	28683.7		33307.3	32653.4	32455.6	32150.6	33698.8	33718.9	32980.4	32303.1	0.979465	33708.8	1.02209	0.876251	0.957424	FALSE
FALSE	High	Master Protein	P14618	Pyruvate kinase PKM [OS=Homo sapiens]	0	FALSE	625.086	71	41	468	5	1	531	57.9	7.84	1853.56	41	46	70592.9	67474	74654.1	74004.3	66547.3	63841.5		70592.9	72687.1	72156.4	72271.2	75493.9	75048.4	71640	72213.8	1.00801	75271.2	1.05069	0.925569	0.88117	TRUE
FALSE	High	Master Protein	O60610-1	Protein diaphanous homolog 1 [OS=Homo sapiens]	0	FALSE	623.474	47	63	416	61	1	1272	141.3	5.41	1384.97	63	2	48835	44367.1	53981.6	52563.3	40784.4	38281.2		48835	47795	52175.6	51332.4	46267.4	45001.2	48315	51754	1.07118	45634.3	0.944517	0.589958	0.398403	FALSE
FALSE	High	Master Protein	Q01082-3	Isoform 2 of Spectrin beta chain, non-erythrocytic 1 [OS=Homo sapiens]	0	FALSE	620.385	45	82	220	1	1	2155	251.2	5.53	805.08	82	0	154.3	144.5	151.5	140.4	176.5	160.7		154.3	155.664	146.431	137.112	200.229	188.91	154.982	141.772	0.914762	194.569	1.25543	0.630853	0.159644	FALSE
FALSE	High	Master Protein	Q5VYK3	Proteasome-associated protein ECM29 homolog [OS=Homo sapiens]	0	FALSE	619.688	45	68	275	68	1	1845	204.2	7.12	966.01	68	0	30768.2	28435	29777.5	29269.9	28525.1	26591.4		30768.2	30631.9	28781.2	28584.4	32360	31259.3	30700.1	28682.8	0.934293	31809.7	1.03614	0.538193	0.954996	FALSE
FALSE	High	Master Protein	P04406-1	glyceraldehyde-3-phosphate dehydrogenase [OS=Homo sapiens]	0	FALSE	619.01	81	28	1700	4	1	335	36	8.46	5688.71	28	35	117143	115509	132034	130801	121136	117373		117143	124433	127617	127738	137422	137977	120788	127677	1.05704	137699	1.14001	0.660547	0.470905	TRUE
FALSE	High	Master Protein	P51610-4	Isoform 4 of Host cell factor 1 [OS=Homo sapiens]	0	FALSE	617.61	39	56	340	56	1	2079	213.3	7.33	1281.94	56	0	30618.1	27435.6	32293.5	32253.8	25925.8	25318.9		30618.1	29555.3	31213.1	31498.5	29411.3	29763.5	30086.7	31355.8	1.04218	29587.4	0.983403	0.73808	0.654219	FALSE
FALSE	High	Master Protein	Q00839	Heterogeneous nuclear ribonucleoprotein U [OS=Homo sapiens]	0	FALSE	617.406	55	52	929	51	1	825	90.5	6	2894.25	52	1	92312	84456.8	95790.3	96959	75457.4	75575.4		92312	90982	92585.5	94688.4	85601.9	88842.1	91647	93636.9	1.02171	87222	0.951717	0.849265	0.440676	FALSE
FALSE	High	Master Protein	P04406-2	Isoform 2 of Glyceraldehyde-3-phosphate dehydrogenase [OS=Homo sapiens]	0	FALSE	609.094	82	25	1664	1	1	293	31.5	7.61	5603.35	25	0	64.1	82.6	73.7	71.8	71.5	74.2		64.1	88.9818	71.2343	70.1186	81.1124	87.2253	76.5409	70.6764	0.923381	84.1689	1.09966	0.679337	0.53673	FALSE
FALSE	High	Master Protein	P22102-1	trifunctional purine biosynthetic protein adenosine-3 [OS=Homo sapiens]	0	FALSE	602.278	66	54	457	54	1	1010	107.7	6.7	1601.76	54	0	64561.2	58227.9	54610.1	55140.2	41812	40225.7		64561.2	62726.7	52783	53848.9	47433.2	47287	63643.9	53316	0.837723	47360.1	0.744142	0.109915	0.00387776	TRUE
FALSE	High	Master Protein	Q16531	DNA damage-binding protein 1 [OS=Homo sapiens]	0	FALSE	596.338	53	55	356	55	1	1140	126.9	5.26	1326.93	55	0	43256.1	39891.1	47194.1	46556.1	37505.6	36031		43256.1	42973.1	45615.1	45465.8	42547.8	42356	43114.6	45540.5	1.05627	42451.9	0.984629	0.664484	0.663269	FALSE
FALSE	High	Master Protein	P11277	Spectrin beta chain, erythrocytic [OS=Homo sapiens]	0	FALSE	592.435	43	76	201	2	1	2137	246.3	5.27	745.67	76	68	19251.6	18167.7	22942.5	22721.9	25984	24975.1		19251.6	19571.4	22174.9	22189.8	29477.3	29359.3	19411.5	22182.4	1.14274	29418.3	1.51551	0.296674	0.00178609	TRUE
FALSE	High	Master Protein	P52272	Heterogeneous nuclear ribonucleoprotein M [OS=Homo sapiens]	0	FALSE	591.441	72	50	691	50	1	730	77.5	8.7	2460.73	50	0	73175.1	66728	73143.7	72955.6	59816.4	58453.8		73175.1	71883.5	70696.6	71247.1	67858.1	68714.9	72529.3	70971.8	0.978526	68286.5	0.941503	0.868727	0.381456	TRUE
FALSE	High	Master Protein	O00410-3	Isoform 3 of Importin-5 [OS=Homo sapiens]	0	FALSE	589.908	60	49	331	4	1	1115	125.5	4.92	1214.25	49	60	31805.6	29059.2	29932.4	29307.2	28356.6	26675.8		31805.6	31304.4	28931	28620.9	32168.8	31358.5	31555	28775.9	0.91193	31763.7	1.00661	0.399122	0.832736	FALSE
FALSE	High	Master Protein	P40939	Trifunctional enzyme subunit alpha, mitochondrial [OS=Homo sapiens]	0	FALSE	588.873	66	47	380	47	1	763	82.9	9.04	1314.92	47	0	48983.8	46063.6	52173.7	52684.6	43074.6	43344.7		48983.8	49622.5	50428.1	51450.8	48865.5	50953.6	49303.2	50939.5	1.03319	49909.5	1.0123	0.7864	0.878222	TRUE
FALSE	High	Master Protein	P11277-2	Isoform 2 of Spectrin beta chain, erythrocytic [OS=Homo sapiens]	0	FALSE	588.85	39	75	196	1	1	2328	267.7	5.39	733.98	75	0	69.6	67	144.9	145.4	77.8	77.3		69.6	72.1765	140.052	141.995	88.2594	90.8695	70.8883	141.024	1.98938	89.5644	1.26346	0.000347779	0.189421	TRUE
FALSE	High	Master Protein	P53396-1	ATP-citrate synthase [OS=Homo sapiens]	0	FALSE	588.583	57	59	566	2	1	1101	120.8	7.33	1837.61	59	65	59779.6	55150.6	65295.9	64144.8	64430.2	61266.7		59779.6	59411.6	63111.3	62642.6	73092.2	72021.6	59595.6	62877	1.05506	72556.9	1.21749	0.670667	0.223692	TRUE
FALSE	High	Master Protein	P53618	Coatomer subunit beta [OS=Homo sapiens]	0	FALSE	586.97	55	48	300	48	1	953	107.1	6.05	1177.51	48	0	32365.8	30049.7	33790.9	32816.5	27548.1	25834.4		32365.8	32371.4	32660.4	32048	31251.7	30369.4	32368.6	32354.2	0.999555	30810.5	0.951866	0.97304	0.441578	TRUE
FALSE	High	Master Protein	P16157-14	Isoform Er13 of Ankyrin-1 [OS=Homo sapiens]	0	FALSE	585.316	43	66	252	61	1	1983	217.3	6.3	946.28	66	6	26446.2	24761.8	19865.8	19466.9	27714.7	26740		26446.2	26674.9	19201.2	19011	31440.6	31434	26560.6	19106.1	0.71934	31437.3	1.18361	0.00532101	0.317311	FALSE
FALSE	High	Master Protein	Q9P2J5	Leucine--tRNA ligase, cytoplasmic [OS=Homo sapiens]	0	FALSE	580.866	60	71	377	71	1	1176	134.4	7.3	1298.05	71	0	49966.7	46005.9	51371.8	50816.1	35065.7	33708.1		49966.7	49560.4	49653.1	49626.1	39779.9	39625.3	49763.5	49639.6	0.997509	39702.6	0.797825	0.984548	0.0192599	TRUE
FALSE	High	Master Protein	P11717	Cation-independent mannose-6-phosphate receptor [OS=Homo sapiens]	0	FALSE	578.651	39	79	256	79	1	2491	274.2	5.94	968.55	79	0	28958.3	26715.8	27584.2	27322.1	32023.5	31010.5		28958.3	28779.9	26661.3	26682.3	36328.7	36454.2	28869.1	26671.8	0.923887	36391.4	1.26057	0.470621	0.13559	FALSE
FALSE	High	Master Protein	A5YKK6	CCR4-NOT transcription complex subunit 1 [OS=Homo sapiens]	0	FALSE	577.461	37	78	227	78	1	2376	266.8	7.11	789.52	78	0	28045.5	25973.7	29400.8	28939.6	23990.8	22742.3		28045.5	27980.5	28417.2	28261.9	27216.1	26734.5	28013	28339.5	1.01166	26975.3	0.962958	0.905165	0.511562	FALSE
FALSE	High	Master Protein	Q04637-9	Isoform 9 of Eukaryotic translation initiation factor 4 gamma 1 [OS=Homo sapiens]	0	FALSE	573.068	49	67	345	59	1	1606	176.1	5.34	1135.6	67	11	43775.1	39973.2	38002.5	37789.6	45656.9	42618.7		43775.1	43061.6	36731.1	36904.6	51795	50100.1	43418.3	36817.8	0.847979	50947.5	1.17341	0.135131	0.34992	FALSE
FALSE	High	Master Protein	Q92598	Heat shock protein 105 kDa [OS=Homo sapiens]	0	FALSE	564.801	63	51	358	46	1	858	96.8	5.39	1260.33	51	0	34995.7	32665.9	30304.7	29887.8	33924.4	32669.1		34995.7	35189.7	29290.8	29187.9	38485.2	38403.9	35092.7	29239.3	0.833203	38444.6	1.09551	0.100056	0.662605	FALSE
FALSE	High	Master Protein	P50395-1	Rab GDP dissociation inhibitor beta [OS=Homo sapiens]	0	FALSE	561.592	82	46	437	34	1	445	50.6	6.47	1554.05	46	14	54455.1	51676.4	64578	63028.5	56815.6	54105.3		54455.1	55669	62417.4	61552.5	64453.9	63603.1	55062	61985	1.12573	64028.5	1.16284	0.355694	0.385875	TRUE
FALSE	High	Master Protein	P53396-2	Isoform 2 of ATP-citrate synthase [OS=Homo sapiens]	0	FALSE	561.345	57	58	516	1	1	1091	119.7	7.33	1690.01	58	0	201.6	143.8	123.1	191.9	110.5	130.9		201.6	154.91	118.982	187.406	125.356	153.879	178.255	153.194	0.859408	139.617	0.783243	0.436702	0.428929	TRUE
FALSE	High	Master Protein	Q02880-2	Isoform Beta-1 of DNA topoisomerase 2-beta [OS=Homo sapiens]	0	FALSE	560.988	44	76	267	57	1	1621	182.5	8.06	869.44	76	1	22148.8	19952.4	24324.3	23039.9	11972.6	11532		22148.8	21493.9	23510.5	22500.3	13582.2	13556.4	21821.4	23005.4	1.05426	13569.3	0.621834	0.674784	0.00521207	FALSE
FALSE	High	Master Protein	O00410-2	Isoform 2 of Importin-5 [OS=Homo sapiens]	0	FALSE	560.927	63	46	319	1	1	1037	116.9	4.96	1173.52	46	0	281.2	242.8	400.8	353.7	222.4	192.4		281.2	261.559	387.391	345.417	252.299	226.174	271.38	366.404	1.35015	239.237	0.881558	0.145534	0.71488	FALSE
FALSE	High	Master Protein	P49790	Nuclear pore complex protein Nup153 [OS=Homo sapiens]	0	FALSE	557.31	49	55	255	55	1	1475	153.8	8.73	923.13	55	0	28128.1	25651.5	27736.6	27912.6	26608.4	26047.9		28128.1	27633.4	26808.6	27258.9	30185.6	30620.4	27880.7	27033.8	0.969622	30403	1.09047	0.798017	0.686194	FALSE
FALSE	High	Master Protein	O60841	Eukaryotic translation initiation factor 5B [OS=Homo sapiens]	0	FALSE	555.436	45	58	215	58	1	1220	138.7	5.49	865.81	58	0	39225	34792.1	36188.8	36515.8	35833.7	33975.2		39225	37480.2	34978	35660.7	40651.2	39939.3	38352.6	35319.4	0.920912	40295.2	1.05065	0.452196	0.881341	FALSE
FALSE	High	Master Protein	Q9Y5B9	FACT complex subunit SPT16 [OS=Homo sapiens]	0	FALSE	551.298	51	59	288	59	1	1047	119.8	5.66	977.95	59	0	40815.5	37058.3	39980.6	39526.8	30732.4	29493.8		40815.5	39921.5	38643	38601.1	34864	34671.2	40368.5	38622.1	0.956738	34767.6	0.861257	0.698706	0.0903458	TRUE
FALSE	High	Master Protein	Q71U36	tubulin alpha-1A chain [OS=Homo sapiens]	0	FALSE	550.974	84	35	1681	2	1	451	50.1	5.06	6112.49	35	5	37356.2	36774.7	41916.6	40096.9	35488.2	35058.3		37356.2	39616	40514.2	39157.9	40259.2	41212.5	38486.1	39836.1	1.03508	40735.9	1.05846	0.776178	0.842097	TRUE
FALSE	High	Master Protein	Q99460	26S proteasome non-ATPase regulatory subunit 1 [OS=Homo sapiens]	0	FALSE	549.566	53	44	379	44	1	953	105.8	5.39	1301.57	44	0	45968.7	41357.3	47185.7	47542.8	42277.7	40425.7		45968.7	44552.6	45607	46429.4	47961.5	47522.1	45260.7	46018.2	1.01674	47741.8	1.05482	0.876842	0.860346	TRUE
FALSE	High	Master Protein	O95071	E3 ubiquitin-protein ligase UBR5 [OS=Homo sapiens]	0	FALSE	548.266	30	71	263	70	1	2799	309.2	5.85	883.3	71	1	24703.9	23018.2	24518.2	23965	24235.2	22813		24703.9	24796.6	23697.9	23403.8	27493.4	26817.7	24750.3	23550.8	0.951539	27155.5	1.09718	0.659945	0.654885	FALSE
FALSE	High	Master Protein	P14618-2	Isoform M1 of Pyruvate kinase PKM [OS=Homo sapiens]	0	FALSE	547.479	64	38	392	2	1	531	58	7.71	1592.43	38	0	1667	1511.5	1731.5	1692.2	1112.6	1028		1667	1628.28	1673.57	1652.57	1262.18	1208.46	1647.64	1663.07	1.00937	1235.32	0.74975	0.999226	0.220099	FALSE
FALSE	High	Master Protein	P48634-1	Protein PRRC2A [OS=Homo sapiens]	0	FALSE	546.346	43	71	292	67	1	2157	228.7	9.45	944.46	71	0	24533.7	22153	23131.7	22878	20136.6	19042		24533.7	23864.6	22357.8	22342.2	22843.8	22384.7	24199.1	22350	0.923587	22614.2	0.934505	0.468744	0.343855	TRUE
FALSE	High	Master Protein	P04075	fructose-bisphosphate aldolase A [OS=Homo sapiens]	0	FALSE	543.307	92	38	1146	31	1	364	39.4	8.09	4738.43	38	7	75933.4	71975.6	85025.6	85798.3	76356	75776.9		75933.4	77536.5	82180.9	83789	86621.3	89079	76735	82985	1.08145	87850.1	1.14485	0.540981	0.452048	TRUE
FALSE	High	Master Protein	P04350	Tubulin beta-4A chain [OS=Homo sapiens]	0	FALSE	540.887	78	30	1378	2	1	444	49.6	4.88	4277.96	30	2	838.6	752.9	1389.3	1361.5	500.7	515.5		838.6	811.07	1342.82	1329.62	568.014	605.992	824.835	1336.22	1.61998	587.003	0.711661	0.00187011	0.171824	FALSE
FALSE	High	Master Protein	Q9BVA1	Tubulin beta-2B chain [OS=Homo sapiens]	0	FALSE	539.626	84	32	1155	1	1	445	49.9	4.89	3562.27	32	0	989.5	873.3	727.5	669.7	527.4	510.2		989.5	940.772	703.16	654.017	598.303	599.762	965.136	678.589	0.703101	599.033	0.620672	0.0560421	0.0667097	TRUE
FALSE	High	Master Protein	P41252	isoleucine--tRNA ligase, cytoplasmic [OS=Homo sapiens]	0	FALSE	538.664	55	64	260	64	1	1262	144.4	6.15	1000.02	64	0	41640	38064.1	40362.6	39305	23592.5	22644		41640	41005	39012.2	38384.5	26764.3	26619	41322.5	38698.4	0.936497	26691.6	0.645935	0.553105	0.000100462	TRUE
FALSE	High	Master Protein	P38646	Stress-70 protein, mitochondrial [OS=Homo sapiens]	0	FALSE	536.629	67	53	369	52	1	679	73.6	6.16	1350.18	53	0	49405.7	45356	47107.2	47661.1	40232.5	40142.2		49405.7	48860.3	45531.2	46545	45641.3	47188.9	49133	46038.1	0.937009	46415.1	0.944683	0.556602	0.399352	TRUE
FALSE	High	Master Protein	P17987	T-complex protein 1 subunit alpha [OS=Homo sapiens]	0	FALSE	534.186	81	38	559	38	1	556	60.3	6.11	1939.01	38	0	53977.2	50875.3	56678.4	55129	49659.2	47660.9		53977.2	54806	54782.1	53838	56335.4	56027.4	54391.6	54310.1	0.998501	56181.4	1.03291	0.978969	0.971506	FALSE
FALSE	High	Master Protein	P78559-2	Isoform 2 of Microtubule-associated protein 1A [OS=Homo sapiens]	0	FALSE	533.665	30	72	229	70	1	2805	305.5	4.92	750.11	72	0	30472.9	27421.1	20379.7	19986.1	24767.8	23118.1		30472.9	29539.7	19697.9	19518.1	28097.6	27176.3	30006.3	19608	0.653462	27636.9	0.921038	0.000574367	0.278402	TRUE
FALSE	High	Master Protein	Q92900	Regulator of nonsense transcripts 1 [OS=Homo sapiens]	0	FALSE	533.027	60	58	249	56	1	1129	124.3	6.61	925.9	58	2	32893.1	30600.7	32054.7	31746.7	29885.3	28544.4		32893.1	32964.9	30982.3	31003.2	33903.1	33555.2	32929	30992.8	0.941199	33729.1	1.0243	0.585581	0.975381	FALSE
FALSE	High	Master Protein	P11021	78 kDa glucose-regulated protein [OS=Homo sapiens]	0	FALSE	532.965	58	46	543	43	1	654	72.3	5.16	2119.28	46	0	61088.3	55939	65912.2	64730.8	74661.8	71591.9		61088.3	60260.9	63707	63214.9	84699.3	84159.3	60674.6	63461	1.04592	84429.3	1.39151	0.718256	0.0197926	TRUE
FALSE	High	Master Protein	Q9UQ35	serine/arginine repetitive matrix protein 2 [OS=Homo sapiens]	0	FALSE	531.541	22	45	389	45	1	2752	299.4	12.06	1333.19	45	0	26734.3	24878	27487.5	27326.1	26314.3	25959.8		26734.3	26800.1	26567.9	26686.2	29852	30516.9	26767.2	26627	0.994763	30184.4	1.12766	1	0.520851	FALSE
FALSE	High	Master Protein	Q13885	Tubulin beta-2A chain [OS=Homo sapiens]	0	FALSE	531.449	76	32	1162	2	1	445	49.9	4.89	3594.13	32	11	7263.9	6808.2	7561.8	7386.5	8696.7	8098.1		7263.9	7334.21	7308.81	7213.52	9865.88	9519.66	7299.06	7261.16	0.994809	9692.77	1.32795	0.881461	0.0835416	FALSE
FALSE	High	Master Protein	P13667	Protein disulfide-isomerase A4 [OS=Homo sapiens]	0	FALSE	525.745	58	48	377	47	1	645	72.9	5.07	1255.06	48	1	37390.5	34454.8	43996.6	43145.9	30106	28881.5		37390.5	37116.8	42524.6	42135.5	34153.4	33951.4	37253.7	42330.1	1.13627	34052.4	0.91407	0.318325	0.248097	FALSE
FALSE	High	Master Protein	Q86VP6-1	cullin-associated nedd8-dissociated protein 1 [OS=Homo sapiens]	0	FALSE	525.178	45	53	253	49	1	1230	136.3	5.78	993.25	53	4	38506.3	35652.9	41371.1	40342.6	32249.7	30314.2		38506.3	38407.5	39987	39397.8	36585.3	35635.6	38456.9	39692.4	1.03213	36110.5	0.938986	0.792165	0.367652	FALSE
FALSE	High	Master Protein	Q9BQE3	Tubulin alpha-1C chain [OS=Homo sapiens]	0	FALSE	525.033	84	35	1427	4	1	449	49.9	5.1	4855.04	35	37	145958	143712	147467	145170	129910	127039		145958	154816	142533	141770	147375	149340	150387	142152	0.945239	148357	0.986506	0.614178	0.677214	TRUE
FALSE	High	Master Protein	P26038	Moesin [OS=Homo sapiens]	0	FALSE	524.672	72	53	519	37	1	577	67.8	6.4	1570.08	53	21	62204.1	56724.9	65275.2	64952.9	61860.2	58063.3		62204.1	61107.5	63091.3	63431.8	70176.7	68255.9	61655.8	63261.6	1.02604	69216.3	1.12262	0.825405	0.542007	TRUE
FALSE	High	Master Protein	P22314	Ubiquitin-like modifier-activating enzyme 1 [OS=Homo sapiens]	0	FALSE	523.12	63	48	398	48	1	1058	117.8	5.76	1492.9	48	0	46626	42890	59774.1	58960.2	47087.4	45310.5		46626	46203.7	57774.3	57579.4	53417.8	53264.4	46414.9	57676.9	1.24264	53341.1	1.14922	0.080454	0.435397	TRUE
FALSE	High	Master Protein	P29144	Tripeptidyl-peptidase 2 [OS=Homo sapiens]	0	FALSE	522.229	45	56	262	56	1	1249	138.3	6.32	959.95	56	0	38106.5	34744.9	27779	27365.8	35015.1	33057.2		38106.5	37429.3	26849.6	26724.9	39722.5	38860.2	37767.9	26787.3	0.70926	39291.3	1.04034	0.0036579	0.933642	FALSE
FALSE	High	Master Protein	P63010-2	Isoform 2 of AP-2 complex subunit beta [OS=Homo sapiens]	0	FALSE	520.8	56	51	292	27	1	951	105.6	5.34	1025.14	51	26	37798	34736	34852.4	34874.6	38383.9	36679.1		37798	37419.7	33686.4	34057.9	43544.2	43117.9	37608.9	33872.1	0.900642	43331	1.15215	0.338015	0.424464	FALSE
FALSE	High	Master Protein	Q8WUM4	Programmed cell death 6-interacting protein [OS=Homo sapiens]	0	FALSE	520.287	66	54	561	54	1	868	96	6.52	1952.73	54	0	58533.4	54153.1	65872.5	65227.8	58738.3	55406.2		58533.4	58337	63668.6	63700.3	66635	65132.4	58435.2	63684.5	1.08983	65883.7	1.12747	0.502582	0.521676	TRUE
FALSE	High	Master Protein	P49588	Alanine--tRNA ligase, cytoplasmic [OS=Homo sapiens]	0	FALSE	519.233	62	53	334	53	1	968	106.7	5.53	1244.55	53	0	55653.9	51074.2	41538.5	41786.3	58805.9	56153.3		55653.9	55020.3	40148.8	40807.7	66711.7	66010.6	55337.1	40478.3	0.731485	66361.2	1.19922	0.00736198	0.27139	FALSE
FALSE	High	Master Protein	P27816-1	Microtubule-associated protein 4 [OS=Homo sapiens]	0	FALSE	519.176	52	55	250	25	1	1152	120.9	5.43	925.51	55	30	28054.8	25141.7	27377.7	27618.6	29558.2	27563.3		28054.8	27084.2	26461.7	26971.8	33532	32401.8	27569.5	26716.8	0.96907	32966.9	1.19578	0.793682	0.281103	FALSE
FALSE	High	Master Protein	Q14152	Eukaryotic translation initiation factor 3 subunit A [OS=Homo sapiens]	0	FALSE	517.487	48	76	366	76	1	1382	166.5	6.79	1166.58	76	0	39665.2	36040.9	37650.3	37135.2	45007.7	42147.7		39665.2	38825.5	36390.7	36265.6	51058.5	49546.4	39245.3	36328.1	0.925667	50302.5	1.28174	0.481835	0.103542	FALSE
FALSE	High	Master Protein	O14497	AT-rich interactive domain-containing protein 1A [OS=Homo sapiens]	0	FALSE	515.661	35	57	253	54	1	2285	241.9	6.7	994.52	57	3	22363.4	20431.8	24424.4	24119.1	20062.6	19432.4		22363.4	22010.4	23607.2	23554.3	22759.8	22843.6	22186.9	23580.8	1.06282	22801.7	1.02771	0.631242	0.998021	TRUE
FALSE	High	Master Protein	P12814-3	Isoform 3 of Alpha-actinin-1 [OS=Homo sapiens]	0	FALSE	515.121	59	51	243	33	1	914	105.5	5.41	890.28	51	0	16819.5	15834.8	22600.3	21942.4	18017.3	17085.4		16819.5	17058.2	21844.2	21428.5	20439.5	20084.6	16938.9	21636.4	1.27732	20262.1	1.19619	0.0462996	0.279923	TRUE
FALSE	High	Master Protein	P33993-1	DNA replication licensing factor MCM7 [OS=Homo sapiens]	0	FALSE	515.067	67	42	257	42	1	719	81.3	6.46	1039.46	42	0	32456	30177	29013.7	28196.7	21497.2	21038.7		32456	32508.5	28043	27536.4	24387.3	24731.9	32482.3	27789.7	0.855535	24559.6	0.756092	0.156407	0.00567373	TRUE
FALSE	High	Master Protein	Q9Y4A5	Transformation/transcription domain-associated protein [OS=Homo sapiens]	0	FALSE	514.814	27	97	211	97	1	3859	437.3	8.19	663.95	97	0	21435.6	19757.4	25016.2	24282.3	18299.5	18134.8		21435.6	21283.9	24179.2	23713.6	20759.7	21318.2	21359.7	23946.4	1.1211	21039	0.984982	0.372947	0.665881	FALSE
FALSE	High	Master Protein	O95757	Heat shock 70 kDa protein 4L [OS=Homo sapiens]	0	FALSE	514.718	66	55	325	48	1	839	94.5	5.88	1108.38	55	2	27244.3	24754.2	29557.7	29616.6	30769.8	29350.3		27244.3	26666.7	28568.8	28923	34906.5	34502.5	26955.5	28745.9	1.06642	34704.5	1.28747	0.613318	0.0959978	TRUE
FALSE	High	Master Protein	P50851-1	Lipopolysaccharide-responsive and beige-like anchor protein [OS=Homo sapiens]	0	FALSE	514.086	30	73	270	73	1	2863	318.9	5.6	865.56	73	0	28577	26230.8	33276.8	32506.6	25267	23769.9		28577	28257.4	32163.5	31745.3	28663.9	27942.5	28417.2	31954.4	1.12447	28303.2	0.995988	0.360325	0.7493	FALSE
FALSE	High	Master Protein	Q13200	26S proteasome non-ATPase regulatory subunit 2 [OS=Homo sapiens]	0	FALSE	513.246	66	50	336	50	1	908	100.1	5.2	1059.98	50	0	36593.3	33005.7	35554.7	35260	34276.8	32245.3		36593.3	35555.8	34365.2	34434.3	38885	37905.7	36074.5	34399.7	0.953573	38395.3	1.06433	0.67501	0.812802	FALSE
FALSE	High	Master Protein	Q9UQE7	Structural maintenance of chromosomes protein 3 [OS=Homo sapiens]	0	FALSE	508.984	45	64	209	61	1	1217	141.5	7.18	738.46	64	3	33850.8	31333.2	35586.7	34941.3	25197.1	24513.2		33850.8	33754	34396.1	34123	28584.6	28816.3	33802.4	34259.6	1.01352	28700.5	0.849065	0.894741	0.0690775	FALSE
FALSE	High	Master Protein	Q14683	structural maintenance of chromosomes protein 1a [OS=Homo sapiens]	0	FALSE	508.395	59	75	219	75	1	1233	143.1	7.64	732.81	75	0	34647.9	30294.7	33729.2	34332	24129.1	23603.8		34647.9	32635.3	32600.7	33528	27373	27747.3	33641.6	33064.4	0.982842	27560.1	0.819228	0.903414	0.0338213	TRUE
FALSE	High	Master Protein	Q13813	Spectrin alpha chain, non-erythrocytic 1 [OS=Homo sapiens]	0	FALSE	506.307	37	73	164	1	1	2472	284.4	5.35	639.24	73	0	421.2	365.4	412.6	405.8	578	520		421.2	393.631	398.796	396.297	655.706	611.282	407.416	397.546	0.975776	633.494	1.55491	0.867258	0.0160704	FALSE
FALSE	High	Master Protein	P05455	Lupus La protein [OS=Homo sapiens]	0	FALSE	505.983	69	44	347	44	1	408	46.8	7.12	1166.7	44	0	53503.7	47823.9	50636.3	51043.1	47203.6	45481.7		53503.7	51518.8	48942.2	49847.8	53549.6	53465.7	52511.3	49395	0.940655	53507.7	1.01897	0.581779	0.93215	FALSE
FALSE	High	Master Protein	P50991	T-complex protein 1 subunit delta [OS=Homo sapiens]	0	FALSE	505.039	78	36	532	35	1	539	57.9	7.83	1957.5	36	0	52834.7	50445.2	54965.3	54232.9	47836	45787.7		52834.7	54342.7	53126.4	52962.9	54267	53825.4	53588.7	53044.6	0.989847	54046.2	1.00854	0.960093	0.848075	FALSE
FALSE	High	Master Protein	Q13813-2	Isoform 2 of Spectrin alpha chain, non-erythrocytic 1 [OS=Homo sapiens]	0	FALSE	503.968	37	73	165	1	1	2477	284.9	5.35	640.61	73	73	19574.1	18403.6	23285.8	22631.5	26973.3	25811.7		19574.1	19825.5	22506.7	22101.5	30599.6	30342.8	19699.8	22304.1	1.1322	30471.2	1.54678	0.332426	0.000888217	TRUE
FALSE	High	Master Protein	P26599-3	Isoform 3 of Polypyrimidine tract-binding protein 1 [OS=Homo sapiens]	0	FALSE	501.697	68	26	330	23	1	557	59.6	9.16	1399.89	26	3	27634.4	26222.1	21600.4	21604.4	24691.2	25008.6		27634.4	28248.1	20877.7	21098.5	28010.7	29398.7	27941.2	20988.1	0.751151	28704.7	1.02732	0.0131449	1	FALSE
FALSE	High	Master Protein	P29401-2	Isoform 2 of Transketolase [OS=Homo sapiens]	0	FALSE	501.586	65	38	380	38	1	631	68.8	7.52	1497.43	38	0	40687.4	37439.4	45574.4	45874.8	45630.7	44088.4	Acetyl [N-Term]	40687.4	40332	44049.6	44800.5	51765.3	51827.8	40509.7	44425.1	1.09665	51796.5	1.27862	0.472422	0.107851	TRUE
FALSE	High	Master Protein	P02545	Prelamin-A/C [OS=Homo sapiens]	0	FALSE	499.711	66	58	344	55	1	664	74.1	7.02	1340.75	58	3	47245.3	42409.1	60013.1	58661.1	54695	52863.9		47245.3	45685.7	58005.3	57287.4	62048.2	62143.8	46465.5	57646.3	1.24063	62096	1.33639	0.0829403	0.0479778	TRUE
FALSE	High	Master Protein	P31939	bifunctional purine biosynthesis protein purH [OS=Homo sapiens]	0	FALSE	499.019	80	44	392	43	1	592	64.6	6.71	1345.63	44	1	37824.1	35673.7	40730.5	40007.5	29880.3	28548.3		37824.1	38429.9	39367.8	39070.6	33897.4	33559.8	38127	39219.2	1.02865	33728.6	0.884637	0.811142	0.145631	FALSE
FALSE	High	Master Protein	Q15393-1	Splicing factor 3B subunit 3 [OS=Homo sapiens]	0	FALSE	498.315	57	58	368	57	1	1217	135.5	5.26	1215.96	58	0	40464.4	36647.4	40959.4	40359.6	35687.5	34884.5		40464.4	39478.8	39589	39414.4	40485.3	41008.2	39971.6	39501.7	0.988245	40746.8	1.01939	0.947102	0.935538	FALSE
FALSE	High	Master Protein	Q9Y520-4	Isoform 4 of Protein PRRC2C [OS=Homo sapiens]	0	FALSE	497.818	31	73	252	69	1	2817	308.4	9.07	819.82	73	6	33962.4	29767.1	26754.5	26624.1	26601.4	24859.8		33962.4	32066.9	25859.4	26000.6	30177.7	29223.8	33014.7	25930	0.785408	29700.7	0.899622	0.0330805	0.192806	TRUE
FALSE	High	Master Protein	P78344-1	Eukaryotic translation initiation factor 4 gamma 2 [OS=Homo sapiens]	0	FALSE	497.397	58	50	336	3	1	907	102.3	7.14	1003.39	50	61	32349.9	30276.1	30944.6	30861.7	34561.9	33096.2		32349.9	32615.3	29909.3	30139	39208.4	38906	32482.6	30024.1	0.924315	39057.2	1.2024	0.473301	0.262604	FALSE
FALSE	High	Master Protein	P50990	T-complex protein 1 subunit theta [OS=Homo sapiens]	0	FALSE	493.785	71	41	532	41	1	548	59.6	5.6	1910.97	41	0	68907.3	64188.5	69136.6	67753.7	60362.6	57301.5		68907.3	69147.8	66823.5	66167	68477.7	67360.4	69027.5	66495.3	0.963315	67919	0.983941	0.748879	0.658186	TRUE
FALSE	High	Master Protein	Q12906-7	Isoform 7 of Interleukin enhancer-binding factor 3 [OS=Homo sapiens]	0	FALSE	493.744	57	42	429	35	1	898	95.7	8.81	1380.93	42	7	41244.2	37333.1	41315.1	41240.8	30197.7	29346.1		41244.2	40217.5	39932.8	40275	34257.5	34497.6	40730.9	40103.9	0.984608	34377.5	0.844017	0.917671	0.0615682	TRUE
FALSE	High	Master Protein	P33991	DNA replication licensing factor MCM4 [OS=Homo sapiens]	0	FALSE	492.21	60	44	231	43	1	863	96.5	6.74	889.5	44	1	36168.7	32818	31960.4	31458.7	22719.8	22448		36168.7	35353.6	30891.1	30722	25774.2	26388.6	35761.1	30806.6	0.861454	26081.4	0.729323	0.174778	0.00237315	TRUE
FALSE	High	Master Protein	P12268	inosine-5'-monophosphate dehydrogenase 2 [OS=Homo sapiens]	0	FALSE	489.041	59	32	324	29	1	514	55.8	6.9	1307.13	32	3	37572.7	34705.5	38531.1	38193.4	36293.3	34683.7		37572.7	37386.9	37242	37299	41172.6	40772.2	37479.8	37270.5	0.994415	40972.4	1.09319	0.997178	0.673449	FALSE
FALSE	High	Master Protein	Q15029	116 kDa U5 small nuclear ribonucleoprotein component [OS=Homo sapiens]	0	FALSE	487.675	66	56	297	55	1	972	109.4	5	1055.12	56	0	37522.2	34495.1	36950	36311.3	34311.6	33342.1		37522.2	37160.2	35713.8	35460.9	38924.4	39195.1	37341.2	35587.4	0.953032	39059.8	1.04602	0.670985	0.904763	FALSE
FALSE	High	Master Protein	Q7L014	probable ATP-dependent RNA helicase DDX46 [OS=Homo sapiens]	0	FALSE	486.245	44	51	284	51	1	1031	117.3	9.29	945.18	51	0	39887.6	35546.4	33057.2	32960.5	36001.2	34265.7		39887.6	38292.8	31951.2	32188.6	40841.2	40280.8	39090.2	32069.9	0.820409	40561	1.03763	0.0759273	0.94744	FALSE
FALSE	High	Master Protein	P13010	X-ray repair cross-complementing protein 5 [OS=Homo sapiens]	0	FALSE	482.876	55	40	391	39	1	732	82.7	5.81	1356.94	40	1	51876.7	47708.4	53264.3	53167.7	46284	45004.7		51876.7	51394.4	51482.3	51922.6	52506.4	52905	51635.6	51702.4	1.0013	52705.7	1.02072	0.963256	0.946345	TRUE
FALSE	High	Master Protein	P49915	GMP synthase [glutamine-hydrolyzing] [OS=Homo sapiens]	0	FALSE	482.815	73	47	299	47	1	693	76.7	6.87	1076.42	47	0	41941.9	38127.9	44976.6	44496.4	35492.5	34380.2		41941.9	41073.7	43471.8	43454.4	40264.1	40415.4	41507.8	43463.1	1.04711	40339.7	0.971859	0.712024	0.571643	FALSE
FALSE	High	Master Protein	Q13263	Transcription intermediary factor 1-beta [OS=Homo sapiens]	0	FALSE	481.936	64	35	287	35	1	835	88.5	5.77	1114.77	35	0	32590.4	29970.9	33606.7	33850.1	25974.3	25633.3		32590.4	32286.5	32482.3	33057.4	29466.3	30133	32438.4	32769.9	1.01022	29799.7	0.918652	0.913214	0.267755	FALSE
FALSE	High	Master Protein	P49454	Centromere protein F [OS=Homo sapiens]	0	FALSE	480.733	25	71	171	70	1	3210	367.5	5.07	593.17	71	0	21621.6	19749.7	22651.2	22200.1	14623.3	14118.7		21621.6	21275.6	21893.4	21680.2	16589.2	16597.1	21448.6	21786.8	1.01577	16593.2	0.773626	0.882239	0.091408	FALSE
FALSE	High	Master Protein	Q29RF7-1	Sister chromatid cohesion protein PDS5 homolog A [OS=Homo sapiens]	0	FALSE	478.109	46	55	185	49	1	1337	150.7	7.91	645.54	55	9	23747.5	21394.6	22721.2	22005.6	18699.3	18001.5		23747.5	23047.6	21961	21490.3	21213.2	21161.5	23397.5	21725.6	0.928544	21187.4	0.905539	0.500269	0.214244	TRUE
FALSE	High	Master Protein	Q14974	Importin subunit beta-1 [OS=Homo sapiens]	0	FALSE	477.05	55	38	340	38	1	876	97.1	4.78	1295.42	38	0	36754.8	33884.4	37684.5	37083.5	31348	29947.4		36754.8	36502.4	36423.7	36215.1	35562.4	35204.5	36628.6	36319.4	0.991559	35383.4	0.966006	0.973982	0.531758	TRUE
FALSE	High	Master Protein	P14866	Heterogeneous nuclear ribonucleoprotein L [OS=Homo sapiens]	0	FALSE	477.016	70	30	363	29	1	589	64.1	8.22	1393.91	30	1	37933.8	36255.9	38447.7	38429.8	30460.8	30836.2		37933.8	39057.1	37161.4	37529.8	34555.9	36249.3	38495.4	37345.6	0.970131	35402.6	0.919657	0.802015	0.272204	TRUE
FALSE	High	Master Protein	P60842	Eukaryotic initiation factor 4A-I [OS=Homo sapiens]	0	FALSE	476.857	80	33	545	15	1	406	46.1	5.48	1946.29	33	18	66750.7	63238.7	62117.5	61724.5	64932.7	62279.9		66750.7	68124.6	60039.3	60279	73662.2	73212.7	67437.7	60159.1	0.892071	73437.5	1.08897	0.295863	0.693259	FALSE
FALSE	High	Master Protein	Q15075	Early endosome antigen 1 [OS=Homo sapiens]	0	FALSE	475.507	45	62	151	62	1	1411	162.4	5.68	618.56	62	0	23994.5	21350.5	19927.8	19514.2	36236.2	34290.5		23994.5	23000.1	19261.1	19057.2	41107.8	40310	23497.3	19159.1	0.815377	40708.9	1.73249	0.0672672	6.42065e-06	FALSE
FALSE	High	Master Protein	Q7KZF4	staphylococcal nuclease domain-containing protein 1 [OS=Homo sapiens]	0	FALSE	472.78	55	47	412	47	1	910	101.9	7.17	1347.86	47	0	43599	40643.5	36501.2	35930.7	38001	36567.7		43599	43783.7	35280	35089.3	43109.8	42986.9	43691.3	35184.6	0.8053	43048.4	0.985284	0.0537781	0.668122	TRUE
FALSE	High	Master Protein	Q10567-3	Isoform C of AP-1 complex subunit beta-1 [OS=Homo sapiens]	0	FALSE	472.022	51	50	278	26	1	939	103.5	5.16	951.59	50	0	16863.8	15638.4	17569.6	17378.2	15832.4	15131		16863.8	16846.6	16981.8	16971.2	17960.9	17787.1	16855.2	16976.5	1.0072	17874	1.06044	0.962834	0.729893	TRUE
FALSE	High	Master Protein	P12956	X-ray repair cross-complementing protein 6 [OS=Homo sapiens]	0	FALSE	471.661	69	49	386	49	1	609	69.8	6.64	1360.04	49	0	63943.7	59206.5	66692.9	66665.9	57311	56216.7		63943.7	63780.9	64461.6	65104.7	65015.9	66085.1	63862.3	64783.1	1.01442	65550.5	1.02644	0.889748	0.992774	TRUE
FALSE	High	Master Protein	Q92614-1	Unconventional myosin-XVIIIa [OS=Homo sapiens]	0	FALSE	470.756	34	65	191	64	1	2054	233	6.3	685.04	65	1	24655.9	22364.1	24388.4	23784.9	23802.7	22816.7		24655.9	24092	23572.4	23227.9	27002.7	26822	24373.9	23400.2	0.960049	26912.4	1.10415	0.723814	0.623041	FALSE
FALSE	High	Master Protein	Q9NR09	Baculoviral IAP repeat-containing protein 6 [OS=Homo sapiens]	0	FALSE	466.614	17	68	188	68	1	4857	529.9	6.05	620.12	68	0	16843.8	15572.6	17207.7	16991.2	16220.2	15222.3		16843.8	16775.8	16632	16593.3	18400.8	17894.5	16809.8	16612.6	0.988272	18147.7	1.07959	0.914859	0.641711	FALSE
FALSE	High	Master Protein	Q92499	ATP-dependent RNA helicase DDX1 [OS=Homo sapiens]	0	FALSE	466.463	58	45	466	45	1	740	82.4	7.23	1462.85	45	0	40387.2	37424.6	43351.9	42562.4	39443.2	38099.8		40387.2	40316.1	41901.5	41565.7	44745.9	44787.9	40351.6	41733.6	1.03425	44766.9	1.10942	0.780664	0.599374	TRUE
FALSE	High	Master Protein	O95347-1	structural maintenance of chromosomes protein 2 [OS=Homo sapiens]	0	FALSE	466.399	43	52	184	52	1	1197	135.6	8.43	713.51	52	0	33661.1	30726.4	33513.9	32986.1	20140.8	19277.4		33661.1	33100.4	32392.6	32213.6	22848.5	22661.4	33380.7	32303.1	0.967718	22755	0.68168	0.783086	0.000423581	TRUE
FALSE	High	Master Protein	Q01813	ATP-dependent 6-phosphofructokinase, platelet type [OS=Homo sapiens]	0	FALSE	465.099	45	34	350	30	1	784	85.5	7.55	1225.97	34	7	33617.3	32070.5	43039.7	42301.5	34604.4	33200.2		33617.3	34548.3	41599.7	41310.9	39256.6	39028.3	34082.8	41455.3	1.21631	39142.4	1.14845	0.118193	0.438317	TRUE
FALSE	High	Master Protein	P08670	Vimentin [OS=Homo sapiens]	0	FALSE	464.76	82	48	501	42	1	466	53.6	5.12	1721.05	48	6	50223.7	46095.5	51245.7	51534.3	63200.8	61604.2		50223.7	49656.9	49531.2	50327.5	71697.5	72418.4	49940.3	49929.3	0.99978	72057.9	1.44288	0.971773	0.00783825	FALSE
FALSE	High	Master Protein	P56192	Methionine--tRNA ligase, cytoplasmic [OS=Homo sapiens]	0	FALSE	464.739	58	43	219	43	1	900	101.1	6.16	859.93	43	0	24514.9	22650.7	24205.5	23790	20431.3	19480		24514.9	24400.7	23395.7	23232.9	23178.1	22899.6	24457.8	23314.3	0.953244	23038.8	0.941982	0.672564	0.384123	TRUE
FALSE	High	Master Protein	P07237	Protein disulfide-isomerase [OS=Homo sapiens]	0	FALSE	464.678	80	46	338	46	1	508	57.1	4.87	1236.06	46	0	48624.6	44524.3	53569.6	52337.6	50573.9	48359.7		48624.6	47964.3	51777.3	51111.9	57373	56848.9	48294.5	51444.6	1.06523	57111	1.18256	0.619232	0.320579	TRUE
FALSE	High	Master Protein	Q9NR30-1	Nucleolar RNA helicase 2 [OS=Homo sapiens]	0	FALSE	463.964	53	46	299	44	1	783	87.3	9.28	1118.77	46	2	38916.6	34964.4	31578.9	30839.2	27639.4	26640		38916.6	37665.8	30522.4	30117	31355.2	31316.5	38291.2	30319.7	0.791819	31335.8	0.818356	0.0388427	0.0330822	TRUE
FALSE	High	Master Protein	P55196-4	Afadin [OS=Homo sapiens]	0	FALSE	463.629	41	68	176	5	1	1824	206.7	6.47	631.55	68	65	20087	18475.6	24447	23887.5	18101	17331.7		20087	19903	23629.1	23328.1	20534.5	20374.2	19995	23478.6	1.17422	20454.3	1.02297	0.205664	0.964594	TRUE
FALSE	High	Master Protein	P55884-2	Isoform 2 of Eukaryotic translation initiation factor 3 subunit B [OS=Homo sapiens]	0	FALSE	463.049	55	44	271	44	1	873	99	5.08	967.66	44	0	28866	26743.9	25379.3	24934.6	31802.5	30213.9		28866	28810.2	24530.2	24350.7	36078	35517.7	28838.1	24440.4	0.847506	35797.9	1.24134	0.133876	0.170877	FALSE
FALSE	High	Master Protein	Q02790	Peptidyl-prolyl cis-trans isomerase FKBP4 [OS=Homo sapiens]	0	FALSE	462.781	78	43	434	42	1	459	51.8	5.43	1368.93	43	1	56966.5	53139.1	55675.7	55747.2	55853.6	53441.5		56966.5	57244.7	53813	54441.7	63362.5	62822.8	57105.6	54127.3	0.947846	63092.7	1.10484	0.632949	0.619892	FALSE
FALSE	High	Master Protein	P52701	DNA mismatch repair protein MSH6 [OS=Homo sapiens]	0	FALSE	462.188	46	55	221	55	1	1360	152.7	6.9	791.62	55	0	30825.9	28253.8	27385.6	27013.6	19368.8	18671.2		30825.9	30436.7	26469.4	26381	21972.7	21948.8	30631.3	26425.2	0.862685	21960.8	0.716938	0.178796	0.00154889	TRUE
FALSE	High	Master Protein	P49321	Nuclear autoantigenic sperm protein [OS=Homo sapiens]	0	FALSE	462.135	66	38	439	38	1	788	85.2	4.3	1887.05	38	0	43005	40203.7	43492.5	42664.4	28201.7	27541.3		43005	43309.9	42037.4	41665.3	31993.1	32376	43157.4	41851.3	0.969736	32184.5	0.745747	0.798911	0.00408446	TRUE
FALSE	High	Master Protein	Q14697-2	Isoform 2 of Neutral alpha-glucosidase AB [OS=Homo sapiens]	0	FALSE	460.943	52	46	311	3	1	966	109.4	6.24	1068.5	46	48	29675.3	27402.3	36620.2	35431.6	29428.5	27889.9		29675.3	29519.4	35395	34601.9	33384.9	32785.8	29597.4	34998.4	1.18248	33085.3	1.11785	0.185553	0.562445	TRUE
FALSE	High	Master Protein	O14980	Exportin-1 [OS=Homo sapiens]	0	FALSE	459.608	45	47	356	47	1	1071	123.3	6.06	1160.48	47	0	41507.3	38630.8	47284.5	46364.4	30655	28961.7		41507.3	41615.5	45702.5	45278.6	34776.2	34045.7	41561.4	45490.6	1.09454	34411	0.827956	0.481654	0.0420334	FALSE
FALSE	High	Master Protein	P26639-1	Threonine--tRNA ligase, cytoplasmic [OS=Homo sapiens]	0	FALSE	457.732	67	48	416	43	1	723	83.4	6.67	1244.86	48	5	45818.1	46226.9	43996.2	43636.7	42414.7	40211.3		45818.1	49798.4	42524.2	42614.8	48116.9	47270.1	47808.3	42569.5	0.890422	47693.5	0.997599	0.288176	0.761791	TRUE
FALSE	High	Master Protein	Q14697-1	Neutral alpha-glucosidase AB [OS=Homo sapiens]	0	FALSE	457.249	52	45	313	2	1	944	106.8	6.14	1071.96	45	0	1070.8	882.3	1125.5	1013.7	817.3	726.6		1070.8	950.468	1087.84	989.961	927.177	854.149	1010.63	1038.9	1.02797	890.663	0.881292	0.913178	0.73929	FALSE
FALSE	High	Master Protein	Q92945	Far upstream element-binding protein 2 [OS=Homo sapiens]	0	FALSE	455.952	59	40	435	35	1	711	73.1	7.3	1594.84	40	4	37874.3	34971.2	35684.9	35231.5	29137.6	28499.8		37874.3	37673.1	34491	34406.4	33054.8	33502.7	37773.7	34448.7	0.911976	33278.8	0.881004	0.399386	0.135649	TRUE
FALSE	High	Master Protein	P11413-2	Isoform Long of Glucose-6-phosphate 1-dehydrogenase [OS=Homo sapiens]	0	FALSE	455.301	72	40	351	40	1	561	63.8	6.89	1299.33	40	0	46598.2	43166.6	30396.7	30294.8	48804.3	46514.6		46598.2	46501.7	29379.7	29585.3	55365.5	54679.9	46550	29482.5	0.633353	55022.7	1.18201	0.000234204	0.322275	FALSE
FALSE	High	Master Protein	P15311	Ezrin [OS=Homo sapiens]	0	FALSE	455.008	63	48	420	31	1	586	69.4	6.27	1216.85	48	3	29700.6	26823.8	33571.1	33064.8	27689	25730.3		29700.6	28896.2	32447.9	32290.5	31411.5	30247.1	29298.4	32369.2	1.10481	30829.3	1.05225	0.437704	0.873277	TRUE
FALSE	High	Master Protein	Q9Y4E8	ubiquitin carboxyl-terminal hydrolase 15 [OS=Homo sapiens]	0	FALSE	449.374	51	51	234	49	1	981	112.3	5.22	825.71	51	2	28103.7	25787.8	30297.1	29724	29743.9	28038.5		28103.7	27780.2	29283.5	29027.9	33742.7	32960.5	27941.9	29155.7	1.04344	33351.6	1.1936	0.731398	0.287358	TRUE
FALSE	High	Master Protein	Q15021	condensin complex subunit 1 [OS=Homo sapiens]	0	FALSE	448.86	44	52	149	52	1	1401	157.1	6.61	585.7	52	0	29476.8	27276.5	27944.9	28155.4	21643.7	20798.8		29476.8	29383.9	27010	27496	24553.5	24449.9	29430.4	27253	0.926017	24501.7	0.832531	0.484056	0.0469742	TRUE
FALSE	High	Master Protein	P13796	Plastin-2 [OS=Homo sapiens]	0	FALSE	448.029	69	40	417	32	1	627	70.2	5.43	1390.42	40	10	47284.2	43384.2	40493.5	39439.2	51528.9	48256.4		47284.2	46736.1	39138.7	38515.6	58456.4	56727.5	47010.2	38827.2	0.825931	57591.9	1.2251	0.0856866	0.20571	FALSE
FALSE	High	Master Protein	Q08J23	tRNA (Cytosine(34)-C(5))-methyltransferase [OS=Homo sapiens]	0	FALSE	447.61	73	49	233	49	1	767	86.4	6.77	765.18	49	0	34322.9	31215.8	22545.2	22323	26514.6	25357.7		34322.9	33627.6	21790.9	21800.2	30079.2	29809.1	33975.2	21795.6	0.641514	29944.1	0.881352	0.000323311	0.136581	TRUE
FALSE	High	Master Protein	P78347	General transcription factor II-I [OS=Homo sapiens]	0	FALSE	447.297	53	55	267	55	1	998	112.3	6.39	932.65	55	0	37095.7	33840.4	31923.4	32383.9	26278.1	25789.1		37095.7	36455	30855.4	31625.5	29810.9	30316.2	36775.3	31240.4	0.849495	30063.6	0.817492	0.139209	0.0323633	TRUE
FALSE	High	Master Protein	O60264	SWI/SNF-related matrix-associated actin-dependent regulator of chromatin subfamily A member 5 [OS=Homo sapiens]	0	FALSE	447.247	51	63	276	44	1	1052	121.8	8.09	939.62	63	18	33824.5	31214.7	36032.3	34879.5	26856	26103.6		33824.5	33626.4	34826.8	34062.7	30466.5	30685.9	33725.4	34444.7	1.02133	30576.2	0.906621	0.851393	0.218344	FALSE
FALSE	High	Master Protein	P11586	C-1-tetrahydrofolate synthase, cytoplasmic [OS=Homo sapiens]	0	FALSE	447.204	55	46	224	46	1	935	101.5	7.3	833.56	46	0	28425.6	25804.4	28654.3	28285.2	24532	23423.7		28425.6	27798.1	27695.6	27622.8	27830.1	27535.6	28111.8	27659.2	0.983899	27682.8	0.984739	0.911946	0.66408	TRUE
FALSE	High	Master Protein	P78344-2	Isoform 2 of Eukaryotic translation initiation factor 4 gamma 2 [OS=Homo sapiens]	0	FALSE	446.496	57	48	316	1	1	869	98.1	6.99	921.33	48	0	487.8	451.6	389.5	405.3	552.7	521.6		487.8	486.491	376.469	395.809	627.005	613.163	487.146	386.139	0.792655	620.084	1.27289	0.22286	0.218299	FALSE
FALSE	High	Master Protein	P49411	elongation factor Tu, mitochondrial [OS=Homo sapiens]	0	FALSE	444.655	73	32	344	32	1	452	49.5	7.61	1202.32	32	0	41241.6	37832.4	41402.1	41898.8	35447.1	34977.5		41241.6	40755.4	40016.9	40917.6	40212.6	41117.6	40998.5	40467.3	0.987043	40665.1	0.991867	0.937364	0.717662	TRUE
FALSE	High	Master Protein	P33992	DNA replication licensing factor mcm5 [OS=Homo sapiens]	0	FALSE	444.31	57	44	314	44	1	734	82.2	8.37	1089.57	44	0	40831.7	37835.3	29779	28876.3	27362.3	26529.6		40831.7	40758.5	28782.7	28200.1	31040.9	31186.7	40795.1	28491.4	0.698402	31113.8	0.762684	0.00255478	0.00695818	TRUE
FALSE	High	Master Protein	P49736	DNA replication licensing factor mcm2 [OS=Homo sapiens]	0	FALSE	443.758	56	45	285	45	1	904	101.8	5.52	1102.83	45	0	34422.5	31616.6	31552	30969.4	22437.8	21667.1		34422.5	34059.3	30496.4	30244.1	25454.3	25470.6	34240.9	30370.3	0.886958	25462.5	0.743627	0.272472	0.0038135	TRUE
FALSE	High	Master Protein	O95714	E3 ubiquitin-protein ligase HERC2 [OS=Homo sapiens]	0	FALSE	442.618	19	77	174	75	1	4834	526.9	6.28	565.75	77	2	17646.9	16580.3	17040.1	16662.7	16142.7	15513.5		17646.9	17861.3	16470	16272.5	18312.9	18236.8	17754.1	16371.2	0.92211	18274.8	1.02933	0.44353	0.880619	FALSE
FALSE	High	Master Protein	Q9NTJ3-1	Structural maintenance of chromosomes protein 4 [OS=Homo sapiens]	0	FALSE	442.372	42	54	190	54	1	1288	147.1	6.79	675.37	54	0	25913.3	23620.8	24922.3	24595.1	15557.6	14975.9		25913.3	25445.8	24088.5	24019.1	17649.2	17604.8	25679.5	24053.8	0.936692	17627	0.686421	0.554433	0.0201689	TRUE
FALSE	High	Master Protein	P25205-2	Isoform 2 of DNA replication licensing factor MCM3 [OS=Homo sapiens]	0	FALSE	441.554	61	50	259	50	1	853	95.8	5.77	952.71	50	0	45263.5	40499.6	30436.1	30010.1	28906.8	27836.5		45263.5	43628.7	29417.8	29307.3	32793	32723	44446.1	29362.6	0.660633	32758	0.737028	0.000670811	0.00307156	TRUE
FALSE	High	Master Protein	Q14789-4	Isoform 4 of Golgin subfamily B member 1 [OS=Homo sapiens]	0	FALSE	438.94	25	69	128	67	1	3184	367.2	5.02	488.04	69	2	14750.5	13660.5	16306.3	16410.9	16617.2	16251.9		14750.5	14715.9	15760.7	16026.6	18851.2	19104.8	14733.2	15893.7	1.07876	18978	1.28811	0.650156	0.0762681	TRUE
FALSE	High	Master Protein	Q96AE4-2	Isoform 2 of Far upstream element-binding protein 1 [OS=Homo sapiens]	0	FALSE	438.815	54	33	319	2	1	653	68.6	7.31	1177.02	33	36	29755.2	27261.3	29367.3	29688.4	26895.9	26146.9		29755.2	29367.5	28384.8	28993.1	30511.8	30736.8	29561.4	28689	0.970488	30624.3	1.03596	0.80483	0.95595	FALSE
FALSE	High	Master Protein	P55060-1	Exportin-2 [OS=Homo sapiens]	0	FALSE	437.92	55	50	222	50	1	971	110.3	5.77	762.28	50	0	31088.2	28798.9	32785.3	31757.7	24766.7	23587.2		31088.2	31023.9	31688.4	31014	28096.3	27727.8	31056.1	31351.2	1.0095	27912	0.898763	0.917207	0.18983	FALSE
FALSE	High	Master Protein	P50570-5	Isoform 5 of Dynamin-2 [OS=Homo sapiens]	0	FALSE	435.488	63	53	259	4	1	869	97.9	7.44	804.96	53	55	28289.8	26229.4	26612.9	26476.8	25959.9	25016.4		28289.8	28255.9	25722.5	25856.8	29449.9	29407.9	28272.9	25789.6	0.91217	29428.9	1.04089	0.400488	0.930833	FALSE
FALSE	High	Master Protein	P15170-3	Isoform 3 of Eukaryotic peptide chain release factor GTP-binding subunit ERF3A [OS=Homo sapiens]	0	FALSE	434.608	51	37	285	18	1	637	68.7	5.33	886.81	37	24	31123.1	28799.8	28935.4	28774.4	29320.1	27897		31123.1	31024.9	27967.3	28100.6	33261.9	32794.1	31074	28033.9	0.902167	33028	1.06288	0.3459	0.820017	FALSE
FALSE	High	Master Protein	P06576	ATP synthase subunit beta, mitochondrial [OS=Homo sapiens]	0	FALSE	434.362	74	28	318	28	1	529	56.5	5.4	1157.17	28	0	30701.2	29449.5	37063.1	36970.9	28845.5	29026.8		30701.2	31724.8	35823.1	36105.1	32723.5	34122.2	31213	35964.1	1.15222	33422.9	1.0708	0.266833	0.780873	TRUE
FALSE	High	Master Protein	Q93008-3	Probable ubiquitin carboxyl-terminal hydrolase FAF-X [OS=Homo sapiens]	0	FALSE	434.202	28	71	237	69	1	2570	292.1	5.8	786	71	2	27740.3	25568.2	29203.7	28417.9	26657.4	24938		27740.3	27543.6	28226.6	27752.4	30241.2	29315.7	27642	27989.5	1.01257	29778.4	1.07729	0.900045	0.74918	TRUE
FALSE	High	Master Protein	P35573-1	glycogen debranching enzyme [OS=Homo sapiens]	0	FALSE	434.03	39	53	168	53	1	1532	174.7	6.76	587.13	53	0	20240.3	18995	19878.4	19573.8	17029.1	16207.6		20240.3	20462.6	19213.3	19115.4	19318.5	19052.7	20351.4	19164.4	0.941672	19185.6	0.942715	0.567792	0.648086	TRUE
FALSE	High	Master Protein	Q14690	Protein RRP5 homolog [OS=Homo sapiens]	0	FALSE	433.38	34	59	155	59	1	1871	208.6	8.87	586.17	59	0	21995.5	20495.1	17677.6	17335.8	15043.8	14806.4		21995.5	22078.6	17086.2	16929.8	17066.3	17405.6	22037	17008	0.771791	17235.9	0.782134	0.0235597	0.10394	TRUE
FALSE	High	Master Protein	P55196-1	Isoform 2 of Afadin [OS=Homo sapiens]	0	FALSE	432.626	40	64	163	1	1	1816	205.5	6.77	587.67	64	0	90.3	86.4	108.4	99.6	87.9	89		90.3	93.0754	104.773	97.2675	99.7172	104.623	91.6877	101.02	1.10179	102.17	1.11433	0.764644	0.496523	TRUE
FALSE	High	Master Protein	P30101	Protein disulfide-isomerase A3 [OS=Homo sapiens]	0	FALSE	431.348	67	43	345	42	1	505	56.7	6.35	1162.15	43	0	40825.3	37336.8	46812.3	45981	42327.9	40837.2		40825.3	40221.5	45246.1	44904.2	48018.4	48005.9	40523.4	45075.2	1.11232	48012.2	1.1848	0.407067	0.313635	TRUE
FALSE	High	Master Protein	P49589-3	Isoform 3 of Cysteine--tRNA ligase, cytoplasmic [OS=Homo sapiens]	0	FALSE	430.547	58	48	229	48	1	831	94.6	6.83	839.98	48	0	26733.3	24666.4	24566.9	24416.7	27425.6	25743.2		26733.3	26572.2	23745	23844.9	31112.7	30262.2	26652.7	23794.9	0.892777	30687.5	1.15138	0.299197	0.427318	FALSE
FALSE	High	Master Protein	P54577	Tyrosine--tRNA ligase, cytoplasmic [OS=Homo sapiens]	0	FALSE	430.161	77	47	325	46	1	528	59.1	7.05	1065.01	47	1	52039.2	47646.2	42399.4	43315	45512	43940.5		52039.2	51327.4	40980.9	42300.6	51630.6	51653.9	51683.3	41640.7	0.805691	51642.3	0.999206	0.054274	0.774308	TRUE
FALSE	High	Master Protein	P54136-1	arginine--tRNA ligase, cytoplasmic [OS=Homo sapiens]	0	FALSE	429.99	60	41	390	5	1	660	75.3	6.68	1486.59	41	40	37194.3	34734.5	36858	36068.2	40441.8	37901.5		37194.3	37418.1	35624.9	35223.5	45878.8	44554.8	37306.2	35424.2	0.949552	45216.8	1.21204	0.645361	0.237228	FALSE
FALSE	High	Master Protein	Q14C86-6	Isoform 6 of GTPase-activating protein and VPS9 domain-containing protein 1 [OS=Homo sapiens]	0	FALSE	429.486	37	52	215	52	1	1487	166.1	5.21	719.68	52	0	23078.2	21332.3	25873.3	25224	23125	21898.2		23078.2	22980.5	25007.7	24633.3	26233.9	25742.3	23029.3	24820.5	1.07778	25988.1	1.12848	0.558257	0.517477	TRUE
FALSE	High	Master Protein	O43143	Pre-mRNA-splicing factor ATP-dependent RNA helicase DHX15 [OS=Homo sapiens]	0	FALSE	429.092	54	47	343	46	1	795	90.9	7.46	1136.12	47	2	35121.4	32733.2	36485.5	36046	28432.6	27864.9		35121.4	35262.2	35264.8	35201.9	32255.1	32756.4	35191.8	35233.3	1.00118	32505.7	0.923673	0.963902	0.290491	FALSE
FALSE	High	Master Protein	Q8N3C0	Activating signal cointegrator 1 complex subunit 3 [OS=Homo sapiens]	0	FALSE	428.434	36	72	187	71	1	2202	251.3	7.09	597.97	72	1	19121.9	17529.1	17939.7	17792.1	17166.2	16171.4		19121.9	18883.4	17339.5	17375.4	19474	19010.2	19002.7	17357.5	0.913423	19242.1	1.0126	0.393761	0.963884	FALSE
FALSE	High	Master Protein	Q5JSL3	dedicator of cytokinesis protein 11 [OS=Homo sapiens]	0	FALSE	426.261	35	66	187	65	1	2073	237.5	7.74	622.95	66	2	18876.8	17367	21984.5	21472.2	14360.3	13513		18876.8	18708.8	21249	20969.4	16290.9	15885.1	18792.8	21109.2	1.12326	16088	0.856073	0.364844	0.276816	FALSE
FALSE	High	Master Protein	P47897	glutamine--tRNA ligase [OS=Homo sapiens]	0	FALSE	426.234	57	47	264	46	1	775	87.7	7.15	922.56	47	0	23727.1	21897.9	24146.3	23867.6	24032.8	22585.9		23727.1	23589.8	23338.4	23308.7	27263.8	26550.7	23658.4	23323.6	0.985845	26907.2	1.13732	0.927673	0.481544	FALSE
FALSE	High	Master Protein	P50570-3	Isoform 3 of Dynamin-2 [OS=Homo sapiens]	0	FALSE	425.766	62	52	273	2	1	866	97.5	7.65	826.87	52	1	985.3	956.5	1170.8	1138.2	1299.4	1287.1		985.3	1030.4	1131.63	1111.55	1474.09	1513.04	1007.85	1121.59	1.11285	1493.57	1.48193	0.589671	0.0112436	TRUE
FALSE	High	Master Protein	Q93009	Ubiquitin carboxyl-terminal hydrolase 7 [OS=Homo sapiens]	0	FALSE	425.512	54	52	206	52	1	1102	128.2	5.55	733.4	52	0	26088.5	23457.6	26420.9	26301.9	21964.3	21255.8		26088.5	25270	25536.9	25686	24917.2	24987.1	25679.2	25611.5	0.99736	24952.1	0.971685	0.985384	0.570439	TRUE
FALSE	High	Master Protein	P23921	Ribonucleoside-diphosphate reductase large subunit [OS=Homo sapiens]	0	FALSE	425.094	59	40	242	40	1	792	90	7.15	880.26	40	0	24932.2	23012.6	25506.1	25397.6	24271.6	23058.9		24932.2	24790.6	24652.8	24802.8	27534.7	27106.7	24861.4	24727.8	0.994626	27320.7	1.09892	0.998891	0.646869	FALSE
FALSE	High	Master Protein	P11940-1	Polyadenylate-binding protein 1 [OS=Homo sapiens]	0	FALSE	424.492	66	38	417	10	1	636	70.6	9.5	1445.92	38	31	44053.4	41917.4	43379.2	43432.2	38375.7	37001.6	Acetyl [N-Term]	44053.4	45156	41927.9	42415.1	43534.9	43497	44604.7	42171.5	0.945449	43515.9	0.975591	0.615682	0.597793	TRUE
FALSE	High	Master Protein	P68366	Tubulin alpha-4A chain [OS=Homo sapiens]	0	FALSE	421.759	62	28	1551	6	1	448	49.9	5.06	5515.33	28	0	5244.1	4920.3	5324.8	5120.1	5173.1	4859		5244.1	5300.45	5146.65	5000.2	5868.57	5711.96	5272.27	5073.42	0.962284	5790.27	1.09825	0.667486	0.548638	FALSE
FALSE	High	Master Protein	Q12888-2	Isoform 2 of TP53-binding protein 1 [OS=Homo sapiens]	0	FALSE	419.28	39	48	124	48	1	1977	214	4.7	518.26	48	0	13730.3	12808.4	17139.2	16656.6	13632.4	13287.9		13730.3	13798	16565.8	16266.5	15465.1	15620.5	13764.1	16416.2	1.19268	15542.8	1.12922	0.270786	0.437436	TRUE
FALSE	High	Master Protein	Q96AE4	Far upstream element-binding protein 1 [OS=Homo sapiens]	0	FALSE	418.864	58	33	279	2	1	644	67.5	7.61	1017.7	33	0	844.5	787.6	878.5	851.3	755.9	709.4		844.5	848.451	849.108	831.364	857.523	833.93	846.475	840.236	0.992629	845.726	0.999115	0.91129	0.79929	TRUE
FALSE	High	Master Protein	Q15751	Probable E3 ubiquitin-protein ligase HERC1 [OS=Homo sapiens]	0	FALSE	416.943	16	70	143	70	1	4861	531.9	6.04	488.69	70	0	14373.3	13266.7	13844.3	13600.5	14775.3	13802.7		14373.3	14291.7	13381.1	13282	16761.7	16225.7	14332.5	13331.6	0.930163	16493.7	1.15079	0.492714	0.361907	FALSE
FALSE	High	Master Protein	O95782	AP-2 complex subunit alpha-1 [OS=Homo sapiens]	0	FALSE	415.646	55	48	262	36	1	977	107.5	7.03	907.56	48	12	32528.7	30077.1	26784	26259	33539.1	32187		32528.7	32400.9	25887.9	25644.1	38048.1	37837.2	32464.8	25766	0.793659	37942.6	1.16873	0.0406466	0.365569	FALSE
FALSE	High	Master Protein	P22626	heterogeneous nuclear ribonucleoproteins A2/B1 [OS=Homo sapiens]	0	FALSE	412.914	68	31	600	26	1	353	37.4	8.95	2102.92	31	5	67412.8	62904.2	65869.7	65833	54926.5	53851.5		67412.8	67764.3	63665.9	64291.3	62310.8	63304.7	67588.5	63978.6	0.94659	62807.8	0.929267	0.623871	0.317311	TRUE
FALSE	High	Master Protein	Q92878-2	Isoform 2 of DNA repair protein RAD50 [OS=Homo sapiens]	0	FALSE	412.069	42	57	237	57	1	1318	154.5	6.89	786	57	0	37150.7	33453.1	36944.1	36217.9	20937.4	20099.2		37150.7	36037.7	35708.1	35369.7	23752.2	23627.5	36594.2	35538.9	0.971162	23689.8	0.647366	0.810142	0.000106678	TRUE
FALSE	High	Master Protein	Q1KMD3	heterogeneous nuclear ribonucleoprotein U-like protein 2 [OS=Homo sapiens]	0	FALSE	411.189	50	43	266	43	1	747	85.1	4.91	949.35	43	0	32417.9	29849.8	34838.4	34670.8	27645.9	27213.6		32417.9	32156	33672.8	33858.9	31362.6	31990.8	32287	33765.8	1.0458	31676.7	0.981098	0.718881	0.637344	FALSE
FALSE	High	Master Protein	A0AVT1-1	Ubiquitin-like modifier-activating enzyme 6 [OS=Homo sapiens]	0	FALSE	410.372	49	48	211	48	1	1052	117.9	6.14	753.37	48	0	28464.8	26343.8	32948.6	32356.3	27584.8	25929.9		28464.8	28379.2	31846.3	31598.6	31293.3	30481.7	28422	31722.4	1.11612	30887.5	1.08675	0.39208	0.70378	TRUE
FALSE	High	Master Protein	Q15418-2	Isoform 2 of Ribosomal protein S6 kinase alpha-1 [OS=Homo sapiens]	0	FALSE	409.081	58	33	186	22	1	744	83.9	8.78	703.37	33	0	11559.9	10900.6	14364.3	14000.1	8792.8	8310.3		11559.9	11742.8	13883.7	13672.2	9974.9	9769.11	11651.3	13778	1.18252	9872.01	0.847285	0.296705	0.282835	FALSE
FALSE	High	Master Protein	P51659-1	peroxisomal multifunctional enzyme type 2 [OS=Homo sapiens]	0	FALSE	407.36	59	40	213	40	1	736	79.6	8.84	802.98	40	0	20537.6	18724.5	24437.8	24593.8	21381.6	21055.8		20537.6	20171.2	23620.2	24017.9	24256.1	24752	20354.4	23819	1.17022	24504.1	1.20387	0.215966	0.258626	TRUE
FALSE	High	Master Protein	Q9BXJ9	N-alpha-acetyltransferase 15, NatA auxiliary subunit [OS=Homo sapiens]	0	FALSE	406.619	65	56	249	49	1	866	101.2	7.42	771.45	56	7	35416.2	32255.4	35907.9	35676	25634.9	24364.7		35416.2	34747.5	34706.5	34840.5	29081.2	28641.7	35081.8	34773.5	0.991212	28861.5	0.82269	0.971165	0.0368985	TRUE
FALSE	High	Master Protein	P05023	Sodium/potassium-transporting ATPase subunit alpha-1 [OS=Homo sapiens]	0	FALSE	406.201	47	46	227	46	1	1023	112.8	5.49	869.16	46	0	34726.3	33747.5	24353.1	23765	35269.8	34372		34726.3	36354.9	23538.3	23208.5	40011.5	40405.8	35540.6	23373.4	0.657654	40208.6	1.13134	0.000600094	0.505683	FALSE
FALSE	High	Master Protein	Q9Y4L1	Hypoxia up-regulated protein 1 [OS=Homo sapiens]	0	FALSE	405.156	44	44	199	44	1	999	111.3	5.22	774.15	44	0	31545.9	28872.2	29165.2	28952.4	35735.3	34122.4		31545.9	31102.9	28189.4	28274.4	40539.5	40112.3	31324.4	28231.9	0.901275	40325.9	1.28737	0.341276	0.0961357	FALSE
FALSE	High	Master Protein	P42345	Serine/threonine-protein kinase mTOR [OS=Homo sapiens]	0	FALSE	405.091	28	55	150	54	1	2549	288.7	7.17	518.11	55	1	17388.4	16286.6	16570.3	16285	14690.4	13729.5		17388.4	17544.9	16015.9	15903.6	16665.4	16139.6	17466.7	15959.8	0.913728	16402.5	0.939074	0.395447	0.629138	TRUE
FALSE	High	Master Protein	O60506	Heterogeneous nuclear ribonucleoprotein Q [OS=Homo sapiens]	0	FALSE	405.09	56	34	345	2	1	623	69.6	8.59	1247.5	34	34	44569.1	41947.2	45323.4	44433.5	41598.2	40106.3		44569.1	45188.1	43807	43392.9	47190.6	47146.7	44878.6	43600	0.97151	47168.7	1.05103	0.812887	0.879444	FALSE
FALSE	High	Master Protein	P16615	Sarcoplasmic/endoplasmic reticulum calcium ATPase 2 [OS=Homo sapiens]	0	FALSE	404.748	42	44	244	36	1	1042	114.7	5.34	842.52	44	10	33005.4	30475.5	32053	31851.3	30275.4	28819.8		33005.4	32830.1	30980.6	31105.4	34345.6	33878.9	32917.7	31043	0.943048	34112.3	1.03629	0.598593	0.954258	FALSE
FALSE	High	Master Protein	Q13428-4	Isoform 4 of Treacle protein [OS=Homo sapiens]	0	FALSE	404.377	30	42	238	42	1	1524	155.8	8.95	780.98	42	0	24818.6	21277.7	19686.6	20006.2	20652	20263.9		24818.6	22921.6	19028	19537.7	23428.4	23821.1	23870.1	19282.8	0.807823	23624.8	0.989721	0.0567581	0.701368	TRUE
FALSE	High	Master Protein	Q63HN8-4	Isoform 2 of E3 ubiquitin-protein ligase RNF213 [OS=Homo sapiens]	0	FALSE	402.932	18	85	153	68	1	5256	596.1	6.43	475.59	85	13	15890.6	14957	17433.4	16986	12627.2	11997.4		15890.6	16112.6	16850.1	16588.2	14324.8	14103.5	16001.6	16719.2	1.04484	14214.1	0.888294	0.794346	0.393765	FALSE
FALSE	High	Master Protein	O14802	DNA-directed RNA polymerase III subunit RPC1 [OS=Homo sapiens]	0	FALSE	401.786	47	55	140	54	1	1390	155.5	8.48	517.05	55	1	13165.5	12095.1	13412.5	13521.8	12605.9	12164.3		13165.5	13029.6	12963.8	13205.1	14300.6	14299.7	13097.5	13084.5	0.999001	14300.1	1.09182	1	0.587824	FALSE
FALSE	High	Master Protein	P31150	Rab GDP dissociation inhibitor alpha [OS=Homo sapiens]	0	FALSE	401.169	76	33	217	21	1	447	50.6	5.14	730.77	33	0	11283.9	10407.1	21704.3	21169.7	12569.4	11780.3		11283.9	11211.2	20978.1	20673.9	14259.2	13848.2	11247.5	20826	1.85161	14053.7	1.24949	1.5161e-09	0.125859	TRUE
FALSE	High	Master Protein	Q13439-1	Golgin subfamily A member 4 [OS=Homo sapiens]	0	FALSE	400.097	29	65	143	64	1	2230	261	5.39	473.28	65	1	14125.5	12998.7	17078.2	17012.3	19172.3	18459.3		14125.5	14003	16506.8	16613.9	21749.8	21699.7	14064.2	16560.4	1.17748	21724.8	1.54468	0.310177	0.000931905	TRUE
FALSE	High	Master Protein	Q8IWZ3-6	Isoform 6 of Ankyrin repeat and KH domain-containing protein 1 [OS=Homo sapiens]	0	FALSE	399.18	23	53	176	4	1	2617	277	5.86	609.33	53	49	17361.9	16278.7	15814.3	15503.4	18301	17434.1		17361.9	17536.4	15285.2	15140.3	20761.4	20494.5	17449.2	15212.8	0.871834	20628	1.18217	0.20506	0.321773	FALSE
FALSE	High	Master Protein	O94788-1	retinal dehydrogenase 2 [OS=Homo sapiens]	0	FALSE	398.746	73	29	258	26	1	518	56.7	6.05	1063.23	29	3	26374.2	25046.5	27994.5	27797	30026.5	28604.5		26374.2	26981.6	27057.9	27146	34063.2	33625.8	26677.9	27102	1.0159	33844.5	1.26863	0.881528	0.122579	TRUE
FALSE	High	Master Protein	Q06210-1	glutamine--fructose-6-phosphate aminotransferase [isomerizing] 1 [OS=Homo sapiens]	0	FALSE	398.125	67	44	312	44	1	699	78.8	7.11	1065.51	44	0	29256.5	27186.5	36294.3	35610.2	37771.1	35131		29256.5	29287	35080	34776.3	42849	41298	29271.7	34928.1	1.19324	42073.5	1.43734	0.161608	0.00870264	TRUE
FALSE	High	Master Protein	Q92621	Nuclear pore complex protein Nup205 [OS=Homo sapiens]	0	FALSE	397.283	34	53	148	53	1	2012	227.8	6.19	545.26	53	0	18282.2	16854.1	17344.7	17165.4	17023.1	16261.6		18282.2	18156.3	16764.4	16763.4	19311.7	19116.2	18219.2	16763.9	0.920122	19213.9	1.0546	0.43183	0.757624	FALSE
FALSE	High	Master Protein	O60763-1	General vesicular transport factor p115 [OS=Homo sapiens]	0	FALSE	397.184	50	41	186	41	1	962	107.8	4.91	779.34	41	0	18935.2	17414.3	21616.4	21172	18637	17697		18935.2	18759.8	20893.2	20676.2	21142.5	20803.6	18847.5	20784.7	1.10278	20973.1	1.11278	0.446189	0.584525	TRUE
FALSE	High	Master Protein	P36776	Lon protease homolog, mitochondrial [OS=Homo sapiens]	0	FALSE	396.717	47	44	215	44	1	959	106.4	6.39	773.37	44	0	28169	26123.1	26338.6	26869.6	23606.1	23505.8		28169	28141.4	25457.4	26240.4	26779.7	27632.1	28155.2	25848.9	0.918085	27205.9	0.966283	0.435079	0.53361	TRUE
FALSE	High	Master Protein	P22234	multifunctional protein ADE2 [OS=Homo sapiens]	0	FALSE	396.32	73	36	309	36	1	425	47	7.23	1132.38	36	0	40482.2	38759.2	39826.6	39741.5	37266.9	36111.7		40482.2	41753.8	38494.1	38810.8	42277	42450.9	41118	38652.5	0.940038	42363.9	1.0303	0.577484	0.984795	FALSE
FALSE	High	Master Protein	P42166	Lamina-associated polypeptide 2, isoform alpha [OS=Homo sapiens]	0	FALSE	393.873	75	35	166	26	1	694	75.4	7.66	662.68	35	8	21761.2	20274.4	24605.4	24448.6	18854.8	18326.2		21761.2	21840.8	23782.2	23876.1	21389.6	21543.2	21801	23829.1	1.09303	21466.4	0.984653	0.488318	0.663446	FALSE
FALSE	High	Master Protein	P06744	glucose-6-phosphate isomerase [OS=Homo sapiens]	0	FALSE	393.612	57	28	355	21	1	558	63.1	8.32	1285.58	28	8	47922.5	45304.8	54942	55358.5	50825.5	48890.9		47922.5	48805.1	53103.8	54062.1	57658.5	57473.3	48363.8	53583	1.10791	57565.9	1.19027	0.424889	0.29713	TRUE
FALSE	High	Master Protein	Q9ULW0	Targeting protein for Xklp2 [OS=Homo sapiens]	0	FALSE	392.964	49	39	171	39	1	747	85.6	9.23	632.76	39	0	18081.9	16424	16928.7	16748.8	13451.2	12856.3		18081.9	17692.9	16362.3	16356.6	15259.6	15113.1	17887.4	16359.4	0.914578	15186.4	0.848996	0.400178	0.254685	TRUE
FALSE	High	Master Protein	Q9HAV4	exportin-5 [OS=Homo sapiens]	0	FALSE	392.88	42	48	237	48	1	1204	136.2	5.8	786.36	48	0	31970.5	29567.9	31629.8	30797.1	31300.9	29121.7		31970.5	31852.4	30571.6	30075.9	35509	34233.8	31911.4	30323.7	0.950247	34871.4	1.09276	0.650443	0.675457	FALSE
FALSE	High	Master Protein	Q14566	DNA replication licensing factor MCM6 [OS=Homo sapiens]	0	FALSE	391.954	61	49	230	49	1	821	92.8	5.41	806.78	49	0	34130.6	31035.2	31076	30221.3	22479.2	21807.4	Acetyl [N-Term]	34130.6	33433	30036.3	29513.6	25501.3	25635.5	33781.8	29774.9	0.88139	25568.4	0.756869	0.248471	0.00581312	TRUE
FALSE	High	Master Protein	P55265-4	Isoform 4 of Double-stranded RNA-specific adenosine deaminase [OS=Homo sapiens]	0	FALSE	391.199	39	46	178	45	1	1269	140.7	8.56	600.6	46	1	18852.5	16866.5	16887.4	16886.4	15619.4	14988		18852.5	18169.6	16322.4	16490.9	17719.3	17619	18511.1	16406.7	0.886317	17669.1	0.954518	0.261465	0.711047	TRUE
FALSE	High	Master Protein	P23246-1	splicing factor, proline- and glutamine-rich [OS=Homo sapiens]	0	FALSE	391.012	55	37	486	7	1	707	76.1	9.44	1206.61	37	38	27406.1	23846.8	24978.3	25084.7	20558.1	19856		27406.1	25689.2	24142.6	24497.3	23321.9	23341.6	26547.7	24319.9	0.916086	23331.7	0.878863	0.423197	0.130018	TRUE
FALSE	High	Master Protein	P09651-1	Heterogeneous nuclear ribonucleoprotein A1 [OS=Homo sapiens]	0	FALSE	390.731	58	23	603	1	1	372	38.7	9.13	2665.01	23	21	43150.4	41902	41100.2	40911.2	39218.7	39385.2		43150.4	45139.4	39725.1	39953.1	44491.2	46299	44144.9	39839.1	0.902463	45395.1	1.02832	0.347444	0.994909	FALSE
FALSE	High	Master Protein	Q14203-4	Isoform 4 of Dynactin subunit 1 [OS=Homo sapiens]	0	FALSE	390.144	46	46	139	1	1	1253	138.7	5.54	549.15	46	0	185.6	165.2	194	184.4	158	147.8		185.6	177.964	187.509	180.082	179.241	173.745	181.782	183.796	1.01108	176.493	0.970908	0.980211	0.889855	FALSE
FALSE	High	Master Protein	P35998	26S protease regulatory subunit 7 [OS=Homo sapiens]	0	FALSE	388.751	75	40	265	40	1	433	48.6	5.95	813.76	40	0	31826.5	29446.8	32629.6	32433.6	32734.7	31065.4		31826.5	31721.9	31537.9	31674.1	37135.5	36518.7	31774.2	31606	0.994706	36827.1	1.15903	0.999541	0.399395	FALSE
FALSE	High	Master Protein	P19338	Nucleolin [OS=Homo sapiens]	0	FALSE	388.058	43	43	461	43	1	710	76.6	4.7	1614.41	43	0	84474.3	78801.5	75708.5	76375.6	77698.2	77333.2		84474.3	84889.8	73175.6	74587	88143.9	90908.5	84682.1	73881.3	0.872455	89526.2	1.0572	0.213124	0.848376	FALSE
FALSE	High	Master Protein	P46060	Ran GTPase-activating protein 1 [OS=Homo sapiens]	0	FALSE	388.041	63	39	231	39	1	587	63.5	4.68	817.5	39	0	27480.2	24567.9	25512.9	25494.3	24162.8	23304.7		27480.2	26466	24659.3	24897.3	27411.2	27395.7	26973.1	24778.3	0.918629	27403.5	1.01595	0.438342	0.907695	FALSE
FALSE	High	Master Protein	P55786	puromycin-sensitive aminopeptidase [OS=Homo sapiens]	0	FALSE	387.671	49	42	279	42	1	919	103.2	5.72	859.39	42	0	29979.6	27612.2	34567.1	33731.3	31470.6	29624.9		29979.6	29745.6	33410.6	32941.4	35701.5	34825.3	29862.6	33176	1.11096	35263.4	1.18086	0.412552	0.32591	TRUE
FALSE	High	Master Protein	P54136-2	Isoform Monomeric of Arginine--tRNA ligase, cytoplasmic [OS=Homo sapiens]	0	FALSE	386.001	61	37	371	1	1	588	67.1	6.55	1396.45	37	0	493.5	423.6	520.9	518	455.9	431.9		493.5	456.328	503.473	505.869	517.191	507.717	474.914	504.671	1.06266	512.454	1.07905	0.783824	0.615302	TRUE
FALSE	High	Master Protein	P09651-2	Isoform A1-A of Heterogeneous nuclear ribonucleoprotein A1 [OS=Homo sapiens]	0	FALSE	385.917	71	23	603	1	1	320	34.2	9.23	2652.31	23	0	221.1	211.6	226.2	220.8	226.7	201		221.1	227.948	218.632	215.629	257.177	236.284	224.524	217.131	0.96707	246.731	1.0989	0.841767	0.55615	FALSE
FALSE	High	Master Protein	P26196	Probable ATP-dependent RNA helicase DDX6 [OS=Homo sapiens]	0	FALSE	385.785	76	31	298	29	1	483	54.4	8.66	1008.16	31	2	22905.8	21206.6	22782.8	22743.7	18871.5	18028.6		22905.8	22845	22020.6	22211.1	21408.6	21193.4	22875.4	22115.8	0.966794	21301	0.931173	0.77587	0.326811	TRUE
FALSE	High	Master Protein	P07384	Calpain-1 catalytic subunit [OS=Homo sapiens]	0	FALSE	385.643	54	44	182	44	1	714	81.8	5.67	666.35	44	0	22903.1	21145.9	22193.5	21576.4	21184.1	19959.7		22903.1	22779.7	21451	21071.1	24032.1	23463.5	22841.4	21261	0.930813	23747.8	1.03968	0.515064	0.936969	FALSE
FALSE	High	Master Protein	Q15181	Inorganic pyrophosphatase [OS=Homo sapiens]	0	FALSE	385.537	84	28	334	27	1	289	32.6	5.86	1256.95	28	1	44888.3	42409	42305.2	42308.1	40456.3	38802.7		44888.3	45685.6	40889.8	41317.3	45895.2	45614.2	45286.9	41103.6	0.907625	45754.7	1.01033	0.375074	0.86241	FALSE
FALSE	High	Master Protein	Q15459	splicing factor 3A subunit 1 [OS=Homo sapiens]	0	FALSE	385.081	51	36	232	36	1	793	88.8	5.22	859.47	36	0	27957.9	25495.7	27427.6	27389.6	23667.4	23304.8		27957.9	27465.5	26510	26748.2	26849.2	27395.8	27711.7	26629.1	0.960932	27122.5	0.978738	0.730563	0.620261	TRUE
FALSE	High	Master Protein	Q9Y265	RuvB-like 1 [OS=Homo sapiens]	0	FALSE	384.664	65	26	207	26	1	456	50.2	6.42	768.31	26	0	23245.3	21527.6	26605.9	26555.5	17669.6	16824.6		23245.3	23190.8	25715.8	25933.6	20045.1	19778	23218.1	25824.7	1.11227	19911.6	0.857589	0.407298	0.0834549	FALSE
FALSE	High	Master Protein	O75694	nuclear pore complex protein nup155 [OS=Homo sapiens]	0	FALSE	384.457	38	44	197	44	1	1391	155.1	6.16	730.44	44	0	19325	18180.1	18923.5	18440.7	18962.1	18316.4		19325	19584.7	18290.4	18008.8	21511.4	21531.7	19454.9	18149.6	0.932909	21521.5	1.10623	0.510134	0.613642	FALSE
FALSE	High	Master Protein	Q13310-3	Isoform 3 of Polyadenylate-binding protein 4 [OS=Homo sapiens]	0	FALSE	384.363	50	37	357	1	1	660	72.3	9.35	1221.17	37	0	73.9	77.3	80.9	75.8	86.7	73		73.9	83.2723	78.1934	74.0249	98.3559	85.8146	78.5861	76.1091	0.96848	92.0853	1.17177	0.820798	0.355724	FALSE
FALSE	High	Master Protein	Q92841	Probable ATP-dependent RNA helicase DDX17 [OS=Homo sapiens]	0	FALSE	384.275	57	42	266	32	1	729	80.2	8.27	857.18	42	12	37366.1	34510.2	35498	35321.3	29076.5	28614.6		37366.1	37176.5	34310.4	34494.1	32985.5	33637.7	37271.3	34402.2	0.923022	33311.6	0.89376	0.465223	0.173166	TRUE
FALSE	High	Master Protein	P42285	Superkiller viralicidic activity 2-like 2 [OS=Homo sapiens]	0	FALSE	384.057	49	50	151	50	1	1042	117.7	6.52	547.79	50	0	20558.7	19307.6	20377	20091.9	15426.2	15194.9		20558.7	20799.3	19695.3	19621.4	17500.1	17862.3	20679	19658.3	0.950641	17681.2	0.85503	0.629859	0.273474	TRUE
FALSE	High	Master Protein	Q9H4M9	EH domain-containing protein 1 [OS=Homo sapiens]	0	FALSE	384.014	74	43	171	29	1	534	60.6	6.83	636.31	43	15	20194.3	18650.9	20778.1	20860.6	26495.5	24725.9		20194.3	20091.9	20082.9	20372.1	30057.5	29066.4	20143.1	20227.5	1.00419	29561.9	1.4676	0.94699	0.00484591	TRUE
FALSE	High	Master Protein	Q16891-2	Isoform 2 of MICOS complex subunit MIC60 [OS=Homo sapiens]	0	FALSE	383.726	64	43	173	43	1	747	82.6	6.57	666.58	43	0	20997.9	19501.6	24364.7	24955.1	17725.5	17729.6		20997.9	21008.3	23549.5	24370.7	20108.5	20841.9	21003.1	23960.1	1.14079	20475.2	0.974865	0.303102	0.592667	FALSE
FALSE	High	Master Protein	O60506-3	Isoform 3 of Heterogeneous nuclear ribonucleoprotein Q [OS=Homo sapiens]	0	FALSE	383.514	55	33	344	1	1	562	62.6	7.56	1230.96	33	0	117	118.9	120.9	109	123.7	109.9		117	128.086	116.855	106.447	140.33	129.192	122.543	111.651	0.911118	134.761	1.0997	0.642521	0.476229	FALSE
FALSE	High	Master Protein	Q86UP2-1	Kinectin [OS=Homo sapiens]	0	FALSE	382.894	42	55	134	55	1	1357	156.2	5.64	488.3	55	0	18376.7	16510.3	21148.4	20830.5	13566.2	12912.7		18376.7	17785.9	20440.8	20342.7	15390	15179.4	18081.3	20391.8	1.12778	15284.7	0.845334	0.348206	0.243727	FALSE
FALSE	High	Master Protein	P35241-5	Isoform 5 of Radixin [OS=Homo sapiens]	0	FALSE	382.553	55	40	348	22	1	604	71	6.71	982.34	40	0	9496.4	8427.7	10351.3	10234.8	7293.3	6997		9496.4	9078.83	10005	9995.12	8273.81	8225.27	9287.62	10000	1.07671	8249.54	0.88823	0.694447	0.45575	FALSE
FALSE	High	Master Protein	P17844	probable ATP-dependent RNA helicase DDX5 [OS=Homo sapiens]	0	FALSE	381.24	60	42	294	32	1	614	69.1	8.92	907.41	42	0	22559.4	20914.9	23950.5	23879.4	17354.8	17134		22559.4	22530.8	23149.2	23320.2	19688	20141.8	22545.1	23234.7	1.03059	19914.9	0.883334	0.800547	0.141988	FALSE
FALSE	High	Master Protein	O95573	long-chain-fatty-acid--CoA ligase 3 [OS=Homo sapiens]	0	FALSE	380.73	58	34	171	32	1	720	80.4	8.38	652.89	34	2	18380	17430.4	23843.5	23528.3	22527.1	21649.1	Acetyl [N-Term]	18380	18777.1	23045.8	22977.3	25555.6	25449.4	18578.5	23011.5	1.23861	25502.5	1.37269	0.0854974	0.0271176	TRUE
FALSE	High	Master Protein	P20700	Lamin-B1 [OS=Homo sapiens]	0	FALSE	380.602	61	45	201	40	1	586	66.4	5.16	722.31	45	3	26508.3	23539.8	25745.1	25716.7	17422.2	17307		26508.3	25358.5	24883.8	25114.5	19764.4	20345.1	25933.4	24999.1	0.963973	20054.8	0.773318	0.753961	0.00958668	TRUE
FALSE	High	Master Protein	P51812	Ribosomal protein S6 kinase alpha-3 [OS=Homo sapiens]	0	FALSE	380.191	59	34	197	23	1	740	83.7	6.89	661.09	34	13	22338.5	20792.5	30292.7	29207.4	19206.8	18181.7		22338.5	22399	29279.2	28523.4	21789	21373.4	22368.7	28901.3	1.29204	21581.2	0.964792	0.0360414	0.523662	FALSE
FALSE	High	Master Protein	Q99798	Aconitate hydratase, mitochondrial [OS=Homo sapiens]	0	FALSE	379.871	57	41	182	41	1	780	85.4	7.61	609.1	41	0	21343.4	19997.2	24449.4	24732.4	21071.4	21159.5		21343.4	21542.2	23631.4	24153.2	23904.2	24873.9	21442.8	23892.3	1.11423	24389.1	1.1374	0.399488	0.481225	TRUE
FALSE	High	Master Protein	Q8NE71-1	ATP-binding cassette sub-family F member 1 [OS=Homo sapiens]	0	FALSE	379.536	54	39	190	38	1	845	95.9	6.8	700.93	39	1	22064.8	20523.4	21440.8	20543.9	20066.9	18924		22064.8	22109.1	20723.5	20062.8	22764.7	22246	22086.9	20393.1	0.923312	22505.3	1.01894	0.467027	0.931894	FALSE
FALSE	High	Master Protein	Q9UBT2	SUMO-activating enzyme subunit 2 [OS=Homo sapiens]	0	FALSE	379.217	66	37	182	37	1	640	71.2	5.29	679.47	37	0	22893.1	20887.5	22904	22648.1	19709	18770.8		22893.1	22501.3	22137.7	22117.7	22358.7	22065.9	22697.2	22127.7	0.97491	22212.3	0.978635	0.839844	0.619519	TRUE
FALSE	High	Master Protein	Q13435	Splicing factor 3b subunit 2 [OS=Homo sapiens]	0	FALSE	378.701	45	38	220	38	1	895	100.2	5.67	746.51	38	0	24999.1	22827.5	24535.8	24505	23425.2	23087.8		24999.1	24591.2	23714.9	23931.1	26574.5	27140.7	24795.1	23823	0.960794	26857.6	1.08318	0.729508	0.720795	FALSE
FALSE	High	Master Protein	P39023	60S ribosomal protein L3 [OS=Homo sapiens]	0	FALSE	378.605	64	34	389	34	1	403	46.1	10.18	1118.76	34	0	49814.5	43056.2	44754.4	45781.9	40419.1	38808.8		49814.5	46382.8	43257.1	44709.8	45853	45621.4	48098.6	43983.4	0.914442	45737.2	0.950905	0.413576	0.435783	TRUE
FALSE	High	Master Protein	Q7Z2W4	zinc finger CCCH-type antiviral protein 1 [OS=Homo sapiens]	0	FALSE	378.02	53	42	194	20	1	902	101.4	8.4	698.08	42	21	20866.5	19200.7	21581.9	21010	24495.8	22793.3		20866.5	20684.2	20859.8	20518	27789	26794.5	20775.3	20688.9	0.99584	27291.8	1.31366	0.993938	0.0669305	FALSE
FALSE	High	Master Protein	P18583-5	Isoform D of Protein SON [OS=Homo sapiens]	0	FALSE	377.763	26	50	219	11	1	2459	266.9	5.73	765.24	50	39	21474.8	19500.7	23283.3	23220.5	22849.6	22226.8		21474.8	21007.3	22504.3	22676.7	25921.5	26128.6	21241.1	22590.5	1.06353	26025	1.22522	0.627705	0.205421	TRUE
FALSE	High	Master Protein	Q8IWZ3	Ankyrin repeat and KH domain-containing protein 1 [OS=Homo sapiens]	0	FALSE	377.579	23	50	167	1	1	2542	269.3	5.73	581.38	50	0	22.5	24.2	27.2	22.1	22.5	21		22.5	26.0697	26.29	21.5825	25.5249	24.6864	24.2849	23.9362	0.985644	25.1056	1.0338	0.876499	0.734978	FALSE
FALSE	High	Master Protein	Q14203	Dynactin subunit 1 [OS=Homo sapiens]	0	FALSE	376.441	44	46	138	1	1	1278	141.6	5.81	537.68	46	44	16272.1	15023.8	16290	15709.4	11994.9	11459.6		16272.1	16184.6	15745	15341.5	13607.5	13471.3	16228.3	15543.3	0.957785	13539.4	0.834305	0.68127	0.212745	TRUE
FALSE	High	Master Protein	O00267	Transcription elongation factor Spt5 [OS=Homo sapiens]	0	FALSE	375.771	43	40	198	40	1	1087	120.9	5.06	689.03	40	0	28909.9	26948.9	30502	30149	25519.5	24679.2		28909.9	29031	29481.5	29443	28950.3	29011.5	28970.5	29462.2	1.01698	28980.9	1.00036	0.875523	0.783337	TRUE
FALSE	High	Master Protein	Q7L576-1	cytoplasmic FMR1-interacting protein 1 [OS=Homo sapiens]	0	FALSE	374.29	39	48	169	27	1	1253	145.1	6.9	571.93	48	25	19715	18425.1	23459.4	22826.6	13666.8	13133.7		19715	19848.6	22674.5	22292	15504.2	15439.2	19781.8	22483.3	1.13656	15471.7	0.782117	0.317311	0.103912	FALSE
FALSE	High	Master Protein	P30613	Pyruvate kinase PKLR [OS=Homo sapiens]	0	FALSE	373.837	72	38	215	36	1	574	61.8	7.74	841.08	38	0	28470.9	26701.7	31510.2	31214.3	15838.2	15364.2		28470.9	28764.7	30456	30483.3	17967.5	18061.3	28617.8	30469.6	1.06471	18014.4	0.629481	0.621817	0.00618283	FALSE
FALSE	High	Master Protein	Q6PKG0-1	La-related protein 1 [OS=Homo sapiens]	0	FALSE	372.955	53	46	196	41	1	1096	123.4	8.82	657.23	46	6	16508.3	15251.8	23345.5	22737.3	17583.1	16705		16508.3	16430.2	22564.4	22204.8	19947	19637.4	16469.2	22384.6	1.35918	19792.2	1.20177	0.010172	0.218179	TRUE
FALSE	High	Master Protein	P27797	Calreticulin [OS=Homo sapiens]	0	FALSE	372.461	66	26	257	26	1	417	48.1	4.44	992.91	26	0	31404.2	28574	40465.2	39877.4	37968.2	35794.9		31404.2	30781.7	39111.4	38943.5	43072.6	42078.4	31092.9	39027.5	1.25519	42575.5	1.3693	0.0662746	0.0286593	TRUE
FALSE	High	Master Protein	Q13423	NAD(P) transhydrogenase, mitochondrial [OS=Homo sapiens]	0	FALSE	372.226	38	42	226	42	1	1086	113.8	8.09	789.35	42	0	25925.7	24834.5	29778.6	31013.8	22355.6	23073.5		25925.7	26753.2	28782.3	30287.5	25361.1	27123.9	26339.5	29534.9	1.12132	26242.5	0.996318	0.372132	0.751849	FALSE
FALSE	High	Master Protein	Q9P258	Protein RCC2 [OS=Homo sapiens]	0	FALSE	372.22	69	28	272	28	1	522	56	8.78	999.09	28	0	23296.9	21727.2	20684.4	20171.1	17031	16389.2		23296.9	23405.9	19992.4	19698.7	19320.6	19266.2	23351.4	19845.5	0.849866	19293.4	0.826222	0.140223	0.191918	TRUE
FALSE	High	Master Protein	P24928	DNA-directed RNA polymerase II subunit RPB1 [OS=Homo sapiens]	0	FALSE	372.039	35	58	155	58	1	1970	217	7.37	548.51	58	0	19071.2	17153.6	18917.8	19073.1	15873	15491.2		19071.2	18478.9	18284.9	18626.4	18007	18210.6	18775.1	18455.7	0.982988	18108.8	0.964512	0.873219	0.765962	TRUE
FALSE	High	Master Protein	P53992	Protein transport protein sec24c [OS=Homo sapiens]	0	FALSE	371.867	48	39	198	37	1	1094	118.2	7.06	801.21	39	2	18496.4	17279.9	20980.3	20702	18706	17485.5		18496.4	18615	20278.4	20217.2	21220.8	20555	18555.7	20247.8	1.09119	20887.9	1.12569	0.496489	0.529099	TRUE
FALSE	High	Master Protein	P33176	Kinesin-1 heavy chain [OS=Homo sapiens]	0	FALSE	371.289	50	49	169	36	1	963	109.6	6.51	667.62	49	12	20525.5	19599.8	29131.5	28207.4	18416	17564		20525.5	21114.1	28156.9	27546.8	20891.8	20647.2	20819.8	27851.8	1.33776	20769.5	0.997586	0.0155692	0.761683	FALSE
FALSE	High	Master Protein	P40227-1	T-complex protein 1 subunit zeta [OS=Homo sapiens]	0	FALSE	370.748	76	43	430	35	1	531	58	6.68	1527.78	43	9	50987.6	47296.6	52001.4	51830.8	46142.8	43830.7		50987.6	50950.8	50261.6	50617	52346.2	51524.9	50969.2	50439.3	0.989604	51935.5	1.01896	0.958119	0.932024	FALSE
FALSE	High	Master Protein	O00567	Nucleolar protein 56 [OS=Homo sapiens]	0	FALSE	370.698	64	38	164	38	1	594	66	9.19	569.18	38	0	17515.6	16060.9	17432.8	16731.9	15042.3	14778.3		17515.6	17301.8	16849.6	16340.1	17064.6	17372.5	17408.7	16594.8	0.953249	17218.6	0.989078	0.648435	0.90549	TRUE
FALSE	High	Master Protein	Q8N1F7-1	Nuclear pore complex protein Nup93 [OS=Homo sapiens]	0	FALSE	369.305	54	43	233	43	1	819	93.4	5.72	775.32	43	0	30279.3	27787.3	31125.1	30417.6	27231.3	25790.4		30279.3	29934.2	30083.8	29705.3	30892.3	30317.7	30106.7	29894.5	0.992951	30605	1.01655	0.985285	0.912509	FALSE
FALSE	High	Master Protein	Q13576-1	Ras GTPase-activating-like protein IQGAP2 [OS=Homo sapiens]	0	FALSE	368.032	32	52	163	48	1	1575	180.5	5.64	567.86	52	0	18539.7	17263	19093.7	18373.9	16168.2	15044.6		18539.7	18596.8	18454.9	17943.6	18341.8	17685.6	18568.2	18199.3	0.980129	18013.7	0.970136	0.850822	0.797413	TRUE
FALSE	High	Master Protein	Q92922	SWI/SNF complex subunit SMARCC1 [OS=Homo sapiens]	0	FALSE	367.535	40	41	175	33	1	1105	122.8	5.76	664.69	41	8	25547.3	23331.7	26826.4	26840.6	21033.9	20581.7		25547.3	25134.3	25928.9	26212	23861.7	24194.7	25340.8	26070.5	1.02879	24028.2	0.948201	0.810339	0.419719	FALSE
FALSE	High	Master Protein	P43243	Matrin-3 [OS=Homo sapiens]	0	FALSE	367.225	48	41	259	40	1	847	94.6	6.25	852.38	41	1	24105.8	21931.8	25912.2	25964.1	19955.8	19744.4		24105.8	23626.3	25045.3	25356.1	22638.6	23210.4	23866	25200.7	1.05592	22924.5	0.96055	0.666248	0.49589	FALSE
FALSE	High	Master Protein	O43847-2	Isoform 2 of Nardilysin [OS=Homo sapiens]	0	FALSE	367.146	41	45	157	45	1	1218	139.2	5.01	582.49	45	0	22628.1	21010.7	22683.3	21971.5	23382.3	21561		22628.1	22634	21924.4	21457	26525.8	25345.9	22631.1	21690.7	0.958448	25935.8	1.14603	0.71163	0.44753	FALSE
FALSE	High	Master Protein	P48444	Coatomer subunit delta [OS=Homo sapiens]	0	FALSE	367.092	54	34	171	34	1	511	57.2	6.21	603.27	34	0	18991	16987.8	18463.7	18474.8	15936.8	14985.6		18991	18300.3	17846	18042.2	18079.3	17616.2	18645.6	17944.1	0.962372	17847.8	0.957209	0.7151	0.725696	TRUE
FALSE	High	Master Protein	P46063	ATP-dependent DNA helicase Q1 [OS=Homo sapiens]	0	FALSE	366.502	52	31	261	29	1	649	73.4	7.88	893.97	31	1	23433.3	21574.5	25484.1	25121.3	23376.1	22515.5		23433.3	23241.4	24631.5	24533	26518.8	26467.9	23337.3	24582.2	1.05334	26493.4	1.13523	0.679514	0.489897	TRUE
FALSE	High	Master Protein	Q92973-1	transportin-1 [OS=Homo sapiens]	0	FALSE	365.266	53	39	208	29	1	898	102.3	4.98	739.36	39	11	23511.9	21852.3	23221.1	22718.1	22968.3	21673.5		23511.9	23540.6	22444.2	22186.1	26056.1	25478.1	23526.3	22315.1	0.94852	25767.1	1.09525	0.63784	0.663832	FALSE
FALSE	High	Master Protein	P07954	fumarate hydratase, mitochondrial [OS=Homo sapiens]	0	FALSE	364.732	66	27	319	27	1	510	54.6	8.76	1197.83	27	0	35710.4	33097.4	41231.2	41914.3	28983.9	28722.1		35710.4	35654.5	39851.7	40932.7	32880.5	33764.1	35682.5	40392.2	1.13199	33322.3	0.933855	0.333165	0.340487	FALSE
FALSE	High	Master Protein	O75691	Small subunit processome component 20 homolog [OS=Homo sapiens]	0	FALSE	364.729	23	63	153	63	1	2785	318.2	7.39	494.88	63	0	22820.6	21322.9	19928.6	19326.7	12813.4	12550.4		22820.6	22970.3	19261.9	18874.1	14536	14753.5	22895.5	19068	0.832828	14644.8	0.639637	0.0977254	0.00772274	TRUE
FALSE	High	Master Protein	Q9H2M9	Rab3 GTPase-activating protein non-catalytic subunit [OS=Homo sapiens]	0	FALSE	364.49	36	48	184	47	1	1393	155.9	5.62	620.74	48	1	24065.7	22316	26931.9	26809.4	22587	21456.7		24065.7	24040.2	26030.9	26181.6	25623.6	25223.3	24052.9	26106.2	1.08537	25423.4	1.05698	0.522859	0.849506	TRUE
FALSE	High	Master Protein	O75122-3	Isoform 3 of CLIP-associating protein 2 [OS=Homo sapiens]	0	FALSE	364.358	40	53	157	9	1	1515	165.8	8.37	568.69	53	46	20556.3	19215.7	17902.5	17580.4	17620.3	16514.1		20556.3	20700.3	17303.5	17168.7	19989.2	19413	20628.3	17236.1	0.835556	19701.1	0.955051	0.103358	0.713941	TRUE
FALSE	High	Master Protein	Q00341-1	Vigilin [OS=Homo sapiens]	0	FALSE	364.219	39	53	169	52	1	1268	141.4	6.87	603.25	53	0	27874.4	25461.8	26703	26937.6	25837.5	24937.7		27874.4	27429	25809.6	26306.8	29311.1	29315.3	27651.7	26058.2	0.942372	29313.2	1.06009	0.59382	0.833951	FALSE
FALSE	High	Master Protein	Q13509	tubulin beta-3 chain [OS=Homo sapiens]	0	FALSE	364.15	62	26	1142	6	1	450	50.4	4.93	3391.58	26	0	2073.5	1985.3	3454.1	3401.7	2305.1	2198.3		2073.5	2138.69	3338.54	3322.04	2615	2584.2	2106.09	3330.29	1.58126	2599.6	1.23432	0.00165837	0.183405	TRUE
FALSE	High	Master Protein	Q9NTK5-1	obg-like ATPase 1 [OS=Homo sapiens]	0	FALSE	363.518	83	28	284	28	1	396	44.7	7.81	856.16	28	0	35019.2	32534.9	32996.7	32904	31167.1	29287.3		35019.2	35048.6	31892.7	32133.4	35357.2	34428.5	35033.9	32013.1	0.913775	34892.8	0.995974	0.409708	0.749188	TRUE
FALSE	High	Master Protein	O75534-4	Isoform 4 of Cold shock domain-containing protein E1 [OS=Homo sapiens]	0	FALSE	362.533	56	46	170	46	1	844	93.7	6.52	616.82	46	0	26106.3	23935.9	24383.5	24032.8	23556.2	22327.3		26106.3	25785.2	23567.7	23470	26723.1	26246.7	25945.8	23518.9	0.906462	26484.9	1.02078	0.368735	0.946789	FALSE
FALSE	High	Master Protein	O15067	Phosphoribosylformylglycinamidine synthase [OS=Homo sapiens]	0	FALSE	362.002	42	38	177	38	1	1338	144.6	5.76	619.51	38	0	17773.5	16493.9	17591	17301.2	15902.9	15216.3		17773.5	17768.2	17002.5	16896	18040.9	17887.4	17770.9	16949.3	0.953766	17964.1	1.01088	0.652146	0.972503	FALSE
FALSE	High	Master Protein	P30041	Peroxiredoxin-6 [OS=Homo sapiens]	0	FALSE	360.991	75	24	284	24	1	224	25	6.38	1048.85	24	0	43597.2	41588.8	50194	49249.7	40504.8	38930.2		43597.2	44802	48514.7	48096.4	45950.2	45764.1	44199.6	48305.5	1.09289	45857.2	1.0375	0.488908	0.948071	TRUE
FALSE	High	Master Protein	Q12931	heat shock protein 75 kDa, mitochondrial [OS=Homo sapiens]	0	FALSE	360.678	59	40	273	39	1	704	80.1	8.21	833.38	40	0	34551.3	32276.6	35484.5	35905.6	27308.2	27351.5		34551.3	34770.3	34297.3	35064.8	30979.5	32152.9	34660.8	34681	1.00058	31566.2	0.910717	0.967258	0.23437	FALSE
FALSE	High	Master Protein	P04083	annexin A1 [OS=Homo sapiens]	0	FALSE	360.638	74	28	432	28	1	346	38.7	7.02	1589.63	28	0	58073.7	54099.3	52714.4	53132.3	42556.4	40545.7		58073.7	58279.1	50950.8	51888	48277.7	47663.2	58176.4	51419.4	0.883853	47970.4	0.824569	0.258901	0.0386655	TRUE
FALSE	High	Master Protein	P49591	Serine--tRNA ligase, cytoplasmic [OS=Homo sapiens]	0	FALSE	360.349	65	32	196	32	1	514	58.7	6.43	798.52	32	0	22878.7	22019.8	27080.1	27087.3	27161	26207.2		22878.7	23721.1	26174.1	26453	30812.5	30807.7	23299.9	26313.5	1.12934	30810.1	1.32233	0.342584	0.0590803	TRUE
FALSE	High	Master Protein	Q06830	peroxiredoxin-1 [OS=Homo sapiens]	0	FALSE	360.272	80	22	1053	18	1	199	22.1	8.13	3405.4	22	4	100582	100673	103247	103294	90924.2	88570		100582	108451	99792.6	100875	103148	104118	104517	100334	0.959979	103633	0.991543	0.723282	0.71519	TRUE
FALSE	High	Master Protein	Q9Y6G9	Cytoplasmic dynein 1 light intermediate chain 1 [OS=Homo sapiens]	0	FALSE	359.799	66	36	255	35	1	523	56.5	6.42	1074.3	36	1	24220.4	21933	23532	23541.4	24086.6	22817.3		24220.4	23627.6	22744.7	22990.1	27324.8	26822.7	23924	22867.4	0.955836	27073.8	1.13166	0.691918	0.5044	FALSE
FALSE	High	Master Protein	P46013	Proliferation marker protein Ki-67 [OS=Homo sapiens]	0	FALSE	359.297	23	62	160	62	1	3256	358.5	9.45	506.6	62	0	16781.5	15288.4	23242.7	21756	14885.6	14074.6		16781.5	16469.6	22465.1	21246.5	16886.8	16545.3	16625.6	21855.8	1.31459	16716.1	1.00544	0.0241029	0.999674	TRUE
FALSE	High	Master Protein	Q9BQG0-2	Isoform 2 of Myb-binding protein 1A [OS=Homo sapiens]	0	FALSE	358.948	36	46	180	46	1	1332	149.3	9.28	610.44	46	0	22899.7	20761.9	17811.4	17540.5	19470.3	19314.2		22899.7	22366	17215.5	17129.7	22087.9	22704.7	22632.8	17172.6	0.758747	22396.3	0.989547	0.0166556	0.700055	TRUE
FALSE	High	Master Protein	Q9Y3I0	tRNA-splicing ligase RtcB homolog [OS=Homo sapiens]	0	FALSE	358.874	65	32	162	32	1	505	55.2	7.23	577.87	32	0	20392.8	18542.8	21057.7	20686.6	19468.7	18425.7		20392.8	19975.4	20353.2	20202.2	22086.1	21660.2	20184.1	20277.7	1.00463	21873.1	1.08368	0.944497	0.718398	TRUE
FALSE	High	Master Protein	Q6P2E9-1	Enhancer of mRNA-decapping protein 4 [OS=Homo sapiens]	0	FALSE	358.169	38	40	149	40	1	1401	151.6	5.86	556.52	40	0	19747.8	18141.8	16417.6	16335.6	18867.8	17968.2		19747.8	19543.5	15868.3	15953	21404.4	21122.4	19645.6	15910.7	0.809884	21263.4	1.08235	0.0594807	0.724787	FALSE
FALSE	High	Master Protein	O76094	Signal recognition particle subunit SRP72 [OS=Homo sapiens]	0	FALSE	357.686	59	33	172	33	1	671	74.6	9.26	735.73	33	0	18263.9	16895.2	19489.6	18819	18732.7	17834.7		18263.9	18200.5	18837.5	18378.3	21251.1	20965.5	18232.2	18607.9	1.02061	21108.3	1.15775	0.902225	0.403992	TRUE
FALSE	High	Master Protein	Q03701	CCAAT/enhancer-binding protein zeta [OS=Homo sapiens]	0	FALSE	356.714	41	39	137	39	1	1054	120.9	5.94	491.95	39	0	18963.7	17364.2	14562.8	14157.2	14968.5	14699.8		18963.7	18705.8	14075.6	13825.7	16980.9	17280.2	18834.7	13950.6	0.740686	17130.6	0.909519	0.0100467	0.485043	TRUE
FALSE	High	Master Protein	P52948-1	nuclear pore complex protein Nup98-Nup96 [OS=Homo sapiens]	0	FALSE	356.679	33	51	197	51	1	1817	197.5	6.4	661.33	51	0	20324.5	18709.9	19502.8	19465.2	19252	18758.7		20324.5	20155.5	18850.3	19009.4	21840.2	22051.7	20240	18929.8	0.935269	21945.9	1.08429	0.525358	0.715497	FALSE
FALSE	High	Master Protein	Q8IX12	Cell division cycle and apoptosis regulator protein 1 [OS=Homo sapiens]	0	FALSE	356.565	36	37	187	37	1	1150	132.7	5.76	644.01	37	0	21246.3	19411.9	22640.3	22235.6	16361.5	16063.1		21246.3	20911.7	21882.8	21714.9	18561.1	18882.9	21079	21798.9	1.03415	18722	0.888183	0.781188	0.393315	FALSE
FALSE	High	Master Protein	Q15233	Non-POU domain-containing octamer-binding protein [OS=Homo sapiens]	0	FALSE	355.036	64	29	526	27	1	471	54.2	8.95	1720.44	29	1	36397.6	32792.1	35964.3	35636.1	30569.3	30225.5		36397.6	35325.7	34761.1	34801.6	34679	35531.4	35861.6	34781.3	0.969875	35105.2	0.978907	0.800006	0.621475	TRUE
FALSE	High	Master Protein	Q15154-1	Pericentriolar material 1 protein [OS=Homo sapiens]	0	FALSE	354.996	23	44	134	43	1	2024	228.4	5.02	481.75	44	0	13055.7	12134.2	16460.4	16016	11153.7	10705.9		13055.7	13071.7	15909.7	15640.9	12653.2	12585.2	13063.7	15775.3	1.20757	12619.2	0.965976	0.235646	0.774115	FALSE
FALSE	High	Master Protein	O43390-1	heterogeneous nuclear ribonucleoprotein r [OS=Homo sapiens]	0	FALSE	354.015	45	28	316	22	1	633	70.9	8.13	1071.68	28	0	26347.4	24680.1	28378.4	27839.9	24783	24279		26347.4	26586.9	27429	27187.9	28114.8	28541	26467.2	27308.4	1.03179	28327.9	1.0703	0.794019	0.783306	TRUE
FALSE	High	Master Protein	P51532-4	Isoform 4 of Transcription activator BRG1 [OS=Homo sapiens]	0	FALSE	353.751	30	45	156	30	1	1617	181.6	8.07	556.93	45	17	19733.8	17518.7	20934.7	20818.3	16459.1	15888.5		19733.8	18872.2	20234.3	20330.8	18671.9	18677.6	19303	20282.5	1.05074	18674.7	0.967452	0.692994	0.782359	FALSE
FALSE	High	Master Protein	O95373	Importin-7 [OS=Homo sapiens]	0	FALSE	353.298	39	37	177	36	1	1038	119.4	4.82	670.03	37	1	19005.7	17662.2	20722.8	20169.9	19306.3	18175		19005.7	19026.8	20029.5	19697.6	21901.8	21365.5	19016.3	19863.5	1.04455	21633.7	1.13764	0.72548	0.48027	TRUE
FALSE	High	Master Protein	Q96L91	E1A-binding protein p400 [OS=Homo sapiens]	0	FALSE	352.319	23	51	126	49	1	3159	343.3	9.19	494.68	51	3	9108	8402.3	10119.4	9853	7883.5	7647.5	Acetyl [N-Term]	9108	9051.47	9780.84	9622.26	8943.35	8989.96	9079.74	9701.55	1.06848	8966.66	0.987546	0.730797	0.975155	FALSE
FALSE	High	Master Protein	P52209	6-phosphogluconate dehydrogenase, decarboxylating [OS=Homo sapiens]	0	FALSE	352.092	60	29	393	29	1	483	53.1	7.23	1303.35	29	0	45652.3	42505	46019.3	46542.6	36096.6	34799.3		45652.3	45789	44479.7	45452.6	40949.4	40908.1	45720.6	44966.2	0.983498	40928.7	0.895192	0.908706	0.177818	TRUE
FALSE	High	Master Protein	Q9NYU2-1	UDP-glucose:glycoprotein glucosyltransferase 1 [OS=Homo sapiens]	0	FALSE	351.427	37	46	185	44	1	1555	177.1	5.63	598.72	46	2	19501.8	18002.3	21306.5	20668	15997.5	15112.4		19501.8	19393.2	20593.7	20184	18148.2	17765.3	19447.5	20388.8	1.0484	17956.7	0.923345	0.705217	0.550166	FALSE
FALSE	High	Master Protein	P08243-1	Asparagine synthetase [glutamine-hydrolyzing] [OS=Homo sapiens]	0	FALSE	351.363	65	31	289	31	1	561	64.3	6.86	903.65	31	0	31723.7	29188.5	21175.4	21532.8	31164.9	29872.2		31723.7	31443.6	20466.9	21028.5	35354.7	35116.1	31583.7	20747.7	0.656914	35235.4	1.11562	0.000583641	0.572096	FALSE
FALSE	High	Master Protein	Q05639	Elongation factor 1-alpha 2 [OS=Homo sapiens]	0	FALSE	351.304	62	23	1580	10	1	463	50.4	9.03	6383.08	23	0	4802.7	4483.3	7128.2	6958.8	4393.1	4323.6		4802.7	4829.69	6889.72	6795.84	4983.71	5082.58	4816.19	6842.78	1.42079	5033.14	1.04505	0.0439415	0.737604	TRUE
FALSE	High	Master Protein	Q13310-2	Isoform 2 of Polyadenylate-binding protein 4 [OS=Homo sapiens]	0	FALSE	349.284	49	37	351	1	1	631	69.5	9.52	1180.54	37	26	25571.1	23450	24764	24801.8	23842.9	22452.9		25571.1	25261.8	23935.5	24221	27048.3	26394.3	25416.4	24078.2	0.947349	26721.3	1.05134	0.629348	0.877866	FALSE
FALSE	High	Master Protein	O00231	26S proteasome non-ATPase regulatory subunit 11 [OS=Homo sapiens]	0	FALSE	348.823	67	31	204	31	1	422	47.4	6.48	699.94	31	0	30579.8	27931.1	31161.6	30868.8	27269.7	25827		30579.8	30089.1	30119	30145.9	30935.8	30360.7	30334.4	30132.5	0.993342	30648.3	1.01035	0.98846	0.862542	FALSE
FALSE	High	Master Protein	O60313-2	Isoform 2 of Dynamin-like 120 kDa protein, mitochondrial [OS=Homo sapiens]	0	FALSE	348.708	48	47	145	47	1	997	115.8	7.87	505.47	47	0	17124	16078.2	21891.2	21814.5	16457.5	16075.6		17124	17320.4	21158.8	21303.6	18670	18897.6	17222.2	21231.2	1.23278	18783.8	1.09067	0.0932398	0.592785	TRUE
FALSE	High	Master Protein	P17980	26S protease regulatory subunit 6A [OS=Homo sapiens]	0	FALSE	346.656	69	30	214	30	1	439	49.2	5.24	767.42	30	0	25634	23541.2	26555.9	26395.5	23815.9	22430		25634	25360	25667.4	25777.4	27017.7	26367.4	25497	25722.4	1.00884	26692.6	1.04689	0.920922	0.900368	TRUE
FALSE	High	Master Protein	O00429	Dynamin-1-like protein [OS=Homo sapiens]	0	FALSE	346.564	73	43	140	2	1	736	81.8	6.81	529.53	43	43	21959.4	19883.5	24518.7	24095.5	21747.3	20576.6		21959.4	21419.7	23698.4	23531.2	24671	24188.7	21689.6	23614.8	1.08876	24429.8	1.12634	0.507387	0.526365	TRUE
FALSE	High	Master Protein	Q8TEQ6	gem-associated protein 5 [OS=Homo sapiens]	0	FALSE	346.475	38	47	160	47	1	1508	168.5	6.62	522.78	47	0	17461.9	16331.6	14540.3	14344.4	13642.7	13040.8		17461.9	17593.4	14053.8	14008.5	15476.8	15330	17527.7	14031.2	0.800515	15403.4	0.878807	0.0479302	0.356575	TRUE
FALSE	High	Master Protein	Q99996-6	Isoform 6 of A-kinase anchor protein 9 [OS=Homo sapiens]	0	FALSE	346.353	19	67	113	65	1	3929	455.1	4.98	395.72	67	2	15108.2	13990.9	17105.5	16638.9	11849.8	11413.1		15108.2	15071.9	16533.2	16249.2	13442.9	13416.6	15090	16391.2	1.08623	13429.7	0.889974	0.619901	0.400588	FALSE
FALSE	High	Master Protein	P12277	Creatine kinase B-type [OS=Homo sapiens]	0	FALSE	346.232	84	23	246	22	1	381	42.6	5.59	924.6	23	1	27290.5	25424.9	31985.4	31230.9	24401.4	23621.1		27290.5	27389.3	30915.3	30499.5	27681.9	27767.6	27339.9	30707.4	1.12317	27724.8	1.01408	0.365164	0.892547	TRUE
FALSE	High	Master Protein	O43776	Asparagine--tRNA ligase, cytoplasmic [OS=Homo sapiens]	0	FALSE	346.143	50	29	200	29	1	548	62.9	6.25	677.37	29	0	26350.6	24308.1	25708.9	25347.4	15193.8	14428		26350.6	26186.2	24848.8	24753.8	17236.4	16960.7	26268.4	24801.3	0.94415	17098.6	0.650919	0.606405	0.0098292	TRUE
FALSE	High	Master Protein	Q9BSJ8-2	Isoform 2 of Extended synaptotagmin-1 [OS=Homo sapiens]	0	FALSE	345.874	40	45	160	1	1	1114	123.9	5.78	601.54	45	0	31.9	36.9	46.4	46.7	46.9	45.8		31.9	39.7509	44.8476	45.6064	53.2052	53.8399	35.8255	45.227	1.26243	53.5225	1.49398	0.3623	0.0220375	TRUE
FALSE	High	Master Protein	Q9UKV8	Protein argonaute-2 [OS=Homo sapiens]	0	FALSE	345.166	51	39	145	30	1	859	97.1	9.19	524.62	39	9	16254.2	14792.3	11880	11733.2	17186.2	16218.7		16254.2	15935.2	11482.5	11458.4	19496.7	19065.8	16094.7	11470.5	0.712688	19281.2	1.19799	0.016598	0.227169	FALSE
FALSE	High	Master Protein	Q709C8	Vacuolar protein sorting-associated protein 13C [OS=Homo sapiens]	0	FALSE	344.849	20	68	131	67	1	3753	422.1	6.83	420.14	68	1	15034.7	13942.6	19399.8	18850.8	15126.9	14331.6		15034.7	15019.8	18750.8	18409.3	17160.6	16847.4	15027.3	18580	1.23642	17004	1.13154	0.177013	0.428908	TRUE
FALSE	High	Master Protein	O95163	Elongator complex protein 1 [OS=Homo sapiens]	0	FALSE	344.816	35	36	125	36	1	1332	150.2	5.94	477.79	36	0	17791.3	16728.6	16495.8	15898.2	15367.8	14575.8		17791.3	18021.1	15943.9	15525.9	17433.8	17134.5	17906.2	15734.9	0.878741	17284.2	0.965262	0.230747	0.770135	TRUE
FALSE	High	Master Protein	Q13177	Serine/threonine-protein kinase PAK 2 [OS=Homo sapiens]	0	FALSE	344.708	61	31	196	24	1	524	58	5.96	760.32	31	9	26189.2	24202.7	24656.1	24329.1	21726.5	20925.5		26189.2	26072.6	23831.2	23759.4	24647.4	24598.8	26130.9	23795.3	0.910618	24623.1	0.942298	0.391695	0.385885	TRUE
FALSE	High	Master Protein	P27824-2	Isoform 2 of Calnexin [OS=Homo sapiens]	0	FALSE	344.171	45	34	201	33	1	627	71.5	4.7	695.3	34	1	23760	22152	29660.3	29776.7	25854.3	24853.1		23760	23863.5	28668	29079.4	29330.1	29215.9	23811.7	28873.7	1.21258	29273	1.22935	0.124515	0.19612	TRUE
FALSE	High	Master Protein	Q08378	Golgin subfamily A member 3 [OS=Homo sapiens]	0	FALSE	343.502	38	46	111	46	1	1498	167.3	5.44	430.76	46	0	11361.3	10532	13466.1	13233.9	13759.4	13024.1		11361.3	11345.7	13015.6	12924	15609.2	15310.4	11353.5	12969.8	1.14236	15459.8	1.36168	0.414987	0.0254813	TRUE
FALSE	High	Master Protein	Q16222-2	Isoform AGX1 of UDP-N-acetylhexosamine pyrophosphorylase [OS=Homo sapiens]	0	FALSE	342.403	58	30	147	28	1	505	57	6.38	547.08	30	2	18052.5	16881.2	18585	18559.9	16786.1	16037.9		18052.5	18185.5	17963.2	18125.3	19042.8	18853.2	18119	18044.2	0.995875	18948	1.04576	0.975148	0.800137	FALSE
FALSE	High	Master Protein	Q9BUF5	Tubulin beta-6 chain [OS=Homo sapiens]	0	FALSE	342.158	84	30	703	15	1	446	49.8	4.88	1955.45	30	4	15002.2	14107.8	17392.1	17049.5	14339.2	13688.7		15002.2	15197.8	16810.2	16650.2	16267	16091.7	15100	16730.2	1.10796	16179.3	1.07148	0.535542	0.678545	TRUE
FALSE	High	Master Protein	Q8WUM0	Nuclear pore complex protein Nup133 [OS=Homo sapiens]	0	FALSE	341.541	41	41	123	41	1	1156	128.9	5.1	510.46	41	0	14948.7	13953.9	14683.4	14168.4	13726.9	13260.7		14948.7	15032	14192.1	13836.6	15572.3	15588.5	14990.3	14014.4	0.934893	15580.4	1.03936	0.522914	0.831254	FALSE
FALSE	High	Master Protein	Q9NSE4	Isoleucine--tRNA ligase, mitochondrial [OS=Homo sapiens]	0	FALSE	341.485	45	38	164	38	1	1012	113.7	7.2	529.5	38	0	18194.2	17173.9	20940	21024.3	14629.2	14658.8		18194.2	18500.8	20239.4	20531.9	16595.9	17232	18347.5	20385.7	1.11109	16914	0.92187	0.412016	0.543019	FALSE
FALSE	High	Master Protein	Q9NTI5	Sister chromatid cohesion protein PDS5 homolog B [OS=Homo sapiens]	0	FALSE	341.378	33	49	142	43	1	1447	164.6	8.47	462.77	49	0	13247.4	12036.7	15819.5	15055	9655.6	9439.1		13247.4	12966.7	15290.2	14702.4	10953.7	11096.1	13107	14996.3	1.14414	11024.9	0.841142	0.409201	0.261355	FALSE
FALSE	High	Master Protein	O00571	ATP-dependent RNA helicase DDX3X [OS=Homo sapiens]	0	FALSE	341.168	63	42	251	41	1	662	73.2	7.18	816.78	42	0	31099.9	28225.3	29038.1	28682.7	28086.6	26590.5		31099.9	30406	28066.6	28011	31862.5	31258.3	30753	28038.8	0.911743	31560.4	1.02626	0.398059	0.991315	FALSE
FALSE	High	Master Protein	Q9BSJ8	Extended synaptotagmin-1 [OS=Homo sapiens]	0	FALSE	340.702	39	45	164	1	1	1104	122.8	5.83	608.03	45	45	19971.3	18204.1	20589.5	20868.7	21726.5	21026.4		19971.3	19610.6	19900.6	20380	24647.4	24717.4	19790.9	20140.3	1.01765	24682.4	1.24716	0.871754	0.159542	TRUE
FALSE	High	Master Protein	O00203-1	AP-3 complex subunit beta-1 [OS=Homo sapiens]	0	FALSE	340.014	43	49	168	48	1	1094	121.2	6.04	523.97	49	1	23865.3	21555	22825.7	22671.8	20921.9	19829.8		23865.3	23220.4	22062	22140.9	23734.6	23310.8	23542.8	22101.4	0.938776	23522.7	0.999145	0.568738	0.77383	TRUE
FALSE	High	Master Protein	O00429-4	Isoform 3 of Dynamin-1-like protein [OS=Homo sapiens]	0	FALSE	339.759	73	43	139	2	1	699	78.1	6.81	524.51	43	0	818.3	740.4	791.4	768.5	969.3	911.9		818.3	797.604	764.923	750.503	1099.61	1071.98	807.952	757.713	0.937819	1085.79	1.34389	0.628147	0.111687	FALSE
FALSE	High	Master Protein	P50454	Serpin H1 [OS=Homo sapiens]	0	FALSE	339.288	53	21	191	21	1	418	46.4	8.69	663.26	21	0	20480.1	18824.1	17613.2	17448.7	15811.8	15050.8		20480.1	20278.5	17023.9	17040.1	17937.5	17692.9	20379.3	17032	0.835751	17815.2	0.874181	0.103768	0.339274	TRUE
FALSE	High	Master Protein	P62495	Eukaryotic peptide chain release factor subunit 1 [OS=Homo sapiens]	0	FALSE	339.252	62	29	199	29	1	437	49	5.71	797.35	29	0	30756.5	28678.4	21747.2	21407.4	30623.2	28985.2		30756.5	30894.1	21019.6	20906.1	34740.2	34073.3	30825.3	20962.8	0.680053	34406.8	1.11619	0.00135739	0.569639	FALSE
FALSE	High	Master Protein	P07195	L-lactate dehydrogenase B chain [OS=Homo sapiens]	0	FALSE	338.658	69	24	617	22	1	334	36.6	6.05	1851.96	24	0	72523.4	66694.1	69728.7	69962.6	53390.3	51870.1		72523.4	71847	67395.8	68324.2	60568.1	60975.5	72185.2	67860	0.940082	60771.8	0.841887	0.57779	0.0586096	TRUE
FALSE	High	Master Protein	P49750-4	Isoform 4 of YLP motif-containing protein 1 [OS=Homo sapiens]	0	FALSE	338.624	27	45	145	45	1	2146	241.5	6.55	487.02	45	0	15150.8	13342	15681.7	15531	11582.7	11271.5		15150.8	14372.8	15157	15167.3	13139.9	13250.1	14761.8	15162.2	1.02712	13195	0.893861	0.872963	0.416641	FALSE
FALSE	High	Master Protein	Q6WKZ4-4	Rab11 family-interacting protein 1 [OS=Homo sapiens]	0	FALSE	337.113	34	34	147	32	1	1283	137.1	5.43	512.95	34	4	12106.1	11063.7	13400.3	13442.2	17985.7	17406.2		12106.1	11918.5	12952	13127.4	20403.7	20461.7	12012.3	13039.7	1.08553	20432.7	1.70098	0.622716	1.6294e-05	TRUE
FALSE	High	Master Protein	P26641-2	Isoform 2 of Elongation factor 1-gamma [OS=Homo sapiens]	0	FALSE	336.348	65	30	500	30	1	487	56.1	7.72	1592.07	30	0	52856.4	49472.5	48380.9	48112.2	50430.8	48347.3		52856.4	53294.8	46762.2	46985.5	57210.7	56834.3	53075.6	46873.9	0.883153	57022.5	1.07436	0.255905	0.763423	FALSE
FALSE	High	Master Protein	P49748-3	Isoform 3 of Very long-chain specific acyl-CoA dehydrogenase, mitochondrial [OS=Homo sapiens]	0	FALSE	336.165	59	35	215	35	1	678	72.9	8.75	684.74	35	0	21808	21010.3	31339.6	31342.9	17313.1	17308.5		21808	22633.6	30291.1	30608.9	19640.7	20346.9	22220.8	30450	1.37034	19993.8	0.899778	0.00808201	0.19335	FALSE
FALSE	High	Master Protein	A2RRP1-1	neuroblastoma-amplified sequence [OS=Homo sapiens]	0	FALSE	335.901	25	56	144	56	1	2371	268.4	5.96	490.32	56	0	21047.5	19370.1	22468.4	22151.7	16446.2	15745.7		21047.5	20866.7	21716.7	21632.9	18657.2	18509.7	20957.1	21674.8	1.03425	18583.5	0.88674	0.780662	0.387518	FALSE
FALSE	High	Master Protein	P25705-1	ATP synthase subunit alpha, mitochondrial [OS=Homo sapiens]	0	FALSE	335.509	68	36	338	36	1	553	59.7	9.13	1169.68	36	0	37192.6	36379.2	45143.2	45252.9	34559.3	35007.9		37192.6	39189.9	43632.9	44193.2	39205.4	41153.3	38191.3	43913	1.14982	40179.4	1.05206	0.274182	0.874255	TRUE
FALSE	High	Master Protein	P28838	cytosol aminopeptidase [OS=Homo sapiens]	0	FALSE	334.754	70	34	218	34	1	519	56.1	7.93	867.75	34	0	30394.7	28391.6	30682.1	30011.3	25584.4	24381.9		30394.7	30585.2	29655.6	29308.5	29024	28662	30489.9	29482	0.966943	28843	0.945983	0.777034	0.406808	TRUE
FALSE	High	Master Protein	Q13620-1	Isoform 2 of Cullin-4B [OS=Homo sapiens]	0	FALSE	334.429	51	53	173	36	1	895	102.2	7.94	571.63	53	17	23435.3	21343.2	28281.6	27603.9	23486.8	22274.6		23435.3	22992.2	27335.4	26957.5	26644.4	26184.7	23213.8	27146.4	1.16941	26414.5	1.13788	0.218078	0.479304	TRUE
FALSE	High	Master Protein	P14735	insulin-degrading enzyme [OS=Homo sapiens]	0	FALSE	334.332	44	42	153	42	1	1019	117.9	6.61	533.97	42	0	21359.2	19760	21479.4	20843	21343.9	20129.7		21359.2	21286.7	20760.8	20354.9	24213.4	23663.3	21322.9	20557.8	0.964118	23938.3	1.12266	0.755083	0.541867	FALSE
FALSE	High	Master Protein	P55084	Trifunctional enzyme subunit beta, mitochondrial [OS=Homo sapiens]	0	FALSE	334.183	65	32	218	31	1	474	51.3	9.41	721.91	32	1	27386	25006.2	27354.6	28312.6	24040.5	24174.1		27386	26938.2	26439.4	27649.6	27272.5	28417.7	27162.1	27044.5	0.99567	27845.1	1.02514	0.994896	0.982275	FALSE
FALSE	High	Master Protein	P41250	Glycine--tRNA ligase [OS=Homo sapiens]	0	FALSE	333.897	57	38	269	37	1	739	83.1	7.03	779.51	38	1	38827.7	35890.9	37726.7	38090.9	33691.5	32197.2		38827.7	38663.9	36464.5	37198.9	38221	37849.2	38745.8	36831.7	0.950598	38035.1	0.981657	0.653023	0.641421	TRUE
FALSE	High	Master Protein	P05771-2	Isoform Beta-II of Protein kinase C beta type [OS=Homo sapiens]	0	FALSE	333.775	60	36	181	25	1	673	77	7.02	665.67	36	12	41321.2	36173.2	47032.9	47050.5	33013.2	31147.9		41321.2	38968	45459.3	45948.7	37451.5	36615.7	40144.6	45704	1.13848	37033.6	0.922505	0.310797	0.285089	FALSE
FALSE	High	Master Protein	P61011-1	signal recognition particle 54 kDa protein [OS=Homo sapiens]	0	FALSE	333.69	59	32	159	32	1	504	55.7	8.75	547.01	32	0	21828.3	19245.9	22734.6	22527.8	22950.5	21771.4		21828.3	20732.9	21974	22000.2	26036	25593.2	21280.6	21987.1	1.0332	25814.6	1.21306	0.786337	0.234665	TRUE
FALSE	High	Master Protein	P00338-3	Isoform 3 of L-lactate dehydrogenase A chain [OS=Homo sapiens]	0	FALSE	333.081	72	32	517	29	1	361	39.8	8.43	1430	32	3	61024.5	56867	57901.3	58177.2	49500.9	47368.3		61024.5	61260.6	55964.1	56814.8	56155.8	55683.5	61142.6	56389.5	0.922262	55919.6	0.914578	0.460505	0.250226	TRUE
FALSE	High	Master Protein	Q8NF50-1	Dedicator of cytokinesis protein 8 [OS=Homo sapiens]	0	FALSE	332.484	27	51	130	49	1	2099	238.4	6.87	454.16	51	2	16149.9	14845.6	18025.7	17769.7	12218.3	11672.9		16149.9	15992.6	17422.6	17353.6	13860.9	13722	16071.2	17388.1	1.08194	13791.5	0.858145	0.637218	0.283538	FALSE
FALSE	High	Master Protein	Q92974	Rho guanine nucleotide exchange factor 2 [OS=Homo sapiens]	0	FALSE	332.289	46	46	128	46	1	986	111.5	7.27	478.65	46	0	12722.9	11697	13598.7	13336.8	11046.4	10725.9		12722.9	12600.7	13143.7	13024.5	12531.5	12608.8	12661.8	13084.1	1.03335	12570.1	0.992758	0.84514	0.926757	FALSE
FALSE	High	Master Protein	Q7Z478	ATP-dependent RNA helicase Dhx29 [OS=Homo sapiens]	0	FALSE	330.404	34	43	152	42	1	1369	155.1	8.09	522.6	43	1	14113.1	12924.5	14414.2	14051.2	12834.6	12221.4		14113.1	13923.1	13932	13722.1	14560.1	14366.8	14018.1	13827	0.986372	14463.4	1.03177	0.899853	0.868571	FALSE
FALSE	High	Master Protein	P61221	ATP-binding cassette sub-family E member 1 [OS=Homo sapiens]	0	FALSE	330.258	64	35	244	35	1	599	67.3	8.34	926.09	35	0	30761.4	28786.2	30324.6	30604.1	26758.4	25607.9		30761.4	31010.3	29310	29887.4	30355.8	30103.2	30885.8	29598.7	0.958327	30229.5	0.978749	0.710716	0.620341	TRUE
FALSE	High	Master Protein	P28331-2	Isoform 2 of NADH-ubiquinone oxidoreductase 75 kDa subunit, mitochondrial [OS=Homo sapiens]	0	FALSE	329.537	69	38	161	38	1	741	80.9	6.64	574.87	38	0	22583.5	21327	25388.7	25609.5	19205.3	18963.2		22583.5	22974.8	24539.3	25009.8	21787.2	22292.1	22779.1	24774.5	1.0876	22039.7	0.967537	0.512668	0.542054	FALSE
FALSE	High	Master Protein	P27694	Replication protein A 70 kDa DNA-binding subunit [OS=Homo sapiens]	0	FALSE	328.834	54	29	147	29	1	616	68.1	7.21	539.64	29	0	21542.1	19841.9	24783.3	24272.6	16950.4	16268.6		21542.1	21374.9	23954.1	23704.2	19229.2	19124.4	21458.5	23829.2	1.11048	19176.8	0.89367	0.414482	0.415844	FALSE
FALSE	High	Master Protein	Q8WWM7-1	ataxin-2-like protein [OS=Homo sapiens]	0	FALSE	328.72	52	47	124	46	1	1075	113.3	8.59	434.05	47	1	18753.7	16873.2	17654.5	17771.5	17931.3	16901.3	Acetyl [N-Term]	18753.7	18176.8	17063.8	17355.3	20342	19868.2	18465.3	17209.6	0.931997	20105.1	1.08881	0.504314	0.694028	FALSE
FALSE	High	Master Protein	O60306	Intron-binding protein aquarius [OS=Homo sapiens]	0	FALSE	328.567	33	45	114	44	1	1485	171.2	6.37	421.92	45	1	10919.4	10029.2	10328.8	10009.7	9624.2	9125.9		10919.4	10804.1	9983.23	9775.29	10918.1	10727.9	10861.7	9879.26	0.909547	10823	0.996432	0.416917	0.939814	TRUE
FALSE	High	Master Protein	P09972	Fructose-bisphosphate aldolase C [OS=Homo sapiens]	0	FALSE	328.295	88	31	191	24	1	364	39.4	6.87	830.17	31	0	14045.5	13879	19719.8	19192.8	14363.5	13838.8		14045.5	14951.3	19060	18743.3	16294.5	16268.1	14498.4	18901.7	1.30371	16281.3	1.12297	0.0831664	0.460922	TRUE
FALSE	High	Master Protein	Q9UPU5	Ubiquitin carboxyl-terminal hydrolase 24 [OS=Homo sapiens]	0	FALSE	327.395	25	58	125	57	1	2620	294.2	6.14	421.92	58	0	14425.7	13323	17279.2	16990.1	11963.2	11452.4		14425.7	14352.4	16701.1	16592.2	13571.5	13462.8	14389	16646.7	1.1569	13517.2	0.939407	0.369275	0.630862	FALSE
FALSE	High	Master Protein	P30153	serine/threonine-protein phosphatase 2A 65 kDa regulatory subunit A alpha isoform [OS=Homo sapiens]	0	FALSE	327.365	59	30	245	23	1	589	65.3	5.11	755.54	30	8	27689.3	25253.3	25215.3	25155.9	23611.1	22668.9		27689.3	27204.4	24371.7	24566.8	26785.4	26648.3	27446.9	24469.2	0.891513	26716.8	0.973402	0.293251	0.582386	TRUE
FALSE	High	Master Protein	P35606	Coatomer subunit beta' [OS=Homo sapiens]	0	FALSE	327.064	55	41	131	41	1	906	102.4	5.27	493.93	41	0	18439	16992.7	19083.4	18758.3	16006.1	15083		18439	18305.6	18444.9	18319	18158	17730.7	18372.3	18382	1.00053	17944.3	0.976706	0.993075	0.834574	FALSE
FALSE	High	Master Protein	O60271	C-jun-amino-terminal kinase-interacting protein 4 [OS=Homo sapiens]	0	FALSE	326.695	44	50	133	44	1	1321	146.1	5.15	458.59	50	6	16433.4	14670.5	18875.9	19018.1	20400.3	19276.7		16433.4	15804	18244.4	18572.7	23142.9	22660.6	16118.7	18408.6	1.14206	22901.7	1.42082	0.415949	0.0118091	TRUE
FALSE	High	Master Protein	P09429	High mobility group protein B1 [OS=Homo sapiens]	0	FALSE	326.387	70	22	498	20	1	215	24.9	5.74	1605.87	22	3	53860.8	48902.6	51571.2	53327.8	33608.7	32924		53860.8	52680.9	49845.8	52079	38127	38703.6	53270.8	50962.4	0.956666	38415.3	0.721132	0.69816	0.00179264	TRUE
FALSE	High	Master Protein	Q92797-1	Symplekin [OS=Homo sapiens]	0	FALSE	325.545	39	43	135	43	1	1274	141.1	6.13	485.44	43	0	18492.1	16838.7	17401.1	17079.5	14827.8	14310.7		18492.1	18139.7	16818.9	16679.5	16821.2	16822.8	18315.9	16749.2	0.914464	16822	0.91844	0.39954	0.526579	TRUE
FALSE	High	Master Protein	Q13451-1	Peptidyl-prolyl cis-trans isomerase FKBP5 [OS=Homo sapiens]	0	FALSE	325.476	63	32	234	31	1	457	51.2	5.9	711.54	32	0	30895.8	27987.3	32993.9	32759.5	19316.2	18575.3		30895.8	30149.6	31890	31992.3	21913.1	21836.1	30522.7	31941.2	1.04647	21874.6	0.716665	0.715361	0.00153411	FALSE
FALSE	High	Master Protein	Q9H0D6-1	5'-3' exoribonuclease 2 [OS=Homo sapiens]	0	FALSE	324.667	53	41	138	41	1	950	108.5	7.47	548.05	41	0	14689.8	13364.3	14931.4	14573.6	10458.5	10213		14689.8	14396.8	14431.8	14232.3	11864.5	12005.8	14543.3	14332.1	0.985475	11935.2	0.820664	0.892778	0.178493	TRUE
FALSE	High	Master Protein	Q15058	Kinesin-like protein KIF14 [OS=Homo sapiens]	0	FALSE	324.643	35	48	129	48	1	1648	186.4	7.91	449.43	48	0	13037.1	12131.9	13398.1	12941.7	9657.5	9110.3		13037.1	13069.2	12949.8	12638.6	10955.8	10709.5	13053.2	12794.2	0.980164	10832.7	0.829891	0.851097	0.224993	TRUE
FALSE	High	Master Protein	Q8NI27-1	THO complex subunit 2 [OS=Homo sapiens]	0	FALSE	324.352	28	41	132	41	1	1593	182.7	8.44	475.78	41	0	16543.7	14712.7	14713	14550.4	12848.8	12423.4		16543.7	15849.4	14220.8	14209.7	14576.2	14604.2	16196.6	14215.2	0.877668	14590.2	0.900822	0.226613	0.446322	TRUE
FALSE	High	Master Protein	Q9Y678	Coatomer subunit gamma-1 [OS=Homo sapiens]	0	FALSE	323.885	56	41	164	37	1	874	97.7	5.47	574.06	41	5	18854.1	17290.6	16921.8	16881.5	15932.8	15055.9		18854.1	18626.5	16355.7	16486.2	18074.8	17698.9	18740.3	16420.9	0.876235	17886.8	0.954458	0.221176	0.710719	TRUE
FALSE	High	Master Protein	P42229	Signal transducer and activator of transcription 5A [OS=Homo sapiens]	0	FALSE	323.779	44	31	172	11	1	794	90.6	6.39	612.4	31	21	22044.9	19776.7	16808.9	17056.4	13224.5	12669.1		22044.9	21304.7	16246.5	16657	15002.4	14893.1	21674.8	16451.8	0.759027	14947.7	0.689637	0.0167826	0.0214613	TRUE
FALSE	High	Master Protein	Q9NUU7	ATP-dependent RNA helicase DDX19A [OS=Homo sapiens]	0	FALSE	323.484	65	29	201	6	1	478	53.9	6.58	639.46	29	25	22086.1	20106.7	20220.1	20243.2	19595.4	18725.5		22086.1	21660.2	19543.6	19769.1	22229.8	22012.6	21873.1	19656.4	0.898654	22121.2	1.01134	0.317311	0.87053	FALSE
FALSE	High	Master Protein	P05783	Keratin, type I cytoskeletal 18 [OS=Homo sapiens]	0	FALSE	323.285	73	29	288	21	1	430	48	5.45	1169.51	29	5	20585.2	19204.5	20525.3	20003.4	20039.2	19361		20585.2	20688.3	19838.6	19535	22733.3	22759.7	20636.7	19686.8	0.953968	22746.5	1.10223	0.653595	0.631721	FALSE
FALSE	High	Master Protein	Q9Y5K6	CD2-associated protein [OS=Homo sapiens]	0	FALSE	322.98	52	36	195	36	1	639	71.4	6.4	676.16	36	0	24586.7	22310	26759.5	26774.7	18557.9	17456.8		24586.7	24033.7	25864.2	26147.7	21052.8	20521.2	24310.2	26006	1.06975	20787	0.855074	0.596905	0.0789804	FALSE
FALSE	High	Master Protein	P20810-6	Isoform 6 of Calpastatin [OS=Homo sapiens]	0	FALSE	322.642	49	34	114	34	1	791	84.9	5.36	491.12	34	0	12760.8	11429.6	16662	16880.6	11157.7	10336.4		12760.8	12312.7	16104.5	16485.3	12657.7	12150.9	12536.7	16294.9	1.29977	12404.3	0.989437	0.0872235	0.907563	FALSE
FALSE	High	Master Protein	P63244	Receptor of activated protein C kinase 1 [OS=Homo sapiens]	0	FALSE	322.263	82	24	405	24	1	317	35.1	7.69	1520.2	24	0	47819.6	47296.8	49769.4	48727.6	44269	43196.1		47819.6	50951	48104.3	47586.5	50220.5	50778.9	49385.3	47845.4	0.968818	50499.7	1.02256	0.791703	0.961297	FALSE
FALSE	High	Master Protein	Q8TAQ2	SWI/SNF complex subunit SMARCC2 [OS=Homo sapiens]	0	FALSE	322.207	37	37	159	2	1	1214	132.8	5.69	581.65	37	29	14081.5	12703.1	13589.3	13672.5	10885.1	10703		14081.5	13684.6	13134.6	13352.3	12348.5	12581.8	13883	13243.5	0.953933	12465.2	0.89787	0.653347	0.433593	TRUE
FALSE	High	Master Protein	Q9H3S7	Tyrosine-protein phosphatase non-receptor type 23 [OS=Homo sapiens]	0	FALSE	321.975	29	39	139	39	1	1636	178.9	6.92	578.1	39	0	13171.4	12330.2	15192.6	15001	14116.4	13300.3		13171.4	13282.8	14684.3	14649.7	16014.2	15635.1	13227.1	14667	1.10886	15824.6	1.19638	0.532193	0.231078	TRUE
FALSE	High	Master Protein	Q12769	nuclear pore complex protein Nup160 [OS=Homo sapiens]	0	FALSE	321.904	32	34	145	34	1	1436	162	5.5	522.64	34	0	14080.2	12901.3	13645.8	13504.3	12999.3	12711.4		14080.2	13898.1	13189.3	13188.1	14746.9	14942.8	13989.1	13188.7	0.942778	14844.9	1.06117	0.57529	0.726472	FALSE
FALSE	High	Master Protein	P36578	60S ribosomal protein L4 [OS=Homo sapiens]	0	FALSE	320.639	47	30	388	30	1	427	47.7	11.06	1235.76	30	0	54903.6	50883.1	50478.8	50232.9	45999.4	44432.2		54903.6	54814.4	48790	49056.5	52183.5	52232	54859	48923.2	0.8918	52207.7	0.951672	0.294592	0.440404	TRUE
FALSE	High	Master Protein	P38606	V-type proton ATPase catalytic subunit A [OS=Homo sapiens]	0	FALSE	320.493	57	35	222	35	1	617	68.3	5.52	732.72	35	0	26340.2	24482.8	22971.3	22621	26566.5	25344		26340.2	26374.4	22202.8	22091.3	30138.1	29793	26357.3	22147	0.840261	29965.5	1.1369	0.115781	0.483234	FALSE
FALSE	High	Master Protein	Q9H2P0	Activity-dependent neuroprotector homeobox protein [OS=Homo sapiens]	0	FALSE	320.175	40	41	127	41	1	1102	123.5	7.34	481.57	41	0	13495.4	12012	15244.9	15004.6	9782.6	9568.5		13495.4	12940.1	14734.9	14653.2	11097.8	11248.2	13217.7	14694	1.11169	11173	0.845302	0.521671	0.275775	FALSE
FALSE	High	Master Protein	P22392-2	Isoform 3 of Nucleoside diphosphate kinase B [OS=Homo sapiens]	0	FALSE	319.853	77	18	451	2	1	267	30.1	8.92	1616.16	18	22	62584.7	60824	65751.5	66651.4	61711.3	59939.9		62584.7	65523.3	63551.7	65090.5	70007.7	70461.9	64054	64321.1	1.00417	70234.8	1.09649	0.947107	0.658064	TRUE
FALSE	High	Master Protein	P42356	phosphatidylinositol 4-kinase alpha [OS=Homo sapiens]	0	FALSE	319.052	26	57	121	57	1	2102	236.7	7.06	409.11	57	0	13678.7	12559.5	14950.2	14548.1	12708.8	11995.7		13678.7	13529.9	14450	14207.4	14417.4	14101.5	13604.3	14328.7	1.05325	14259.4	1.04816	0.757725	0.788529	TRUE
FALSE	High	Master Protein	Q7Z2Z2	Elongation factor-like GTPase 1 [OS=Homo sapiens]	0	FALSE	318.917	44	39	148	38	1	1120	125.4	5.91	516.63	39	0	13448.6	12514.2	16270.5	16260.6	13519.3	12921.3		13448.6	13481.1	15726.1	15879.8	15336.8	15189.5	13464.8	15803	1.17365	15263.2	1.13356	0.320678	0.421565	TRUE
FALSE	High	Master Protein	Q02218	2-oxoglutarate dehydrogenase, mitochondrial [OS=Homo sapiens]	0	FALSE	318.168	44	41	104	41	1	1023	115.9	6.86	410.18	41	0	13156.5	12295.1	14282.1	14406	9806	9561		13156.5	13245	13804.3	14068.6	11124.3	11239.4	13200.8	13936.5	1.05573	11181.8	0.84706	0.74702	0.282028	FALSE
FALSE	High	Master Protein	P46459	Vesicle-fusing ATPase [OS=Homo sapiens]	0	FALSE	318.019	53	47	170	46	1	744	82.5	6.95	613.63	47	1	20362.8	18545.6	24386	23938.7	19470.2	18724		20362.8	19978.5	23570.1	23378.1	22087.8	22010.9	20170.6	23474.1	1.16378	22049.3	1.09314	0.233293	0.673662	TRUE
FALSE	High	Master Protein	O15042	U2 snRNP-associated SURP motif-containing protein [OS=Homo sapiens]	0	FALSE	317.798	36	37	172	36	1	1029	118.2	8.47	566.22	37	1	22961.7	21013.7	19285.6	19059.3	20157.9	19459.4		22961.7	22637.2	18640.4	18613	22867.9	22875.4	22799.5	18626.7	0.816978	22871.6	1.00317	0.0696883	0.805397	FALSE
FALSE	High	Master Protein	P23381	Tryptophan--tRNA ligase, cytoplasmic [OS=Homo sapiens]	0	FALSE	317.562	70	28	193	28	1	471	53.1	6.23	691.64	28	0	31244.5	28030.1	23886.4	23821.2	26554.2	24926.3		31244.5	30195.7	23087.2	23263.3	30124.1	29301.9	30720.1	23175.3	0.754401	29713	0.967217	0.0144155	0.539895	TRUE
FALSE	High	Master Protein	Q8TAQ2-3	Isoform 3 of SWI/SNF complex subunit SMARCC2 [OS=Homo sapiens]	0	FALSE	317.08	39	37	157	2	1	1152	126.8	5.55	570.41	37	0	836.5	770.1	933.2	909.5	638.6	639.3		836.5	829.599	901.978	888.201	724.453	751.525	833.049	895.09	1.07447	737.989	0.885888	0.784424	0.759158	FALSE
FALSE	High	Master Protein	Q13228-4	Isoform 4 of Selenium-binding protein 1 [OS=Homo sapiens]	0	FALSE	316.786	69	35	168	35	1	514	56.8	6.48	596.81	35	0	13725.8	12871.5	27986.3	26477.2	12673.2	12610.1		13725.8	13866	27050	25857.1	14377	14823.7	13795.9	26453.6	1.9175	14600.3	1.05831	7.65202e-11	0.739967	TRUE
FALSE	High	Master Protein	O75083	WD repeat-containing protein 1 [OS=Homo sapiens]	0	FALSE	316.734	57	29	223	29	1	606	66.2	6.65	893.09	29	0	28056.5	25799.8	39894	39651.6	30811.6	29290.7		28056.5	27793.1	38559.3	38723	34953.9	34432.5	27924.8	38641.2	1.38376	34693.2	1.24238	0.00608329	0.168811	TRUE
FALSE	High	Master Protein	P21399	Cytoplasmic aconitate hydratase [OS=Homo sapiens]	0	FALSE	316.647	44	35	143	35	1	889	98.3	6.68	502.3	35	0	19807.1	18352.3	19252.5	18793.5	17478.3	16482.8		19807.1	19770.2	18608.4	18353.4	19828.1	19376.2	19788.7	18480.9	0.933913	19602.2	0.990575	0.516579	0.914136	TRUE
FALSE	High	Master Protein	Q8TEX9-1	Importin-4 [OS=Homo sapiens]	0	FALSE	316.401	41	34	138	34	1	1081	118.6	4.96	513.79	34	0	14708.2	13939.5	14891.4	14412.2	14010.3	13370.6		14708.2	15016.5	14393.2	14074.7	15893.8	15717.7	14862.3	14233.9	0.957718	15805.8	1.06348	0.680782	0.71564	FALSE
FALSE	High	Master Protein	P04040	catalase [OS=Homo sapiens]	0	FALSE	316.38	56	32	212	32	1	527	59.7	7.39	761.64	32	0	19909.1	18286.1	22039.2	22027	17580.1	16723.3		19909.1	19698.9	21301.8	21511.2	19943.6	19659	19804	21406.5	1.08092	19801.3	0.999861	0.543464	0.967945	FALSE
FALSE	High	Master Protein	Q9UQ80	proliferation-associated protein 2G4 [OS=Homo sapiens]	0	FALSE	316.276	73	26	535	25	1	394	43.8	6.55	2140.22	26	1	61274.5	57440.3	52076.9	51656.9	57075.1	54777.5		61274.5	61878.2	50334.6	50447.2	64748.2	64393.3	61576.4	50390.9	0.818348	64570.8	1.04863	0.0725265	0.891563	FALSE
FALSE	High	Master Protein	Q13616	Cullin-1 [OS=Homo sapiens]	0	FALSE	315.877	47	39	165	39	1	776	89.6	8	588.13	39	0	23792.7	21855.9	21652.2	21446.2	20375.9	19580.7		23792.7	23544.5	20927.8	20944	23115.2	23018	23668.6	20935.9	0.884542	23066.6	0.974565	0.261871	0.590547	TRUE
FALSE	High	Master Protein	Q16658	Fascin [OS=Homo sapiens]	0	FALSE	315.296	69	32	474	32	1	493	54.5	7.24	1891.57	32	0	34054.6	32509.4	35955.5	35606.3	36864.8	35657.3		34054.6	35021.1	34752.6	34772.5	41820.9	41916.7	34537.9	34762.5	1.0065	41868.8	1.21226	0.934007	0.236688	TRUE
FALSE	High	Master Protein	Q9Y6D6	Brefeldin A-inhibited guanine nucleotide-exchange protein 1 [OS=Homo sapiens]	0	FALSE	315.239	30	47	136	27	1	1849	208.6	5.85	445.22	47	21	15508.3	14426.2	18475.1	18340.8	17291.1	16077.3		15508.3	15540.8	17857	17911.3	19615.7	18899.6	15524.5	17884.1	1.15199	19257.6	1.24046	0.384343	0.140479	TRUE
FALSE	High	Master Protein	P0DJD1	RANBP2-like and GRIP domain-containing protein 2 [OS=Homo sapiens]	0	FALSE	314.838	26	48	145	8	1	1756	197.2	6.2	466.36	48	4	1722.4	1651.8	2000.6	2000	1482.4	1482.9		1722.4	1779.42	1933.67	1953.16	1681.69	1743.21	1750.91	1943.42	1.10995	1712.45	0.978036	0.632966	0.857354	FALSE
FALSE	High	Master Protein	P51991-1	Heterogeneous nuclear ribonucleoprotein A3 [OS=Homo sapiens]	0	FALSE	314.506	47	25	344	23	1	378	39.6	9.01	1251.26	25	0	31826.5	30016.4	33319.4	32567.9	26787.9	26704.8		31826.5	32335.5	32204.6	31805.2	30389.3	31392.6	32081	32004.9	0.997629	30890.9	0.962905	0.983874	0.51121	TRUE
FALSE	High	Master Protein	P52788-1	Spermine synthase [OS=Homo sapiens]	0	FALSE	313.12	74	27	100	27	1	366	41.2	5.02	399.05	27	0	13175.1	12189.6	13011.4	12955.8	11099	10528		13175.1	13131.4	12576.1	12652.4	12591.1	12376.1	13153.2	12614.2	0.959021	12483.6	0.949091	0.690328	0.681822	TRUE
FALSE	High	Master Protein	P54578	Ubiquitin carboxyl-terminal hydrolase 14 [OS=Homo sapiens]	0	FALSE	312.948	67	31	173	31	1	494	56	5.3	685.29	31	0	28274	26535.9	30904.6	30453.2	26448.3	25229.1		28274	28586.1	29870.6	29740	30004	29657.9	28430	29805.3	1.04837	29830.9	1.04928	0.705371	0.888298	TRUE
FALSE	High	Master Protein	P78417	Glutathione S-transferase omega-1 [OS=Homo sapiens]	0	FALSE	312.615	68	25	238	25	1	241	27.5	6.6	771.86	25	0	35580.5	32790.3	50069.9	49582.9	34335.9	32406.1		35580.5	35323.7	48394.7	48421.8	38952	38094.8	35452.1	48408.2	1.36545	38523.4	1.08663	0.00894406	0.704328	TRUE
FALSE	High	Master Protein	P52732	Kinesin-like protein KIF11 [OS=Homo sapiens]	0	FALSE	311.683	47	46	131	46	1	1056	119.1	5.64	445.95	46	0	18295.9	16495.3	22643.2	22206.4	15247.4	14666.8		18295.9	17769.7	21885.6	21686.4	17297.3	17241.5	18032.8	21786	1.20813	17269.4	0.957662	0.1324	0.728176	FALSE
FALSE	High	Master Protein	Q96KR1	Zinc finger RNA-binding protein [OS=Homo sapiens]	0	FALSE	311.548	44	36	130	36	1	1074	116.9	9.04	521.91	36	0	16874.9	15077.5	17596.8	17309.3	11798.5	11500.9		16874.9	16242.4	17008.1	16903.9	13384.7	13519.8	16558.7	16956	1.024	13452.2	0.8124	0.886977	0.159842	FALSE
FALSE	High	Master Protein	Q13867	bleomycin hydrolase [OS=Homo sapiens]	0	FALSE	311.507	51	27	247	27	1	455	52.5	6.27	838.76	27	0	25513.8	23057.4	25063.3	24923.6	19775.1	18383		25513.8	24838.8	24224.8	24339.9	22433.7	21610	25176.3	24282.3	0.964492	22021.8	0.874704	0.757974	0.119603	TRUE
FALSE	High	Master Protein	Q5JTH9-1	RRP12-like protein [OS=Homo sapiens]	0	FALSE	311.383	41	45	122	45	1	1297	143.6	8.75	424.81	45	0	12801.8	11834.6	11919.5	11984	11461.1	11432.8		12801.8	12749	11520.7	11703.4	13001.9	13439.7	12775.4	11612	0.908939	13220.8	1.03487	0.414112	0.853304	FALSE
FALSE	High	Master Protein	Q16881-1	Thioredoxin reductase 1, cytoplasmic [OS=Homo sapiens]	0	FALSE	310.893	39	24	159	23	1	649	70.9	7.39	620.47	24	1	19448	17979.8	17011.8	16822.5	17726	16914.6		19448	19368.9	16442.6	16428.5	20109.1	19883.8	19408.5	16435.6	0.846826	19996.5	1.0303	0.129397	0.984829	FALSE
FALSE	High	Master Protein	P14868	Aspartate--tRNA ligase, cytoplasmic [OS=Homo sapiens]	0	FALSE	310.863	69	34	221	34	1	501	57.1	6.55	790.39	34	0	32531.9	30118.9	33167.2	33082.8	22410	21595.9		32531.9	32445.9	32057.5	32308.1	25422.8	25386.9	32488.9	32182.8	0.990578	25404.8	0.781954	0.966021	0.0123383	TRUE
FALSE	High	Master Protein	Q96R06	Sperm-associated antigen 5 [OS=Homo sapiens]	0	FALSE	310.456	39	37	93	37	1	1193	134.3	5	369.31	37	0	10120	9621.5	10072	9818.2	8000.2	7731.9		10120	10364.9	9735.03	9588.27	9075.74	9089.18	10242.4	9661.65	0.943296	9082.46	0.886748	0.589007	0.448608	TRUE
FALSE	High	Master Protein	P08237-3	Isoform 3 of ATP-dependent 6-phosphofructokinase, muscle type [OS=Homo sapiens]	0	FALSE	310.394	37	29	203	26	1	851	93.2	7.97	639.88	29	1	17360.3	16308.8	21158.8	21099.2	15927.1	14949.6		17360.3	17568.8	20450.9	20605.1	18068.3	17573.9	17464.6	20528	1.17541	17821.1	1.02042	0.202683	0.924885	TRUE
FALSE	High	Master Protein	Q5SRE5	Nucleoporin NUP188 homolog [OS=Homo sapiens]	0	FALSE	310.107	26	44	120	44	1	1749	195.9	6.73	448.69	44	0	15163.3	13995.4	14432.7	14270.5	14076	13493.3		15163.3	15076.7	13949.8	13936.3	15968.4	15862	15120	13943.1	0.922161	15915.2	1.05259	0.44383	0.767214	FALSE
FALSE	High	Master Protein	P62191	26S protease regulatory subunit 4 [OS=Homo sapiens]	0	FALSE	309.787	68	29	206	27	1	440	49.2	6.21	753.94	29	0	20998.5	19029.8	21733.8	21451.9	20130.6	19096.5		20998.5	20500.1	21006.7	20949.5	22836.9	22448.8	20749.3	20978.1	1.01103	22642.9	1.09126	0.908681	0.682469	TRUE
FALSE	High	Master Protein	Q01780	exosome component 10 [OS=Homo sapiens]	0	FALSE	308.781	52	40	129	40	1	885	100.8	8.46	498.82	40	0	16154.3	14721.8	14354.9	14384.1	12057.5	11901.6		16154.3	15859.2	13874.6	14047.2	13678.5	13990.8	16006.8	13960.9	0.87219	13834.7	0.864302	0.206331	0.304156	TRUE
FALSE	High	Master Protein	Q9BXP5	serrate RNA effector molecule homolog [OS=Homo sapiens]	0	FALSE	307.932	42	42	152	42	1	876	100.6	5.96	477.98	42	0	21328	19263.7	22512.1	22204.2	17987.3	17293.3		21328	20752	21758.9	21684.2	20405.5	20329	21040	21721.6	1.03239	20367.3	0.968025	0.79072	0.545353	FALSE
FALSE	High	Master Protein	O15027-2	Isoform 2 of Protein transport protein Sec16A [OS=Homo sapiens]	0	FALSE	307.683	29	44	135	1	1	2134	228.7	5.62	465.11	44	0	32.8	13.8	14	12.1	22.5	11.5		32.8	14.8662	13.5316	11.8166	25.5249	13.5187	23.8331	12.6741	0.531787	19.5218	0.819105	0.0417723	0.529174	TRUE
FALSE	High	Master Protein	P17655-1	Calpain-2 catalytic subunit [OS=Homo sapiens]	0	FALSE	307.573	43	26	133	26	1	700	79.9	4.98	494.39	26	0	13727.3	12640.7	18323.4	18104	10416.7	9892.1		13727.3	13617.3	17710.4	17680	11817.1	11628.6	13672.3	17695.2	1.29424	11722.9	0.857415	0.093203	0.281157	FALSE
FALSE	High	Master Protein	Q6PEY2	Tubulin alpha-3E chain [OS=Homo sapiens]	0	FALSE	307.477	58	21	1127	3	1	450	49.8	5.14	4352.03	21	0	686.5	605.2	821.7	802.1	514.7	524.7		686.5	651.959	794.209	783.316	583.896	616.807	669.229	788.762	1.17861	600.352	0.897079	0.465967	0.678737	FALSE
FALSE	High	Master Protein	Q9UKV3-1	Apoptotic chromatin condensation inducer in the nucleus [OS=Homo sapiens]	0	FALSE	305.553	35	40	144	40	1	1341	151.8	6.43	536.86	40	0	19446.7	17260.8	18474.4	18468.3	16664.9	16223.1		19446.7	18594.4	17856.3	18035.8	18905.3	19070.9	19020.5	17946.1	0.943509	18988.1	0.998296	0.580265	0.958858	TRUE
FALSE	High	Master Protein	Q9Y2A7-2	Isoform 2 of Nck-associated protein 1 [OS=Homo sapiens]	0	FALSE	305.418	35	38	123	37	1	1134	129.4	6.68	422.36	38	1	17002.1	15189.7	19773.2	19666.4	11766.7	11200		17002.1	16363.3	19111.7	19205.8	13348.6	13166.1	16682.7	19158.8	1.14842	13257.3	0.794677	0.395535	0.12486	FALSE
FALSE	High	Master Protein	Q9NSY1	BMP-2-inducible protein kinase [OS=Homo sapiens]	0	FALSE	305.297	33	27	119	26	1	1161	129.1	6.51	491.16	27	1	10358.4	9372.8	10653.6	10512.2	8149.5	7876.4		10358.4	10097	10297.2	10266	9245.11	9259.05	10227.7	10281.6	1.00527	9252.08	0.904612	0.966745	0.538827	FALSE
FALSE	High	Master Protein	Q8IWV7-1	E3 ubiquitin-protein ligase UBR1 [OS=Homo sapiens]	0	FALSE	304.857	29	45	108	45	1	1749	200.1	6.01	412.1	45	0	12935.2	12184.9	18338.6	17469	13384.1	12521.7		12935.2	13126.3	17725.1	17059.9	15183.5	14719.8	13030.8	17392.5	1.33472	14951.6	1.14741	0.0562665	0.373169	TRUE
FALSE	High	Master Protein	P43246-1	DNA mismatch repair protein MSH2 [OS=Homo sapiens]	0	FALSE	304.73	42	38	151	38	1	934	104.7	5.77	479.78	38	0	23553.2	21573.7	21763.1	21398.6	15537.3	14936.6		23553.2	23240.5	21035	20897.5	17626.1	17558.6	23396.9	20966.2	0.896113	17592.4	0.751912	0.315285	0.0648663	TRUE
FALSE	High	Master Protein	Q9HB71	Calcyclin-binding protein [OS=Homo sapiens]	0	FALSE	304.397	56	17	201	17	1	228	26.2	8.25	785.76	17	0	32503	30286.1	28940.9	28776.2	26119.5	24836.6		32503	32626	27972.6	28102.3	29631	29196.5	32564.5	28037.5	0.860982	29413.7	0.903245	0.173259	0.205737	TRUE
FALSE	High	Master Protein	P61978-2	Isoform 2 of Heterogeneous nuclear ribonucleoprotein K [OS=Homo sapiens]	0	FALSE	304.259	64	28	313	2	1	464	51	5.33	1121.65	28	0	1213.3	1186.4	1042	1024.5	458.4	470		1213.3	1278.06	1007.14	1000.51	520.027	552.505	1245.68	1003.82	0.805843	536.266	0.4305	0.234212	0.00495086	TRUE
FALSE	High	Master Protein	Q7Z3J3	RanBP2-like and GRIP domain-containing protein 4 [OS=Homo sapiens]	0	FALSE	304.107	25	44	171	1	1	1758	197.2	6.27	548.75	44	0	96.1	102.2	103.3	104.7	79.1	74.7		96.1	110.096	99.8439	102.248	89.7342	87.8131	103.098	101.046	0.980096	88.7736	0.86106	0.858415	0.664653	TRUE
FALSE	High	Master Protein	Q9Y4W6	AFG3-like protein 2 [OS=Homo sapiens]	0	FALSE	303.544	48	37	143	36	1	797	88.5	8.66	487.34	37	1	13952.2	13867.2	18080.8	18459.9	13856.1	13756.4		13952.2	14938.6	17475.9	18027.6	15718.9	16171.2	14445.4	17751.7	1.22889	15945.1	1.10382	0.191162	0.53709	TRUE
FALSE	High	Master Protein	Q86UX7	Fermitin family homolog 3 [OS=Homo sapiens]	0	FALSE	303.482	61	32	175	32	1	667	75.9	6.98	649.92	32	0	14984.1	14022.5	24376.9	23525.1	13358.7	12614.5		14984.1	15105.9	23561.3	22974.2	15154.6	14828.9	15045	23267.8	1.54654	14991.8	0.996461	9.97232e-05	0.948215	FALSE
FALSE	High	Master Protein	P19367-1	Hexokinase-1 [OS=Homo sapiens]	0	FALSE	303.281	43	40	167	36	1	917	102.4	6.8	525.87	40	7	16946.7	15921.3	20738.6	20275.8	20904.9	20420.2		16946.7	17151.4	20044.8	19801	23715.3	24004.8	17049	19922.9	1.16856	23860.1	1.3995	0.220326	0.0172489	TRUE
FALSE	High	Master Protein	P30876	DNA-directed RNA polymerase II subunit RPB2 [OS=Homo sapiens]	0	FALSE	303.215	42	44	114	44	1	1174	133.8	6.87	411.01	44	0	16327.1	15008.1	15756	15483.5	13614.9	13143.6		16327.1	16167.6	15228.9	15120.9	15445.3	15450.9	16247.4	15174.9	0.93399	15448.1	0.950804	0.517075	0.690997	TRUE
FALSE	High	Master Protein	Q8WVM8	Sec1 family domain-containing protein 1 [OS=Homo sapiens]	0	FALSE	302.76	50	24	120	24	1	642	72.3	6.27	438.47	24	0	14300.8	13235.1	15660.6	15655.7	11936.4	11422.1		14300.8	14257.7	15136.7	15289.1	13541.1	13427.2	14279.2	15212.9	1.06538	13484.1	0.944319	0.705831	0.656507	FALSE
FALSE	High	Master Protein	O14578-4	Isoform 4 of Citron Rho-interacting kinase [OS=Homo sapiens]	0	FALSE	302.602	24	49	113	13	1	2069	236.5	6.67	385.76	49	38	12916	12041.1	17282.3	16652.6	8835.3	8577.9		12916	12971.4	16704.1	16262.6	10023.1	10083.7	12943.7	16483.4	1.27347	10053.4	0.776702	0.118609	0.101093	FALSE
FALSE	High	Master Protein	O94979	Protein transport protein Sec31A [OS=Homo sapiens]	0	FALSE	302.566	36	40	218	14	1	1220	132.9	6.89	714.05	40	29	21147.3	19025.2	21596.2	21175.3	22026.8	20568.1		21147.3	20495.1	20873.7	20679.4	24988.1	24178.7	20821.2	20776.5	0.997855	24583.4	1.18069	0.982603	0.326437	FALSE
FALSE	High	Master Protein	O95239-1	Chromosome-associated kinesin KIF4A [OS=Homo sapiens]	0	FALSE	302.543	38	44	102	43	1	1232	139.8	6.27	418.1	44	1	14301.7	12770.9	14077	13763.4	10009.7	9603		14301.7	13757.6	13606	13441.1	11355.4	11288.7	14029.6	13523.6	0.963927	11322.1	0.80701	0.726697	0.162502	TRUE
FALSE	High	Master Protein	Q14289-2	Isoform 2 of Protein-tyrosine kinase 2-beta [OS=Homo sapiens]	0	FALSE	302.542	51	40	110	39	1	967	111.1	5.91	397.87	40	1	11123.8	10667.5	17269.9	16992.6	16927.6	15928		11123.8	11491.7	16692.1	16594.7	19203.3	18724	11307.7	16643.4	1.47186	18963.7	1.67705	0.0071727	2.537e-05	TRUE
FALSE	High	Master Protein	Q9BUJ2-1	Heterogeneous nuclear ribonucleoprotein U-like protein 1 [OS=Homo sapiens]	0	FALSE	301.978	36	29	139	28	1	856	95.7	6.92	527.59	29	0	17737.5	16032.8	18424.4	18203.9	13208.7	12856.3		17737.5	17271.5	17808	17777.6	14984.5	15113.1	17504.5	17792.8	1.01647	15048.8	0.85971	0.920879	0.288687	FALSE
FALSE	High	Master Protein	Q9C0C9	(E3-independent) E2 ubiquitin-conjugating enzyme [OS=Homo sapiens]	0	FALSE	301.95	37	38	109	38	1	1292	141.2	5.12	436.91	38	0	14963	13869.9	17555.1	17110.1	14980.8	14285.5		14963	14941.5	16967.8	16709.4	16994.8	16793.2	14952.3	16838.6	1.12616	16894	1.12986	0.469663	0.435073	TRUE
FALSE	High	Master Protein	P26358-1	DNA (cytosine-5)-methyltransferase 1 [OS=Homo sapiens]	0	FALSE	301.915	35	47	116	47	1	1616	183.1	7.75	419.39	47	0	14643	13121.4	12949.5	12590.5	9709.5	9176		14643	14135.2	12516.3	12295.7	11014.8	10786.8	14389.1	12406	0.862178	10900.8	0.757575	0.172726	0.072997	TRUE
FALSE	High	Master Protein	Q92538	Golgi-specific brefeldin A-resistance guanine nucleotide exchange factor 1 [OS=Homo sapiens]	0	FALSE	301.894	28	46	160	45	1	1859	206.3	5.73	501.58	46	0	10613	9716.1	11399.9	11399.3	14820.3	13661.3		10613	10466.8	11018.5	11132.3	16812.7	16059.4	10539.9	11075.4	1.05081	16436.1	1.55942	0.81089	0.000512971	TRUE
FALSE	High	Master Protein	P21281	V-type proton ATPase subunit B, brain isoform [OS=Homo sapiens]	0	FALSE	301.59	72	28	183	28	1	511	56.5	5.81	757.07	28	0	12675	11905.4	11434.7	11060.6	14750.2	14103.4		12675	12825.2	11052.1	10801.6	16733.2	16579.2	12750.1	10926.9	0.857001	16656.2	1.30636	0.217012	0.0591387	FALSE
FALSE	High	Master Protein	P06493	Cyclin-dependent kinase 1 [OS=Homo sapiens]	0	FALSE	301.498	79	24	266	22	1	297	34.1	8.4	931.2	24	1	29748	27419.4	28050.5	27121	26083.9	24596.4		29748	29537.9	27112	26485.9	29590.6	28914.1	29642.9	26798.9	0.904059	29252.4	0.986824	0.355844	0.679594	TRUE
FALSE	High	Master Protein	P02786	Transferrin receptor protein 1 [OS=Homo sapiens]	0	FALSE	301.49	50	36	312	35	1	760	84.8	6.61	1087.63	36	1	24560.9	24264.2	44797.1	44642.1	27741.2	27285.4		24560.9	26138.9	43298.3	43596.7	31470.7	32075.2	25349.9	43447.5	1.71391	31772.9	1.25338	3.94535e-07	0.148065	TRUE
FALSE	High	Master Protein	O95831-1	Apoptosis-inducing factor 1, mitochondrial [OS=Homo sapiens]	0	FALSE	301.195	48	28	159	28	1	613	66.9	8.95	583.07	28	0	16883.8	16178.2	19453.3	19664.6	15678.8	15963.6		16883.8	17428.1	18802.5	19204.1	17786.6	18765.9	17156	19003.3	1.10768	18276.3	1.0653	0.536612	0.707125	TRUE
FALSE	High	Master Protein	Q9UDY2	Tight junction protein ZO-2 [OS=Homo sapiens]	0	FALSE	301.074	40	40	111	40	1	1190	133.9	7.4	432.43	40	0	14429.2	13218.2	18312.5	17579.6	14224.4	13302.5		14429.2	14239.5	17699.8	17167.9	16136.7	15637.7	14334.3	17433.9	1.21623	15887.2	1.10833	0.216755	0.518585	TRUE
FALSE	High	Master Protein	Q8TCS8	Polyribonucleotide nucleotidyltransferase 1, mitochondrial [OS=Homo sapiens]	0	FALSE	300.695	46	33	165	33	1	783	85.9	7.77	606.69	33	0	16561.4	15620.5	17354	17498.8	13251.7	13219.5		16561.4	16827.4	16773.4	17089	15033.3	15540.1	16694.4	16931.2	1.01419	15286.7	0.915678	0.931194	0.513527	FALSE
FALSE	High	Master Protein	P06748	Nucleophosmin [OS=Homo sapiens]	0	FALSE	300.659	64	18	345	18	1	294	32.6	4.78	1386.86	18	0	47969.5	44286.7	46185.5	46292	44427.7	43742.9	Acetyl [N-Term]	47969.5	47708.3	44640.3	45207.9	50400.5	51421.7	47838.9	44924.1	0.93907	50911.1	1.06422	0.57077	0.813372	FALSE
FALSE	High	Master Protein	Q14166	Tubulin--tyrosine ligase-like protein 12 [OS=Homo sapiens]	0	FALSE	300.615	60	29	137	29	1	644	74.4	5.53	508.85	29	0	14032.4	13382	11677.4	11139.7	11525.1	11048.4		14032.4	14415.9	11286.7	10878.8	13074.5	12987.9	14224.2	11082.8	0.779151	13031.2	0.916132	0.0627723	0.515661	TRUE
FALSE	High	Master Protein	Q14966-1	Zinc finger protein 638 [OS=Homo sapiens]	0	FALSE	300.461	24	44	131	44	1	1978	220.5	6.38	462.23	44	0	15755.6	14173.9	16611.8	15986.2	11212.9	10837		15755.6	15269	16056	15611.8	12720.4	12739.4	15512.3	15833.9	1.02073	12729.9	0.82063	0.90165	0.178414	FALSE
FALSE	High	Master Protein	Q86XP3-1	ATP-dependent RNA helicase DDX42 [OS=Homo sapiens]	0	FALSE	300.434	48	36	131	36	1	938	102.9	7.02	509.44	36	0	14293.8	13111.6	14989.2	14833.6	10764.2	10523.9		14293.8	14124.6	14487.7	14486.2	12211.3	12371.3	14209.2	14487	1.01955	12291.3	0.865024	0.906993	0.30664	FALSE
FALSE	High	Master Protein	Q00013-1	55 kDa erythrocyte membrane protein [OS=Homo sapiens]	0	FALSE	300.325	70	27	151	27	1	466	52.3	7.37	534.93	27	0	16402.5	14902.5	17228.9	17247.5	12268.1	11751.8		16402.5	16053.9	16652.5	16843.6	13917.4	13814.7	16228.2	16748	1.03203	13866.1	0.854444	0.851012	0.27161	FALSE
FALSE	High	Master Protein	Q9NR45	sialic acid synthase [OS=Homo sapiens]	0	FALSE	299.581	55	17	183	17	1	359	40.3	6.74	584.44	17	0	16986.4	15663.9	20490.5	20435.4	19765.2	18678.7		16986.4	16874.1	19805	19956.8	22422.4	21957.6	16930.3	19880.9	1.17428	22190	1.31067	0.205512	0.0698294	TRUE
FALSE	High	Master Protein	Q14997	Proteasome activator complex subunit 4 [OS=Homo sapiens]	0	FALSE	299.551	32	47	128	46	1	1843	211.2	6.9	478.06	47	1	13030.5	11999.4	13372.6	13051.3	16097.3	14908.3		13030.5	12926.5	12925.2	12745.7	18261.4	17525.3	12978.5	12835.4	0.988977	17893.4	1.37869	0.920429	0.0192458	FALSE
FALSE	High	Master Protein	O15027-5	Isoform 5 of Protein transport protein Sec16A [OS=Homo sapiens]	0	FALSE	299.127	27	44	133	1	1	2201	235.6	5.67	458.29	44	46	13314.3	12215	12031.8	11894.9	12745.6	12010.3		13314.3	13158.7	11629.3	11616.3	14459.1	14118.6	13236.5	11622.8	0.878086	14288.9	1.0795	0.286927	0.642096	FALSE
FALSE	High	Master Protein	O75179-1	Ankyrin repeat domain-containing protein 17 [OS=Homo sapiens]	0	FALSE	299.123	20	44	113	32	1	2603	274.1	6.52	414.86	44	1	9328.3	8662	9398.8	9244.1	9062.3	8612.9		9328.3	9331.24	9084.35	9027.62	10280.6	10124.8	9329.77	9055.98	0.970655	10202.7	1.09357	0.748831	0.575192	FALSE
FALSE	High	Master Protein	Q15046-2	Isoform Mitochondrial of Lysine--tRNA ligase [OS=Homo sapiens]	0	FALSE	298.858	50	30	235	30	1	625	71.5	6.81	762.3	30	0	30353.9	27821.2	28816.9	28292.4	27860.2	26680.2		30353.9	29970.7	27852.8	27629.8	31605.7	31363.7	30162.3	27741.3	0.919735	31484.7	1.04384	0.445021	0.915818	FALSE
FALSE	High	Master Protein	P62195-1	26S protease regulatory subunit 8 [OS=Homo sapiens]	0	FALSE	298.483	69	29	151	27	1	406	45.6	7.55	576.99	29	0	18098.3	16724.7	19477.6	19415.4	17079.1	16345.5		18098.3	18016.9	18825.9	18960.7	19375.2	19214.8	18057.6	18893.3	1.04628	19295	1.06853	0.788046	0.692142	TRUE
FALSE	High	Master Protein	Q9HCE1	Putative helicase MOV-10 [OS=Homo sapiens]	0	FALSE	298.001	49	45	157	45	1	1003	113.6	8.82	537.28	45	0	19644.5	18077.5	17131.3	17077.4	15818.1	14977.2		19644.5	19474.2	16558.1	16677.5	17944.7	17606.3	19559.3	16617.8	0.84961	17775.5	0.908799	0.136555	0.48177	TRUE
FALSE	High	Master Protein	P55209	Nucleosome assembly protein 1-like 1 [OS=Homo sapiens]	0	FALSE	297.712	52	17	163	8	1	391	45.3	4.46	674.81	17	9	12849.8	12138.3	13409.4	13119.5	13910.6	13208		12849.8	13076.1	12960.8	12812.3	15780.7	15526.6	12963	12886.5	0.994103	15653.7	1.20757	0.961071	0.204887	FALSE
FALSE	High	Master Protein	P31040	Succinate dehydrogenase [ubiquinone] flavoprotein subunit, mitochondrial [OS=Homo sapiens]	0	FALSE	297.232	50	28	220	28	1	664	72.6	7.39	805.95	28	0	21978	20404.8	26666	27087.6	15788.3	15598.4		21978	21981.3	25773.8	26453.3	17910.9	18336.6	21979.7	26113.6	1.18808	18123.7	0.824569	0.172789	0.18785	FALSE
FALSE	High	Master Protein	Q7Z460-1	CLIP-associating protein 1 [OS=Homo sapiens]	0	FALSE	297.055	33	43	111	2	1	1538	169.3	9.03	399.61	43	38	13795.1	12658.3	9932.4	9655.8	12235.4	11729		13795.1	13636.3	9600.1	9429.68	13880.3	13787.9	13715.7	9514.89	0.693722	13834.1	1.00863	0.0108322	0.98371	FALSE
FALSE	High	Master Protein	Q07866-6	Isoform N of Kinesin light chain 1 [OS=Homo sapiens]	0	FALSE	296.298	50	36	139	3	1	628	71	6.67	530.53	36	34	15401.4	14194.2	20744.6	20482.7	13949.9	13387.2		15401.4	15290.9	20050.6	20003	15825.3	15737.2	15346.1	20026.8	1.30501	15781.3	1.02836	0.0286775	0.885448	TRUE
FALSE	High	Master Protein	Q9UIA9	exportin-7 [OS=Homo sapiens]	0	FALSE	295.162	39	38	147	38	1	1087	123.8	6.32	520.43	38	0	17644.7	16187.8	18682.9	18096.6	15323.3	14326.2		17644.7	17438.5	18057.8	17672.8	17383.4	16841.1	17541.6	17865.3	1.01845	17112.2	0.975522	0.911919	0.827844	FALSE
FALSE	High	Master Protein	Q96G03	Phosphoglucomutase-2 [OS=Homo sapiens]	0	FALSE	294.984	50	37	124	36	1	612	68.2	6.73	454.33	37	1	20019.5	18456.9	21349.5	21056	15924.4	15243.6		20019.5	19882.9	20635.2	20562.9	18065.3	17919.5	19951.2	20599.1	1.03247	17992.4	0.90182	0.79029	0.450674	FALSE
FALSE	High	Master Protein	O60341	Lysine-specific histone demethylase 1A [OS=Homo sapiens]	0	FALSE	293.773	54	32	134	32	1	852	92.8	6.52	481.11	32	0	16490.8	14874.2	14595.3	14460.7	11741	11410.5		16490.8	16023.4	14107	14122.1	13319.5	13413.5	16257.1	14114.5	0.868207	13366.5	0.822194	0.192433	0.182118	TRUE
FALSE	High	Master Protein	O94822-3	Isoform 3 of E3 ubiquitin-protein ligase listerin [OS=Homo sapiens]	0	FALSE	292.738	29	51	120	51	1	1812	205	6.52	389.28	51	0	13019.7	12103.8	12861.1	12727.1	15260.3	14232.7		13019.7	13039	12430.8	12429.1	17311.9	16731.1	13029.3	12429.9	0.953996	17021.5	1.3064	0.653803	0.0591009	FALSE
FALSE	High	Master Protein	Q9UHX1-1	poly(U)-binding-splicing factor PUF60 [OS=Homo sapiens]	0	FALSE	292.654	54	25	253	1	1	559	59.8	5.29	815.14	25	0	125.3	121.7	144.7	154.6	131	125.7		125.3	131.103	139.859	150.98	148.612	147.766	128.201	145.419	1.1343	148.189	1.15591	0.636775	0.335644	TRUE
FALSE	High	Master Protein	P40763	Signal transducer and activator of transcription 3 [OS=Homo sapiens]	0	FALSE	292.644	52	33	115	33	1	770	88	6.3	407.93	33	0	12339.8	11299.7	12538.4	12182.3	15224.1	14282.5		12339.8	12172.7	12118.9	11897	17270.8	16789.7	12256.3	12008	0.979741	17030.3	1.38951	0.847793	0.0160149	FALSE
FALSE	High	Master Protein	P05198	Eukaryotic translation initiation factor 2 subunit 1 [OS=Homo sapiens]	0	FALSE	292.639	75	30	175	30	1	315	36.1	5.08	608.28	30	0	27475.5	25500.1	25529.4	25455.7	25625.7	24730.8		27475.5	27470.3	24675.3	24859.6	29070.8	29072.1	27472.9	24767.4	0.901522	29071.5	1.05819	0.342554	0.843449	FALSE
FALSE	High	Master Protein	Q2NL82	Pre-rRNA-processing protein TSR1 homolog [OS=Homo sapiens]	0	FALSE	292.623	44	31	116	31	1	804	91.8	7.42	409.34	31	0	13995.1	13155.8	13209.1	12759.5	10672.9	10360.7		13995.1	14172.2	12767.2	12460.7	12107.8	12179.4	14083.7	12613.9	0.895643	12143.6	0.862247	0.303007	0.297168	TRUE
FALSE	High	Master Protein	P22061-2	Isoform 2 of Protein-L-isoaspartate(D-aspartate) O-methyltransferase [OS=Homo sapiens]	0	FALSE	291.936	71	15	203	15	1	228	24.7	6.52	759.57	15	0	20000.1	18346.2	20120.2	20293.6	21155.4	19876.4		20000.1	19763.7	19447	19818.4	23999.5	23365.6	19881.9	19632.7	0.987467	23682.5	1.19116	0.908497	0.294488	FALSE
FALSE	High	Master Protein	Q7KZ85	transcription elongation factor spt6 [OS=Homo sapiens]	0	FALSE	291.899	31	45	109	44	1	1726	198.9	4.91	367.72	45	1	12626.3	11566.5	12538.3	12297.2	10878.7	10603.2		12626.3	12460.1	12118.8	12009.2	12341.2	12464.5	12543.2	12064	0.961796	12402.9	0.988811	0.710814	0.903948	TRUE
FALSE	High	Master Protein	Q01518-1	adenylyl cyclase-associated protein 1 [OS=Homo sapiens]	0	FALSE	291.644	66	33	219	33	1	475	51.9	8.06	771.09	33	0	28933.5	25482.8	30632.7	30635.1	32924.1	30739.2		28933.5	27451.6	29607.8	29917.7	37350.4	36135.2	28192.6	29762.8	1.0557	36742.8	1.30328	0.667409	0.077443	TRUE
FALSE	High	Master Protein	Q14103	heterogeneous nuclear ribonucleoprotein D0 [OS=Homo sapiens]	0	FALSE	291.612	46	22	252	2	1	355	38.4	7.81	794.92	22	0	664	506.7	503.4	455.9	335.6	291.5		664	545.848	486.558	445.224	380.718	342.671	604.924	465.891	0.770164	361.694	0.597917	0.177611	0.0384773	TRUE
FALSE	High	Master Protein	O94826	Mitochondrial import receptor subunit TOM70 [OS=Homo sapiens]	0	FALSE	291.302	56	32	155	32	1	608	67.4	7.12	536.65	32	0	22203.4	21206.5	21945.2	22684.8	22185.4	22241		22203.4	22844.9	21211	22153.6	25168	26145.2	22524.2	21682.3	0.962623	25656.6	1.13907	0.743541	0.474598	FALSE
FALSE	High	Master Protein	P62258-1	14-3-3 protein epsilon [OS=Homo sapiens]	0	FALSE	291.083	73	23	267	20	1	255	29.2	4.74	985.26	23	0	29883	27745.9	35336.3	34534.4	27862.9	26627		29883	29889.6	34154.1	33725.7	31608.8	31301.2	29886.3	33939.9	1.13563	31455	1.05249	0.320493	0.872078	TRUE
FALSE	High	Master Protein	Q9P2E9-1	Ribosome-binding protein 1 [OS=Homo sapiens]	0	FALSE	291.012	31	35	91	2	1	1410	152.4	8.6	357.84	35	0	675.4	641.2	904.9	851.4	888.6	828		675.4	690.74	874.625	831.462	1008.06	973.349	683.07	853.043	1.24884	990.706	1.45037	0.300103	0.0409236	TRUE
FALSE	High	Master Protein	P07602-1	Prosaposin [OS=Homo sapiens]	0	FALSE	290.897	57	27	220	1	1	524	58.1	5.17	684.35	27	29	29478	27541.9	36514.3	36291.3	42196.1	40197.2		29478	29669.8	35292.7	35441.4	47868.9	47253.5	29573.9	35367	1.19589	47561.2	1.60822	0.156086	0.000201719	TRUE
FALSE	High	Master Protein	P11171-1	protein 4.1 [OS=Homo sapiens]	0	FALSE	290.787	41	34	117	4	1	864	97	5.58	429.16	34	31	16929.1	15295.5	16225.8	16222	12568.1	12123.9		16929.1	16477.2	15682.9	15842.1	14257.7	14252.2	16703.2	15762.5	0.943684	14255	0.853428	0.581462	0.268396	TRUE
FALSE	High	Master Protein	O75592-1	E3 ubiquitin-protein ligase MYCBP2 [OS=Homo sapiens]	0	FALSE	290.421	13	52	109	52	1	4640	509.8	7.03	343.15	52	0	9006.7	8327	10204.3	9957.1	8579.4	8183.5		9006.7	8970.35	9862.9	9723.92	9732.81	9620.05	8988.53	9793.41	1.08955	9676.43	1.07653	0.639109	0.63452	TRUE
FALSE	High	Master Protein	O43290	U4/U6.U5 tri-snRNP-associated protein 1 [OS=Homo sapiens]	0	FALSE	289.873	49	35	106	35	1	800	90.2	6.13	415.13	35	0	15038.8	13935.9	14490.6	14230.8	12391.2	12193.2		15038.8	15012.6	14005.8	13897.5	14057.1	14333.6	15025.7	13951.7	0.92852	14195.3	0.944738	0.482449	0.658714	TRUE
FALSE	High	Master Protein	P18583-3	Isoform B of Protein SON [OS=Homo sapiens]	0	FALSE	289.837	24	40	175	1	1	2303	250.2	5.64	616.92	40	0	121.8	100.3	128.4	133.5	108.4	111.1		121.8	108.049	124.104	130.374	122.973	130.603	114.925	127.239	1.10715	126.788	1.10323	0.749116	0.466563	TRUE
FALSE	High	Master Protein	O15371	Eukaryotic translation initiation factor 3 subunit D [OS=Homo sapiens]	0	FALSE	289.785	58	25	122	25	1	548	63.9	6.05	481.99	25	0	13634.1	12680.8	13516.3	12986.6	15469.9	14552.1		13634.1	13660.5	13064.1	12682.5	17549.7	17106.6	13647.3	12873.3	0.943283	17328.1	1.26971	0.578724	0.0974402	FALSE
FALSE	High	Master Protein	Q9C0C2	182 kDa tankyrase-1-binding protein [OS=Homo sapiens]	0	FALSE	289.638	40	44	103	44	1	1729	181.7	4.86	328.09	44	0	9845.8	9302.7	12194.9	11907	11599.3	10900.3		9845.8	10021.4	11786.9	11628.2	13158.7	12813.8	9933.62	11707.5	1.17858	12986.2	1.3073	0.31885	0.0583454	TRUE
FALSE	High	Master Protein	P07355-2	Isoform 2 of Annexin A2 [OS=Homo sapiens]	0	FALSE	289.156	70	32	244	32	1	357	40.4	8.37	846.59	32	0	31453.9	29216	38728.5	38378.5	34165.5	32904.9		31453.9	31473.3	37432.8	37479.7	38758.7	38681.1	31463.6	37456.3	1.19046	38719.9	1.23063	0.16755	0.193314	TRUE
FALSE	High	Master Protein	Q8N163-1	Cell cycle and apoptosis regulator protein 2 [OS=Homo sapiens]	0	FALSE	288.843	49	34	137	34	1	923	102.8	5.22	529.43	34	0	16548.2	15189.6	15252.4	15081.2	15753.9	15346.7		16548.2	16363.2	14742.1	14728	17871.8	18040.7	16455.7	14735.1	0.895439	17956.3	1.09119	0.302057	0.590544	FALSE
FALSE	High	Master Protein	Q96T58	Msx2-interacting protein [OS=Homo sapiens]	0	FALSE	288.016	18	48	89	48	1	3664	402	7.64	348.19	48	0	8624.4	7820.3	9529.1	9380	6961.2	6854.9		8624.4	8424.51	9210.29	9160.34	7897.06	8058.23	8524.45	9185.31	1.07753	7977.64	0.935854	0.69087	0.715683	FALSE
FALSE	High	Master Protein	Q9H0A0	RNA cytidine acetyltransferase [OS=Homo sapiens]	0	FALSE	287.466	44	42	131	42	1	1025	115.7	8.27	419.11	42	0	17865.1	16180.2	14246.5	14070.9	12701.6	12280.5		17865.1	17430.3	13769.9	13741.4	14409.2	14436.3	17647.7	13755.6	0.779457	14422.7	0.817258	0.0286809	0.17062	TRUE
FALSE	High	Master Protein	P62424	60S ribosomal protein L7a [OS=Homo sapiens]	0	FALSE	287.337	61	24	435	24	1	266	30	10.61	1527.58	24	0	48621	44772.9	45008.4	45802.1	45239.1	42919.1		48621	48232.1	43502.6	44729.5	51321	50453.2	48426.6	44116	0.910988	50887.1	1.05081	0.393785	0.880542	FALSE
FALSE	High	Master Protein	P55809	Succinyl-CoA:3-ketoacid coenzyme A transferase 1, mitochondrial [OS=Homo sapiens]	0	FALSE	287.31	52	25	168	24	1	520	56.1	7.46	516.29	25	1	12932.9	11999.8	14333.7	14336.4	9737.7	9739.6		12932.9	12926.9	13854.1	14000.7	11046.8	11449.3	12929.9	13927.4	1.07715	11248.1	0.869927	0.656793	0.372107	FALSE
FALSE	High	Master Protein	Q7Z460-4	Isoform 4 of CLIP-associating protein 1 [OS=Homo sapiens]	0	FALSE	286.582	33	42	110	1	1	1477	163	8.53	395.21	42	0	18.6	19	21.8	24.5	19.2	22.1		18.6	20.468	21.0706	23.9263	21.7812	25.9795	19.534	22.4984	1.15176	23.8804	1.2225	0.624384	0.254854	TRUE
FALSE	High	Master Protein	O00299	chloride intracellular channel protein 1 [OS=Homo sapiens]	0	FALSE	286.461	83	22	402	21	1	241	26.9	5.17	1368.51	22	1	46528	43977.4	50390.9	49639.1	45442.2	43564.8		46528	47375.1	48705	48476.6	51551.4	51212.3	46951.6	48590.8	1.03491	51381.9	1.09436	0.777062	0.667977	TRUE
FALSE	High	Master Protein	Q9UM54-6	Isoform 6 of Unconventional myosin-VI [OS=Homo sapiens]	0	FALSE	285.747	39	45	131	1	1	1285	148.6	8.56	407.47	45	0	271.4	248.9	274.5	262.6	225.7	239.6		271.4	268.13	265.316	256.45	256.043	281.66	269.765	260.883	0.967075	268.852	0.996613	0.858688	0.838354	TRUE
FALSE	High	Master Protein	O60488-1	Long-chain-fatty-acid--CoA ligase 4 [OS=Homo sapiens]	0	FALSE	285.745	48	32	166	30	1	711	79.1	8.38	460.51	32	0	9660.2	8921	21085.3	21122	5829.7	5697		9660.2	9610.25	20379.9	20627.4	6613.44	6697.07	9635.22	20503.6	2.12798	6655.25	0.690721	1.33105e-15	0.0504397	FALSE
FALSE	High	Master Protein	P23246-2	Isoform Short of Splicing factor, proline- and glutamine-rich [OS=Homo sapiens]	0	FALSE	285.356	52	31	200	1	1	669	72.2	9.23	570.23	31	0	15.1	23.4	13.7	12.9	19.8	21.6		15.1	25.2079	13.2416	12.5979	22.4619	25.3917	20.154	12.9198	0.641054	23.9268	1.1872	0.113404	0.322685	FALSE
FALSE	High	Master Protein	P06753-2	Isoform 2 of Tropomyosin alpha-3 chain [OS=Homo sapiens]	0	FALSE	285.309	73	33	212	5	1	248	29	4.78	713.77	33	30	40781.7	35848.4	42960.2	43075.2	34089.4	31757.6		40781.7	38618.1	41522.9	42066.5	38672.4	37332.4	39699.9	41794.7	1.05277	38002.4	0.957242	0.682507	0.47479	FALSE
FALSE	High	Master Protein	P11171-5	Isoform 5 of Protein 4.1 [OS=Homo sapiens]	0	FALSE	284.982	41	31	106	1	1	775	86.6	5.39	408.02	31	0	787.2	753.2	793.8	768.9	811.4	757.8		787.2	811.393	767.242	750.894	920.484	890.826	799.297	759.068	0.94967	905.655	1.13307	0.680106	0.40818	FALSE
FALSE	High	Master Protein	Q9BWD1	Acetyl-CoA acetyltransferase, cytosolic [OS=Homo sapiens]	0	FALSE	284.98	84	24	179	24	1	397	41.3	6.92	719.63	24	0	11855.6	10883.2	14373.9	14271.4	13442.4	12985.8	Acetyl [N-Term]	11855.6	11724	13893	13937.2	15249.6	15265.4	11789.8	13915.1	1.18026	15257.5	1.29412	0.302692	0.0702247	TRUE
FALSE	High	Master Protein	P49756-1	RNA-binding protein 25 [OS=Homo sapiens]	0	FALSE	283.594	34	36	123	36	1	843	100.1	6.32	479.26	36	0	16275.1	14507.5	16974.9	16831.3	16078.6	15518.9		16275.1	15628.4	16407	16437.1	18240.2	18243.1	15951.7	16422.1	1.02948	18241.7	1.14355	0.86239	0.386285	TRUE
FALSE	High	Master Protein	Q9UHX1-2	Isoform 2 of Poly(U)-binding-splicing factor PUF60 [OS=Homo sapiens]	0	FALSE	283.521	53	25	270	1	1	542	58.1	5.35	861.47	25	29	29750.6	27332.6	30240	29940.9	27146.4	26289.9		29750.6	29444.4	29228.3	29239.7	30795.9	30904.9	29597.5	29234	0.98772	30850.4	1.04233	0.942844	0.923489	FALSE
FALSE	High	Master Protein	Q07866-3	Isoform G of Kinesin light chain 1 [OS=Homo sapiens]	0	FALSE	283.492	52	34	133	1	1	564	64.3	6.3	508.27	34	0	100.7	84.6	79.7	79.1	71.4	62.5		100.7	91.1363	77.0335	77.2476	80.999	73.4714	95.9182	77.1406	0.804233	77.2352	0.80522	0.364402	0.487646	TRUE
FALSE	High	Master Protein	Q9UM54-2	Isoform 2 of Unconventional myosin-VI [OS=Homo sapiens]	0	FALSE	283.053	38	45	135	1	1	1262	146	8.53	420.57	45	40	16487	14946.7	17278.6	17020.9	12594.2	11987.5		16487	16101.5	16700.5	16622.3	14287.4	14091.8	16294.3	16661.4	1.02253	14189.6	0.870834	0.893555	0.327095	FALSE
FALSE	High	Master Protein	P43686	26S protease regulatory subunit 6B [OS=Homo sapiens]	0	FALSE	282.983	64	30	197	29	1	418	47.3	5.21	676.82	30	1	23644.5	21404.3	24460.1	24212.9	21606.9	20403.7		23644.5	23058	23641.8	23645.9	24511.7	23985.4	23351.3	23643.8	1.01253	24248.6	1.03843	0.900297	0.943362	TRUE
FALSE	High	Master Protein	Q13045-1	protein flightless-1 homolog [OS=Homo sapiens]	0	FALSE	282.714	35	39	110	3	1	1269	144.7	6.05	419.4	39	34	11726.1	10984.7	14283.8	13923.7	9597.2	9114.8		11726.1	11833.4	13805.9	13597.6	10887.4	10714.8	11779.7	13701.8	1.16316	10801.1	0.916925	0.350588	0.605909	FALSE
FALSE	High	Master Protein	Q12905	Interleukin enhancer-binding factor 2 [OS=Homo sapiens]	0	FALSE	282.694	69	23	202	23	1	390	43	5.26	753.82	23	0	17177	16325.7	18433.7	18124.5	13456.3	13466.7		17177	17587	17817	17700.1	15265.4	15830.7	17382	17758.5	1.02166	15548	0.894489	0.897482	0.419269	FALSE
FALSE	High	Master Protein	P23526-1	Adenosylhomocysteinase [OS=Homo sapiens]	0	FALSE	282.22	56	27	296	25	1	432	47.7	6.34	969.54	27	2	36068.1	33270	35050.1	34651.1	30314.4	28895.8		36068.1	35840.5	33877.4	33839.6	34389.9	33968.3	35954.3	33858.5	0.941711	34179.1	0.950625	0.58917	0.434107	TRUE
FALSE	High	Master Protein	O75717	WD repeat and HMG-box DNA-binding protein 1 [OS=Homo sapiens]	0	FALSE	281.912	42	41	131	41	1	1129	125.9	5.62	460.65	41	0	16289.8	14861.2	16154.2	15951.8	12556.6	12064.8		16289.8	16009.4	15613.7	15578.2	14244.7	14182.7	16149.6	15596	0.96572	14213.7	0.880127	0.740147	0.361613	TRUE
FALSE	High	Master Protein	Q15084-2	Isoform 2 of Protein disulfide-isomerase A6 [OS=Homo sapiens]	0	FALSE	281.871	53	23	104	23	1	492	53.9	5.33	434.96	23	0	10700.3	9762.6	13313.5	12980.4	10668	10359.2		10700.3	10516.9	12868.1	12676.4	12102.2	12177.7	10608.6	12772.2	1.20395	12139.9	1.14435	0.243862	0.383551	TRUE
FALSE	High	Master Protein	Q9UL18	protein argonaute-1 [OS=Homo sapiens]	0	FALSE	281.755	48	33	94	17	1	857	97.2	9.16	366.57	33	10	5114.9	4937.4	7348.8	7242.6	6303.3	5947.4		5114.9	5318.87	7102.93	7072.99	7150.71	6991.42	5216.88	7087.96	1.35866	7071.07	1.35542	0.0879102	0.0290891	TRUE
FALSE	High	Master Protein	P35237	serpin B6 [OS=Homo sapiens]	0	FALSE	281.477	76	24	248	24	1	376	42.6	5.27	793.99	24	0	32744.8	30692.5	40071.8	38765.1	25124.4	24068		32744.8	33063.8	38731.1	37857.3	28502.1	28293	32904.3	38294.2	1.1638	28397.5	0.863034	0.233216	0.0938448	FALSE
FALSE	High	Master Protein	P21980	Protein-glutamine gamma-glutamyltransferase 2 [OS=Homo sapiens]	0	FALSE	280.657	49	33	190	33	1	687	77.3	5.22	627.19	33	0	24958.4	22211.7	32398.6	32068.6	14895.4	13979.9		24958.4	23927.8	31314.7	31317.6	16897.9	16434	24443.1	31316.1	1.28118	16666	0.681826	0.0433937	0.0184401	FALSE
FALSE	High	Master Protein	Q14103-2	Isoform 2 of Heterogeneous nuclear ribonucleoprotein D0 [OS=Homo sapiens]	0	FALSE	280.573	43	22	250	2	1	336	36.2	8.1	784.7	22	25	42361.9	39498.4	42142	42519.1	36118	35990.3		42361.9	42550.1	40732.1	41523.4	40973.7	42308.1	42456	41127.7	0.968714	41640.9	0.980802	0.790887	0.635188	TRUE
FALSE	High	Master Protein	P13489	Ribonuclease inhibitor [OS=Homo sapiens]	0	FALSE	280.111	67	25	163	25	1	461	49.9	4.82	699.56	25	0	16611.6	15708.3	14938.3	14654.1	20319.1	19290.3		16611.6	16921.9	14438.5	14310.9	23050.8	22676.6	16766.8	14374.7	0.857334	22863.7	1.36363	0.158018	0.0314076	FALSE
FALSE	High	Master Protein	Q9BXL5	Hemogen [OS=Homo sapiens]	0	FALSE	279.766	58	23	123	23	1	484	55.3	4.87	507.01	23	0	24250.8	22238.5	25898.3	26274.8	17392.5	17316.4		24250.8	23956.7	25031.8	25659.5	19730.7	20356.2	24103.7	25345.7	1.05152	20043.5	0.83155	0.688942	0.0458756	FALSE
FALSE	High	Master Protein	O75153	Clustered mitochondria protein homolog [OS=Homo sapiens]	0	FALSE	279.738	40	41	138	41	1	1309	146.6	6.13	488.29	41	0	13064.7	12240.1	11032.1	10804.2	12002.3	11435.9		13064.7	13185.8	10663	10551.2	13615.9	13443.4	13125.2	10607.1	0.808145	13529.6	1.03081	0.103619	0.873306	FALSE
FALSE	High	Master Protein	P61978-3	Isoform 3 of Heterogeneous nuclear ribonucleoprotein K [OS=Homo sapiens]	0	FALSE	279.721	62	28	321	2	1	440	48.5	5.54	1116.23	28	30	33471.6	31245.3	30581.1	30848.6	22486.5	22303		33471.6	33659.4	29558	30126.2	25509.6	26218.1	33565.5	29842.1	0.88907	25863.9	0.770549	0.281978	0.00882837	TRUE
FALSE	High	Master Protein	P60174	Triosephosphate isomerase [OS=Homo sapiens]	0	FALSE	279.323	76	19	542	19	1	286	30.8	5.92	2020.06	19	0	48842.3	48238.7	58093.9	58167.4	44640.7	43708.5		48842.3	51965.7	56150.3	56805.2	50642.2	51381.2	50404	56477.7	1.1205	51011.7	1.01206	0.375223	0.876275	TRUE
FALSE	High	Master Protein	P54886	delta-1-pyrroline-5-carboxylate synthase [OS=Homo sapiens]	0	FALSE	279.266	44	28	115	28	1	795	87.2	7.12	403.26	28	0	9235.1	8882.1	8506.3	8644.7	9200.2	9360.3		9235.1	9568.34	8221.71	8442.26	10437.1	11003.4	9401.72	8331.98	0.886219	10720.3	1.14024	0.317573	0.427523	FALSE
FALSE	High	Master Protein	P07602-3	Isoform Sap-mu-9 of Prosaposin [OS=Homo sapiens]	0	FALSE	279.182	57	27	202	1	1	527	58.4	5.14	667.42	27	0	81.9	77.5	273.9	262.3	72.1	66.8		81.9	83.4877	264.736	256.157	81.7931	78.5263	82.6939	260.447	3.14953	80.1597	0.969354	6.72446e-19	0.947963	FALSE
FALSE	High	Master Protein	P46379-3	Isoform 3 of Large proline-rich protein BAG6 [OS=Homo sapiens]	0	FALSE	279.175	30	30	131	30	1	1162	122.3	5.69	467.6	30	0	13946.8	13005	15236.1	15178.4	12283.3	11986.3		13946.8	14009.8	14726.4	14822.9	13934.7	14090.4	13978.3	14774.7	1.05697	14012.5	1.00245	0.741683	0.982981	TRUE
FALSE	High	Master Protein	Q9NSD9	Phenylalanine--tRNA ligase beta subunit [OS=Homo sapiens]	0	FALSE	278.919	58	33	199	33	1	589	66.1	6.84	719.11	33	0	26778.7	24537.2	27642	27357.8	23299.5	22206.2		26778.7	26433	26717.2	26717.1	26431.9	26104.3	26605.8	26717.2	1.00418	26268.1	0.987306	0.947026	0.683198	FALSE
FALSE	High	Master Protein	Q9H3U1	Protein unc-45 homolog A [OS=Homo sapiens]	0	FALSE	278.792	47	40	106	40	1	944	103	6.07	405.15	40	0	13359.7	12501.5	13116.2	12880.4	12065.2	11605.9		13359.7	13467.4	12677.4	12578.8	13687.2	13643.2	13413.5	12628.1	0.941442	13665.2	1.01876	0.566241	0.933112	FALSE
FALSE	High	Master Protein	Q5UIP0	Telomere-associated protein RIF1 [OS=Homo sapiens]	0	FALSE	278.488	21	44	99	44	1	2472	274.3	5.52	360.37	44	0	18407.7	16965.2	16025	16064.7	12869.4	12542		18407.7	18276	15488.9	15688.5	14599.6	14743.7	18341.8	15588.7	0.849898	14671.6	0.799899	0.137313	0.134483	TRUE
FALSE	High	Master Protein	O60716-3	Isoform 1AC of Catenin delta-1 [OS=Homo sapiens]	0	FALSE	278.439	44	32	112	32	1	939	104.9	6.87	407.78	32	0	12209.8	10911.4	6908.1	6846.8	13181.5	12094.1		12209.8	11754.4	6676.98	6686.46	14953.6	14217.1	11982.1	6681.72	0.557641	14585.4	1.21726	0.00056435	0.184002	FALSE
FALSE	High	Master Protein	Q7L2E3-1	Putative ATP-dependent RNA helicase DHX30 [OS=Homo sapiens]	0	FALSE	278.366	46	45	142	45	1	1194	133.9	8.78	457.82	45	0	15405.2	14575.4	11927.6	11811.8	11900.9	11691.9		15405.2	15701.5	11528.5	11535.2	13500.9	13744.3	15553.4	11531.9	0.741439	13622.6	0.875862	0.0304496	0.345495	TRUE
FALSE	High	Master Protein	Q8N3U4-2	Isoform 2 of Cohesin subunit SA-2 [OS=Homo sapiens]	0	FALSE	277.976	33	42	112	35	1	1268	145.7	5.52	350.84	42	8	13066	11629.9	13994.2	13678.6	10039.7	9780.2		13066	12528.4	13526	13358.3	11389.4	11497	12797.2	13442.1	1.05039	11443.2	0.894197	0.770108	0.418048	FALSE
FALSE	High	Master Protein	Q9UNX4	WD repeat-containing protein 3 [OS=Homo sapiens]	0	FALSE	277.514	44	35	110	35	1	943	106	6.64	400.66	35	0	15041.5	13721.6	12070.3	11763.3	10835	10655.4		15041.5	14781.7	11666.5	11487.8	12291.7	12525.9	14911.6	11577.1	0.776384	12408.8	0.832154	0.0596916	0.20705	TRUE
FALSE	High	Master Protein	Q10570	Cleavage and polyadenylation specificity factor subunit 1 [OS=Homo sapiens]	0	FALSE	277.145	33	41	120	41	1	1443	160.8	6.4	395.33	41	0	13573.4	12507.3	13771.2	13176.5	12037.9	11507.6		13573.4	13473.6	13310.5	12867.9	13656.3	13527.7	13523.5	13089.2	0.967884	13592	1.00506	0.756493	0.998161	FALSE
FALSE	High	Master Protein	Q96SI9	spermatid perinuclear RNA-binding protein [OS=Homo sapiens]	0	FALSE	277.026	53	37	141	30	1	672	73.6	8.72	504.72	37	0	16025.1	14718.1	14918.5	15085.6	13931.9	13680.6		16025.1	15855.2	14419.4	14732.3	15804.9	16082.1	15940.2	14575.8	0.91441	15943.5	1.00021	0.399239	0.969969	FALSE
FALSE	High	Master Protein	O60664-1	Perilipin-3 [OS=Homo sapiens]	0	FALSE	277	61	18	120	18	1	434	47	5.44	473.86	18	0	10726.8	10037.1	12463	12139.2	11054.3	10465.5		10726.8	10812.6	12046	11854.9	12540.4	12302.6	10769.7	11950.5	1.10964	12421.5	1.15338	0.52928	0.353416	TRUE
FALSE	High	Master Protein	Q9NZI8	Insulin-like growth factor 2 mRNA-binding protein 1 [OS=Homo sapiens]	0	FALSE	276.433	51	31	376	29	1	577	63.4	9.2	1129.09	31	3	37639.8	33782.5	26916.4	26932.9	30850	29389.8		37639.8	36392.6	26015.9	26302.2	34997.5	34549	37016.2	26159	0.706691	34773.2	0.939406	0.00336358	0.369931	TRUE
FALSE	High	Master Protein	P50748	Kinetochore-associated protein 1 [OS=Homo sapiens]	0	FALSE	276.276	24	50	109	49	1	2209	250.6	5.97	377.26	50	1	13561.1	12680.3	11916.8	11738	12398.1	11463.9		13561.1	13660	11518.1	11463.1	14064.9	13476.3	13610.5	11490.6	0.844243	13770.6	1.01176	0.181175	0.968086	FALSE
FALSE	High	Master Protein	P48147	prolyl endopeptidase [OS=Homo sapiens]	0	FALSE	276.187	59	35	121	35	1	710	80.6	5.86	414.3	35	0	17435.8	15991.4	17491	17427.8	15121.7	14595.8	Acetyl [N-Term]	17435.8	17226.9	16905.8	17019.7	17154.7	17158	17331.4	16962.7	0.978731	17156.3	0.989901	0.839921	0.910239	TRUE
FALSE	High	Master Protein	O14776-1	Transcription elongation regulator 1 [OS=Homo sapiens]	0	FALSE	276.039	36	46	129	46	1	1098	123.8	8.65	422.6	46	0	20980.6	18762.5	17888.5	17821.5	18000	17188.4		20980.6	20212.1	17290	17404.1	20419.9	20205.7	20596.4	17347.1	0.84224	20312.8	0.986233	0.118245	0.675181	TRUE
FALSE	High	Master Protein	P35520-2	Isoform 2 of Cystathionine beta-synthase [OS=Homo sapiens]	0	FALSE	275.984	67	32	129	32	1	565	61.8	6.44	464.86	32	0	17866	16254.3	16172.1	16401.2	12579.4	11793.1		17866	17510.1	15631	16017.1	14270.6	13863.3	17688.1	15824.1	0.894619	14066.9	0.795278	0.298243	0.12594	TRUE
FALSE	High	Master Protein	P09211	Glutathione S-transferase P [OS=Homo sapiens]	0	FALSE	275.672	71	15	684	15	1	210	23.3	5.64	2569.22	15	0	85494.1	84853.4	108178	107303	86175.9	84420		85494.1	91409.3	104559	104790	97761.3	99239.3	88451.7	104675	1.18341	98500.3	1.11361	0.183394	0.580893	TRUE
FALSE	High	Master Protein	P00352	Retinal dehydrogenase 1 [OS=Homo sapiens]	0	FALSE	275.51	54	28	135	25	1	501	54.8	6.73	502.55	28	1	14552.9	13171.7	17757	17729.6	10156.9	9824.8		14552.9	14189.4	17162.9	17314.4	11522.4	11549.5	14371.1	17238.7	1.19953	11535.9	0.802716	0.25418	0.139907	FALSE
FALSE	High	Master Protein	P06753-6	Isoform 6 of Tropomyosin alpha-3 chain [OS=Homo sapiens]	0	FALSE	275.454	71	30	203	1	1	248	28.9	4.75	688.54	30	1	59	74.2	123.2	123.9	61	60.5		59	79.9328	119.078	120.998	69.2008	71.1203	69.4664	120.038	1.72801	70.1606	1.00999	0.00728304	0.81221	TRUE
FALSE	High	Master Protein	Q15020	Squamous cell carcinoma antigen recognized by T-cells 3 [OS=Homo sapiens]	0	FALSE	275.261	48	39	126	38	1	963	109.9	5.57	451.78	39	0	20971.6	19246.6	20141.3	19795.8	11287.9	11116.2		20971.6	20733.6	19467.4	19332.2	12805.4	13067.6	20852.6	19399.8	0.930331	12936.5	0.620378	0.493772	0.00504369	TRUE
FALSE	High	Master Protein	Q9ULU4-13	Isoform 13 of Protein kinase C-binding protein 1 [OS=Homo sapiens]	0	FALSE	274.913	37	36	112	4	1	1188	131.5	6.65	376.03	36	33	12964.5	12002.3	12452.1	12512.5	9767.7	9695.8	Acetyl [N-Term]	12964.5	12929.6	12035.5	12219.5	11080.9	11397.8	12947.1	12127.5	0.936698	11239.3	0.868101	0.534686	0.364318	TRUE
FALSE	High	Master Protein	P00505	Aspartate aminotransferase, mitochondrial [OS=Homo sapiens]	0	FALSE	274.51	56	26	239	26	1	430	47.5	9.01	792.17	26	0	29036.4	27297.6	31417.9	32661.8	24075.7	23843.4		29036.4	29406.6	30366.8	31896.9	27312.4	28028.9	29221.5	31131.8	1.06537	27670.7	0.946928	0.618511	0.412281	FALSE
FALSE	High	Master Protein	Q8NI36	WD repeat-containing protein 36 [OS=Homo sapiens]	0	FALSE	274.444	38	34	108	34	1	951	105.3	7.53	381.01	34	0	18024.5	16355.4	13828.6	13601	12503	12248.9		18024.5	17619	13365.9	13282.5	14183.9	14399.1	17821.8	13324.2	0.747637	14291.5	0.801913	0.0122471	0.138344	TRUE
FALSE	High	Master Protein	Q05086	Ubiquitin-protein ligase E3A [OS=Homo sapiens]	0	FALSE	273.786	34	27	93	27	1	875	100.6	5.22	325.88	27	0	9575	8947.8	11535.4	11313.5	8491.4	8213.4		9575	9639.12	11149.5	11048.6	9632.98	9655.2	9607.06	11099	1.1553	9644.09	1.00385	0.390452	0.91038	TRUE
FALSE	High	Master Protein	P20042	Eukaryotic translation initiation factor 2 subunit 2 [OS=Homo sapiens]	0	FALSE	273.741	70	30	148	30	1	333	38.4	5.8	510.89	30	0	27231.4	24676.4	23323.6	23123.7	24461.2	22958.4		27231.4	26582.9	22543.3	22582.2	27749.8	26988.6	26907.2	22562.7	0.83854	27369.2	1.01717	0.111777	0.917531	FALSE
FALSE	High	Master Protein	P09622	Dihydrolipoyl dehydrogenase, mitochondrial [OS=Homo sapiens]	0	FALSE	273.345	56	22	158	22	1	509	54.1	7.85	592.97	22	0	17536.2	16466.6	19844.6	19908.6	16080.4	16081.7		17536.2	17738.8	19180.7	19442.4	18242.2	18904.7	17637.5	19311.5	1.09491	18573.5	1.05307	0.585505	0.764931	TRUE
FALSE	High	Master Protein	Q9Y230	RuvB-like 2 [OS=Homo sapiens]	0	FALSE	273.19	71	29	202	29	1	463	51.1	5.64	684.02	29	0	21514.9	19952.9	23060	22640.5	16215.9	15663.3		21514.9	21494.5	22288.5	22110.3	18396	18412.9	21504.7	22199.4	1.0323	18404.4	0.855833	0.7912	0.276044	FALSE
FALSE	High	Master Protein	Q9Y485	DmX-like protein 1 [OS=Homo sapiens]	0	FALSE	273.107	19	45	83	43	1	3027	337.6	6.34	291.65	45	2	7159.7	6775.4	8249.1	8071.8	5261.8	5079.8		7159.7	7298.88	7973.11	7882.77	5969.19	5971.52	7229.29	7927.94	1.09664	5970.36	0.825857	0.683974	0.317075	FALSE
FALSE	High	Master Protein	O43314-1	inositol hexakisphosphate and diphosphoinositol-pentakisphosphate kinase 2 [OS=Homo sapiens]	0	FALSE	272.633	37	42	116	37	1	1243	140.3	8.22	385.01	42	5	14586.7	13529.7	14680.3	14553.2	10309.2	10007.4		14586.7	14575	14189.1	14212.4	11695.2	11764.1	14580.9	14200.8	0.973932	11729.6	0.804455	0.802727	0.143339	TRUE
FALSE	High	Master Protein	Q9P2R3-4	Isoform 4 of Rabankyrin-5 [OS=Homo sapiens]	0	FALSE	272.389	31	32	95	32	1	1211	132.7	6.49	389.8	32	0	11184.9	10298	13786.7	13637.4	10970.5	10489.3		11184.9	11093.6	13325.4	13318	12445.4	12330.6	11139.3	13321.7	1.19593	12388	1.1121	0.262825	0.50339	TRUE
FALSE	High	Master Protein	Q12904-2	Isoform 2 of Aminoacyl tRNA synthase complex-interacting multifunctional protein 1 [OS=Homo sapiens]	0	FALSE	272.361	57	18	213	18	1	336	37	8.65	674.23	18	0	19809.6	17847.1	19596.9	19566.3	18142.6	17228.8		19809.6	19226	18941.3	19108.1	20581.7	20253.2	19517.8	19024.7	0.974735	20417.4	1.04609	0.808919	0.904403	FALSE
FALSE	High	Master Protein	Q9P2E9-2	Isoform 1 of Ribosome-binding protein 1 [OS=Homo sapiens]	0	FALSE	272.31	31	35	83	2	1	1407	152.1	8.66	321.13	35	35	10056	9123.6	12547.9	12496.6	11906.5	11209.9		10056	9828.5	12128.1	12204	13507.2	13177.7	9942.25	12166	1.22367	13342.5	1.342	0.20143	0.034804	TRUE
FALSE	High	Master Protein	P39748	Flap endonuclease 1 [OS=Homo sapiens]	0	FALSE	272.133	62	20	150	20	1	380	42.6	8.62	546.48	20	0	18381.9	16796	17620.6	17568.4	15981.6	15281.3		18381.9	18093.7	17031.1	17157	18130.2	17963.8	18237.8	17094	0.937286	18047	0.989538	0.538547	0.908147	TRUE
FALSE	High	Master Protein	Q9NVP1	ATP-dependent RNA helicase DDX18 [OS=Homo sapiens]	0	FALSE	272.078	52	26	191	26	1	670	75.4	9.5	593.07	26	0	19242.4	17511.3	15387.5	15178.2	14831.7	14693.9		19242.4	18864.2	14872.7	14822.8	16825.7	17273.3	19053.3	14847.7	0.779272	17049.5	0.89483	0.0285469	0.420703	TRUE
FALSE	High	Master Protein	P42566-1	epidermal growth factor receptor substrate 15 [OS=Homo sapiens]	0	FALSE	272.049	42	36	120	36	1	896	98.6	4.64	445.27	36	0	12434.9	11815.6	18387.6	18105.4	13925.3	13212.9		12434.9	12728.5	17772.4	17681.4	15797.4	15532.3	12581.7	17726.9	1.40894	15664.9	1.24505	0.019754	0.132895	TRUE
FALSE	High	Master Protein	Q8IWJ2	GRIP and coiled-coil domain-containing protein 2 [OS=Homo sapiens]	0	FALSE	271.976	29	43	91	42	1	1684	195.8	5.14	315.6	43	1	11355.7	10468	12090.7	11758.5	9877.3	9388.8		11355.7	11276.8	11686.2	11483.1	11205.2	11036.9	11316.2	11584.7	1.02372	11121.1	0.982753	0.937305	0.994242	FALSE
FALSE	High	Master Protein	Q9UJS0	Calcium-binding mitochondrial carrier protein Aralar2 [OS=Homo sapiens]	0	FALSE	271.913	52	30	134	21	1	675	74.1	8.62	507.88	30	9	17908.2	17875.3	23785.8	24534.1	16651	16931.2		17908.2	19256.4	22990	23959.6	18889.6	19903.4	18582.3	23474.8	1.26329	19396.5	1.04381	0.0582661	0.809558	TRUE
FALSE	High	Master Protein	Q5VT25-6	Isoform 6 of Serine/threonine-protein kinase MRCK alpha [OS=Homo sapiens]	0	FALSE	271.808	30	46	103	38	1	1781	202.7	6.51	378.23	46	8	11158.8	10394.4	10810.1	10626.4	8623.8	8289.7		11158.8	11197.5	10448.4	10377.5	9783.18	9744.9	11178.1	10413	0.931549	9764.04	0.873494	0.525572	0.387616	TRUE
FALSE	High	Master Protein	O75955	Flotillin-1 [OS=Homo sapiens]	0	FALSE	271.698	70	24	118	24	1	427	47.3	7.49	503.47	24	0	11440.9	10895.3	16997.8	16703.9	11219.2	11153.3		11440.9	11737.1	16429.1	16312.7	12727.5	13111.2	11589	16370.9	1.41263	12919.3	1.11479	0.0186766	0.492682	TRUE
FALSE	High	Master Protein	Q93034	Cullin-5 [OS=Homo sapiens]	0	FALSE	271.281	43	33	109	33	1	780	90.9	7.94	407	33	0	15345.3	14514	16127	15417.8	10677.6	10188.7		15345.3	15635.4	15587.4	15056.7	12113.1	11977.3	15490.3	15322.1	0.989139	12045.2	0.777593	0.921713	0.0970906	TRUE
FALSE	High	Master Protein	P41091	eukaryotic translation initiation factor 2 subunit 3 [OS=Homo sapiens]	0	FALSE	271.255	53	25	190	25	1	472	51.1	8.4	697.48	25	0	28788.6	26279.6	25129	24953.2	24691.8	23750.4		28788.6	28310	24288.3	24368.8	28011.4	27919.6	28549.3	24328.6	0.852159	27965.5	0.979551	0.146608	0.62612	TRUE
FALSE	High	Master Protein	O43242	26S proteasome non-ATPase regulatory subunit 3 [OS=Homo sapiens]	0	FALSE	270.827	69	43	184	43	1	534	60.9	8.44	602.83	43	0	26070.7	24473.9	25432.4	24877.8	22912.3	21292.1		26070.7	26364.8	24581.5	24295.2	25992.6	25029.8	26217.7	24438.4	0.932131	25511.2	0.973051	0.523762	0.579934	TRUE
FALSE	High	Master Protein	Q5JSH3	WD repeat-containing protein 44 [OS=Homo sapiens]	0	FALSE	270.668	40	34	85	34	1	913	101.3	5.45	327.54	34	0	13534.6	12612.1	14002.2	13750.2	12710.5	12136.8		13534.6	13586.5	13533.7	13428.2	14419.3	14267.3	13560.6	13481	0.99413	14343.3	1.05772	0.961287	0.742759	FALSE
FALSE	High	Master Protein	Q14157-5	Isoform 5 of Ubiquitin-associated protein 2-like [OS=Homo sapiens]	0	FALSE	270.331	30	23	121	1	1	1104	116.6	7.02	476.87	23	27	11311.3	10386.5	9761.3	9566.6	9638.7	9037		11311.3	11189	9434.72	9342.57	10934.5	10623.4	11250.1	9388.64	0.834536	10779	0.958117	0.156998	0.852577	TRUE
FALSE	High	Master Protein	Q99714-1	3-hydroxyacyl-CoA dehydrogenase type-2 [OS=Homo sapiens]	0	FALSE	270.022	79	17	164	17	1	261	26.9	7.78	722.32	17	0	12268.7	11759.5	17901.8	18079.3	15484.4	15674.2		12268.7	12668.1	17302.9	17655.9	17566.1	18425.7	12468.4	17479.4	1.4019	17995.9	1.44332	0.0219681	0.00603326	TRUE
FALSE	High	Master Protein	Q9C0J8	pre-mRNA 3' end processing protein WDR33 [OS=Homo sapiens]	0	FALSE	270.005	28	30	125	29	1	1336	145.8	9.17	440.01	30	0	8446.8	7706.7	8264.5	8344.1	7059.5	6857.3		8446.8	8302.13	7988	8148.69	8008.58	8061.05	8374.46	8068.35	0.963446	8034.81	0.959442	0.699649	0.860909	TRUE
FALSE	High	Master Protein	Q12788	Transducin beta-like protein 3 [OS=Homo sapiens]	0	FALSE	269.611	49	30	131	30	1	808	89	6.9	549.56	30	0	13290.8	12587.1	10748.5	10598.7	9731.6	9767.9		13290.8	13559.6	10388.9	10350.5	11039.9	11482.6	13425.2	10369.7	0.772405	11261.2	0.838814	0.0554833	0.253517	TRUE
FALSE	High	Master Protein	O60231	Putative pre-mRNA-splicing factor ATP-dependent RNA helicase DHX16 [OS=Homo sapiens]	0	FALSE	269.588	35	34	122	32	1	1041	119.2	6.8	400.62	34	1	12851	12101.5	14317.4	14047.8	11017.9	10713.7		12851	13036.5	13838.4	13718.8	12499.1	12594.4	12943.7	13778.6	1.0645	12546.8	0.969332	0.709569	0.792894	FALSE
FALSE	High	Master Protein	Q9BUQ8	Probable ATP-dependent RNA helicase DDX23 [OS=Homo sapiens]	0	FALSE	269.171	47	35	179	35	1	820	95.5	9.55	552.38	35	0	23765.7	21516.5	23456.9	22948.4	20199.4	19281.7		23765.7	23178.9	22672.1	22411	22915	22666.5	23472.3	22541.6	0.960347	22790.7	0.970963	0.72609	0.565445	TRUE
FALSE	High	Master Protein	P17858-1	ATP-dependent 6-phosphofructokinase, liver type [OS=Homo sapiens]	0	FALSE	268.939	36	26	177	22	1	780	85	7.5	603.63	26	0	13495.1	12600	12290.7	12145.7	9285.6	8804.1		13495.1	13573.5	11879.5	11861.3	10534	10349.6	13534.3	11870.4	0.877059	10441.8	0.771505	0.224292	0.0927195	TRUE
FALSE	High	Master Protein	Q6KC79	Nipped-B-like protein [OS=Homo sapiens]	0	FALSE	268.79	18	45	114	45	1	2804	315.9	7.91	362.19	45	0	12366.9	11311.8	11311.2	11042	9573.4	9330.8		12366.9	12185.8	10932.8	10783.4	10860.4	10968.8	12276.3	10858.1	0.884474	10914.6	0.889077	0.310822	0.459859	TRUE
FALSE	High	Master Protein	Q15643	Thyroid receptor-interacting protein 11 [OS=Homo sapiens]	0	FALSE	268.763	27	46	79	45	1	1979	227.4	5.26	323.81	46	0	9386.3	8641.4	11621.3	11533.4	9479.9	9167.4		9386.3	9309.05	11232.5	11263.3	10754.4	10776.7	9347.67	11247.9	1.20328	10765.5	1.15168	0.252908	0.395032	TRUE
FALSE	High	Master Protein	O94906-1	Pre-mRNA-processing factor 6 [OS=Homo sapiens]	0	FALSE	268.611	42	38	115	38	1	941	106.9	8.25	383.9	38	0	21244.6	18938.7	21474.1	21181.5	16573.2	16136.6		21244.6	20401.9	20755.7	20685.5	18801.3	18969.3	20823.3	20720.6	0.995068	18885.3	0.906932	0.998284	0.473338	TRUE
FALSE	High	Master Protein	Q5THJ4	Vacuolar protein sorting-associated protein 13D [OS=Homo sapiens]	0	FALSE	268.576	14	54	101	54	1	4388	491.6	6.58	329.5	54	0	9211.9	8807.7	8905.3	8733.7	11246.8	10830.1		9211.9	9488.19	8607.36	8529.17	12758.8	12731.2	9350.05	8568.27	0.916387	12745	1.3631	0.449197	0.0249005	FALSE
FALSE	High	Master Protein	Q92888-3	Isoform 3 of Rho guanine nucleotide exchange factor 1 [OS=Homo sapiens]	0	FALSE	268.258	41	36	125	36	1	927	104	5.62	455.6	36	0	16893.9	15548.2	14423.5	14202.8	11554.5	11143.5		16893.9	16749.5	13940.9	13870.2	13107.9	13099.7	16821.7	13905.6	0.826645	13103.8	0.778981	0.0858708	0.0991446	TRUE
FALSE	High	Master Protein	P22059	Oxysterol-binding protein 1 [OS=Homo sapiens]	0	FALSE	268.084	40	32	174	29	1	807	89.4	7.3	570.33	32	6	16064.1	15018.9	16584.1	16288.9	17860.5	17130.9		16064.1	16179.3	16029.3	15907.4	20261.7	20138.1	16121.7	15968.3	0.990488	20199.9	1.25296	0.932398	0.148806	FALSE
FALSE	High	Master Protein	Q15365	Poly(RC)-binding protein 1 [OS=Homo sapiens]	0	FALSE	267.873	74	19	389	12	1	356	37.5	7.09	1493.99	19	0	18295.1	17529.6	19193.7	18785.7	18156.6	17680.6		18295.1	18884	18551.5	18345.8	20597.6	20784.3	18589.5	18448.7	0.992422	20690.9	1.11304	0.947728	0.583366	FALSE
FALSE	High	Master Protein	O00425	Insulin-like growth factor 2 mRNA-binding protein 3 [OS=Homo sapiens]	0	FALSE	267.799	50	27	282	24	1	579	63.7	8.87	944.2	27	1	32192.5	28679.3	17945.3	17895	13797.4	13346.8		32192.5	30895.1	17344.9	17475.9	15652.3	15689.7	31543.8	17410.4	0.551944	15671	0.496802	8.38539e-06	0.000211956	TRUE
FALSE	High	Master Protein	Q9Y263	Phospholipase A-2-activating protein [OS=Homo sapiens]	0	FALSE	267.738	46	26	112	26	1	795	87.1	6.37	409.41	26	0	10388.4	9922.5	11279.5	10877.8	11676.3	11078.3		10388.4	10689.1	10902.1	10623.1	13246.1	13023	10538.8	10762.6	1.02124	13134.5	1.24631	0.949015	0.130877	TRUE
FALSE	High	Master Protein	Q14151	scaffold attachment factor B2 [OS=Homo sapiens]	0	FALSE	267.619	31	35	116	21	1	953	107.4	6.16	434.32	35	14	22434	20176.7	19805.3	19808.1	20055.2	19470.8		22434	21735.6	19142.7	19344.2	22751.4	22888.8	22084.8	19243.5	0.871344	22820.1	1.03329	0.20332	0.969525	FALSE
FALSE	High	Master Protein	Q8TEM1-1	Nuclear pore membrane glycoprotein 210 [OS=Homo sapiens]	0	FALSE	267.247	22	35	136	35	1	1887	205	6.81	483.18	35	0	18641.8	17441.6	19033.6	19179	15828.5	15280.5		18641.8	18789.2	18396.8	18729.9	17956.5	17962.9	18715.5	18563.3	0.99187	17959.7	0.959616	0.943353	0.738894	TRUE
FALSE	High	Master Protein	O14777	Kinetochore protein NDC80 homolog [OS=Homo sapiens]	0	FALSE	266.984	56	37	107	37	1	642	73.9	5.6	364.49	37	0	15730.3	14339.8	17276.4	17024.1	8523.8	8138.1		15730.3	15447.7	16698.4	16625.4	9669.73	9566.69	15589	16661.9	1.06882	9618.21	0.616987	0.691349	0.00350672	FALSE
FALSE	High	Master Protein	O14976	Cyclin-G-associated kinase [OS=Homo sapiens]	0	FALSE	266.953	33	37	120	37	1	1311	143.1	5.73	399.45	37	0	12052.4	10919.3	12068.6	12032.7	11737.4	11175.1		12052.4	11762.9	11664.8	11750.9	13315.4	13136.8	11907.7	11707.9	0.983221	13226.1	1.11072	0.826583	0.50893	FALSE
FALSE	High	Master Protein	Q99459	Cell division cycle 5-like protein [OS=Homo sapiens]	0	FALSE	266.836	57	37	119	37	1	802	92.2	8.18	456.37	37	0	20467	18925.7	21531.4	21027.9	17827	17634.1		20467	20387.9	20811	20535.5	20223.7	20729.6	20427.5	20673.2	1.01203	20476.6	1.00241	0.903068	0.799423	TRUE
FALSE	High	Master Protein	Q14157-1	Isoform 2 of Ubiquitin-associated protein 2-like [OS=Homo sapiens]	0	FALSE	266.488	33	23	122	1	1	983	103.9	6.98	471.07	23	0	657.5	509.1	481.5	508	474.7	434.5		657.5	548.434	465.391	496.103	538.518	510.773	602.967	480.747	0.797303	524.646	0.870107	0.233157	0.580472	TRUE
FALSE	High	Master Protein	O75400	pre-mRNA-processing factor 40 homolog A [OS=Homo sapiens]	0	FALSE	266.485	25	29	143	26	1	957	108.7	7.56	501.69	29	3	19694.3	17806.4	19659.3	19495.1	18704	18251.1		19694.3	19182.1	19001.6	19038.6	21218.6	21455	19438.2	19020.1	0.978488	21336.8	1.09767	0.838025	0.652628	FALSE
FALSE	High	Master Protein	Q96K76-4	Isoform 4 of Ubiquitin carboxyl-terminal hydrolase 47 [OS=Homo sapiens]	0	FALSE	266.404	32	41	108	41	1	1355	154.6	5.06	372.14	41	0	15490.1	14418.8	16450.9	16126.1	15046.5	14103		15490.1	15532.8	15900.5	15748.5	17069.3	16578.7	15511.5	15824.5	1.02018	16824	1.08462	0.904143	0.619299	TRUE
FALSE	High	Master Protein	Q99873	protein arginine N-methyltransferase 1 [OS=Homo sapiens]	0	FALSE	266.086	59	22	154	22	1	361	41.5	5.43	618.63	22	0	23534.9	22231.4	22488.7	21707.3	19713.9	19074.3		23534.9	23949	21736.3	21199	22364.2	22422.7	23742	21467.6	0.904206	22393.4	0.943201	0.356626	0.39095	TRUE
FALSE	High	Master Protein	Q15042-3	Isoform 2 of Rab3 GTPase-activating protein catalytic subunit [OS=Homo sapiens]	0	FALSE	265.705	40	34	99	34	1	988	111.2	5.45	343.11	34	0	12031.1	11023.5	13731	13510	10939.7	10352.7		12031.1	11875.2	13271.6	13193.6	12410.4	12170	11953.1	13232.6	1.10704	12290.2	1.0282	0.539	0.886211	TRUE
FALSE	High	Master Protein	O15294	UDP-N-acetylglucosamine--peptide N-acetylglucosaminyltransferase 110 kDa subunit [OS=Homo sapiens]	0	FALSE	265.335	41	34	95	34	1	1046	116.9	6.7	372.12	34	0	9850.4	9218.1	10180	10166.3	7420.3	7276		9850.4	9930.3	9839.41	9928.22	8417.88	8553.25	9890.35	9883.82	0.999339	8485.57	0.857964	0.928751	0.322959	TRUE
FALSE	High	Master Protein	Q12840	Kinesin heavy chain isoform 5A [OS=Homo sapiens]	0	FALSE	265.315	43	37	109	25	1	1032	117.3	5.9	417.41	37	4	5809.9	5618.2	13123.6	12921.8	8205.3	7829		5809.9	6052.27	12684.5	12619.2	9308.42	9203.33	5931.08	12651.9	2.13314	9255.87	1.56057	1.12686e-10	0.00383063	TRUE
FALSE	High	Master Protein	P51692	Signal transducer and activator of transcription 5B [OS=Homo sapiens]	0	FALSE	265.094	37	26	148	6	1	787	89.8	6.05	534.99	26	0	1987.2	1905.2	1662.5	1651	1674.4	1691.8		1987.2	2052.4	1606.88	1612.34	1899.51	1988.78	2019.8	1609.61	0.796915	1944.14	0.962543	0.205726	0.920477	TRUE
FALSE	High	Master Protein	P45974-1	Ubiquitin carboxyl-terminal hydrolase 5 [OS=Homo sapiens]	0	FALSE	264.122	45	33	121	30	1	858	95.7	5.03	424.5	33	3	16074.8	14842.2	16675.4	16538.1	15112.9	14252.7		16074.8	15988.9	16117.5	16150.8	17144.7	16754.7	16031.9	16134.2	1.00638	16949.7	1.05725	0.96653	0.745006	TRUE
FALSE	High	Master Protein	Q12830-1	Nucleosome-remodeling factor subunit BPTF [OS=Homo sapiens]	0	FALSE	264.095	16	42	108	41	1	3046	338.1	6.54	339.66	42	0	9346.2	8431.7	12041.4	11627.4	8465	8004.4		9346.2	9083.14	11638.5	11355.1	9603.03	9409.52	9214.67	11496.8	1.24766	9506.27	1.03165	0.159588	0.801586	TRUE
FALSE	High	Master Protein	P08195-4	Isoform 4 of 4F2 cell-surface antigen heavy chain [OS=Homo sapiens]	0	FALSE	263.989	41	28	158	28	1	661	71.1	4.97	557.15	28	0	16190.5	15536.4	11907.5	11996.4	23012	22577.7		16190.5	16736.8	11509.1	11715.5	26105.7	26541.1	16463.6	11612.3	0.70533	26323.4	1.59888	0.0141008	0.000255059	FALSE
FALSE	High	Master Protein	Q9H583	HEAT repeat-containing protein 1 [OS=Homo sapiens]	0	FALSE	263.808	23	47	133	47	1	2144	242.2	6.54	432.28	47	0	18338.6	16868.1	14342	14018	11001.5	10983.7		18338.6	18171.4	13862.2	13689.7	12480.5	12911.8	18255	13775.9	0.754641	12696.2	0.695491	0.0148856	0.024	TRUE
FALSE	High	Master Protein	Q8NG31-1	kinetochore scaffold 1 [OS=Homo sapiens]	0	FALSE	263.767	25	43	78	43	1	2342	265.2	5.47	286.68	43	0	9880.5	9106.2	10347.3	10172.7	7027.8	6819.5		9880.5	9809.76	10001.1	9934.47	7972.61	8016.61	9845.13	9967.79	1.01246	7994.61	0.812038	0.990513	0.174966	FALSE
FALSE	High	Master Protein	P21359-1	Neurofibromin [OS=Homo sapiens]	0	FALSE	263.422	18	49	106	49	1	2839	319.2	7.39	322.27	49	0	11532.8	10689.4	14024	13772.4	7751	7453.2		11532.8	11515.3	13554.8	13449.9	8793.04	8761.56	11524	13502.3	1.17167	8777.3	0.761651	0.326197	0.0783767	FALSE
FALSE	High	Master Protein	Q9Y5L0-1	Isoform 1 of Transportin-3 [OS=Homo sapiens]	0	FALSE	263.172	36	30	121	30	1	957	107.9	5.71	415.02	30	0	16105.7	14538.6	16367.4	16318.8	15626.5	14958.8		16105.7	15661.9	15819.8	15936.6	17727.3	17584.7	15883.8	15878.2	0.99965	17656	1.11157	0.997055	0.505499	FALSE
FALSE	High	Master Protein	P08397-1	porphobilinogen deaminase [OS=Homo sapiens]	0	FALSE	263.16	61	22	177	22	1	361	39.3	7.18	712.28	22	0	22615.1	21488.2	27655.1	27774.6	19986.9	19671		22615.1	23148.4	26729.9	27124.2	22673.9	23124.1	22881.8	26927	1.17679	22899	1.00075	0.199252	0.786426	TRUE
FALSE	High	Master Protein	O14646	Chromodomain-helicase-DNA-binding protein 1 [OS=Homo sapiens]	0	FALSE	263.149	29	47	126	35	1	1710	196.6	7.14	422.32	47	12	16933.1	15348.4	16997.1	16741.1	11298.1	11077.6		16933.1	16534.2	16428.4	16349.1	12817	13022.2	16733.7	16388.7	0.979387	12919.6	0.772072	0.845037	0.0892562	TRUE
FALSE	High	Master Protein	P23528	Cofilin-1 [OS=Homo sapiens]	0	FALSE	262.144	76	21	399	16	1	166	18.5	8.09	1357.12	21	6	55128.2	50379.9	60590.3	61112.3	46026.6	44046.2		55128.2	54272.3	58563.2	59681.2	52214.4	51778.2	54700.3	59122.2	1.08084	51996.3	0.950568	0.543835	0.433763	FALSE
FALSE	High	Master Protein	O00148	ATP-dependent RNA helicase DDX39A [OS=Homo sapiens]	0	FALSE	262.133	59	25	167	14	1	427	49.1	5.68	597.42	25	11	19583.2	18623.5	21247	20845.8	19066.5	18830		19583.2	20062.4	20536.1	20357.6	21629.8	22135.5	19822.8	20446.9	1.03148	21882.6	1.10391	0.795662	0.624091	TRUE
FALSE	High	Master Protein	P06753-3	Isoform 3 of Tropomyosin alpha-3 chain [OS=Homo sapiens]	0	FALSE	261.945	62	29	202	1	1	247	28.9	4.81	679.96	29	0	328.8	302.1	622.3	628.6	295.9	287.7		328.8	325.441	601.48	613.879	335.681	338.204	327.12	607.68	1.85766	336.942	1.03003	0.000895773	0.741692	TRUE
FALSE	High	Master Protein	P42224-1	Signal transducer and activator of transcription 1-alpha/beta [OS=Homo sapiens]	0	FALSE	261.536	42	32	109	32	1	750	87.3	6.05	405.13	32	0	13671.3	12756.2	16009.4	15630.4	9652.5	9228.6		13671.3	13741.8	15473.8	15264.4	10950.2	10848.6	13706.5	15369.1	1.1213	10899.4	0.795197	0.486816	0.135865	FALSE
FALSE	High	Master Protein	Q7LBC6-1	Lysine-specific demethylase 3B [OS=Homo sapiens]	0	FALSE	261.164	34	42	90	40	1	1761	191.5	7.18	324.75	42	2	12811	11523.7	13436	13575.9	6615.2	6435.9		12811	12414	12986.5	13258	7504.54	7565.68	12612.5	13122.2	1.04041	7535.11	0.597431	0.813841	0.00889669	FALSE
FALSE	High	Master Protein	P30043	flavin reductase (NADPH) [OS=Homo sapiens]	0	FALSE	260.832	86	14	531	14	1	206	22.1	7.65	2054.72	14	0	31432.3	28904.6	44540.5	44449.9	29539.6	28873.2		31432.3	31137.8	43050.3	43409	33510.9	33941.7	31285.1	43229.6	1.3818	33726.3	1.07803	0.00634406	0.74559	TRUE
FALSE	High	Master Protein	O95202-1	LETM1 and EF-hand domain-containing protein 1, mitochondrial [OS=Homo sapiens]	0	FALSE	260.811	43	27	92	27	1	739	83.3	6.7	387.74	27	0	12135.8	11806.1	12258.9	12161.5	12185.7	12067.1		12135.8	12718.3	11848.8	11876.7	13823.9	14185.4	12427	11862.7	0.954591	14004.7	1.12695	0.658083	0.445892	FALSE
FALSE	High	Master Protein	O76021	Ribosomal L1 domain-containing protein 1 [OS=Homo sapiens]	0	FALSE	260.749	43	31	116	31	1	490	54.9	10.13	435.67	31	0	26801.8	24305.6	19679.7	19686.3	15727.2	15806.2		26801.8	26183.5	19021.3	19225.3	17841.6	18580.9	26492.6	19123.3	0.721834	18211.2	0.687406	0.0057434	0.0205574	TRUE
FALSE	High	Master Protein	Q7L2H7	Eukaryotic translation initiation factor 3 subunit M [OS=Homo sapiens]	0	FALSE	260.41	50	20	116	20	1	374	42.5	5.63	442.42	20	0	13577.3	12995	13838.6	13601.5	15425.5	14703		13577.3	13999	13375.6	13283	17499.3	17284	13788.2	13329.3	0.96672	17391.7	1.26135	0.747691	0.108504	FALSE
FALSE	High	Master Protein	P12081	Histidine--tRNA ligase, cytoplasmic [OS=Homo sapiens]	0	FALSE	260.256	62	34	145	27	1	509	57.4	5.88	485.68	34	8	18793.2	17431.8	20686.4	19855	21216.4	19892.9		18793.2	18778.6	19994.3	19390	24068.7	23385	18785.9	19692.2	1.04824	23726.8	1.26301	0.779485	0.131538	TRUE
FALSE	High	Master Protein	P18669	Phosphoglycerate mutase 1 [OS=Homo sapiens]	0	FALSE	260.238	80	19	266	19	1	254	28.8	7.18	875.31	19	0	29805.9	28079.5	32410.8	32357.2	26795	25643.6		29805.9	30249	31326.4	31599.4	30397.3	30145.2	30027.4	31462.9	1.04781	30271.2	1.00812	0.708347	0.84473	TRUE
FALSE	High	Master Protein	Q86UV5	Ubiquitin carboxyl-terminal hydrolase 48 [OS=Homo sapiens]	0	FALSE	260.08	42	37	122	24	1	1035	119	6.05	415.88	37	13	12589.8	11795.7	15531.1	14730.1	10376.2	9991.2		12589.8	12707.1	15011.5	14385.1	11771.2	11745.1	12648.4	14698.3	1.16207	11758.1	0.929612	0.353817	0.581043	FALSE
FALSE	High	Master Protein	Q96PZ0	pseudouridylate synthase 7 homolog [OS=Homo sapiens]	0	FALSE	259.772	59	32	110	32	1	661	75	6.37	415.58	32	0	18438.2	16998.1	16214.2	16037.5	14113	13518.4		18438.2	18311.4	15671.7	15661.9	16010.3	15891.5	18374.8	15666.8	0.852626	15950.9	0.868086	0.144652	0.317311	TRUE
FALSE	High	Master Protein	Q9ULV4-3	Isoform 3 of Coronin-1C [OS=Homo sapiens]	0	FALSE	259.755	48	26	273	25	1	527	58.9	7.75	844.66	26	3	27334.5	24882.6	27421.6	27665.6	26979.8	26096.1		27334.5	26805.1	26504.2	27017.7	30606.9	30677.1	27069.8	26760.9	0.988591	30642	1.13196	0.949907	0.503148	FALSE
FALSE	High	Master Protein	Q8NFD5-3	Isoform 3 of AT-rich interactive domain-containing protein 1B [OS=Homo sapiens]	0	FALSE	259.482	23	36	96	33	1	2289	241.3	6.67	357.28	36	0	8095.7	7472.2	8076.1	7900.2	6292.8	6047.1		8095.7	8049.51	7805.9	7715.19	7138.8	7108.63	8072.61	7760.55	0.961343	7123.71	0.882455	0.687931	0.54837	TRUE
FALSE	High	Master Protein	Q99570	Phosphoinositide 3-kinase regulatory subunit 4 [OS=Homo sapiens]	0	FALSE	259.23	29	37	85	37	1	1358	153	7.17	310.77	37	0	8805.7	8251	9249.8	9068.1	7423.4	7006		8805.7	8888.48	8940.33	8855.74	8421.4	8235.85	8847.09	8898.04	1.00576	8328.63	0.941397	0.969866	0.749107	FALSE
FALSE	High	Master Protein	Q13045-2	Isoform 2 of Protein flightless-1 homolog [OS=Homo sapiens]	0	FALSE	259.227	35	38	103	2	1	1214	138.4	6.07	391.33	38	0	439.3	432.9	520.9	541.8	394.4	353		439.3	466.346	503.473	529.112	447.423	414.967	452.823	516.292	1.14016	431.195	0.952236	0.520667	0.932518	FALSE
FALSE	High	Master Protein	P30622-3	CAP-Gly domain-containing linker protein 1 [OS=Homo sapiens]	0	FALSE	259.034	32	40	92	34	1	1438	162.1	5.36	343.89	40	6	8659.3	7879.7	11628	11471.4	10418.3	9733.6		8659.3	8488.5	11239	11202.8	11818.9	11442.3	8573.9	11220.9	1.30872	11630.6	1.35651	0.0769798	0.0276901	TRUE
FALSE	High	Master Protein	Q01581	hydroxymethylglutaryl-CoA synthase, cytoplasmic [OS=Homo sapiens]	0	FALSE	258.968	57	25	100	25	1	520	57.3	5.41	385.52	25	0	13858.1	13296.4	20026.5	19562.9	17106.9	16261.9		13858.1	14323.7	19356.5	19104.8	19406.7	19116.6	14090.9	19230.6	1.36476	19261.7	1.36696	0.0375511	0.0233817	TRUE
FALSE	High	Master Protein	Q9Y2X3	Nucleolar protein 58 [OS=Homo sapiens]	0	FALSE	258.939	52	25	113	25	1	529	59.5	8.92	413.03	25	0	14056.9	12840.8	13349.5	12827.5	12758.5	12286.3		14056.9	13832.9	12902.9	12527.1	14473.7	14443.1	13944.9	12715	0.911802	14458.4	1.03682	0.384863	0.843696	FALSE
FALSE	High	Master Protein	Q9UBF2	Coatomer subunit gamma-2 [OS=Homo sapiens]	0	FALSE	258.866	52	33	109	29	1	871	97.6	5.81	391.89	33	0	13183.4	12035.7	15924.7	15697.3	11096.8	10658		13183.4	12965.6	15391.9	15329.7	12588.6	12528.9	13074.5	15360.8	1.17487	12558.8	0.960556	0.317311	0.744068	FALSE
FALSE	High	Master Protein	P49189	4-trimethylaminobutyraldehyde dehydrogenase [OS=Homo sapiens]	0	FALSE	258.69	59	25	197	25	1	494	53.8	5.87	630.8	25	0	18117.6	16616.9	23960.1	23713.3	13895.4	13319.1		18117.6	17900.7	23158.5	23158	15763.5	15657.2	18009.2	23158.2	1.28591	15710.3	0.872352	0.040049	0.332581	FALSE
FALSE	High	Master Protein	Q96Q15-1	Serine/threonine-protein kinase SMG1 [OS=Homo sapiens]	0	FALSE	258.462	16	52	93	52	1	3661	410.2	6.46	294.27	52	0	9117.6	8728.8	9625.6	9198.9	9649.5	9089.1		9117.6	9403.2	9303.56	8983.48	10946.8	10684.6	9260.4	9143.52	0.987378	10815.7	1.16795	0.852727	0.351459	FALSE
FALSE	High	Master Protein	Q96D46	60S ribosomal export protein NMD3 [OS=Homo sapiens]	0	FALSE	258.281	57	27	100	27	1	503	57.6	7.14	370.65	27	0	10350.7	9509.8	8796.8	8583.7	9918.9	9374.6		10350.7	10244.5	8502.49	8382.68	11252.4	11020.2	10297.6	8442.59	0.819858	11136.3	1.08145	0.125197	0.61714	FALSE
FALSE	High	Master Protein	Q9Y2L1-1	exosome complex exonuclease RRP44 [OS=Homo sapiens]	0	FALSE	258.045	46	38	98	38	1	958	108.9	7.14	332.01	38	0	11135.4	10155.4	10553.8	10455.4	9782.7	9295.7		11135.4	10940	10200.7	10210.6	11097.9	10927.5	11037.7	10205.6	0.924615	11012.7	0.997733	0.489838	0.934648	TRUE
FALSE	High	Master Protein	P69905	Hemoglobin subunit alpha [OS=Homo sapiens]	0	FALSE	257.706	92	12	433	8	1	142	15.2	8.68	1375.84	12	4	26467.9	26126.2	45887.5	43707.1	34019.3	33178.2		26467.9	28144.7	44352.3	42683.6	38592.8	39002.4	27306.3	43517.9	1.59369	38797.6	1.42083	2.40251e-05	0.0118071	TRUE
FALSE	High	Master Protein	P00491	purine nucleoside phosphorylase [OS=Homo sapiens]	0	FALSE	257.57	82	20	160	20	1	289	32.1	6.95	623.36	20	0	16483.6	15712.4	18249.5	17562.5	17817.8	17178		16483.6	16926.4	17638.9	17151.2	20213.2	20193.5	16705	17395.1	1.04131	20203.3	1.20942	0.809881	0.243957	TRUE
FALSE	High	Master Protein	Q9Y4D8-1	Probable E3 ubiquitin-protein ligase HECTD4 [OS=Homo sapiens]	0	FALSE	257.307	15	51	90	40	1	3996	439.1	6.19	305.77	51	10	9355.5	8750.4	14071	13785.5	8143.3	7704.2		9355.5	9426.47	13600.2	13462.7	9238.08	9056.62	9390.98	13531.4	1.4409	9147.35	0.974057	0.0119818	0.953665	FALSE
FALSE	High	Master Protein	Q9Y5X1	Sorting nexin-9 [OS=Homo sapiens]	0	FALSE	257.269	60	29	94	29	1	595	66.6	5.58	393.42	29	0	9406.7	8667.9	13312.3	13099.7	9354.6	8822.4		9406.7	9337.59	12866.9	12792.9	10612.2	10371.1	9372.15	12829.9	1.36894	10491.7	1.11945	0.0354198	0.490419	TRUE
FALSE	High	Master Protein	Q9HAU5	Regulator of nonsense transcripts 2 [OS=Homo sapiens]	0	FALSE	256.917	34	39	113	39	1	1272	147.7	5.69	358.61	39	0	14225.2	13235.1	14305.5	13995.6	13305.8	12372.7		14225.2	14257.7	13826.9	13667.8	15094.6	14544.6	14241.4	13747.4	0.965308	14819.6	1.0406	0.737051	0.825215	FALSE
FALSE	High	Master Protein	Q16181	Septin-7 [OS=Homo sapiens]	0	FALSE	256.302	55	24	95	22	1	437	50.6	8.63	433.21	24	2	13596.5	12818.3	17445.9	17302.2	10340.6	10205		13596.5	13808.7	16862.2	16897	11730.8	11996.4	13702.6	16879.6	1.23186	11863.6	0.865793	0.185488	0.309297	FALSE
FALSE	High	Master Protein	Q09161	Nuclear cap-binding protein subunit 1 [OS=Homo sapiens]	0	FALSE	255.246	36	24	111	24	1	790	91.8	6.43	433.04	24	0	14609.3	13597	15414.9	14764.6	12826.7	12288.2		14609.3	14647.5	14899.2	14418.8	14551.1	14445.3	14628.4	14659	1.00209	14498.2	0.991099	0.985979	0.917166	FALSE
FALSE	High	Master Protein	P69892	Hemoglobin subunit gamma-2 [OS=Homo sapiens]	0	FALSE	255.194	93	16	622	1	1	147	16.1	7.2	2224.53	16	0	15868.4	15593.2	16780.5	16608.9	15861.3	15312.4		15868.4	16798	16219.1	16219.9	17993.7	18000.4	16333.2	16219.5	0.993041	17997	1.10187	0.952642	0.545171	FALSE
FALSE	High	Master Protein	Q14676	Mediator of DNA damage checkpoint protein 1 [OS=Homo sapiens]	0	FALSE	255.138	30	37	94	37	1	2089	226.5	5.47	360.93	37	0	8705.3	8030.1	10020.7	9427.2	7406.5	7152.2		8705.3	8650.52	9685.44	9206.43	8402.23	8407.72	8677.91	9445.94	1.0885	8404.97	0.968548	0.64353	0.918562	FALSE
FALSE	High	Master Protein	P69891	Hemoglobin subunit gamma-1 [OS=Homo sapiens]	0	FALSE	255.094	93	16	562	1	1	147	16.1	7.2	2035.51	16	13	56387	59545	63336	62311	58879.7	58915.9		56387	64145.5	61217	60851.8	66795.5	69258.2	60266.3	61034.4	1.01275	68026.8	1.12877	0.899084	0.516264	TRUE
FALSE	High	Master Protein	Q9UGI8	Testin [OS=Homo sapiens]	0	FALSE	255.075	54	26	140	26	1	421	48	7.68	476.94	26	0	15162.8	13532.5	12049.9	11932.7	13920.1	13431.5		15162.8	14578	11646.8	11653.3	15791.5	15789.3	14870.4	11650	0.783435	15790.4	1.06187	0.0677988	0.723197	FALSE
FALSE	High	Master Protein	O00151	PDZ and LIM domain protein 1 [OS=Homo sapiens]	0	FALSE	254.903	81	20	119	20	1	329	36	7.02	455.56	20	0	13386.4	12511.2	14365	13787.6	12067.6	11442.8		13386.4	13477.8	13884.4	13464.7	13690	13451.5	13432.1	13674.6	1.01805	13570.7	1.01032	0.913748	0.975284	TRUE
FALSE	High	Master Protein	Q13617-2	Isoform 2 of Cullin-2 [OS=Homo sapiens]	0	FALSE	254.76	45	33	111	32	1	764	89.4	7.11	355.04	33	0	12315.5	11280.4	13268.3	13191.6	10346.4	9968.2		12315.5	12151.9	12824.4	12882.7	11737.4	11718	12233.7	12853.5	1.05066	11727.7	0.958638	0.768937	0.733521	FALSE
FALSE	High	Master Protein	O14617-5	Isoform 5 of AP-3 complex subunit delta-1 [OS=Homo sapiens]	0	FALSE	254.53	27	31	101	31	1	1215	136.6	7.64	347.51	31	0	12603.4	11949.7	12289.4	12023.2	11698.8	11008.9		12603.4	12872.9	11878.2	11741.6	13271.6	12941.4	12738.2	11809.9	0.92713	13106.5	1.02892	0.473852	0.882674	FALSE
FALSE	High	Master Protein	Q8IWX8	Calcium homeostasis endoplasmic reticulum protein [OS=Homo sapiens]	0	FALSE	254.342	30	23	117	23	1	916	103.6	9.04	419.74	23	0	14712.1	13243.6	10380.8	10414	12776.6	12533.7		14712.1	14266.8	10033.5	10170.1	14494.3	14733.9	14489.5	10101.8	0.697183	14614.1	1.0086	0.011728	0.983877	FALSE
FALSE	High	Master Protein	Q16401	26S proteasome non-ATPase regulatory subunit 5 [OS=Homo sapiens]	0	FALSE	254.245	56	22	174	22	1	504	56.2	5.48	659.39	22	0	15571.8	15090.4	16200.9	15742.3	16379.4	15858.2		15571.8	16256.3	15658.9	15373.6	18581.4	18642	15914.1	15516.3	0.975004	18611.7	1.16951	0.810996	0.303408	FALSE
FALSE	High	Master Protein	Q96ST3	Paired amphipathic helix protein Sin3a [OS=Homo sapiens]	0	FALSE	253.946	33	35	90	34	1	1273	145.1	7.25	328.7	35	1	11537.7	10558.5	13192.3	12874.6	8240.3	7934.3		11537.7	11374.3	12750.9	12573.1	9348.12	9327.11	11456	12662	1.10528	9337.62	0.815086	0.545651	0.182864	FALSE
FALSE	High	Master Protein	P40926	Malate dehydrogenase, mitochondrial [OS=Homo sapiens]	0	FALSE	253.614	68	21	655	21	1	338	35.5	8.68	2327.89	21	0	58348.9	58100	68453.6	69085.5	54711.3	55957.1		58348.9	62588.9	66163.4	67467.6	62066.7	65780	60468.9	66815.5	1.10496	63923.3	1.05713	0.437095	0.84876	TRUE
FALSE	High	Master Protein	Q9P265	Disco-interacting protein 2 homolog B [OS=Homo sapiens]	0	FALSE	253.447	34	40	105	37	1	1576	171.4	8.09	366.14	40	3	10409.5	9633.2	10397.7	9980.2	9513.7	9143.7		10409.5	10377.5	10049.8	9746.48	10792.7	10748.8	10393.5	9898.15	0.952342	10770.8	1.0363	0.64014	0.783678	FALSE
FALSE	High	Master Protein	Q9UBC2-2	Isoform 2 of Epidermal growth factor receptor substrate 15-like 1 [OS=Homo sapiens]	0	FALSE	253.244	35	32	85	7	1	910	99.5	5.08	338.57	32	24	9712.1	9105	10577.6	10398	8893	8507.7		9712.1	9808.46	10223.7	10154.5	10088.6	10001.2	9760.28	10189.1	1.04394	10044.9	1.02916	0.842642	0.811202	TRUE
FALSE	High	Master Protein	Q15437	protein transport protein Sec23B [OS=Homo sapiens]	0	FALSE	252.918	43	27	107	24	1	767	86.4	6.89	418.1	27	3	10586	9832	12540	12494.4	11467.9	11050.6		10586	10591.6	12120.5	12201.8	13009.6	12990.5	10588.8	12161.1	1.14849	13000	1.22771	0.395324	0.163295	TRUE
FALSE	High	Master Protein	P18583-6	Isoform E of Protein SON [OS=Homo sapiens]	0	FALSE	252.295	23	35	164	1	1	2108	228	5.4	571.33	35	0	66.1	56.8	76.5	62	63.5	61.4		66.1	61.1884	73.9406	60.5481	72.0369	72.1783	63.6442	67.2443	1.05657	72.1076	1.13298	0.898773	0.447822	TRUE
FALSE	High	Master Protein	P17174	Aspartate aminotransferase, cytoplasmic [OS=Homo sapiens]	0	FALSE	252.251	61	24	207	24	1	413	46.2	7.01	751.12	24	0	21078	19477.9	22584.2	22460.3	28298.3	26761.3		21078	20982.8	21828.6	21934.3	32102.7	31459.1	21030.4	21881.5	1.04047	31780.9	1.51119	0.747206	0.00196136	TRUE
FALSE	High	Master Protein	Q8WYP5-2	Isoform 2 of Protein ELYS [OS=Homo sapiens]	0	FALSE	252.155	21	41	93	40	1	2301	255.8	6.58	338.16	41	0	11400	10430	11906	11558.4	10420	10021.1		11400	11235.8	11507.7	11287.7	11820.9	11780.2	11317.9	11397.7	1.00705	11800.5	1.04264	0.978144	0.815255	TRUE
FALSE	High	Master Protein	P08865	40S ribosomal protein SA [OS=Homo sapiens]	0	FALSE	252.09	56	15	223	15	1	295	32.8	4.87	845.76	15	0	20566.9	19532.6	21706.5	21414.2	19499.4	18755.4		20566.9	21041.7	20980.3	20912.7	22120.9	22047.8	20804.3	20946.5	1.00683	22084.3	1.06153	0.932155	0.826765	TRUE
FALSE	High	Master Protein	Q14139-2	Isoform 2 of Ubiquitin conjugation factor E4 A [OS=Homo sapiens]	0	FALSE	251.64	32	30	139	30	1	1073	123.4	5.24	467.54	30	0	13470.1	12732.6	16793.2	16472.4	15630	14896		13470.1	13716.3	16231.4	16086.6	17731.3	17510.9	13593.2	16159	1.18875	17621.1	1.29631	0.280605	0.0681213	TRUE
FALSE	High	Master Protein	P16930	Fumarylacetoacetase [OS=Homo sapiens]	0	FALSE	251.121	49	15	187	3	1	419	46.3	6.95	557.01	15	18	16073.1	14615.6	18916.2	18951.6	13917.5	13143.4		16073.1	15744.8	18283.3	18507.8	15788.6	15450.6	15909	18395.6	1.1563	15619.6	0.981811	0.371091	0.863707	FALSE
FALSE	High	Master Protein	Q6ZNJ1-1	Neurobeachin-like protein 2 [OS=Homo sapiens]	0	FALSE	250.834	20	36	110	36	1	2754	302.3	6.38	386.14	36	0	8816	8200.4	7791.3	7722.7	10184.9	9609		8816	8833.97	7530.63	7541.85	11554.2	11295.8	8824.99	7536.24	0.853966	11425	1.29462	0.225518	0.0697462	FALSE
FALSE	High	Master Protein	Q9BY44-1	Eukaryotic translation initiation factor 2A [OS=Homo sapiens]	0	FALSE	250.834	50	27	172	27	1	585	64.9	8.87	616.38	27	0	20531.4	18696.8	19311.5	19071.1	20010.9	18902.5		20531.4	20141.3	18665.4	18624.5	22701.2	22220.7	20336.4	18644.9	0.916828	22460.9	1.10447	0.41285	0.621567	FALSE
FALSE	High	Master Protein	O15226-2	Isoform 2 of NF-kappa-B-repressing factor [OS=Homo sapiens]	0	FALSE	250.75	47	33	99	33	1	705	79.4	8.88	343.76	33	0	13070.8	11638	11263.3	11271.2	9823.4	9583.6		13070.8	12537.2	10886.5	11007.2	11144.1	11265.9	12804	10946.9	0.854957	11205	0.875118	0.210952	0.394805	TRUE
FALSE	High	Master Protein	O14744	Protein arginine N-methyltransferase 5 [OS=Homo sapiens]	0	FALSE	249.576	56	31	146	2	1	637	72.6	6.29	512.95	31	33	18786.5	17622.9	20553.1	20299.6	16750	15984.9		18786.5	18984.5	19865.5	19824.2	19001.9	18790.9	18885.5	19844.8	1.0508	18896.4	1.00058	0.692713	0.972107	TRUE
FALSE	High	Master Protein	O00116	Alkyldihydroxyacetonephosphate synthase, peroxisomal [OS=Homo sapiens]	0	FALSE	249.484	43	23	87	23	1	658	72.9	7.34	360.14	23	0	11754.3	11304	10511.9	10444.7	15612.7	15335.3		11754.3	12177.4	10160.2	10200.1	17711.7	18027.3	11965.8	10180.2	0.850769	17869.5	1.49338	0.198915	0.00221484	FALSE
FALSE	High	Master Protein	Q8IYD1	eukaryotic peptide chain release factor GTP-binding subunit ERF3B [OS=Homo sapiens]	0	FALSE	249.459	37	24	202	5	1	628	68.8	5.43	599.29	24	0	1469.3	1392.9	1501.7	1449.4	1200.3	1163.9		1469.3	1500.52	1451.46	1415.46	1361.67	1368.21	1484.91	1433.46	0.965351	1364.94	0.919209	0.792605	0.8391	TRUE
FALSE	High	Master Protein	P22570-7	Isoform 7 of NADPH:adrenodoxin oxidoreductase, mitochondrial [OS=Homo sapiens]	0	FALSE	249.29	68	30	108	30	1	522	57.3	9.2	406.4	30	0	12355	11441.4	16487.4	16647.6	7857.9	7882.6		12355	12325.4	15935.8	16257.7	8914.31	9266.33	12340.2	16096.8	1.30442	9090.32	0.736644	0.0824511	0.0499284	FALSE
FALSE	High	Master Protein	Q5H9R7-5	Isoform 5 of Serine/threonine-protein phosphatase 6 regulatory subunit 3 [OS=Homo sapiens]	0	FALSE	249.189	40	32	130	31	1	879	98.4	4.64	496.13	32	2	11221.4	10684.7	13408.8	13043.8	11406.3	11022		11221.4	11510.2	12960.2	12738.3	12939.8	12956.8	11365.8	12849.3	1.13052	12948.3	1.13923	0.454563	0.401312	TRUE
FALSE	High	Master Protein	Q9ULH0-1	Kinase D-interacting substrate of 220 kDa [OS=Homo sapiens]	0	FALSE	249.167	22	37	90	37	1	1771	196.4	6.62	315.16	37	0	8750	8534.3	9325	9323.7	8865.4	8843.7		8750	9193.67	9013.02	9105.35	10057.3	10396.1	8971.84	9059.19	1.00974	10226.7	1.13987	0.995391	0.428617	TRUE
FALSE	High	Master Protein	P34913-1	Bifunctional epoxide hydrolase 2 [OS=Homo sapiens]	0	FALSE	249.153	56	23	88	23	1	555	62.6	6.28	360.96	23	0	12157.8	11772.9	15545.5	15225.1	6485.9	6428.2		12157.8	12682.5	15025.4	14868.6	7357.86	7556.62	12420.1	14947	1.20345	7457.24	0.600415	0.245032	0.009462	FALSE
FALSE	High	Master Protein	P18858	DNA ligase 1 [OS=Homo sapiens]	0	FALSE	249.063	47	35	103	35	1	919	101.7	5.62	367.38	35	0	14717.3	13566.7	13771.3	13633.3	7633.1	7462.5		14717.3	14614.9	13310.6	13314	8659.29	8772.49	14666.1	13312.3	0.907692	8715.89	0.594289	0.362861	0.0019266	TRUE
FALSE	High	Master Protein	O94915-1	protein furry homolog-like [OS=Homo sapiens]	0	FALSE	248.971	18	50	122	50	1	3013	339.4	5.58	393.02	50	0	11983.7	11096.9	10109.8	9897.8	10331.3	9651.1		11983.7	11954.3	9771.56	9666.01	11720.2	11345.3	11969	9718.79	0.811998	11532.8	0.963554	0.110365	0.760642	TRUE
FALSE	High	Master Protein	Q14694-2	Isoform 2 of Ubiquitin carboxyl-terminal hydrolase 10 [OS=Homo sapiens]	0	FALSE	248.874	40	27	118	27	1	846	92.5	5.69	445.08	27	0	11399.3	10432.7	11994.2	11980.1	11156.3	10812.8		11399.3	11238.7	11592.9	11699.5	12656.1	12710.9	11319	11646.2	1.02891	12683.5	1.12055	0.912873	0.47021	TRUE
FALSE	High	Master Protein	P62333	26S protease regulatory subunit 10B [OS=Homo sapiens]	0	FALSE	248.771	60	21	178	21	1	389	44.1	7.49	519.45	21	0	15286.1	14235.6	15923.1	15927.1	13363.4	13083.8		15286.1	15335.5	15390.4	15554.1	15160	15380.6	15310.8	15472.2	1.01055	15270.3	0.997354	0.94766	0.953392	FALSE
FALSE	High	Master Protein	Q13409-2	Isoform 2B of Cytoplasmic dynein 1 intermediate chain 2 [OS=Homo sapiens]	0	FALSE	248.402	47	21	80	21	1	632	70.6	5.24	349.09	21	0	9715.1	8895.8	10117.1	9889.1	8357.6	7922.4		9715.1	9583.1	9778.62	9657.51	9481.19	9313.12	9649.1	9718.07	1.00715	9397.16	0.973889	0.978777	0.952598	FALSE
FALSE	High	Master Protein	P51858	hepatoma-derived growth factor [OS=Homo sapiens]	0	FALSE	248.396	78	23	158	21	1	240	26.8	4.73	558.86	23	3	21321.8	19409.4	23079.1	22523.3	17580.8	16797.2		21321.8	20909	22307	21995.8	19944.4	19745.8	21115.4	22151.4	1.04906	19845.1	0.93984	0.701764	0.3723	FALSE
FALSE	High	Master Protein	P02100	Hemoglobin subunit epsilon [OS=Homo sapiens]	0	FALSE	248.266	94	18	983	15	1	147	16.2	8.63	2953.48	18	3	112973	113807	176373	175362	110244	108253		112973	122600	170472	171255	125065	127256	117787	170864	1.45062	126160	1.07109	0.00130542	0.779434	TRUE
FALSE	High	Master Protein	Q9NQW6	Anillin [OS=Homo sapiens]	0	FALSE	247.249	37	37	109	37	1	1124	124.1	8.07	365.76	37	0	15312.8	13728.1	14095.6	14144	11777.5	11304.8		15312.8	14788.8	13624	13812.8	13360.9	13289.3	15050.8	13718.4	0.911474	13325.1	0.885341	0.383078	0.381945	TRUE
FALSE	High	Master Protein	Q9Y450-1	HBS1-like protein [OS=Homo sapiens]	0	FALSE	247.203	43	26	123	24	1	684	75.4	6.61	454.16	26	1	18473.5	16910.8	20667.8	20353.5	14038.7	13158		18473.5	18217.3	19976.3	19876.9	15926.1	15467.8	18345.4	19926.6	1.08619	15696.9	0.855632	0.519088	0.275399	FALSE
FALSE	High	Master Protein	Q9NVI7-2	Isoform 2 of ATPase family AAA domain-containing protein 3A [OS=Homo sapiens]	0	FALSE	246.869	53	32	153	10	1	586	66.2	9.25	570.14	32	24	15791.2	15546.3	16447.4	16815.8	15308	15333		15791.2	16747.4	15897.1	16422	17366	18024.6	16269.3	16159.6	0.993254	17695.3	1.08765	0.954333	0.605963	FALSE
FALSE	High	Master Protein	P24752	Acetyl-CoA acetyltransferase, mitochondrial [OS=Homo sapiens]	0	FALSE	246.845	67	27	142	27	1	427	45.2	8.85	535.61	27	0	18093.7	16527.2	19728.6	20307.4	12067.6	12112.8		18093.7	17804.1	19068.5	19831.8	13690	14239.1	17948.9	19450.2	1.08364	13964.5	0.778016	0.630317	0.0977135	FALSE
FALSE	High	Master Protein	Q9UHD1	cysteine and histidine-rich domain-containing protein 1 [OS=Homo sapiens]	0	FALSE	246.69	60	17	190	17	1	332	37.5	7.87	674.99	17	0	20120.4	18461.7	18127	17852.6	19854.5	19093.2		20120.4	19888.1	17520.5	17434.5	22523.7	22444.9	20004.2	17477.5	0.873691	22484.3	1.12398	0.211753	0.536285	FALSE
FALSE	High	Master Protein	Q9UHD8-1	Septin-9 [OS=Homo sapiens]	0	FALSE	246.593	61	30	79	30	1	586	65.4	8.97	332.23	30	0	11168.8	10129.9	10776.1	10601.8	8806.4	8445.6		11168.8	10912.5	10415.6	10353.5	9990.33	9928.16	11040.7	10384.5	0.940572	9959.25	0.902051	0.573983	0.525354	TRUE
FALSE	High	Master Protein	O60566-3	Isoform 3 of Mitotic checkpoint serine/threonine-protein kinase BUB1 beta [OS=Homo sapiens]	0	FALSE	246.463	35	28	76	28	1	1064	121.3	5.36	334.16	28	0	9572	8893.7	11745.5	11625.4	7757.3	7447.9		9572	9580.84	11352.5	11353.2	8800.19	8755.33	9576.42	11352.8	1.1855	8777.76	0.916601	0.299329	0.604099	FALSE
FALSE	High	Master Protein	O43264	Centromere/kinetochore protein zw10 homolog [OS=Homo sapiens]	0	FALSE	246.425	43	31	81	31	1	779	88.8	6.27	324.18	31	0	10375.5	9693.6	10671	10590.8	8820.7	8400.3		10375.5	10442.5	10314	10342.8	10006.6	9874.91	10409	10328.4	0.992253	9940.73	0.955011	0.883587	0.833105	TRUE
FALSE	High	Master Protein	Q9UMR2-1	ATP-dependent RNA helicase DDX19B [OS=Homo sapiens]	0	FALSE	246.32	56	24	150	2	1	479	53.9	6.3	494.88	24	0	716.2	636.7	801.3	796.9	604.4	582		716.2	685.892	774.491	778.238	685.655	684.166	701.046	776.365	1.10744	684.911	0.976984	0.676138	0.996925	FALSE
FALSE	High	Master Protein	Q13547	histone deacetylase 1 [OS=Homo sapiens]	0	FALSE	246.132	48	19	124	12	1	482	55.1	5.48	431.29	19	0	6509.7	5847.5	6921.9	6924.6	4895.3	4846.9		6509.7	6299.29	6690.32	6762.44	5553.42	5697.74	6404.49	6726.38	1.05026	5625.58	0.87838	0.859502	0.492931	FALSE
FALSE	High	Master Protein	Q13838-2	Isoform 2 of Spliceosome RNA helicase DDX39B [OS=Homo sapiens]	0	FALSE	246.109	50	24	200	13	1	443	50.6	5.88	633.78	24	0	9669.1	8809.7	10263.4	10332.1	7994.4	7912.2		9669.1	9490.35	9920.02	10090.1	9069.16	9301.13	9579.72	10005.1	1.0444	9185.15	0.958811	0.840479	0.856939	FALSE
FALSE	High	Master Protein	O75367-1	Core histone macro-H2A.1 [OS=Homo sapiens]	0	FALSE	245.975	59	22	179	20	1	372	39.6	9.79	679.12	22	2	24421.2	22580.6	25382.3	24715.5	20839.7	20664		24421.2	24325.2	24533.1	24136.7	23641.4	24291.4	24373.2	24334.9	0.998428	23966.4	0.983309	0.979376	0.65353	TRUE
FALSE	High	Master Protein	Q5VZL5	Zinc finger MYM-type protein 4 [OS=Homo sapiens]	0	FALSE	245.958	29	36	97	35	1	1548	172.7	6.84	333.57	36	0	13545.9	12540.2	14473.2	14090.2	11946.2	11601.2		13545.9	13509.1	13989	13760.2	13552.2	13637.7	13527.5	13874.6	1.02566	13595	1.00499	0.879511	0.997737	TRUE
FALSE	High	Master Protein	O95613	Pericentrin [OS=Homo sapiens]	0	FALSE	245.939	17	48	80	47	1	3336	377.8	5.55	256.64	48	0	8188.2	7636.3	8535.7	8396	7995.2	7642.4		8188.2	8226.29	8250.13	8199.38	9070.07	8983.97	8207.25	8224.75	1.00213	9027.02	1.09988	0.925232	0.55388	TRUE
FALSE	High	Master Protein	P46777	60S ribosomal protein L5 [OS=Homo sapiens]	0	FALSE	245.725	69	25	284	25	1	297	34.3	9.72	915	25	0	36769.1	33837.1	35123.3	34945.7	31029	29877.2		36769.1	36451.4	33948.2	34127.3	35200.5	35121.9	36610.2	34037.8	0.929733	35161.2	0.96042	0.507995	0.495055	TRUE
FALSE	High	Master Protein	O15357	Phosphatidylinositol 3,4,5-trisphosphate 5-phosphatase 2 [OS=Homo sapiens]	0	FALSE	245.672	36	36	141	35	1	1258	138.5	6.54	468.04	36	1	13968.2	12998.2	18312.1	17789.7	12443.2	11756.1		13968.2	14002.5	17699.4	17373.1	14116.1	13819.8	13985.3	17536.3	1.2539	13967.9	0.998756	0.147222	0.961527	FALSE
FALSE	High	Master Protein	Q15813	Tubulin-specific chaperone E [OS=Homo sapiens]	0	FALSE	245.374	62	27	102	27	1	527	59.3	6.76	344.07	27	0	18579.3	17156.2	20198.7	19907.2	19568	18505		18579.3	18481.7	19522.9	19441	22198.7	21753.4	18530.5	19482	1.05135	21976.1	1.18594	0.765979	0.310148	TRUE
FALSE	High	Master Protein	P21796	voltage-dependent anion-selective channel protein 1 [OS=Homo sapiens]	0	FALSE	245.317	77	19	256	17	1	283	30.8	8.54	943.94	19	2	23787.2	24116.7	29062.6	29624.5	27299.5	28150.7		23787.2	25980	28090.3	28930.7	30969.6	33092.4	24883.6	28510.5	1.14576	32031	1.28723	0.286955	0.0963043	TRUE
FALSE	High	Master Protein	Q9Y570-4	Isoform 4 of Protein phosphatase methylesterase 1 [OS=Homo sapiens]	0	FALSE	245.27	55	23	119	23	1	400	43.8	5.85	447.96	23	0	18293.9	16684.6	17877.2	17571.1	23088.4	21646.6		18293.9	17973.7	17279.1	17159.6	26192.4	25446.5	18133.8	17219.4	0.949573	25819.4	1.42383	0.622318	0.0111786	FALSE
FALSE	High	Master Protein	Q9Y6A5	Transforming acidic coiled-coil-containing protein 3 [OS=Homo sapiens]	0	FALSE	245.267	47	34	113	34	1	838	90.3	5.05	373.29	34	0	14592.6	13249	15257.2	14894.1	10340.4	10080.5		14592.6	14272.6	14746.7	14545.3	11730.6	11850.1	14432.6	14646	1.01479	11790.3	0.816921	0.928478	0.169855	FALSE
FALSE	High	Master Protein	P38919	Eukaryotic initiation factor 4A-III [OS=Homo sapiens]	0	FALSE	244.849	62	26	213	22	1	411	46.8	6.73	743.35	26	0	15497.5	14788.8	15452.2	15369.1	12944.2	13040.8		15497.5	15931.4	14935.2	15009.2	14684.4	15330	15714.5	14972.2	0.952766	15007.2	0.954995	0.644983	0.713633	TRUE
FALSE	High	Master Protein	P62917	60S ribosomal protein L8 [OS=Homo sapiens]	0	FALSE	244.728	64	16	281	16	1	257	28	11.03	882.29	16	0	30017.8	25954.5	27137.7	28050.6	24928.6	23866.5		30017.8	27959.8	26229.8	27393.7	28280	28056.1	28988.8	26811.7	0.9249	28168	0.971687	0.476985	0.570452	TRUE
FALSE	High	Master Protein	Q9H2G2-2	Isoform 2 of STE20-like serine/threonine-protein kinase [OS=Homo sapiens]	0	FALSE	244.448	32	32	81	31	1	1204	138.9	5.1	322.55	32	1	12290	11050.1	13038.6	12961.5	10214.4	9581.7		12290	11903.8	12602.4	12658	11587.6	11263.7	12096.9	12630.2	1.04408	11425.7	0.94451	0.797694	0.657512	FALSE
FALSE	High	Master Protein	P26368	Splicing factor U2AF 65 kDa subunit [OS=Homo sapiens]	0	FALSE	244.403	49	16	154	16	1	475	53.5	9.09	583.74	16	0	10398.2	9950.2	10694.4	10426	9528.5	9391.8		10398.2	10719	10336.6	10181.8	10809.5	11040.5	10558.6	10259.2	0.971648	10925	1.0347	0.754894	0.789813	FALSE
FALSE	High	Master Protein	Q96HC4	PDZ and LIM domain protein 5 [OS=Homo sapiens]	0	FALSE	243.988	41	23	143	23	1	596	63.9	8.21	486.25	23	0	12561	11358.6	12118.7	11887.1	12136.1	11425		12561	12236.2	11713.3	11608.7	13767.7	13430.6	12398.6	11661	0.940509	13599.1	1.09683	0.57364	0.566374	FALSE
FALSE	High	Master Protein	P28482	mitogen-activated protein kinase 1 [OS=Homo sapiens]	0	FALSE	243.467	67	22	210	17	1	360	41.4	6.98	722.06	22	7	24011.1	21978	28150	28114.7	19958.5	18850.4		24011.1	23676	27208.2	27456.3	22641.7	22159.5	23843.6	27332.2	1.14632	22400.6	0.939481	0.285171	0.370341	FALSE
FALSE	High	Master Protein	P43490	nicotinamide phosphoribosyltransferase [OS=Homo sapiens]	0	FALSE	243.382	58	23	128	23	1	491	55.5	7.15	480.3	23	0	17968.8	16980	18660.1	18253.9	17688.8	16964.5		17968.8	18291.9	18035.8	17826.4	20066.9	19942.5	18130.3	17931.1	0.989011	20004.7	1.10338	0.920699	0.626501	FALSE
FALSE	High	Master Protein	Q9BZZ5-2	Isoform 2 of Apoptosis inhibitor 5 [OS=Homo sapiens]	0	FALSE	243.14	54	28	143	28	1	504	56.7	5.92	511.39	28	0	23582	21400.8	25003.8	24784	14797.7	14247.3		23582	23054.3	24167.3	24203.6	16787.1	16748.3	23318.1	24185.4	1.03719	16767.7	0.719084	0.76476	0.0370437	FALSE
FALSE	High	Master Protein	Q96PK6-1	RNA-binding protein 14 [OS=Homo sapiens]	0	FALSE	242.842	49	32	176	32	1	669	69.4	9.67	626.39	32	0	16458.6	14407.5	12541.6	12478.3	12422.7	12118.5		16458.6	15520.6	12122	12186.1	14092.8	14245.8	15989.6	12154	0.760121	14169.3	0.886157	0.0172874	0.385188	TRUE
FALSE	High	Master Protein	P62701	40S ribosomal protein S4, X isoform [OS=Homo sapiens]	0	FALSE	242.793	70	26	282	26	1	263	29.6	10.15	831.16	26	0	34873.9	33092.9	34838.4	34458.3	30347.4	29181		34873.9	35649.7	33672.8	33651.3	34427.3	34303.5	35261.8	33662.1	0.954633	34365.4	0.974579	0.682911	0.590647	TRUE
FALSE	High	Master Protein	O95602	DNA-directed RNA polymerase I subunit RPA1 [OS=Homo sapiens]	0	FALSE	242.722	29	40	101	40	1	1720	194.7	7.03	330.75	40	0	13428.8	12612.4	11304.6	11022	8783.7	8666.2		13428.8	13586.9	10926.4	10763.9	9964.58	10187.5	13507.8	10845.1	0.802878	10076	0.74594	0.0949345	0.0592842	TRUE
FALSE	High	Master Protein	Q15067-2	Isoform 2 of Peroxisomal acyl-coenzyme A oxidase 1 [OS=Homo sapiens]	0	FALSE	242.641	52	24	93	24	1	660	74.6	7.62	356.07	24	0	8084.4	7540.6	10324.3	10266.7	10382.8	10133.5		8084.4	8123.2	9978.88	10026.3	11778.7	11912.4	8103.8	10002.6	1.23431	11845.5	1.46172	0.184423	0.0042186	TRUE
FALSE	High	Master Protein	Q9H4A4	aminopeptidase B [OS=Homo sapiens]	0	FALSE	242.639	50	31	122	31	1	650	72.5	5.74	428.56	31	0	14148.4	12832.6	13606.9	13494.7	9174.8	8762.1		14148.4	13824.1	13151.7	13178.7	10408.3	10300.2	13986.2	13165.2	0.941295	10354.2	0.740317	0.565249	0.0534651	TRUE
FALSE	High	Master Protein	P30520	adenylosuccinate synthetase isozyme 2 [OS=Homo sapiens]	0	FALSE	242.514	57	26	101	23	1	456	50.1	6.55	372.15	26	3	11701.4	10682.3	10910.5	10913.5	14155.1	13679		11701.4	11507.6	10545.5	10657.9	16058.1	16080.3	11604.5	10601.7	0.913584	16069.2	1.38474	0.435799	0.0173781	FALSE
FALSE	High	Master Protein	Q9NYF8-1	Bcl-2-associated transcription factor 1 [OS=Homo sapiens]	0	FALSE	242.242	31	32	104	3	1	920	106.1	9.98	371.07	32	28	16744.2	15182.1	16930.9	16571.7	16341.3	15676.6		16744.2	16355.1	16364.5	16183.6	18538.2	18428.5	16549.6	16274	0.983346	18483.4	1.11684	0.876033	0.484615	FALSE
FALSE	High	Master Protein	P10515	Dihydrolipoyllysine-residue acetyltransferase component of pyruvate dehydrogenase complex, mitochondrial [OS=Homo sapiens]	0	FALSE	242.102	38	21	130	21	1	647	69	7.84	448.56	21	0	11450.9	10695.4	12590.3	12671	9168.2	9077.3		11450.9	11521.7	12169.1	12374.3	10400.8	10670.8	11486.3	12271.7	1.06837	10535.8	0.917244	0.693244	0.607698	FALSE
FALSE	High	Master Protein	Q96JH7	Deubiquitinating protein VCIP135 [OS=Homo sapiens]	0	FALSE	241.554	35	40	107	40	1	1222	134.2	7.2	315.68	40	0	7766.3	7117.5	8599.1	8512.9	9192.1	8779.1		7766.3	7667.41	8311.4	8313.54	10427.9	10320.2	7716.85	8312.47	1.07718	10374	1.34434	0.692361	0.0699391	TRUE
FALSE	High	Master Protein	O14686-3	Isoform 3 of Histone-lysine N-methyltransferase 2D [OS=Homo sapiens]	0	FALSE	241.272	11	42	90	41	1	5540	593.3	5.58	304.15	42	0	7940.3	7399.5	7041	6979.4	8575.8	8255.2		7940.3	7971.19	6805.43	6815.95	9728.73	9704.34	7955.75	6810.69	0.856072	9716.53	1.22132	0.231661	0.23084	FALSE
FALSE	High	Master Protein	P63104-1	14-3-3 protein zeta/delta [OS=Homo sapiens]	0	FALSE	241.07	69	19	364	13	1	245	27.7	4.79	1403.96	19	0	26801.3	25746.8	32457.2	31554.5	24533.5	23679.1		26801.3	27736	31371.3	30815.5	27831.8	27835.8	27268.7	31093.4	1.14026	27833.8	1.02072	0.304851	0.946342	TRUE
FALSE	High	Master Protein	Q9Y266	nuclear migration protein nudC [OS=Homo sapiens]	0	FALSE	240.686	54	26	156	25	1	331	38.2	5.38	548.46	26	1	24404.3	22445	22631.6	22949.9	21611.7	20683.9		24404.3	24179.1	21874.4	22412.5	24517.2	24314.8	24291.7	22143.4	0.911563	24416	1.00512	0.39704	0.820831	FALSE
FALSE	High	Master Protein	P00390	Glutathione reductase, mitochondrial [OS=Homo sapiens]	0	FALSE	240.648	47	18	135	18	1	522	56.2	8.5	495.92	18	0	12597.3	11632.7	14064.5	13739.3	8096	7669.8		12597.3	12531.5	13594	13417.5	9184.42	9016.18	12564.4	13505.7	1.07492	9100.3	0.724294	0.665954	0.0394423	FALSE
FALSE	High	Master Protein	Q7Z2T5-1	TRMT1-like protein [OS=Homo sapiens]	0	FALSE	240.236	49	29	105	29	1	733	81.7	7.88	327.98	29	0	11981.4	10791.1	12002.3	11707.6	8724.4	8544		11981.4	11624.8	11600.7	11433.4	9897.3	10043.8	11803.1	11517.1	0.975766	9970.57	0.84474	0.780201	0.273797	TRUE
FALSE	High	Master Protein	O94979-7	Isoform 7 of Protein transport protein Sec31A [OS=Homo sapiens]	0	FALSE	240.011	33	27	165	1	1	969	105.7	8.44	528.67	27	0	324.4	308.3	398.7	358.4	396.9	377.5		324.4	332.12	385.361	350.007	450.259	443.767	328.26	367.684	1.1201	447.013	1.36177	0.612618	0.0770015	TRUE
FALSE	High	Master Protein	Q5T9A4	ATPase family AAA domain-containing protein 3B [OS=Homo sapiens]	0	FALSE	239.976	49	31	146	9	1	648	72.5	9.2	525.32	31	0	2579	2486.9	2403.6	2467.2	2804.1	2747.2		2579	2679.04	2323.18	2409.42	3181.08	3229.45	2629.02	2366.3	0.90007	3205.27	1.21919	0.469691	0.261262	FALSE
FALSE	High	Master Protein	Q9UIG0	Tyrosine-protein kinase BAZ1B [OS=Homo sapiens]	0	FALSE	239.952	28	35	89	35	1	1483	170.8	8.48	296.72	35	0	10400.4	9635.1	10730.4	10738.6	7587	7320.2		10400.4	10379.5	10371.4	10487.1	8606.99	8605.21	10390	10429.3	1.00378	8606.1	0.828309	0.957196	0.220188	FALSE
FALSE	High	Master Protein	O14981	TATA-binding protein-associated factor 172 [OS=Homo sapiens]	0	FALSE	239.86	22	35	84	35	1	1849	206.8	6.52	298.58	35	0	8495	7515.2	7421.4	7157.4	7841	7234.6		8495	8095.83	7173.11	6989.79	8895.14	8504.58	8295.42	7081.45	0.853658	8699.86	1.04876	0.224629	0.736335	FALSE
FALSE	High	Master Protein	Q6NZY4	Zinc finger CCHC domain-containing protein 8 [OS=Homo sapiens]	0	FALSE	239.684	53	27	95	27	1	707	78.5	4.87	348.31	27	0	10672.1	10054.2	11762	11619.9	9742.9	9476.4		10672.1	10831	11368.5	11347.8	11052.7	11139.9	10751.6	11358.1	1.05642	11096.3	1.03207	0.785216	0.799958	TRUE
FALSE	High	Master Protein	P05388	60S acidic ribosomal protein P0 [OS=Homo sapiens]	0	FALSE	239.571	62	20	264	20	1	317	34.3	5.97	885.23	20	0	48671.2	44587.7	45939.6	45274.3	44622.3	42268.2		48671.2	48032.6	44402.6	44214.1	50621.3	49688.1	48351.9	44308.3	0.916372	50154.7	1.03728	0.424888	0.949179	FALSE
FALSE	High	Master Protein	Q9Y285	Phenylalanine--tRNA ligase alpha subunit [OS=Homo sapiens]	0	FALSE	239.273	56	23	110	23	1	508	57.5	7.8	427.78	23	0	13885.2	12705.3	13925.8	13605.6	11424.5	11076.5		13885.2	13686.9	13459.9	13287	12960.4	13020.9	13786.1	13373.4	0.970069	12990.7	0.942303	0.773106	0.645931	TRUE
FALSE	High	Master Protein	Q9ULU4-5	Isoform 5 of Protein kinase C-binding protein 1 [OS=Homo sapiens]	0	FALSE	239.219	34	34	96	2	1	1181	131	6.9	310.57	34	0	1171.6	964.7	966.5	1053.2	707.5	685.8	Acetyl [N-Term]	1171.6	1039.23	934.164	1028.54	802.616	806.187	1105.42	981.35	0.887765	804.402	0.727691	0.473554	0.226815	TRUE
FALSE	High	Master Protein	Q8WWQ0	PH-interacting protein [OS=Homo sapiens]	0	FALSE	238.996	24	35	107	33	1	1821	206.6	8.85	335.05	35	2	9045.9	8350.4	11223.6	10674.8	8718.4	8668.4		9045.9	8995.56	10848.1	10424.8	9890.5	10190.1	9020.73	10636.5	1.17911	10040.3	1.11302	0.317311	0.510827	TRUE
FALSE	High	Master Protein	Q9UGP8	Translocation protein SEC63 homolog [OS=Homo sapiens]	0	FALSE	238.732	34	26	107	26	1	760	87.9	5.31	399.79	26	0	13731.4	12670.5	14203.3	14260.2	11078.8	10559.8		13731.4	13649.4	13728.1	13926.2	12568.2	12413.5	13690.4	13827.2	1.00999	12490.9	0.91238	0.950178	0.498168	FALSE
FALSE	High	Master Protein	O60287	nucleolar pre-ribosomal-associated protein 1 [OS=Homo sapiens]	0	FALSE	238.284	20	40	99	40	1	2271	254.2	6.47	331.8	40	0	8305.4	7887.4	7275.6	7041.9	7512.2	7398.1		8305.4	8496.79	7032.18	6876.99	8522.14	8696.78	8401.1	6954.59	0.827819	8609.46	1.0248	0.158746	0.828105	FALSE
FALSE	High	Master Protein	Q12789-2	General transcription factor 3C polypeptide 1 [OS=Homo sapiens]	0	FALSE	238.071	21	38	85	38	1	2109	238.7	7.3	281.41	38	0	8436.2	7669.3	8419.3	8203.3	7787.1	7427.6		8436.2	8261.84	8137.62	8011.19	8833.99	8731.46	8349.02	8074.41	0.967108	8782.73	1.05195	0.720224	0.724354	FALSE
FALSE	High	Master Protein	P30154-2	Isoform 2 of Serine/threonine-protein phosphatase 2A 65 kDa regulatory subunit A beta isoform [OS=Homo sapiens]	0	FALSE	237.712	41	24	103	16	1	667	73.5	5.07	369.25	24	1	7289.9	6725.9	9117.4	8947.2	5904.9	5539.2		7289.9	7245.55	8812.36	8737.67	6698.75	6511.57	7267.73	8775.02	1.2074	6605.16	0.908834	0.24293	0.679138	FALSE
FALSE	High	Master Protein	Q14498-1	RNA-binding protein 39 [OS=Homo sapiens]	0	FALSE	237.673	48	22	150	20	1	530	59.3	10.1	532.89	22	3	21840.6	20460.1	19644.8	19624.1	19053.9	18919.6		21840.6	22040.9	18987.6	19164.5	21615.5	22240.8	21940.7	19076	0.869435	21928.1	0.999426	0.196643	0.776027	TRUE
FALSE	High	Master Protein	Q9BTW9	Tubulin-specific chaperone D [OS=Homo sapiens]	0	FALSE	237.566	30	29	94	29	1	1192	132.5	6.19	367.37	29	0	11288.4	10252.6	13596.1	13346.8	8127.5	7734		11288.4	11044.7	13141.2	13034.2	9220.16	9091.65	11166.6	13087.7	1.17205	9155.9	0.819939	0.325137	0.195976	FALSE
FALSE	High	Master Protein	Q99613	Eukaryotic translation initiation factor 3 subunit C [OS=Homo sapiens]	0	FALSE	237.215	34	32	120	32	1	913	105.3	5.68	420.88	32	0	15559.6	14370.5	14735.2	14184.8	17432.1	16474.6		15559.6	15480.8	14242.2	13852.6	19775.7	19366.6	15520.2	14047.4	0.905106	19571.1	1.26101	0.349426	0.108969	FALSE
FALSE	High	Master Protein	P46109	Crk-like protein [OS=Homo sapiens]	0	FALSE	237.177	60	17	203	17	1	303	33.8	6.74	708.12	17	0	24191.4	23181.2	21100.9	20758	19717.3	18827.7		24191.4	24972.2	20394.9	20271.9	22368.1	22132.8	24581.8	20333.4	0.827173	22250.4	0.905158	0.088015	0.212815	TRUE
FALSE	High	Master Protein	Q07157-2	Isoform Short of Tight junction protein ZO-1 [OS=Homo sapiens]	0	FALSE	236.975	27	37	98	1	1	1668	186.9	6.79	350.67	37	0	592.4	559	573.4	538	501.9	469.3		592.4	602.189	554.216	525.401	569.375	551.682	597.295	539.808	0.903756	560.529	0.938446	0.561366	0.840108	TRUE
FALSE	High	Master Protein	Q96T76-8	Isoform 5 of MMS19 nucleotide excision repair protein homolog [OS=Homo sapiens]	0	FALSE	236.839	37	28	86	28	1	1051	115.6	6.52	294.97	28	0	9090	8284.5	9441.2	9518.7	7929.3	7699.2		9090	8924.57	9125.33	9295.79	8995.31	9050.74	9007.29	9210.56	1.02257	9023.03	1.00175	0.942743	0.918725	TRUE
FALSE	High	Master Protein	P53675	Clathrin heavy chain 2 [OS=Homo sapiens]	0	FALSE	236.823	13	25	155	1	1	1640	186.9	5.85	514.64	25	0	64.7	75.1	77	72.4	56.4	54.1		64.7	80.9023	74.4238	70.7045	63.9824	63.5969	72.8012	72.5642	0.996745	63.7896	0.876217	0.912873	0.716775	TRUE
FALSE	High	Master Protein	Q15424-3	Isoform 3 of Scaffold attachment factor B1 [OS=Homo sapiens]	0	FALSE	236.823	33	35	109	21	1	917	102.8	5.49	408.78	35	0	8081.3	7392.5	7828.4	7720.6	6967	6703.6		8081.3	7963.65	7566.49	7539.8	7903.64	7880.37	8022.48	7553.14	0.941498	7892	0.983737	0.581339	0.990325	TRUE
FALSE	High	Master Protein	Q9Y2Z0-2	Isoform 2 of Protein SGT1 homolog [OS=Homo sapiens]	0	FALSE	236.811	69	22	90	1	1	333	37.8	5.21	377.04	22	0	140.5	142.2	116.1	130.7	157.6	150.6		140.5	153.187	112.216	127.639	178.788	177.037	146.843	119.927	0.816704	177.912	1.21158	0.392362	0.225942	FALSE
FALSE	High	Master Protein	Q8IZH2-1	5'-3' exoribonuclease 1 [OS=Homo sapiens]	0	FALSE	236.741	26	35	79	35	1	1706	194	7.21	277.77	35	0	10289.9	9687.4	9779.8	9605.6	5971.5	5669.1		10289.9	10435.9	9452.6	9380.65	6774.31	6664.27	10362.9	9416.63	0.908688	6719.29	0.6484	0.412961	0.0241	TRUE
FALSE	High	Master Protein	O43592	Exportin-T [OS=Homo sapiens]	0	FALSE	236.694	33	27	116	27	1	962	109.9	5.39	410.1	27	0	14571.2	13897	16091.4	15712.8	12145.2	11717.8		14571.2	14970.7	15553	15344.8	13778	13774.8	14770.9	15448.9	1.0459	13776.4	0.932668	0.78972	0.596385	FALSE
FALSE	High	Master Protein	Q9Y613	FH1/FH2 domain-containing protein 1 [OS=Homo sapiens]	0	FALSE	236.602	33	31	86	31	1	1164	126.5	6.39	306.35	31	0	10550.7	9664.2	9744.9	9656.5	7974.7	7589		10550.7	10410.9	9418.87	9430.36	9046.81	8921.19	10480.8	9424.62	0.899228	8984	0.857188	0.370894	0.319925	TRUE
FALSE	High	Master Protein	Q9H4L5	Oxysterol-binding protein-related protein 3 [OS=Homo sapiens]	0	FALSE	236.247	37	28	82	3	1	887	101.2	6.87	330.34	28	25	9089.3	8557.5	8781.9	8660.2	9223.7	9049.9		9089.3	9218.66	8488.09	8457.39	10463.7	10638.5	9153.98	8472.74	0.92558	10551.1	1.15263	0.494731	0.392405	FALSE
FALSE	High	Master Protein	Q8NB90-1	Spermatogenesis-associated protein 5 [OS=Homo sapiens]	0	FALSE	236.138	38	29	142	27	1	893	97.8	5.66	454.22	29	2	15968.1	14291.1	13286.2	13176.6	14082	13327.7		15968.1	15395.2	12841.7	12868	15975.2	15667.3	15681.7	12854.9	0.819738	15821.2	1.0089	0.0740296	0.982388	FALSE
FALSE	High	Master Protein	Q9UG63-2	Isoform 2 of ATP-binding cassette sub-family F member 2 [OS=Homo sapiens]	0	FALSE	235.909	49	32	122	32	1	634	72.4	7.49	410.1	32	0	17321.2	16372.7	15680.8	15432.4	16906.7	16023.8		17321.2	17637.7	15156.2	15071	19179.6	18836.7	17479.4	15113.6	0.864649	19008.1	1.08746	0.180615	0.606801	FALSE
FALSE	High	Master Protein	Q99986	Serine/threonine-protein kinase VRK1 [OS=Homo sapiens]	0	FALSE	235.792	58	20	98	20	1	396	45.4	8.91	381.63	20	0	12001.4	11227.1	13031.9	12012.6	9247.7	8965.8		12001.4	12094.5	12595.9	11731.3	10491	10539.7	12048	12163.6	1.0096	10515.3	0.872788	0.951953	0.384517	FALSE
FALSE	High	Master Protein	P30419	glycylpeptide N-tetradecanoyltransferase 1 [OS=Homo sapiens]	0	FALSE	235.43	48	24	99	17	1	496	56.8	7.8	342.86	24	6	11072	10420.5	12419.4	12703.9	9982.1	9732.5		11072	11225.6	12003.9	12406.4	11324.1	11441	11148.8	12205.1	1.09475	11382.5	1.02096	0.58614	0.843065	TRUE
FALSE	High	Master Protein	Q96KG9	N-terminal kinase-like protein [OS=Homo sapiens]	0	FALSE	235.403	37	26	81	26	1	808	89.6	6.3	344.75	26	0	10637.3	10061.9	12414.7	12215.8	11100.6	10679.2		10637.3	10839.3	11999.3	11929.7	12593	12553.9	10738.3	11964.5	1.11419	12573.4	1.17089	0.51247	0.299362	TRUE
FALSE	High	Master Protein	Q13330-1	Metastasis-associated protein MTA1 [OS=Homo sapiens]	0	FALSE	235.16	45	29	99	24	1	715	80.7	9.26	322.58	29	5	12666	11412.7	10168.9	9922.2	8837.1	8612.4		12666	12294.5	9828.68	9689.84	10025.2	10124.2	12480.2	9759.26	0.781978	10074.7	0.807253	0.066053	0.163088	TRUE
FALSE	High	Master Protein	Q8TAT6-2	Isoform 2 of Nuclear protein localization protein 4 homolog [OS=Homo sapiens]	0	FALSE	235.159	51	27	83	27	1	617	69.4	6.68	342.38	27	0	7941.8	7376.2	8836.1	8686.3	7913.6	7553.8		7941.8	7946.09	8540.47	8482.88	8977.5	8879.82	7943.95	8511.68	1.07147	8928.66	1.12396	0.717535	0.476382	TRUE
FALSE	High	Master Protein	P27816-5	Isoform 5 of Microtubule-associated protein 4 [OS=Homo sapiens]	0	FALSE	235.11	37	25	131	1	1	809	85.2	7.71	450.34	25	0	86.1	86.1	108.8	98	86.1	77.3		86.1	92.7522	105.16	95.705	97.6752	90.8695	89.4261	100.432	1.12308	94.2723	1.05419	0.703615	0.670846	TRUE
FALSE	High	Master Protein	Q9Y6D5	Brefeldin A-inhibited guanine nucleotide-exchange protein 2 [OS=Homo sapiens]	0	FALSE	235.035	27	41	105	21	1	1785	201.9	6.33	320.05	41	0	3691.7	3411.8	4126.2	4018.9	3479.6	3357.4		3691.7	3675.4	3988.15	3924.78	3947.4	3946.77	3683.55	3956.47	1.07409	3947.08	1.07154	0.694329	0.558286	TRUE
FALSE	High	Master Protein	Q04828	aldo-keto reductase family 1 member C1 [OS=Homo sapiens]	0	FALSE	234.852	63	21	171	1	1	323	36.8	7.88	650.9	21	21	19802.9	18152	14492.1	14474.3	18337.7	17408.7		19802.9	19554.4	14007.2	14135.3	20803	20464.7	19678.7	14071.3	0.715053	20633.8	1.04854	0.00465978	0.892024	FALSE
FALSE	High	Master Protein	Q70J99-1	Protein unc-13 homolog D [OS=Homo sapiens]	0	FALSE	234.831	33	32	80	32	1	1090	123.2	6.65	303.2	32	0	9689.6	9177.8	11529.3	11307.7	8370.4	7972.2		9689.6	9886.89	11143.6	11042.9	9495.71	9371.66	9788.24	11093.2	1.13332	9433.69	0.963777	0.466307	0.888283	FALSE
FALSE	High	Master Protein	Q9Y2Z0-1	Protein SGT1 homolog [OS=Homo sapiens]	0	FALSE	234.57	62	22	90	1	1	365	41	5.16	375.64	22	23	8878.5	8425	7716.3	7459.9	8947.7	8686.3		8878.5	9075.93	7458.14	7285.2	10150.6	10211.1	8977.21	7371.67	0.821154	10180.9	1.13408	0.144399	0.445664	FALSE
FALSE	High	Master Protein	O14744-5	Isoform 5 of Protein arginine N-methyltransferase 5 [OS=Homo sapiens]	0	FALSE	234.264	59	30	120	1	1	593	67.6	6.2	432.43	30	0	24.6	24	21.3	25.4	22.5	19.1		24.6	25.8543	20.5874	24.8052	25.5249	22.4529	25.2271	22.6963	0.899677	23.9889	0.950916	0.608947	0.988658	TRUE
FALSE	High	Master Protein	Q8NC51-1	Plasminogen activator inhibitor 1 RNA-binding protein [OS=Homo sapiens]	0	FALSE	233.925	51	29	242	29	1	408	44.9	8.65	791.57	29	0	28420.2	24449.6	24959.3	25291.4	20103.9	18773.5		28420.2	26338.6	24124.2	24699.1	22806.7	22069.1	27379.4	24411.7	0.891608	22437.9	0.819516	0.293691	0.0340686	TRUE
FALSE	High	Master Protein	Q02224	Centromere-associated protein E [OS=Homo sapiens]	0	FALSE	233.739	18	46	89	45	1	2701	316.2	5.64	255.57	46	0	11827.6	10968.1	10004.7	10095.9	8841.4	8284.4		11827.6	11815.5	9669.98	9859.47	10030	9738.67	11821.6	9764.72	0.82601	9884.35	0.836129	0.137855	0.244682	TRUE
FALSE	High	Master Protein	Q06187-2	Isoform BTK-C of Tyrosine-protein kinase BTK [OS=Homo sapiens]	0	FALSE	233.349	43	28	125	28	1	693	79.9	7.46	451.5	28	0	14757	13644	14038.6	13577.8	10504.7	10189.9		14757	14698.2	13568.9	13259.8	11916.9	11978.7	14727.6	13414.4	0.910834	11947.8	0.811254	0.379607	0.157378	TRUE
FALSE	High	Master Protein	P46087-4	Isoform 4 of Probable 28S rRNA (cytosine(4447)-C(5))-methyltransferase [OS=Homo sapiens]	0	FALSE	233.317	34	27	119	27	1	845	92.8	9.19	379.48	27	0	12570.5	11721.9	10959.8	10667.8	10732.7	10579.6		12570.5	12627.5	10593.1	10418	12175.6	12436.8	12599	10505.6	0.833838	12306.2	0.976757	0.15536	0.834862	TRUE
FALSE	High	Master Protein	P61158	actin-related protein 3 [OS=Homo sapiens]	0	FALSE	233.15	67	21	145	19	1	418	47.3	5.88	486.94	21	2	18332	16871.5	20770.8	20281.6	14423.6	13797.2		18332	18175	20075.9	19806.6	16362.7	16219.2	18253.5	19941.3	1.09246	16291	0.892483	0.490828	0.410909	FALSE
FALSE	High	Master Protein	Q9BW19	Kinesin-like protein KIFC1 [OS=Homo sapiens]	0	FALSE	233.129	48	28	110	28	1	673	73.7	8.98	389.79	28	0	11055.7	9863.2	12660.4	12120.1	9289.7	8872.6		11055.7	10625.2	12236.8	11836.3	10538.6	10430.1	10840.5	12036.5	1.11033	10484.4	0.96715	0.526698	0.909674	FALSE
FALSE	High	Master Protein	P28066-1	Proteasome subunit alpha type-5 [OS=Homo sapiens]	0	FALSE	233.092	63	14	166	14	1	241	26.4	4.79	681.94	14	0	14928	14316.8	15518.8	15178.5	13273.4	12770.8		14928	15422.9	14999.6	14823	15057.9	15012.6	15175.5	14911.3	0.982594	15035.2	0.99076	0.870123	0.915204	TRUE
FALSE	High	Master Protein	P67809	Nuclease-sensitive element-binding protein 1 [OS=Homo sapiens]	0	FALSE	232.892	61	20	246	14	1	324	35.9	9.88	830.95	20	6	22484.8	20697.5	20674.7	20015.5	21355.2	20266.7		22484.8	22296.6	19983	19546.8	24226.2	23824.4	22390.7	19764.9	0.882727	24025.3	1.073	0.254096	0.770075	FALSE
FALSE	High	Master Protein	Q86UE4	protein LYRIC [OS=Homo sapiens]	0	FALSE	232.871	44	26	77	26	1	582	63.8	9.32	344.54	26	0	10598.2	9648.5	11458.4	11060.5	9161.7	8545.8		10598.2	10394	11075	10801.5	10393.4	10046	10496.1	10938.3	1.04213	10219.7	0.973666	0.851032	0.951172	FALSE
FALSE	High	Master Protein	O95155-4	Isoform 4 of Ubiquitin conjugation factor E4 B [OS=Homo sapiens]	0	FALSE	232.859	30	29	89	28	1	1353	151.5	5.62	325.32	29	1	9785.3	9119.7	10425.7	10252.5	7925.6	7467.8		9785.3	9824.3	10076.9	10012.4	8991.11	8778.72	9804.8	10044.6	1.02446	8884.92	0.90618	0.933806	0.54716	FALSE
FALSE	High	Master Protein	Q07157	Tight junction protein ZO-1 [OS=Homo sapiens]	0	FALSE	232.713	25	37	94	1	1	1748	195.3	6.7	336.72	37	32	12411.8	11151.1	12697.2	12108.8	10061.7	9425.6		12411.8	12012.6	12272.4	11825.2	11414.4	11080.2	12212.2	12048.8	0.986619	11247.3	0.920986	0.9018	0.62883	TRUE
FALSE	High	Master Protein	Q99536	Synaptic vesicle membrane protein VAT-1 homolog [OS=Homo sapiens]	0	FALSE	232.627	61	19	218	19	1	393	41.9	6.29	806.88	19	0	17459.2	16122.9	15960.5	15801	24297.7	22980.8		17459.2	17368.6	15426.5	15431	27564.3	27014.9	17413.9	15428.7	0.886002	27289.6	1.56712	0.260133	0.000552581	FALSE
FALSE	High	Master Protein	P23396-1	40S ribosomal protein S3 [OS=Homo sapiens]	0	FALSE	232.4	86	29	325	29	1	243	26.7	9.66	1013.13	29	0	42860.7	40651.4	42176.1	41658.4	36791.6	35561.7		42860.7	43792.2	40765	40682.8	41737.8	41804.3	43326.4	40723.9	0.939933	41771.1	0.964101	0.57675	0.519088	TRUE
FALSE	High	Master Protein	P21964-1	Catechol O-methyltransferase [OS=Homo sapiens]	0	FALSE	232.236	67	18	91	18	1	271	30	5.47	361.15	18	0	11957	11082.6	11846	11802.4	10166.9	9768.2		11957	11938.9	11449.7	11526	11533.7	11482.9	11947.9	11487.8	0.961492	11508.3	0.963208	0.693661	0.758721	TRUE
FALSE	High	Master Protein	Q9BVJ6-1	U3 small nucleolar RNA-associated protein 14 homolog A [OS=Homo sapiens]	0	FALSE	232.135	42	28	70	28	1	771	87.9	7.87	274.5	28	0	9230.4	8640.9	7069	6957.2	5255.7	5228.5		9230.4	9308.51	6832.5	6794.27	5962.27	6146.33	9269.45	6813.38	0.735036	6054.3	0.653145	0.0349028	0.0262855	TRUE
FALSE	High	Master Protein	Q9NQC3	Reticulon-4 [OS=Homo sapiens]	0	FALSE	231.692	29	20	114	20	1	1192	129.9	4.5	443.93	20	0	7918.5	7482.9	11207.9	11459.3	9413.4	9215.3	Acetyl [N-Term]	7918.5	8061.04	10832.9	11190.9	10678.9	10833	7989.77	11011.9	1.37825	10756	1.34622	0.0292025	0.068502	TRUE
FALSE	High	Master Protein	A3KN83-1	protein strawberry notch homolog 1 [OS=Homo sapiens]	0	FALSE	231.556	31	34	92	28	1	1393	154.2	7.88	292.32	34	6	12086.7	11155.7	11425.7	11109.5	9235.1	8818.7		12086.7	12017.6	11043.4	10849.3	10476.7	10366.8	12052.2	10946.4	0.908251	10421.7	0.864718	0.410959	0.350162	TRUE
FALSE	High	Master Protein	Q13459-1	Unconventional myosin-IXb [OS=Homo sapiens]	0	FALSE	231.502	23	40	75	40	1	2157	243.2	8.75	267.54	40	0	8868.9	8435.9	8548.9	8261.2	7838.1	7530.6		8868.9	9087.67	8262.88	8067.74	8891.85	8852.54	8978.28	8165.31	0.909451	8872.2	0.988184	0.427622	0.972615	TRUE
FALSE	High	Master Protein	Q7Z2W4-3	Isoform 3 of Zinc finger CCCH-type antiviral protein 1 [OS=Homo sapiens]	0	FALSE	231.48	57	25	123	3	1	624	67.5	8.72	427.31	25	0	547.2	530.9	624.2	602.1	698.1	700.9		547.2	571.918	603.316	588	791.952	823.938	559.559	595.658	1.06451	807.945	1.4439	0.852614	0.0310556	TRUE
FALSE	High	Master Protein	P04792	Heat shock protein beta-1 [OS=Homo sapiens]	0	FALSE	231.434	87	17	192	17	1	205	22.8	6.4	775.67	17	0	24548.2	23285.7	26527.8	25770.8	18363.8	18028.8		24548.2	25084.8	25640.3	25167.3	20832.6	21193.6	24816.5	25403.8	1.02367	21013.1	0.84674	0.838489	0.0655309	FALSE
FALSE	High	Master Protein	Q15833-1	Syntaxin-binding protein 2 [OS=Homo sapiens]	0	FALSE	231.333	63	32	131	31	1	593	66.4	6.55	455.59	32	1	12625	11366.9	13353.3	13466.4	10738.2	10319		12625	12245.1	12906.5	13151	12181.8	12130.4	12435.1	13028.8	1.04775	12156.1	0.977569	0.781646	0.839483	FALSE
FALSE	High	Master Protein	P28074-1	proteasome subunit beta type-5 [OS=Homo sapiens]	0	FALSE	231.204	67	18	208	18	1	263	28.5	6.92	723.88	18	0	18169.2	16615.4	17842.2	17914.6	16617.1	16089.4		18169.2	17899.1	17245.3	17495.1	18851.1	18913.8	18034.2	17370.2	0.963181	18882.4	1.04704	0.721124	0.793935	FALSE
FALSE	High	Master Protein	Q9H2U1	ATP-dependent RNA helicase DHX36 [OS=Homo sapiens]	0	FALSE	230.749	32	29	108	28	1	1008	114.7	7.68	393.41	29	1	9810	8991.3	9237.7	8891.2	8233.9	7924.2		9810	9685.98	8928.64	8682.98	9340.86	9315.24	9747.99	8805.81	0.903346	9328.05	0.95692	0.38887	0.845061	TRUE
FALSE	High	Master Protein	P27348	14-3-3 protein theta [OS=Homo sapiens]	0	FALSE	230.627	78	24	266	17	1	245	27.7	4.78	950.78	24	10	31349.7	28593.9	33724.7	33854.6	28708.7	27511.5		31349.7	30803.1	32596.4	33061.8	32568.3	32340.9	31076.4	32829.1	1.0564	32454.6	1.04435	0.663801	0.91325	TRUE
FALSE	High	Master Protein	P19623	spermidine synthase [OS=Homo sapiens]	0	FALSE	230.31	65	16	135	16	1	302	33.8	5.49	543.81	16	0	12761.9	12135.4	11612.6	11295.1	11611.7	11209.1		12761.9	13073	11224.1	11030.6	13172.8	13176.8	12917.4	11127.3	0.861419	13174.8	1.01992	0.23054	0.927348	FALSE
FALSE	High	Master Protein	P43304	Glycerol-3-phosphate dehydrogenase, mitochondrial [OS=Homo sapiens]	0	FALSE	230.265	41	28	126	28	1	727	80.8	7.69	416.93	28	0	8956.4	8689.4	15599.9	15517.4	8364.8	8382.5		8956.4	9360.75	15078	15154	9489.36	9853.99	9158.58	15116	1.65047	9671.67	1.05602	0.000211931	0.709151	TRUE
FALSE	High	Master Protein	O00443	phosphatidylinositol 4-phosphate 3-kinase C2 domain-containing subunit alpha [OS=Homo sapiens]	0	FALSE	229.722	27	42	89	42	1	1686	190.6	8.02	274.15	42	0	9635	9048.5	10914.6	10617.5	9895.7	9471.1		9635	9747.6	10549.4	10368.9	11226.1	11133.7	9691.3	10459.1	1.07923	11179.9	1.1536	0.683431	0.389727	TRUE
FALSE	High	Master Protein	Q96P70	Importin-9 [OS=Homo sapiens]	0	FALSE	229.593	31	24	116	24	1	1041	115.9	4.81	400.78	24	0	12370.7	11530.4	12270.9	11826.3	11587.5	10980		12370.7	12421.3	11860.4	11549.3	13145.3	12907.5	12396	11704.9	0.944246	13026.4	1.05086	0.594287	0.775529	FALSE
FALSE	High	Master Protein	Q92620	Pre-mRNA-splicing factor ATP-dependent RNA helicase PRP16 [OS=Homo sapiens]	0	FALSE	229.546	33	33	71	31	1	1227	140.4	6.54	250.1	33	3	10285.4	9645.9	9814.7	9457.4	8981.4	8592.8		10285.4	10391.2	9486.33	9235.92	10188.9	10101.2	10338.3	9361.13	0.905482	10145	0.981308	0.398399	1	TRUE
FALSE	High	Master Protein	P28340	DNA polymerase delta catalytic subunit [OS=Homo sapiens]	0	FALSE	229.496	41	40	81	39	1	1107	123.6	7.03	296.41	40	0	11197.5	10326.5	8968.1	8682.9	7051.9	6837		11197.5	11124.3	8668.06	8479.56	7999.95	8037.19	11160.9	8573.81	0.768199	8018.57	0.718451	0.0513062	0.0351727	TRUE
FALSE	High	Master Protein	Q9H1A4	anaphase-promoting complex subunit 1 [OS=Homo sapiens]	0	FALSE	229.492	22	39	94	39	1	1944	216.4	6.3	304.45	39	0	12518.3	11623.9	11488.1	11393.2	9508.8	9070.4		12518.3	12522	11103.7	11126.4	10787.2	10662.6	12520.1	11115.1	0.887775	10724.9	0.856612	0.323674	0.317683	TRUE
FALSE	High	Master Protein	Q9H4A3-7	Isoform 6 of Serine/threonine-protein kinase WNK1 [OS=Homo sapiens]	0	FALSE	229.427	15	36	117	32	1	2833	299.5	6.48	410.81	36	4	9744.5	8787	12749.3	12439.5	7412.4	7034.6		9744.5	9465.89	12322.8	12148.2	8408.92	8269.47	9605.2	12235.5	1.27384	8339.2	0.868196	0.118109	0.364724	FALSE
FALSE	High	Master Protein	P09012	U1 SMALL NUCLEAR RIBONUCLEOPROTEIN A [OS=Homo sapiens]	0	FALSE	229.317	36	10	264	8	1	282	31.3	9.83	990.85	10	2	19237.7	17583.9	19173.4	19078.1	17091.1	16760		19237.7	18942.5	18531.9	18631.3	19388.8	19702.1	19090.1	18581.6	0.973366	19545.5	1.02385	0.798364	0.907775	FALSE
FALSE	High	Master Protein	P52292	Importin subunit alpha-1 [OS=Homo sapiens]	0	FALSE	228.959	66	24	141	24	1	529	57.8	5.4	541.87	24	0	16829.8	15951.4	21588	20280.9	14976.3	14328.1		16829.8	17183.8	20865.7	19806	16989.7	16843.3	17006.8	20335.8	1.19575	16916.5	0.99469	0.156372	0.937944	FALSE
FALSE	High	Master Protein	Q96T23	remodeling and spacing factor 1 [OS=Homo sapiens]	0	FALSE	228.761	25	32	75	32	1	1441	163.7	5.01	269.71	32	0	13434.2	12210.8	16301.6	16164.7	11958.6	11505.9		13434.2	13154.2	15756.2	15786.1	13566.3	13525.7	13294.2	15771.2	1.18632	13546	1.01894	0.286824	0.932239	TRUE
FALSE	High	Master Protein	Q6PD62	RNA polymerase-associated protein CTR9 homolog [OS=Homo sapiens]	0	FALSE	228.705	26	30	99	30	1	1173	133.4	6.77	350.45	30	0	11169.5	10193.8	10390.3	10357.3	8362.9	8241.8		11169.5	10981.4	10042.7	10114.7	9487.2	9688.59	11075.4	10078.7	0.910005	9587.9	0.86569	0.419035	0.354193	TRUE
FALSE	High	Master Protein	Q9H9G7	Protein argonaute-3 [OS=Homo sapiens]	0	FALSE	228.698	43	30	86	15	1	860	97.3	9.11	308.76	30	1	3758.1	3334.5	5317.7	5308.8	3536.1	3485.6		3758.1	3592.13	5139.79	5184.48	4011.49	4097.47	3675.11	5162.13	1.40462	4054.48	1.10323	0.0456078	0.449727	TRUE
FALSE	High	Master Protein	Q9NZB2-6	Isoform F of Constitutive coactivator of PPAR-gamma-like protein 1 [OS=Homo sapiens]	0	FALSE	228.673	41	34	77	32	1	1146	125.2	9	298.93	34	2	6249.4	5920.8	5887.5	5691.4	5432.5	5217.5		6249.4	6378.25	5690.52	5558.12	6162.84	6133.39	6313.82	5624.32	0.890795	6148.12	0.973755	0.354294	0.971141	TRUE
FALSE	High	Master Protein	O75116	Rho-associated protein kinase 2 [OS=Homo sapiens]	0	FALSE	228.644	27	37	101	32	1	1388	160.8	6.02	317.68	37	5	16122.2	14578	11609.3	11228.5	11732	10848.9		16122.2	15704.3	11220.9	10965.5	13309.2	12753.3	15913.3	11093.2	0.697106	13031.3	0.818896	0.0117072	0.174372	TRUE
FALSE	High	Master Protein	P15531-2	Isoform 2 of Nucleoside diphosphate kinase A [OS=Homo sapiens]	0	FALSE	228.57	60	13	366	1	1	177	19.6	5.58	1319.26	13	0	715.2	600.5	669.3	637.4	619.3	601.2		715.2	646.895	646.908	622.473	702.558	706.736	681.048	634.69	0.931932	704.647	1.03465	0.602987	0.812349	FALSE
FALSE	High	Master Protein	Q13283	Ras GTPase-activating protein-binding protein 1 [OS=Homo sapiens]	0	FALSE	228.554	55	19	333	19	1	466	52.1	5.52	996.61	19	0	26385.9	24262.2	23972.4	23737.4	18265.9	17251		26385.9	26136.7	23170.4	23181.5	20721.6	20279.3	26261.3	23175.9	0.882513	20500.4	0.780632	0.253188	0.0118761	TRUE
FALSE	High	Master Protein	Q5T8P6	RNA-binding protein 26 [OS=Homo sapiens]	0	FALSE	228.521	31	31	98	11	1	1007	113.5	9.16	348.74	31	21	13815.6	12371.3	15556.6	15593.3	11744.6	11421.1		13815.6	13327.1	15036.1	15228.1	13323.5	13426	13571.4	15132.1	1.115	13374.8	0.985514	0.509503	0.884957	FALSE
FALSE	High	Master Protein	Q7Z6E9	E3 ubiquitin-protein ligase RBBP6 [OS=Homo sapiens]	0	FALSE	228.451	20	33	105	33	1	1792	201.4	9.64	348.75	33	0	11846.7	10490.6	13742	13586.1	9011.9	8671.1		11846.7	11301.1	13282.2	13267.9	10223.5	10193.2	11573.9	13275.1	1.14698	10208.4	0.882014	0.400096	0.426223	FALSE
FALSE	High	Master Protein	Q9UKX7	Nuclear pore complex protein Nup50 [OS=Homo sapiens]	0	FALSE	228.252	53	20	119	20	1	468	50.1	7.06	426.04	20	0	9635.4	8905	10588.5	10321.3	8402.8	8211.7		9635.4	9593.01	10234.2	10079.6	9532.47	9653.21	9614.21	10156.9	1.05645	9592.84	0.997777	0.785075	0.934472	FALSE
FALSE	High	Master Protein	Q9BQ52-1	Zinc phosphodiesterase ELAC protein 2 [OS=Homo sapiens]	0	FALSE	227.983	44	27	87	27	1	826	92.2	7.9	302.28	27	0	8640	8222	9170.2	9126.5	6724.5	6672.1		8640	8857.24	8863.4	8912.77	7628.54	7843.34	8748.62	8888.08	1.01594	7735.94	0.884247	0.974046	0.556845	FALSE
FALSE	High	Master Protein	P78406	mRNA export factor [OS=Homo sapiens]	0	FALSE	227.716	62	21	163	21	1	368	40.9	7.83	560.85	21	0	17937	16136.3	15680.5	15558.1	15508.9	15046.8		17937	17383	15155.9	15193.8	17593.9	17688.2	17660	15174.8	0.859276	17641	0.998926	0.163797	0.962513	TRUE
FALSE	High	Master Protein	O43852-3	Isoform 3 of Calumenin [OS=Homo sapiens]	0	FALSE	227.657	62	20	59	6	1	323	38	4.63	282.88	20	18	19369.7	17379.9	19035.9	18814.8	23693.1	22497.3		19369.7	18722.7	18399	18374.2	26878.4	26446.5	19046.2	18386.6	0.965369	26662.5	1.39988	0.737508	0.0171331	FALSE
FALSE	High	Master Protein	Q8N1G4	Leucine-rich repeat-containing protein 47 [OS=Homo sapiens]	0	FALSE	227.477	61	28	137	28	1	583	63.4	8.28	448.26	28	0	12499.5	11424.8	8808	8587.5	11551.9	10901.6		12499.5	12307.5	8513.32	8386.39	13104.9	12815.3	12403.5	8449.85	0.681248	12960.1	1.04488	0.00808682	0.804403	FALSE
FALSE	High	Master Protein	O43379-4	Isoform 4 of WD repeat-containing protein 62 [OS=Homo sapiens]	0	FALSE	227.353	23	27	70	27	1	1523	166.4	5.88	252.31	27	0	6035.9	5809.7	7552.8	7364.9	5500.9	5302.3		6035.9	6258.56	7300.11	7192.43	6240.44	6233.08	6147.23	7246.27	1.17879	6236.76	1.01456	0.415393	0.790513	TRUE
FALSE	High	Master Protein	Q86U86-1	Protein polybromo-1 [OS=Homo sapiens]	0	FALSE	227.036	24	40	101	40	1	1689	192.8	6.89	333.07	40	0	13361.5	11922.2	14149.2	13802.8	10071.2	9789.2		13361.5	12843.3	13675.8	13479.6	11425.2	11507.6	13102.4	13577.7	1.03627	11466.4	0.875136	0.832154	0.3428	FALSE
FALSE	High	Master Protein	P22695	Cytochrome b-c1 complex subunit 2, mitochondrial [OS=Homo sapiens]	0	FALSE	227.033	53	20	109	20	1	453	48.4	8.63	421.6	20	0	14799.9	13942.9	18626.6	19402.4	13373.8	13718.4		14799.9	15020.1	18003.4	18948	15171.8	16126.6	14910	18475.7	1.23915	15649.2	1.04957	0.172095	0.781696	TRUE
FALSE	High	Master Protein	O60832-1	H/ACA ribonucleoprotein complex subunit 4 [OS=Homo sapiens]	0	FALSE	227.012	48	27	90	27	1	514	57.6	9.42	312.21	27	0	17109.3	15427.1	17073.8	17194.2	15052.8	15087.5		17109.3	16619	16502.6	16791.5	17076.5	17736	16864.2	16647.1	0.987126	17406.2	1.03214	0.905804	0.86672	FALSE
FALSE	High	Master Protein	Q15155	Nodal modulator 1 [OS=Homo sapiens]	0	FALSE	226.99	31	27	86	1	1	1222	134.2	5.81	309.58	27	0	199.4	165.5	164.4	182.4	193.2	185.6		199.4	178.287	158.9	178.128	219.174	218.181	188.843	168.514	0.892349	218.677	1.15798	0.547918	0.33102	FALSE
FALSE	High	Master Protein	Q96FV9-1	THO complex subunit 1 [OS=Homo sapiens]	0	FALSE	226.889	49	34	123	34	1	657	75.6	4.98	355.01	34	0	15627.5	14123.3	13844.9	13492	11940.2	11705		15627.5	15214.5	13381.7	13176	13545.4	13759.7	15421	13278.9	0.86109	13652.6	0.885324	0.169338	0.38188	TRUE
FALSE	High	Master Protein	Q9NZJ4-1	Sacsin [OS=Homo sapiens]	0	FALSE	226.829	11	45	73	45	1	4579	520.8	7.05	246.46	45	0	6452.7	6309.4	7316.1	7009.5	5605.6	5378.3		6452.7	6796.87	7071.33	6845.35	6359.21	6322.42	6624.79	6958.34	1.05035	6340.82	0.957135	0.859151	0.942572	FALSE
FALSE	High	Master Protein	O14578-3	Isoform 3 of Citron Rho-interacting kinase [OS=Homo sapiens]	0	FALSE	226.795	24	37	75	1	1	1544	176.9	6.58	265.15	37	0	230	187.3	281.2	287.4	151.6	144		230	201.771	271.792	280.67	171.981	169.278	215.886	276.231	1.27952	170.63	0.790371	0.244387	0.450238	FALSE
FALSE	High	Master Protein	Q15366-5	Isoform 5 of Poly(rC)-binding protein 2 [OS=Homo sapiens]	0	FALSE	226.77	85	19	232	1	1	335	35.3	8	883.83	19	0	350.8	343.3	374	368.2	337.3	327.8		350.8	369.824	361.487	359.577	382.646	385.343	360.312	360.532	1.00061	383.995	1.06573	0.989345	0.657843	TRUE
FALSE	High	Master Protein	P51531	Probable global transcription activator SNF2L2 [OS=Homo sapiens]	0	FALSE	226.72	24	32	97	17	1	1590	181.2	7.2	320.86	32	0	4136.8	3749.2	5021.4	4929.9	3197.3	3023.4		4136.8	4038.87	4853.4	4814.45	3627.14	3554.14	4087.83	4833.93	1.18252	3590.64	0.878372	0.405317	0.532473	FALSE
FALSE	High	Master Protein	Q9Y6R4-1	Mitogen-activated protein kinase kinase kinase 4 [OS=Homo sapiens]	0	FALSE	226.479	25	35	91	33	1	1608	181.6	6.32	294.53	35	1	9725.2	8999.7	7645.5	7496.7	8176.8	7719.6		9725.2	9695.03	7389.71	7321.14	9276.08	9074.72	9710.11	7355.42	0.757501	9175.4	0.944933	0.0523854	0.77068	TRUE
FALSE	High	Master Protein	P60228	Eukaryotic translation initiation factor 3 subunit E [OS=Homo sapiens]	0	FALSE	226.4	58	24	139	24	1	445	52.2	6.04	500.8	24	0	12448.1	11644.4	12039	11679	14299.5	13437.4		12448.1	12544.1	11636.2	11405.5	16221.9	15796.2	12496.1	11520.9	0.921958	16009.1	1.28113	0.4765	0.0838125	FALSE
FALSE	High	Master Protein	P27816-4	Isoform 4 of Microtubule-associated protein 4 [OS=Homo sapiens]	0	FALSE	226.382	32	27	156	3	1	872	91.1	9.42	500.86	27	0	1250.5	1212.6	756.4	676	1499.6	1361.2		1250.5	1306.29	731.093	660.169	1701.21	1600.15	1278.39	695.631	0.544145	1650.68	1.29121	0.00401881	0.105417	FALSE
FALSE	High	Master Protein	P11766	alcohol dehydrogenase class-3 [OS=Homo sapiens]	0	FALSE	226.289	66	20	276	20	1	374	39.7	7.49	987	20	0	34420.4	32299	32822.1	32570.4	21045.1	20354.8		34420.4	34794.5	31724	31807.7	23874.4	23927.9	34607.4	31765.8	0.91789	23901.2	0.690637	0.433911	0.000595641	TRUE
FALSE	High	Master Protein	Q5JPE7	NODAL modulator 2 [OS=Homo sapiens]	0	FALSE	226.253	30	27	86	1	1	1267	139.4	5.76	308.69	27	25	8824	8207.6	8461.9	8316.7	9955.7	9482.9		8824	8841.73	8178.79	8121.94	11294.1	11147.6	8832.86	8150.37	0.922732	11220.8	1.27035	0.488281	0.149031	FALSE
FALSE	High	Master Protein	Q8N201	integrator complex subunit 1 [OS=Homo sapiens]	0	FALSE	225.998	21	37	74	37	1	2190	244.1	6.13	243.71	37	0	7457.4	7001.4	7126.9	6865.4	6361.6	6195.9		7457.4	7542.34	6888.46	6704.62	7216.85	7283.55	7499.87	6796.54	0.906221	7250.2	0.96671	0.413562	0.996551	TRUE
FALSE	High	Master Protein	O94874-1	E3 UFM1-protein ligase 1 [OS=Homo sapiens]	0	FALSE	225.914	42	30	92	29	1	794	89.5	6.79	331.25	30	1	11318.8	10698.2	14527.7	14262.1	10216.2	10045.7		11318.8	11524.8	14041.7	13928.1	11589.7	11809.2	11421.8	13984.9	1.2244	11699.4	1.02431	0.199957	0.905526	TRUE
FALSE	High	Master Protein	Q13347	Eukaryotic translation initiation factor 3 subunit I [OS=Homo sapiens]	0	FALSE	225.896	85	22	174	22	1	325	36.5	5.64	563.01	22	0	19030.6	17670.4	17631.2	17042.2	19352.5	18286.9		19030.6	19035.6	17041.3	16643.1	21954.2	21497	19033.1	16842.2	0.88489	21725.6	1.14146	0.25547	0.465184	FALSE
FALSE	High	Master Protein	Q13618	Cullin-3 [OS=Homo sapiens]	0	FALSE	225.85	40	29	95	29	1	768	88.9	8.48	348.09	29	0	11288.4	10452.9	11627.1	11391.2	10601.6	10083.2		11288.4	11260.5	11238.1	11124.4	12026.9	11853.2	11274.5	11181.3	0.991735	11940.1	1.05904	0.880296	0.736539	FALSE
FALSE	High	Master Protein	P63279	SUMO-conjugating enzyme ubc9 [OS=Homo sapiens]	0	FALSE	225.838	56	11	258	11	1	158	18	8.66	783.52	11	0	21264.9	19606.2	20482.4	20925.3	18565.3	17687.7		21264.9	21121	19797.1	20435.3	21061.2	20792.6	21193	20116.2	0.949193	20926.9	0.987448	0.642738	0.684258	TRUE
FALSE	High	Master Protein	P40925-3	Isoform 3 of Malate dehydrogenase, cytoplasmic [OS=Homo sapiens]	0	FALSE	225.543	52	21	205	21	1	352	38.6	7.71	730.01	21	0	28021	25074.4	26835.9	27436.4	23739.1	23045.8		28021	27011.7	25938.1	26793.9	26930.6	27091.3	27516.3	26366	0.958193	27010.9	0.981633	0.709703	0.641246	TRUE
FALSE	High	Master Protein	P14314	Glucosidase 2 subunit beta [OS=Homo sapiens]	0	FALSE	225.325	43	23	113	23	1	528	59.4	4.41	436.02	23	0	15012.3	13338.1	17934.1	17658.1	15356.1	14378.7		15012.3	14368.6	17334.1	17244.6	17420.6	16902.8	14690.5	17289.3	1.17691	17161.7	1.16822	0.311727	0.307241	TRUE
FALSE	High	Master Protein	O15247	Chloride intracellular channel protein 2 [OS=Homo sapiens]	0	FALSE	225.263	75	19	161	18	1	247	28.3	5.59	513.93	19	0	14210.2	13351	12814.1	12821.4	15452.6	14802.5		14210.2	14382.5	12385.4	12521.1	17530	17401	14296.4	12453.3	0.87108	17465.5	1.22168	0.202384	0.175034	FALSE
FALSE	High	Master Protein	P35249	replication factor C subunit 4 [OS=Homo sapiens]	0	FALSE	225.086	72	27	140	27	1	363	39.7	8.02	466.44	27	0	17660.7	15802.4	18000.9	18183.7	12384.4	12017.7		17660.7	17023.3	17398.7	17757.9	14049.4	14127.3	17342	17578.3	1.01362	14088.3	0.812382	0.933736	0.159805	FALSE
FALSE	High	Master Protein	Q9UPT5-1	Isoform 1 of Exocyst complex component 7 [OS=Homo sapiens]	0	FALSE	224.475	43	24	81	24	1	684	78	6.76	299.07	24	0	8500.9	8100.7	10589.1	10455.3	7433.7	7076.4		8500.9	8726.57	10234.8	10210.5	8433.08	8318.61	8613.74	10222.6	1.18678	8375.85	0.972383	0.295799	0.942985	FALSE
FALSE	High	Master Protein	P37802-2	Isoform 2 of Transgelin-2 [OS=Homo sapiens]	0	FALSE	224.256	69	19	567	19	1	220	24.4	8.25	1541.78	19	0	53119.8	49680.3	63644.3	62379.1	46508.3	44803.8		53119.8	53518.7	61515	60918.3	52760.9	52668.8	53319.2	61216.6	1.14812	52714.8	0.988664	0.279487	0.693395	FALSE
FALSE	High	Master Protein	Q12873-3	Isoform 3 of Chromodomain-helicase-DNA-binding protein 3 [OS=Homo sapiens]	0	FALSE	224.209	21	39	82	25	1	2059	232.9	6.23	267.38	39	0	4385.2	4165.9	4717.3	4520.1	3065.1	3056.8		4385.2	4487.76	4559.48	4414.25	3477.17	3593.4	4436.48	4486.86	1.01136	3535.28	0.796867	0.969929	0.365127	FALSE
FALSE	High	Master Protein	O00232-1	26s proteasome non-atpase regulatory subunit 12 [OS=Homo sapiens]	0	FALSE	224.038	55	27	112	27	1	456	52.9	7.65	366.05	27	0	20039.2	18711.4	19893.1	20183.8	17718.4	17323.5		20039.2	20157.1	19227.5	19711.1	20100.5	20364.5	20098.1	19469.3	0.968714	20232.5	1.00668	0.762787	0.833296	FALSE
FALSE	High	Master Protein	Q14258	E3 ubiquitin/ISG15 ligase TRIM25 [OS=Homo sapiens]	0	FALSE	223.698	56	27	99	27	1	630	70.9	8.09	377.3	27	0	14209.3	12928.9	10289.1	9976.4	11289.1	10766.2		14209.3	13927.8	9944.86	9742.77	12806.8	12656.1	14068.6	9843.82	0.699704	12731.5	0.904959	0.0124211	0.46452	TRUE
FALSE	High	Master Protein	P48681	Nestin [OS=Homo sapiens]	0	FALSE	223.687	30	35	66	35	1	1621	177.3	4.36	258.95	35	0	9074.1	8498.4	10933.1	10608.7	7940.4	7692		9074.1	9155	10567.3	10360.3	9007.9	9042.28	9114.55	10463.8	1.14803	9025.09	0.990185	0.414662	0.964651	FALSE
FALSE	High	Master Protein	P05091	Aldehyde dehydrogenase, mitochondrial [OS=Homo sapiens]	0	FALSE	223.549	51	24	102	20	1	517	56.3	7.05	375.04	24	0	9263.7	8608.8	9512.3	9647.1	5325.3	5161.1		9263.7	9273.93	9194.05	9421.18	6041.23	6067.09	9268.81	9307.62	1.00419	6054.16	0.653176	0.959786	0.0263	FALSE
FALSE	High	Master Protein	Q06203	amidophosphoribosyltransferase [OS=Homo sapiens]	0	FALSE	223.415	49	24	117	24	1	517	57.4	6.76	392.05	24	0	15416.4	14329.4	13845.2	13759.7	13169.6	12698.8		15416.4	15436.5	13382	13437.5	14940.1	14928	15426.5	13409.7	0.869268	14934	0.96808	0.196068	0.785877	TRUE
FALSE	High	Master Protein	P51114-1	Fragile X mental retardation syndrome-related protein 1 [OS=Homo sapiens]	0	FALSE	223.376	43	25	74	22	1	621	69.7	6.15	297.84	25	3	12193.2	11129.6	12728.7	12525.8	9394.7	9067		12193.2	11989.5	12302.8	12232.5	10657.7	10658.6	12091.3	12267.7	1.01458	10658.2	0.881472	0.929404	0.423701	FALSE
FALSE	High	Master Protein	Q6DD88	Atlastin-3 [OS=Homo sapiens]	0	FALSE	223.289	40	19	92	19	1	541	60.5	5.66	344.66	19	0	7636.6	6972.2	8194.2	8074.4	10666.7	10197.2		7636.6	7510.88	7920.05	7885.31	12100.7	11987.2	7573.74	7902.68	1.04343	12044	1.59023	0.886174	0.000245332	TRUE
FALSE	High	Master Protein	Q08379	Golgin subfamily A member 2 [OS=Homo sapiens]	0	FALSE	223.278	39	28	63	28	1	1002	113	5.02	286.61	28	0	7748.8	7016.9	7553.6	7534.4	7194.7	6974.7		7748.8	7559.03	7300.88	7357.96	8161.95	8199.06	7653.92	7329.42	0.957604	8180.51	1.0688	0.667279	0.662273	FALSE
FALSE	High	Master Protein	P31689-1	DnaJ homolog subfamily A member 1 [OS=Homo sapiens]	0	FALSE	223.097	61	21	117	19	1	397	44.8	7.08	473.79	21	0	9608.6	8916	9554.7	9404.8	9013.5	8678.1		9608.6	9604.86	9235.03	9184.56	10225.3	10201.5	9606.73	9209.79	0.958681	10213.4	1.06315	0.677041	0.682862	FALSE
FALSE	High	Master Protein	Q08257	Quinone oxidoreductase [OS=Homo sapiens]	0	FALSE	222.843	85	22	121	22	1	329	35.2	8.44	456.89	22	0	10583	9506.6	10671.4	10777	8233.9	8194.4		10583	10241.1	10314.4	10524.6	9340.86	9632.87	10412	10419.5	1.00072	9486.86	0.911143	0.937553	0.573944	FALSE
FALSE	High	Master Protein	Q15366-3	Isoform 3 of Poly(rC)-binding protein 2 [OS=Homo sapiens]	0	FALSE	222.723	74	19	277	1	1	362	38.2	6.79	1042.92	19	22	31900.1	29922.7	33793	33271.2	29653.3	28453		31900.1	32234.6	32662.4	32492	33639.9	33447.7	32067.3	32577.2	1.0159	33543.8	1.04604	0.8815	0.904661	TRUE
FALSE	High	Master Protein	Q9P206-2	Isoform 2 of Uncharacterized protein KIAA1522 [OS=Homo sapiens]	0	FALSE	222.623	39	26	79	26	1	1094	113	10.02	315.61	26	0	5723.6	5264.7	5389.9	5447.9	6401.3	6275.1		5723.6	5671.46	5209.57	5320.32	7261.89	7376.65	5697.53	5264.95	0.924075	7319.27	1.28464	0.487015	0.0743784	FALSE
FALSE	High	Master Protein	O14974	Protein phosphatase 1 regulatory subunit 12A [OS=Homo sapiens]	0	FALSE	222.409	39	36	81	35	1	1030	115.2	5.4	322.66	36	1	10517.6	9375.3	13711.5	13220.4	9943.8	9328.9		10517.6	10099.6	13252.8	12910.8	11280.6	10966.5	10308.6	13081.8	1.26901	11123.6	1.07906	0.124705	0.625566	TRUE
FALSE	High	Master Protein	P57737-3	Isoform 3 of Coronin-7 [OS=Homo sapiens]	0	FALSE	222.091	33	27	71	27	1	1048	114.1	6.33	293.99	27	0	9046.4	8454.6	7923.7	7847.4	6809.5	6606.6		9046.4	9107.81	7658.6	7663.63	7724.97	7766.34	9077.11	7661.11	0.844004	7745.65	0.853317	0.198037	0.420083	TRUE
FALSE	High	Master Protein	Q8IWV8	E3 ubiquitin-protein ligase UBR2 [OS=Homo sapiens]	0	FALSE	222.059	26	37	71	37	1	1755	200.4	6.24	240.69	37	0	7558.2	6939	6736.6	6621.9	8388.5	7753.1		7558.2	7475.12	6511.22	6466.83	9516.25	9114.1	7516.66	6489.02	0.863285	9315.17	1.23927	0.253597	0.197816	FALSE
FALSE	High	Master Protein	Q96I24-1	Far upstream element-binding protein 3 [OS=Homo sapiens]	0	FALSE	222.049	59	29	171	25	1	572	61.6	8.38	657.94	29	0	11030.2	10120.5	10879.5	10777.6	10633.1	10158.6		11030.2	10902.4	10515.5	10525.2	12062.6	11941.9	10966.3	10520.4	0.959334	12002.2	1.09446	0.680887	0.576448	FALSE
FALSE	High	Master Protein	Q70CQ2	Ubiquitin carboxyl-terminal hydrolase 34 [OS=Homo sapiens]	0	FALSE	221.541	13	44	97	44	1	3546	404	5.82	289.95	44	0	10631.6	9733.9	11017.5	10716.2	9862.4	9443.4		10631.6	10486	10648.9	10465.2	11188.3	11101.1	10558.8	10557.1	0.999838	11144.7	1.05549	0.931941	0.711126	FALSE
FALSE	High	Master Protein	Q8N3D4	EH domain-binding protein 1-like protein 1 [OS=Homo sapiens]	0	FALSE	221.341	35	34	64	31	1	1523	161.8	4.83	244.38	34	3	5410.6	5062.1	6909.4	6748	4459.2	4303.3		5410.6	5453.2	6678.24	6589.97	5058.69	5058.71	5431.9	6634.1	1.22132	5058.7	0.931295	0.305172	0.748621	FALSE
FALSE	High	Master Protein	P49916-1	DNA ligase 3 [OS=Homo sapiens]	0	FALSE	221.246	36	36	104	36	1	1009	112.8	9.01	343.98	36	0	15207	13811.6	13957.4	13831.8	10481.8	10264.5		15207	14878.7	13490.4	13507.9	11891	12066.4	15042.9	13499.2	0.89738	11978.7	0.796303	0.311209	0.127797	TRUE
FALSE	High	Master Protein	Q9HCK8-1	Chromodomain-helicase-dna-binding protein 8 [OS=Homo sapiens]	0	FALSE	221.131	17	34	78	29	1	2581	290.3	6.47	278.09	34	5	7280.7	6524.3	7607.3	7468	5983.3	5803.9		7280.7	7028.38	7352.79	7293.11	6787.69	6822.73	7154.54	7322.95	1.02354	6805.21	0.951174	0.964515	0.909081	FALSE
FALSE	High	Master Protein	P18124	60S ribosomal protein L7 [OS=Homo sapiens]	0	FALSE	220.962	63	24	232	24	1	248	29.2	10.65	770.33	24	0	35766.1	33196.6	32734.9	33232.7	30958	29880.3		35766.1	35761.4	31639.7	32454.4	35120	35125.6	35763.8	32047.1	0.896077	35122.8	0.982077	0.315107	0.644492	TRUE
FALSE	High	Master Protein	Q13596	Sorting nexin-1 [OS=Homo sapiens]	0	FALSE	220.898	46	26	94	24	1	522	59	5.15	358.21	26	2	12834.2	12035.2	14355.9	13614.6	11082.2	10496.6		12834.2	12965.1	13875.6	13295.8	12572.1	12339.2	12899.6	13585.7	1.05318	12455.6	0.965582	0.758011	0.771917	FALSE
FALSE	High	Master Protein	O14979-1	Heterogeneous nuclear ribonucleoprotein D-like [OS=Homo sapiens]	0	FALSE	220.711	41	20	132	18	1	420	46.4	9.57	523.84	20	0	14992.3	13990.8	12937.6	12947.3	11915.5	11658.8		14992.3	15071.7	12504.8	12644.1	13517.4	13705.4	15032	12574.4	0.836509	13611.4	0.905495	0.105384	0.466904	TRUE
FALSE	High	Master Protein	Q96KP4	cytosolic non-specific dipeptidase [OS=Homo sapiens]	0	FALSE	220.631	62	24	78	24	1	475	52.8	5.97	311.83	24	0	12916.8	11850	14544	14567.7	10796.4	10299.8		12916.8	12765.5	14057.4	14226.5	12247.9	12107.9	12841.2	14142	1.1013	12177.9	0.948345	0.56078	0.677837	FALSE
FALSE	High	Master Protein	P62136-1	serine/threonine-protein phosphatase PP1-alpha catalytic subunit [OS=Homo sapiens]	0	FALSE	220.572	72	23	119	1	1	330	37.5	6.33	444.22	23	0	1644.3	1420.9	1637.8	1734.6	1219	1228.2		1644.3	1530.68	1583	1693.98	1382.88	1443.8	1587.49	1638.49	1.03213	1413.34	0.890299	0.910807	0.710251	FALSE
FALSE	High	Master Protein	P05141	ADP/ATP translocase 2 [OS=Homo sapiens]	0	FALSE	220.482	63	24	339	9	1	298	32.8	9.69	1146.98	24	17	36083.2	36548.1	45901.5	47402.1	37105.5	38180.3		36083.2	39371.9	44365.8	46292	42093.9	44882.6	37727.5	45328.9	1.20148	43488.3	1.15269	0.144891	0.422448	TRUE
FALSE	High	Master Protein	Q9UHB9	Signal recognition particle subunit SRP68 [OS=Homo sapiens]	0	FALSE	220.175	51	30	90	30	1	627	70.7	8.56	313.08	30	0	14951.7	13767	15496.6	15041.2	14842.9	14070.2		14951.7	14830.7	14978.1	14689	16838.4	16540.1	14891.2	14833.5	0.99613	16689.2	1.12075	0.977177	0.469449	FALSE
FALSE	High	Master Protein	P53041	Serine/threonine-protein phosphatase 5 [OS=Homo sapiens]	0	FALSE	219.894	50	27	110	27	1	499	56.8	6.28	380.17	27	0	16024.1	14810.8	16916.5	17040.3	12433.8	11880.8		16024.1	15955.1	16350.5	16641.2	14105.4	13966.4	15989.6	16495.9	1.03166	14035.9	0.877814	0.852661	0.352814	FALSE
FALSE	High	Master Protein	O95793	double-stranded RNA-binding protein Staufen homolog 1 [OS=Homo sapiens]	0	FALSE	219.604	42	26	112	24	1	577	63.1	9.44	419.98	26	2	13790.9	12523.1	13594.9	13387.8	9217.6	8808.6		13790.9	13490.7	13140.1	13074.3	10456.8	10354.9	13640.8	13107.2	0.960882	10405.8	0.762849	0.70404	0.080017	TRUE
FALSE	High	Master Protein	Q8IVI9	Nostrin [OS=Homo sapiens]	0	FALSE	219.386	46	22	73	22	1	506	57.6	8.97	315.23	22	0	9144.5	8254.7	12116.3	12450.8	5788	5593.3		9144.5	8892.47	11710.9	12159.2	6566.14	6575.16	9018.48	11935.1	1.3234	6570.65	0.728576	0.0650985	0.0913163	FALSE
FALSE	High	Master Protein	Q15008	26S proteasome non-ATPase regulatory subunit 6 [OS=Homo sapiens]	0	FALSE	219.377	56	28	144	1	1	389	45.5	5.62	431.55	28	0	1581	1450.7	1638.9	1633.1	1469.2	1394.3		1581	1562.78	1584.07	1594.86	1666.72	1639.06	1571.89	1589.46	1.01118	1652.89	1.05153	0.993476	0.6397	TRUE
FALSE	High	Master Protein	Q8IZ69	tRNA (uracil-5-)-methyltransferase homolog A [OS=Homo sapiens]	0	FALSE	218.978	56	33	90	33	1	625	68.7	7.94	312.36	33	0	11680.1	10621.5	9400.5	9376.1	7760.2	7572.4		11680.1	11442.1	9085.99	9156.53	8803.48	8901.68	11561.1	9121.26	0.78896	8852.58	0.76572	0.074767	0.084064	TRUE
FALSE	High	Master Protein	P22830-2	Isoform 2 of Ferrochelatase, mitochondrial [OS=Homo sapiens]	0	FALSE	218.956	62	23	109	23	1	429	48.6	8.72	407.76	23	0	15513.8	14902.1	9161.1	9137.4	7083.6	7059.6		15513.8	16053.5	8854.6	8923.42	8035.92	8298.86	15783.6	8889.01	0.563179	8167.39	0.51746	0.00032034	0.000201621	TRUE
FALSE	High	Master Protein	P61247	40S ribosomal protein S3a [OS=Homo sapiens]	0	FALSE	218.855	70	26	225	26	1	264	29.9	9.73	636.33	26	0	26836.6	25339.7	26815.9	26501.1	24239.2	23314.1		26836.6	27297.5	25918.7	25880.5	27497.9	27406.7	27067	25899.6	0.956869	27452.3	1.01423	0.699692	0.893808	FALSE
FALSE	High	Master Protein	Q16513	Serine/threonine-protein kinase N2 [OS=Homo sapiens]	0	FALSE	218.768	31	25	91	23	1	984	112	6.3	343.39	25	0	7839.4	7290.6	11836.2	11440.3	7596.3	7108.5		7839.4	7853.88	11440.2	11172.4	8617.54	8356.35	7846.64	11306.3	1.44091	8486.94	1.0816	0.0107035	0.616589	TRUE
FALSE	High	Master Protein	O15084-1	Isoform 3 of Serine/threonine-protein phosphatase 6 regulatory ankyrin repeat subunit A [OS=Homo sapiens]	0	FALSE	218.659	29	21	68	20	1	1086	116.5	6.18	278.68	21	1	5922.6	5551.8	6252.6	6138.1	4874.2	4663.2		5922.6	5980.74	6043.41	5994.36	5529.48	5481.79	5951.67	6018.88	1.01129	5505.64	0.925058	0.929008	0.716228	FALSE
FALSE	High	Master Protein	Q8IY67-2	Isoform 2 of Ribonucleoprotein PTB-binding 1 [OS=Homo sapiens]	0	FALSE	218.65	46	24	107	6	1	739	77.8	8.84	422.56	24	18	11020.8	10303.9	9423.5	9470.9	10124.7	9837.3		11020.8	11100	9108.22	9249.11	11485.9	11564.2	11060.4	9178.66	0.829868	11525	1.04201	0.146281	0.81835	FALSE
FALSE	High	Master Protein	Q86YP4-3	Isoform 3 of Transcriptional repressor p66-alpha [OS=Homo sapiens]	0	FALSE	218.326	51	25	110	23	1	634	68.1	9.94	362.56	25	2	13579.2	12077.1	9513.8	9548.7	12111.5	11831.3		13579.2	13010.2	9195.5	9325.09	13739.8	13908.2	13294.7	9260.29	0.69654	13824	1.03981	0.0115568	0.829065	FALSE
FALSE	High	Master Protein	P00367	Glutamate dehydrogenase 1, mitochondrial [OS=Homo sapiens]	0	FALSE	218.277	47	23	106	7	1	558	61.4	7.8	393.86	23	18	17546.3	16371.3	18872.2	18869.8	14011.6	13839.8		17546.3	17636.2	18240.8	18427.9	15895.3	16269.3	17591.2	18334.4	1.04224	16082.3	0.914222	0.805772	0.506718	FALSE
FALSE	High	Master Protein	P22087	rRNA 2'-O-methyltransferase fibrillarin [OS=Homo sapiens]	0	FALSE	218.227	59	20	136	18	1	321	33.8	10.18	525.16	20	2	22098.9	20307.7	21597.1	21398.5	19413.4	19068.5		22098.9	21876.7	20874.5	20897.4	22023.3	22415.8	21987.8	20886	0.949889	22219.6	1.01054	0.64782	0.86411	FALSE
FALSE	High	Master Protein	Q96KP1	exocyst complex component 2 [OS=Homo sapiens]	0	FALSE	217.561	39	33	89	33	1	924	104	6.9	337.38	33	0	12239.4	11421	13187.4	12903.5	10376.5	9995.1		12239.4	12303.4	12746.2	12601.3	11771.5	11749.7	12271.4	12673.8	1.03279	11760.6	0.958374	0.847648	0.732074	FALSE
FALSE	High	Master Protein	Q6P996-1	Pyridoxal-dependent decarboxylase domain-containing protein 1 [OS=Homo sapiens]	0	FALSE	217.554	37	22	67	22	1	788	86.7	5.38	286.74	22	0	8326.5	7826.4	10438.4	10240.2	11486.5	10988.5		8326.5	8431.08	10089.2	10000.4	13030.7	12917.5	8378.79	10044.8	1.19883	12974.1	1.54845	0.264022	0.000661417	TRUE
FALSE	High	Master Protein	Q12874	splicing factor 3a subunit 3 [OS=Homo sapiens]	0	FALSE	217.499	46	20	118	20	1	501	58.8	5.38	477.32	20	0	17065.8	16246.8	17217.4	17080.9	15164.5	14935.1		17065.8	17502	16641.4	16680.9	17203.2	17556.9	17283.9	16661.1	0.963967	17380	1.00556	0.726994	0.999091	FALSE
FALSE	High	Master Protein	Q9NY33	dipeptidyl peptidase 3 [OS=Homo sapiens]	0	FALSE	217.416	47	29	128	29	1	737	82.5	5.1	459.37	29	0	15310.6	14321	14726.1	14500	17160.5	16467.3		15310.6	15427.5	14233.4	14160.4	19467.5	19358	15369	14196.9	0.923736	19412.8	1.26311	0.453228	0.106092	FALSE
FALSE	High	Master Protein	P30740	Leukocyte elastase inhibitor [OS=Homo sapiens]	0	FALSE	217.341	55	23	161	22	1	379	42.7	6.28	578.93	23	0	18348.1	16876.9	24761.2	24136	15422.5	14740.5		18348.1	18180.8	23932.8	23570.8	17495.9	17328.1	18264.5	23751.8	1.30044	17412	0.953326	0.0311098	0.704588	FALSE
FALSE	High	Master Protein	P09104	Gamma-enolase [OS=Homo sapiens]	0	FALSE	217.333	61	18	289	13	1	434	47.2	5.03	1172.85	18	1	9812.4	8928.4	14571.7	14478.3	6562.5	6368.8		9812.4	9618.22	14084.2	14139.2	7444.76	7486.8	9715.31	14111.7	1.45252	7465.78	0.768455	0.00991499	0.159589	FALSE
FALSE	High	Master Protein	Q9NYF8-3	Isoform 3 of Bcl-2-associated transcription factor 1 [OS=Homo sapiens]	0	FALSE	216.835	31	29	98	1	1	869	100.2	9.95	351.36	29	0	403.9	385.5	411.7	400.7	371.1	361.6		403.9	415.284	397.926	391.316	420.99	425.076	409.592	394.621	0.963449	423.033	1.03282	0.811923	0.767586	FALSE
FALSE	High	Master Protein	Q9BT78	COP9 signalosome complex subunit 4 [OS=Homo sapiens]	0	FALSE	216.601	69	22	86	22	1	406	46.2	5.83	308.73	22	0	10665.3	9897.3	11011	10956.2	8627.5	8185		10665.3	10662	10642.6	10699.6	9787.38	9621.82	10663.6	10671.1	1.0007	9704.6	0.910064	0.937462	0.568069	FALSE
FALSE	High	Master Protein	Q53FZ2-1	Acyl-coenzyme A synthetase ACSM3, mitochondrial [OS=Homo sapiens]	0	FALSE	216.504	45	23	90	23	1	586	66.1	9.04	309.42	23	0	9850.5	9116.4	18127.6	17222.2	7608.3	7400.8		9850.5	9820.74	17521.1	16818.9	8631.16	8699.96	9835.62	17170	1.7457	8665.56	0.881038	2.17824e-05	0.421688	FALSE
FALSE	High	Master Protein	Q15637-5	Isoform 5 of Splicing factor 1 [OS=Homo sapiens]	0	FALSE	216.438	33	20	107	6	1	673	71.7	9.58	404.37	20	17	10913.1	9624.4	9848.2	9861	8823.1	8616.3		10913.1	10368	9518.71	9630.07	10009.3	10128.8	10640.5	9574.39	0.899803	10069.1	0.946291	0.373371	0.779016	TRUE
FALSE	High	Master Protein	Q96RS6	NudC domain-containing protein 1 [OS=Homo sapiens]	0	FALSE	216.428	50	22	73	22	1	583	66.7	5.11	289.55	22	0	8626.2	8011.2	8615.5	8501.1	6902	6641.7		8626.2	8630.16	8327.26	8302.02	7829.9	7807.6	8628.18	8314.64	0.963661	7818.75	0.906188	0.706586	0.665483	TRUE
FALSE	High	Master Protein	Q14141-1	Septin-6 [OS=Homo sapiens]	0	FALSE	216.337	49	21	87	11	1	434	49.7	6.67	351.46	21	13	9958.5	9433.4	13642.9	13334.6	8082.8	7657.9		9958.5	10162.2	13186.5	13022.3	9169.45	9002.19	10060.4	13104.4	1.30258	9085.82	0.90313	0.0843183	0.53101	FALSE
FALSE	High	Master Protein	P34931	Heat shock 70 kDa protein 1-like [OS=Homo sapiens]	0	FALSE	216.31	36	19	403	2	1	641	70.3	6.02	1400.12	19	0	342.5	312.8	418.3	446.3	310.2	292.1		342.5	336.967	404.305	435.848	351.903	343.376	339.734	420.077	1.23649	347.64	1.02327	0.271484	0.76096	TRUE
FALSE	High	Master Protein	P49959-3	Isoform 3 of Double-strand break repair protein MRE11 [OS=Homo sapiens]	0	FALSE	216.018	41	27	115	27	1	711	81	6.15	372.63	27	0	14525.3	13333.3	13910.8	13745.3	7466.9	7411.8		14525.3	14363.4	13445.4	13423.4	8470.75	8712.89	14444.4	13434.4	0.930078	8591.82	0.594821	0.492184	0.00195455	TRUE
FALSE	High	Master Protein	Q9UBE0-1	SUMO-activating enzyme subunit 1 [OS=Homo sapiens]	0	FALSE	215.935	74	26	133	26	1	346	38.4	5.3	458.09	26	0	17917.7	16323.4	17749.1	17620.7	14905.5	14349.5		17917.7	17584.6	17155.3	17208.1	16909.4	16868.5	17751.1	17181.7	0.967919	16888.9	0.951428	0.756759	0.694348	TRUE
FALSE	High	Master Protein	P09960-1	leukotriene A-4 hydrolase [OS=Homo sapiens]	0	FALSE	215.888	54	27	104	27	1	611	69.2	6.18	380.93	27	0	14378	13510.2	15249	14824.2	12532.2	12050.1		14378	14554	14738.8	14477	14217	14165.4	14466	14607.9	1.00981	14191.2	0.981004	0.950986	0.859089	FALSE
FALSE	High	Master Protein	Q92547	DNA topoisomerase 2-binding protein 1 [OS=Homo sapiens]	0	FALSE	215.693	29	33	87	33	1	1522	170.6	6.96	306.05	33	0	8924.6	8030.2	9410.7	9403.3	6673.7	6574.3		8924.6	8650.62	9095.85	9183.09	7570.91	7728.37	8787.61	9139.47	1.04004	7649.64	0.870503	0.860748	0.493511	FALSE
FALSE	High	Master Protein	Q9BPX3	Condensin complex subunit 3 [OS=Homo sapiens]	0	FALSE	215.561	31	29	98	29	1	1015	114.3	5.59	347.54	29	0	13053.2	11926.1	12552.4	12358	9623.5	9163.6		13053.2	12847.5	12132.4	12068.6	10917.3	10772.2	12950.4	12100.5	0.934377	10844.7	0.837408	0.519573	0.248863	TRUE
FALSE	High	Master Protein	Q86UK7-1	E3 ubiquitin-protein ligase ZNF598 [OS=Homo sapiens]	0	FALSE	215.494	41	27	86	27	1	904	98.6	8.4	350.09	27	0	8484.1	8021.4	6928.5	6870.5	4903.3	4824.5		8484.1	8641.14	6696.7	6709.6	5562.5	5671.41	8562.62	6703.15	0.782839	5616.95	0.655985	0.0803348	0.0263819	TRUE
FALSE	High	Master Protein	O94832	Unconventional myosin-Id [OS=Homo sapiens]	0	FALSE	215.35	32	30	80	30	1	1006	116.1	9.39	283.48	30	0	6903.5	6455.9	5675.2	5573.4	8044.8	7471.8		6903.5	6954.69	5485.33	5442.88	9126.34	8783.42	6929.1	5464.1	0.788574	8954.88	1.29236	0.101735	0.120465	FALSE
FALSE	High	Master Protein	P16435	NADPH--cytochrome P450 reductase [OS=Homo sapiens]	0	FALSE	215.311	44	24	117	24	1	677	76.6	5.58	407.25	24	0	9576.1	9030.3	10225.7	10100.4	10148.4	9783.4		9576.1	9727.99	9883.58	9863.87	11512.7	11500.8	9652.05	9873.72	1.02297	11506.8	1.19216	0.940858	0.241544	TRUE
FALSE	High	Master Protein	P08240-1	signal recognition particle receptor subunit alpha [OS=Homo sapiens]	0	FALSE	215.122	42	22	128	22	1	638	69.8	8.95	401.37	22	0	13603.3	12490.4	13224.1	13097.7	13140.9	12426.2		13603.3	13455.4	12781.7	12791	14907.6	14607.5	13529.4	12786.3	0.945079	14757.5	1.09078	0.591027	0.592324	FALSE
FALSE	High	Master Protein	Q08752	peptidyl-prolyl cis-trans isomerase D [OS=Homo sapiens]	0	FALSE	214.897	68	26	94	26	1	370	40.7	7.21	352.78	26	0	20236.9	18690.7	15684.7	15405.1	16586.9	15609.5		20236.9	20134.8	15159.9	15044.3	18816.8	18349.6	20185.8	15102.1	0.748155	18583.2	0.920608	0.0124272	0.536941	TRUE
FALSE	High	Master Protein	O75330-3	Isoform 3 of Hyaluronan mediated motility receptor [OS=Homo sapiens]	0	FALSE	214.824	40	30	91	30	1	725	84.2	5.9	302.98	30	0	13307.5	12174.4	16381.3	16231.9	8027.1	7783.2		13307.5	13115	15833.2	15851.8	9106.26	9149.49	13211.3	15842.5	1.19917	9127.87	0.690916	0.255049	0.0199649	FALSE
FALSE	High	Master Protein	P04843	Dolichyl-diphosphooligosaccharide--protein glycosyltransferase subunit 1 [OS=Homo sapiens]	0	FALSE	214.797	58	27	119	27	1	607	68.5	6.38	438.62	27	0	12822	11774.2	15006.5	14671.3	12930.3	12574.6		12822	12683.9	14504.4	14327.7	14668.6	14782	12752.9	14416.1	1.13041	14725.3	1.15466	0.454932	0.349268	TRUE
FALSE	High	Master Protein	P51003	Poly(A) polymerase alpha [OS=Homo sapiens]	0	FALSE	214.792	42	27	76	25	1	745	82.8	7.37	301.94	27	2	13748	12752.9	15711.1	15356.8	12782.2	12212.5		13748	13738.2	15185.5	14997.2	14500.6	14356.3	13743.1	15091.3	1.0981	14428.5	1.04987	0.573097	0.780269	TRUE
FALSE	High	Master Protein	O60216	Double-strand-break repair protein rad21 homolog [OS=Homo sapiens]	0	FALSE	214.736	45	26	74	26	1	631	71.6	4.65	303.43	26	0	7142.8	6620.1	7580.3	7559.3	5637.3	5609.7		7142.8	7131.58	7326.69	7382.27	6395.18	6594.44	7137.19	7354.48	1.03045	6494.81	0.909995	0.93724	0.685162	FALSE
FALSE	High	Master Protein	O43175	D-3-phosphoglycerate dehydrogenase [OS=Homo sapiens]	0	FALSE	214.609	55	26	110	26	1	533	56.6	6.71	387.39	26	0	16954.5	14646.6	11968.7	12357.4	11438.8	10964.4		16954.5	15778.2	11568.3	12068	12976.6	12889.1	16366.4	11818.1	0.7221	12932.9	0.790211	0.00579016	0.117064	TRUE
FALSE	High	Master Protein	O60645	exocyst complex component 3 [OS=Homo sapiens]	0	FALSE	214.464	43	30	91	30	1	756	86.8	6.11	316	30	0	10802.7	10191.7	11999.3	11832.3	9828.2	9302.9		10802.7	10979.1	11597.8	11555.2	11149.5	10936	10890.9	11576.5	1.06295	11042.7	1.01394	0.755593	0.870593	TRUE
FALSE	High	Master Protein	P34897-1	Serine hydroxymethyltransferase, mitochondrial [OS=Homo sapiens]	0	FALSE	214.289	61	24	124	23	1	504	56	8.53	452.29	24	2	16594.1	15601.1	13013.2	13223.2	10872.5	10888.6		16594.1	16806.5	12577.8	12913.5	12334.2	12800	16700.3	12745.7	0.763202	12567.1	0.752509	0.0187817	0.0654999	TRUE
FALSE	High	Master Protein	Q8IZL8	Proline-, glutamic acid- and leucine-rich protein 1 [OS=Homo sapiens]	0	FALSE	214.231	37	26	90	26	1	1130	119.6	4.34	320.89	26	0	8721.3	8003.4	9059.4	8898.2	7308.6	7247.8		8721.3	8621.75	8756.3	8689.82	8291.16	8520.1	8671.53	8723.06	1.00594	8405.63	0.969337	0.971051	0.923581	FALSE
FALSE	High	Master Protein	Q9H3P7	Golgi resident protein GCP60 [OS=Homo sapiens]	0	FALSE	213.971	45	17	123	17	1	528	60.6	5.06	415.05	17	0	8748.9	8254.9	10179.3	9755.6	9229.8	8701.3		8748.9	8892.68	9838.74	9527.14	10470.6	10228.8	8820.79	9682.94	1.09774	10349.7	1.17333	0.604785	0.337754	TRUE
FALSE	High	Master Protein	P07339	Cathepsin D [OS=Homo sapiens]	0	FALSE	213.894	53	17	122	17	1	412	44.5	6.54	427.15	17	0	12817.1	12196.9	15439.8	15408.6	17312.7	16879.4		12817.1	13139.2	14923.2	15047.8	19640.2	19842.5	12978.2	14985.5	1.15467	19741.3	1.52112	0.376077	0.00122177	TRUE
FALSE	High	Master Protein	P31323	cAMP-dependent protein kinase type II-beta regulatory subunit [OS=Homo sapiens]	0	FALSE	213.872	56	19	157	15	1	418	46.3	4.92	490.12	19	5	14747.6	13707.3	21374.9	20896.2	12250.9	11585.2		14747.6	14766.3	20659.8	20406.8	13897.9	13618.9	14757	20533.3	1.39143	13758.4	0.932332	0.00515195	0.594694	FALSE
FALSE	High	Master Protein	Q99598	Translin-associated protein X [OS=Homo sapiens]	0	FALSE	213.821	63	17	90	17	1	290	33.1	6.55	374.36	17	0	12875	12078.7	12143	11829.3	9407.5	8756.2		12875	13011.9	11736.7	11552.3	10672.2	10293.3	12943.5	11644.5	0.899644	10482.8	0.809889	0.372687	0.169554	TRUE
FALSE	High	Master Protein	P21127-2	Isoform SV1 of Cyclin-dependent kinase 11B [OS=Homo sapiens]	0	FALSE	213.808	36	32	131	4	1	782	91.3	5.5	376.82	32	27	13994.9	12800.1	13073.6	13073.8	11872.2	11493.1		13994.9	13789.1	12636.2	12767.6	13468.3	13510.6	13892	12701.9	0.914335	13489.5	0.971025	0.39882	0.802419	TRUE
FALSE	High	Master Protein	Q5JRX3-2	Isoform 2 of Presequence protease, mitochondrial [OS=Homo sapiens]	0	FALSE	213.747	34	28	99	28	1	1038	117.4	6.92	371.74	28	0	11860.4	11070.7	12195	12386.1	10614.5	10411.1		11860.4	11926	11787	12096	12041.5	12238.7	11893.2	11941.5	1.00406	12140.1	1.02076	0.977045	0.923177	TRUE
FALSE	High	Master Protein	P48739-3	Isoform 3 of Phosphatidylinositol transfer protein beta isoform [OS=Homo sapiens]	0	FALSE	213.715	78	26	133	21	1	273	31.7	6.65	432.9	26	5	19088.5	17701.7	20115.2	20066.2	17285.2	16393		19088.5	19069.4	19442.2	19596.3	19609	19270.7	19078.9	19519.2	1.02308	19439.8	1.01892	0.891101	0.932351	TRUE
FALSE	High	Master Protein	P50453	Serpin B9 [OS=Homo sapiens]	0	FALSE	213.664	75	25	145	24	1	376	42.4	5.86	446.53	25	1	22212.9	20588.8	34445.1	33723.2	21363.7	20215.6		22212.9	22179.5	33292.7	32933.5	24235.8	23764.3	22196.2	33113.1	1.49183	24000.1	1.08127	0.000455851	0.729966	TRUE
FALSE	High	Master Protein	Q9BTC0	Death-inducer obliterator 1 [OS=Homo sapiens]	0	FALSE	213.619	21	32	83	31	1	2240	243.7	7.88	295.14	32	1	8898.1	7999.6	9167.7	8984.7	6246.4	5972.1		8898.1	8617.66	8860.98	8774.29	7086.16	7020.46	8757.88	8817.64	1.00682	7053.31	0.805367	0.976698	0.252045	FALSE
FALSE	High	Master Protein	P48735	Isocitrate dehydrogenase [NADP], mitochondrial [OS=Homo sapiens]	0	FALSE	213.615	51	25	110	24	1	452	50.9	8.69	351.69	25	1	15866.9	15098.2	23525.6	23379.4	9580.4	9507.2		15866.9	16264.7	22738.5	22831.9	10868.4	11176.1	16065.8	22785.2	1.41824	11022.3	0.686069	0.00282232	0.0179888	FALSE
FALSE	High	Master Protein	P54920	alpha-soluble nsf attachment protein [OS=Homo sapiens]	0	FALSE	213.534	75	20	76	18	1	295	33.2	5.36	309.95	20	2	9862.9	9232	11444.9	11150.1	11831.3	11437		9862.9	9945.28	11062	10889	13421.9	13444.7	9904.09	10975.5	1.10818	13433.3	1.35634	0.562308	0.0277675	TRUE
FALSE	High	Master Protein	Q7L0Y3	Mitochondrial ribonuclease P protein 1 [OS=Homo sapiens]	0	FALSE	213.082	66	25	126	25	1	403	47.3	9.36	395.08	25	0	13037.9	12330.3	12206.3	12087.2	12201.7	12196.7		13037.9	13283	11797.9	11804.1	13842.1	14337.7	13160.4	11801	0.896706	14089.9	1.07063	0.308007	0.682452	FALSE
FALSE	High	Master Protein	P06737-1	Glycogen phosphorylase, liver form [OS=Homo sapiens]	0	FALSE	212.994	38	27	102	23	1	847	97.1	7.17	345.78	27	1	8631.6	8275.5	13626.1	13430.8	6633.6	6514.5		8631.6	8914.88	13170.2	13116.3	7525.42	7658.07	8773.24	13143.2	1.49811	7591.75	0.86533	0.0045401	0.470713	FALSE
FALSE	High	Master Protein	Q14562	ATP-dependent RNA helicase dhx8 [OS=Homo sapiens]	0	FALSE	212.956	28	31	87	28	1	1220	139.2	8.32	291.15	31	0	7189.7	6818.2	6722.6	6519	6367.2	6262.4		7189.7	7344.98	6497.69	6366.34	7223.2	7361.72	7267.34	6432.01	0.885057	7292.46	1.00346	0.328392	0.838987	FALSE
FALSE	High	Master Protein	P35637-1	RNA-binding protein FUS [OS=Homo sapiens]	0	FALSE	212.866	19	14	180	11	1	526	53.4	9.36	598.79	14	3	24036.9	21913.9	23918.7	23214.2	20033.3	19098.3		24036.9	23607	23118.5	22670.6	22726.6	22450.9	23821.9	22894.5	0.961068	22588.7	0.948231	0.731604	0.4199	TRUE
FALSE	High	Master Protein	Q99729-3	Isoform 3 of Heterogeneous nuclear ribonucleoprotein A/B [OS=Homo sapiens]	0	FALSE	212.652	49	16	189	15	1	285	30.6	7.91	610.9	16	0	26476.6	24517.1	27841.4	28607.8	25038.7	25092.3		26476.6	26411.3	26909.9	27937.9	28404.9	29497.1	26444	27423.9	1.03706	28951	1.09481	0.765501	0.665899	TRUE
FALSE	High	Master Protein	Q92734-1	Protein TFG [OS=Homo sapiens]	0	FALSE	212.546	44	14	99	14	1	400	43.4	5.1	436.24	14	0	8671.4	8351.5	10264.4	9913.8	9267.4	8843.9		8671.4	8996.75	9920.99	9681.64	10513.3	10396.4	8834.07	9801.31	1.10949	10454.8	1.18347	0.557072	0.312868	TRUE
FALSE	High	Master Protein	Q15648	Mediator of RNA polymerase II transcription subunit 1 [OS=Homo sapiens]	0	FALSE	212.383	22	28	75	28	1	1581	168.4	8.73	250.42	28	0	8365.7	7809	9010.6	8764.4	6957.7	6932		8365.7	8412.33	8709.14	8559.15	7893.09	8148.86	8389.02	8634.14	1.02922	8020.98	0.956128	0.911405	0.840096	FALSE
FALSE	High	Master Protein	P62136-2	Isoform 2 of Serine/threonine-protein phosphatase PP1-alpha catalytic subunit [OS=Homo sapiens]	0	FALSE	212.316	72	23	101	1	1	341	38.6	6.62	389.3	23	25	13193.7	12601.7	14350.2	14212.1	11713.8	11629.3		13193.7	13575.3	13870.1	13879.3	13288.6	13670.7	13384.5	13874.7	1.03662	13479.7	1.00711	0.830609	0.99134	TRUE
FALSE	High	Master Protein	Q99567	Nuclear pore complex protein Nup88 [OS=Homo sapiens]	0	FALSE	212.281	45	28	60	28	1	741	83.5	5.69	250.57	28	0	11815.9	10812.6	12050.5	11874.7	10051.6	9856.8		11815.9	11648	11647.3	11596.6	11402.9	11587.1	11731.9	11622	0.990626	11495	0.979804	0.873264	0.852228	TRUE
FALSE	High	Master Protein	Q14137	Ribosome biogenesis protein BOP1 [OS=Homo sapiens]	0	FALSE	212.185	51	27	96	27	1	746	83.6	6.19	335.24	27	0	12033.2	10896.9	9648.6	9602.6	9230.4	9112.6		12033.2	11738.8	9325.79	9377.72	10471.3	10712.3	11886	9351.76	0.786787	10591.8	0.891115	0.07196	0.469834	TRUE
FALSE	High	Master Protein	P17252	Protein kinase C alpha type [OS=Homo sapiens]	0	FALSE	212.174	43	24	103	13	1	672	76.7	7.05	399.27	24	0	4981.9	4585.2	6139.8	5913.7	6109.8	5818.9		4981.9	4939.46	5934.38	5775.21	6931.2	6840.37	4960.68	5854.8	1.18024	6885.78	1.38807	0.412092	0.0179871	TRUE
FALSE	High	Master Protein	Q9NYV4-1	Cyclin-dependent kinase 12 [OS=Homo sapiens]	0	FALSE	212.005	23	30	88	22	1	1490	164.1	9.44	285.07	30	9	9136.5	8557.2	9443.9	9330.1	7778.1	7671.7		9136.5	9218.34	9127.94	9111.6	8823.78	9018.41	9177.42	9119.77	0.993719	8921.1	0.97207	0.8929	0.940994	TRUE
FALSE	High	Master Protein	O75874	Isocitrate dehydrogenase [NADP] cytoplasmic [OS=Homo sapiens]	0	FALSE	211.637	56	21	122	20	1	414	46.6	7.01	401.15	21	0	15862.3	14433.8	17612.1	17517.4	7347.7	7047.3		15862.3	15549	17022.9	17107.2	8335.52	8284.4	15705.6	17065	1.08655	8309.96	0.529107	0.6186	0.000290484	FALSE
FALSE	High	Master Protein	P31943	Heterogeneous nuclear ribonucleoprotein H [OS=Homo sapiens]	0	FALSE	211.628	61	19	303	10	1	449	49.2	6.3	1306.65	19	9	33494.6	32990.8	35292.9	34203.5	32863.9	32679.7		33494.6	35539.7	34112.1	33402.5	37282.1	38416.4	34517.2	33757.3	0.977987	37849.2	1.09653	0.864404	0.657875	FALSE
FALSE	High	Master Protein	P09884	DNA polymerase alpha catalytic subunit [OS=Homo sapiens]	0	FALSE	211.56	24	33	71	33	1	1462	165.8	5.85	263.95	33	0	13473.9	12158.7	11575.8	11426.5	7985.9	7797.4		13473.9	13098.1	11188.5	11158.9	9059.52	9166.18	13286	11173.7	0.841014	9112.85	0.685899	0.172844	0.0179225	TRUE
FALSE	High	Master Protein	Q9H270	Vacuolar protein sorting-associated protein 11 homolog [OS=Homo sapiens]	0	FALSE	211.401	35	33	91	33	1	941	107.8	7.05	295.88	33	0	10162	9366.3	10906.2	10837.8	8914.5	8523.3		10162	10090	10541.3	10584	10113	10019.5	10126	10562.7	1.04312	10066.2	0.9941	0.846403	0.94908	FALSE
FALSE	High	Master Protein	P37837	Transaldolase [OS=Homo sapiens]	0	FALSE	211.308	55	26	312	26	1	337	37.5	6.81	847.65	26	0	31854.7	29217.5	40395.6	40177.6	28448	27350.9		31854.7	31474.9	39044.1	39236.7	32272.5	32152.2	31664.8	39140.4	1.23609	32212.3	1.01729	0.0887825	0.918518	TRUE
FALSE	High	Master Protein	P99999	cytochrome c [OS=Homo sapiens]	0	FALSE	211.083	73	16	274	12	1	105	11.7	9.57	987.33	16	4	28972.5	26204.8	34333.3	34862.5	35180.8	34117.4		28972.5	28229.4	33184.6	34046.1	39910.5	40106.5	28601	33615.4	1.17532	40008.5	1.39885	0.202897	0.0174433	TRUE
FALSE	High	Master Protein	A0MZ66-3	Isoform 3 of Shootin-1 [OS=Homo sapiens]	0	FALSE	211.06	45	27	76	27	1	649	73.6	5.45	269.41	27	0	10561.5	9699.7	12465.6	12253.2	9678.6	9087.5		10561.5	10449.1	12048.5	11966.3	10979.8	10682.7	10505.3	12007.4	1.14298	10831.3	1.03103	0.412954	0.803969	TRUE
FALSE	High	Master Protein	Q5VUA4	Zinc finger protein 318 [OS=Homo sapiens]	0	FALSE	210.924	18	33	65	33	1	2279	251	7.2	245.61	33	0	7137.5	6588.7	8565.4	8425.8	5429.6	5407.3		7137.5	7097.75	8278.83	8228.48	6159.55	6356.51	7117.63	8253.66	1.15961	6258.03	0.87923	0.471938	0.533278	FALSE
FALSE	High	Master Protein	Q14CX7-1	N-alpha-acetyltransferase 25, NatB auxiliary subunit [OS=Homo sapiens]	0	FALSE	210.911	33	31	107	31	1	972	112.2	6.64	349.1	31	0	12098.4	11017.2	11591	11491.1	11260.7	10567.7		12098.4	11868.4	11203.2	11222	12774.6	12422.8	11983.4	11212.6	0.935678	12598.7	1.05134	0.547463	0.773184	FALSE
FALSE	High	Master Protein	O94776	Metastasis-associated protein MTA2 [OS=Homo sapiens]	0	FALSE	210.839	51	27	132	23	1	668	75	9.66	462.52	27	3	13334.5	12726.6	12528	12522.9	12344.2	12196.9		13334.5	13709.9	12108.9	12229.6	14003.7	14338	13522.2	12169.2	0.899947	14170.9	1.04797	0.323586	0.789422	FALSE
FALSE	High	Master Protein	Q96A49	Synapse-associated protein 1 [OS=Homo sapiens]	0	FALSE	210.781	53	22	63	22	1	352	39.9	4.53	282.5	22	0	12098.5	10846.7	13455.7	13271.8	11239.2	10521		12098.5	11684.7	13005.5	12961	12750.2	12367.9	11891.6	12983.3	1.0918	12559	1.05613	0.597733	0.75034	TRUE
FALSE	High	Master Protein	Q96QK1	Vacuolar protein sorting-associated protein 35 [OS=Homo sapiens]	0	FALSE	210.775	38	31	92	31	1	796	91.6	5.49	308.37	31	0	12383.9	10830.4	12541.5	12592.5	10135.8	9623.2		12383.9	11667.2	12121.9	12297.6	11498.5	11312.5	12025.5	12209.8	1.01532	11405.5	0.948437	0.926072	0.678331	FALSE
FALSE	High	Master Protein	Q99497	protein DJ-1 [OS=Homo sapiens]	0	FALSE	210.374	94	19	159	19	1	189	19.9	6.79	613.59	19	0	22520	21178	25827.8	25922.9	19915.3	19296.9		22520	22814.2	24963.7	25315.8	22592.7	22684.3	22667.1	25139.8	1.10908	22638.5	0.998738	0.420116	0.770656	FALSE
FALSE	High	Master Protein	P10155-1	60 kDa SS-A/Ro ribonucleoprotein [OS=Homo sapiens]	0	FALSE	210.358	61	28	99	28	1	538	60.6	8.03	342.89	28	0	10376.3	9506.7	11883.6	11895.8	9754.4	9317.3		10376.3	10241.2	11486	11617.2	11065.8	10952.9	10308.7	11551.6	1.12056	11009.3	1.06796	0.513846	0.665317	TRUE
FALSE	High	Master Protein	Q9H4L5-2	Isoform 1b of Oxysterol-binding protein-related protein 3 [OS=Homo sapiens]	0	FALSE	210.117	37	26	75	1	1	856	97.6	6.48	292.5	26	0	157.8	162.1	173	165.5	154.4	152.8		157.8	174.624	167.212	161.624	175.157	179.623	166.212	164.418	0.989207	177.39	1.06725	0.935634	0.570181	FALSE
FALSE	High	Master Protein	O43172-1	U4/U6 small nuclear ribonucleoprotein Prp4 [OS=Homo sapiens]	0	FALSE	210.075	50	23	100	23	1	522	58.4	7.42	390.56	23	0	11984	10916.3	11272.6	11128.5	9594.6	9380.2		11984	11759.7	10895.5	10867.9	10884.5	11026.8	11871.9	10881.7	0.916594	10955.7	0.922826	0.450195	0.639334	TRUE
FALSE	High	Master Protein	O75152	Zinc finger CCCH domain-containing protein 11A [OS=Homo sapiens]	0	FALSE	209.824	41	32	93	32	1	810	89.1	8.37	328.2	32	0	13399	12084.5	13753.6	13824.6	10924.7	10525.8		13399	13018.2	13293.5	13500.9	12393.4	12373.5	13208.6	13397.2	1.01428	12383.5	0.937532	0.930784	0.621184	FALSE
FALSE	High	Master Protein	O60885-1	Bromodomain-containing protein 4 [OS=Homo sapiens]	0	FALSE	209.786	21	28	123	19	1	1362	152.1	9.19	402.33	28	11	15280.8	13902.5	13272.6	13274.1	11036.4	10751.2		15280.8	14976.6	12828.5	12963.2	12520.1	12638.5	15128.7	12895.9	0.852412	12579.3	0.831486	0.144065	0.205305	TRUE
FALSE	High	Master Protein	P25786-2	Isoform Long of Proteasome subunit alpha type-1 [OS=Homo sapiens]	0	FALSE	209.708	79	20	178	20	1	269	30.2	6.99	665.6	20	0	23029.5	20621.9	23411.5	23241.2	20084	19144.9		23029.5	22215.2	22628.2	22696.9	22784.1	22505.7	22622.3	22662.6	1.00178	22644.9	1.001	0.960537	0.78832	TRUE
FALSE	High	Master Protein	P55263-1	Adenosine kinase [OS=Homo sapiens]	0	FALSE	209.524	62	26	159	26	1	362	40.5	6.7	498.61	26	0	18421.9	17033.3	23402	23037.6	15923.7	15204.8		18421.9	18349.3	22619.1	22498.1	18064.5	17873.9	18385.6	22558.6	1.22697	17969.2	0.977351	0.101513	0.838239	FALSE
FALSE	High	Master Protein	Q8WU79-1	Stromal membrane-associated protein 2 [OS=Homo sapiens]	0	FALSE	209.492	42	17	60	16	1	429	46.8	8.87	269.89	17	1	9416.2	8944.8	7918.1	7996.6	9141.4	8900.2		9416.2	9635.89	7653.19	7809.33	10370.4	10462.6	9526.04	7731.26	0.811592	10416.5	1.09347	0.125582	0.575515	FALSE
FALSE	High	Master Protein	O15355	Protein phosphatase 1G [OS=Homo sapiens]	0	FALSE	209.413	47	24	82	24	1	546	59.2	4.36	301.04	24	0	14772.2	13198.7	13176.1	13014.3	13466.6	12756.2		14772.2	14218.4	12735.3	12709.5	15277	14995.5	14495.3	12722.4	0.87769	15136.3	1.04422	0.226697	0.807605	FALSE
FALSE	High	Master Protein	Q9UQ88-2	Isoform SV1 of Cyclin-dependent kinase 11A [OS=Homo sapiens]	0	FALSE	209.299	36	30	124	2	1	780	91	5.41	353.77	30	0	673.3	641.2	663.5	625.1	596.5	566.6		673.3	690.74	641.302	610.461	676.693	666.063	682.02	625.881	0.917688	671.378	0.984396	0.544068	0.977832	TRUE
FALSE	High	Master Protein	Q8NDV7-6	Isoform 6 of Trinucleotide repeat-containing gene 6A protein [OS=Homo sapiens]	0	FALSE	209.287	26	32	63	31	1	1913	205	7.06	241.47	32	1	4775.1	4462.7	7018.4	6938.3	5257.2	5073.6		4775.1	4807.49	6783.59	6775.82	5963.98	5964.23	4791.3	6779.7	1.415	5964.1	1.24478	0.0470362	0.118726	TRUE
FALSE	High	Master Protein	Q9UKF6	Cleavage and polyadenylation specificity factor subunit 3 [OS=Homo sapiens]	0	FALSE	209.283	37	23	87	23	1	684	77.4	5.6	285.67	23	0	10617.9	9882	9699.2	9575.3	8227.7	8059.2		10617.9	10645.5	9374.7	9351.06	9333.83	9473.93	10631.7	9362.88	0.880657	9403.88	0.884514	0.296393	0.437959	TRUE
FALSE	High	Master Protein	Q96BP3	Peptidylprolyl isomerase domain and WD repeat-containing protein 1 [OS=Homo sapiens]	0	FALSE	209.248	47	29	70	29	1	646	73.5	7.15	277.11	29	0	10952.5	9950.4	10153.5	10375.1	8031.7	7872.9		10952.5	10719.2	9813.8	10132.1	9111.48	9254.93	10835.8	9972.97	0.920368	9183.2	0.847484	0.468619	0.283553	TRUE
FALSE	High	Master Protein	Q9UMX0-1	Ubiquilin-1 [OS=Homo sapiens]	0	FALSE	209.199	33	13	109	1	1	589	62.5	5.11	415.28	13	15	7138.6	6969.3	7644	7570.7	7186.4	6978.5		7138.6	7507.76	7388.26	7393.41	8152.54	8203.53	7323.18	7390.83	1.00924	8178.03	1.11673	0.967913	0.498999	TRUE
FALSE	High	Master Protein	P04181-1	Ornithine aminotransferase, mitochondrial [OS=Homo sapiens]	0	FALSE	209.012	68	27	105	27	1	439	48.5	7.03	384.36	27	0	13155	12139.7	11831.6	11972.8	11667.8	11854.3		13155	13077.6	11435.8	11692.4	13236.4	13935.2	13116.3	11564.1	0.881657	13585.8	1.0358	0.300128	0.848744	FALSE
FALSE	High	Master Protein	Q00325-2	Isoform B of Phosphate carrier protein, mitochondrial [OS=Homo sapiens]	0	FALSE	208.979	58	20	222	20	1	361	39.9	9.36	599.56	20	0	25463.8	24926.6	29862.5	30685.7	27171.9	27684.6		25463.8	26852.5	28863.4	29967.1	30824.9	32544.4	26158.1	29415.2	1.12452	31684.7	1.21127	0.360167	0.239191	TRUE
FALSE	High	Master Protein	Q15008-4	Isoform 4 of 26S proteasome non-ATPase regulatory subunit 6 [OS=Homo sapiens]	0	FALSE	208.962	52	29	142	2	1	442	51.9	6.74	417.81	29	28	13111.4	12228.7	13368.7	13147.9	11960	11286.9		13111.4	13173.5	12921.4	12840	13567.9	13268.2	13142.5	12880.7	0.980084	13418.1	1.02097	0.850478	0.922117	FALSE
FALSE	High	Master Protein	Q7Z4S6-4	Isoform 4 of Kinesin-like protein KIF21A [OS=Homo sapiens]	0	FALSE	208.865	23	30	57	25	1	1675	187.2	6.42	220.56	30	5	5757.7	5182.3	6097.9	5998.2	5602.6	5175.6		5757.7	5582.69	5893.89	5857.73	6355.81	6084.14	5670.2	5875.81	1.03626	6219.98	1.09696	0.949122	0.466029	TRUE
FALSE	High	Master Protein	P05387	60S acidic ribosomal protein P2 [OS=Homo sapiens]	0	FALSE	208.794	96	11	106	10	1	115	11.7	4.54	526.68	11	2	16958.6	16349.1	16640.4	16256.4	16503.7	15743.6		16958.6	17612.3	16083.7	15875.7	18722.4	18507.3	17285.4	15979.7	0.92446	18614.9	1.07691	0.457586	0.653781	FALSE
FALSE	High	Master Protein	P62826	GTP-binding nuclear protein RAN [OS=Homo sapiens]	0	FALSE	208.638	61	16	378	16	1	216	24.4	7.49	1402.57	16	0	37834.1	39048.5	40610.2	40505.9	34627.2	34324		37834.1	42065.4	39251.5	39557.3	39282.5	40349.3	39949.8	39404.4	0.986349	39815.9	0.996649	0.931749	0.754415	TRUE
FALSE	High	Master Protein	Q08945	FACT complex subunit SSRP1 [OS=Homo sapiens]	0	FALSE	208.518	37	27	125	27	1	709	81	6.87	400.18	27	0	19999.5	18463.6	19959.4	19953.1	14960.1	14591.7		19999.5	19890.1	19291.6	19485.8	16971.3	17153.2	19944.8	19388.7	0.972119	17062.2	0.855473	0.788786	0.274891	TRUE
FALSE	High	Master Protein	P11216	Glycogen phosphorylase, brain form [OS=Homo sapiens]	0	FALSE	208.342	38	29	114	23	1	843	96.6	6.86	377.97	29	7	8279.1	7687.9	11820.2	11680.2	6442.8	6062.2		8279.1	8281.88	11424.7	11406.7	7308.97	7126.38	8280.49	11415.7	1.37863	7217.67	0.871648	0.0290394	0.498637	FALSE
FALSE	High	Master Protein	Q9H6S0	Probable ATP-dependent RNA helicase YTHDC2 [OS=Homo sapiens]	0	FALSE	208.127	30	39	88	39	1	1430	160.1	8.4	296.04	39	0	12239.2	11331.5	11023	10833.2	7881.8	7441.9		12239.2	12207	10654.2	10579.5	8941.42	8748.27	12223.1	10616.9	0.86859	8844.85	0.723618	0.253754	0.038927	TRUE
FALSE	High	Master Protein	O75746	Calcium-binding mitochondrial carrier protein Aralar1 [OS=Homo sapiens]	0	FALSE	207.979	40	27	98	18	1	678	74.7	8.38	360.91	27	0	6104.8	6101.4	8140.8	8317.1	5262.3	5240.3		6104.8	6572.8	7868.44	8122.33	5969.76	6160.2	6338.8	7995.38	1.26134	6064.98	0.956802	0.221	0.940697	FALSE
FALSE	High	Master Protein	P62081	40S ribosomal protein S7 [OS=Homo sapiens]	0	FALSE	207.936	68	15	170	15	1	194	22.1	10.1	591.43	15	0	14564.4	13828	14087.9	14582.7	12599.2	12599.6		14564.4	14896.4	13616.6	14241.2	14293	14811.4	14730.4	13928.9	0.945589	14552.2	0.987904	0.594536	0.898717	TRUE
FALSE	High	Master Protein	O60502	protein O-GlcNAcase [OS=Homo sapiens]	0	FALSE	207.905	48	32	78	32	1	916	102.8	4.91	282.3	32	0	9839.3	9541.5	13527.7	13055	12367	11618.3		9839.3	10278.7	13075.1	12749.3	14029.6	13657.8	10059	12912.2	1.28365	13843.7	1.37625	0.105549	0.0200495	TRUE
FALSE	High	Master Protein	Q13619-1	cullin-4A [OS=Homo sapiens]	0	FALSE	207.552	43	40	120	23	1	759	87.6	8.13	351.03	40	0	7606.3	6905.7	6802.5	6787.5	5785.7	5477.3		7606.3	7439.24	6574.91	6628.55	6563.53	6438.8	7522.77	6601.73	0.877566	6501.16	0.864198	0.301189	0.465802	TRUE
FALSE	High	Master Protein	Q92793-1	CREB-binding protein [OS=Homo sapiens]	0	FALSE	207.539	17	33	79	18	1	2442	265.2	8.53	249.64	33	16	7960.7	7120.8	7125.4	7126.1	6632.6	6405.7		7960.7	7670.96	6887.01	6959.22	7524.28	7530.17	7815.83	6923.11	0.885781	7527.23	0.963075	0.331103	0.976041	TRUE
FALSE	High	Master Protein	P29692-2	Isoform 2 of Elongation factor 1-delta [OS=Homo sapiens]	0	FALSE	207.357	38	26	159	24	1	647	71.4	6.42	513.44	26	2	14392.7	13026.7	12432.3	12422.8	14072	13180.3		14392.7	14033.2	12016.4	12131.9	15963.8	15494	14212.9	12074.1	0.849517	15728.9	1.10666	0.136311	0.525387	FALSE
FALSE	High	Master Protein	Q15691	Microtubule-associated protein RP/EB family member 1 [OS=Homo sapiens]	0	FALSE	207.333	81	21	156	18	1	268	30	5.14	593.39	21	3	18630.8	17272.6	20977.9	20731.9	16270.4	15763.5		18630.8	18607.1	20276.1	20246.4	18457.8	18530.7	18619	20261.2	1.0882	18494.2	0.993301	0.509917	0.929903	FALSE
FALSE	High	Master Protein	Q99661-1	Kinesin-like protein KIF2C [OS=Homo sapiens]	0	FALSE	207.323	45	27	96	26	1	725	81.3	7.83	400.91	27	1	13875.9	13090	12015.9	11949	10211.6	9773.3		13875.9	14101.4	11613.9	11669.2	11584.4	11488.9	13988.6	11641.5	0.832214	11536.7	0.824719	0.151596	0.188218	TRUE
FALSE	High	Master Protein	Q9BS26	Endoplasmic reticulum resident protein 44 [OS=Homo sapiens]	0	FALSE	207.226	55	21	118	20	1	406	46.9	5.26	392.18	21	0	12378.9	11575.9	14708.9	14392.3	13604.8	13035.9		12378.9	12470.3	14216.8	14055.3	15433.8	15324.3	12424.6	14136	1.13775	15379	1.23779	0.430157	0.145046	TRUE
FALSE	High	Master Protein	O00629	Importin subunit alpha-3 [OS=Homo sapiens]	0	FALSE	207.156	49	19	120	12	1	521	57.9	4.96	471.82	19	7	9136.3	8478.4	9558.4	9354.5	7832.3	7544.2		9136.3	9133.45	9238.61	9135.43	8885.27	8868.53	9134.88	9187.02	1.00571	8876.9	0.971759	0.969545	0.93901	FALSE
FALSE	High	Master Protein	Q16543	Hsp90 co-chaperone Cdc37 [OS=Homo sapiens]	0	FALSE	207.047	43	21	146	21	1	378	44.4	5.25	482.94	21	0	18253.4	16601.8	16736.9	16662.6	18301.7	17341.5		18253.4	17884.5	16176.9	16272.4	20762.2	20385.7	18068.9	16224.7	0.897931	20573.9	1.13863	0.31384	0.476322	FALSE
FALSE	High	Master Protein	P18754-2	Isoform 2 of Regulator of chromosome condensation [OS=Homo sapiens]	0	FALSE	206.945	52	18	131	18	1	452	48.1	8.16	570.93	18	0	17562	16161.7	17615.2	17188.8	15815.1	15519.7		17562	17410.4	17025.9	16786.3	17941.3	18244.1	17486.2	16906.1	0.966824	18092.7	1.03468	0.748471	0.854212	FALSE
FALSE	High	Master Protein	Q9BW27	nuclear pore complex protein Nup85 [OS=Homo sapiens]	0	FALSE	206.916	35	22	78	22	1	656	75	5.55	274.77	22	0	7692.7	7087.9	7537	7257.9	7145.6	6882.5		7692.7	7635.52	7284.84	7087.93	8106.25	8090.67	7664.11	7186.39	0.937667	8098.46	1.05667	0.561688	0.706738	FALSE
FALSE	High	Master Protein	P30566	adenylosuccinate lyase [OS=Homo sapiens]	0	FALSE	206.901	43	18	80	18	1	484	54.9	7.11	304.35	18	0	9792	9064.2	9342.2	9216.7	8517.9	7990		9792	9764.51	9029.64	9000.86	9663.04	9392.59	9778.26	9015.25	0.921969	9527.81	0.974388	0.476558	0.95578	TRUE
FALSE	High	Master Protein	O00178	GTP-binding protein 1 [OS=Homo sapiens]	0	FALSE	206.763	36	23	74	23	1	669	72.4	8.34	269.33	23	0	6632.8	6043.8	8959.8	8642.8	7133.7	6658.2		6632.8	6510.75	8660.04	8440.4	8092.75	7827	6571.78	8550.22	1.30105	7959.88	1.21122	0.0848895	0.251063	TRUE
FALSE	High	Master Protein	Q8TDY2-1	RB1-inducible coiled-coil protein 1 [OS=Homo sapiens]	0	FALSE	206.667	27	39	77	38	1	1594	183	5.41	257.91	39	0	8502.7	7947.8	11409.6	11110.5	10084.9	9576.9		8502.7	8561.86	11027.9	10850.3	11440.7	11258.1	8532.28	10939.1	1.28208	11349.4	1.33017	0.107282	0.0815809	TRUE
FALSE	High	Master Protein	P41214	Eukaryotic translation initiation factor 2d [OS=Homo sapiens]	0	FALSE	206.483	45	20	82	20	1	584	64.7	7.65	340.02	20	0	7562.6	7183.2	7024	6802.1	7350.9	7004		7562.6	7738.18	6789	6642.81	8339.15	8233.5	7650.39	6715.9	0.877851	8286.33	1.08312	0.302195	0.611251	FALSE
FALSE	High	Master Protein	P22681	E3 ubiquitin-protein ligase CBL [OS=Homo sapiens]	0	FALSE	206.45	36	21	79	20	1	906	99.6	6.54	314.86	21	1	7892.2	7215.9	8722	8724.6	5580.6	5254.2		7892.2	7773.41	8430.19	8520.28	6330.85	6176.54	7832.8	8475.24	1.08202	6253.7	0.798398	0.671336	0.232209	FALSE
FALSE	High	Master Protein	P68032	Actin, alpha cardiac muscle 1 [OS=Homo sapiens]	0	FALSE	206.445	52	21	1521	1	1	377	42	5.39	4097.24	21	2	10731.2	11136.5	12758.2	12645.6	10674.8	10541		10731.2	11996.9	12331.4	12349.5	12109.9	12391.4	11364.1	12340.4	1.08592	12250.7	1.07802	0.62116	0.648782	TRUE
FALSE	High	Master Protein	Q06124	tyrosine-protein phosphatase non-receptor type 11 [OS=Homo sapiens]	0	FALSE	206.411	48	27	84	26	1	597	68.4	7.3	275.97	27	1	8553.5	7765.5	9791	9923.6	7128.5	6786		8553.5	8365.47	9463.43	9691.21	8086.85	7977.23	8459.49	9577.32	1.13214	8032.04	0.949472	0.470608	0.798637	FALSE
FALSE	High	Master Protein	Q9Y262	eukaryotic translation initiation factor 3 subunit L [OS=Homo sapiens]	0	FALSE	206.373	43	25	116	25	1	564	66.7	6.34	411.86	25	0	15802.4	14450.2	15558	15014.2	17633.3	16658.3		15802.4	15566.6	15037.5	14662.6	20003.9	19582.5	15684.5	14850	0.946796	19793.2	1.26196	0.602894	0.107662	FALSE
FALSE	High	Master Protein	P17480-1	Nucleolar transcription factor 1 [OS=Homo sapiens]	0	FALSE	206.293	42	34	82	2	1	764	89.4	5.81	262.78	34	33	12028.1	10712.2	12011.3	12087.4	9763.6	9728.1		12028.1	11539.8	11609.4	11804.3	11076.2	11435.8	11784	11706.9	0.993459	11256	0.955196	0.891249	0.834263	TRUE
FALSE	High	Master Protein	P57678	Gem-associated protein 4 [OS=Homo sapiens]	0	FALSE	206.276	34	31	95	31	1	1058	120	6.04	313.54	31	0	9429	8891.3	8408.9	8054.9	7958.2	7801.7		9429	9578.25	8127.57	7866.27	9028.1	9171.23	9503.63	7996.92	0.84146	9099.66	0.957494	0.191429	0.848661	TRUE
FALSE	High	Master Protein	P52895	Aldo-keto reductase family 1 member C2 [OS=Homo sapiens]	0	FALSE	206.166	66	19	154	4	1	323	36.7	7.49	589.09	19	0	1784.8	1577.4	1243.6	1331.7	1643.3	1590.9		1784.8	1699.27	1201.99	1300.51	1864.22	1870.17	1742.04	1251.25	0.718271	1867.2	1.07185	0.0997517	0.506921	FALSE
FALSE	High	Master Protein	Q9GZR7	ATP-dependent RNA helicase DDX24 [OS=Homo sapiens]	0	FALSE	206.042	42	28	65	28	1	859	96.3	9.06	250.58	28	0	5579.7	5227.1	5651.1	5507.5	4499.9	4348.3		5579.7	5630.95	5462.03	5378.52	5104.86	5111.61	5605.33	5420.28	0.966987	5108.24	0.911319	0.691425	0.646718	TRUE
FALSE	High	Master Protein	Q7Z3B4	Nucleoporin p54 [OS=Homo sapiens]	0	FALSE	205.975	47	22	93	22	1	507	55.4	7.02	352.54	22	0	8317.9	7802	8985.4	8907.9	7763.9	7556.5		8317.9	8404.79	8684.78	8699.29	8807.67	8882.99	8361.35	8692.04	1.03955	8845.33	1.05788	0.863034	0.702252	TRUE
FALSE	High	Master Protein	Q8N766-1	ER membrane protein complex subunit 1 [OS=Homo sapiens]	0	FALSE	205.831	29	24	74	24	1	993	111.7	7.66	257.62	24	0	7376.4	6634.9	8173.7	8145.9	7810.8	7219.4		7376.4	7147.52	7900.24	7955.14	8860.88	8486.71	7261.96	7927.69	1.09167	8673.8	1.19442	0.702163	0.287386	TRUE
FALSE	High	Master Protein	P11387	DNA topoisomerase 1 [OS=Homo sapiens]	0	FALSE	205.315	34	27	165	24	1	765	90.7	9.31	514.11	27	4	20374.6	18734.6	20028.9	19257.5	16026.9	15498.1		20374.6	20182.1	19358.8	18806.5	18181.5	18218.7	20278.3	19082.7	0.941037	18200.1	0.897515	0.563514	0.432077	TRUE
FALSE	High	Master Protein	Q14191	Werner syndrome ATP-dependent helicase [OS=Homo sapiens]	0	FALSE	205.289	24	31	92	31	1	1432	162.4	6.34	289.06	31	0	9672	8683.5	9897	9885.5	5437.4	5379.5		9672	9354.4	9565.88	9654	6168.4	6323.83	9513.2	9609.94	1.01017	6246.12	0.656574	0.99817	0.0279691	FALSE
FALSE	High	Master Protein	Q13131-2	Isoform 2 of 5'-AMP-activated protein kinase catalytic subunit alpha-1 [OS=Homo sapiens]	0	FALSE	205.122	41	23	81	23	1	574	65.5	8.22	258.59	23	0	9024.8	8339.7	13400.6	13274.9	6914.3	6634.9		9024.8	8984.04	12952.3	12964	7843.85	7799.61	9004.42	12958.1	1.43909	7821.73	0.868655	0.0123361	0.4853	FALSE
FALSE	High	Master Protein	P62906	60S ribosomal protein L10A [OS=Homo sapiens]	0	FALSE	204.818	54	15	326	15	1	217	24.8	9.94	1003.98	15	0	33527.3	31309.3	33415	33489.6	31231.4	30202.7		33527.3	33728.3	32297.1	32705.3	35430.1	35504.6	33627.8	32501.2	0.966498	35467.4	1.0547	0.77356	0.860929	FALSE
FALSE	High	Master Protein	O95433	activator of 90 kDa heat shock protein ATPase homolog 1 [OS=Homo sapiens]	0	FALSE	204.662	60	18	115	18	1	338	38.3	5.53	403.54	18	0	15064.4	14179.6	14106.1	13875.7	15154.9	14464.8		15064.4	15275.1	13634.2	13550.8	17192.3	17004	15169.8	13592.5	0.896023	17098.2	1.12712	0.304789	0.445263	FALSE
FALSE	High	Master Protein	Q9ULC4-1	Malignant T-cell-amplified sequence 1 [OS=Homo sapiens]	0	FALSE	204.488	68	12	142	12	1	181	20.5	8.82	497.85	12	0	14897.3	13675.7	15941.9	15897.3	14324.7	13434.3		14897.3	14732.3	15408.5	15525	16250.5	15792.6	14814.8	15466.8	1.04401	16021.6	1.08146	0.798014	0.633353	TRUE
FALSE	High	Master Protein	O14818-1	Proteasome subunit alpha type-7 [OS=Homo sapiens]	0	FALSE	204.263	67	18	161	18	1	248	27.9	8.46	596.24	18	0	16498.5	15317.6	17768.4	17522.8	15689	15056.3		16498.5	16501.1	17173.9	17112.4	17798.2	17699.3	16499.8	17143.2	1.039	17748.8	1.0757	0.820103	0.659279	TRUE
FALSE	High	Master Protein	P35612-1	Beta-adducin [OS=Homo sapiens]	0	FALSE	204.039	37	23	79	22	1	726	80.8	5.92	291.07	23	1	10299.4	9625	12041.6	11751	8215.1	7823.5		10299.4	10368.6	11638.7	11475.8	9319.53	9196.86	10334	11557.3	1.11837	9258.2	0.895895	0.522265	0.493697	FALSE
FALSE	High	Master Protein	Q9NXG2	THUMP domain-containing protein 1 [OS=Homo sapiens]	0	FALSE	204.025	55	22	137	22	1	353	39.3	7.88	479.55	22	0	14114.2	12668.9	16267	16274.6	10524.4	10164.9		14114.2	13647.7	15722.8	15893.5	11939.3	11949.3	13881	15808.1	1.13883	11944.3	0.86048	0.426548	0.291243	FALSE
FALSE	High	Master Protein	O95817	BAG family molecular chaperone regulator 3 [OS=Homo sapiens]	0	FALSE	203.661	61	23	72	23	1	575	61.6	6.95	286.34	23	0	5601.7	5041	5669.6	5761.6	4739.8	4485.5		5601.7	5430.47	5479.91	5626.67	5377.02	5272.9	5516.09	5553.29	1.00675	5324.96	0.96535	0.903935	0.931928	FALSE
FALSE	High	Master Protein	P17480-2	Isoform UBF2 of Nucleolar transcription factor 1 [OS=Homo sapiens]	0	FALSE	203.624	43	33	81	1	1	727	84.9	5.55	260.49	33	0	204.4	183.4	210.9	215.3	136.1	156.1		204.4	197.57	203.844	210.258	154.397	183.502	200.985	207.051	1.03018	168.95	0.840609	0.924975	0.616212	FALSE
FALSE	High	Master Protein	P52789	Hexokinase-2 [OS=Homo sapiens]	0	FALSE	203.566	34	31	112	27	1	917	102.3	6.05	326.74	31	0	9776.7	9368.4	8776.6	8621.1	8170.3	7971		9776.7	10092.2	8482.97	8419.21	9268.71	9370.25	9934.46	8451.09	0.850684	9319.48	0.938097	0.198678	0.729144	TRUE
FALSE	High	Master Protein	Q92879	CUGBP Elav-like family member 1 [OS=Homo sapiens]	0	FALSE	203.492	31	15	192	12	1	486	52	8.46	528.25	15	2	14025.2	12322.9	14109.8	14245.1	13990.7	13550.7		14025.2	13275	13637.7	13911.5	15871.6	15929.4	13650.1	13774.6	1.00912	15900.5	1.16487	0.954103	0.317311	TRUE
FALSE	High	Master Protein	Q14692	ribosome biogenesis protein BMS1 homolog [OS=Homo sapiens]	0	FALSE	203.479	26	26	90	26	1	1282	145.7	6.44	292.74	26	0	10133.6	9531.7	7835.1	7827	5553	5926.7		10133.6	10268.1	7572.96	7643.7	6299.54	6967.09	10200.9	7608.33	0.745852	6633.32	0.65027	0.042574	0.0249418	TRUE
FALSE	High	Master Protein	Q2TAY7	WD40 repeat-containing protein SMU1 [OS=Homo sapiens]	0	FALSE	203.463	49	20	165	20	1	513	57.5	7.18	556.42	20	0	12506	11855.8	13204.2	12730.7	10032.2	9870.5		12506	12771.8	12762.4	12432.6	11380.9	11603.2	12638.9	12597.5	0.996725	11492.1	0.909261	0.981904	0.483871	TRUE
FALSE	High	Master Protein	Q8IYB8	ATP-dependent RNA helicase SUPV3L1, mitochondrial [OS=Homo sapiens]	0	FALSE	203.403	40	27	108	27	1	786	87.9	7.99	398.73	27	0	10007.2	9683.5	9599.6	9306.3	9182.8	9183.6		10007.2	10431.7	9278.43	9088.36	10417.3	10795.7	10219.4	9183.4	0.898621	10606.5	1.03788	0.36829	0.777629	FALSE
FALSE	High	Master Protein	Q14240-2	Isoform 2 of Eukaryotic initiation factor 4A-II [OS=Homo sapiens]	0	FALSE	203.379	67	26	241	8	1	408	46.5	5.48	811.63	26	0	7542.2	6813.3	2509.7	2506.2	1620.3	1629.7		7542.2	7339.7	2425.73	2447.51	1838.13	1915.78	7440.95	2436.62	0.327461	1876.96	0.252247	5.75908e-05	4.87026e-06	TRUE
FALSE	High	Master Protein	P68133	Actin, alpha skeletal muscle [OS=Homo sapiens]	0	FALSE	203.304	52	21	1521	1	1	377	42	5.39	4096.12	21	0	47.9	37.5	55.5	58.7	47	42.8		47.9	40.3973	53.6432	57.3253	53.3187	50.3132	44.1486	55.4843	1.25676	51.8159	1.17367	0.373778	0.351554	TRUE
FALSE	High	Master Protein	P62140	Serine/threonine-protein phosphatase PP1-beta catalytic subunit [OS=Homo sapiens]	0	FALSE	203.278	66	21	112	7	1	327	37.2	6.19	387.18	21	0	4125.5	3928.7	4228.4	4054.7	3712.8	3631.9		4125.5	4232.24	4086.93	3959.75	4211.95	4269.45	4178.87	4023.34	0.962782	4240.7	1.0148	0.780007	0.779442	FALSE
FALSE	High	Master Protein	Q7Z3K3-1	Pogo transposable element with ZNF domain [OS=Homo sapiens]	0	FALSE	203.049	27	27	90	26	1	1410	155.2	7.4	309.91	27	1	6578.3	6085.6	8516.6	8325.3	5328.8	5302.2		6578.3	6555.78	8231.66	8130.34	6045.2	6232.96	6567.04	8181	1.24577	6139.08	0.934832	0.251532	0.818268	FALSE
FALSE	High	Master Protein	P62829	60S ribosomal protein L23 [OS=Homo sapiens]	0	FALSE	202.993	71	15	294	15	1	140	14.9	10.51	886.67	15	0	30939.7	29248.1	29905.8	30010.4	29338.5	28554.2		30939.7	31507.8	28905.3	29307.6	33282.8	33566.7	31223.8	29106.4	0.932188	33424.7	1.07049	0.524143	0.782395	FALSE
FALSE	High	Master Protein	Q9Y696	Chloride intracellular channel protein 4 [OS=Homo sapiens]	0	FALSE	202.928	61	15	140	14	1	253	28.8	5.59	467.65	15	0	9186.3	8587.1	11865.6	11800	9078.7	8663.5		9186.3	9250.55	11468.6	11523.7	10299.2	10184.3	9218.43	11496.1	1.24708	10241.8	1.11101	0.160614	0.517305	TRUE
FALSE	High	Master Protein	P52907	F-actin-capping protein subunit alpha-1 [OS=Homo sapiens]	0	FALSE	202.872	70	14	206	11	1	286	32.9	5.69	873.77	14	0	14505.6	13701.5	15103.3	14503.7	14513	13747.3		14505.6	14760.1	14598	14164	16464.1	16160.5	14632.8	14381	0.98279	16312.3	1.11477	0.871666	0.492759	FALSE
FALSE	High	Master Protein	P18031	Tyrosine-protein phosphatase non-receptor type 1 [OS=Homo sapiens]	0	FALSE	202.679	54	23	98	23	1	435	49.9	6.27	335.94	23	0	11616.9	11007.5	10455.3	10243.7	14689.1	14228.9		11616.9	11858	10105.5	10003.8	16663.9	16726.7	11737.4	10054.7	0.856632	16695.3	1.4224	0.215909	0.00892905	FALSE
FALSE	High	Master Protein	P06132	Uroporphyrinogen decarboxylase [OS=Homo sapiens]	0	FALSE	202.669	56	14	113	14	1	367	40.8	6.14	496.6	14	0	10929.3	10639.7	13563.5	13179.1	11231.2	11024.4		10929.3	11461.7	13109.7	12870.5	12741.1	12959.7	11195.5	12990.1	1.16029	12850.4	1.14782	0.359074	0.371807	TRUE
FALSE	High	Master Protein	O60684	Importin subunit alpha-7 [OS=Homo sapiens]	0	FALSE	202.506	47	26	97	10	1	536	60	4.98	352.1	26	18	9414.6	8722	10478.3	10095.5	10527.6	9980.9		9414.6	9395.87	10127.7	9859.08	11942.9	11733	9405.24	9993.41	1.06254	11838	1.25866	0.75747	0.112269	TRUE
FALSE	High	Master Protein	O43432-3	Isoform 3 of Eukaryotic translation initiation factor 4 gamma 3 [OS=Homo sapiens]	0	FALSE	202.089	23	38	122	29	1	1591	177.2	5.39	356.61	38	1	6991.5	6199.6	9529.3	9663.1	5160.6	4931.6		6991.5	6678.59	9210.48	9436.81	5854.39	5797.31	6835.04	9323.64	1.36409	5825.85	0.85235	0.0360126	0.386869	FALSE
FALSE	High	Master Protein	Q06323-1	Proteasome activator complex subunit 1 [OS=Homo sapiens]	0	FALSE	201.818	71	20	112	20	1	249	28.7	6.02	395.96	20	0	14044.8	12879.1	21991.3	21070.2	10935.3	10488.7		14044.8	13874.2	21255.5	20576.8	12405.4	12329.9	13959.5	20916.2	1.49835	12367.7	0.88597	0.000383222	0.384444	FALSE
FALSE	High	Master Protein	Q6PJT7-1	Zinc finger CCCH domain-containing protein 14 [OS=Homo sapiens]	0	FALSE	201.782	46	31	75	2	1	736	82.8	7.31	231.98	31	29	8266.7	7252.1	7854.6	7933.8	6424.2	6239		8266.7	7812.41	7591.81	7748	7287.87	7334.21	8039.55	7669.91	0.954022	7311.04	0.909384	0.647731	0.681985	TRUE
FALSE	High	Master Protein	Q9UI26-2	Isoform 2 of Importin-11 [OS=Homo sapiens]	0	FALSE	201.743	23	23	71	23	1	1015	116.9	5.41	265.96	23	0	9224.4	8462	8367.2	8261.3	7538.3	7130		9224.4	9115.78	8087.26	8067.83	8551.74	8381.62	9170.09	8077.55	0.880858	8466.68	0.923293	0.312953	0.64201	TRUE
FALSE	High	Master Protein	P98175-1	RNA-binding protein 10 [OS=Homo sapiens]	0	FALSE	201.588	41	30	88	28	1	930	103.5	5.97	335.72	30	1	8479.9	7878.6	9307	9158.6	7087	6910.7		8479.9	8487.31	8995.62	8944.12	8039.77	8123.82	8483.61	8969.87	1.05732	8081.8	0.952637	0.781116	0.818289	FALSE
FALSE	High	Master Protein	P35221	Catenin alpha-1 [OS=Homo sapiens]	0	FALSE	201.507	31	23	60	23	1	906	100	6.29	203.46	23	0	4961.3	4819.7	4461.6	4521.1	6699.4	6309.6		4961.3	5192.08	4312.33	4415.22	7600.06	7417.21	5076.69	4363.78	0.859572	7508.63	1.47904	0.333525	0.0040096	FALSE
FALSE	High	Master Protein	P54819	Adenylate kinase 2, mitochondrial [OS=Homo sapiens]	0	FALSE	201.474	63	15	166	15	1	239	26.5	7.81	622.13	15	0	21760.6	20657.7	23138.7	23106.5	20860.1	20245		21760.6	22253.7	22364.6	22565.4	23664.5	23798.9	22007.2	22465	1.0208	23731.7	1.07836	0.854299	0.743992	TRUE
FALSE	High	Master Protein	Q9UMS4	Pre-mRNA-processing factor 19 [OS=Homo sapiens]	0	FALSE	200.806	61	20	96	20	1	504	55.1	6.61	354.09	20	0	12566.2	11786.3	12835.5	12803.5	10694.2	10388.5		12566.2	12696.9	12406.1	12503.7	12131.9	12212.1	12631.6	12454.9	0.986012	12172	0.96362	0.897007	0.761008	TRUE
FALSE	High	Master Protein	Q8IX01-1	SURP and G-patch domain-containing protein 2 [OS=Homo sapiens]	0	FALSE	200.689	34	32	95	32	1	1082	120.1	7.28	305.52	32	0	13669.3	12524.1	12813.9	12766.5	9461	9383.6		13669.3	13491.7	12385.2	12467.5	10732.9	11030.8	13580.5	12426.4	0.915014	10881.9	0.801286	0.402614	0.14914	TRUE
FALSE	High	Master Protein	Q9Y2W1	Thyroid hormone receptor-associated protein 3 [OS=Homo sapiens]	0	FALSE	200.512	29	31	81	30	1	955	108.6	10.15	284.92	31	0	11307.5	10088.8	11395.4	11115.9	8847.1	8314.4		11307.5	10868.3	11014.1	10855.6	10036.5	9773.93	11087.9	10934.9	0.986199	9905.22	0.893337	0.845294	0.480847	TRUE
FALSE	High	Master Protein	Q9P2N5	RNA-binding protein 27 [OS=Homo sapiens]	0	FALSE	200.406	26	23	101	21	1	1060	118.6	9.19	317.11	23	0	11780.9	10409.9	12239.9	12164.6	7526.1	7393		11780.9	11214.2	11830.4	11879.7	8537.9	8690.79	11497.5	11855.1	1.0311	8614.35	0.749234	0.855196	0.0629296	FALSE
FALSE	High	Master Protein	Q15652	probable JmjC domain-containing histone demethylation protein 2C [OS=Homo sapiens]	0	FALSE	200.137	17	34	72	33	1	2540	284.3	7.87	254.53	34	0	6034.4	5576.8	7025.7	7012.7	5225.9	5126		6034.4	6007.67	6790.64	6848.47	5928.47	6025.83	6021.04	6819.56	1.13262	5977.15	0.992711	0.558217	0.886473	FALSE
FALSE	High	Master Protein	A0FGR8-6	Isoform 6 of Extended synaptotagmin-2 [OS=Homo sapiens]	0	FALSE	199.915	31	27	71	1	1	942	104.6	9.33	275.88	27	25	6512.7	6222.5	7805.6	7718	7006	6834.6		6512.7	6703.26	7544.45	7537.26	7947.88	8034.37	6607.98	7540.85	1.14117	7991.12	1.20931	0.530067	0.255015	TRUE
FALSE	High	Master Protein	Q8NBF2-1	NHL repeat-containing protein 2 [OS=Homo sapiens]	0	FALSE	199.386	38	23	70	22	1	726	79.4	5.55	268.64	23	0	6882	6337.6	9008	8946.1	3981.3	3828.4		6882	6827.25	8706.62	8736.6	4516.54	4500.45	6854.63	8721.61	1.27237	4508.5	0.65773	0.12044	0.0240364	FALSE
FALSE	High	Master Protein	Q9Y5K5-3	Isoform 3 of Ubiquitin carboxyl-terminal hydrolase isozyme L5 [OS=Homo sapiens]	0	FALSE	198.878	81	22	72	1	1	328	37.5	5.4	280.46	22	20	9167.7	8598.8	10217.2	10059	9136.5	8751.5		9167.7	9263.15	9875.37	9823.43	10364.8	10287.8	9215.43	9849.4	1.06879	10326.3	1.12054	0.729409	0.486999	TRUE
FALSE	High	Master Protein	P16930-2	Isoform 2 of Fumarylacetoacetase [OS=Homo sapiens]	0	FALSE	198.868	48	13	168	1	1	349	38.6	7.21	461.67	13	0	264.8	256.6	350.8	343	260.6	263.3		264.8	276.425	339.063	334.968	295.635	309.52	270.613	337.015	1.24538	302.578	1.11812	0.306205	0.508732	TRUE
FALSE	High	Master Protein	Q6IA86-6	Isoform 6 of Elongator complex protein 2 [OS=Homo sapiens]	0	FALSE	198.722	35	28	102	28	1	891	99.9	6.42	357.29	28	0	11116.1	10562.2	10491.9	10192	9482	9115.5		11116.1	11378.2	10140.9	9953.32	10756.8	10715.7	11247.2	10047.1	0.8933	10736.2	0.954569	0.345941	0.830342	TRUE
FALSE	High	Master Protein	Q68CP9-1	AT-rich interactive domain-containing protein 2 [OS=Homo sapiens]	0	FALSE	198.529	23	30	74	30	1	1835	197.3	7.42	266.24	30	0	6573.4	6023	7199.6	6941	4863.4	4723.6		6573.4	6488.34	6958.73	6778.45	5517.23	5552.79	6530.87	6868.59	1.05171	5535.01	0.847515	0.85385	0.368826	FALSE
FALSE	High	Master Protein	P55010	Eukaryotic translation initiation factor 5 [OS=Homo sapiens]	0	FALSE	198.413	44	21	149	20	1	431	49.2	5.58	453.6	21	0	20078.5	18589.3	17630.8	17538	17814	16675.2		20078.5	20025.5	17040.9	17127.3	20208.9	19602.4	20052	17084.1	0.85199	19905.7	0.992701	0.142914	0.724025	TRUE
FALSE	High	Master Protein	P47756-2	Isoform 2 of F-actin-capping protein subunit beta [OS=Homo sapiens]	0	FALSE	198.335	63	24	192	24	1	272	30.6	6	631.21	24	0	24476.3	22460.1	25862.9	25685	22792.8	21897.4		24476.3	24195.4	24997.6	25083.5	25857.1	25741.3	24335.8	25040.6	1.02896	25799.2	1.06013	0.809439	0.833729	TRUE
FALSE	High	Master Protein	P63241-2	Isoform 2 of Eukaryotic translation initiation factor 5A-1 [OS=Homo sapiens]	0	FALSE	198.12	60	14	219	14	1	184	20.2	7.01	686.56	14	0	34895.8	31390	35047.8	36614.6	29947.7	29130.7		34895.8	33815.2	33875.2	35757.1	33973.9	34244.4	34355.5	34816.2	1.01341	34109.1	0.992828	0.895383	0.724996	FALSE
FALSE	High	Master Protein	O60293	Zinc finger C3H1 domain-containing protein [OS=Homo sapiens]	0	FALSE	198.044	21	35	69	35	1	1989	226.2	8.13	226.31	35	0	9271.7	8301.6	10812.4	10437.3	7387.7	7145.7		9271.7	8942.99	10450.7	10192.9	8380.9	8400.08	9107.35	10321.8	1.13335	8390.49	0.921288	0.466223	0.630546	FALSE
FALSE	High	Master Protein	O14964	Hepatocyte growth factor-regulated tyrosine kinase substrate [OS=Homo sapiens]	0	FALSE	198.006	36	30	96	30	1	777	86.1	6.16	335.9	30	0	14225.8	12590.2	9384.5	9365.8	12024.3	11424.1		14225.8	13562.9	9070.53	9146.47	13640.8	13429.5	13894.4	9108.5	0.655553	13535.2	0.974149	0.00430189	0.820059	TRUE
FALSE	High	Master Protein	Q9BVP2	Guanine nucleotide-binding protein-like 3 [OS=Homo sapiens]	0	FALSE	197.858	51	25	97	24	1	549	62	9.16	336.51	25	1	15839.1	14287.8	11562.9	11577.4	12788	12607.5		15839.1	15391.7	11176	11306.3	14507.2	14820.7	15615.4	11241.2	0.719877	14663.9	0.939069	0.019405	0.62911	TRUE
FALSE	High	Master Protein	P40222	alpha-taxilin [OS=Homo sapiens]	0	FALSE	197.844	56	25	94	24	1	546	61.9	6.52	331.3	25	1	11626.7	10328.3	15499	15124.6	12212.7	11337.4		11626.7	11126.3	14980.5	14770.4	13854.6	13327.6	11376.5	14875.4	1.30756	13591.1	1.19466	0.0793451	0.235289	TRUE
FALSE	High	Master Protein	Q9UN37	Vacuolar protein sorting-associated protein 4A [OS=Homo sapiens]	0	FALSE	197.816	51	20	101	15	1	437	48.9	7.8	333.51	20	5	10712.2	9935.8	12245.6	12087.3	10733.2	10339.4		10712.2	10703.5	11835.9	11804.2	12176.2	12154.4	10707.8	11820.1	1.10387	12165.3	1.13611	0.550968	0.41238	TRUE
FALSE	High	Master Protein	P60900	Proteasome subunit alpha type-6 [OS=Homo sapiens]	0	FALSE	197.774	75	20	235	20	1	246	27.4	6.76	740.67	20	0	21174.8	19363.3	21865.3	21484.9	19113.8	18350.9		21174.8	20859.3	21133.8	20981.8	21683.4	21572.3	21017.1	21057.8	1.00194	21627.9	1.02906	0.959653	0.991125	TRUE
FALSE	High	Master Protein	P27695	DNA-(apurinic or apyrimidinic site) lyase [OS=Homo sapiens]	0	FALSE	197.753	59	21	67	21	1	318	35.5	8.12	261.77	21	0	11277.9	9941.9	11289.4	11253.7	8190.2	7763.2		11277.9	10710	10911.7	10990.2	9291.29	9125.97	10994	10950.9	0.996086	9208.63	0.837608	0.907975	0.24952	TRUE
FALSE	High	Master Protein	Q92769	Histone deacetylase 2 [OS=Homo sapiens]	0	FALSE	197.216	42	19	123	12	1	488	55.3	5.91	391.79	19	9	12637	11235.3	11750.2	11844.7	9993.6	9454.3		12637	12103.4	11357.1	11567.3	11337.1	11113.9	12370.2	11462.2	0.926599	11225.5	0.907468	0.49993	0.554048	TRUE
FALSE	High	Master Protein	P12236	ADP/ATP translocase 3 [OS=Homo sapiens]	0	FALSE	196.906	62	23	186	5	1	298	32.8	9.74	646.71	23	6	7482	7553.9	8490.4	8658.7	7749.9	7855.2		7482	8137.52	8206.34	8455.93	8791.79	9234.12	7809.76	8331.13	1.06676	9012.96	1.15406	0.7385	0.388452	TRUE
FALSE	High	Master Protein	Q9H7D7	WD repeat-containing protein 26 [OS=Homo sapiens]	0	FALSE	196.519	39	20	88	20	1	661	72.1	6.16	310.04	20	0	6952.6	6498	8832.4	8596	6609.7	6564		6952.6	7000.04	8536.9	8394.7	7498.3	7716.26	6976.32	8465.8	1.2135	7607.28	1.09044	0.228622	0.488739	TRUE
FALSE	High	Master Protein	Q641Q2	WASH complex subunit 2A [OS=Homo sapiens]	0	FALSE	196.411	26	22	47	5	1	1341	147.1	4.81	218.32	22	0	2021.6	1886.1	1969.4	1978.1	1740.6	1668.8		2021.6	2031.82	1903.51	1931.78	1974.61	1961.75	2026.71	1917.64	0.946185	1968.18	0.971118	0.687036	0.885453	TRUE
FALSE	High	Master Protein	P07686	Beta-hexosaminidase subunit beta [OS=Homo sapiens]	0	FALSE	196.363	40	24	90	22	1	556	63.1	6.76	319.49	24	2	12820.6	11623.5	14735.3	14440.6	13465.1	12879.9		12820.6	12521.5	14242.3	14102.4	15275.3	15140.9	12671.1	14172.4	1.11848	15208.1	1.20022	0.496894	0.221823	TRUE
FALSE	High	Master Protein	Q99615-1	DnaJ homolog subfamily C member 7 [OS=Homo sapiens]	0	FALSE	196.139	54	32	84	32	1	494	56.4	6.96	290.13	32	0	21181.9	18800.7	20389	20150	15750.3	14937.8		21181.9	20253.3	19706.9	19678.1	17867.8	17560	20717.6	19692.5	0.950521	17713.9	0.855017	0.629007	0.273435	TRUE
FALSE	High	Master Protein	Q12996-1	Cleavage stimulation factor subunit 3 [OS=Homo sapiens]	0	FALSE	196.012	44	30	107	30	1	717	82.9	8.12	344.76	30	0	13774.1	12529.1	13982.4	13769.6	10493.8	10175.6		13774.1	13497.1	13514.6	13447.1	11904.6	11961.9	13635.6	13480.9	0.988652	11933.2	0.875151	0.917859	0.342856	TRUE
FALSE	High	Master Protein	Q5SW79-1	Centrosomal protein of 170 kDa [OS=Homo sapiens]	0	FALSE	195.969	24	31	71	30	1	1584	175.2	7.11	251.68	31	1	8128.1	7566	10723.3	10449	5698.5	5474.9		8128.1	8150.56	10364.5	10204.3	6464.6	6435.98	8139.33	10284.4	1.26355	6450.29	0.792484	0.133454	0.216269	FALSE
FALSE	High	Master Protein	Q99700-1	Ataxin-2 [OS=Homo sapiens]	0	FALSE	195.714	27	25	66	24	1	1313	140.2	9.57	241.34	25	0	7138.3	6617.2	7583	7546.7	6872.2	6494.1		7138.3	7128.45	7329.3	7369.97	7796.09	7634.09	7133.38	7349.63	1.03032	7715.09	1.08155	0.937748	0.520678	TRUE
FALSE	High	Master Protein	Q6P3W7	SCY1-like protein 2 [OS=Homo sapiens]	0	FALSE	195.467	25	22	81	22	1	929	103.6	8.22	260.98	22	0	10101.2	9472.1	11903.7	11809.2	8655.6	8226.4		10101.2	10203.9	11505.4	11532.6	9819.25	9670.49	10152.6	11519	1.13459	9744.87	0.959843	0.461701	0.863437	FALSE
FALSE	High	Master Protein	Q9BZE4	Nucleolar GTP-binding protein 1 [OS=Homo sapiens]	0	FALSE	195.393	45	26	65	26	1	634	73.9	9.5	221.54	26	0	10407	9415.3	8389	8578.9	8051.1	7964.3		10407	10142.7	8108.33	8378	9133.49	9362.38	10274.9	8243.16	0.802265	9247.93	0.900053	0.109123	0.51497	TRUE
FALSE	High	Master Protein	Q96A65	Exocyst complex component 4 [OS=Homo sapiens]	0	FALSE	195.368	38	31	95	31	1	974	110.4	6.49	299.15	31	0	9729.1	9016.2	10664.4	10665.5	7991.9	7592.6		9729.1	9712.8	10307.6	10415.7	9066.33	8925.43	9720.95	10361.7	1.06591	8995.88	0.925411	0.742298	0.654212	FALSE
FALSE	High	Master Protein	Q5T1M5	FK506-binding protein 15 [OS=Homo sapiens]	0	FALSE	195.365	29	27	47	27	1	1219	133.5	5.2	215	27	0	6271.3	5551.4	6391.2	6229.5	5263.8	5180.4		6271.3	5980.31	6177.37	6083.62	5971.46	6089.78	6125.8	6130.49	1.00077	6030.62	0.984462	0.871119	0.923216	FALSE
FALSE	High	Master Protein	Q7KZI7-14	Isoform 14 of Serine/threonine-protein kinase MARK2 [OS=Homo sapiens]	0	FALSE	195.275	40	29	73	20	1	745	83.1	9.66	253.25	29	9	8382.7	7591.6	8758.8	8426.7	9336.4	8933.7		8382.7	8178.14	8465.76	8229.36	10591.6	10501.9	8280.42	8347.56	1.00811	10546.8	1.2737	0.984946	0.14438	TRUE
FALSE	High	Master Protein	P49448	Glutamate dehydrogenase 2, mitochondrial [OS=Homo sapiens]	0	FALSE	195.26	44	22	94	6	1	558	61.4	8.46	323.47	22	0	1611.2	1513	1821.1	1830.3	1400.3	1427.1		1611.2	1629.9	1760.17	1787.44	1588.56	1677.62	1620.55	1773.8	1.09457	1633.09	1.00774	0.691008	0.796547	TRUE
FALSE	High	Master Protein	Q9Y3F4-2	Isoform 2 of Serine-threonine kinase receptor-associated protein [OS=Homo sapiens]	0	FALSE	195.244	65	19	121	19	1	363	39.8	5.31	441.35	19	0	18073.2	17027.7	17038.9	16623.2	16069.3	15493.8		18073.2	18343.3	16468.8	16233.9	18229.6	18213.6	18208.2	16351.4	0.898021	18221.6	1.00074	0.314267	0.973024	FALSE
FALSE	High	Master Protein	Q9UJV9	Probable ATP-dependent RNA helicase DDX41 [OS=Homo sapiens]	0	FALSE	195.124	43	27	85	27	1	622	69.8	6.84	290.06	27	0	12086	11192.4	11117.5	11135	10341.6	10112.9		12086	12057.1	10745.5	10874.2	11731.9	11888.1	12071.6	10809.9	0.895484	11810	0.978335	0.355006	0.843843	TRUE
FALSE	High	Master Protein	P52597	Heterogeneous nuclear ribonucleoprotein F [OS=Homo sapiens]	0	FALSE	195.035	57	15	358	13	1	415	45.6	5.58	1191.82	15	0	47426.2	45848.4	45021.9	44321.1	29596.1	29486.1		47426.2	49390.7	43515.6	43283.2	33575	34662.2	48408.5	43399.4	0.896525	34118.6	0.704806	0.317311	0.00100512	TRUE
FALSE	High	Master Protein	P11310-2	Isoform 2 of Medium-chain specific acyl-CoA dehydrogenase, mitochondrial [OS=Homo sapiens]	0	FALSE	194.972	50	23	137	23	1	425	47	8.31	509.94	23	0	13813.9	12881.1	17880	17336.5	10490.3	10279.2		13813.9	13876.3	17281.8	16930.5	11900.6	12083.6	13845.1	17106.2	1.23554	11992.1	0.866164	0.178633	0.310582	FALSE
FALSE	High	Master Protein	O00159-1	Unconventional myosin-Ic [OS=Homo sapiens]	0	FALSE	194.952	36	33	77	33	1	1063	121.6	9.41	292.18	33	0	10001.1	9375.4	12166.7	11772.8	15208	14430.9		10001.1	10099.8	11759.6	11497.1	17252.6	16964.1	10050.4	11628.4	1.157	17108.3	1.70225	0.384897	1.24548e-05	TRUE
FALSE	High	Master Protein	Q96T37-1	Putative RNA-binding protein 15 [OS=Homo sapiens]	0	FALSE	194.942	36	31	94	28	1	977	107.1	10.08	344.75	31	3	12359.7	11145.5	9980.6	9937.2	10151.5	10095.9		12359.7	12006.6	9646.68	9704.49	11516.3	11868.2	12183.2	9675.59	0.794177	11692.2	0.959703	0.081873	0.73937	TRUE
FALSE	High	Master Protein	P50579	methionine aminopeptidase 2 [OS=Homo sapiens]	0	FALSE	194.936	56	21	88	3	1	478	52.9	5.82	336.57	21	19	9603.8	8819.2	11651.8	11295.8	9483.3	9029.3		9603.8	9500.58	11262	11031.3	10758.2	10614.3	9552.19	11146.6	1.16692	10686.3	1.11873	0.353565	0.492704	TRUE
FALSE	High	Master Protein	P23284	peptidyl-prolyl cis-trans isomerase B [OS=Homo sapiens]	0	FALSE	194.867	68	20	418	19	1	216	23.7	9.41	1356.56	20	1	44019.1	40003.8	45471.1	45180	38597.6	36984.2		44019.1	43094.5	43949.8	44122	43786.6	43476.5	43556.8	44035.9	1.011	43631.6	1.00172	0.908844	0.79398	TRUE
FALSE	High	Master Protein	P30837	Aldehyde dehydrogenase X, mitochondrial [OS=Homo sapiens]	0	FALSE	194.44	49	18	73	16	1	517	57.2	6.8	296.36	18	0	7709.9	7284.5	8686	8756.2	6848	6893.4		7709.9	7847.31	8395.4	8551.14	7768.64	8103.49	7778.6	8473.27	1.0893	7936.06	1.02024	0.64013	0.845886	TRUE
FALSE	High	Master Protein	Q96P48-6	Arf-GAP with Rho-GAP domain, ANK repeat and PH domain-containing protein 1 [OS=Homo sapiens]	0	FALSE	194.373	29	33	87	32	1	1450	162.1	6.23	309.9	33	0	8144.6	7592.9	7842.7	7690.8	5844.6	5573.2		8144.6	8179.54	7580.31	7510.69	6630.34	6551.54	8162.07	7545.5	0.92446	6590.94	0.807509	0.4965	0.258369	TRUE
FALSE	High	Master Protein	P08133-1	annexin A6 [OS=Homo sapiens]	0	FALSE	194.336	46	29	76	29	1	673	75.8	5.6	253.93	29	0	13843.7	13123.6	14638.7	14337	12361.4	11931.3		13843.7	14137.5	14148.9	14001.3	14023.3	14025.8	13990.6	14075.1	1.00604	14024.5	1.00242	0.968082	0.982819	TRUE
FALSE	High	Master Protein	Q9UBB9-1	Tuftelin-interacting protein 11 [OS=Homo sapiens]	0	FALSE	194.263	33	25	71	25	1	837	96.8	5.67	241.17	25	0	9382.2	8804.4	9226.1	9098.3	8601	8297.5		9382.2	9484.64	8917.43	8885.23	9757.31	9754.07	9433.42	8901.33	0.943595	9755.69	1.03416	0.590666	0.791886	FALSE
FALSE	High	Master Protein	O60678	protein arginine N-methyltransferase 3 [OS=Homo sapiens]	0	FALSE	194.262	37	18	70	18	1	531	59.8	5.35	265.21	18	0	9337.9	8685.2	8881.5	8757.7	7676.8	7320.5		9337.9	9356.23	8584.36	8552.61	8708.86	8605.56	9347.06	8568.48	0.916703	8657.21	0.926196	0.45072	0.658758	TRUE
FALSE	High	Master Protein	Q9Y5X3	sorting nexin-5 [OS=Homo sapiens]	0	FALSE	193.751	47	21	78	21	1	404	46.8	6.76	262.19	21	0	10594.6	9652.1	12321	12245.5	8455.4	8052.8		10594.6	10397.8	11908.8	11958.7	9592.14	9466.41	10496.2	11933.8	1.13696	9529.28	0.907877	0.432782	0.556248	FALSE
FALSE	High	Master Protein	Q9BZK7	F-box-like/WD repeat-containing protein TBL1XR1 [OS=Homo sapiens]	0	FALSE	193.659	43	18	99	12	1	514	55.6	5.55	453.01	18	6	7436.5	6917.9	9130.7	9091	5550	5477.3		7436.5	7452.39	8825.22	8878.1	6296.14	6438.8	7444.44	8851.66	1.18903	6367.47	0.855332	0.289691	0.428344	FALSE
FALSE	High	Master Protein	Q16822-1	Phosphoenolpyruvate carboxykinase [GTP], mitochondrial [OS=Homo sapiens]	0	FALSE	193.619	47	27	104	25	1	640	70.7	7.62	334.75	27	2	9824.5	9026.2	10907.4	11271.3	6125.2	6175.4		9824.5	9723.58	10542.5	11007.3	6948.67	7259.45	9774.04	10774.9	1.1024	7104.06	0.726829	0.585638	0.0889719	FALSE
FALSE	High	Master Protein	Q13501-1	sequestosome-1 [OS=Homo sapiens]	0	FALSE	193.589	58	15	67	15	1	440	47.7	5.22	295.83	15	0	4693.6	4391.3	6382.6	6174.8	9245.7	8825		4693.6	4730.58	6169.06	6030.2	10488.7	10374.2	4712.09	6099.63	1.29446	10431.4	2.21376	0.155521	7.62128e-10	TRUE
FALSE	High	Master Protein	Q969G3	SWI/SNF-related matrix-associated actin-dependent regulator of chromatin subfamily E member 1 [OS=Homo sapiens]	0	FALSE	193.412	57	21	72	20	1	411	46.6	4.88	270.67	21	0	9144.8	8333.8	9176.9	9289.6	7433.1	7316.8		9144.8	8977.68	8869.87	9072.05	8432.4	8601.21	9061.24	8970.96	0.990037	8516.81	0.939916	0.869532	0.740129	TRUE
FALSE	High	Master Protein	Q13492-1	Phosphatidylinositol-binding clathrin assembly protein [OS=Homo sapiens]	0	FALSE	193.387	35	18	100	18	1	652	70.7	7.9	361.84	18	0	13484.8	12102.4	14535.5	14541.4	8432.3	8166.4		13484.8	13037.4	14049.2	14200.9	9565.93	9599.95	13261.1	14125	1.06515	9582.94	0.722634	0.706837	0.0381873	FALSE
FALSE	High	Master Protein	Q9H307	Pinin [OS=Homo sapiens]	0	FALSE	193.297	33	26	80	26	1	717	81.6	7.14	255.2	26	0	10021	8788.2	8999.3	9040.8	7535.2	7486.7		10021	9467.19	8698.21	8829.08	8548.23	8800.94	9744.09	8763.65	0.89938	8674.58	0.89024	0.37155	0.465539	TRUE
FALSE	High	Master Protein	Q15637-6	Isoform 6 of Splicing factor 1 [OS=Homo sapiens]	0	FALSE	193.284	34	16	103	2	1	571	61.9	9.28	400.74	16	0	1088.3	1180.1	1127.5	1146.3	1077.3	1093.6		1088.3	1271.28	1089.78	1119.46	1222.13	1285.57	1179.79	1104.62	0.936284	1253.85	1.06278	0.688537	0.694236	FALSE
FALSE	High	Master Protein	Q5T5C0-1	Syntaxin-binding protein 5 [OS=Homo sapiens]	0	FALSE	193.282	27	24	85	24	1	1151	127.5	7.28	266.18	24	0	6274.8	5687.9	10116.3	9729.6	4411.6	4205.2		6274.8	6127.35	9777.84	9501.75	5004.69	4943.39	6201.08	9639.8	1.55454	4974.04	0.802126	0.00125559	0.225537	FALSE
FALSE	High	Master Protein	P98160	Basement membrane-specific heparan sulfate proteoglycan core protein [OS=Homo sapiens]	0	FALSE	193.222	12	34	59	34	1	4391	468.5	6.51	202.58	34	0	2928.9	2867.7	4136.5	3958	3122	2963.6		2928.9	3089.26	3998.11	3865.31	3541.72	3483.84	3009.08	3931.71	1.30661	3512.78	1.16739	0.0872958	0.370642	TRUE
FALSE	High	Master Protein	Q9BQ39	ATP-dependent RNA helicase DDX50 [OS=Homo sapiens]	0	FALSE	193.065	33	23	86	21	1	737	82.5	9.17	280.67	23	0	10817.4	9793.7	10696.1	10412.1	7140.9	6974.2		10817.4	10550.4	10338.2	10168.3	8100.92	8198.47	10683.9	10253.3	0.959693	8149.69	0.762802	0.683007	0.0799531	TRUE
FALSE	High	Master Protein	Q9Y5K5-1	Ubiquitin carboxyl-terminal hydrolase isozyme L5 [OS=Homo sapiens]	0	FALSE	192.858	81	22	70	1	1	329	37.6	5.33	274.29	22	0	207.8	198.8	252.8	238.5	242.5	212.4		207.8	214.16	244.342	232.915	275.102	249.685	210.98	238.628	1.13105	262.393	1.24369	0.645231	0.257258	TRUE
FALSE	High	Master Protein	P12004	proliferating cell nuclear antigen [OS=Homo sapiens]	0	FALSE	192.841	78	18	200	18	1	261	28.8	4.69	694.85	18	0	36062.4	32144.6	26396.8	26609.2	25580.4	24761.4		36062.4	34628.1	25513.7	25986.1	29019.4	29108.1	35345.3	25749.9	0.728523	29063.8	0.822281	0.0067251	0.036523	TRUE
FALSE	High	Master Protein	P07910-2	Isoform C1 of Heterogeneous nuclear ribonucleoproteins C1/C2 [OS=Homo sapiens]	0	FALSE	192.807	43	16	336	16	1	293	32.3	5.08	1185.6	16	0	38492.2	36779.3	38162	37397.2	30701.7	31436.7		38492.2	39620.9	36885.2	36521.4	34829.2	36955.2	39056.6	36703.3	0.939748	35892.2	0.91898	0.575468	0.269202	TRUE
FALSE	High	Master Protein	Q6PI48	Aspartate--tRNA ligase, mitochondrial [OS=Homo sapiens]	0	FALSE	192.662	50	27	100	27	1	645	73.5	8.02	312.73	27	0	10028.8	9302.9	12028.7	12004	6564.8	6528.1		10028.8	10021.7	11626.3	11722.9	7447.37	7674.06	10025.2	11674.6	1.16452	7560.71	0.754169	0.360991	0.131685	FALSE
FALSE	High	Master Protein	Q16698	2,4-dienoyl-CoA reductase, mitochondrial [OS=Homo sapiens]	0	FALSE	192.583	64	20	126	20	1	335	36	9.28	422.08	20	0	13513.1	12383.9	18244	18884.4	11636.4	11702.5		13513.1	13340.7	17633.6	18442.2	13200.8	13756.8	13426.9	18037.9	1.34341	13478.8	1.00386	0.0501859	0.991204	TRUE
FALSE	High	Master Protein	Q9UKE5-4	Isoform 4 of TRAF2 and NCK-interacting protein kinase [OS=Homo sapiens]	0	FALSE	192.434	29	33	76	1	1	1352	153.9	7.17	252.2	33	1	456.5	421.3	431.3	414.7	577.9	548.1		456.5	453.85	416.87	404.988	655.593	644.315	455.175	410.929	0.902794	649.954	1.42792	0.557648	0.0604272	FALSE
FALSE	High	Master Protein	P11172	uridine 5'-monophosphate synthase [OS=Homo sapiens]	0	FALSE	192.047	51	23	89	23	1	480	52.2	7.24	283.85	23	0	12535.6	11463.9	10003.6	9704.3	10685.4	10146.9		12535.6	12349.6	9668.91	9477.04	12121.9	11928.1	12442.6	9572.98	0.769371	12025	0.966439	0.0524422	0.776701	TRUE
FALSE	High	Master Protein	Q9ULT8	E3 ubiquitin-protein ligase hectd1 [OS=Homo sapiens]	0	FALSE	191.929	18	37	62	37	1	2610	289.2	5.35	213.69	37	0	5909.2	5440.7	5796.4	5685.1	7419.8	6942.2		5909.2	5861.06	5602.47	5551.96	8417.31	8160.85	5885.13	5577.22	0.94768	8289.08	1.40848	0.595375	0.0329639	FALSE
FALSE	High	Master Protein	Q9UBC2-4	Isoform 4 of Epidermal growth factor receptor substrate 15-like 1 [OS=Homo sapiens]	0	FALSE	191.824	40	26	73	1	1	601	66.4	5.26	276.8	26	0	278.1	225.1	178.1	174.1	200.1	186		278.1	242.492	172.141	170.023	227.001	218.651	260.296	171.082	0.657261	222.826	0.85605	0.0624212	0.672132	TRUE
FALSE	High	Master Protein	Q96RP9	Elongation factor G, mitochondrial [OS=Homo sapiens]	0	FALSE	191.679	31	25	85	25	1	751	83.4	7.01	297.44	25	0	13213.6	12053.2	11235.8	11357.8	11555.7	11511.3		13213.6	12984.4	10859.9	11091.8	13109.2	13532	13099	10975.9	0.837914	13320.6	1.01692	0.165118	0.942319	FALSE
FALSE	High	Master Protein	P67936	Tropomyosin alpha-4 chain [OS=Homo sapiens]	0	FALSE	191.496	60	24	82	14	1	248	28.5	4.69	305.92	24	0	6993	6051.7	10040.1	9746.2	8366.6	7326.7		6993	6519.26	9704.19	9517.96	9491.4	8612.85	6756.13	9611.08	1.42257	9052.13	1.33984	0.0145454	0.0734776	TRUE
FALSE	High	Master Protein	P62937	peptidyl-prolyl cis-trans isomerase A [OS=Homo sapiens]	0	FALSE	191.426	64	13	805	12	1	165	18	7.81	2605.25	13	0	95499.8	93327.4	116620	114641	90804.9	87674.8		95499.8	100538	112718	111957	103013	103065	98018.9	112337	1.14608	103039	1.05122	0.285927	0.878493	TRUE
FALSE	High	Master Protein	P49593	Protein phosphatase 1F [OS=Homo sapiens]	0	FALSE	191.097	60	20	82	20	1	454	49.8	5.1	334.37	20	0	9171.7	9139.6	8685.4	8604	6131.5	6030.7		9171.7	9845.74	8394.82	8402.51	6955.82	7089.35	9508.72	8398.66	0.883259	7022.58	0.738541	0.306182	0.105659	TRUE
FALSE	High	Master Protein	O75475-1	PC4 and SFRS1-interacting protein [OS=Homo sapiens]	0	FALSE	191.029	35	19	141	8	1	530	60.1	9.13	391.16	19	9	10772.4	9521.7	10386.9	10396.9	6151.7	5944		10772.4	10257.4	10039.4	10153.4	6978.73	6987.43	10514.9	10096.4	0.960202	6983.08	0.664114	0.686012	0.0320015	TRUE
FALSE	High	Master Protein	Q8IY18	structural maintenance of chromosomes protein 5 [OS=Homo sapiens]	0	FALSE	190.987	25	28	64	28	1	1101	128.7	8.38	234.8	28	0	9241.1	8629.1	8938.8	8649.5	7592.7	7350.5		9241.1	9295.8	8639.74	8446.94	8613.46	8640.83	9268.45	8543.34	0.921766	8627.14	0.930808	0.475547	0.685718	TRUE
FALSE	High	Master Protein	Q9BSL1	ubiquitin-associated domain-containing protein 1 [OS=Homo sapiens]	0	FALSE	190.935	57	24	70	24	1	405	45.3	4.92	260.77	24	0	12500.1	11630.4	11265.7	11389.6	8825.6	8518.1		12500.1	12529	10888.8	11122.9	10012.1	10013.4	12514.5	11005.8	0.879444	10012.8	0.800089	0.2919	0.146456	TRUE
FALSE	High	Master Protein	O60825-1	6-phosphofructo-2-kinase/fructose-2,6-bisphosphatase 2 [OS=Homo sapiens]	0	FALSE	190.805	51	28	80	23	1	505	58.4	8.38	266.07	28	5	9773.4	9076.2	11755.9	11534.1	14526.8	13630.3		9773.4	9777.44	11362.6	11264	16479.8	16023	9775.42	11313.3	1.15732	16251.4	1.66247	0.383868	3.78756e-05	TRUE
FALSE	High	Master Protein	Q9UKE5-3	Isoform 3 of TRAF2 and NCK-interacting protein kinase [OS=Homo sapiens]	0	FALSE	190.525	29	33	75	1	1	1305	148.7	6.98	250.01	33	28	8469.9	7655.9	8050.7	8004.9	8508.9	7903.4		8469.9	8247.4	7781.35	7817.44	9652.83	9290.79	8358.65	7799.4	0.933092	9471.81	1.13317	0.538648	0.448364	FALSE
FALSE	High	Master Protein	Q9HCC0-1	Methylcrotonoyl-CoA carboxylase beta chain, mitochondrial [OS=Homo sapiens]	0	FALSE	190.419	41	19	88	19	1	563	61.3	7.68	295.4	19	0	7187.8	6644.3	7816.4	7819.9	4409.1	4374		7187.8	7157.65	7554.89	7636.77	5001.86	5141.82	7172.72	7595.83	1.05899	5071.84	0.707101	0.825637	0.0617955	FALSE
FALSE	High	Master Protein	P06396-2	Isoform 2 of Gelsolin [OS=Homo sapiens]	0	FALSE	190.371	42	24	109	8	1	731	80.6	5.85	413.15	24	16	7470.5	6736	12686.9	12209.9	14264.5	13156.7		7470.5	7256.43	12262.4	11924	16182.2	15466.3	7363.47	12093.2	1.64232	15824.2	2.14902	0.000254177	7.45776e-13	TRUE
FALSE	High	Master Protein	Q9H0B6	Kinesin light chain 2 [OS=Homo sapiens]	0	FALSE	190.221	47	28	96	21	1	622	68.9	7.15	338.55	28	0	4539.5	4113.1	5542.5	5498.4	5857.6	5531.2		4539.5	4430.88	5357.07	5369.64	6645.09	6502.16	4485.19	5363.35	1.19579	6573.63	1.46563	0.367105	0.00507892	TRUE
FALSE	High	Master Protein	Q8IUR7-1	Armadillo repeat-containing protein 8 [OS=Homo sapiens]	0	FALSE	189.976	38	22	83	10	1	673	75.5	6.73	287.88	22	14	10728.2	9987.1	10971.5	10636	9384.1	8901.3		10728.2	10758.7	10604.4	10386.9	10645.7	10463.9	10743.5	10495.7	0.976937	10554.8	0.982438	0.787434	0.995499	TRUE
FALSE	High	Master Protein	P43034	Platelet-activating factor acetylhydrolase IB subunit alpha [OS=Homo sapiens]	0	FALSE	189.851	50	22	134	21	1	410	46.6	7.37	435.68	22	1	18160.2	16460.2	19745.2	19379.8	18940	17907.8		18160.2	17731.9	19084.6	18926	21486.3	21051.4	17946.1	19005.3	1.05902	21268.8	1.18515	0.732888	0.312555	TRUE
FALSE	High	Master Protein	Q99439	Calponin-2 [OS=Homo sapiens]	0	FALSE	189.831	68	18	112	16	1	309	33.7	7.33	393.4	18	2	13433.3	12226.8	10226.3	9984.5	9727.6	9240.4		13433.3	13171.5	9884.16	9750.68	11035.4	10862.5	13302.4	9817.42	0.73802	10948.9	0.823081	0.0284013	0.204823	TRUE
FALSE	High	Master Protein	P25789	Proteasome subunit alpha type-4 [OS=Homo sapiens]	0	FALSE	189.803	79	18	154	18	1	261	29.5	7.72	601.53	18	0	14269.4	13792.9	15570.9	15339.3	13148.4	12716.7		14269.4	14858.6	15050	14980.1	14916.1	14949	14564	15015	1.03097	14932.5	1.02531	0.855757	0.900561	TRUE
FALSE	High	Master Protein	Q9H7Z7	Prostaglandin E synthase 2 [OS=Homo sapiens]	0	FALSE	189.466	48	16	59	16	1	377	41.9	9.16	244.21	16	0	9090.9	8431.7	8325.7	8613.2	11212.6	11097.8		9090.9	9083.14	8047.15	8411.49	12720	13045.9	9087.02	8229.32	0.905613	12883	1.41773	0.410943	0.00972333	FALSE
FALSE	High	Master Protein	O94973	AP-2 complex subunit alpha-2 [OS=Homo sapiens]	0	FALSE	189.344	34	27	85	15	1	939	103.9	6.96	299.45	27	0	4157.2	3953.6	4427.6	4362	3639.6	3549.3		4157.2	4259.06	4279.47	4259.85	4128.91	4172.35	4208.13	4269.66	1.01462	4150.63	0.986336	0.955189	0.899014	FALSE
FALSE	High	Master Protein	P35659-1	Protein DEK [OS=Homo sapiens]	0	FALSE	189.165	37	20	157	20	1	375	42.6	8.56	484.64	20	0	24263.2	21478.7	23340.9	23515.7	17530.7	17011.5		24263.2	23138.2	22560	22965	19887.5	19997.7	23700.7	22762.5	0.960415	19942.6	0.841437	0.726611	0.0579992	TRUE
FALSE	High	Master Protein	P43487	Ran-specific GTPase-activating protein [OS=Homo sapiens]	0	FALSE	188.615	62	10	386	10	1	201	23.3	5.29	1155.39	10	0	32625.6	30796.4	31467.9	31592.7	26013.9	25074.4		32625.6	33175.8	30415.1	30852.9	29511.2	29476	32900.7	30634	0.931104	29493.6	0.896444	0.516982	0.181963	TRUE
FALSE	High	Master Protein	P51149	ras-related protein Rab-7a [OS=Homo sapiens]	0	FALSE	188.532	81	17	165	17	1	207	23.5	6.7	534.64	17	0	16143.2	15463.8	17800.7	17641.4	17464.3	16994.6		16143.2	16658.6	17205.2	17228.3	19812.2	19977.9	16400.9	17216.7	1.04974	19895	1.21305	0.772943	0.234692	TRUE
FALSE	High	Master Protein	O43747-1	AP-1 complex subunit gamma-1 [OS=Homo sapiens]	0	FALSE	188.324	33	27	106	26	1	822	91.3	6.8	335.4	27	2	14129.3	12762.3	15406	15275.6	16307.6	15150.2		14129.3	13748.3	14890.6	14917.9	18500	17809.7	13938.8	14904.2	1.06926	18154.8	1.30247	0.689523	0.0624933	TRUE
FALSE	High	Master Protein	O43395	U4/U6 small nuclear ribonucleoprotein Prp3 [OS=Homo sapiens]	0	FALSE	188.185	43	20	84	20	1	683	77.5	9.5	303.2	20	0	10452.5	9845.5	9792.1	9574.5	8142	7780.6		10452.5	10606.2	9464.49	9350.28	9236.61	9146.43	10529.3	9407.39	0.893445	9191.52	0.872944	0.34654	0.385198	TRUE
FALSE	High	Master Protein	Q6YHU6	Thyroid adenoma-associated protein [OS=Homo sapiens]	0	FALSE	188.168	18	31	64	31	1	1953	219.5	6.06	217.25	31	0	7688.6	7370.2	7407.2	7288.6	6134.7	5764.1		7688.6	7939.63	7159.38	7117.91	6959.45	6775.95	7814.12	7138.65	0.913558	6867.7	0.878883	0.445895	0.531666	TRUE
FALSE	High	Master Protein	P48059-3	Isoform 3 of LIM and senescent cell antigen-like-containing domain protein 1 [OS=Homo sapiens]	0	FALSE	188.053	57	23	108	23	1	387	44.4	8.02	347.64	23	0	10415.7	9444	11440	11501.1	8427.3	8046		10415.7	10173.7	11057.3	11231.8	9560.26	9458.42	10294.7	11144.5	1.08255	9509.34	0.923714	0.669036	0.644428	FALSE
FALSE	High	Master Protein	Q96RL7	Vacuolar protein sorting-associated protein 13a [OS=Homo sapiens]	0	FALSE	187.929	13	34	58	34	1	3174	360	6.33	193.19	34	0	6138.8	5790.7	7221.5	7298.7	6376.1	6202.1		6138.8	6238.1	6979.89	7127.78	7233.3	7290.83	6188.45	7053.84	1.13984	7262.07	1.17349	0.534413	0.246345	TRUE
FALSE	High	Master Protein	P12235	ADP/ATP translocase 1 [OS=Homo sapiens]	0	FALSE	187.815	66	20	157	4	1	298	33	9.76	564.58	20	0	1916.9	1945.6	1978.2	1977.6	1655.4	1646.3		1916.9	2095.92	1912.02	1931.29	1877.95	1935.3	2006.41	1921.65	0.957757	1906.62	0.950266	0.735225	0.97088	TRUE
FALSE	High	Master Protein	Q5MIZ7-1	Serine/threonine-protein phosphatase 4 regulatory subunit 3B [OS=Homo sapiens]	0	FALSE	187.729	34	30	82	18	1	849	97.4	4.96	275.14	30	12	8754.6	7968.3	9622.4	9573.6	5349.6	5010.3		8754.6	8583.94	9300.47	9349.4	6068.8	5889.82	8669.27	9324.94	1.07563	5979.31	0.689713	0.699168	0.049606	FALSE
FALSE	High	Master Protein	Q9Y295	developmentally-regulated GTP-binding protein 1 [OS=Homo sapiens]	0	FALSE	187.657	60	23	88	22	1	367	40.5	8.9	316.56	23	1	13383.3	12278.8	12974.7	12648.5	11778.3	11227.5		13383.3	13227.5	12540.6	12352.3	13361.8	13198.4	13305.4	12446.5	0.935445	13280.1	0.998099	0.526496	0.957712	TRUE
FALSE	High	Master Protein	O14787-2	Isoform 2 of Transportin-2 [OS=Homo sapiens]	0	FALSE	187.323	33	24	87	14	1	887	100.3	4.98	296.47	24	0	4458	4280.5	5058.6	4954.1	4014.1	3843.3		4458	4611.22	4889.36	4838.08	4553.75	4517.96	4534.61	4863.72	1.07258	4535.86	1.00028	0.799035	0.839984	TRUE
FALSE	High	Master Protein	Q9Y4E1-4	Isoform 4 of WASH complex subunit 2C [OS=Homo sapiens]	0	FALSE	187.081	29	26	44	9	1	1320	144.8	4.79	195	26	18	6836.4	6437.2	6894.7	6731.8	5608.5	5605		6836.4	6934.55	6664.03	6574.15	6362.5	6588.92	6885.47	6619.09	0.961312	6475.71	0.940489	0.687758	0.84949	TRUE
FALSE	High	Master Protein	Q9NVI1-3	Fanconi anemia group I protein [OS=Homo sapiens]	0	FALSE	187.039	27	34	85	34	1	1328	149.2	6.74	276.44	34	0	10921	10013.7	9650.8	9191.2	6056.7	6016.2		10921	10787.4	9327.92	8975.96	6870.96	7072.3	10854.2	9151.94	0.843171	6971.63	0.642299	0.178377	0.0215232	TRUE
FALSE	High	Master Protein	P31930	Cytochrome b-c1 complex subunit 1, mitochondrial [OS=Homo sapiens]	0	FALSE	186.925	47	17	123	17	1	480	52.6	6.37	526.67	17	0	8469	8303.1	12180.5	12419.3	8646.8	8619		8469	8944.61	11773	12128.5	9809.27	10132	8706.8	11950.7	1.37257	9970.64	1.14515	0.0336556	0.413383	TRUE
FALSE	High	Master Protein	Q96JC1-1	Vam6/Vps39-like protein [OS=Homo sapiens]	0	FALSE	186.9	32	29	73	29	1	886	101.7	6.99	235.85	29	0	6359.4	6016	6796.9	6570.4	5593.6	5374.9		6359.4	6480.8	6569.5	6416.53	6345.6	6318.43	6420.1	6493.02	1.01136	6332.01	0.986279	0.980663	0.915106	FALSE
FALSE	High	Master Protein	O76003	glutaredoxin-3 [OS=Homo sapiens]	0	FALSE	186.661	44	16	128	16	1	335	37.4	5.39	452.8	16	0	18469.5	17225	17629.3	17041.7	20994.3	19605.9		18469.5	18555.8	17039.5	16642.6	23816.8	23047.6	18512.7	16841	0.909704	23432.2	1.26574	0.373533	0.127135	FALSE
FALSE	High	Master Protein	P26583	High mobility group protein B2 [OS=Homo sapiens]	0	FALSE	186.499	66	21	384	19	1	209	24	7.81	1165.22	21	0	26287.2	23687.3	26446.9	26780.2	14975.4	14376.9		26287.2	25517.4	25562.1	26153.1	16988.7	16900.7	25902.3	25857.6	0.998273	16944.7	0.654176	0.980252	0.0105259	TRUE
FALSE	High	Master Protein	Q9ULH1-2	Isoform 1 of Arf-GAP with SH3 domain, ANK repeat and PH domain-containing protein 1 [OS=Homo sapiens]	0	FALSE	186.48	29	24	63	21	1	1132	125.8	7.52	251.8	24	3	6780.3	6313.9	10485.2	10167.5	5925.1	5658.9		6780.3	6801.72	10134.4	9929.39	6721.67	6652.28	6791.01	10031.9	1.47723	6686.97	0.98468	0.00564713	0.922242	FALSE
FALSE	High	Master Protein	Q9UNH7-1	Sorting nexin-6 [OS=Homo sapiens]	0	FALSE	186.448	51	25	76	24	1	406	46.6	6.16	277.9	25	1	11152.8	10496.2	12329.3	12518.9	9619.6	9230.2		11152.8	11307.1	11916.8	12225.7	10912.9	10850.5	11230	12071.3	1.07491	10881.7	0.968985	0.665991	0.921339	FALSE
FALSE	High	Master Protein	Q9UPN9-1	E3 ubiquitin-protein ligase TRIM33 [OS=Homo sapiens]	0	FALSE	186.367	28	26	89	2	1	1127	122.5	6.67	296.36	26	25	8648	7794.5	8613.6	8624.8	4775	4699.7		8648	8396.71	8325.42	8422.82	5416.95	5524.7	8522.36	8374.12	0.982606	5470.82	0.641938	0.822732	0.0204769	TRUE
FALSE	High	Master Protein	P20290-2	Isoform 2 of Transcription factor BTF3 [OS=Homo sapiens]	0	FALSE	186.137	77	11	99	1	1	162	17.7	7.5	426.83	11	0	2707.3	2198.5	2083.6	2238	2419	2202.5		2707.3	2368.36	2013.89	2185.59	2744.21	2589.13	2537.83	2099.74	0.827376	2666.67	1.05077	0.285916	0.641593	FALSE
FALSE	High	Master Protein	Q03252	Lamin-B2 [OS=Homo sapiens]	0	FALSE	186.032	51	33	83	28	1	620	69.9	5.59	302.07	33	0	11544.9	10570.4	9859.3	9701.2	9527.5	9358.5		11544.9	11387.1	9529.44	9474.01	10808.4	11001.3	11466	9501.73	0.828688	10904.8	0.95106	0.143663	0.808482	TRUE
FALSE	High	Master Protein	Q7Z3U7-5	Isoform 5 of Protein MON2 homolog [OS=Homo sapiens]	0	FALSE	185.963	22	33	75	33	1	1711	189.6	6.06	236.63	33	0	9361	8757.9	10153.8	9823.2	7368.2	7063.8		9361	9434.55	9814.09	9593.16	8358.78	8303.8	9397.77	9703.62	1.03254	8331.29	0.886517	0.895791	0.447501	FALSE
FALSE	High	Master Protein	O15014	zinc finger protein 609 [OS=Homo sapiens]	0	FALSE	185.744	26	26	81	26	1	1411	151.1	8.03	314.28	26	0	8055.8	7336.6	9156.9	8996.3	5409.5	5203.5		8055.8	7903.44	8850.54	8785.62	6136.75	6116.94	7979.62	8818.08	1.10508	6126.84	0.767812	0.57478	0.158243	FALSE
FALSE	High	Master Protein	Q9ULX6	A-kinase anchor protein 8-like [OS=Homo sapiens]	0	FALSE	185.637	33	21	72	21	1	646	71.6	5.07	238.47	21	0	8809.5	7678.8	8828.7	8936.4	8000.4	7636.5		8809.5	8272.07	8533.32	8727.12	9075.97	8977.03	8540.79	8630.22	1.01047	9026.5	1.05687	0.999917	0.706009	TRUE
FALSE	High	Master Protein	Q9GZZ1-1	N-alpha-acetyltransferase 50 [OS=Homo sapiens]	0	FALSE	185.508	70	19	130	19	1	169	19.4	8.81	436.92	19	0	13822.3	12707.2	14469.8	14318.6	10528.5	10203.7		13822.3	13689	13985.7	13983.3	11943.9	11994.9	13755.6	13984.5	1.01664	11969.4	0.870146	0.920122	0.324628	FALSE
FALSE	High	Master Protein	O43149	Zinc finger ZZ-type and EF-hand domain-containing protein 1 [OS=Homo sapiens]	0	FALSE	185.503	15	38	70	38	1	2961	330.9	5.95	238.05	38	0	6719.1	6268.3	7014.9	6800.1	6707.3	6459.5		6719.1	6752.6	6780.21	6640.85	7609.03	7593.42	6735.85	6710.53	0.996241	7601.22	1.12847	0.889996	0.364853	FALSE
FALSE	High	Master Protein	O43396	Thioredoxin-like protein 1 [OS=Homo sapiens]	0	FALSE	185.309	78	16	81	16	1	289	32.2	4.96	273.86	16	0	9221.1	8459	10188.6	9843.6	8711.4	8438.5		9221.1	9112.55	9847.72	9613.08	9882.56	9919.82	9166.83	9730.4	1.06148	9901.19	1.08011	0.76224	0.621841	TRUE
FALSE	High	Master Protein	O75155-1	Cullin-associated NEDD8-dissociated protein 2 [OS=Homo sapiens]	0	FALSE	185.301	24	24	54	20	1	1236	135.2	5.68	208	24	0	5130.3	4759.9	5264.2	5121	3698.6	3482.7		5130.3	5127.66	5088.08	5001.07	4195.84	4094.06	5128.98	5044.58	0.983544	4144.95	0.808144	0.77803	0.252712	TRUE
FALSE	High	Master Protein	P30084	Enoyl-CoA hydratase, mitochondrial [OS=Homo sapiens]	0	FALSE	185.248	56	17	94	17	1	290	31.4	8.07	335.42	17	0	13033.3	12039.2	15338.2	15757.3	9283.4	9131.8		13033.3	12969.4	14825	15388.3	10531.5	10734.8	13001.3	15106.7	1.16193	10633.1	0.81785	0.354214	0.190249	FALSE
FALSE	High	Master Protein	Q8IY33-1	MICAL-like protein 2 [OS=Homo sapiens]	0	FALSE	185.177	36	24	89	23	1	904	97.4	9.57	316.99	24	1	6709.7	6063.3	8373	8123.6	6052.7	5761.4		6709.7	6531.76	8092.87	7933.36	6866.42	6772.77	6620.73	8013.11	1.21031	6819.6	1.03004	0.331662	0.72435	TRUE
FALSE	High	Master Protein	Q9UPN9-2	Isoform Beta of E3 ubiquitin-protein ligase TRIM33 [OS=Homo sapiens]	0	FALSE	185.153	28	25	86	1	1	1110	120.5	6.67	289.91	25	0	152.2	143.7	175.7	166.2	97.8	91.8		152.2	154.802	169.822	162.308	110.948	107.915	153.501	166.065	1.08185	109.432	0.712903	0.778133	0.260663	FALSE
FALSE	High	Master Protein	P40818	ubiquitin carboxyl-terminal hydrolase 8 [OS=Homo sapiens]	0	FALSE	185.052	29	32	94	32	1	1118	127.4	8.51	310.89	32	0	8900.1	8173.2	10750.4	10816.2	7555.4	7367.2		8900.1	8804.67	10390.7	10562.9	8571.14	8660.46	8852.39	10476.8	1.1835	8615.8	0.973275	0.304879	0.948674	FALSE
FALSE	High	Master Protein	Q5VTR2	E3 ubiquitin-protein ligase BRE1A [OS=Homo sapiens]	0	FALSE	184.924	34	29	50	26	1	975	113.6	5.94	199.7	29	3	9749.5	9104.8	11082.8	10788.1	5768	5623.9		9749.5	9808.25	10712	10535.5	6543.45	6611.14	9778.87	10623.7	1.0864	6577.29	0.672602	0.652513	0.0371273	FALSE
FALSE	High	Master Protein	O75306-1	NADH dehydrogenase [ubiquinone] iron-sulfur protein 2, mitochondrial [OS=Homo sapiens]	0	FALSE	184.879	52	18	105	18	1	463	52.5	7.55	364.35	18	0	9622.1	9260.8	11199.9	11233.3	8281.3	8240.6		9622.1	9976.3	10825.2	10970.2	9394.63	9687.18	9799.2	10897.7	1.1121	9540.91	0.973641	0.546717	0.951015	FALSE
FALSE	High	Master Protein	Q9NV70-1	exocyst complex component 1 [OS=Homo sapiens]	0	FALSE	184.877	29	23	73	23	1	894	101.9	6.61	260.09	23	0	9085.5	8558.5	10359.3	10029.6	8532.8	8094.1		9085.5	9219.74	10012.7	9794.72	9679.94	9514.96	9152.62	9903.72	1.08206	9597.45	1.0486	0.671139	0.736912	TRUE
FALSE	High	Master Protein	P23193	Transcription elongation factor A protein 1 [OS=Homo sapiens]	0	FALSE	184.736	55	20	138	20	1	301	33.9	8.38	511.65	20	0	12144.1	11174.5	12468.6	12160.1	7647.2	7403.1		12144.1	12037.9	12051.4	11875.3	8675.29	8702.66	12091	11963.4	0.989447	8688.97	0.718633	0.924154	0.0352996	TRUE
FALSE	High	Master Protein	P52294	Importin subunit alpha-5 [OS=Homo sapiens]	0	FALSE	184.724	41	23	74	10	1	538	60.2	5.01	287.14	23	0	2962.5	2798	3472.8	3248.9	2502.6	2398.8		2962.5	3014.18	3356.61	3172.82	2839.05	2819.89	2988.34	3264.71	1.09248	2829.47	0.946837	0.648664	0.92535	FALSE
FALSE	High	Master Protein	Q14254	Flotillin-2 [OS=Homo sapiens]	0	FALSE	184.661	49	21	81	21	1	428	47	5.25	288.96	21	0	9534	9192.4	14025.7	14542	9147.9	9202.6		9534	9902.62	13556.4	14201.5	10377.7	10818.1	9718.31	13878.9	1.42812	10597.9	1.09051	0.0146855	0.585651	TRUE
FALSE	High	Master Protein	Q9NX02	NACHT, LRR and PYD domains-containing protein 2 [OS=Homo sapiens]	0	FALSE	184.657	30	31	74	31	1	1062	120.4	6.07	271.4	31	0	10380.9	9580.5	7164	7153.5	8451.1	8070.7		10380.9	10320.7	6924.32	6985.98	9587.26	9487.45	10350.8	6955.15	0.671943	9537.36	0.921413	0.00972047	0.631256	TRUE
FALSE	High	Master Protein	Q9Y617-1	phosphoserine aminotransferase [OS=Homo sapiens]	0	FALSE	184.63	50	18	113	18	1	370	40.4	7.66	424.96	18	0	19627.5	18001.6	12682.3	13520.2	9564.4	9388		19627.5	19392.4	12258	13203.6	10850.2	11036	19510	12730.8	0.652527	10943.1	0.560899	0.000554907	0.000754734	TRUE
FALSE	High	Master Protein	P36551	Oxygen-dependent coproporphyrinogen-III oxidase, mitochondrial [OS=Homo sapiens]	0	FALSE	184.51	47	21	90	21	1	454	50.1	8.25	342.25	21	0	7093.7	6934.3	11185	10939.5	10407.7	10202		7093.7	7470.05	10810.8	10683.3	11806.9	11992.9	7281.88	10747.1	1.47586	11899.9	1.63418	0.00578936	8.05832e-05	TRUE
FALSE	High	Master Protein	Q15057	Arf-GAP with coiled-coil, ANK repeat and PH domain-containing protein 2 [OS=Homo sapiens]	0	FALSE	184.431	35	25	74	24	1	778	88	6.8	267.34	25	1	10997.4	10007.7	11269.2	11024.6	9863.5	9734.5		10997.4	10780.9	10892.2	10766.4	11189.5	11443.3	10889.2	10829.3	0.994503	11316.4	1.03924	0.897893	0.772425	FALSE
FALSE	High	Master Protein	Q15061	WD repeat-containing protein 43 [OS=Homo sapiens]	0	FALSE	184.25	33	22	71	22	1	677	74.8	5.57	288.86	22	0	11424.4	10331.9	8213	8293.4	6145.7	6011.5		11424.4	11130.2	7938.22	8099.18	6971.92	7066.78	11277.3	8018.7	0.711049	7019.35	0.622433	0.0219923	0.0147208	TRUE
FALSE	High	Master Protein	P15880	40S ribosomal protein S2 [OS=Homo sapiens]	0	FALSE	184.095	55	21	442	21	1	293	31.3	10.24	1343.86	21	0	40004	38260.2	40394.1	40971.1	36597.3	35464		40004	41216.2	39042.7	40011.6	41517.4	41689.5	40610.1	39527.1	0.973332	41603.4	1.02446	0.827313	0.976704	FALSE
FALSE	High	Master Protein	Q96I99-1	Succinate--CoA ligase [GDP-forming] subunit beta, mitochondrial [OS=Homo sapiens]	0	FALSE	184.022	50	21	85	20	1	432	46.5	6.39	321.9	21	0	16797.5	15765	19422.2	19788.4	12372.4	12245.5		16797.5	16983	18772.4	19325	14035.7	14395.1	16890.3	19048.7	1.12779	14215.4	0.841634	0.463974	0.233001	FALSE
FALSE	High	Master Protein	P25787	Proteasome subunit alpha type-2 [OS=Homo sapiens]	0	FALSE	183.967	65	14	115	14	1	234	25.9	7.43	460.81	14	0	8032.1	7560.2	8857.2	8968	7595.3	7592.2		8032.1	8144.31	8560.87	8757.98	8616.41	8924.96	8088.21	8659.43	1.07062	8770.68	1.08438	0.721274	0.606865	TRUE
FALSE	High	Master Protein	Q9UNM6	26S proteasome non-ATPase regulatory subunit 13 [OS=Homo sapiens]	0	FALSE	183.602	58	25	136	25	1	376	42.9	5.81	430.6	25	0	26290.8	24669.8	25408.4	24940.8	23173.5	21848.8		26290.8	26575.8	24558.3	24356.7	26288.9	25684.2	26433.3	24457.5	0.925254	25986.6	0.983099	0.47922	0.651985	TRUE
FALSE	High	Master Protein	P20290-1	transcription factor BTF3 [OS=Homo sapiens]	0	FALSE	183.579	63	11	83	1	1	206	22.2	9.38	403.42	11	12	9141.2	8188.5	8460.1	8470.2	9394.2	9058.1		9141.2	8821.15	8177.05	8271.84	10657.2	10648.2	8981.18	8224.45	0.915743	10652.7	1.18611	0.455796	0.306585	FALSE
FALSE	High	Master Protein	O60256-1	Phosphoribosyl pyrophosphate synthase-associated protein 2 [OS=Homo sapiens]	0	FALSE	183.262	66	21	77	18	1	369	40.9	7.44	256.79	21	3	7427.1	6852.2	8412	8316.5	6011.1	5690.2		7427.1	7381.61	8130.56	8121.74	6819.23	6689.07	7404.35	8126.15	1.09748	6754.15	0.912186	0.680914	0.696586	FALSE
FALSE	High	Master Protein	P83436	Conserved oligomeric Golgi complex subunit 7 [OS=Homo sapiens]	0	FALSE	183.152	36	24	52	24	1	770	86.3	5.47	193.87	24	0	6627.2	6225.3	7449.4	7522.1	6435.5	6158.5		6627.2	6706.27	7200.17	7345.94	7300.69	7239.58	6666.74	7273.06	1.09095	7270.13	1.09051	0.704835	0.48851	TRUE
FALSE	High	Master Protein	P53004	Biliverdin reductase A [OS=Homo sapiens]	0	FALSE	183.148	52	19	139	19	1	296	33.4	6.44	486.64	19	0	16432.8	15795.2	19811.6	19455.9	14870.2	14415.2		16432.8	17015.6	19148.8	19000.3	16869.3	16945.7	16724.2	19074.5	1.14054	16907.5	1.01096	0.420944	0.972071	TRUE
FALSE	High	Master Protein	O95487-3	Isoform 3 of Protein transport protein Sec24B [OS=Homo sapiens]	0	FALSE	183.136	24	23	77	19	1	1298	140.3	6.57	247.41	23	4	8154.4	7483.3	9063.3	9044.1	6272.9	6052.3		8154.4	8061.47	8760.07	8832.3	7116.23	7114.74	8107.93	8796.19	1.08489	7115.48	0.877595	0.658981	0.525704	FALSE
FALSE	High	Master Protein	Q9UNZ2-5	Isoform 3 of NSFL1 cofactor p47 [OS=Homo sapiens]	0	FALSE	183.07	59	23	73	23	1	372	40.8	5.15	293.19	23	0	9826.6	9148.3	9076.3	8876.2	8710.5	8233.9		9826.6	9855.11	8772.64	8668.33	9881.53	9679.3	9840.85	8720.49	0.886151	9780.42	0.993859	0.317311	0.950039	TRUE
FALSE	High	Master Protein	Q05397	Focal adhesion kinase 1 [OS=Homo sapiens]	0	FALSE	183.048	26	27	73	5	1	1052	119.2	6.62	237.67	27	25	7745.2	7197.3	9327.6	9221.1	6003.1	5757.5		7745.2	7753.37	9015.53	9005.16	6810.15	6768.19	7749.29	9010.34	1.16273	6789.17	0.876103	0.36659	0.518842	FALSE
FALSE	High	Master Protein	A0FGR8-2	Isoform 2 of Extended synaptotagmin-2 [OS=Homo sapiens]	0	FALSE	183.024	33	27	68	1	1	893	98.8	8.68	259.72	27	0	47.8	43.5	49.9	61.1	39.2	38.6		47.8	46.8609	48.2305	59.6691	44.47	45.376	47.3304	53.9498	1.13985	44.923	0.949135	0.65681	0.982031	FALSE
FALSE	High	Master Protein	Q9NVE7	pantothenate kinase 4 [OS=Homo sapiens]	0	FALSE	182.875	36	27	79	27	1	773	85.9	6.28	262.9	27	0	9168.1	8581.6	9955.3	10025.7	8338.7	8108.1		9168.1	9244.63	9622.23	9790.91	9459.75	9531.42	9206.36	9706.57	1.05433	9495.58	1.03142	0.794736	0.802473	TRUE
FALSE	High	Master Protein	Q14232	Translation initiation factor eIF-2B subunit alpha [OS=Homo sapiens]	0	FALSE	182.864	62	19	131	19	1	305	33.7	7.33	433.08	19	0	16000.4	14933.7	14639.8	14383.2	15494.8	14754.3		16000.4	16087.5	14150	14046.4	17577.9	17344.3	16043.9	14098.2	0.878723	17461.1	1.08833	0.230677	0.602982	FALSE
FALSE	High	Master Protein	Q6BDS2	UHRF1-binding protein 1 [OS=Homo sapiens]	0	FALSE	182.598	27	33	74	30	1	1440	159.4	6.14	229.47	33	3	6900.8	6340.6	7398.1	7147.9	6060.3	5722.6		6900.8	6830.48	7150.59	6980.51	6875.04	6727.16	6865.64	7065.55	1.02912	6801.1	0.9906	0.942482	0.895858	FALSE
FALSE	High	Master Protein	Q9BYT8	Neurolysin, mitochondrial [OS=Homo sapiens]	0	FALSE	182.461	41	26	80	26	1	704	80.6	6.64	285.3	26	0	12310.4	11405.6	13009	13154.5	10178.6	9718.8		12310.4	12286.8	12573.8	12846.4	11547	11424.9	12298.6	12710.1	1.03346	11485.9	0.933922	0.844662	0.602736	FALSE
FALSE	High	Master Protein	Q93074-2	Isoform 2 of Mediator of RNA polymerase II transcription subunit 12 [OS=Homo sapiens]	0	FALSE	182.399	18	33	63	33	1	2180	243.2	7.09	203.92	33	0	6166.7	5673.4	6591.9	6420.5	5868	5555.1		6166.7	6111.73	6371.36	6270.14	6656.89	6530.26	6139.22	6320.75	1.02957	6593.57	1.07401	0.940695	0.548569	TRUE
FALSE	High	Master Protein	P42898-2	Isoform 2 of Methylenetetrahydrofolate reductase [OS=Homo sapiens]	0	FALSE	182.14	50	25	72	25	1	697	78.9	5.66	281.17	25	0	7162.3	6716.5	7478.5	7267.3	7111.2	6744.2		7162.3	7235.43	7228.3	7097.11	8067.23	7928.1	7198.86	7162.7	0.994977	7997.66	1.11096	0.882463	0.517466	FALSE
FALSE	High	Master Protein	Q13356	Peptidyl-prolyl cis-trans isomerase-like 2 [OS=Homo sapiens]	0	FALSE	182.014	48	23	80	3	1	520	58.8	8.78	270.7	23	22	9325.7	8600.6	8361.1	8516.2	6157	6036.6		9325.7	9265.09	8081.37	8316.76	6984.74	7096.28	9295.4	8199.07	0.882057	7040.51	0.757419	0.317311	0.137675	TRUE
FALSE	High	Master Protein	Q14149	MORC family CW-type zinc finger protein 3 [OS=Homo sapiens]	0	FALSE	181.945	38	33	94	32	1	939	107	5.6	332.54	33	1	16391.1	15432	13300.8	13159.9	14940	14589.3		16391.1	16624.3	12855.8	12851.7	16948.5	17150.3	16507.7	12853.8	0.778652	17049.4	1.03282	0.0281019	0.863402	FALSE
FALSE	High	Master Protein	P39880-3	Isoform 3 of Homeobox protein cut-like 1 [OS=Homo sapiens]	0	FALSE	181.933	25	32	68	19	1	1516	165.6	5.86	229.72	32	12	7037.1	6444.4	5988.8	5798.2	5890.4	5858		7037.1	6942.3	5788.44	5662.42	6682.3	6886.33	6989.7	5725.43	0.819123	6784.32	0.970616	0.154374	0.985219	TRUE
FALSE	High	Master Protein	O96019-1	Actin-like protein 6A [OS=Homo sapiens]	0	FALSE	181.73	48	19	88	19	1	429	47.4	5.6	316.3	19	0	12838.9	11747.5	15206.7	14983.8	11329.1	11100.6		12838.9	12655.1	14697.9	14632.9	12852.2	13049.2	12747	14665.4	1.1505	12950.7	1.01598	0.388999	0.947004	TRUE
FALSE	High	Master Protein	Q6YN16	Hydroxysteroid dehydrogenase-like protein 2 [OS=Homo sapiens]	0	FALSE	181.61	52	20	89	20	1	418	45.4	7.99	303.26	20	0	9694.3	8773.6	10381.5	10631.3	6804.9	6749.1		9694.3	9451.46	10034.2	10382.3	7719.75	7933.86	9572.88	10208.3	1.06637	7826.8	0.817602	0.740232	0.289658	FALSE
FALSE	High	Master Protein	O43852-4	Isoform 4 of Calumenin [OS=Homo sapiens]	0	FALSE	181.578	50	15	48	1	1	323	38.1	4.58	211.9	15	0	409.2	382.1	412.2	394.5	453.6	446		409.2	411.622	398.409	385.261	514.582	524.292	410.411	391.835	0.954739	519.437	1.26565	0.773368	0.180891	FALSE
FALSE	High	Master Protein	P45880-1	Isoform 1 of Voltage-dependent anion-selective channel protein 2 [OS=Homo sapiens]	0	FALSE	181.544	62	17	320	16	1	309	33.4	7.59	1194.58	17	0	29542.8	30276.7	37323.4	37992.1	37091.5	38263.7		29542.8	32615.9	36074.7	37102.4	42078.1	44980.6	31079.4	36588.5	1.17726	43529.3	1.40059	0.198089	0.0169249	TRUE
FALSE	High	Master Protein	P22307-1	Non-specific lipid-transfer protein [OS=Homo sapiens]	0	FALSE	181.337	49	24	84	24	1	547	59	6.89	272.68	24	0	11523.8	10226.9	11281.4	11248.8	10396.9	10072.8		11523.8	11017	10904	10985.4	11794.7	11841	11270.4	10944.7	0.971097	11817.8	1.04857	0.751527	0.786531	FALSE
FALSE	High	Master Protein	Q9H361	Polyadenylate-binding protein 3 [OS=Homo sapiens]	0	FALSE	181.215	28	19	165	1	1	631	70	9.67	657.91	19	0	644.6	571.5	656.8	693.9	562.6	511	Acetyl [N-Term]	644.6	615.655	634.826	677.65	638.236	600.702	630.127	656.238	1.04144	619.469	0.983085	0.924669	0.982193	FALSE
FALSE	High	Master Protein	Q92917	G patch domain and KOW motifs-containing protein [OS=Homo sapiens]	0	FALSE	180.961	59	23	81	23	1	476	52.2	6.15	292.95	23	0	8159.4	7563.9	9101.3	9015.6	6997.3	6778.3		8159.4	8148.3	8796.8	8804.47	7938.01	7968.18	8153.85	8800.64	1.07932	7953.1	0.97538	0.683029	0.962113	FALSE
FALSE	High	Master Protein	P54198	Protein HIRA [OS=Homo sapiens]	0	FALSE	180.741	26	22	80	22	1	1017	111.8	8.07	261.42	22	0	7770.9	7224.1	8056.1	7978.1	7510.5	7345.6		7770.9	7782.24	7786.57	7791.27	8520.21	8635.07	7776.57	7788.92	1.00159	8577.64	1.10301	0.921963	0.543478	TRUE
FALSE	High	Master Protein	P36873-2	Isoform Gamma-2 of Serine/threonine-protein phosphatase PP1-gamma catalytic subunit [OS=Homo sapiens]	0	FALSE	180.687	59	21	71	4	1	337	38.5	6.13	263.54	21	0	827.4	719.8	976.9	1030.6	627.1	612.5		827.4	775.413	944.216	1006.47	711.407	720.02	801.406	975.341	1.21704	715.713	0.893072	0.369656	0.663732	FALSE
FALSE	High	Master Protein	Q6ZU65-1	Ubinuclein-2 [OS=Homo sapiens]	0	FALSE	180.641	24	28	75	28	1	1347	146	9.19	248.17	28	0	7264.4	6827.7	8080.9	7912.8	8849.8	8643.6		7264.4	7355.22	7810.54	7727.5	10039.6	10160.9	7309.81	7769.02	1.06282	10100.2	1.38174	0.810866	0.0456058	TRUE
FALSE	High	Master Protein	Q9BWU0	kanadaptin [OS=Homo sapiens]	0	FALSE	180.605	51	29	79	29	1	796	88.8	5.19	285.25	29	0	11712	10711.2	11339.5	10993.4	10403	9988.6		11712	11538.8	10960.1	10736	11801.6	11742	11625.4	10848	0.933134	11771.8	1.01259	0.533921	0.96391	FALSE
FALSE	High	Master Protein	Q99707	methionine synthase [OS=Homo sapiens]	0	FALSE	180.524	27	28	62	28	1	1265	140.4	5.58	206.85	28	0	6020.2	5703.2	5362.4	5379.7	3898.5	3774.4		6020.2	6143.84	5182.99	5253.72	4422.61	4436.97	6082.02	5218.35	0.857997	4429.79	0.728342	0.248434	0.0828896	TRUE
FALSE	High	Master Protein	Q14651	Plastin-1 [OS=Homo sapiens]	0	FALSE	180.457	34	21	114	16	1	629	70.2	5.41	402.98	21	2	13281.6	12453.3	14039.8	13853.8	6712	6444.3		13281.6	13415.5	13570.1	13529.4	7614.36	7575.55	13348.5	13549.7	1.01507	7594.95	0.568973	0.927187	0.00484347	FALSE
FALSE	High	Master Protein	Q9NUL3	Double-stranded RNA-binding protein Staufen homolog 2 [OS=Homo sapiens]	0	FALSE	180.372	40	19	75	1	1	570	62.6	9.61	267.58	19	19	8681.6	8170.5	8424.5	8634.2	6533.6	6080.7		8681.6	8801.76	8142.65	8432	7411.97	7148.12	8741.68	8287.32	0.948024	7280.05	0.832797	0.615497	0.3414	TRUE
FALSE	High	Master Protein	P07737	profilin-1 [OS=Homo sapiens]	0	FALSE	180.356	75	14	367	10	1	140	15	8.27	1263.65	14	7	42881.9	41974.4	48957.3	49245.1	37590	37293.5		42881.9	45217.4	47319.4	48091.9	42643.6	43840.1	44049.6	47705.6	1.083	43241.8	0.981661	0.533784	0.641453	FALSE
FALSE	High	Master Protein	Q14247-1	Src substrate cortactin [OS=Homo sapiens]	0	FALSE	180.036	45	22	60	22	1	550	61.5	5.4	228.89	22	0	12118	10879.6	12751.3	12482	13675.2	12578.8		12118	11720.2	12324.7	12189.7	15513.7	14786.9	11919.1	12257.2	1.02837	15150.3	1.2711	0.867388	0.0956975	TRUE
FALSE	High	Master Protein	Q14202	Zinc finger MYM-type protein 3 [OS=Homo sapiens]	0	FALSE	179.999	25	26	60	26	1	1370	152.3	6.35	214.59	26	0	7797.5	7238.3	7401.8	7311.8	4764.2	4704.2		7797.5	7797.54	7154.16	7140.57	5404.7	5529.99	7797.52	7147.37	0.91662	5467.34	0.701164	0.459807	0.0562964	TRUE
FALSE	High	Master Protein	Q9UQB8	Brain-specific angiogenesis inhibitor 1-associated protein 2 [OS=Homo sapiens]	0	FALSE	179.948	56	27	75	27	1	552	60.8	8.9	257.64	27	0	11746.5	10894.5	11168.2	11006	11344.2	10927.7		11746.5	11736.2	10794.6	10748.3	12869.3	12846	11741.4	10771.4	0.91739	12857.6	1.09507	0.454043	0.573848	FALSE
FALSE	High	Master Protein	O43491-1	band 4.1-like protein 2 [OS=Homo sapiens]	0	FALSE	179.944	35	30	77	28	1	1005	112.5	5.44	247.81	30	2	12104.5	11040.4	10969.2	10633.5	7232.3	6894.3		12104.5	11893.4	10602.2	10384.5	8204.61	8104.55	11998.9	10493.3	0.874522	8154.58	0.679608	0.27415	0.015622	TRUE
FALSE	High	Master Protein	Q6P1N0	Coiled-coil and C2 domain-containing protein 1A [OS=Homo sapiens]	0	FALSE	179.844	40	28	66	1	1	951	104	8.09	238.83	28	0	378.7	346.9	528.5	519.9	410.2	399		378.7	373.702	510.818	507.725	465.347	469.042	376.201	509.272	1.35372	467.194	1.24187	0.0976708	0.218114	TRUE
FALSE	High	Master Protein	Q9NRF8	CTP synthase 2 [OS=Homo sapiens]	0	FALSE	179.825	48	23	75	21	1	586	65.6	6.9	282.7	23	0	7009.8	6599.3	7678.9	7445.1	4606.8	4490.4		7009.8	7109.17	7421.99	7270.75	5226.14	5278.66	7059.49	7346.37	1.04064	5252.4	0.74402	0.897127	0.106753	FALSE
FALSE	High	Master Protein	Q9C0E2	Exportin-4 [OS=Homo sapiens]	0	FALSE	179.778	28	25	74	24	1	1151	130.1	5.05	259.99	25	1	5616	5436.8	6129.3	5973.3	5042.4	4807.8		5616	5856.85	5924.23	5833.42	5720.3	5651.77	5736.43	5878.83	1.02482	5686.04	0.991216	0.997036	0.946479	FALSE
FALSE	High	Master Protein	Q8TD19	Serine/threonine-protein kinase Nek9 [OS=Homo sapiens]	0	FALSE	179.497	29	22	72	22	1	979	107.1	5.74	261.72	22	0	7477.7	6916.8	8522.3	8537.6	4888.8	4797.7		7477.7	7451.2	8237.17	8337.66	5546.05	5639.9	7464.45	8287.42	1.11025	5592.97	0.749282	0.554042	0.114877	FALSE
FALSE	High	Master Protein	P30044-1	Peroxiredoxin-5, mitochondrial [OS=Homo sapiens]	0	FALSE	179.226	61	13	160	13	1	214	22.1	8.7	535.39	13	0	17116	16394.3	24391.1	24169.8	21157.1	20462		17116	17660.9	23575.1	23603.8	24001.4	24054	17388.5	23589.4	1.35661	24027.7	1.38182	0.0107158	0.0233144	TRUE
FALSE	High	Master Protein	Q7Z417	Nuclear fragile X mental retardation-interacting protein 2 [OS=Homo sapiens]	0	FALSE	179.207	47	22	94	22	1	695	76.1	8.7	314.99	22	0	10091.6	9023.9	9166.3	9090.4	11506.1	10673.9		10091.6	9721.1	8859.63	8877.52	13053	12547.6	9906.35	8868.57	0.895241	12800.3	1.29213	0.353993	0.0721815	FALSE
FALSE	High	Master Protein	Q8NFW8	N-acylneuraminate cytidylyltransferase [OS=Homo sapiens]	0	FALSE	179.1	47	21	102	21	1	434	48.3	7.93	347.35	21	0	12769.8	11423.1	14266.1	14262.5	11164.5	10934.5		12769.8	12305.7	13788.8	13928.5	12665.4	12854	12537.7	13858.7	1.10536	12759.7	1.0177	0.545348	0.938394	TRUE
FALSE	High	Master Protein	Q6IN85	Serine/threonine-protein phosphatase 4 regulatory subunit 3A [OS=Homo sapiens]	0	FALSE	179.08	32	29	83	17	1	833	95.3	4.94	269.86	29	0	4461.1	4090.5	5388.7	5319.1	3931.9	3855.2		4461.1	4406.54	5208.41	5194.54	4460.5	4531.95	4433.82	5201.47	1.17314	4496.23	1.01408	0.433691	0.782419	TRUE
FALSE	High	Master Protein	Q8IV38	Ankyrin repeat and MYND domain-containing protein 2 [OS=Homo sapiens]	0	FALSE	179.035	51	18	65	18	1	441	49.3	6.25	216.51	18	0	9856.6	9069.9	10418.6	9990.1	10049.5	9344.3		9856.6	9770.65	10070	9756.15	11400.5	10984.6	9813.63	9913.09	1.01014	11192.6	1.14051	0.997953	0.426734	TRUE
FALSE	High	Master Protein	Q9H4L7-2	Isoform 2 of SWI/SNF-related matrix-associated actin-dependent regulator of chromatin subfamily A containing DEAD/H box 1 [OS=Homo sapiens]	0	FALSE	178.976	25	23	58	23	1	1028	117.5	5.55	212.21	23	0	8319.4	7492.4	7650.3	7700.4	5938.1	5701.9		8319.4	8071.27	7394.35	7520.07	6736.41	6702.83	8195.34	7457.21	0.909933	6719.62	0.819932	0.429744	0.297232	TRUE
FALSE	High	Master Protein	Q9NVA2-2	Isoform 2 of Septin-11 [OS=Homo sapiens]	0	FALSE	178.909	43	20	80	9	1	439	50.8	7.01	304.83	20	1	3957.4	3653.8	4497.6	4310.9	3312.7	3159.3		3957.4	3936.1	4347.13	4209.95	3758.06	3713.89	3946.75	4278.54	1.08407	3735.98	0.946596	0.653087	0.904866	FALSE
FALSE	High	Master Protein	P32929	Cystathionine gamma-lyase [OS=Homo sapiens]	0	FALSE	178.79	53	17	90	17	1	405	44.5	6.7	313.49	17	0	10088.5	9099.3	8153.9	8422.5	7361.1	7193.3		10088.5	9802.32	7881.1	8225.26	8350.72	8456.03	9945.41	8053.18	0.809738	8403.38	0.84495	0.122165	0.274534	TRUE
FALSE	High	Master Protein	Q96HE7	ERO1-like protein alpha [OS=Homo sapiens]	0	FALSE	178.788	58	21	59	19	1	468	54.4	5.68	241.49	21	2	8559.1	8061.6	9824.8	9352	9631	8967.2		8559.1	8684.45	9496.1	9132.99	10925.8	10541.3	8621.77	9314.54	1.08035	10733.6	1.24494	0.678559	0.188147	TRUE
FALSE	High	Master Protein	O95747	Serine/threonine-protein kinase OSR1 [OS=Homo sapiens]	0	FALSE	178.773	35	20	109	17	1	527	58	6.43	363.76	20	7	9878.9	9305.2	11544.9	11371.8	9604.4	9248.6		9878.9	10024.1	11158.6	11105.5	10895.6	10872.1	9951.52	11132.1	1.11863	10883.9	1.09369	0.521266	0.574776	TRUE
FALSE	High	Master Protein	Q9NSV4-3	Protein diaphanous homolog 3 [OS=Homo sapiens]	0	FALSE	178.673	29	30	81	3	1	1193	136.8	7.03	272.12	30	28	8657.2	8017.9	10598.2	10375.5	7477.1	7149		8657.2	8637.37	10243.6	10132.5	8482.32	8403.96	8647.29	10188.1	1.17818	8443.14	0.976391	0.319989	0.968576	FALSE
FALSE	High	Master Protein	Q9NQT8	Kinesin-like protein KIF13B [OS=Homo sapiens]	0	FALSE	178.596	19	31	75	27	1	1826	202.7	5.88	240.53	31	4	8890.1	8178.1	8979.2	8862.2	9530.6	8921.7		8890.1	8809.95	8678.79	8654.66	10811.9	10487.8	8850.03	8666.72	0.979288	10649.9	1.20337	0.802026	0.26761	FALSE
FALSE	High	Master Protein	P30042-1	ES1 protein homolog, mitochondrial [OS=Homo sapiens]	0	FALSE	178.587	62	16	67	16	1	268	28.2	8.27	304.02	16	0	9850.6	9230.5	13896.2	13974.2	6806.5	6823.3		9850.6	9943.66	13431.3	13646.9	7721.56	8021.08	9897.13	13539.1	1.36798	7871.32	0.795314	0.035898	0.223794	FALSE
FALSE	High	Master Protein	P53582	Methionine aminopeptidase 1 [OS=Homo sapiens]	0	FALSE	178.478	46	13	81	13	1	386	43.2	7.17	334.3	13	0	8212.9	7577.6	8782	8801.5	9005.6	8531.7		8212.9	8163.06	8488.18	8595.38	10216.3	10029.4	8187.98	8541.78	1.04321	10122.8	1.23631	0.846005	0.203019	TRUE
FALSE	High	Master Protein	Q16851	UTP--glucose-1-phosphate uridylyltransferase [OS=Homo sapiens]	0	FALSE	178.03	49	25	112	25	1	508	56.9	8.15	384.45	25	0	13182.2	12045.2	10601.2	10312.8	12125.6	11365.5		13182.2	12975.8	10246.5	10071.3	13755.8	13360.6	13079	10158.9	0.776733	13558.2	1.03664	0.0600735	0.844612	FALSE
FALSE	High	Master Protein	P17812	CTP synthase 1 [OS=Homo sapiens]	0	FALSE	177.858	49	26	103	24	1	591	66.6	6.46	346.97	26	2	12442	11583.8	11775.3	11598.7	9506.8	9079.4		12442	12478.8	11381.3	11327.1	10784.9	10673.2	12460.4	11354.2	0.911224	10729.1	0.861053	0.424701	0.335226	TRUE
FALSE	High	Master Protein	P50579-2	Isoform 2 of Methionine aminopeptidase 2 [OS=Homo sapiens]	0	FALSE	177.843	53	20	85	2	1	455	50.5	5.35	312.62	20	0	706.4	630.4	755.9	720.8	608.4	543.8		706.4	679.106	730.61	703.92	690.193	639.26	692.753	717.265	1.03538	664.727	0.959544	0.943696	0.925576	FALSE
FALSE	High	Master Protein	Q9Y4E6-1	WD repeat-containing protein 7 [OS=Homo sapiens]	0	FALSE	177.827	27	34	61	34	1	1490	163.7	6.92	214.87	34	0	5156.5	4777.8	5468.7	5385.9	4417.5	4172.8		5156.5	5146.94	5285.74	5259.77	5011.39	4905.31	5151.72	5272.75	1.02349	4958.35	0.962464	0.99655	0.916107	FALSE
FALSE	High	Master Protein	Q9UPT8	Zinc finger CCCH domain-containing protein 4 [OS=Homo sapiens]	0	FALSE	177.718	33	24	61	24	1	1303	140.2	6.27	245	24	0	6141	5577.5	6214.1	6051.5	5161.8	5041.2		6141	6008.42	6006.2	5909.78	5855.75	5926.15	6074.71	5957.99	0.980786	5890.95	0.969749	0.763374	0.956091	TRUE
FALSE	High	Master Protein	Q9NS87	Kinesin-like protein KIF15 [OS=Homo sapiens]	0	FALSE	177.684	21	27	58	27	1	1388	160.1	6	226.35	27	0	9065.9	8260	8537.8	8463.7	8275.4	7843.7		9065.9	8898.18	8252.15	8265.49	9387.94	9220.61	8982.04	8258.82	0.919482	9304.27	1.03588	0.473023	0.785305	FALSE
FALSE	High	Master Protein	Q96JM3	Chromosome alignment-maintaining phosphoprotein 1 [OS=Homo sapiens]	0	FALSE	177.647	40	29	81	29	1	812	89	8.44	268.97	29	0	9271.3	8331.3	10009.7	10066.4	5735	5615.2		9271.3	8974.99	9674.81	9830.66	6506.01	6600.91	9123.14	9752.74	1.06901	6553.46	0.718333	0.728449	0.0782498	FALSE
FALSE	High	Master Protein	Q3V6T2-1	Girdin [OS=Homo sapiens]	0	FALSE	177.626	23	39	68	39	1	1871	215.9	6.21	225.7	39	0	9494.5	8839.2	10627.9	10531.6	8324.7	7995.4		9494.5	9522.13	10272.3	10285	9443.87	9398.94	9508.31	10278.6	1.08102	9421.4	0.990859	0.675672	0.961968	FALSE
FALSE	High	Master Protein	Q8N392-1	Rho GTPase-activating protein 18 [OS=Homo sapiens]	0	FALSE	177.561	42	22	57	22	1	663	74.9	6.44	223.32	22	0	6886.9	6417.4	7256.8	7163.5	4724.5	4519.2		6886.9	6913.22	7014.01	6995.74	5359.66	5312.51	6900.06	7004.88	1.01519	5336.09	0.773339	0.997538	0.15836	FALSE
FALSE	High	Master Protein	O15347	High mobility group protein B3 [OS=Homo sapiens]	0	FALSE	177.296	59	17	104	17	1	200	23	8.37	376.51	17	0	13388.5	12352.5	12679.6	12729.2	10097.5	9958.2		13388.5	13306.9	12255.4	12431.1	11455	11706.3	13347.7	12343.2	0.924748	11580.6	0.867615	0.459325	0.315653	TRUE
FALSE	High	Master Protein	P68036	Ubiquitin-conjugating enzyme E2 L3 [OS=Homo sapiens]	0	FALSE	177.162	77	13	134	12	1	154	17.9	8.51	558.45	13	1	22079.7	21198.6	23374.2	23940.2	22075.8	21612		22079.7	22836.4	22592.2	23379.6	25043.7	25405.8	22458.1	22985.9	1.0235	25224.7	1.12319	0.839391	0.539595	TRUE
FALSE	High	Master Protein	Q14558-2	Isoform 2 of Phosphoribosyl pyrophosphate synthase-associated protein 1 [OS=Homo sapiens]	0	FALSE	177.082	55	16	94	13	1	385	42.4	8.47	357.91	16	0	5736.8	5475.8	7131.2	6822	4970.5	4882		5736.8	5898.87	6892.61	6662.24	5638.73	5739	5817.83	6777.43	1.16494	5688.87	0.977832	0.455804	0.999582	FALSE
FALSE	High	Master Protein	Q02750	Dual specificity mitogen-activated protein kinase kinase 1 [OS=Homo sapiens]	0	FALSE	176.993	46	21	119	12	1	393	43.4	6.62	383.61	21	0	6247.6	5807.5	6478.8	6277.6	5164.2	4891		6247.6	6256.19	6262.04	6130.59	5858.47	5749.58	6251.9	6196.32	0.99111	5804.03	0.928362	0.859482	0.733332	TRUE
FALSE	High	Master Protein	O43426	Synaptojanin-1 [OS=Homo sapiens]	0	FALSE	176.968	25	28	78	28	1	1573	173	7.42	273.17	28	0	6755	6421.5	5828.2	5682.4	8582.1	8182.6		6755	6917.63	5633.21	5549.33	9735.87	9619	6836.32	5591.27	0.817877	9677.43	1.41559	0.151885	0.0301566	FALSE
FALSE	High	Master Protein	P54132	Bloom syndrome protein [OS=Homo sapiens]	0	FALSE	176.864	27	33	76	32	1	1417	158.9	7.49	235.72	33	1	11030.4	9933.9	9843.2	9666.1	7199.7	7150.4		11030.4	10701.4	9513.88	9439.74	8167.62	8405.6	10865.9	9476.81	0.87216	8286.61	0.762625	0.265899	0.0797089	TRUE
FALSE	High	Master Protein	Q7Z3T8	Zinc finger FYVE domain-containing protein 16 [OS=Homo sapiens]	0	FALSE	176.787	20	24	68	24	1	1539	168.8	4.82	245.43	24	0	6852.7	6301.7	6877.1	6968.5	6882.1	6616.7		6852.7	6788.58	6647.02	6805.31	7807.33	7778.21	6820.64	6726.16	0.986149	7792.77	1.14253	0.830178	0.324532	FALSE
FALSE	High	Master Protein	Q9P0K7-2	Isoform 2 of Ankycorbin [OS=Homo sapiens]	0	FALSE	176.629	31	28	66	28	1	983	110.4	6.11	233.51	28	0	7824.4	7229	8325	8302.4	6930.7	6683.4		7824.4	7787.52	8046.47	8107.97	7862.46	7856.62	7805.96	8077.22	1.03475	7859.54	1.00686	0.92027	0.824042	TRUE
FALSE	High	Master Protein	Q9Y6M1	Insulin-like growth factor 2 mRNA-binding protein 2 [OS=Homo sapiens]	0	FALSE	176.578	36	21	221	19	1	599	66.1	8.46	682.67	21	0	11528.6	10415.3	12582.9	12484.9	7448.3	7189.1		11528.6	11220	12161.9	12192.5	8449.65	8451.1	11374.3	12177.2	1.07059	8450.37	0.742935	0.683956	0.0561127	FALSE
FALSE	High	Master Protein	O95486-1	Protein transport protein Sec24A [OS=Homo sapiens]	0	FALSE	176.265	22	21	59	17	1	1093	119.7	7.66	222.69	21	0	7124.9	6856	5752	5760.8	7200.6	6855.7		7124.9	7385.7	5559.56	5625.89	8168.64	8059.17	7255.3	5592.72	0.770847	8113.91	1.11834	0.0784645	0.493912	FALSE
FALSE	High	Master Protein	Q969X6	U3 small nucleolar RNA-associated protein 4 homolog [OS=Homo sapiens]	0	FALSE	176.258	40	23	75	23	1	686	76.8	8.85	276.21	23	0	10987.9	10030.1	8173.2	8064.5	6368.2	6333.3		10987.9	10805	7899.75	7875.64	7224.34	7445.07	10896.5	7887.7	0.723877	7334.7	0.673126	0.0282568	0.0374657	TRUE
FALSE	High	Master Protein	Q4V328	GRIP1-associated protein 1 [OS=Homo sapiens]	0	FALSE	176.188	38	24	64	24	1	841	95.9	5.11	236.26	24	0	8037.2	7613.9	9170.2	9092.9	7800	7427.5		8037.2	8202.16	8863.4	8879.96	8848.63	8731.34	8119.68	8871.68	1.09261	8789.99	1.08255	0.626159	0.613252	TRUE
FALSE	High	Master Protein	Q92890-1	Isoform Long of Ubiquitin recognition factor in ER-associated degradation protein 1 [OS=Homo sapiens]	0	FALSE	176.071	52	17	138	17	1	343	38.7	6.34	439.21	17	0	8618.1	7947.8	12329.3	11996.3	8960.1	8528.2	Acetyl [N-Term]	8618.1	8561.86	11916.8	11715.4	10164.7	10025.3	8589.98	11816.1	1.37557	10095	1.1752	0.0322583	0.333061	TRUE
FALSE	High	Master Protein	Q9UPQ9	Trinucleotide repeat-containing gene 6B protein [OS=Homo sapiens]	0	FALSE	176.045	24	25	50	25	1	1833	193.9	6.76	178.05	25	0	4608.3	4219.2	4087.8	3911.8	3539.5	3331.9		4608.3	4545.18	3951.04	3820.19	4015.35	3916.79	4576.74	3885.61	0.848992	3966.07	0.866571	0.299486	0.476749	TRUE
FALSE	High	Master Protein	P57740	Nuclear pore complex protein Nup107 [OS=Homo sapiens]	0	FALSE	176.015	34	24	81	24	1	925	106.3	5.43	293.68	24	0	10812.6	10149.4	10458.5	9987.7	9694.5	9446.3		10812.6	10933.6	10108.6	9753.8	10997.8	11104.5	10873.1	9931.2	0.913375	11051.2	1.01638	0.43481	0.861011	FALSE
FALSE	High	Master Protein	P53602	Diphosphomevalonate decarboxylase [OS=Homo sapiens]	0	FALSE	175.729	46	18	81	18	1	400	43.4	7.23	311.34	18	0	9519.8	8753.3	9522.3	9583.2	9646.8	9356.7		9519.8	9429.59	9203.72	9358.78	10943.7	10999.2	9474.7	9281.25	0.979583	10971.5	1.15797	0.803858	0.377802	FALSE
FALSE	High	Master Protein	Q9Y6J0	Calcineurin-binding protein cabin-1 [OS=Homo sapiens]	0	FALSE	175.666	18	32	68	32	1	2220	246.2	6.02	216.72	32	0	5752.9	5275.9	5513	5303.5	5026.5	4986		5752.9	5683.52	5328.55	5179.3	5702.26	5861.26	5718.21	5253.93	0.918806	5781.76	1.01111	0.464367	0.868036	FALSE
FALSE	High	Master Protein	P31942	Heterogeneous nuclear ribonucleoprotein H3 [OS=Homo sapiens]	0	FALSE	175.485	68	17	200	2	1	346	36.9	6.87	711.41	17	19	16814.4	15613.6	16802.4	16306.7	14585	14254.2		16814.4	16819.9	16240.3	15924.8	16545.8	16756.4	16817.2	16082.5	0.956317	16651.1	0.990126	0.670573	0.911541	TRUE
FALSE	High	Master Protein	Q04917	14-3-3 protein eta [OS=Homo sapiens]	0	FALSE	175.403	67	19	160	14	1	246	28.2	4.84	548.33	19	1	13510.7	11833.9	7156.7	6926.6	11496.9	10720.5		13510.7	12748.2	6917.26	6764.39	13042.5	12602.4	13129.5	6840.83	0.521029	12822.5	0.976619	0.000195715	0.834077	TRUE
FALSE	High	Master Protein	Q9UJX3-1	Anaphase-promoting complex subunit 7 [OS=Homo sapiens]	0	FALSE	175.337	46	25	101	25	1	599	66.8	5.64	276.74	25	0	13863.6	12339.9	12991.2	12918.8	9496.3	9245.4		13863.6	13293.3	12556.6	12616.3	10773	10868.4	13578.4	12586.4	0.92694	10820.7	0.7969	0.472689	0.139483	TRUE
FALSE	High	Master Protein	P24941-1	cyclin-dependent kinase 2 [OS=Homo sapiens]	0	FALSE	175.336	64	19	106	17	1	298	33.9	8.68	356.48	19	0	8882.5	8162.4	8660	8451.5	5736.8	5494.1		8882.5	8793.04	8370.27	8253.58	6508.05	6458.55	8837.77	8311.92	0.9405	6483.3	0.73359	0.573591	0.0983246	TRUE
FALSE	High	Master Protein	P52888	thimet oligopeptidase [OS=Homo sapiens]	0	FALSE	174.96	41	29	93	29	1	689	78.8	6.05	310.16	29	0	14100.2	12858.9	13133.4	13062.5	12209.8	11622.4		14100.2	13852.4	12694	12756.6	13851.3	13662.6	13976.3	12725.3	0.910491	13757	0.984306	0.37776	0.878015	TRUE
FALSE	High	Master Protein	Q9HC35	Echinoderm microtubule-associated protein-like 4 [OS=Homo sapiens]	0	FALSE	174.817	30	28	91	28	1	981	108.8	6.4	275.9	28	0	11623.3	10650.9	12270.1	12093.3	10168	9678.8		11623.3	11473.8	11859.6	11810.1	11535	11377.8	11548.6	11834.8	1.02479	11456.4	0.992022	0.883415	0.922498	FALSE
FALSE	High	Master Protein	Q92576-1	PHD finger protein 3 [OS=Homo sapiens]	0	FALSE	174.699	17	31	69	30	1	2039	229.3	6.96	211.22	31	0	8326.1	7458.1	9063.5	8779.9	6494.4	6394.6		8326.1	8034.32	8760.27	8574.29	7367.5	7517.13	8180.21	8667.28	1.05954	7442.31	0.909795	0.771013	0.684121	FALSE
FALSE	High	Master Protein	Q13573	SNW domain-containing protein 1 [OS=Homo sapiens]	0	FALSE	174.694	52	25	124	25	1	536	61.5	9.52	373.77	25	0	13673	12254.1	13070.7	13042.1	10873.3	10519.2		13673	13200.9	12633.4	12736.7	12335.1	12365.8	13436.9	12685	0.944043	12350.4	0.919141	0.583912	0.529919	TRUE
FALSE	High	Master Protein	Q9NVU0	DNA-directed RNA polymerase III subunit RPC5 [OS=Homo sapiens]	0	FALSE	174.654	44	28	74	28	1	708	79.8	6.47	244.1	28	0	8105.2	7583.5	8519.3	8367.6	7569.7	7203.6		8105.2	8169.41	8234.27	8171.64	8587.37	8468.14	8137.31	8202.96	1.00807	8527.75	1.04798	0.960874	0.739245	TRUE
FALSE	High	Master Protein	Q5T3J3	Ligand-dependent nuclear receptor-interacting factor 1 [OS=Homo sapiens]	0	FALSE	174.633	41	23	65	23	1	769	84.5	9.72	251.32	23	0	5511.7	5085.5	5270.7	5078.7	5399.3	5262.6		5511.7	5478.41	5094.36	4959.77	6125.18	6186.41	5495.06	5027.06	0.914834	6155.8	1.12024	0.447689	0.389857	FALSE
FALSE	High	Master Protein	P04183	Thymidine kinase, cytosolic [OS=Homo sapiens]	0	FALSE	174.566	64	17	160	17	1	234	25.5	8.51	483.51	17	0	17130.9	16046.5	18951.8	18478	12535.7	12006.1		17130.9	17286.3	18317.7	18045.3	14221	14113.7	17208.6	18181.5	1.05654	14167.3	0.823271	0.743549	0.184703	FALSE
FALSE	High	Master Protein	Q6UWE0	E3 ubiquitin-protein ligase LRSAM1 [OS=Homo sapiens]	0	FALSE	174.229	36	20	50	20	1	723	83.5	5.94	207.57	20	0	6890.1	6604.6	8054.8	7845.5	5340.3	5204.1		6890.1	7114.88	7785.31	7661.77	6058.25	6117.64	7002.49	7723.54	1.10297	6087.94	0.869397	0.661071	0.488589	FALSE
FALSE	High	Master Protein	Q99856	AT-rich interactive domain-containing protein 3A [OS=Homo sapiens]	0	FALSE	174.172	43	18	74	17	1	593	62.9	4.91	257.6	18	1	6194.7	5629	5393.8	5406	7135.8	6828.2		6194.7	6063.9	5213.34	5279.4	8095.13	8026.84	6129.3	5246.37	0.855949	8060.99	1.31516	0.242649	0.0955876	FALSE
FALSE	High	Master Protein	Q69YN4	protein virilizer homolog [OS=Homo sapiens]	0	FALSE	174.167	23	36	79	36	1	1812	201.9	5.01	256.47	36	0	8460.7	7854.6	9983	9746.5	7540	7251.3		8460.7	8461.46	9649	9518.25	8553.67	8524.21	8461.08	9583.63	1.13267	8538.94	1.0092	0.468667	0.889246	TRUE
FALSE	High	Master Protein	Q9Y4W2	Ribosomal biogenesis protein LAS1L [OS=Homo sapiens]	0	FALSE	173.886	37	20	57	20	1	734	83	4.73	213.11	20	0	7139.8	6540.9	5976.1	5758.1	5532.4	5442.8		7139.8	7046.26	5776.16	5623.25	6276.17	6398.24	7093.03	5699.71	0.803565	6337.21	0.893442	0.125437	0.601321	TRUE
FALSE	High	Master Protein	P62910	60S ribosomal protein L32 [OS=Homo sapiens]	0	FALSE	173.874	47	11	235	11	1	135	15.9	11.33	632.46	11	0	25777.1	23272	24430.2	25376.8	22209.3	21458.5		25777.1	25070	23612.9	24782.5	25195.1	25225.4	25423.6	24197.7	0.951782	25210.2	0.99161	0.661734	0.715696	TRUE
FALSE	High	Master Protein	P00492	Hypoxanthine-guanine phosphoribosyltransferase [OS=Homo sapiens]	0	FALSE	173.852	80	14	185	13	1	218	24.6	6.68	463.05	14	1	14149.6	13323	16392.2	16225.5	12039.7	11484.3		14149.6	14352.4	15843.8	15845.5	13658.3	13500.3	14251	15844.6	1.11183	13579.3	0.952868	0.521162	0.702112	FALSE
FALSE	High	Master Protein	Q8IXT5	RNA-binding protein 12B [OS=Homo sapiens]	0	FALSE	173.529	44	35	94	35	1	1001	118	6.81	260.39	35	0	8999.8	7969.7	9795.9	9569.3	7049.6	6921.5		8999.8	8585.45	9468.16	9345.2	7997.34	8136.52	8792.62	9406.68	1.06984	8066.93	0.917466	0.724766	0.60894	FALSE
FALSE	High	Master Protein	Q96DI7	U5 small nuclear ribonucleoprotein 40 kDa protein [OS=Homo sapiens]	0	FALSE	173.452	56	18	76	18	1	357	39.3	8.1	305.42	18	0	6597.7	6139.4	6750.9	6531.2	5444.7	5271.6		6597.7	6613.74	6525.04	6378.25	6176.68	6196.99	6605.72	6451.64	0.976676	6186.84	0.936588	0.774909	0.82793	TRUE
FALSE	High	Master Protein	O15020	Spectrin beta chain, non-erythrocytic 2 [OS=Homo sapiens]	0	FALSE	173.327	16	37	63	28	1	2390	271.2	6.11	193.69	37	1	4933.2	4699.5	5004.4	4844.1	3467.6	3384.2		4933.2	5062.59	4836.97	4730.66	3933.78	3978.27	4997.89	4783.81	0.957166	3956.03	0.791539	0.751448	0.205287	TRUE
FALSE	High	Master Protein	P36507	Dual specificity mitogen-activated protein kinase kinase 2 [OS=Homo sapiens]	0	FALSE	173.308	55	24	103	15	1	400	44.4	6.55	295.89	24	9	12297.1	11300.6	11338.8	10905.5	10857.5	9997.9		12297.1	12173.7	10959.4	10650.1	12317.2	11753	12235.4	10804.8	0.883075	12035.1	0.983627	0.305483	0.874116	TRUE
FALSE	High	Master Protein	Q8IY67	Ribonucleoprotein PTB-binding 1 [OS=Homo sapiens]	0	FALSE	173.291	46	20	79	2	1	606	63.8	8.48	298.68	20	0	472.1	421.7	348.8	330.3	413.4	372.5		472.1	454.281	337.13	322.565	468.977	437.89	463.191	329.848	0.712121	453.433	0.978935	0.0936997	0.956705	TRUE
FALSE	High	Master Protein	Q9Y5Q8-1	general transcription factor 3C polypeptide 5 [OS=Homo sapiens]	0	FALSE	173.167	45	24	69	1	1	519	59.5	6.9	235.97	24	0	600.2	566.3	621.8	583.7	526.5	515.6		600.2	610.053	600.997	570.031	597.282	606.11	605.127	585.514	0.967589	601.696	0.994331	0.761565	0.944811	TRUE
FALSE	High	Master Protein	Q9Y4G6	Talin-2 [OS=Homo sapiens]	0	FALSE	173.14	7	23	123	1	1	2542	271.4	5.57	414.61	23	0	260	224.4	216.1	225.6	191.7	184.5		260	241.737	208.87	220.317	217.472	216.888	250.869	214.593	0.855401	217.18	0.865711	0.424124	0.708094	TRUE
FALSE	High	Master Protein	Q03164-3	Isoform 3 of Histone-lysine N-methyltransferase 2A [OS=Homo sapiens]	0	FALSE	173.068	10	32	62	28	1	3972	431.8	9.07	189.43	32	0	3797.6	3556.4	4024.7	3919.4	3382.5	3351.9		3797.6	3831.17	3890.05	3827.61	3837.24	3940.3	3814.39	3858.83	1.01165	3888.77	1.0195	0.968591	0.76009	TRUE
FALSE	High	Master Protein	O75521	Enoyl-CoA delta isomerase 2, mitochondrial [OS=Homo sapiens]	0	FALSE	173.047	44	14	81	14	1	394	43.6	9	303.38	14	0	10430.7	9886.9	12364	12294.5	8784.2	8581.2		10430.7	10650.8	11950.3	12006.6	9965.14	10087.6	10540.7	11978.5	1.1364	10026.4	0.951201	0.434655	0.809355	FALSE
FALSE	High	Master Protein	P19174-2	Isoform 2 of 1-phosphatidylinositol 4,5-bisphosphate phosphodiesterase gamma-1 [OS=Homo sapiens]	0	FALSE	172.849	25	28	60	28	1	1291	148.6	6.05	191.69	28	0	8679.5	7992.2	7793.8	7614.1	5340.2	5166.3		8679.5	8609.69	7533.05	7435.79	6058.13	6073.21	8644.59	7484.42	0.865792	6065.67	0.701672	0.261547	0.0602762	TRUE
FALSE	High	Master Protein	Q6UB35-1	Monofunctional C1-tetrahydrofolate synthase, mitochondrial [OS=Homo sapiens]	0	FALSE	172.74	27	23	64	23	1	978	105.7	8.06	221.21	23	0	7544.9	7105.2	6888.3	6987.1	6127	6147.6		7544.9	7654.16	6657.84	6823.47	6950.71	7226.77	7599.53	6740.66	0.886984	7088.74	0.932787	0.335639	0.807044	TRUE
FALSE	High	Master Protein	Q13523	Serine/threonine-protein kinase PRP4 homolog [OS=Homo sapiens]	0	FALSE	172.732	29	29	100	28	1	1007	116.9	10.26	298.24	29	1	13456.7	12107.8	12082.6	11999.4	11957.3	11607.2		13456.7	13043.3	11678.4	11718.4	13564.8	13644.8	13250	11698.4	0.882898	13604.8	1.02678	0.304808	0.89326	FALSE
FALSE	High	Master Protein	Q15003	Condensin complex subunit 2 [OS=Homo sapiens]	0	FALSE	172.668	39	22	52	22	1	741	82.5	5.06	198.99	22	0	9043.8	8025.4	8416.6	8280.5	6398.1	6147.3		9043.8	8645.45	8135.01	8086.58	7258.26	7226.41	8844.63	8110.8	0.917031	7242.34	0.81884	0.46169	0.293667	TRUE
FALSE	High	Master Protein	Q13724-1	Mannosyl-oligosaccharide glucosidase [OS=Homo sapiens]	0	FALSE	172.57	27	18	82	18	1	837	91.9	8.9	304.75	18	0	7126	6747.5	8563	8448.5	7236.9	6916.9		7126	7268.82	8276.51	8250.65	8209.82	8131.11	7197.41	8263.58	1.14813	8170.47	1.1352	0.507705	0.442346	TRUE
FALSE	High	Master Protein	Q99543-1	dnaJ homolog subfamily C member 2 [OS=Homo sapiens]	0	FALSE	172.532	39	23	68	23	1	621	72	8.7	261.44	23	0	13511.2	12333.9	11771.7	11683.7	8922.5	8493.5		13511.2	13286.8	11377.9	11410.1	10122	9984.47	13399	11394	0.850359	10053.3	0.750298	0.197765	0.0641464	TRUE
FALSE	High	Master Protein	Q9P0L0	vesicle-associated membrane protein-associated protein A [OS=Homo sapiens]	0	FALSE	172.532	71	17	94	1	1	249	27.9	8.62	302.9	17	0	1336.8	1273.7	1809.2	1853.5	1479	1359.9		1336.8	1372.11	1748.67	1810.09	1677.84	1598.62	1354.45	1779.38	1.31373	1638.23	1.20951	0.123852	0.219899	TRUE
FALSE	High	Master Protein	Q13356-2	Isoform 2 of Peptidyl-prolyl cis-trans isomerase-like 2 [OS=Homo sapiens]	0	FALSE	172.092	45	21	76	1	1	527	59.4	8.75	259.1	21	0	90.4	94.5	92.1	114.1	77.7	83.6		90.4	101.801	89.0187	111.428	88.1459	98.2754	96.1006	100.223	1.0429	93.2107	0.969928	0.940072	0.946027	FALSE
FALSE	High	Master Protein	Q53H82	Endoribonuclease LACTB2 [OS=Homo sapiens]	0	FALSE	171.995	61	16	73	16	1	288	32.8	6.8	276.18	16	0	6303	5777.3	7779.1	7736.6	4938.7	4793.5		6303	6223.66	7518.84	7555.42	5602.66	5634.96	6263.33	7537.13	1.20337	5618.81	0.897096	0.349073	0.57788	FALSE
FALSE	High	Master Protein	Q5VT06	Centrosome-associated protein 350 [OS=Homo sapiens]	0	FALSE	171.872	12	34	64	33	1	3117	350.7	6.33	223.67	34	1	7190.9	6698.6	8989.1	8608.5	6329.6	6160.1		7190.9	7216.14	8688.36	8406.9	7180.55	7241.46	7203.52	8547.63	1.18659	7211	1.00104	0.296329	0.849627	TRUE
FALSE	High	Master Protein	P67775	Serine/threonine-protein phosphatase 2A catalytic subunit alpha isoform [OS=Homo sapiens]	0	FALSE	171.781	61	15	103	1	1	309	35.6	5.54	389.42	15	0	921.5	843	933.1	911.1	793	771.8		921.5	908.131	901.882	889.764	899.61	907.284	914.816	895.823	0.979238	903.447	0.987573	0.850324	0.837645	TRUE
FALSE	High	Master Protein	P38117	electron transfer flavoprotein subunit beta [OS=Homo sapiens]	0	FALSE	171.654	63	18	128	18	1	255	27.8	8.1	447.58	18	0	17775.3	16615.6	19740.5	20016.8	14559.6	14883.8		17775.3	17899.3	19080.1	19548	16517	17496.5	17837.3	19314	1.08279	17006.8	0.953437	0.63377	0.705189	FALSE
FALSE	High	Master Protein	Q9H2U2	Inorganic pyrophosphatase 2, mitochondrial [OS=Homo sapiens]	0	FALSE	171.387	60	19	91	18	1	334	37.9	7.39	327.99	19	0	10030.3	9329.5	11647.8	11840	6214.3	6156.3		10030.3	10050.3	11258.1	11562.7	7049.75	7236.99	10040.3	11410.4	1.13646	7143.37	0.71147	0.454994	0.0703769	FALSE
FALSE	High	Master Protein	Q15398	Disks large-associated protein 5 [OS=Homo sapiens]	0	FALSE	171.314	33	24	60	24	1	846	95.1	9	198.3	24	0	5992.5	5643.7	5903.4	5745.1	4678.3	4484.6		5992.5	6079.74	5705.89	5610.56	5307.25	5271.84	6036.12	5658.23	0.937395	5289.54	0.876315	0.546825	0.483985	TRUE
FALSE	High	Master Protein	Q9BQS8-4	Isoform 4 of FYVE and coiled-coil domain-containing protein 1 [OS=Homo sapiens]	0	FALSE	171.297	22	30	64	29	1	1498	168.8	4.93	211.24	30	0	7626.5	7044.6	10583.2	10376.6	9043.1	8667.9		7626.5	7588.87	10229.1	10133.6	10258.8	10189.5	7607.69	10181.4	1.3383	10224.2	1.34393	0.0519146	0.0702558	TRUE
FALSE	High	Master Protein	Q9NZ08-2	Isoform 2 of Endoplasmic reticulum aminopeptidase 1 [OS=Homo sapiens]	0	FALSE	171.282	29	25	63	25	1	948	107.8	6.28	221.99	25	0	9507.1	8756.6	14746.3	14214.9	8539.6	8160.6		9507.1	9433.15	14252.9	13882	9687.66	9593.14	9470.12	14067.5	1.48546	9640.4	1.01798	0.00567389	0.854738	TRUE
FALSE	High	Master Protein	Q9UKN8	General transcription factor 3C polypeptide 4 [OS=Homo sapiens]	0	FALSE	171.241	36	25	76	25	1	822	91.9	6.65	267.98	25	0	8270.6	9094.1	8008.8	7829.2	7392.7	7721		8270.6	9796.72	7740.85	7645.85	8386.57	9076.37	9033.66	7693.35	0.851632	8731.47	0.966548	0.218847	0.905852	TRUE
[truncated: 7,091 more rows]
