# Supplementary material for: RBM17 Mediates Evasion of Pro-Leukemic Factors from Splicing-coupled NMD to Enforce Leukemic Stem Cell Maintenance
Source: Research Square preprint supplement (doi:10.21203/rs.3.rs-728533/v1), 2021-07-27
Supplement: Supplementary file 3 [file 345835ec492807faefde719a.xlsx]

## Sheet: Change in Transc BioType
GeneID	Description	geneSymbol	chr	strand	exonStart_0base	exonEnd	FDR	deltaPSI	Exon Skipping/Retention	ShRBM17_TRANSCRIPT BIOTYPE	Control_TRANSCRIPT BIOTYPE	Possible Exon type
ENSG00000171861	mitochondrial rRNA methyltransferase 3	MRM3	chr17	+	783082	783327	0.0229787	0.096	Skipped in ShRBM17	nonsense_mediated_decay	protein_coding	Essential Exon
ENSG00000115657	ATP binding cassette subfamily B member 6 (Langereis blood group)	ABCB6	chr2	-	219215996	219216180	0.0554922	0.088	Skipped in ShRBM17	nonsense_mediated_decay	protein_coding	Essential Exon
ENSG00000071243	inhibitor of growth family member 3	ING3	chr7	+	120964741	120964838	0.0695392	0.177	Skipped in ShRBM17	nonsense_mediated_decay	protein_coding	Essential Exon
ENSG00000145723	gypsy retrotransposon integrase 1	GIN1	chr5	-	103106715	103106909	0.0630369	0.142	Skipped in ShRBM17	nonsense_mediated_decay	protein_coding	Essential Exon
ENSG00000087085	acetylcholinesterase (Cartwright blood group)	ACHE	chr7	-	100892333	100892818	0.0949111	0.155	Skipped in ShRBM17	nonsense_mediated_decay	protein_coding	Essential Exon
ENSG00000132740	immunoglobulin mu DNA binding protein 2	IGHMBP2	chr11	+	68906068	68906384	0.0913472	0.191	Skipped in ShRBM17	nonsense_mediated_decay	protein_coding	Essential Exon
ENSG00000166747	adaptor related protein complex 1 subunit gamma 1	AP1G1	chr16	-	71808014	71808150	0.0571866	0.274	Skipped in ShRBM17	nonsense_mediated_decay	protein_coding	Essential Exon
ENSG00000153207	AT-hook containing transcription factor 1	AHCTF1	chr1	-	246843794	246843928	0.00481761	0.122	Skipped in ShRBM17	nonsense_mediated_decay	protein_coding	Essential Exon
ENSG00000060971	acetyl-CoA acyltransferase 1	ACAA1	chr3	-	38133951	38134009	0.075088	0.06	Skipped in ShRBM17	nonsense_mediated_decay	protein_coding	Essential Exon
ENSG00000144524	COP9 signalosome subunit 7B	COPS7B	chr2	+	231791732	231791808	0.0679128	0.106	Skipped in ShRBM17	nonsense_mediated_decay	protein_coding	Essential Exon
ENSG00000171103	tRNA methyltransferase 61B	TRMT61B	chr2	-	28851071	28851298	0.0641209	0.095	Skipped in ShRBM17	nonsense_mediated_decay	protein_coding	Essential Exon
ENSG00000028203	vezatin, adherens junctions transmembrane protein	VEZT	chr12	+	95298861	95298943	0.0237438	-0.173	Retained ShRBM17	nonsense_mediated_decay	processed_transcript
ENSG00000205581	high mobility group nucleosome binding domain 1	HMGN1	chr21	-	39347378	39347478	0.0881093	-0.242	Retained ShRBM17	nonsense_mediated_decay	processed_transcript
ENSG00000131051	RNA binding motif protein 39	RBM39	chr20	-	35740524	35740597	0.0617054	-0.075	Retained ShRBM17	nonsense_mediated_decay	protein_coding	Poison Exon
ENSG00000115020	phosphoinositide kinase, FYVE-type zinc finger containing	PIKFYVE	chr2	+	208276711	208276830	0.0114545	-0.245	Retained ShRBM17	nonsense_mediated_decay	protein_coding	Poison Exon
ENSG00000105879	Cbl proto-oncogene like 1	CBLL1	chr7	+	107752544	107752617	0.0442135	-0.062	Retained ShRBM17	nonsense_mediated_decay	protein_coding	Poison Exon
ENSG00000122643	5'-nucleotidase, cytosolic IIIA	NT5C3A	chr7	-	33035933	33035988	0.0132265	-0.196	Retained ShRBM17	nonsense_mediated_decay	protein_coding	Poison Exon
ENSG00000111275	aldehyde dehydrogenase 2 family member	ALDH2	chr12	+	111775604	111775720	0.0699155	-0.064	Retained ShRBM17	nonsense_mediated_decay	protein_coding	Poison Exon
ENSG00000156976	eukaryotic translation initiation factor 4A2	EIF4A2	chr3	+	186788309	186788420	0.0671901	-0.085	Retained ShRBM17	nonsense_mediated_decay	protein_coding	Poison Exon
ENSG00000178386	zinc finger protein 223	ZNF223	chr19	+	44063264	44063566	0.0472706	-0.248	Retained ShRBM17	nonsense_mediated_decay	protein_coding	Poison Exon
ENSG00000106462	enhancer of zeste 2 polycomb repressive complex 2 subunit	EZH2	chr7	-	148818977	148819059	0.00393266	-0.058	Retained ShRBM17	nonsense_mediated_decay	protein_coding	Poison Exon
ENSG00000152061	RAB GTPase activating protein 1 like	RABGAP1L	chr1	+	174957890	174958173	0.0557117	-0.245	Retained ShRBM17	nonsense_mediated_decay	protein_coding	Poison Exon
ENSG00000092108	sec1 family domain containing 1	SCFD1	chr14	+	30707816	30707876	0.00694714	-0.063	Retained ShRBM17	nonsense_mediated_decay	protein_coding	Poison Exon
ENSG00000129292	PHD finger protein 20 like 1	PHF20L1	chr8	+	132825034	132825157	0.001452	-0.134	Retained ShRBM17	nonsense_mediated_decay	protein_coding	Poison Exon
ENSG00000040275	spindle apparatus coiled-coil protein 1	SPDL1	chr5	+	169590755	169590829	0.0352947	-0.063	Retained ShRBM17	nonsense_mediated_decay	protein_coding	Poison Exon
ENSG00000100784	ribosomal protein S6 kinase A5	RPS6KA5	chr14	-	90919279	90919466	0.067996	-0.463	Retained ShRBM17	nonsense_mediated_decay	protein_coding	Poison Exon
ENSG00000085982	ubiquitin specific peptidase 40	USP40	chr2	-	233491031	233491071	0.00158594	-0.222	Retained ShRBM17	nonsense_mediated_decay	protein_coding	Poison Exon
ENSG00000168826	zinc finger and BTB domain containing 49	ZBTB49	chr4	+	4313040	4313114	0.00223699	-0.756	Retained ShRBM17	nonsense_mediated_decay	protein_coding	Poison Exon
ENSG00000182150	ERCC excision repair 6 like 2	ERCC6L2	chr9	+	95967318	95967625	0.0480963	-0.117	Retained ShRBM17	nonsense_mediated_decay	protein_coding	Poison Exon
ENSG00000161010	MRN complex interacting protein	MRNIP	chr5	-	179853196	179853276	0.0586505	-0.061	Retained ShRBM17	nonsense_mediated_decay	protein_coding	Poison Exon
ENSG00000168404	mixed lineage kinase domain like pseudokinase	MLKL	chr16	-	74676300	74676425	0.0262558	-0.18	Retained ShRBM17	nonsense_mediated_decay	protein_coding	Poison Exon
ENSG00000140992	3-phosphoinositide dependent protein kinase 1	PDPK1	chr16	+	2538618	2538771	0.0732119	-0.403	Retained ShRBM17	nonsense_mediated_decay	protein_coding	Poison Exon
ENSG00000125952	MYC associated factor X	MAX	chr14	-	65077343	65077428	0.00816074	-0.08	Retained ShRBM17	nonsense_mediated_decay	protein_coding	Poison Exon
ENSG00000154269	ectonucleotide pyrophosphatase/phosphodiesterase 3	ENPP3	chr6	+	131638450	131638576	0.0667191	-0.102	Retained ShRBM17	nonsense_mediated_decay	protein_coding	Poison Exon
ENSG00000171456	ASXL transcriptional regulator 1	ASXL1	chr20	+	32371777	32371874	0.00193013	-0.142	Retained ShRBM17	nonsense_mediated_decay	protein_coding	Poison Exon
ENSG00000204147	N-acylsphingosine amidohydrolase 2B	ASAH2B	chr10	+	50743672	50743741	0.0675624	-0.241	Retained ShRBM17	nonsense_mediated_decay	protein_coding	Poison Exon
ENSG00000089682	RNA binding motif protein 41	RBM41	chrX	-	107113396	107113468	0.0450057	-0.163	Retained ShRBM17	nonsense_mediated_decay	protein_coding	Poison Exon
ENSG00000103174	N-acetylglucosamine-1-phosphodiester alpha-N-acetylglucosaminidase	NAGPA	chr16	-	5028296	5028398	0.0202823	-0.167	Retained ShRBM17	nonsense_mediated_decay	protein_coding	Poison Exon
ENSG00000152795	heterogeneous nuclear ribonucleoprotein D like	HNRNPDL	chr4	-	82425562	82425667	0.00900562	-0.071	Retained ShRBM17	nonsense_mediated_decay	protein_coding	Poison Exon
ENSG00000161914	zinc finger protein 653	ZNF653	chr19	-	11500677	11500815	0.0959432	-0.18	Retained ShRBM17	nonsense_mediated_decay	protein_coding	Poison Exon
ENSG00000124786	solute carrier family 35 member B3	SLC35B3	chr6	-	8418743	8418885	0.00489386	-0.26	Retained ShRBM17	nonsense_mediated_decay	protein_coding	Poison Exon
ENSG00000101751	DNA polymerase iota	POLI	chr18	+	54283742	54283815	0.0301332	-0.34	Retained ShRBM17	nonsense_mediated_decay	protein_coding	Poison Exon
ENSG00000157212	PAX interacting protein 1	PAXIP1	chr7	-	154986016	154986179	0.0185756	-0.085	Retained ShRBM17	nonsense_mediated_decay	protein_coding	Poison Exon
ENSG00000116754	serine and arginine rich splicing factor 11	SRSF11	chr1	+	70231858	70231975	0.0230343	-0.07	Retained ShRBM17	nonsense_mediated_decay	protein_coding	Poison Exon
ENSG00000119782	FKBP prolyl isomerase 1B	FKBP1B	chr2	+	24054103	24054192	0.0131056	-0.148	Retained ShRBM17	nonsense_mediated_decay	protein_coding	Poison Exon
ENSG00000144580	CCR4-NOT transcription complex subunit 9	CNOT9	chr2	+	218573994	218574233	0.0679128	-0.059	Retained ShRBM17	nonsense_mediated_decay	protein_coding	Poison Exon
ENSG00000198860	tRNA splicing endonuclease subunit 15	TSEN15	chr1	+	184070615	184070732	0.0461643	-0.054	Retained ShRBM17	nonsense_mediated_decay	protein_coding	Poison Exon
ENSG00000102393	galactosidase alpha	GLA	chrX	-	101399743	101399800	0.000330521	-0.075	Retained ShRBM17	nonsense_mediated_decay	protein_coding	Poison Exon
ENSG00000143889	heterogeneous nuclear ribonucleoprotein L like	HNRNPLL	chr2	-	38577919	38578002	0.0131099	-0.069	Retained ShRBM17	nonsense_mediated_decay	protein_coding	Poison Exon
ENSG00000106477	centrosomal protein 41	CEP41	chr7	-	130426645	130426759	0.00665908	-0.301	Retained ShRBM17	nonsense_mediated_decay	protein_coding	Poison Exon
ENSG00000174227	phosphatidylinositol glycan anchor biosynthesis class G	PIGG	chr4	+	501100	501170	0.075088	-0.112	Retained ShRBM17	nonsense_mediated_decay	protein_coding	Poison Exon
ENSG00000182093	tryptophan rich basic protein	GET1	chr21	+	39407792	39407917	0.000375206	0.591	Skipped in ShRBM17	processed_transcript	nonsense_mediated_decay
ENSG00000205581	high mobility group nucleosome binding domain 1	HMGN1	chr21	-	39345829	39345958	0.0589681	0.089	Skipped in ShRBM17	processed_transcript	nonsense_mediated_decay
ENSG00000109685	nuclear receptor binding SET domain protein 2	NSD2	chr4	+	1939653	1939778	0.0716762	0.135	Skipped in ShRBM17	processed_transcript	nonsense_mediated_decay
ENSG00000163867	zinc finger MYM-type containing 6	ZMYM6	chr1	-	35030546	35030756	0.0102411	0.158	Skipped in ShRBM17	processed_transcript	protein_coding	Essential Exon
ENSG00000135365	PHD finger protein 21A	PHF21A	chr11	-	45946075	45946098	0.0163703	0.306	Skipped in ShRBM17	processed_transcript	protein_coding	Essential Exon
ENSG00000135049	ATP/GTP binding protein 1	AGTPBP1	chr9	-	85678334	85678398	0.0679128	0.23	Skipped in ShRBM17	processed_transcript	protein_coding	Essential Exon
ENSG00000185267	cerebral dopamine neurotrophic factor	CDNF	chr10	-	14834216	14834333	0.00121131	0.604	Skipped in ShRBM17	processed_transcript	protein_coding	Essential Exon
ENSG00000140743	cerebellar degeneration related protein 2	CDR2	chr16	-	22422160	22422214	0.0923032	0.41	Skipped in ShRBM17	processed_transcript	protein_coding	Essential Exon
ENSG00000142856	integrin subunit beta 3 binding protein	ITGB3BP	chr1	-	63446805	63446856	0.0235062	0.105	Skipped in ShRBM17	processed_transcript	protein_coding	Essential Exon
ENSG00000133226	serine and arginine repetitive matrix 1	SRRM1	chr1	+	24647078	24647208	0	-0.305	Retained ShRBM17	processed_transcript	protein_coding
ENSG00000134884	arginine and glutamate rich 1	ARGLU1	chr13	-	106557558	106557616	0.0314626	-0.066	Retained ShRBM17	processed_transcript	protein_coding
ENSG00000142599	arginine-glutamic acid dipeptide repeats	RERE	chr1	-	8423166	8423247	0.023777	-0.738	Retained ShRBM17	processed_transcript	protein_coding
ENSG00000031823	RAN binding protein 3	RANBP3	chr19	-	5950716	5950872	0.0761903	-0.429	Retained ShRBM17	processed_transcript	protein_coding
ENSG00000171843	MLLT3, super elongation complex subunit	MLLT3	chr9	-	20380206	20380327	0.00058894	-0.737	Retained ShRBM17	processed_transcript	protein_coding
ENSG00000160216	1-acylglycerol-3-phosphate O-acyltransferase 3	AGPAT3	chr21	+	43960631	43960779	6.27484e-05	-0.163	Retained ShRBM17	processed_transcript	protein_coding
ENSG00000144840	RAB, member of RAS oncogene family like 3	RABL3	chr3	-	120738526	120738667	0.0011636	-0.088	Retained ShRBM17	processed_transcript	protein_coding
ENSG00000238105	GOLGA2 pseudogene 5	GOLGA2P5	chr12	-	100157348	100157445	0.0145822	0.569	Skipped in ShRBM17	processed_transcript	transcribed_unprocessed_pseudogene
ENSG00000185619	polycomb group ring finger 3	PCGF3	chr4	+	732399	732498	0.0508859	0.243	Skipped in ShRBM17	protein_coding	nonsense_mediated_decay	Poison Exon
ENSG00000132541	reactive intermediate imine deaminase A homolog	RIDA	chr8	-	98108645	98108713	0.0790212	0.139	Skipped in ShRBM17	protein_coding	nonsense_mediated_decay	Poison Exon
ENSG00000125354	septin 6	SEPTIN6	chrX	-	119618712	119618786	0.00653044	0.26	Skipped in ShRBM17	protein_coding	nonsense_mediated_decay	Poison Exon
ENSG00000175866	BAI1 associated protein 2	BAIAP2	chr17	+	81036862	81036961	0.013531	0.098	Skipped in ShRBM17	protein_coding	nonsense_mediated_decay	Poison Exon
ENSG00000138942	ring finger protein 185	RNF185	chr22	+	31196935	31197157	0.00259836	0.416	Skipped in ShRBM17	protein_coding	retained_intron
ENSG00000240344	peptidylprolyl isomerase like 3	PPIL3	chr2	-	200882341	200882435	0.0103001	-0.223	Retained ShRBM17	protein_coding	processed_transcript
ENSG00000035115	SH3 and SYLF domain containing 1	SH3YL1	chr2	-	256206	256690	0.00166827	-0.701	Retained ShRBM17	protein_coding	processed_transcript
ENSG00000182628	spindle and kinetochore associated complex subunit 2	SKA2	chr17	-	59131280	59131367	0.0993832	-0.085	Retained ShRBM17	protein_coding	processed_transcript
ENSG00000106701	fibronectin type III and SPRY domain containing 1 like	FSD1L	chr9	+	105479353	105479376	0.00664129	-0.435	Retained ShRBM17	protein_coding	processed_transcript
ENSG00000124177	chromodomain helicase DNA binding protein 6	CHD6	chr20	-	41564010	41564151	0.0288391	-0.189	Retained ShRBM17	protein_coding	processed_transcript
ENSG00000152763	WD repeat domain 78	WDR78	chr1	-	66874780	66874937	0.0108842	-0.564	Retained ShRBM17	protein_coding	nonsense_mediated_decay	Essential Exon
ENSG00000196924	filamin A	FLNA	chrX	-	154357250	154357274	0.000456023	-0.122	Retained ShRBM17	protein_coding	retained_intron
ENSG00000090006	latent transforming growth factor beta binding protein 4	LTBP4	chr19	+	40622949	40623021	0.0870121	-0.208	Retained ShRBM17	protein_coding	retained_intron
ENSG00000090857	pyruvate dehydrogenase phosphatase regulatory subunit	PDPR	chr16	+	70114820	70114930	0.0414343	0.284	Skipped in ShRBM17	retained_intron	protein_coding
ENSG00000172244	chromosome 5 open reading frame 34	C5orf34	chr5	-	43509144	43509375	0.065938	0.213	Skipped in ShRBM17	retained_intron	protein_coding
ENSG00000160766	glucosylceramidase beta pseudogene 1	GBAP1	chr1	-	155218387	155218479	0.0219269	-0.518	Retained ShRBM17	retained_intron	processed_transcript
ENSG00000083799	CYLD lysine 63 deubiquitinase	CYLD	chr16	+	50744729	50744866	0.0571866	-0.216	Retained ShRBM17	retained_intron	protein_coding
ENSG00000196459	trafficking protein particle complex 2	TRAPPC2	chrX	-	13734049	13734185	0.00635414	-0.225	Retained ShRBM17	retained_intron	protein_coding
ENSG00000257489	TBC1 domain family, member 2B (TBC1D2B) pseudogene	AC010203.1	chr12	-	100198843	100198972	0.0535066	0.438	Skipped in ShRBM17	transcribed_unprocessed_pseudogene	processed_transcript
ENSG00000235944	zinc finger protein 815, pseudogene	ZNF815P	chr7	+	5831180	5831283	0.00166827	-0.629	Retained ShRBM17	transcribed_unprocessed_pseudogene	processed_transcript
BIOTYPE SWITCH "with reference to - ShRBM17"

## Sheet: Change in Protein product
GeneID	Description	geneSymbol	chr	strand	exonStart_0base	exonEnd	FDR	deltaPSI	Exon skipping/Retention	Functional Switch	ShRBM17_UniportID ## length aa (Domain |length aa)	Control_UniportID ## length aa (Domain |length aa)	Protein length	Complete Domain gain/loss	Partial Domain gain/loss
ENSG00000101966	X-linked inhibitor of apoptosis	XIAP	chrX	+	123860166	123860293	0.000590891	0.392	Skipped in ShRBM17	P98170##497 TO B1AKU3##16	P98170##497	B1AKU3##16	Bigger protein
ENSG00000100722	zinc finger CCCH-type containing 14	ZC3H14	chr14	+	88596733	88596808	0.0189378	0.13	Skipped in ShRBM17	Q6PJT7##736 TO G3V256##605. ??? Domains Not in final file!	Q6PJT7##736	G3V256##605 |C3H1-type|C3H1-type|C3H1-type	Bigger protein	Complete loss of Domains
ENSG00000121067	speckle type BTB/POZ protein	SPOP	chr17	-	49668026	49668078	0.0448289	0.433	Skipped in ShRBM17	O43791##374 TO D6RGZ4##185 ??? Domains Not in final file!	D6RGZ4 185|MATH	O43791 374|MATH|BTB	Smaller protein	Complete loss of Domains
ENSG00000100077	G protein-coupled receptor kinase 3	GRK3	chr22	+	25702841	25702991	0.0322821	0.179	Skipped in ShRBM17	[Q8N433##387 ([RGS|121 aa, Protein kinase|196 aa] TO P35626##688 688 ([RGS|121 aa, Protein kinase|262 aa, AGC-kinase C-terminal|67 aa, PH|94 aa])]	Q8N433##387 ([RGS|121 aa, Protein kinase|196 aa	P35626##688 RGS|121 aa, Protein kinase|262 aa, AGC-kinase C-terminal|67 aa, PH|94 aa	Smaller protein	Complete loss of Domains
ENSG00000165490	DNA damage induced apoptosis suppressor	DDIAS	chr11	+	82913654	82913746	0.00459561	0.726	Skipped in ShRBM17	[Q8IXT1##998 (NO DOMAINS) TO E9PMA7##225 ([Rep_fac-A_C|89 aa])]	Q8IXT1##998 (NO DOMAINS)	E9PMA7##225 Rep_fac-A_C|89 aa	Bigger protein	Complete loss of Domains
ENSG00000143363	prune exopolyphosphatase 1	PRUNE1	chr1	+	151017811	151017904	0.0589681	0.112	Skipped in ShRBM17	[Q86TP1##453 (NO DOMAINS) TO Q5SZF2##139 ([DHHA2|101 aa])]	Q86TP1##453 (NO DOMAINS)	Q5SZF2##139 DHHA2|101 aa	Bigger protein	Complete loss of Domains
ENSG00000196646	zinc finger protein 136	ZNF136	chr19	+	12185784	12185911	0.00235487	0.317	Skipped in ShRBM17	[P52737##540 ([KRAB|86 aa] TO C9JR58##89 (NO DOMAINS)]	C9JR58##89 (NO DOMAINS)	P52737##540 ([KRAB|86 aa	Smaller protein	Complete loss of Domains
ENSG00000078177	NEDD4 binding protein 2	N4BP2	chr4	+	40097226	40097569	0.0525834	0.145	Skipped in ShRBM17	[D6R9J2##173 (NO DOMAINS) TO Q86UW6##1770 ([CUE|43 aa, Smr|79 aa])]	D6R9J2##173 (NO DOMAINS	Q86UW6##1770 ([CUE|43 aa, Smr|79 aa	Smaller protein	Complete loss of Domains
ENSG00000273136	NBPF member 26	NBPF26	chr1	+	120822103	120822156	0.0352947	0.44	Skipped in ShRBM17	[A0A087WTG0##535 ([Olduvai|94 aa, Olduvai|92 aa, Olduvai|41 aa] TO A0A494C0A2##727 ([EGF-like|38 aa, EGF-like|38 aa, EGF-like|36 aa, EGF-like|37 aa, EGF-like|35 aa, Olduvai|94 aa, Olduvai|92 aa, Olduvai|62 aa])]	A0A087WTG0##535 ([Olduvai|94 aa, Olduvai|92 aa, Olduvai|41 aa	A0A494C0A2##727 ([EGF-like|38 aa, EGF-like|38 aa, EGF-like|36 aa, EGF-like|37 aa, EGF-like|35 aa, Olduvai|94 aa, Olduvai|92 aa, Olduvai|62 aa	Smaller protein	Complete loss of Domains
ENSG00000100697	dicer 1, ribonuclease III	DICER1	chr14	-	95141153	95141187	0.00691622	-0.277	Retained ShRBM17	[Q9UPY3##1922 ([Helicase ATP-binding|176 aa, Helicase C-terminal|169 aa, Dicer dsRNA-binding fold|92 aa, PAZ|151 aa, RNase III 1|127 aa, RNase III 2|158 aa, DRBM|65 aa] TO Q5D0K5##70 (NO DOMAINS)]	Q5D0K5##70 (NO DOMAINS)	Q9UPY3##1922 ([Helicase ATP-binding|176 aa, Helicase C-terminal|169 aa, Dicer dsRNA-binding fold|92 aa, PAZ|151 aa, RNase III 1|127 aa, RNase III 2|158 aa, DRBM|65 aa]	Smaller protein	Complete loss of Domains
ENSG00000003096	kelch like family member 13	KLHL13	chrX	-	117983479	117983545	0.0518487	-0.325	Retained ShRBM17	[Q9P2N7##655 ([BTB|69 aa, BACK|101 aa] TO C9JTS9##94 (NO DOMAINS)]	C9JTS9##94 (NO DOMAINS)	Q9P2N7##655 ([BTB|69 aa, BACK|101 aa]	Smaller protein	Complete loss of Domains
ENSG00000174306	zinc fingers and homeoboxes 3	ZHX3	chr20	-	41213733	41213899	0.0863471	-0.5	Retained ShRBM17	[Q9H4I2##956 (NO DOMAINS) TO H0YNY7##315 ([C2H2-type|23 aa, C2H2-type|23 aa])]	Q9H4I2##956 (NO DOMAINS)	H0YNY7##315 ([C2H2-type|23 aa, C2H2-type|23 aa	Bigger protein	Complete loss of Domains
ENSG00000163939	polybromo 1	PBRM1	chr3	-	52682091	52682233	0.0288936	-0.439	Retained ShRBM17	[Q86U86##1689 ([Bromo 1|70 aa, Bromo 2|70 aa, Bromo 3|70 aa, Bromo 4|70 aa, Bromo 5|70 aa, Bromo 6|70 aa, BAH 1|118 aa, BAH 2|116 aa] TO C9JCJ2##87 (NO DOMAINS)]	C9JCJ2##87 (NO DOMAINS)	Q86U86##1689 ([Bromo 1|70 aa, Bromo 2|70 aa, Bromo 3|70 aa, Bromo 4|70 aa, Bromo 5|70 aa, Bromo 6|70 aa, BAH 1|118 aa, BAH 2|116 aa]	Smaller protein	Complete loss of Domains
ENSG00000129535	neural retina leucine zipper	NRL	chr14	-	24084519	24084745	0.0981329	-0.407	Retained ShRBM17	[P54845##237 ([bZIP|63 aa] TO H0YNW2##65 (NO DOMAINS)]	H0YNW2##65 (NO DOMAINS)	P54845##237 ([bZIP|63 aa]	Smaller protein	Complete loss of Domains
ENSG00000197746	prosaposin	PSAP	chr10	-	71823887	71823896	0.00283561	-0.063	Retained ShRBM17	[P07602##524 524 ([Saposin A-type 1|40 aa, Saposin B-type 1|83 aa, Saposin B-type 2|81 aa, Saposin B-type 3|81 aa, Saposin B-type 4|81 aa, Saposin A-type 2|36 aa] TO A0A0J9YXB8##167 ([Saposin B-type|78 aa, Saposin B-type|52 aa])]	A0A0J9YXB8##167 ([Saposin B-type|78 aa, Saposin B-type|52 aa]	P07602##524 524 ([Saposin A-type 1|40 aa, Saposin B-type 1|83 aa, Saposin B-type 2|81 aa, Saposin B-type 3|81 aa, Saposin B-type 4|81 aa, Saposin A-type 2|36 aa	Smaller protein	Complete loss of Domains
ENSG00000143776	CDC42 binding protein kinase alpha	CDC42BPA	chr1	-	227068653	227068701	0.00713736	-0.208	Retained ShRBM17	[H0Y6V3##728 ([Phorbol-ester/DAG-type|50 aa, PH|119 aa, CNH|272 aa] TO H0Y5V1##1048 ([Phorbol-ester/DAG-type|50 aa, PH|119 aa, CNH|272 aa, CRIB|13 aa])]	H0Y6V3##728 ([Phorbol-ester/DAG-type|50 aa, PH|119 aa, CNH|272 aa]	H0Y5V1##1048 ([Phorbol-ester/DAG-type|50 aa, PH|119 aa, CNH|272 aa, CRIB|13 aa]	Smaller protein	Complete loss of Domains
ENSG00000179950	poly(U) binding splicing factor 60	PUF60	chr8	-	143827384	143827536	0.0497001	-0.55	Retained ShRBM17	[E9PN18##263 ([RRM|78 aa] TO Q9UHX1##559 ([RRM 1|78 aa, RRM 2|78 aa, RRM 3; atypical|87 aa])]	E9PN18##263 ([RRM|78 aa]	Q9UHX1##559 ([RRM 1|78 aa, RRM 2|78 aa, RRM 3; atypical|87 aa]	Smaller protein	Complete loss of Domains
ENSG00000117523	proline rich coiled-coil 2C	PRRC2C	chr1	+	171589368	171589605	0.0258481	-0.139	Retained ShRBM17	[E7EPN9##2819 ([BAT2_N|161 aa] TO A0A2R8YET2##1090 (NO DOMAINS)]	A0A2R8YET2##1090 (NO DOMAINS)	E7EPN9##2819 ([BAT2_N|161 aa	Smaller protein	Complete loss of Domains
ENSG00000127616	SWI/SNF related, matrix associated, actin dependent regulator of chromatin, subfamily a, member 4	SMARCA4	chr19	+	10980776	10980852	0.0109122	-0.21	Retained ShRBM17	[A0A2R8Y866##157 (NO DOMAINS) TO P51532##1647 ([QLQ|35 aa, HSA|72 aa, Helicase ATP-binding|165 aa, Helicase C-terminal|162 aa, Bromo|70 aa])]	A0A2R8Y866##157 (NO DOMAINS)	P51532##1647 ([QLQ|35 aa, HSA|72 aa, Helicase ATP-binding|165 aa, Helicase C-terminal|162 aa, Bromo|70 aa]	Smaller protein	Complete loss of Domains
ENSG00000171295	zinc finger protein 440	ZNF440	chr19	+	11830273	11830409	0.0769044	0.179	Skipped in ShRBM17	[C9JG89##53 ([C2H2-type|27 aa] TO Q8IYI8##595 ([KRAB|82 aa])]	C9JG89##53 ([C2H2-type|27 aa	Q8IYI8##595 ([KRAB|82 aa	Smaller protein	Different domains
ENSG00000073584	SWI/SNF related, matrix associated, actin dependent regulator of chromatin, subfamily e, member 1	SMARCE1	chr17	-	40630207	40630286	0.00359586	0.315	Skipped in ShRBM17	A0A2R8Y765##277 TO Q969G3##411 ??? Domains Not in final file!	A0A2R8Y765##277|HMGbox	Q969G3##411	Smaller protein	Gain of complete domain
ENSG00000076928	Rho guanine nucleotide exchange factor 1	ARHGEF1	chr19	+	41897314	41897326	0.00021433	0.673	Skipped in ShRBM17	[M0QZH8##275 ([DH|54 aa] TO M0QZR4##968 ([DH|189 aa, PH|113 aa])]	M0QZR4##968 ([DH|189 aa, PH|113 aa	M0QZH8##275 ([DH|54 aa	Bigger protein	Gain of complete domain
ENSG00000166743	acyl-CoA synthetase medium chain family member 1	ACSM1	chr16	-	20636738	20636840	0.00012157	0.653	Skipped in ShRBM17	[H0YAU5##249 ([AMP-binding|99 aa, AMP-binding|39 aa, AMP-binding_C|80 aa] TO Q08AH1##577 (NO DOMAINS)]	H0YAU5##249 ([AMP-binding|99 aa, AMP-binding|39 aa, AMP-binding_C|80 aa	Q08AH1##577 (NO DOMAINS)	Smaller protein	Gain of complete domain
ENSG00000003436	tissue factor pathway inhibitor	TFPI	chr2	-	187544503	187544637	8.83166e-05	0.438	Skipped in ShRBM17	[C9JQ14##106 ([BPTI/Kunitz inhibitor|50 aa] TO C9JP39##61 (NO DOMAINS)]	C9JQ14##106 ([BPTI/Kunitz inhibitor|50 aa	C9JP39##61 (NO DOMAINS	Bigger protein	Gain of complete domain
ENSG00000109685	nuclear receptor binding SET domain protein 2	NSD2	chr4	+	1899220	1899395	0.0968969	-0.124	Retained ShRBM17	[D6RFE7##37 (NO DOMAINS) TO O96028##1365 ([PWWP 1|64 aa, PWWP 2|62 aa, AWS|50 aa, SET|117 aa, Post-SET|16 aa])]	O96028##1365 ([PWWP 1|64 aa, PWWP 2|62 aa, AWS|50 aa, SET|117 aa, Post-SET|16 aa	D6RFE7##37 (NO DOMAINS	Bigger protein	Gain of complete domain
ENSG00000127481	ubiquitin protein ligase E3 component n-recognin 4	UBR4	chr1	-	19146022	19146106	0.00876498	0.082	Skipped in ShRBM17	X6RE05##984 TO Q5T4S7##5183	Q5T4S7##5183	X6RE05##984	Bigger protein
ENSG00000163319	mitochondrial ribosomal protein S18C	MRPS18C	chr4	+	83458345	83458429	7.19029e-07	0.177	Skipped in ShRBM17	Q9Y3D5|A0A024RDH9##142 UnknownA TO D6RCM2##114	D6RCM2##114	Q9Y3D5|A0A024RDH9##142	Smaller protein
ENSG00000100802	chromosome 14 open reading frame 93	C14orf93	chr14	-	23000958	23001037	0.0018042	0.438	Skipped in ShRBM17	Q9H972##538 TO G3V4W6##136	G3V4W6##136	Q9H972##538	Smaller protein
ENSG00000123349	prefoldin subunit 5	PFDN5	chr12	+	53297849	53297924	0.000143138	0.063	Skipped in ShRBM17	Q99471##154 TO H3BMQ1##84	H3BMQ1##84	Q99471##154	Smaller protein
ENSG00000101473	acyl-CoA thioesterase 8	ACOT8	chr20	-	45843526	45843772	0.0456335	0.253	Skipped in ShRBM17	O14734##319 TO H7C5A7##209	H7C5A7##209	O14734##319	Smaller protein
ENSG00000167130	dolichyldiphosphatase 1	DOLPP1	chr9	+	129086138	129086267	0.0391208	0.103	Skipped in ShRBM17	NA##UnknownB TO Q86YN1|A0A024R8B5##238 238	NA##UnknownB	Q86YN1|A0A024R8B5##238
ENSG00000163157	tropomodulin 4	TMOD4	chr1	-	151170518	151170663	0.00837924	0.571	Skipped in ShRBM17	K7EQW4##123 TO Q9NZQ9##345	K7EQW4##123	Q9NZQ9##345	Smaller protein
ENSG00000010318	PHD finger protein 7	PHF7	chr3	+	52422759	52422881	0.00102636	0.481	Skipped in ShRBM17	H7C5Q8##63 TO Q9BWX1##381	H7C5Q8##63	Q9BWX1##381	Smaller protein
ENSG00000186866	protein O-fucosyltransferase 2	POFUT2	chr21	-	45282803	45282938	0.0230343	0.096	Skipped in ShRBM17	H7C2T5##265 TO Q9Y2G5##429	Q9Y2G5##429	H7C2T5##265	Bigger protein
ENSG00000138614	integrator complex subunit 14	INTS14	chr15	-	65607158	65607425	0.0695392	0.1	Skipped in ShRBM17	H3BMK7##137 TO Q96SY0##518	Q96SY0##518	H3BMK7##137	Bigger protein
ENSG00000132768	DPH2 homolog	DPH2	chr1	+	43971659	43972070	0.0145822	0.063	Skipped in ShRBM17	H0YCR5##262 TO Q9BQC3##489	Q9BQC3##489	H0YCR5##262	Bigger protein
ENSG00000100802	chromosome 14 open reading frame 93	C14orf93	chr14	-	22999956	23000117	1.77539e-06	0.716	Skipped in ShRBM17	G3V3W0##83 TO G3V4W6##136	G3V4W6##136	G3V3W0##83	Bigger protein
ENSG00000139644	transmembrane BAX inhibitor motif containing 6	TMBIM6	chr12	+	49741956	49742115	0.0612181	0.461	Skipped in ShRBM17	F8W201##95 TO F8W086##108	F8W086##108	F8W201##95	Bigger protein
ENSG00000123297	Ts translation elongation factor, mitochondrial	TSFM	chr12	+	57802173	57802264	2.74137e-06	0.725	Skipped in ShRBM17	F8VS27##230 TO P43897##325	P43897##325	F8VS27##230	Bigger protein
ENSG00000005436	GC-rich sequence DNA-binding factor 2	GCFC2	chr2	-	75702312	75702423	0.0309966	0.261	Skipped in ShRBM17	C9JII4##185 TO P16383##781	C9JII4##185	P16383##781	Smaller protein
ENSG00000146733	phosphoserine phosphatase	PSPH	chr7	-	56043147	56043261	0.010393	0.55	Skipped in ShRBM17	C9JEJ7##46 TO NA##UnknownB	C9JEJ7##46	NA##UnknownB
ENSG00000163577	eukaryotic translation initiation factor 5A2	EIF5A2	chr3	-	170894291	170894383	0.0306133	0.143	Skipped in ShRBM17	C9J7B5##109 TO F8WCJ1##105	C9J7B5##109	F8WCJ1##105	Bigger protein
ENSG00000204138	phosphatase and actin regulator 4	PHACTR4	chr1	+	28457831	28457855	0.0288221	0.132	Skipped in ShRBM17	A0A0J9YVR0##221 TO Q8IZ21##702	Q8IZ21##702	A0A0J9YVR0##221	Bigger protein
ENSG00000134470	interleukin 15 receptor subunit alpha	IL15RA	chr10	-	5968775	5968928	0.000533798	0.557	Skipped in ShRBM17	[Q13261##267 ([Sushi|64 aa] TO K9N2S2##305 ([Sushi|64 aa])]	Q13261##267 ([Sushi|64 aa]	K9N2S2##305 ([Sushi|64 aa]	Smaller protein
ENSG00000135127	BICD family like cargo adaptor 1	BICDL1	chr12	+	120074442	120074586	0.0878938	0.535	Skipped in ShRBM17	[H0YHP2##291 (NO DOMAINS TO Q6ZP65##573 (NO DOMAINS)]	Q6ZP65##573 (NO DOMAINS	H0YHP2##291 (NO DOMAINS	Bigger protein
ENSG00000163625	WD repeat and FYVE domain containing 3	WDFY3	chr4	-	84726860	84726911	0.000253272	0.724	Skipped in ShRBM17	[H0Y9T6##639 ([BEACH-type PH|125 aa, BEACH|293 aa] TO Q8IZQ1##UnknownA 3526 ([BEACH-type PH|125 aa, BEACH|293 aa])]	H0Y9T6##639 ([BEACH-type PH|125 aa, BEACH|293 aa	Q8IZQ1##3526 ([BEACH-type PH|125 aa, BEACH|293 aa	Smaller protein
ENSG00000215126	COBW domain containing 6	CBWD6	chr9	-	41156382	41156439	0.00900562	0.23	Skipped in ShRBM17	[H0Y5V3##376 ([CobW C-terminal|103 aa] TO A0A0B4J2F1##359 ([CobW C-terminal|103 aa])]	H0Y5V3##376 ([CobW C-terminal|103 aa	A0A0B4J2F1##359 ([CobW C-terminal|103 aa	Bigger protein
ENSG00000186866	protein O-fucosyltransferase 2	POFUT2	chr21	-	45285268	45285328	0.00691622	-0.1	Retained ShRBM17	Q9Y2G5##429 TO S6FW71##212
ENSG00000183060	LysM domain containing 4	LYSMD4	chr15	-	99731172	99731198	0.0178717	-0.806	Retained ShRBM17	Q5XG99##296 TO B3KWE4##170	B3KWE4##170	Q5XG99##296	Smaller protein
ENSG00000111907	TPD52 like 1	TPD52L1	chr6	+	125257097	125257158	0.000135573	-0.196	Retained ShRBM17	Q16890##204 TO E9PPQ1##191	E9PPQ1##191	Q16890##204	Smaller protein
ENSG00000100564	phosphatidylinositol glycan anchor biosynthesis class H	PIGH	chr14	-	67592314	67592436	0.0444075	-0.058	Retained ShRBM17	Q14442##188 TO H0YKI1##136	H0YKI1##136	Q14442##188	Smaller protein
ENSG00000008838	mediator complex subunit 24	MED24	chr17	-	40034915	40034972	0.000102087	-0.219	Retained ShRBM17	O75448##989 TO F5GY88##1008	F5GY88##1008	O75448##989	Smaller protein
ENSG00000187097	ectonucleoside triphosphate diphosphohydrolase 5	ENTPD5	chr14	-	74007695	74007812	0.00837924	-0.454	Retained ShRBM17	O75356|A0A024R6D3##428 428 TO G3V4I0##407	G3V4I0##407	O75356|A0A024R6D3##428	Bigger protein
ENSG00000196428	TSC22 domain family member 2	TSC22D2	chr3	+	150423048	150423120	0.044992	-0.128	Retained ShRBM17	O75157##780 TO H0Y865##204	O75157##780	H0Y865##204	Smaller protein
ENSG00000149547	EI24, autophagy associated transmembrane protein	EI24	chr11	+	125570103	125570190	0.0190681	-0.161	Retained ShRBM17	O14681|A0A024R3I8##340 340 TO E9PM05##187	E9PM05##187	O14681|A0A024R3I8##340	Smaller protein
ENSG00000093167	LRR binding FLII interacting protein 2	LRRFIP2	chr3	-	37072789	37072882	0.0863471	-0.415	Retained ShRBM17	H7C3N9##182 TO Q9Y608##721	Q9Y608##721	H7C3N9##182	Bigger protein
ENSG00000173905	golgi integral membrane protein 4	GOLIM4	chr3	-	168040785	168040869	0.0829472	-0.145	Retained ShRBM17	F8W785##668 TO O00461##696	O00461##696	F8W785##668	Bigger protein
ENSG00000197647	zinc finger protein 433	ZNF433	chr19	-	12021929	12022189	0.0101228	-0.266	Retained ShRBM17	C9JUV2##77 TO F8VTV7##207	C9JUV2##77	F8VTV7##207	Smaller protein
ENSG00000151474	FERM domain containing 4A	FRMD4A	chr10	-	13693481	13693517	0.0957175	-0.301	Retained ShRBM17	A0A0J9YWI3##77 TO Q9P2Q2##1039	A0A0J9YWI3##77	Q9P2Q2##1039	Smaller protein
ENSG00000148950	inner mitochondrial membrane peptidase subunit 1	IMMP1L	chr11	-	31463171	31463305	0.00559319	-0.23	Retained ShRBM17	A0A0B4J221##57 TO E9PR99##94	E9PR99##94	A0A0B4J221##57	Bigger protein
ENSG00000151881	transmembrane protein 267	TMEM267	chr5	-	43479889	43479987	0.097306	-0.197	Retained ShRBM17	A0A024R0B8|Q0VDI3##215 215 TO D6RAV6##176	D6RAV6##176	A0A024R0B8|Q0VDI3##215	Smaller protein
ENSG00000100813	apoptotic chromatin condensation inducer 1	ACIN1	chr14	-	23089981	23090101	0.0971947	-0.104	Retained ShRBM17	[S4R3H4##1283 ([SAP|34 aa] TO E7EQT4##1301 ([SAP|34 aa])]	S4R3H4##1283 ([SAP|34 aa]	E7EQT4##1301 ([SAP|34 aa]	Smaller protein
ENSG00000069493	C-type lectin domain family 2 member D	CLEC2D	chr12	+	9693033	9693115	0.034355	-0.479	Retained ShRBM17	[Q9UHP7##191 ([C-type lectin|103 aa] TO A0A0C4DG81##173 ([C-type lectin|67 aa])]	A0A0C4DG81##173 ([C-type lectin|67 aa]	Q9UHP7##191 ([C-type lectin|103 aa]			Partial Loss of of domain
ENSG00000108854	SMAD specific E3 ubiquitin protein ligase 2	SMURF2	chr17	-	64606601	64606640	0.087015	-0.199	Retained ShRBM17	[Q9HAU4##748 ([C2|118 aa, WW 1|33 aa, WW 2|33 aa, WW 3|33 aa, HECT|334 aa] TO J3QQM4##561 ([C2|84 aa, WW|33 aa, WW|33 aa, WW|33 aa, HECT|160 aa])]	Q9HAU4##748 ([C2|118 aa, WW 1|33 aa, WW 2|33 aa, WW 3|33 aa, HECT|334 aa]	J3QQM4##561 ([C2|84 aa, WW|33 aa, WW|33 aa, WW|33 aa, HECT|160 aa]	Bigger protein		Partial gain of of domains
ENSG00000139218	SR-related CTD associated factor 11	SCAF11	chr12	-	45974189	45975734	0.000300242	-0.064	Retained ShRBM17	[Q99590##1463 (NO DOMAINS) TO F8W6K1##117 ([RING-type|41 aa])]	F8W6K1##117 ([RING-type|41 aa]	Q99590##1463 (NO DOMAINS)	Smaller protein
ENSG00000166908	phosphatidylinositol-5-phosphate 4-kinase type 2 gamma	PIP4K2C	chr12	+	57599399	57599438	0.065938	-0.121	Retained ShRBM17	[Q8TBX8##421 ([PIPK|377 aa] TO H0YIJ6##134 ([PIPK|133 aa])]	Q8TBX8##421 ([PIPK|377 aa]	H0YIJ6##134 ([PIPK|133 aa]	Bigger protein
ENSG00000116747	Ro60, Y RNA binding protein	RO60	chr1	+	193070553	193070619	0.04399	-0.08	Retained ShRBM17	[P10155##538 538 ([TROVE|353 aa] TO H0Y9N5##193 ([TROVE|192 aa])]	H0Y9N5##193 ([TROVE|192 aa]	P10155##538 538 ([TROVE|353 aa]	Smaller protein		Partial Loss of of domain
ENSG00000106290	TATA-box binding protein associated factor 6	TAF6	chr7	-	100116513	100116612	0.092462	-0.106	Retained ShRBM17	[A0A1D5RMS5##9 (NO DOMAINS) TO C9J7C4##114 ([TAF|66 aa])]	A0A1D5RMS5##9 (NO DOMAINS)	C9J7C4##114 ([TAF|66 aa
ENSG00000175224	autophagy related 13	ATG13	chr11	+	46621059	46621157	0.0727689	-0.137	Retained ShRBM17	[A0A1B0GXJ3##32 (NO DOMAINS TO O75143##517 (NO DOMAINS)]	A0A1B0GXJ3##32 (NO DOMAINS	O75143##517 (NO DOMAINS	Smaller protein
ENSG00000115084	solute carrier family 35 member F5	SLC35F5	chr2	-	113733364	113733403	0.0144083	-0.135	Retained ShRBM17	[A0A024RAD4##523 523 (NO DOMAINS TO H7C0S5##242 (NO DOMAINS)]	H7C0S5##242 (NO DOMAINS)	A0A024RAD4##523 523 (NO DOMAINS	Smaller protein
