# Supplementary material for: RBM17 Mediates Evasion of Pro-Leukemic Factors from Splicing-coupled NMD to Enforce Leukemic Stem Cell Maintenance
Source: Research Square preprint supplement (doi:10.21203/rs.3.rs-728533/v1), 2021-07-27
Supplement: Supplementary file 4 [file 47f9113273062909e57f73ad.xlsx]

## Sheet: 20_NMD_GO
Category	Term	Count	%	PValue	Genes	List Total	Pop Hits	Pop Total	Fold Enrichment	Bonferroni	Benjamini	FDR
GOTERM_BP_DIRECT	GO:0006397~mRNA processing	5	30	9.97e-07	RBM39,TSEN15, HNRNPLL, SRSF11, SRRM1	19	179	16792	29.6242	0.000116	0.000116	0.000116
GOTERM_BP_DIRECT	GO:0008380~RNA splicing	3	20	0.000694	RBM39, SRSF11, SRRM1	19	166	16792	21.2961	0.0773878	0.0402592	0.0402592
