# Supplementary material for: RBM17 Mediates Evasion of Pro-Leukemic Factors from Splicing-coupled NMD to Enforce Leukemic Stem Cell Maintenance
Source: Research Square preprint supplement (doi:10.21203/rs.3.rs-728533/v1), 2021-07-27
Supplement: Supplementary file 6 [file 68050e79ffe64906dd7383e1.xlsx]

## Sheet: CE
GeneID	geneSymbol	chr	strand	exonStart_0base	exonEnd	upstreamES	upstreamEE	downstreamES	downstreamEE	ID	IJC_SAMPLE_1	SJC_SAMPLE_1	IJC_SAMPLE_2	SJC_SAMPLE_2	IncFormLen	SkipFormLen	PValue	FDR	IncLevel1	IncLevel2	IncLevelDifference
ENSG00000248475	AC016642.1	chr5	-	58815733	58815812	58814659	58814745	58817043	58817099	63352	0,0	1,1	2,2	0,0	178	99	8.14458e-09	1.11186e-05	0.0,0.0	1.0,1.0	-1
ENSG00000196295	GARS1-DT	chr7	-	30552099	30552179	30551317	30551395	30563730	30563998	11863	0,0	1,1	1,2	0,0	179	99	1.26342e-08	1.57787e-05	0.0,0.0	1.0,1.0	-1
ENSG00000237853	NFIA-AS1	chr1	-	61249947	61249981	61248944	61249109	61253410	61253484	87877	0,0	2,3	1,1	0,0	133	99	6.31128e-09	9.99675e-06	0.0,0.0	1.0,1.0	-1
ENSG00000189195	BTBD8	chr1	+	92175062	92175249	92171398	92171460	92176828	92177546	11220	0,0	3,3	1,10	0,1	286	99	4.22851e-10	1.30766e-06	0.0,0.0	1.0,0.776	-0.888
ENSG00000171097	KYAT1	chr9	-	128847432	128847643	128846679	128846859	128881896	128881931	58166	0,1	1,1	3,1	0,0	310	99	6.95656e-05	0.0122271	0.0,0.242	1.0,1.0	-0.879
ENSG00000133962	CATSPERB	chr14	-	91672866	91673016	91669813	91669972	91693125	91693244	21795	0,1	1,1	1,3	0,0	249	99	0.00013595	0.0197604	0.0,0.284	1.0,1.0	-0.858
ENSG00000168517	HEXIM2	chr17	+	45162487	45162635	45161895	45161939	45162749	45162859	34822	2,0	2,1	16,4	0,0	247	99	4.13099e-05	0.00843632	0.286,0.0	1.0,1.0	-0.857
ENSG00000225873	C3orf86	chr3	-	44437697	44437767	44422852	44422937	44439796	44439946	89653	0,2	3,4	16,9	1,0	169	99	6.88527e-09	1.03987e-05	0.0,0.227	0.904,1.0	-0.838
ENSG00000156427	FGF18	chr5	+	171449146	171449253	171436092	171436273	171456538	171457626	18511	0,1	1,1	1,2	0,0	206	99	0.000244304	0.0300204	0.0,0.325	1.0,1.0	-0.838
ENSG00000106070	GRB10	chr7	-	50727792	50727890	50674650	50674658	50793223	50793313	80479	0,1	1,1	2,3	0,0	197	99	0.000280634	0.032897	0.0,0.334	1.0,1.0	-0.833
ENSG00000240922	LSAMP-AS1	chr3	+	116367941	116368035	116360023	116360093	116368142	116368271	75003	1,0	1,2	2,3	0,0	193	99	2.91588e-06	0.00112049	0.339,0.0	1.0,1.0	-0.831
ENSG00000196704	AMZ2	chr17	+	68249010	68249096	68248503	68248705	68250359	68250470	16720	2,0	2,2	1,5	0,0	185	99	1.88924e-06	0.000801045	0.349,0.0	1.0,1.0	-0.826
ENSG00000122490	SLC66A2	chr18	-	79930227	79930311	79903577	79904183	79933968	79934022	34535	2,0	2,2	1,4	0,0	183	99	2.02329e-06	0.000836922	0.351,0.0	1.0,1.0	-0.825
ENSG00000272763	AC103702.2	chr17	-	48636867	48636993	48636545	48636773	48639085	48639110	47428	1,1	2,2	2,1	0,0	225	99	1.03176e-06	0.000503792	0.18,0.18	1.0,1.0	-0.82
ENSG00000139990	DCAF5	chr14	-	69149430	69149503	69122216	69122360	69152413	69152599	7652	0,0	1,1	2,3	0,1	172	99	6.47941e-07	0.000356598	0.0,0.0	1.0,0.633	-0.817
ENSG00000183060	LYSMD4	chr15	-	99731172	99731198	99727400	99729731	99731717	99732007	48476	0,0	2,2	2,1	1,0	125	99	0.000117508	0.0178717	0.0,0.0	0.613,1.0	-0.806
ENSG00000264067	AC005291.1	chr17	+	10324842	10324967	10320391	10320512	10341063	10341458	52357	0,3	1,3	15,3	1,0	224	99	2.3219e-05	0.00539403	0.0,0.307	0.869,1.0	-0.781
ENSG00000229855	AC008568.1	chr5	+	121324040	121324070	121313976	121314204	121325421	121325480	83372	0,0	2,2	3,5	0,3	129	99	5.96958e-08	5.56758e-05	0.0,0.0	1.0,0.561	-0.78
ENSG00000163870	TPRA1	chr3	-	127575748	127575809	127575184	127575265	127576616	127576696	37749	0,0	1,1	1,2	0,1	160	99	0.000339866	0.0380312	0.0,0.0	1.0,0.553	-0.776
ENSG00000272556	GTF2IP13	chr7	+	45797042	45797140	45795074	45795198	45797477	45797674	72848	2,1	3,2	12,5	0,0	197	99	3.09571e-07	0.000206334	0.251,0.201	1.0,1.0	-0.774
ENSG00000175600	SUGCT	chr7	+	40684055	40684133	40496283	40496386	40749433	40749497	2478	0,0	2,3	2,2	1,0	177	99	1.99485e-05	0.00485204	0.0,0.0	0.528,1.0	-0.764
ENSG00000168826	ZBTB49	chr4	+	4313040	4313114	4302310	4303091	4320639	4320697	13733	0,5	2,3	9,14	0,0	173	99	7.33701e-06	0.00223699	0.0,0.488	1.0,1.0	-0.756
ENSG00000181626	ANKRD62	chr18	+	12099614	12099682	12097639	12097777	12103157	12103228	54682	0,0	4,1	5,3	3,0	167	99	1.12166e-06	0.000531699	0.0,0.0	0.497,1.0	-0.748
ENSG00000167601	AXL	chr19	+	41239693	41239720	41239163	41239314	41242882	41243015	41475	0,1	2,2	4,4	0,1	126	99	9.65464e-07	0.00047862	0.0,0.282	1.0,0.759	-0.738
ENSG00000142599	RERE	chr1	-	8423166	8423247	8422726	8422807	8423560	8423666	10417	2,0	1,2	5,3	0,0	180	99	0.000175375	0.023777	0.524,0.0	1.0,1.0	-0.738
ENSG00000171843	MLLT3	chr9	-	20380206	20380327	20365668	20365744	20382380	20382452	19747	0,0	3,2	4,4	0,2	220	99	1.30589e-06	0.00058894	0.0,0.0	1.0,0.474	-0.737
ENSG00000131778	CHD1L	chr1	+	147259836	147259918	147242696	147242830	147265931	147266087	26064	0,0	1,2	3,2	2,0	181	99	0.000213259	0.0276436	0.0,0.0	0.451,1.0	-0.726
ENSG00000105204	DYRK1B	chr19	-	39826951	39826987	39826671	39826867	39827284	39827425	45495	1,1	1,5	4,4	0,0	135	99	1.14082e-08	1.48174e-05	0.423,0.128	1.0,1.0	-0.725
ENSG00000144357	UBR3	chr2	+	170014814	170014865	170013840	170013972	170015280	170015366	89486	0,0	1,2	3,5	1,1	150	99	9.61377e-08	8.31871e-05	0.0,0.0	0.664,0.767	-0.716
ENSG00000048991	R3HDM1	chr2	+	135565736	135565925	135531454	135531633	135568757	135568809	40595	0,1	2,4	6,12	2,0	288	99	2.99402e-06	0.00114375	0.0,0.079	0.508,1.0	-0.715
ENSG00000268362	AC092279.1	chr19	+	24063815	24063941	24049404	24049548	24065462	24065679	55323	3,1	2,2	5,2	0,0	225	99	2.32566e-05	0.00539403	0.398,0.18	1.0,1.0	-0.711
ENSG00000256128	LINC00944	chr12	-	126760931	126761057	126747930	126748127	126770192	126770254	2327	0,1	2,1	6,4	1,0	225	99	1.28845e-06	0.000585135	0.0,0.306	0.725,1.0	-0.71
ENSG00000135976	ANKRD36	chr2	+	97198585	97198658	97198462	97198491	97200333	97200362	38630	2,8	5,10	19,10	1,0	172	99	6.75023e-09	1.03987e-05	0.187,0.315	0.916,1.0	-0.707
ENSG00000035115	SH3YL1	chr2	-	256206	256690	253004	253115	260084	261323	58464	3,3	4,2	15,9	1,0	583	99	4.97341e-06	0.00166827	0.113,0.203	0.718,1.0	-0.701
ENSG00000248161	AC098487.1	chr4	-	102419696	102419794	102418601	102418988	102430396	102430498	14885	3,0	1,2	7,2	0,0	197	99	0.000659197	0.0589681	0.601,0.0	1.0,1.0	-0.7
ENSG00000248309	MEF2C-AS1	chr5	+	89150723	89150777	89150532	89150595	89168249	89168668	57455	0,0	1,1	1,5	1,0	153	99	1.34716e-06	0.000599227	0.0,0.0	0.393,1.0	-0.697
ENSG00000213064	SFT2D2	chr1	+	168235100	168235182	168231513	168231600	168236711	168236770	39874	3,0	1,2	3,7	0,0	181	99	0.00094818	0.0750021	0.621,0.0	1.0,1.0	-0.69
ENSG00000226696	LENG8-AS1	chr19	-	54447194	54447260	54445283	54445514	54448164	54448602	68155	1,0	1,1	2,5	0,1	165	99	0.000488282	0.0481184	0.375,0.0	1.0,0.75	-0.688
ENSG00000268362	AC092279.1	chr19	+	24057930	24058230	24049404	24049548	24065462	24066726	55321	1,9	2,2	14,4	0,0	399	99	5.66127e-05	0.0105952	0.11,0.528	1.0,1.0	-0.681
ENSG00000161970	RPL26	chr17	-	8381997	8382090	8379795	8379936	8383156	8383192	33086	0,1	1,1	8,4	2,0	192	99	0.000293455	0.0339707	0.0,0.34	0.673,1.0	-0.666
ENSG00000205746	AC126755.1	chr16	-	18352211	18352283	18351773	18351943	18352404	18352476	40106	1,0	2,1	2,2	1,0	171	99	2.63913e-05	0.00596004	0.224,0.0	0.537,1.0	-0.656
ENSG00000220804	LINC01881	chr2	+	242130654	242130866	242118964	242119057	242138783	242138888	15084	0,1	1,4	5,3	3,0	311	99	0.000694175	0.0612516	0.0,0.074	0.347,1.0	-0.636
ENSG00000232884	AF127936.1	chr21	-	14753323	14753394	14746759	14748375	14753800	14753848	84259	2,2	2,2	11,7	0,0	170	99	1.75958e-05	0.00448121	0.368,0.368	1.0,1.0	-0.632
ENSG00000251209	LINC00923	chr15	-	97756404	97756549	97755742	97755849	97758489	97758661	40919	1,3	1,3	13,13	1,0	244	99	2.74821e-05	0.00615428	0.289,0.289	0.841,1.0	-0.631
ENSG00000235944	ZNF815P	chr7	+	5831180	5831283	5823159	5823526	5833526	5833568	49023	2,4	3,2	5,1	0,0	202	99	5.04769e-06	0.00166827	0.246,0.495	1.0,1.0	-0.629
ENSG00000268362	AC092279.1	chr19	+	24057930	24058300	24049404	24049548	24065462	24065830	55322	3,10	2,2	17,11	0,0	469	99	0.000102349	0.0161966	0.24,0.513	1.0,1.0	-0.623
ENSG00000229140	CCDC26	chr8	-	129276784	129276919	129267779	129267863	129370306	129370377	71775	4,3	2,3	15,16	0,0	234	99	3.37371e-06	0.00123783	0.458,0.297	1.0,1.0	-0.623
ENSG00000244588	RAD21L1	chr20	+	1240320	1240434	1239311	1239407	1242618	1242845	80407	1,0	1,1	8,7	1,1	213	99	0.000372928	0.0404319	0.317,0.0	0.788,0.765	-0.618
ENSG00000012061	ERCC1	chr19	-	45449172	45449244	45423269	45423381	45478735	45478828	77667	0,1	6,3	16,11	3,4	171	99	3.07181e-07	0.000206334	0.0,0.162	0.755,0.614	-0.604
ENSG00000196118	CCDC189	chr16	-	30759653	30759809	30759341	30759444	30760283	30760668	18265	2,3	1,2	5,4	0,0	255	99	0.000226315	0.0286498	0.437,0.368	1.0,1.0	-0.598
ENSG00000286208	AC093838.1	chr2	+	131557350	131557463	131555006	131555184	131564860	131568599	77272	3,0	1,5	6,7	0,1	212	99	2.73698e-05	0.00615035	0.583,0.0	1.0,0.766	-0.592
ENSG00000158711	ELK4	chr1	-	205603200	205603353	205598454	205598649	205616477	205616644	65401	1,2	2,2	6,4	0,1	252	99	0.000111069	0.0172149	0.164,0.282	1.0,0.611	-0.583
ENSG00000090975	PITPNM2	chr12	-	122991754	122991898	122990544	122990709	122992498	122992669	45677	2,0	4,1	6,4	1,1	243	99	0.000435942	0.044938	0.169,0.0	0.71,0.62	-0.581
ENSG00000152763	WDR78	chr1	-	66874780	66874937	66870804	66871509	66891153	66891266	56314	2,6	1,3	3,10	0,0	256	99	5.91625e-05	0.0108842	0.436,0.436	1.0,1.0	-0.564
ENSG00000215158	AC138409.2	chr5	-	34219916	34219950	34218294	34218450	34244615	34244698	67285	0,0	1,2	3,2	1,2	133	99	0.000103943	0.0163445	0.0,0.0	0.691,0.427	-0.559
ENSG00000182511	FES	chr15	+	90890981	90891191	90890400	90890484	90891553	90891676	53471	0,0	2,1	11,8	1,5	309	99	8.16315e-07	0.000431001	0.0,0.0	0.779,0.339	-0.559
ENSG00000160471	COX6B2	chr19	-	55351698	55351890	55350412	55350800	55352080	55352326	76359	1,2	2,2	4,3	0,1	291	99	0.000518698	0.050261	0.145,0.254	1.0,0.505	-0.553
ENSG00000237638	LINC02245	chr2	-	64970571	64970785	64955892	64955984	65047953	65048179	90619	0,6	3,1	10,1	1,0	313	99	0.000433503	0.0448289	0.0,0.655	0.76,1.0	-0.552
ENSG00000179950	PUF60	chr8	-	143827384	143827536	143824312	143824399	143828983	143829044	86280	3,1	4,3	9,10	1,2	251	99	0.000511986	0.0497001	0.228,0.116	0.78,0.664	-0.55
ENSG00000188897	AC099489.1	chr16	-	11471653	11471817	11469507	11469667	11475623	11475715	28191	4,5	2,2	4,6	0,0	263	99	8.83019e-05	0.0144083	0.43,0.485	1.0,1.0	-0.542
ENSG00000248685	LINC02484	chr4	-	34121260	34121455	34120089	34121141	34125800	34125862	51356	8,1	10,1	15,13	2,1	294	99	8.41617e-05	0.0140144	0.212,0.252	0.716,0.814	-0.533
ENSG00000173402	DAG1	chr3	+	49492822	49492973	49488697	49488745	49510418	49510516	63226	2,1	1,2	5,8	1,0	250	99	0.000271195	0.0322563	0.442,0.165	0.664,1.0	-0.529
ENSG00000103852	TTC23	chr15	-	99241364	99241559	99228532	99228732	99249170	99249581	49329	5,1	1,3	11,10	1,0	294	99	0.000200554	0.0263651	0.627,0.101	0.787,1.0	-0.529
ENSG00000105662	CRTC1	chr19	+	18768484	18768793	18765403	18765528	18774899	18774986	38454	7,4	2,1	14,1	0,0	408	99	0.000392505	0.0420063	0.459,0.493	1.0,1.0	-0.524
ENSG00000160766	GBAP1	chr1	-	155218387	155218479	155217239	155218049	155218847	155218943	78071	6,2	1,4	3,4	0,0	191	99	0.000157001	0.0219269	0.757,0.206	1.0,1.0	-0.518
ENSG00000106477	CEP41	chr7	-	130426645	130426759	130421852	130422007	130427954	130428018	72138	0,0	2,2	8,4	2,3	213	99	3.72884e-07	0.000235105	0.0,0.0	0.65,0.383	-0.516
ENSG00000164037	SLC9B1	chr4	-	102989799	102989941	102932123	102932299	102991642	102991712	34354	0,0	2,2	5,5	2,2	241	99	6.35614e-06	0.00196562	0.0,0.0	0.507,0.507	-0.507
ENSG00000243176	AC092944.1	chr3	+	157284977	157286341	157239589	157239799	157315810	157316145	61599	4,0	0,2	12,1	0,0	1463	99	0.000279894	0.032897	1.0,0.0	1.0,1.0	-0.5
ENSG00000139626	ITGB7	chr12	-	53201146	53201194	53200242	53200446	53207201	53207281	21717	1,0	0,6	1,6	0,0	147	99	0.000506752	0.049488	1.0,0.0	1.0,1.0	-0.5
ENSG00000205628	LINC01446	chr7	-	53692330	53692473	53691185	53692089	53771433	53771607	85236	1,0	1,5	2,5	2,0	242	99	0.000641698	0.0581216	0.29,0.0	0.29,1.0	-0.5
ENSG00000126653	NSRP1	chr17	+	30163066	30163162	30117301	30117332	30172541	30172598	91676	5,2	2,4	14,15	1,1	195	99	0.000968763	0.0758907	0.559,0.202	0.877,0.884	-0.5
ENSG00000175287	PHYHD1	chr9	+	128937756	128937944	128936582	128936645	128941444	128941571	37833	0,1	2,0	1,3	0,0	287	99	0.000953824	0.075088	0.0,1.0	1.0,1.0	-0.5
ENSG00000135845	PIGC	chr1	-	172378130	172378258	172376553	172376636	172386780	172386957	89010	1,0	1,1	4,1	0,1	227	99	0.000112913	0.0173352	0.304,0.0	1.0,0.304	-0.5
ENSG00000243970	PPIEL	chr1	-	39525698	39525848	39523806	39523896	39529054	39529164	16655	1,0	0,2	2,2	0,0	249	99	0.00140214	0.096154	1.0,0.0	1.0,1.0	-0.5
ENSG00000105221	AKT2	chr19	-	40268583	40268685	40265221	40265351	40269422	40269540	66591	1,0	2,2	17,13	5,5	201	99	8.78492e-05	0.0144083	0.198,0.0	0.626,0.562	-0.495
ENSG00000236548	RNF217-AS1	chr6	-	124945298	124945439	124941389	124941524	124947930	124948098	76015	0,0	2,3	2,11	4,1	240	99	0.000114221	0.0174947	0.0,0.0	0.171,0.819	-0.495
ENSG00000010270	STARD3NL	chr7	+	38198210	38198365	38179089	38179145	38201713	38201966	78823	0,0	2,1	2,3	1,1	254	99	0.000448388	0.0456335	0.0,0.0	0.438,0.539	-0.489
ENSG00000069493	CLEC2D	chr12	+	9693033	9693115	9692827	9692931	9694759	9695129	72436	1,0	3,3	10,2	1,3	181	99	0.000298362	0.034355	0.154,0.0	0.845,0.267	-0.479
ENSG00000140526	ABHD2	chr15	+	89090282	89090372	89088429	89088563	89102499	89102576	5450	0,1	1,2	7,3	3,1	189	99	0.000481945	0.0477839	0.0,0.208	0.55,0.611	-0.477
ENSG00000274536	MIR223HG	chrX	+	66017064	66017189	66015460	66015551	66018823	66020422	57540	3,2	5,2	5,2	0,1	224	99	0.000727998	0.0630369	0.21,0.307	1.0,0.469	-0.476
ENSG00000010361	FUZ	chr19	-	49808114	49808159	49806884	49807374	49808413	49808491	84117	0,3	8,15	8,14	5,8	144	99	4.39725e-06	0.00152709	0.0,0.121	0.524,0.546	-0.475
ENSG00000182973	CNOT10	chr3	+	32765049	32765177	32764681	32764809	32773456	32773616	73006	4,4	3,2	8,3	1,0	227	99	0.000619328	0.0569677	0.368,0.466	0.777,1.0	-0.472
ENSG00000007516	BAIAP3	chr16	+	1346846	1346955	1346604	1346684	1347297	1347369	87604	4,3	2,2	11,4	1,0	208	99	0.000624116	0.0571866	0.488,0.417	0.84,1.0	-0.467
ENSG00000074201	CLNS1A	chr11	-	77612297	77612370	77611314	77611374	77619605	77619695	18643	2,5	4,1	14,19	1,0	172	99	0.000279753	0.032897	0.223,0.742	0.89,1.0	-0.463
ENSG00000100784	RPS6KA5	chr14	-	90919279	90919466	90906148	90906299	90920205	90920309	89563	2,4	4,4	10,20	2,3	286	99	0.00083448	0.067996	0.148,0.257	0.634,0.698	-0.463
ENSG00000141127	PRPSAP2	chr17	+	18857783	18857853	18856340	18856429	18865468	18865564	4222	1,0	1,1	4,10	3,1	169	99	0.0011481	0.0843738	0.369,0.0	0.439,0.854	-0.462
ENSG00000285899	AL023574.1	chrX	+	43404997	43405066	43395284	43395394	43405885	43406016	19457	1,0	3,4	2,4	1,2	168	99	0.000256785	0.0309966	0.164,0.0	0.541,0.541	-0.459
ENSG00000187097	ENTPD5	chr14	-	74007695	74007812	73987885	73988172	74011090	74011150	38271	1,1	8,7	9,7	6,2	216	99	4.06433e-05	0.00837924	0.054,0.061	0.407,0.616	-0.454
ENSG00000149300	C11orf52	chr11	+	111925652	111925714	111924244	111924363	111925959	111926379	16556	2,10	4,1	6,11	0,0	161	99	0.0013997	0.0960883	0.235,0.86	1.0,1.0	-0.453
ENSG00000224893	LINC02840	chr6	-	152805005	152805128	152759981	152760084	152831052	152831393	69019	2,1	4,4	7,14	3,3	222	99	0.000730714	0.0630828	0.182,0.1	0.51,0.675	-0.452
ENSG00000123106	CCDC91	chr12	+	28226139	28226199	28225794	28225861	28257201	28257245	16999	5,8	6,4	16,13	1,1	159	99	0.000252486	0.0306485	0.342,0.555	0.909,0.89	-0.451
ENSG00000111860	CEP85L	chr6	-	118652699	118652808	118632452	118632611	118710035	118710075	68071	5,10	8,2	20,25	2,0	208	99	0.000364586	0.0398602	0.229,0.704	0.826,1.0	-0.447
ENSG00000069943	PIGB	chr15	+	55324779	55324834	55319272	55319413	55327530	55327635	5734	0,1	2,2	4,2	2,1	154	99	0.000425274	0.0444075	0.0,0.243	0.563,0.563	-0.441
ENSG00000163939	PBRM1	chr3	-	52682091	52682233	52679573	52679723	52685748	52685850	1721	3,6	5,1	9,17	1,0	241	99	0.000230465	0.0288936	0.198,0.711	0.787,1.0	-0.439
ENSG00000166153	DEPDC4	chr12	-	100242485	100242569	100237967	100238117	100248899	100248978	77635	0,1	1,2	5,12	4,3	183	99	0.000606862	0.0563012	0.0,0.213	0.403,0.684	-0.437
ENSG00000168826	ZBTB49	chr4	+	4315808	4315970	4301988	4303091	4320639	4321398	13735	5,14	2,3	20,42	0,0	261	99	0.000136012	0.0197604	0.487,0.639	1.0,1.0	-0.437
ENSG00000106701	FSD1L	chr9	+	105479353	105479376	105471903	105472005	105484380	105484502	1754	0,0	1,2	2,4	3,3	122	99	3.01682e-05	0.00664129	0.0,0.0	0.351,0.52	-0.435
ENSG00000173480	ZNF417	chr19	-	57915337	57915531	57912059	57912186	57916378	57916577	8028	1,0	4,1	9,6	2,4	293	99	0.000124798	0.0186686	0.078,0.0	0.603,0.336	-0.431
ENSG00000031823	RANBP3	chr19	-	5950716	5950872	5941798	5941835	5951392	5951596	56500	9,8	7,4	16,17	1,2	255	99	0.00097728	0.0761903	0.333,0.437	0.861,0.767	-0.429
ENSG00000222004	LINC02860	chr7	+	26640695	26640764	26638456	26639344	26646299	26647270	25022	1,0	1,2	7,1	0,2	168	99	0.000974991	0.0761032	0.371,0.0	1.0,0.228	-0.428
ENSG00000055917	PUM2	chr2	-	20332966	20333063	20327309	20327378	20350809	20350834	12312	1,2	3,6	8,10	3,4	196	99	0.00133069	0.092524	0.144,0.144	0.574,0.558	-0.422
ENSG00000174628	IQCK	chr16	+	19763847	19764112	19733697	19733827	19788837	19788922	12809	5,10	2,2	10,17	0,1	364	99	0.00134562	0.0933627	0.405,0.576	1.0,0.822	-0.421
ENSG00000093167	LRRFIP2	chr3	-	37072789	37072882	37066223	37066325	37075023	37075116	77322	3,4	2,3	3,4	0,1	192	99	0.00118168	0.0863471	0.436,0.407	1.0,0.673	-0.415
ENSG00000145414	NAF1	chr4	-	163158224	163158327	163156963	163157454	163164216	163164391	86629	9,19	9,10	48,43	5,5	202	99	6.91952e-05	0.0122111	0.329,0.482	0.825,0.808	-0.411
ENSG00000129535	NRL	chr14	-	24084519	24084745	24082653	24082875	24114721	24115010	31485	7,10	1,3	27,20	0,0	325	99	0.00145971	0.0981329	0.681,0.504	1.0,1.0	-0.407
ENSG00000134864	GGACT	chr13	-	100533562	100533774	100530182	100532601	100583824	100583997	35030	0,0	2,3	6,2	1,4	311	99	0.00109173	0.0816999	0.0,0.0	0.656,0.137	-0.397
ENSG00000111596	CNOT2	chr12	+	70297758	70297879	70278131	70278274	70301704	70301865	68042	0,0	4,1	4,6	4,3	220	99	3.22085e-06	0.00120745	0.0,0.0	0.31,0.474	-0.392
ENSG00000154845	PPP4R1	chr18	-	9584514	9584580	9577063	9577191	9588088	9588235	29967	0,0	2,6	5,1	2,3	165	99	0.000804726	0.0670007	0.0,0.0	0.6,0.167	-0.384
ENSG00000151665	PIGF	chr2	-	46591802	46591925	46588074	46588179	46592474	46592583	12980	13,6	10,9	40,36	8,8	222	99	0.000375643	0.0405907	0.367,0.229	0.69,0.667	-0.381
ENSG00000110888	CAPRIN2	chr12	-	30720810	30720915	30716507	30716676	30723258	30723314	70538	9,9	5,5	38,39	5,2	204	99	0.00126505	0.0894184	0.466,0.466	0.787,0.904	-0.38
ENSG00000119715	ESRRB	chr14	+	76404395	76404459	76310711	76310916	76407542	76407596	62218	0,0	3,1	3,4	4,3	163	99	1.97451e-05	0.00482063	0.0,0.0	0.313,0.447	-0.38
ENSG00000148700	ADD3	chr10	+	110079239	110079297	110077004	110077118	110100624	110100704	61323	0,0	4,4	5,12	5,13	157	99	6.19538e-06	0.00193013	0.0,0.0	0.387,0.368	-0.378
ENSG00000111843	TMEM14C	chr6	+	10724960	10725037	10723124	10723241	10728639	10728727	17547	0,1	3,8	11,4	10,3	176	99	3.03993e-05	0.00665908	0.0,0.066	0.382,0.429	-0.372
ENSG00000254979	AP000781.2	chr11	-	57399495	57399566	57389886	57389956	57409174	57409298	50563	0,0	2,2	6,3	3,7	170	99	7.42195e-06	0.00225232	0.0,0.0	0.538,0.2	-0.369
ENSG00000175309	PHYKPL	chr5	-	178222851	178222934	178214795	178214885	178229939	178230073	77032	0,0	1,1	2,6	4,3	182	99	1.6805e-05	0.00431363	0.0,0.0	0.214,0.521	-0.367
ENSG00000196967	ZNF585A	chr19	-	37165594	37165696	37156228	37156355	37169838	37170054	56691	19,14	5,6	23,26	1,0	201	99	8.17142e-06	0.00240121	0.652,0.535	0.919,1.0	-0.366
ENSG00000105483	CARD8	chr19	-	48249750	48249878	48240961	48241063	48255791	48255911	90747	8,9	4,2	14,21	1,0	227	99	0.000207107	0.0270079	0.466,0.662	0.859,1.0	-0.365
ENSG00000160613	PCSK7	chr11	-	117207653	117207735	117207066	117207160	117207969	117208064	2659	4,10	7,11	26,31	7,10	181	99	0.0010801	0.0810913	0.238,0.332	0.67,0.629	-0.364
ENSG00000188672	RHCE	chr1	-	25411339	25411478	25408682	25408869	25428952	25429049	29449	0,0	2,1	6,5	4,4	238	99	4.69919e-05	0.00916441	0.0,0.0	0.384,0.342	-0.363
ENSG00000223546	LINC00630	chrX	+	102843328	102843407	102839800	102839863	102845856	102846020	17730	1,0	1,3	3,3	1,2	178	99	0.00139031	0.0957175	0.357,0.0	0.625,0.455	-0.362
ENSG00000145833	DDX46	chr5	+	134789215	134789264	134788512	134788591	134790105	134790222	89799	1,4	15,10	37,29	25,22	148	99	3.07119e-05	0.00669292	0.043,0.211	0.497,0.469	-0.356
ENSG00000134490	TMEM241	chr18	-	23370215	23370261	23356593	23356663	23371421	23371470	47858	8,6	1,5	7,7	0,0	145	99	0.000244538	0.0300204	0.845,0.45	1.0,1.0	-0.353
ENSG00000224817	AC010789.1	chr10	-	101708164	101708401	101701993	101702295	101729716	101730037	42217	4,2	6,8	19,11	4,6	336	99	0.000987058	0.0766241	0.164,0.069	0.583,0.351	-0.35
ENSG00000259972	AC009120.2	chr16	-	74306254	74306421	74305255	74305580	74332566	74332613	26562	16,11	6,1	39,49	0,0	266	99	9.42555e-06	0.00268471	0.498,0.804	1.0,1.0	-0.349
ENSG00000056998	GYG2	chrX	+	2842997	2843090	2830060	2830195	2843212	2843354	73907	0,0	8,5	4,3	6,2	192	99	8.64327e-05	0.0143558	0.0,0.0	0.256,0.436	-0.346
ENSG00000154358	OBSCN	chr1	+	228224458	228224734	228219323	228219599	228243182	228243458	2047	11,25	2,4	34,37	1,0	375	99	0.000204492	0.0267745	0.592,0.623	0.9,1.0	-0.343
ENSG00000101751	POLI	chr18	+	54283742	54283815	54282859	54283015	54283921	54284013	18074	0,1	4,8	3,5	5,3	172	99	0.000245921	0.0301332	0.0,0.067	0.257,0.49	-0.34
ENSG00000281566	AL157778.1	chrX	+	98841940	98842001	98644527	98644574	98864610	98865564	54370	0,1	1,8	4,6	7,4	160	99	0.000386412	0.041547	0.0,0.072	0.261,0.481	-0.335
ENSG00000223553	SMPD4P1	chr22	-	20616309	20616442	20613662	20613735	20621262	20621417	58839	0,0	9,6	9,3	10,2	232	99	3.79418e-06	0.00135385	0.0,0.0	0.277,0.39	-0.334
ENSG00000003096	KLHL13	chrX	-	117983479	117983545	117945433	117945575	118028423	118028495	45264	0,1	3,2	8,6	7,4	165	99	0.000542103	0.0518487	0.0,0.231	0.407,0.474	-0.325
ENSG00000147124	ZNF41	chrX	-	47467409	47467760	47456271	47456398	47482458	47482585	58030	25,30	2,4	28,37	0,0	450	99	5.4641e-05	0.0103455	0.733,0.623	1.0,1.0	-0.322
ENSG00000244754	N4BP2L2	chr13	-	32446358	32446480	32442387	32444126	32480589	32480638	41176	0,0	4,5	13,1	5,4	221	99	4.08867e-05	0.00840273	0.0,0.0	0.538,0.101	-0.32
ENSG00000124570	SERPINB6	chr6	-	2968778	2968913	2955523	2955670	2971532	2972165	9911	9,9	2,3	13,16	1,0	234	99	0.00107815	0.0810383	0.656,0.559	0.846,1.0	-0.316
ENSG00000278202	AC243919.2	chr15	+	82432575	82432631	82431829	82431949	82432816	82432897	55688	0,2	5,5	11,17	14,11	155	99	0.00136862	0.0948569	0.0,0.203	0.334,0.497	-0.314
ENSG00000157036	EXOG	chr3	+	38498925	38498989	38497628	38497684	38501354	38501494	49253	0,1	3,2	6,3	3,4	163	99	0.0010771	0.0810383	0.0,0.233	0.548,0.313	-0.314
ENSG00000106070	GRB10	chr7	-	50780626	50780736	50755886	50756056	50793223	50793437	80519	0,0	2,1	4,2	3,3	209	99	0.000450419	0.0456335	0.0,0.0	0.387,0.24	-0.314
ENSG00000083814	ZNF671	chr19	-	57726907	57727025	57723264	57723340	57727390	57727614	53605	0,1	2,2	8,4	5,3	217	99	0.000731665	0.0630828	0.0,0.186	0.422,0.378	-0.307
ENSG00000133226	SRRM1	chr1	+	24647078	24647208	24646666	24646789	24648858	24649029	85941	76111	156159	391320	153144	229	99	0	0	0.174,0.232	0.525,0.49	-0.305
ENSG00000120910	PPP3CC	chr8	+	22539468	22539498	22532920	22533018	22540614	22541056	19330	30,45	32,28	88,80	20,15	129	99	8.4739e-06	0.00247888	0.418,0.552	0.772,0.804	-0.303
ENSG00000065457	ADAT1	chr16	-	75608223	75608323	75603084	75603171	75612242	75612861	66072	12,8	3,2	30,23	1,0	199	99	0.000654917	0.0588266	0.666,0.666	0.937,1.0	-0.302
ENSG00000198945	L3MBTL3	chr6	+	130049755	130049830	130049281	130049393	130051248	130051408	56576	1,1	8,10	10,14	13,11	174	99	9.2904e-05	0.0149711	0.066,0.054	0.304,0.42	-0.302
ENSG00000078403	MLLT10	chr10	+	21682224	21682257	21681331	21681376	21713771	21713950	82214	17,25	24,29	79,76	32,25	132	99	9.47658e-06	0.00268746	0.347,0.393	0.649,0.695	-0.302
ENSG00000106477	CEP41	chr7	-	130426645	130426759	130416918	130416966	130427954	130428018	72137	0,0	4,1	8,6	5,13	213	99	3.0454e-05	0.00665908	0.0,0.0	0.426,0.177	-0.301
ENSG00000151474	FRMD4A	chr10	-	13693481	13693517	13675037	13675044	13693897	13694039	84574	2,3	13,7	13,19	12,14	135	99	0.00138871	0.0957175	0.101,0.239	0.443,0.499	-0.301
ENSG00000109381	ELF2	chr4	-	139117828	139117950	139116648	139116807	139125163	139125329	86551	1,0	2,3	6,7	3,7	221	99	0.000701966	0.0617054	0.183,0.0	0.473,0.309	-0.299
ENSG00000148773	MKI67	chr10	-	128114927	128116007	128113426	128113602	128116490	128116536	15615	302410	46,53	12181090	42,52	1179	99	9.6158e-11	3.8015e-07	0.355,0.394	0.709,0.638	-0.299
ENSG00000157741	UBN2	chr7	+	139282004	139282055	139279317	139279360	139283023	139284574	82116	15,22	10,5	66,57	1,6	150	99	0.00045644	0.0459567	0.497,0.744	0.978,0.862	-0.299
ENSG00000103599	IQCH	chr15	+	67263121	67263216	67261271	67261394	67344062	67344191	81301	0,0	5,4	2,5	4,4	194	99	0.000107161	0.0167334	0.0,0.0	0.203,0.389	-0.296
ENSG00000241837	ATP5PO	chr21	-	33906727	33906794	33906448	33906500	33907340	33907412	57096	0,1	2,4	8,4	5,8	166	99	0.00106161	0.0801199	0.0,0.13	0.488,0.23	-0.294
ENSG00000171456	ASXL1	chr20	+	32371777	32371874	32369014	32369123	32372163	32372223	53675	4,4	17,17	42,22	20,28	196	99	0.000218265	0.028013	0.106,0.106	0.515,0.284	-0.293
ENSG00000172366	MCRIP2	chr16	+	646471	646608	641845	642043	647416	647544	29185	12,21	14,23	39,35	12,12	236	99	0.000319912	0.0361317	0.264,0.277	0.577,0.55	-0.293
ENSG00000144395	CCDC150	chr2	+	196720173	196720234	196719496	196719666	196720574	196720668	52926	1,2	4,14	8,9	8,8	160	99	0.00119145	0.0867436	0.134,0.081	0.382,0.41	-0.288
ENSG00000112685	EXOC2	chr6	-	689138	689212	679142	679514	693018	693108	36118	13,12	4,2	20,32	0,0	173	99	0.000159991	0.0222487	0.65,0.774	1.0,1.0	-0.288
ENSG00000146530	VWDE	chr7	-	12353814	12354487	12351572	12351713	12356110	12356330	25414	423476	102117	17121645	130120	772	99	5.55112e-16	1.8025e-11	0.347,0.343	0.628,0.637	-0.288
ENSG00000282508	LINC01002	chr19	-	209768	209866	209218	209432	211761	211866	70383	1,1	14,8	12,5	12,5	197	99	4.21646e-05	0.00855704	0.035,0.059	0.334,0.334	-0.287
ENSG00000104835	SARS2	chr19	-	38922001	38922078	38921526	38921596	38922237	38922267	111	0,0	3,3	2,8	10,5	176	99	6.02308e-05	0.0109366	0.0,0.0	0.101,0.474	-0.287
ENSG00000175203	DCTN2	chr12	-	57538518	57538524	57535748	57535845	57547027	57547141	77794	1,1	13,15	8,7	24,8	105	99	0.00102997	0.0789711	0.068,0.059	0.239,0.452	-0.282
ENSG00000134982	APC	chr5	+	112738352	112738460	112737894	112737925	112754872	112755025	55340	0,0	18,12	11,2	5,19	207	99	0.000544462	0.0519214	0.0,0.0	0.513,0.048	-0.281
ENSG00000165584	SSX3	chrX	-	48349539	48349587	48347499	48347604	48349986	48350122	26668	20,26	25,25	56,45	18,17	147	99	0.000141018	0.0203043	0.35,0.412	0.677,0.641	-0.278
ENSG00000100697	DICER1	chr14	-	95141153	95141187	95140658	95140759	95141682	95141748	75574	0,0	7,6	4,6	7,13	133	99	3.21625e-05	0.00691622	0.0,0.0	0.298,0.256	-0.277
ENSG00000090924	PLEKHG2	chr19	+	39420948	39420996	39420750	39420852	39421074	39421113	12749	18,24	9,14	60,52	9,7	147	99	0.00054296	0.0518543	0.574,0.536	0.818,0.833	-0.27
ENSG00000102312	PORCN	chrX	+	48512834	48512852	48512588	48512719	48514239	48514365	14148	1,0	2,12	8,7	8,10	117	99	0.000127931	0.0189682	0.297,0.0	0.458,0.372	-0.267
ENSG00000197647	ZNF433	chr19	-	12021929	12022189	12018190	12018292	12035536	12035741	64126	0,0	4,3	5,4	3,4	359	99	5.28414e-05	0.0101228	0.0,0.0	0.315,0.216	-0.266
ENSG00000115504	EHBP1	chr2	+	62987930	62988038	62979187	62979335	62990715	62990840	49591	25,41	8,9	120,98	4,7	207	99	0.000214046	0.0276904	0.599,0.685	0.935,0.87	-0.261
ENSG00000124786	SLC35B3	chr6	-	8418743	8418885	8417401	8417494	8419579	8419677	19344	6,4	25,27	26,37	35,20	241	99	2.01958e-05	0.00489386	0.09,0.057	0.234,0.432	-0.26
ENSG00000178927	CYBC1	chr17	-	82447579	82447621	82445863	82445960	82449169	82449292	46383	15,18	8,3	23,28	1,1	141	99	0.000769497	0.0651534	0.568,0.808	0.942,0.952	-0.259
ENSG00000011454	RABGAP1	chr9	+	122945331	122945432	122941089	122941093	122957010	122957209	26543	0,0	2,2	3,4	5,5	200	99	0.000533286	0.0514602	0.0,0.0	0.229,0.284	-0.257
ENSG00000197948	FCHSD1	chr5	-	141642396	141642503	141641701	141641757	141643000	141643088	77416	7,13	16,19	42,34	21,21	206	99	0.000840593	0.0683226	0.174,0.247	0.49,0.438	-0.253
ENSG00000163291	PAQR3	chr4	-	78922828	78922983	78922140	78922421	78923856	78923947	61249	0,0	2,5	5,3	5,4	254	99	0.000224773	0.028566	0.0,0.0	0.28,0.226	-0.253
ENSG00000180900	SCRIB	chr8	-	143791665	143791740	143791388	143791440	143791875	143791913	7174	0,4	33,29	39,21	43,38	174	99	1.22658e-08	1.5619e-05	0.0,0.073	0.34,0.239	-0.253
ENSG00000163554	SPTA1	chr1	-	158618038	158618056	158617536	158617588	158619221	158619334	67965	91101	56,57	409413	52,79	117	99	5.411e-12	3.33293e-08	0.579,0.6	0.869,0.816	-0.253
ENSG00000178386	ZNF223	chr19	+	44063264	44063566	44060748	44060841	44066063	44066219	42854	0,1	2,0	3,4	0,1	401	99	0.000475311	0.0472706	0.0,1.0	1.0,0.497	-0.248
ENSG00000115020	PIKFYVE	chr2	+	208276711	208276830	208273583	208273733	208285725	208285933	11307	31,39	4,10	74,65	1,2	218	99	6.42025e-05	0.0114545	0.779,0.639	0.971,0.937	-0.245
ENSG00000152061	RABGAP1L	chr1	+	174957890	174958173	174957456	174957549	174969276	174969387	76861	41,46	27,16	145172	24,31	382	99	0.00059965	0.0557117	0.282,0.427	0.61,0.59	-0.245
ENSG00000165219	GAPVD1	chr9	+	125335171	125335252	125332509	125332629	125337017	125337095	35769	26,15	76101	135130	131127	180	99	1.54281e-11	8.34943e-08	0.158,0.076	0.362,0.36	-0.244
ENSG00000072071	ADGRL1	chr19	-	14152132	14152222	14151207	14151615	14152308	14152437	2682	15,22	4,2	19,24	0,0	189	99	0.00067185	0.0597689	0.663,0.852	1.0,1.0	-0.242
ENSG00000205581	HMGN1	chr21	-	39347378	39347478	39345829	39345958	39348291	39348339	39694	43,26	20,18	100108	17,26	199	99	0.00123735	0.0881093	0.517,0.418	0.745,0.674	-0.242
ENSG00000204147	ASAH2B	chr10	+	50743672	50743741	50742914	50743010	50745127	50745274	62034	0,1	3,5	5,7	9,8	168	99	0.000814929	0.0675624	0.0,0.105	0.247,0.34	-0.241
ENSG00000150756	ATPSCKMT	chr5	-	10235210	10235261	10225506	10227647	10236477	10236615	29209	42,32	30,27	80,56	20,18	150	99	0.000257333	0.031005	0.48,0.439	0.725,0.672	-0.239
ENSG00000232931	LINC00342	chr2	-	95813315	95813957	95807051	95807302	95814049	95815156	42758	34,36	17,22	107124	28,15	741	99	0.00133833	0.092956	0.211,0.179	0.338,0.525	-0.236
ENSG00000173889	PHC3	chr3	-	170128339	170128387	170122590	170122744	170128683	170128807	53993	0,1	7,16	14,12	24,27	147	99	1.45181e-05	0.00387998	0.0,0.04	0.282,0.23	-0.236
ENSG00000231527	FAM27C	chr9	+	61920281	61920435	61917467	61917607	61972189	61973358	63380	1,0	2,2	7,5	5,5	253	99	0.00145809	0.0981329	0.164,0.0	0.354,0.281	-0.235
ENSG00000079805	DNM2	chr19	+	10808568	10808580	10805915	10805967	10812263	10812377	24169	104127	63,89	429296	88,62	111	99	8.73096e-11	3.78004e-07	0.596,0.56	0.813,0.81	-0.233
ENSG00000196459	TRAPPC2	chrX	-	13734043	13734185	13719870	13719982	13734524	13734620	15645	38,46	38,42	156119	48,50	241	99	2.23318e-05	0.0052546	0.291,0.31	0.572,0.494	-0.232
ENSG00000089063	TMEM230	chr20	-	5111763	5111808	5109331	5109445	5112742	5112904	38205	0,1	3,6	10,3	10,11	144	99	0.00114769	0.0843738	0.0,0.103	0.407,0.158	-0.231
ENSG00000148950	IMMP1L	chr11	-	31463171	31463305	31433459	31433570	31509518	31509574	84614	78,73	56,43	167161	51,34	233	99	2.43736e-05	0.00559319	0.372,0.419	0.582,0.668	-0.23
ENSG00000180354	MTURN	chr7	+	30146176	30146299	30134985	30135298	30157437	30162760	40182	31,50	7,12	121109	4,9	222	99	0.000554643	0.0525834	0.664,0.65	0.931,0.844	-0.23
ENSG00000249624	AP000295.1	chr21	+	33262792	33263637	33252661	33252830	33268393	33268517	16145	113109	4,4	311249	2,0	944	99	0.00043949	0.045089	0.748,0.741	0.942,1.0	-0.227
ENSG00000161800	RACGAP1	chr12	-	50018515	50018589	50016630	50016719	50025372	50025435	24868	2,0	7,11	9,11	20,10	173	99	0.000750581	0.0641878	0.141,0.0	0.205,0.386	-0.225
ENSG00000138002	IFT172	chr2	-	27445552	27445629	27445443	27445449	27445744	27445843	89711	5,1	22,49	32,19	31,42	176	99	1.93264e-06	0.00080974	0.113,0.011	0.367,0.203	-0.223
ENSG00000240344	PPIL3	chr2	-	200882341	200882435	200881420	200881488	200885697	200885772	89500	65,78	51,43	161180	36,55	193	99	5.42429e-05	0.0103001	0.395,0.482	0.696,0.627	-0.223
ENSG00000061938	TNK2	chr3	-	195867168	195867264	195866888	195867016	195867360	195868709	52935	38,28	5,7	62,62	1,2	195	99	0.000400378	0.0426251	0.794,0.67	0.969,0.94	-0.222
ENSG00000085982	USP40	chr2	-	233491031	233491071	233489364	233489483	233491166	233491261	38606	0,1	23,19	7,10	22,17	139	99	4.61646e-06	0.00158594	0.0,0.036	0.185,0.295	-0.222
ENSG00000103275	UBE2I	chr16	+	1312346	1312667	1308879	1309419	1314019	1314096	89891	45,41	5,2	102,83	0,1	420	99	0.000188516	0.0251024	0.68,0.829	1.0,0.951	-0.221
ENSG00000008838	MED24	chr17	-	40034915	40034972	40033344	40033456	40035116	40035349	44711	34,33	91,83	125107	103104	156	99	1.24186e-07	0.000102087	0.192,0.201	0.435,0.395	-0.219
ENSG00000083799	CYLD	chr16	+	50744729	50744866	50742761	50742841	50749575	50749798	66046	0,0	3,4	5,2	6,4	236	99	0.000628487	0.0571866	0.0,0.0	0.259,0.173	-0.216
ENSG00000164830	OXR1	chr8	+	106737519	106737600	106713822	106713985	106739457	106739583	67219	18,25	36,32	49,61	37,30	180	99	0.00122807	0.0878938	0.216,0.301	0.421,0.528	-0.216
ENSG00000138778	CENPE	chr4	-	103163478	103163553	103163136	103163256	103174735	103174903	44634	36,32	34,36	89,94	38,40	174	99	0.000329646	0.037102	0.376,0.336	0.571,0.572	-0.215
ENSG00000163660	CCNL1	chr3	-	157156935	157157083	157153035	157153156	157158865	157158951	41024	158135	36,50	522400	63,36	247	99	1.36049e-05	0.0036661	0.638,0.52	0.769,0.817	-0.214
ENSG00000123415	SMUG1	chr12	-	54188514	54188596	54187818	54187905	54188950	54188972	38388	0,1	6,4	10,4	11,8	181	99	0.000412469	0.0437689	0.0,0.12	0.332,0.215	-0.214
ENSG00000127616	SMARCA4	chr19	+	10980776	10980852	10960991	10961174	10984123	10984373	39502	0,0	8,6	6,6	11,15	175	99	5.96508e-05	0.0109122	0.0,0.0	0.236,0.185	-0.21
ENSG00000104907	TRMT1	chr19	-	13109914	13110001	13109768	13109838	13110157	13110306	41116	28,43	31,34	146130	54,55	186	99	0.000494236	0.0484113	0.325,0.402	0.59,0.557	-0.21
ENSG00000090006	LTBP4	chr19	+	40622949	40623021	40622400	40622667	40623603	40623732	86771	73,88	21,56	284207	50,31	171	99	0.00120252	0.0870121	0.668,0.476	0.767,0.794	-0.208
ENSG00000132780	NASP	chr1	+	45607320	45608337	45606481	45606591	45613168	45613248	71992	27663523	826722	1099210711	10221118	1116	99	1.25455e-14	2.71577e-10	0.229,0.302	0.488,0.459	-0.208
ENSG00000180376	CCDC66	chr3	+	56572336	56572428	56571180	56571302	56592969	56593061	80432	3,7	33,26	31,28	41,34	191	99	1.96586e-05	0.00481761	0.045,0.122	0.282,0.299	-0.207
ENSG00000251381	LINC00958	chr11	-	12986039	12986144	12961841	12962763	12989455	12989546	55916	70,75	23,34	228165	24,34	204	99	0.00045907	0.0461501	0.596,0.517	0.822,0.702	-0.206
ENSG00000197978	GOLGA6L9	chr15	+	82432571	82432631	82431829	82431949	82432816	82432897	59041	0,1	5,5	5,9	14,11	159	99	0.00088315	0.07107	0.0,0.111	0.182,0.338	-0.205
ENSG00000109458	GAB1	chr4	+	143391443	143391632	143337177	143337260	143415476	143415771	36260	0,0	14,4	7,10	16,9	288	99	1.25494e-05	0.00342429	0.0,0.0	0.131,0.276	-0.204
ENSG00000148950	IMMP1L	chr11	-	31447982	31449091	31433459	31433570	31509518	31509594	84600	80,87	56,43	245246	51,34	1208	99	2.04932e-08	2.36121e-05	0.105,0.142	0.282,0.372	-0.203
ENSG00000156239	N6AMT1	chr21	-	28879869	28879953	28878191	28878333	28882159	28882250	12688	45,55	14,22	115151	13,22	183	99	0.000732414	0.0630828	0.635,0.575	0.827,0.788	-0.203
ENSG00000145014	TMEM44	chr3	-	194617635	194617776	194617098	194617269	194623223	194623310	79876	0,1	4,4	9,7	8,13	240	99	0.00071562	0.0625489	0.0,0.093	0.317,0.182	-0.203
ENSG00000175054	ATR	chr3	-	142450465	142450602	142449006	142449602	142453127	142453233	4431	15,21	49,52	51,57	49,43	236	99	4.60301e-06	0.00158594	0.114,0.145	0.304,0.357	-0.201
ENSG00000120942	UBIAD1	chr1	+	11293466	11293626	11273888	11274060	11294872	11295183	30158	1,1	3,9	15,7	13,8	259	99	0.000766581	0.0650762	0.113,0.041	0.306,0.251	-0.201
ENSG00000133657	ATP13A3	chr3	-	194412198	194412288	194402676	194406116	194413758	194413839	44782	144156	26,45	421405	29,23	189	99	9.323e-08	8.29389e-05	0.744,0.645	0.884,0.902	-0.199
ENSG00000108854	SMURF2	chr17	-	64606601	64606640	64598381	64598490	64661828	64661928	75883	8,16	1,5	21,25	0,1	138	99	0.001209	0.087015	0.852,0.697	1.0,0.947	-0.199
ENSG00000197965	MPZL1	chr1	+	167776063	167776166	167773235	167773368	167787819	167788012	87728	208170	74,83	445445	81,74	202	99	1.21431e-06	0.00055929	0.579,0.501	0.729,0.747	-0.198
ENSG00000070882	OSBPL3	chr7	-	24849068	24849176	24842278	24842413	24852503	24852634	41246	99115	27,31	175239	18,20	207	99	2.07868e-05	0.00496301	0.637,0.64	0.823,0.851	-0.198
ENSG00000151881	TMEM267	chr5	-	43479889	43479987	43453657	43454043	43483821	43483836	46438	10,8	22,26	46,31	33,36	197	99	0.00143542	0.097306	0.186,0.134	0.412,0.302	-0.197
ENSG00000186814	ZSCAN30	chr18	-	35267475	35267679	35263944	35264455	35290130	35290229	27170	0,0	6,3	5,6	6,9	303	99	0.000109677	0.0170806	0.0,0.0	0.214,0.179	-0.197
ENSG00000102878	HSF4	chr16	+	67167302	67167402	67167119	67167222	67167474	67167599	61047	7,11	35,29	34,21	32,25	199	99	0.000229007	0.0288221	0.09,0.159	0.346,0.295	-0.196
ENSG00000122643	NT5C3A	chr7	-	33035933	33035988	33026816	33026915	33062567	33062796	55155	48,53	48,66	163141	82,71	154	99	7.78007e-05	0.0132265	0.391,0.34	0.561,0.561	-0.196
ENSG00000111907	TPD52L1	chr6	+	125257097	125257158	125248281	125248383	125262833	125263044	49079	26,35	90102	121117	139124	160	99	1.81621e-07	0.000135573	0.152,0.175	0.35,0.369	-0.196
ENSG00000126249	PDCD2L	chr19	+	34404648	34404990	34404424	34404538	34409160	34409510	65990	90,87	7,7	206129	2,3	441	99	0.000821187	0.067677	0.743,0.736	0.959,0.906	-0.193
ENSG00000180902	D2HGDH	chr2	+	241755848	241756014	241744708	241744877	241767709	241767948	4656	32,45	3,6	123,64	2,1	265	99	0.00142353	0.0971059	0.799,0.737	0.958,0.96	-0.191
ENSG00000124177	CHD6	chr20	-	41564010	41564151	41533049	41533570	41618339	41618375	73351	0,2	3,22	8,9	12,15	240	99	0.000229586	0.0288391	0.0,0.036	0.216,0.198	-0.189
ENSG00000081237	PTPRC	chr1	+	198699563	198699704	198692346	198692373	198703297	198703346	86142	84,77	164195	589519	476397	240	99	3.75311e-12	2.70816e-08	0.174,0.14	0.338,0.35	-0.187
ENSG00000104723	TUSC3	chr8	+	15757790	15757855	15748374	15748465	15758029	15758277	43130	45,47	14,8	123,90	4,9	164	99	0.00111129	0.0826684	0.66,0.78	0.949,0.858	-0.183
ENSG00000134490	TMEM241	chr18	-	23421366	23421444	23399565	23399647	23430630	23430677	47880	32,45	7,3	65,69	0,1	177	99	6.72224e-05	0.0118952	0.719,0.894	1.0,0.975	-0.181
ENSG00000168404	MLKL	chr16	-	74676300	74676425	74675617	74675764	74678898	74678980	13737	0,0	7,12	5,7	25,8	224	99	0.000199318	0.0262558	0.0,0.0	0.081,0.279	-0.18
ENSG00000105426	PTPRS	chr19	-	5218786	5218798	5218419	5218532	5219309	5219467	60950	32,46	6,13	104,90	3,2	111	99	3.23513e-06	0.00120745	0.826,0.759	0.969,0.976	-0.18
ENSG00000161914	ZNF653	chr19	-	11500677	11500815	11498295	11498339	11505487	11505500	54952	0,1	3,7	3,7	9,7	237	99	0.00139611	0.0959432	0.0,0.056	0.122,0.295	-0.18
ENSG00000174485	DENND4A	chr15	-	65700543	65700675	65697266	65697383	65701050	65701192	19492	13,17	37,45	53,73	59,58	231	99	6.09916e-05	0.0110332	0.131,0.139	0.278,0.35	-0.179
ENSG00000125458	NT5C	chr17	-	75130964	75131081	75130752	75130867	75131180	75131281	61742	46,43	5,6	114122	3,1	216	99	0.000560393	0.0528201	0.808,0.767	0.946,0.982	-0.176
ENSG00000028203	VEZT	chr12	+	95298861	95298943	95296050	95296258	95300164	95300562	80717	14,4	48,42	35,29	44,53	181	99	0.000174694	0.0237438	0.138,0.05	0.303,0.23	-0.173
ENSG00000159423	ALDH4A1	chr1	-	18876314	18876467	18875381	18875503	18877207	18877255	81429	56,61	10,3	126113	3,1	252	99	0.00109198	0.0816999	0.688,0.889	0.943,0.978	-0.172
ENSG00000091592	NLRP1	chr17	-	5515472	5515517	5501813	5501872	5517745	5517887	84669	21,25	57,71	79,70	93,81	144	99	0.000174764	0.0237438	0.202,0.195	0.369,0.373	-0.172
ENSG00000170581	STAT2	chr12	-	56348923	56349059	56348751	56348804	56349344	56349509	86603	40,47	2,7	129104	0,1	235	99	4.92242e-05	0.00951404	0.894,0.739	1.0,0.978	-0.172
ENSG00000095794	CREM	chr10	+	35137781	35137879	35126809	35127193	35178888	35178986	14242	1,1	20,11	7,7	16,12	197	99	0.000484276	0.0479096	0.025,0.044	0.18,0.227	-0.169
ENSG00000168958	MFF	chr2	+	227352513	227352573	227340291	227340380	227355676	227355761	48236	32,36	95129	151129	176178	159	99	6.98269e-07	0.000377557	0.173,0.148	0.348,0.311	-0.169
ENSG00000141503	MINK1	chr17	+	4890221	4890308	4889646	4889763	4890516	4890735	28037	0,1	14,16	9,3	12,17	186	99	0.000252035	0.0306485	0.0,0.032	0.285,0.086	-0.169
ENSG00000158856	DMTN	chr8	+	22080804	22080870	22080617	22080625	22081112	22081193	16312	31,57	57,71	151112	103,86	165	99	0.000751174	0.0641878	0.246,0.325	0.468,0.439	-0.168
ENSG00000160194	NDUFV3	chr21	+	42903181	42904276	42896926	42897047	42908863	42909105	6431	13991666	228270	34363457	254311	1194	99	6.00121e-08	5.56758e-05	0.337,0.338	0.529,0.48	-0.167
ENSG00000168488	ATXN2L	chr16	+	28836325	28836490	28835932	28836122	28836727	28837237	83107	94137	34,58	446384	80,83	264	99	0.000284301	0.0332668	0.509,0.47	0.676,0.634	-0.166
ENSG00000064490	RFXANK	chr19	+	19197185	19197251	19196962	19197046	19197520	19197621	1895	209276	112110	589589	132129	165	99	5.51664e-06	0.0017824	0.528,0.601	0.728,0.733	-0.166
ENSG00000160216	AGPAT3	chr21	+	43960631	43960779	43959782	43959859	43967945	43968115	87870	21,39	91,90	157143	162148	247	99	6.86017e-08	6.27484e-05	0.085,0.148	0.28,0.279	-0.163
ENSG00000165795	NDRG2	chr14	-	21022863	21022905	21022391	21022497	21023240	21023321	81520	43,56	82109	189166	204133	141	99	0.000139483	0.0201888	0.269,0.265	0.394,0.467	-0.163
ENSG00000089682	RBM41	chrX	-	107113396	107113468	107088734	107088839	107115351	107115556	62814	98119	25,29	293322	14,47	171	99	0.000437984	0.0450057	0.694,0.704	0.924,0.799	-0.163
ENSG00000163812	ZDHHC3	chr3	-	44932906	44932990	44929305	44929436	44933117	44933199	16541	58,70	134125	228209	191204	183	99	2.0163e-06	0.000836922	0.19,0.233	0.392,0.357	-0.163
ENSG00000163660	CCNL1	chr3	-	157151916	157151930	157150281	157150381	157152176	157152241	41023	0,1	35,43	23,10	66,73	113	99	1.13221e-06	0.000532813	0.0,0.02	0.234,0.107	-0.161
ENSG00000149547	EI24	chr11	+	125570103	125570190	125569279	125569573	125572457	125572569	21035	46,80	73,95	199248	152148	186	99	0.000129191	0.0190681	0.251,0.309	0.411,0.471	-0.161
ENSG00000132600	PRMT7	chr16	+	68347630	68347678	68346120	68346280	68348341	68348431	82718	51,58	12,8	159151	9,3	147	99	0.000220735	0.0282741	0.741,0.83	0.922,0.971	-0.161
ENSG00000133226	SRRM1	chr1	+	24648023	24648166	24646666	24646789	24648858	24648887	85942	32,49	156159	135115	153144	242	99	2.03872e-10	7.19029e-07	0.077,0.112	0.265,0.246	-0.161
ENSG00000239665	AL157392.3	chr10	+	13652407	13652489	13648084	13648230	13654352	13654401	71371	0,0	10,9	3,6	14,12	181	99	0.000259844	0.0312496	0.0,0.0	0.105,0.215	-0.16
ENSG00000124222	STX16	chr20	+	58659622	58659634	58651271	58652087	58667489	58667597	49420	10,12	60,61	59,31	98,84	111	99	0.000754181	0.0642594	0.129,0.149	0.349,0.248	-0.159
ENSG00000177479	ARIH2	chr3	+	48949065	48949096	48945135	48945181	48961611	48961638	62127	0,0	13,9	5,7	26,23	130	99	0.000149209	0.021111	0.0,0.0	0.128,0.188	-0.158
ENSG00000061987	MON2	chr12	+	62470700	62470778	62466847	62467318	62484169	62484233	62826	3,1	22,16	20,8	29,27	177	99	0.00147283	0.0987676	0.071,0.034	0.278,0.142	-0.158
ENSG00000141380	SS18	chr18	-	26035830	26035923	26035004	26035127	26038554	26038659	5194	58,96	93112	285270	183194	192	99	5.91251e-05	0.0108842	0.243,0.307	0.445,0.418	-0.156
ENSG00000166262	FAM227B	chr15	-	49620133	49620190	49615120	49615243	49620699	49620818	33225	1,0	12,17	7,8	19,25	156	99	0.000143497	0.0204813	0.05,0.0	0.189,0.169	-0.154
ENSG00000133742	CA1	chr8	-	85351730	85351784	85342748	85342825	85378045	85378108	51283	0,0	8,4	8,5	30,17	153	99	0.000353012	0.0389886	0.0,0.0	0.147,0.16	-0.153
ENSG00000138674	SEC31A	chr4	-	82861630	82861708	82857688	82857764	82862533	82862572	54606	127140	20,22	321321	8,19	177	99	6.21166e-06	0.00193013	0.78,0.781	0.957,0.904	-0.15
ENSG00000119782	FKBP1B	chr2	+	24054103	24054192	24053901	24053949	24060813	24060926	41012	1,0	9,15	20,8	33,34	188	99	7.62819e-05	0.0131056	0.055,0.0	0.242,0.11	-0.148
ENSG00000178927	CYBC1	chr17	-	82446622	82446696	82445250	82445960	82449169	82449292	46379	38,77	8,3	98,80	1,1	173	99	0.000558437	0.0528201	0.731,0.936	0.982,0.979	-0.147
ENSG00000173905	GOLIM4	chr3	-	168040785	168040869	168036835	168036994	168041391	168041474	6456	38,43	59,68	141138	116109	183	99	0.00111882	0.0829472	0.258,0.255	0.397,0.406	-0.145
ENSG00000172901	LVRN	chr5	+	116021711	116021752	116015627	116015765	116022390	116022466	40801	0,0	5,12	5,3	17,16	140	99	0.00142544	0.0971059	0.0,0.0	0.172,0.117	-0.144
ENSG00000123737	EXOSC9	chr4	+	121816143	121816194	121813865	121814047	121816368	121816447	73047	117,83	148153	194210	150182	150	99	0.000421214	0.0442135	0.343,0.264	0.461,0.432	-0.143
ENSG00000171456	ASXL1	chr20	+	32371777	32371874	32369014	32369123	32428127	32428248	53676	6,5	43,53	51,33	95,75	196	99	6.20227e-06	0.00193013	0.066,0.045	0.213,0.182	-0.142
ENSG00000117523	PRRC2C	chr1	+	171589368	171589605	171588378	171588505	171591586	171593506	67782	55,52	83,82	139127	78110	336	99	0.000195825	0.0258481	0.163,0.157	0.344,0.254	-0.139
ENSG00000175193	PARL	chr3	-	183856431	183856551	183844230	183844326	183862696	183862801	34809	1,0	12,13	9,15	37,25	219	99	0.000127408	0.0189378	0.036,0.0	0.099,0.213	-0.138
ENSG00000164751	PEX2	chr8	-	76988306	76988338	76986186	76986296	76999989	77000078	57125	127150	49,49	299299	43,58	131	99	0.000266647	0.031832	0.662,0.698	0.84,0.796	-0.138
ENSG00000124587	PEX6	chr6	-	42974002	42974086	42969884	42969987	42974874	42975038	15504	97111	13,14	283186	9,6	183	99	0.000122334	0.0183903	0.801,0.811	0.944,0.944	-0.138
ENSG00000167182	SP2	chr17	+	47909663	47909730	47897814	47897927	47915311	47915388	52465	0,0	3,7	6,3	21,12	166	99	0.00119298	0.0867579	0.0,0.0	0.146,0.13	-0.138
ENSG00000100181	TPTEP1	chr22	+	16647167	16647257	16638578	16638740	16647662	16647785	68301	16,15	54,60	66,73	86121	189	99	0.000288618	0.0336507	0.134,0.116	0.287,0.24	-0.138
ENSG00000175224	ATG13	chr11	+	46621059	46621157	46618324	46618375	46644278	46644360	62275	0,0	9,10	3,6	10,18	197	99	0.000913225	0.0727689	0.0,0.0	0.131,0.143	-0.137
ENSG00000073921	PICALM	chr11	-	85990249	85990399	85983865	85983973	85996825	85996929	55631	641763	421476	20991865	783671	249	99	4.63995e-06	0.00158594	0.377,0.389	0.516,0.525	-0.137
ENSG00000256525	POLG2	chr17	-	64483389	64483506	64482918	64482999	64485727	64485868	6722	11,14	67,67	104,52	130123	216	99	2.05252e-05	0.00495519	0.07,0.087	0.268,0.162	-0.137
ENSG00000119640	ACYP1	chr14	-	75061683	75061762	75053242	75053659	75063469	75063561	3562	5,23	77131	70,62	159139	178	99	9.35578e-07	0.000470994	0.035,0.089	0.197,0.199	-0.136
ENSG00000103174	NAGPA	chr16	-	5028296	5028365	5027979	5028185	5028879	5029008	623	0,1	10,8	7,7	24,17	168	99	0.000817715	0.0675624	0.0,0.069	0.147,0.195	-0.136
ENSG00000224689	ZNF812P	chr19	-	9700000	9700086	9696093	9696248	9700387	9700672	3058	0,0	8,3	8,1	14,14	185	99	0.000927249	0.0737055	0.0,0.0	0.234,0.037	-0.136
ENSG00000159023	EPB41	chr1	+	29058588	29058645	29053103	29053312	29060421	29060484	68210	50,52	143133	120164	169202	156	99	6.39781e-05	0.0114459	0.182,0.199	0.311,0.34	-0.135
ENSG00000048991	R3HDM1	chr2	+	135616667	135616757	135604855	135605016	135621493	135621608	40605	30,43	93115	92,98	125119	189	99	8.72729e-05	0.0144083	0.145,0.164	0.278,0.301	-0.135
ENSG00000115084	SLC35F5	chr2	-	113733364	113733403	113731583	113731648	113734585	113734673	53123	0,0	16,17	11,1	25,24	138	99	8.82487e-05	0.0144083	0.0,0.0	0.24,0.029	-0.135
ENSG00000129292	PHF20L1	chr8	+	132825034	132825157	132824003	132824060	132825263	132825337	73471	1,5	32,49	25,30	57,69	222	99	4.13631e-06	0.001452	0.014,0.044	0.164,0.162	-0.134
ENSG00000121390	PSPC1	chr13	-	19699379	19699398	19677723	19677823	19730238	19730316	52865	0,1	12,19	5,9	41,28	118	99	0.000994278	0.0769044	0.0,0.042	0.093,0.212	-0.132
ENSG00000165661	QSOX2	chr9	-	136223762	136223853	136219029	136219164	136224006	136224112	18084	61,89	6,9	154157	4,1	190	99	0.000365802	0.0398997	0.841,0.837	0.953,0.988	-0.131
ENSG00000146373	RNF217	chr6	+	125082448	125082563	125081435	125081507	125082863	125083515	80936	0,2	13,16	17,19	53,38	214	99	0.000342533	0.0381149	0.0,0.055	0.129,0.188	-0.131
ENSG00000204147	ASAH2B	chr10	+	50743672	50743741	50742914	50743010	50749342	50749402	62036	0,0	6,19	4,7	17,26	168	99	0.000324125	0.036544	0.0,0.0	0.122,0.137	-0.13
ENSG00000145439	CBR4	chr4	-	169005884	169005914	169001574	169002205	169006754	169006891	29799	4,5	89,97	40,40	147165	129	99	3.07715e-07	0.000206334	0.033,0.038	0.173,0.157	-0.129
ENSG00000140105	WARS1	chr14	-	100375282	100375406	100369086	100369258	100376259	100376285	69648	197247	166197	956824	465392	223	99	0.000141319	0.0203043	0.345,0.358	0.477,0.483	-0.129
ENSG00000196428	TSC22D2	chr3	+	150423048	150423120	150408334	150411308	150457075	150457127	73507	12,4	53,52	40,26	75,69	171	99	0.000437158	0.044992	0.116,0.043	0.236,0.179	-0.128
ENSG00000156958	GALK2	chr15	+	49195084	49195214	49155793	49156016	49201161	49201250	54809	1,0	10,13	7,4	13,15	229	99	0.000781021	0.0658715	0.041,0.0	0.189,0.103	-0.126
ENSG00000140025	EFCAB11	chr14	-	89924512	89924677	89797126	89797324	89931540	89931631	2617	3,4	20,35	20,17	37,30	264	99	0.000370678	0.0403119	0.053,0.041	0.169,0.175	-0.125
ENSG00000165304	MELK	chr9	+	36657240	36657363	36651745	36651877	36665349	36665581	38983	184228	28,26	392398	19,22	222	99	0.000309376	0.0352947	0.746,0.796	0.902,0.89	-0.125
ENSG00000109685	NSD2	chr4	+	1899220	1899395	1893729	1893909	1900625	1901251	19014	0,1	5,7	7,6	13,14	274	99	0.00141745	0.0968969	0.0,0.049	0.163,0.134	-0.124
ENSG00000095787	WAC	chr10	+	28595732	28596041	28590719	28590832	28608185	28608431	50683	783989	81,89	24522376	111114	408	99	5.58627e-06	0.00179117	0.701,0.729	0.843,0.835	-0.124
ENSG00000124831	LRRFIP1	chr2	+	237727875	237727935	237708543	237708630	237748363	237748399	32841	0,0	16,21	6,8	46,24	159	99	0.000209378	0.0271948	0.0,0.0	0.075,0.172	-0.123
ENSG00000087053	MTMR2	chr11	-	95866402	95866486	95865600	95865676	95882373	95882496	88552	0,0	9,15	4,9	24,25	183	99	0.000226992	0.0286796	0.0,0.0	0.083,0.163	-0.123
ENSG00000196924	FLNA	chrX	-	154357250	154357274	154354824	154355072	154357433	154357623	18339	347409	91139	897989	139127	123	99	8.91795e-07	0.000456023	0.754,0.703	0.839,0.862	-0.122
ENSG00000150593	PDCD4	chr10	+	110876669	110876753	110875965	110876070	110881232	110881535	52793	9,9	38,52	53,46	104,84	183	99	0.000888729	0.071421	0.114,0.086	0.216,0.229	-0.122
ENSG00000183963	SMTN	chr22	+	31082909	31083002	31080675	31080754	31083178	31083309	77760	0,0	26,33	13,12	50,43	192	99	2.07507e-06	0.000852907	0.0,0.0	0.118,0.126	-0.122
ENSG00000117308	GALE	chr1	-	23796508	23796586	23796150	23796265	23796696	23796782	55098	248337	29,31	405461	11,7	177	99	2.84326e-08	3.12961e-05	0.827,0.859	0.954,0.974	-0.121
ENSG00000166908	PIP4K2C	chr12	+	57599399	57599438	57599064	57599211	57600323	57600436	75507	64,66	9,9	108130	6,1	138	99	0.00078384	0.065938	0.836,0.84	0.928,0.989	-0.121
ENSG00000123243	ITIH5	chr10	-	7609419	7609494	7585900	7586069	7615981	7616098	71612	0,0	11,17	12,9	48,39	174	99	8.81411e-05	0.0144083	0.0,0.0	0.125,0.116	-0.12
ENSG00000072736	NFATC3	chr16	+	68221195	68221284	68190767	68191775	68226349	68229258	1588	30,33	112105	107,93	175137	188	99	0.000112223	0.0172701	0.124,0.142	0.244,0.263	-0.12
ENSG00000003436	TFPI	chr2	-	187520541	187520613	187503647	187503770	187529363	187529485	23259	0,1	11,19	7,6	32,19	171	99	0.000779646	0.0658411	0.0,0.03	0.112,0.155	-0.119
ENSG00000198836	OPA1	chr3	+	193617783	193617837	193617177	193617285	193618868	193618936	53048	61,58	125155	135122	147185	153	99	0.00138948	0.0957175	0.24,0.195	0.373,0.299	-0.118
ENSG00000054690	PLEKHH1	chr14	+	67586809	67586949	67585950	67586097	67587073	67587548	51742	0,0	14,11	4,6	20,13	239	99	0.00111887	0.0829472	0.0,0.0	0.077,0.16	-0.118
ENSG00000180822	PSMG4	chr6	+	3264208	3264325	3263683	3263759	3267590	3267781	3660	85100	136150	200165	156158	216	99	0.000580276	0.0543928	0.223,0.234	0.37,0.324	-0.118
ENSG00000182150	ERCC6L2	chr9	+	95967318	95967625	95966561	95966714	95970575	95970656	80095	3,6	16,26	36,22	35,36	406	99	0.000487317	0.0480963	0.044,0.053	0.201,0.13	-0.117
ENSG00000157181	ODR4	chr1	+	186411810	186411893	186406082	186406268	186417543	186417654	55169	18,29	100105	71,68	126134	182	99	0.000171397	0.0234799	0.089,0.131	0.235,0.216	-0.115
ENSG00000161203	AP2M1	chr3	+	184180644	184180650	184180063	184180251	184180848	184180881	59310	668745	378449	14531182	480429	105	99	3.59322e-05	0.00755182	0.625,0.61	0.741,0.722	-0.114
ENSG00000168137	SETD5	chr3	+	9434589	9434630	9434333	9434485	9434823	9434882	14781	25,23	77117	117,87	191200	140	99	0.00067454	0.0598442	0.187,0.122	0.302,0.235	-0.114
ENSG00000204463	BAG6	chr6	-	31639499	31639646	31639027	31639226	31640198	31640306	932	326471	136205	1094912	284255	246	99	0.00109398	0.0817555	0.491,0.48	0.608,0.59	-0.113
ENSG00000029363	BCLAF1	chr6	-	136267028	136267175	136261264	136261477	136268161	136268273	6514	671732	137106	16191876	129202	246	99	7.57453e-05	0.0130479	0.663,0.735	0.835,0.789	-0.113
ENSG00000174227	PIGG	chr4	+	501100	501170	500395	500601	505717	505927	29300	4,3	39,35	27,17	66,63	169	99	0.000952798	0.075088	0.057,0.048	0.193,0.136	-0.112
ENSG00000090621	PABPC4	chr1	-	39563835	39563922	39563613	39563741	39564422	39564491	57887	299429	79,87	878791	107106	186	99	0.00045176	0.0456981	0.668,0.724	0.814,0.799	-0.111
ENSG00000082701	GSK3B	chr3	-	119866589	119866628	119863418	119863605	119876412	119876508	11510	3,6	51,40	41,33	124122	138	99	0.00112283	0.0831459	0.04,0.097	0.192,0.163	-0.109
ENSG00000103253	HAGHL	chr16	+	729008	729088	728793	728895	729287	729715	20986	58,75	4,6	97,89	0,1	179	99	0.000577662	0.0542902	0.889,0.874	1.0,0.98	-0.109
ENSG00000137221	TJAP1	chr6	+	43478658	43478718	43478086	43478232	43497880	43497977	61125	3,9	50,70	35,33	111107	159	99	0.000425607	0.0444075	0.036,0.074	0.164,0.161	-0.108
ENSG00000111011	RSRC2	chr12	-	122520503	122520581	122518838	122519029	122521384	122521428	67689	28,36	131132	68,80	152133	177	99	0.000354364	0.0390714	0.107,0.132	0.2,0.252	-0.107
ENSG00000116750	UCHL5	chr1	-	193020306	193020381	193015758	193016395	193021096	193021195	46829	203164	398479	503500	626702	174	99	1.50471e-05	0.00396105	0.225,0.163	0.314,0.288	-0.107
ENSG00000106290	TAF6	chr7	-	100116513	100116612	100114181	100114268	100118517	100118649	31669	0,0	5,10	4,7	23,23	198	99	0.00132695	0.092462	0.0,0.0	0.08,0.132	-0.106
ENSG00000245958	AC093752.1	chr4	+	119457970	119458077	119454895	119455133	119460182	119460242	10311	0,0	7,7	8,2	25,12	206	99	0.00140787	0.096445	0.0,0.0	0.133,0.074	-0.104
ENSG00000100813	ACIN1	chr14	-	23089981	23090101	23081747	23081836	23090521	23090633	12657	97103	160147	268206	221208	219	99	0.00142929	0.0971947	0.215,0.241	0.354,0.309	-0.104
ENSG00000154269	ENPP3	chr6	+	131638450	131638576	131637234	131637462	131641454	131641530	44436	1,2	15,27	18,14	47,45	225	99	0.000796766	0.0667191	0.028,0.032	0.144,0.12	-0.102
ENSG00000186866	POFUT2	chr21	-	45285268	45285328	45283351	45283527	45285677	45285928	425	0,2	33,46	18,20	111,81	159	99	3.20577e-05	0.00691622	0.0,0.026	0.092,0.133	-0.1
ENSG00000204104	TRAF3IP1	chr2	+	238338361	238338457	238333959	238334035	238347454	238347475	20628	0,0	10,11	5,7	23,32	195	99	0.00105933	0.0801199	0.0,0.0	0.099,0.1	-0.1
ENSG00000251022	THAP9-AS1	chr4	-	82899712	82899737	82897792	82898062	82900076	82900223	1927	12,5	87,96	62,39	201196	124	99	0.000382294	0.0412407	0.099,0.04	0.198,0.137	-0.098
ENSG00000138326	RPS24	chr10	+	78040203	78040225	78037193	78037304	78040614	78040696	60145	568843	41544724	31152227	83887895	121	99	6.07259e-10	1.71038e-06	0.101,0.127	0.233,0.188	-0.097
ENSG00000119777	TMEM214	chr2	+	27037814	27037892	27037560	27037702	27038145	27038237	76727	13,20	83,99	99,72	217193	177	99	0.00044177	0.0452515	0.081,0.102	0.203,0.173	-0.097
ENSG00000197111	PCBP2	chr12	+	53467804	53467843	53467220	53467293	53468776	53468832	34631	16042010	268374	44523547	403265	138	99	5.44663e-09	9.06961e-06	0.811,0.794	0.888,0.906	-0.095
ENSG00000243147	MRPL33	chr2	+	27774423	27774530	27771718	27771799	27779432	27779697	58065	266268	28,18	488446	15,12	206	99	0.000191304	0.0254063	0.82,0.877	0.94,0.947	-0.095
ENSG00000133247	KMT5C	chr19	+	55343977	55343997	55343679	55343843	55346212	55346349	43433	50,80	5,7	175125	1,1	119	99	0.000265773	0.031786	0.893,0.905	0.993,0.99	-0.093
ENSG00000237298	TTN-AS1	chr2	+	178537360	178537447	178535731	178535828	178537603	178537691	27860	0,1	20,19	7,7	26,38	186	99	0.00101687	0.0781511	0.0,0.027	0.125,0.089	-0.093
ENSG00000111237	VPS29	chr12	-	110498819	110498859	110496011	110496203	110499534	110499546	83463	25,27	197195	94,97	297331	139	99	6.26151e-05	0.011233	0.083,0.09	0.184,0.173	-0.092
ENSG00000168137	SETD5	chr3	+	9452887	9452951	9448387	9448630	9453738	9453868	14788	3,12	122150	47,66	287224	163	99	9.97246e-07	0.00049063	0.015,0.046	0.09,0.152	-0.09
ENSG00000151292	CSNK1G3	chr5	+	123595038	123595134	123591318	123591414	123604723	123604830	58454	0,2	29,38	20,10	79,50	195	99	7.09511e-05	0.0123863	0.0,0.026	0.114,0.092	-0.09
ENSG00000101266	CSNK2A1	chr20	-	527932	528049	508450	508660	543671	543712	62076	117,94	195230	310333	402366	216	99	0.000790956	0.0663647	0.216,0.158	0.261,0.294	-0.09
ENSG00000135336	ORC3	chr6	+	87594526	87594613	87594352	87594407	87601783	87601881	89095	39,36	277313	132169	462436	186	99	1.55287e-07	0.000121502	0.07,0.058	0.132,0.171	-0.088
ENSG00000144840	RABL3	chr3	-	120738526	120738667	120730695	120730787	120742461	120742533	536	1,0	50,32	17,17	68,69	240	99	3.0639e-06	0.0011636	0.008,0.0	0.093,0.092	-0.088
ENSG00000196305	IARS1	chr9	-	92240642	92240691	92229000	92229126	92240855	92240961	78618	13,22	366462	117125	678582	148	99	7.7427e-13	8.38044e-09	0.023,0.031	0.103,0.126	-0.087
ENSG00000143612	C1orf43	chr1	-	154219835	154219937	154214456	154214574	154220341	154220533	21583	502633	66,65	13291270	83,69	201	99	0.000188629	0.0251024	0.789,0.827	0.887,0.901	-0.086
ENSG00000157212	PAXIP1	chr7	-	154986016	154986179	154983218	154983332	154991005	154991069	14118	14,23	104,89	71,73	150149	262	99	0.000123853	0.0185756	0.048,0.089	0.152,0.156	-0.085
ENSG00000156976	EIF4A2	chr3	+	186788309	186788420	186787802	186787882	186789124	186789291	90542	469513	700803	11651155	13191019	210	99	0.000808036	0.0671901	0.24,0.231	0.294,0.348	-0.085
ENSG00000182628	SKA2	chr17	-	59131280	59131367	59111955	59112345	59155130	59155174	386	332294	39,37	666693	43,38	186	99	0.00148596	0.0993832	0.819,0.809	0.892,0.907	-0.085
ENSG00000089597	GANAB	chr11	-	62634309	62634375	62633441	62633514	62634820	62635000	19853	213211	511595	674619	1106978	165	99	0.000392625	0.0420063	0.2,0.175	0.268,0.275	-0.084
ENSG00000106682	EIF4H	chr7	+	74190246	74190306	74189821	74189918	74194740	74194805	41107	325372	768922	978955	14561525	159	99	0.00043558	0.044938	0.209,0.201	0.295,0.281	-0.083
ENSG00000163636	PSMD6	chr3	-	64022642	64022801	64022317	64022523	64023274	64023472	6810	47,63	120161	198177	266261	258	99	0.000987564	0.0766241	0.131,0.131	0.222,0.206	-0.083
ENSG00000251381	LINC00958	chr11	-	12980409	12980909	12961540	12962763	12989455	12989546	55909	900874	23,34	20652003	24,34	599	99	0.00105338	0.0801199	0.866,0.809	0.934,0.907	-0.083
ENSG00000125952	MAX	chr14	-	65077343	65077428	65075126	65076663	65077912	65078036	215	20,28	184186	93,97	278329	184	99	3.91599e-05	0.00816074	0.055,0.075	0.153,0.137	-0.08
ENSG00000116747	RO60	chr1	+	193070553	193070619	193069231	193069634	193075819	193075931	69109	3,0	35,44	21,12	97,69	165	99	0.00041523	0.04399	0.049,0.0	0.115,0.094	-0.08
ENSG00000135317	SNX14	chr6	-	85538837	85538864	85536791	85536924	85541984	85542043	67337	13,21	172188	83,79	358377	126	99	0.000252425	0.0306485	0.056,0.081	0.154,0.141	-0.079
ENSG00000058799	YIPF1	chr1	-	53882942	53883031	53878641	53878722	53883112	53883276	30550	5,1	67,56	21,19	79112	188	99	0.000352076	0.0389515	0.038,0.009	0.123,0.082	-0.079
ENSG00000166295	ANAPC16	chr10	+	72223887	72224056	72215999	72216072	72230365	72230440	64138	562712	43,52	15671346	54,54	268	99	0.000702149	0.0617054	0.828,0.835	0.915,0.902	-0.077
ENSG00000102393	GLA	chrX	-	101399743	101399800	101398784	101398946	101400665	101400757	49559	2,5	144130	35,29	222181	156	99	5.80201e-07	0.000330521	0.009,0.024	0.091,0.092	-0.075
ENSG00000040275	SPDL1	chr5	+	169590752	169590829	169588534	169588575	169591047	169591224	2859	2,4	69,53	15,25	106,92	176	99	0.000580429	0.0543928	0.016,0.041	0.074,0.133	-0.075
ENSG00000131051	RBM39	chr20	-	35740524	35740597	35738967	35739017	35740823	35740887	39019	115111	392406	284329	645643	172	99	0.00070217	0.0617054	0.144,0.136	0.202,0.228	-0.075
ENSG00000120860	WASHC3	chr12	-	102017719	102017805	102012941	102013192	102025973	102026038	28217	0,2	51,65	11,18	96,82	185	99	5.15579e-05	0.00990614	0.0,0.016	0.058,0.105	-0.074
ENSG00000136243	NUP42	chr7	+	23197172	23197247	23196679	23196766	23199457	23199542	81464	1,3	47,59	15,18	98,87	174	99	0.000618829	0.0569677	0.012,0.028	0.08,0.105	-0.072
ENSG00000114982	KANSL3	chr2	-	96615491	96615544	96613487	96613619	96619358	96619544	55203	2,2	44,68	18,12	91,93	152	99	0.000942889	0.0746745	0.029,0.019	0.114,0.078	-0.072
ENSG00000113648	MACROH2A1	chr5	-	135350822	135350913	135345967	135346057	135352945	135362901	57605	109128	647747	399299	10231001	190	99	2.56346e-06	0.0010151	0.081,0.082	0.169,0.135	-0.071
ENSG00000152795	HNRNPDL	chr4	-	82425562	82425667	82424628	82424883	82426036	82426129	32726	94110	521532	386274	784975	204	99	4.54843e-05	0.00900562	0.081,0.091	0.193,0.12	-0.071
ENSG00000115234	SNX17	chr2	+	27373039	27373113	27372622	27372740	27373246	27373311	41158	5,4	97,98	42,22	168176	173	99	8.35818e-05	0.0139536	0.029,0.023	0.125,0.067	-0.07
ENSG00000116754	SRSF11	chr1	+	70231858	70231975	70228421	70228555	70232267	70232375	24284	51,78	201369	221199	485480	216	99	0.000166761	0.0230343	0.104,0.088	0.173,0.16	-0.07
ENSG00000143889	HNRNPLL	chr2	-	38577919	38578002	38577460	38577532	38581912	38581985	55217	16,13	182146	67,64	282266	182	99	7.66138e-05	0.0131099	0.046,0.046	0.114,0.116	-0.069
ENSG00000134884	ARGLU1	chr13	-	106557558	106557616	106557047	106557131	106559431	106559657	44810	8,5	118129	35,37	221199	157	99	0.000262145	0.0314626	0.041,0.024	0.091,0.105	-0.066
ENSG00000114745	GORASP1	chr3	-	39101509	39101570	39101015	39101102	39102677	39102881	80308	1,0	53,49	8,10	65,77	160	99	0.000547571	0.0521413	0.012,0.0	0.071,0.074	-0.066
ENSG00000145996	CDKAL1	chr6	+	20535086	20535199	20534480	20534574	20535350	20535394	21133	3,3	58,50	23,17	92,95	212	99	0.00123542	0.0881093	0.024,0.027	0.105,0.077	-0.066
ENSG00000140262	TCF12	chr15	+	57252420	57252492	57251168	57251423	57253261	57253468	18207	0,4	58,65	16,13	112,78	171	99	0.00101157	0.0779281	0.0,0.034	0.076,0.088	-0.065
ENSG00000139218	SCAF11	chr12	-	45974189	45975734	45964106	45964188	45990352	45990565	87531	68,70	79102	305285	152142	1644	99	4.91608e-07	0.000300242	0.049,0.04	0.108,0.108	-0.064
ENSG00000143776	CDC42BPA	chr1	-	227068653	227068701	227047926	227048010	227069776	227069853	5490	1,1	90105	24,18	203172	147	99	1.1436e-05	0.00316034	0.007,0.006	0.074,0.066	-0.064
ENSG00000249196	TMEM132D-AS1	chr12	+	129111419	129111669	129110992	129111139	129113100	129113294	24006	271374	5,10	957681	4,1	349	99	0.000590136	0.0552228	0.939,0.914	0.985,0.995	-0.064
ENSG00000111275	ALDH2	chr12	+	111775604	111775720	111766947	111767096	111781917	111782022	755	2,0	23,31	19,8	72,59	215	99	0.00086665	0.0699155	0.038,0.0	0.108,0.059	-0.064
ENSG00000197746	PSAP	chr10	-	71823887	71823896	71821875	71822007	71825836	71825893	87428	74,98	8701150	382291	22151748	108	99	1.013e-05	0.00283561	0.072,0.072	0.137,0.132	-0.063
ENSG00000092108	SCFD1	chr14	+	30707816	30707876	30705823	30705885	30707989	30708065	43270	4,1	114104	22,24	181167	159	99	3.24133e-05	0.00694714	0.021,0.006	0.07,0.082	-0.063
ENSG00000105879	CBLL1	chr7	+	107752544	107752617	107748879	107749047	107753410	107753511	81985	15,11	131171	55,74	306289	172	99	0.00042106	0.0442135	0.062,0.036	0.094,0.128	-0.062
ENSG00000161010	MRNIP	chr5	-	179853196	179853276	179847977	179848066	179853377	179853437	21066	1,1	35,53	15,10	87,83	179	99	0.00065115	0.0586505	0.016,0.01	0.087,0.062	-0.061
ENSG00000134900	TPP2	chr13	+	102667757	102667883	102664794	102664925	102674282	102674411	77944	16,13	134131	62,70	287220	225	99	0.000826253	0.0677507	0.05,0.042	0.087,0.123	-0.059
ENSG00000144580	CNOT9	chr2	+	218573994	218574233	218568814	218568978	218580560	218580724	90979	4,3	43,54	20,25	92,65	338	99	0.000832414	0.0679128	0.027,0.016	0.06,0.101	-0.059
ENSG00000106462	EZH2	chr7	-	148818977	148819059	148816683	148818117	148819595	148819687	53156	35,53	448415	169166	732736	181	99	1.47758e-05	0.00393266	0.041,0.065	0.112,0.11	-0.058
ENSG00000196235	SUPT5H	chr19	+	39458293	39458305	39457674	39457740	39458817	39458887	66279	187202	13,17	479457	10,8	111	99	0.00039091	0.0419611	0.928,0.914	0.977,0.981	-0.058
ENSG00000100564	PIGH	chr14	-	67592314	67592436	67589713	67590172	67592634	67592718	84660	2,10	84114	36,30	172154	221	99	0.00042646	0.0444075	0.011,0.038	0.086,0.08	-0.058
ENSG00000163507	CIP2A	chr3	-	108585665	108585749	108585064	108585212	108589273	108589456	71632	3,3	101124	26,32	226206	183	99	5.78398e-05	0.0107511	0.016,0.013	0.059,0.078	-0.054
ENSG00000198860	TSEN15	chr1	+	184070615	184070732	184054727	184054863	184072156	184072298	81750	4,11	105121	46,50	245241	216	99	0.000459923	0.0461643	0.017,0.04	0.079,0.087	-0.054
ENSG00000172590	MRPL52	chr14	+	22830963	22831037	22830186	22830254	22833417	22833468	47132	29,55	361365	121126	536569	173	99	0.000865732	0.0699155	0.044,0.079	0.114,0.112	-0.052
ENSG00000147140	NONO	chrX	+	71284396	71284453	71283589	71283721	71290628	71290791	74589	9361117	83110	24311918	111115	156	99	0.00105342	0.0801199	0.877,0.866	0.933,0.914	-0.052
ENSG00000110514	MADD	chr11	+	47292542	47292596	47290609	47290816	47293882	47293983	38758	3,1	53,90	20,12	134123	153	99	0.00137195	0.0949111	0.035,0.007	0.088,0.059	-0.052
ENSG00000171204	TMEM126B	chr11	+	85631686	85631808	85628592	85628688	85634085	85634176	740	464525	11,3	10851011	61,28	221	99	0.000425601	0.0444075	0.95,0.987	0.888,0.942	0.053
ENSG00000078403	MLLT10	chr10	+	21733503	21733592	21732898	21733087	21733767	21734129	82220	152160	0,1	318299	12,9	188	99	0.00113698	0.0838111	1.0,0.988	0.933,0.946	0.054
ENSG00000165097	KDM1B	chr6	+	18162834	18162924	18161326	18161454	18166266	18166378	46273	147157	2,0	341355	9,17	189	99	0.00130173	0.0914141	0.975,1.0	0.952,0.916	0.054
ENSG00000137776	SLTM	chr15	-	58913498	58913696	58912562	58912610	58916934	58916999	60091	592700	3,11	979929	30,30	297	99	0.00111317	0.0827137	0.985,0.955	0.916,0.912	0.056
ENSG00000169692	AGPAT2	chr9	-	136676584	136676680	136674734	136674807	136676960	136677136	75105	181205	0,4	449393	24,12	195	99	0.00147371	0.0987676	1.0,0.963	0.905,0.943	0.058
ENSG00000060971	ACAA1	chr3	-	38133951	38134009	38131925	38132005	38136591	38136624	84271	134144	0,2	199245	12,9	157	99	0.000953766	0.075088	1.0,0.978	0.913,0.945	0.06
ENSG00000132768	DPH2	chr1	+	43971386	43972070	43970965	43971189	43972157	43972334	63294	9411196	0,3	19231943	16,21	783	99	6.48246e-05	0.0115338	1.0,0.981	0.938,0.921	0.061
ENSG00000001036	FUCA2	chr6	-	143503912	143504252	143501931	143502122	143507236	143507424	76606	798842	5,5	15541420	26,38	439	99	0.000215226	0.0277325	0.973,0.974	0.931,0.894	0.061
ENSG00000063046	EIF4B	chr12	+	53027781	53027919	53022492	53022627	53028014	53028188	48073	22402567	37,53	54685263	292273	237	99	6.32089e-10	1.71038e-06	0.962,0.953	0.887,0.89	0.069
ENSG00000143486	EIF2D	chr1	-	206599462	206599612	206599002	206599092	206600262	206600308	19394	452462	6,6	708703	26,37	249	99	0.000166815	0.0230343	0.968,0.968	0.915,0.883	0.069
ENSG00000137812	KNL1	chr15	+	40645655	40645772	40644996	40645087	40646986	40647038	44292	142158	0,2	246294	12,10	216	99	0.000673306	0.0598165	1.0,0.973	0.904,0.931	0.069
ENSG00000089248	ERP29	chr12	+	112019755	112019894	112013425	112013609	112022149	112023168	14833	12671424	41,54	27682773	210192	238	99	2.42255e-05	0.00557892	0.928,0.916	0.846,0.857	0.071
ENSG00000119048	UBE2B	chr5	+	134376668	134376694	134374382	134374463	134390224	134390321	73841	62,63	0,1	101105	4,11	125	99	0.0010197	0.0782762	1.0,0.98	0.952,0.883	0.073
ENSG00000129103	SUMF2	chr7	+	56074173	56074218	56072996	56073111	56074585	56074639	71198	200275	8,11	356313	35,33	144	99	0.00145025	0.0978007	0.945,0.945	0.875,0.867	0.074
ENSG00000138778	CENPE	chr4	-	103153046	103153250	103151218	103151377	103158299	103158458	44631	249256	2,1	456529	18,15	303	99	0.000178047	0.0240389	0.976,0.988	0.892,0.92	0.076
ENSG00000145604	SKP2	chr5	+	36163644	36163756	36152770	36153042	36166518	36166662	87709	263293	3,3	578558	28,32	211	99	2.10921e-05	0.00501746	0.976,0.979	0.906,0.891	0.079
ENSG00000113716	HMGXB3	chr5	+	150010110	150010608	150006472	150006647	150012254	150012353	62399	402491	1,3	755718	24,6	597	99	0.00106223	0.0801199	0.985,0.964	0.839,0.952	0.079
ENSG00000143442	POGZ	chr1	-	151408408	151408581	151408099	151408240	151408693	151408828	2370	108103	0,1	215203	10,6	272	99	0.000755969	0.0642594	1.0,0.974	0.887,0.925	0.081
ENSG00000127481	UBR4	chr1	-	19146022	19146106	19145792	19145933	19146825	19147000	48848	34,34	105155	34,16	329217	183	99	4.35941e-05	0.00876498	0.149,0.106	0.053,0.038	0.082
ENSG00000110660	SLC35F2	chr11	-	107804717	107804770	107803000	107803155	107806716	107806876	15925	76,80	0,0	135134	9,7	152	99	0.000222848	0.0284326	1.0,1.0	0.907,0.926	0.083
ENSG00000187742	SECISBP2	chr9	+	89325426	89325676	89319651	89319797	89325896	89326038	1001	147184	1,0	319309	11,8	349	99	0.000251784	0.0306485	0.977,1.0	0.892,0.916	0.084
ENSG00000183431	SF3A3	chr1	-	37978719	37978827	37969570	37969735	37979464	37979533	92591	102104	1,1	175182	13,7	207	99	0.000627234	0.0571866	0.98,0.98	0.866,0.926	0.084
ENSG00000055130	CUL1	chr7	+	148759303	148759354	148756967	148757150	148759547	148759638	56981	340329	21,21	472474	65,64	150	99	0.000510787	0.049658	0.914,0.912	0.827,0.83	0.085
ENSG00000245958	AC093752.1	chr4	+	119493332	119493437	119462895	119462979	119494432	119494523	10315	70,80	0,0	144117	8,4	204	99	0.00113014	0.0835114	1.0,1.0	0.897,0.934	0.085
ENSG00000166946	CCNDBP1	chr15	+	43185819	43186233	43185117	43185607	43189198	43189280	32813	117173	1,0	320248	10,4	513	99	0.00082516	0.0677507	0.958,1.0	0.861,0.923	0.087
ENSG00000115657	ABCB6	chr2	-	219215996	219216180	219214960	219215082	219216363	219216465	21739	101106	0,1	224180	9,7	283	99	0.000595578	0.0554922	1.0,0.974	0.897,0.9	0.088
ENSG00000198000	NOL8	chr9	-	92311145	92311259	92310552	92310675	92314266	92316138	51905	276348	6,8	635680	66,30	213	99	0.000134526	0.0196838	0.955,0.953	0.817,0.913	0.089
ENSG00000106635	BCL7B	chr7	-	73543547	73543644	73539715	73540052	73552166	73552242	79895	237308	6,10	608482	46,45	196	99	0.000214772	0.0277291	0.952,0.94	0.87,0.844	0.089
ENSG00000123405	NFE2	chr12	-	54300146	54300276	54295134	54295304	54300800	54301015	75232	102133	210260	97,94	491394	229	99	8.30438e-07	0.000431443	0.174,0.181	0.079,0.093	0.091
ENSG00000119912	IDE	chr10	-	92479276	92479421	92478644	92478789	92483254	92483337	3848	95,76	0,1	145138	7,7	244	99	0.000628397	0.0571866	1.0,0.969	0.894,0.889	0.093
ENSG00000111696	NT5DC3	chr12	-	103788837	103788919	103787440	103787527	103793163	103793265	7065	54,52	0,0	129117	7,7	181	99	0.000402009	0.0427287	1.0,1.0	0.91,0.901	0.095
ENSG00000171103	TRMT61B	chr2	-	28851071	28851298	28850327	28850405	28852407	28852499	21563	99,95	0,1	185179	8,6	326	99	0.000748165	0.0641209	1.0,0.966	0.875,0.901	0.095
ENSG00000153107	ANAPC1	chr2	-	111873612	111873664	111872799	111873408	111878809	111878971	44586	82,79	2,1	142110	13,10	151	99	0.000953891	0.075088	0.964,0.981	0.877,0.878	0.095
ENSG00000166946	CCNDBP1	chr15	+	43185819	43185879	43185327	43185607	43189198	43189280	32812	25,50	1,0	71,89	10,4	159	99	0.00113034	0.0835114	0.94,1.0	0.816,0.933	0.095
ENSG00000155313	USP25	chr21	+	15799756	15799843	15791501	15791664	15805120	15805258	66815	72,65	0,0	118,87	5,6	186	99	0.00124534	0.0884985	1.0,1.0	0.926,0.885	0.095
ENSG00000090061	CCNK	chr14	+	99491945	99492320	99481411	99481614	99492625	99492874	35366	12,25	31,29	5,9	91,73	474	99	5.56558e-07	0.000325622	0.075,0.153	0.011,0.025	0.096
ENSG00000171861	MRM3	chr17	+	783082	783327	782352	782692	787964	788132	8393	149149	0,1	262252	10,8	344	99	0.000165594	0.0229787	1.0,0.977	0.883,0.901	0.096
ENSG00000186866	POFUT2	chr21	-	45282803	45282938	45282348	45282459	45283382	45283527	419	11,17	34,45	8,13	121131	234	99	0.000167059	0.0230343	0.12,0.138	0.027,0.04	0.096
ENSG00000175866	BAIAP2	chr17	+	81036862	81036961	81035150	81035308	81053667	81053743	52109	16,24	66,59	13,9	134121	198	99	8.02164e-05	0.013531	0.108,0.169	0.046,0.036	0.098
ENSG00000082515	MRPL22	chr5	+	154950820	154950938	154941094	154941265	154956370	154956436	23885	802724	77100	15511428	298291	217	99	0.000297639	0.0343326	0.826,0.768	0.704,0.691	0.099
ENSG00000138614	INTS14	chr15	-	65607158	65607425	65605128	65605236	65611097	65611154	38253	310352	5,8	591606	36,29	366	99	0.000859843	0.0695392	0.944,0.922	0.816,0.85	0.1
ENSG00000123219	CENPK	chr5	-	65554796	65554898	65552492	65552549	65561462	65561564	70766	125139	1,2	206228	16,14	201	99	9.25083e-05	0.0149445	0.984,0.972	0.864,0.889	0.101
ENSG00000110025	SNX15	chr11	+	65038571	65038829	65035519	65035663	65039685	65040572	48947	105140	1,1	247214	8,11	357	99	0.00123702	0.0881093	0.967,0.975	0.895,0.844	0.102
ENSG00000112200	ZNF451	chr6	+	57090832	57090894	57090210	57090274	57099060	57099141	72365	45,46	1,0	102,67	8,6	161	99	0.00068045	0.0602862	0.965,1.0	0.887,0.873	0.102
ENSG00000167130	DOLPP1	chr9	+	129086138	129086267	129085517	129085616	129086708	129086798	53571	176195	2,6	307321	23,25	228	99	0.00035565	0.0391208	0.974,0.934	0.853,0.848	0.103
ENSG00000181789	COPG1	chr3	+	129250681	129250894	129249652	129249746	129252280	129252361	77403	61,69	0,1	184167	13,4	312	99	0.000817517	0.0675624	1.0,0.956	0.818,0.93	0.104
ENSG00000142856	ITGB3BP	chr1	-	63446805	63446856	63440772	63441103	63453917	63453974	30767	184255	10,15	318346	53,45	150	99	0.000172292	0.0235062	0.924,0.918	0.798,0.835	0.105
ENSG00000144524	COPS7B	chr2	+	231791732	231791808	231788554	231788732	231794262	231794351	28824	126147	6,5	242203	34,20	175	99	0.00083175	0.0679128	0.922,0.943	0.801,0.852	0.106
ENSG00000131051	RBM39	chr20	-	35729461	35729551	35729311	35729365	35731940	35732135	39010	376356	37,34	635657	123117	189	99	0.000419822	0.0442135	0.842,0.846	0.73,0.746	0.106
ENSG00000149182	ARFGAP2	chr11	-	47173425	47173482	47172025	47172333	47175850	47175923	55015	58,62	0,1	84,87	7,8	156	99	0.000195174	0.0258146	1.0,0.975	0.884,0.873	0.109
ENSG00000152942	RAD17	chr5	+	69372033	69372217	69370704	69371171	69373829	69373882	62607	174137	1,3	265330	17,19	283	99	0.000244389	0.0300204	0.984,0.941	0.845,0.859	0.11
ENSG00000140157	NIPA2	chr15	+	22845145	22845267	22838873	22839174	22851638	22851665	27756	79,90	2,1	162169	14,12	221	99	0.00126537	0.0894184	0.947,0.976	0.838,0.863	0.111
ENSG00000143363	PRUNE1	chr1	+	151017811	151017904	151008419	151008671	151024610	151024795	69893	40,55	0,1	96,88	5,9	192	99	0.000659233	0.0589681	1.0,0.966	0.908,0.834	0.112
ENSG00000140688	C16orf58	chr16	-	31493466	31493524	31492196	31492340	31493602	31493781	47933	35,50	0,0	144110	9,11	157	99	9.62438e-05	0.0154252	1.0,1.0	0.91,0.863	0.113
ENSG00000168066	SF1	chr11	-	64765950	64766155	64764605	64765518	64767191	64767251	25232	60,52	1,0	104122	4,8	304	99	0.00107566	0.0810383	0.951,1.0	0.894,0.832	0.113
ENSG00000149516	MS4A3	chr11	+	60061145	60061316	60056627	60056740	60062467	60062605	81198	153183	7,3	419382	42,29	270	99	0.000670402	0.0597455	0.889,0.957	0.785,0.828	0.117
ENSG00000110583	NAA40	chr11	+	63946950	63947003	63945839	63945935	63952237	63952333	27339	91,97	1,5	120111	15,14	152	99	0.000802383	0.0669773	0.983,0.927	0.839,0.838	0.117
ENSG00000143748	NVL	chr1	-	224326390	224326464	224317877	224317930	224330070	224330137	45769	198189	27,15	317307	73,64	173	99	0.00143821	0.0973937	0.808,0.878	0.713,0.733	0.12
ENSG00000232053	AC078845.1	chr7	+	136177251	136177413	136092912	136093036	136328981	136329097	55463	54,85	0,0	189115	2,12	261	99	0.000340244	0.0380312	1.0,1.0	0.973,0.784	0.121
ENSG00000122203	KIAA1191	chr5	-	176355570	176355749	176348249	176348356	176361601	176361797	39377	48,64	0,0	143,97	4,7	278	99	0.000314072	0.0355959	1.0,1.0	0.927,0.832	0.121
ENSG00000153207	AHCTF1	chr1	-	246843794	246843928	246842693	246842776	246849614	246851442	72065	293318	10,14	602610	65,68	233	99	1.9584e-05	0.00481761	0.926,0.906	0.797,0.792	0.122
ENSG00000167637	ZNF283	chr19	+	43827775	43827940	43827373	43827444	43828201	43828281	14483	49,53	1,0	117,95	11,4	264	99	0.000429312	0.0446086	0.948,1.0	0.8,0.899	0.124
ENSG00000155846	PPARGC1B	chr5	+	149830766	149830883	149826672	149826885	149832655	149833778	66189	36,39	0,1	60,81	4,8	216	99	0.000755158	0.0642594	1.0,0.947	0.873,0.823	0.126
ENSG00000189298	ZKSCAN3	chr6	+	28363691	28363815	28363302	28363385	28365425	28366746	72705	49,52	1,0	114118	7,11	223	99	0.00023464	0.0291915	0.956,1.0	0.878,0.826	0.126
ENSG00000141560	FN3KRP	chr17	+	82720249	82720363	82718905	82719057	82722803	82722886	70565	47,47	0,1	89,84	7,7	213	99	0.000394403	0.0421271	1.0,0.956	0.855,0.848	0.127
ENSG00000166411	IDH3A	chr15	+	78155212	78155275	78149325	78149430	78157572	78157631	55043	32,33	0,1	51,41	2,8	162	99	0.00129158	0.0910727	1.0,0.953	0.94,0.758	0.127
ENSG00000176261	ZBTB8OS	chr1	-	32633950	32634072	32627507	32627544	32650428	32650554	86418	33,45	1,0	70,61	4,7	221	99	0.00088971	0.071421	0.937,1.0	0.887,0.796	0.127
ENSG00000173992	CCS	chr11	+	66593609	66593714	66593240	66593300	66599115	66599253	67928	17,36	0,1	61,74	3,10	204	99	0.00140938	0.0964466	1.0,0.946	0.908,0.782	0.128
ENSG00000183087	GAS6	chr13	-	113848025	113848050	113846526	113846589	113863574	113863741	73629	8,18	0,0	33,26	7,1	124	99	0.00115111	0.0843738	1.0,1.0	0.79,0.954	0.128
ENSG00000135838	NPL	chr1	+	182822114	182822199	182818812	182818859	182825780	182825820	14480	33,30	1,0	97,64	10,6	184	99	0.000559767	0.0528201	0.947,1.0	0.839,0.852	0.128
ENSG00000242802	AP5Z1	chr7	+	4781567	4781754	4781174	4781312	4783315	4783460	60487	23,52	0,0	100,94	4,6	286	99	0.000484688	0.0479096	1.0,1.0	0.896,0.844	0.13
ENSG00000205581	HMGN1	chr21	-	39345829	39345958	39345145	39345274	39347378	39347478	39680	178201	75,77	287306	177230	228	99	0.00119095	0.0867436	0.508,0.531	0.413,0.366	0.13
ENSG00000100722	ZC3H14	chr14	+	88596733	88596808	88577984	88578140	88607242	88607363	83885	108,90	4,2	187243	22,32	174	99	0.000127434	0.0189378	0.939,0.962	0.829,0.812	0.13
ENSG00000006125	AP2B1	chr17	+	35670856	35670898	35657598	35657791	35671753	35671900	359	102119	175224	117,97	458399	141	99	1.08452e-06	0.000525603	0.29,0.272	0.152,0.146	0.132
ENSG00000102967	DHODH	chr16	+	72021123	72021311	72017023	72017106	72022361	72022475	44509	71,86	1,0	118,96	4,9	287	99	0.000268336	0.0319749	0.961,1.0	0.911,0.786	0.132
ENSG00000172728	FUT10	chr8	-	33388962	33389798	33370823	33372804	33453215	33453510	17745	192212	1,0	329281	7,5	935	99	0.000363949	0.0398576	0.953,1.0	0.833,0.856	0.132
ENSG00000137764	MAP2K5	chr15	+	67727915	67727945	67703336	67703408	67748230	67748257	20930	54,38	0,1	84,74	11,10	129	99	2.79975e-05	0.00624816	1.0,0.967	0.854,0.85	0.132
ENSG00000204138	PHACTR4	chr1	+	28457831	28457855	28407409	28407463	28459084	28459258	82905	7,10	34,34	3,1	40,67	123	99	0.000228652	0.0288221	0.142,0.191	0.057,0.012	0.132
ENSG00000109685	NSD2	chr4	+	1939653	1939778	1935143	1935262	1951071	1951180	19022	154201	14,17	314293	63,53	224	99	0.000897304	0.0716762	0.829,0.839	0.688,0.71	0.135
ENSG00000100979	PLTP	chr20	-	45909515	45909671	45907840	45907904	45909941	45910070	17645	61105	1,0	173133	16,7	255	99	1.50654e-05	0.00396105	0.959,1.0	0.808,0.881	0.135
ENSG00000137210	TMEM14B	chr6	+	10770076	10770204	10755141	10755232	10829006	10829165	89602	28,31	0,0	55,64	5,3	227	99	0.00130206	0.0914141	1.0,1.0	0.828,0.903	0.135
ENSG00000151718	WWC2	chr4	+	183193598	183193708	183099256	183099622	183207952	183208156	51298	65,51	0,0	73,91	6,6	209	99	7.32752e-05	0.0127577	1.0,1.0	0.852,0.878	0.135
ENSG00000108021	TASOR2	chr10	+	5735303	5735546	5730486	5731203	5739617	5740497	12868	196187	6,8	337366	36,32	342	99	0.000995697	0.0769044	0.904,0.871	0.73,0.768	0.138
ENSG00000136925	TSTD2	chr9	-	97627305	97627612	97625680	97625997	97633242	97633301	162	113125	0,0	228226	12,6	406	99	1.6107e-05	0.00420088	1.0,1.0	0.822,0.902	0.138
ENSG00000249803	AC112178.1	chr5	+	136504599	136504693	136466644	136466885	136508655	136508743	72009	19,21	0,0	59,61	6,4	193	99	0.000371201	0.0403119	1.0,1.0	0.835,0.887	0.139
ENSG00000144468	RHBDD1	chr2	+	226837547	226837770	226835580	226835663	226864603	226864856	38340	33,30	0,0	92,72	4,4	322	99	0.00145868	0.0981329	1.0,1.0	0.876,0.847	0.139
ENSG00000132541	RIDA	chr8	-	98108645	98108713	98106271	98106326	98117031	98117159	63469	57,73	2,3	114122	21,14	167	99	0.00103306	0.0790212	0.944,0.935	0.763,0.838	0.139
ENSG00000124786	SLC35B3	chr6	-	8419579	8419677	8416883	8416995	8420720	8420828	19345	14,37	1,0	33,29	5,3	197	99	0.00148201	0.0992215	0.876,1.0	0.768,0.829	0.139
ENSG00000232053	AC078845.1	chr7	+	136242149	136242371	136092922	136093036	136328981	136329097	55465	40,43	0,0	156121	2,12	321	99	0.000272903	0.0322821	1.0,1.0	0.96,0.757	0.141
ENSG00000101473	ACOT8	chr20	-	45843526	45843721	45841720	45841956	45844262	45844420	47203	61,89	1,1	141139	12,9	294	99	0.000509654	0.0496221	0.954,0.968	0.798,0.839	0.142
ENSG00000145723	GIN1	chr5	-	103106715	103106909	103104540	103104846	103108568	103108714	86646	40,55	0,1	93,83	4,8	293	99	0.00072745	0.0630369	1.0,0.949	0.887,0.778	0.142
ENSG00000163577	EIF5A2	chr3	-	170894291	170894383	170893348	170893419	170906988	170907093	28793	33,26	0,0	51,63	4,6	191	99	0.00025031	0.0306133	1.0,1.0	0.869,0.845	0.143
ENSG00000032219	ARID4A	chr14	+	58347019	58347117	58346410	58346505	58347646	58347878	86309	31,40	0,0	53,40	5,3	197	99	0.000816854	0.0675624	1.0,1.0	0.842,0.87	0.144
ENSG00000050426	LETMD1	chr12	+	51056143	51056245	51052091	51052207	51056349	51056428	20830	94147	7,4	264275	45,37	201	99	0.000120519	0.0182017	0.869,0.948	0.743,0.785	0.144
ENSG00000108510	MED13	chr17	-	61955679	61955838	61955381	61955567	61956338	61956481	65783	86126	0,0	188174	15,9	258	99	9.25944e-07	0.000469786	1.0,1.0	0.828,0.881	0.145
ENSG00000078177	N4BP2	chr4	+	40097226	40097569	40073454	40073551	40102074	40103218	26836	61,57	0,0	108,98	2,6	442	99	0.00055422	0.0525834	1.0,1.0	0.924,0.785	0.145
ENSG00000130731	METTL26	chr16	-	635280	635340	634663	634797	635611	635774	59332	34,37	0,1	75,84	9,11	159	99	9.76222e-05	0.0155387	1.0,0.958	0.838,0.826	0.147
ENSG00000139350	NEDD1	chr12	+	96907603	96907856	96907237	96907300	96909751	96909895	68917	47,77	0,0	110,65	4,4	352	99	0.000941709	0.0746721	1.0,1.0	0.886,0.82	0.147
ENSG00000114316	USP4	chr3	-	49278813	49278902	49277143	49278451	49280743	49280847	20579	70,80	1,1	189136	16,19	188	99	1.2521e-05	0.00342429	0.974,0.977	0.862,0.79	0.149
ENSG00000176261	ZBTB8OS	chr1	-	32634767	32634792	32627507	32627544	32650428	32650550	86446	17,22	1,0	34,28	4,7	124	99	0.000726317	0.0630369	0.931,1.0	0.872,0.762	0.149
ENSG00000183943	PRKX	chrX	-	3641851	3641971	3626418	3626514	3655148	3655412	81467	83121	4,6	172144	24,23	219	99	0.00105582	0.0801199	0.904,0.901	0.764,0.739	0.151
ENSG00000160310	PRMT2	chr21	+	46636438	46636547	46635673	46635763	46636895	46636990	29116	121131	158138	125132	409377	208	99	2.58238e-09	4.9325e-06	0.267,0.311	0.127,0.143	0.154
ENSG00000087085	ACHE	chr7	-	100892333	100892818	100891168	100891338	100893164	100894252	56005	75,72	1,0	111112	4,5	584	99	0.00137344	0.0949111	0.927,1.0	0.825,0.792	0.155
ENSG00000174197	MGA	chr15	+	41668827	41669958	41660411	41660525	41696074	41697023	73662	296329	1,1	620570	10,13	1230	99	0.000231528	0.0289708	0.96,0.964	0.833,0.779	0.156
ENSG00000182986	ZNF320	chr19	-	52891228	52891346	52890240	52890328	52897647	52897684	67410	33,41	1,0	40,44	6,3	217	99	0.00059211	0.0553278	0.938,1.0	0.753,0.87	0.157
ENSG00000100722	ZC3H14	chr14	+	88602827	88603060	88577984	88578140	88607242	88607363	83892	134176	4,2	343294	22,32	332	99	7.36741e-05	0.0127588	0.909,0.963	0.823,0.733	0.158
ENSG00000163867	ZMYM6	chr1	-	35030546	35030756	35020382	35020467	35031814	35031945	57493	44,58	0,0	126121	9,6	309	99	5.37744e-05	0.0102411	1.0,1.0	0.818,0.866	0.158
ENSG00000196118	CCDC189	chr16	-	30760605	30760668	30760036	30760453	30761197	30761229	18267	23,14	1,0	12,27	1,6	162	99	0.00120768	0.087015	0.934,1.0	0.88,0.733	0.161
ENSG00000171204	TMEM126B	chr11	+	85631144	85631316	85628572	85628688	85631686	85631791	737	388453	188214	481556	540479	271	99	5.9161e-08	5.56758e-05	0.43,0.436	0.246,0.298	0.161
ENSG00000130958	SLC35D2	chr9	-	96351102	96351171	96345298	96345401	96360153	96360192	18734	17,26	0,1	75,74	12,9	168	99	0.000338681	0.0379988	1.0,0.939	0.786,0.829	0.162
ENSG00000159733	ZFYVE28	chr4	-	2335704	2335794	2328533	2329142	2337406	2337496	21349	29,19	0,0	37,31	4,3	189	99	0.00118244	0.0863471	1.0,1.0	0.829,0.844	0.163
ENSG00000107443	CCNJ	chr10	+	96050255	96050466	96044352	96044462	96056700	96057000	24318	32,60	0,0	74,51	5,3	310	99	0.000420766	0.0442135	1.0,1.0	0.825,0.844	0.165
ENSG00000135363	LMO2	chr11	-	33869345	33869586	33864601	33864817	33891794	33892076	58900	54,74	0,0	114130	4,11	340	99	2.5422e-05	0.00581322	1.0,1.0	0.892,0.775	0.166
ENSG00000102287	GABRE	chrX	-	151971139	151971317	151970056	151970402	151974569	151974664	24570	41,67	0,1	101,72	7,7	277	99	0.000150862	0.0212694	1.0,0.96	0.838,0.786	0.168
ENSG00000139631	CSAD	chr12	-	53172345	53172436	53171877	53171988	53173344	53173374	20512	25,17	0,0	69,74	6,10	190	99	7.6711e-05	0.0131099	1.0,1.0	0.857,0.794	0.174
ENSG00000071243	ING3	chr7	+	120964741	120964838	120955558	120955624	120966625	120966697	40943	91,83	6,11	152159	34,47	196	99	0.000859051	0.0695392	0.885,0.792	0.693,0.631	0.177
ENSG00000163319	MRPS18C	chr4	+	83458345	83458429	83456908	83456958	83459739	83459797	37591	496511	48,53	893866	240237	183	99	2.10366e-10	7.19029e-07	0.848,0.839	0.668,0.664	0.177
ENSG00000012124	CD22	chr19	+	35338167	35338431	35337754	35338021	35340880	35341138	24913	35,52	0,0	121,72	6,5	363	99	0.000107189	0.0167334	1.0,1.0	0.846,0.797	0.178
ENSG00000109066	TMEM104	chr17	+	74788788	74788870	74777263	74777375	74790199	74790296	62087	24,30	0,0	42,51	5,6	181	99	6.58994e-05	0.011693	1.0,1.0	0.821,0.823	0.178
ENSG00000197343	ZNF655	chr7	+	99561887	99561973	99560506	99560695	99562367	99562494	53171	136114	15,12	108118	31,33	185	99	0.000303619	0.0347141	0.829,0.836	0.651,0.657	0.178
ENSG00000075790	BCAP29	chr7	+	107613653	107613732	107613331	107613432	107615245	107615874	11579	12,13	0,0	44,47	6,5	178	99	0.000234635	0.0291915	1.0,1.0	0.803,0.839	0.179
ENSG00000100077	GRK3	chr22	+	25702841	25702991	25695106	25695214	25703509	25703576	3108	3,5	7,7	1,0	42,23	249	99	0.000271952	0.0322821	0.146,0.221	0.009,0.0	0.179
ENSG00000108825	PTGES3L-AARSD1	chr17	-	42979549	42979773	42979377	42979444	42980045	42980086	36178	28,37	0,0	53,46	5,2	323	99	0.000449603	0.0456335	1.0,1.0	0.765,0.876	0.179
ENSG00000171295	ZNF440	chr19	+	11830273	11830409	11814343	11814450	11830616	11830677	33186	39,47	0,2	76,57	8,8	235	99	0.000995914	0.0769044	1.0,0.908	0.8,0.75	0.179
ENSG00000232931	LINC00342	chr2	-	95814670	95814791	95814049	95814145	95816723	95817831	42760	25,28	0,0	36,45	4,4	220	99	0.000347324	0.0385571	1.0,1.0	0.802,0.835	0.181
ENSG00000123349	PFDN5	chr12	+	53296453	53296551	53295541	53295639	53298044	53298150	1801	8,6	10,16	9,8	104,91	197	99	0.00072094	0.0627605	0.287,0.159	0.042,0.042	0.181
ENSG00000120915	EPHX2	chr8	+	27516319	27516398	27511835	27511910	27518037	27518072	55826	53,73	1,5	73,57	20,7	178	99	0.00110253	0.0822184	0.967,0.89	0.67,0.819	0.184
ENSG00000237943	PRKCQ-AS1	chr10	+	6582137	6582201	6580424	6580927	6583675	6584028	82503	59,76	34,50	74,65	101,87	163	99	0.000272751	0.0322821	0.513,0.48	0.308,0.312	0.186
ENSG00000154144	TBRG1	chr11	+	124626472	124626609	124625670	124625903	124626903	124627050	22056	40,42	29,31	53,48	108,90	236	99	5.94355e-05	0.0109036	0.367,0.362	0.171,0.183	0.188
ENSG00000011332	DPF1	chr19	-	38216352	38216403	38216139	38216259	38217459	38217591	32858	11,8	0,0	31,30	2,8	150	99	8.74796e-05	0.0144083	1.0,1.0	0.911,0.712	0.189
ENSG00000166348	USP54	chr10	-	73504849	73504990	73500654	73500838	73505322	73505426	27155	16,19	0,0	32,42	5,2	240	99	0.000540394	0.0518136	1.0,1.0	0.725,0.897	0.189
ENSG00000132740	IGHMBP2	chr11	+	68906068	68906384	68903925	68904038	68908144	68908192	3942	37,21	0,0	57,46	4,2	415	99	0.00129688	0.0913472	1.0,1.0	0.773,0.846	0.191
ENSG00000168137	SETD5	chr3	+	9433369	9433562	9429826	9430051	9433844	9433878	14775	86103	29,25	155122	88,89	292	99	0.00028523	0.0333154	0.501,0.583	0.374,0.317	0.197
ENSG00000270011	ZNF559-ZNF177	chr19	+	9337795	9337858	9324694	9324780	9338493	9338582	70181	11,18	1,0	16,20	3,5	162	99	0.000973977	0.0761032	0.871,1.0	0.765,0.71	0.198
ENSG00000107968	MAP3K8	chr10	+	30437175	30437406	30434664	30434748	30438915	30439274	33776	58,55	2,0	62,63	4,9	330	99	0.000966667	0.0758907	0.897,1.0	0.823,0.677	0.199
ENSG00000175792	RUVBL1	chr3	-	128068635	128068913	128064777	128065220	128082482	128082574	42342	10,21	0,0	54,53	3,4	377	99	0.000619884	0.0569677	1.0,1.0	0.825,0.777	0.199
ENSG00000237298	TTN-AS1	chr2	+	178600557	178600667	178597595	178597681	178615322	178615374	27911	9,8	0,0	33,34	3,5	209	99	0.000171028	0.0234799	1.0,1.0	0.839,0.763	0.199
ENSG00000198920	KIAA0753	chr17	-	6611918	6612148	6609993	6610160	6620787	6620998	73198	58,58	0,0	87,88	2,13	329	99	1.94895e-05	0.00481761	1.0,1.0	0.929,0.671	0.2
ENSG00000166762	CATSPER2	chr15	-	43647916	43648066	43647293	43647467	43664417	43664543	83123	15,27	0,0	31,27	4,2	249	99	0.00105781	0.0801199	1.0,1.0	0.755,0.843	0.201
ENSG00000143363	PRUNE1	chr1	+	151018556	151018669	151017811	151017904	151027232	151027327	69902	7,13	0,0	21,51	4,3	212	99	0.000820659	0.067677	1.0,1.0	0.71,0.888	0.201
ENSG00000281706	AL009179.1	chr6	+	27707338	27707416	27702313	27702417	27710123	27710222	17159	6,1	6,5	0,1	11,11	177	99	0.00114875	0.0843738	0.359,0.101	0.0,0.048	0.206
ENSG00000141556	TBCD	chr17	+	82909284	82909307	82905935	82906053	82911757	82911765	58976	19,17	0,1	31,19	4,8	122	99	0.000290633	0.0338249	1.0,0.932	0.863,0.658	0.206
ENSG00000010310	GIPR	chr19	+	45677709	45677779	45676948	45677108	45677905	45677994	29348	21,16	1,0	27,19	8,2	169	99	0.000421425	0.0442135	0.925,1.0	0.664,0.848	0.207
ENSG00000224184	MIR3681HG	chr2	+	12308687	12308784	12277731	12277873	12558205	12558444	79586	16,12	0,0	24,21	2,4	196	99	0.00113273	0.0835929	1.0,1.0	0.858,0.726	0.208
ENSG00000111877	MCM9	chr6	-	118826146	118826292	118813441	118816294	118826781	118826864	13087	30,16	0,0	34,30	2,5	245	99	0.000238935	0.0296124	1.0,1.0	0.873,0.708	0.21
ENSG00000132256	TRIM5	chr11	-	5667688	5667711	5665980	5666081	5678203	5678434	11536	22,19	2,0	29,17	8,5	122	99	0.00110398	0.0822184	0.899,1.0	0.746,0.734	0.21
ENSG00000239665	AL157392.3	chr10	+	13648625	13648768	13648084	13648230	13652407	13652460	71365	1,23	0,0	26,29	3,3	242	99	0.00120992	0.087015	1.0,1.0	0.78,0.798	0.211
ENSG00000123636	BAZ2B	chr2	-	159400598	159400664	159398828	159398894	159404848	159404901	87854	12,18	0,0	19,38	5,3	165	99	0.000142897	0.0204406	1.0,1.0	0.695,0.884	0.211
ENSG00000172765	TMCC1	chr3	-	129857249	129857405	129848342	129848412	129893493	129893576	51609	17,16	0,0	18,41	2,4	255	99	0.00120452	0.0870121	1.0,1.0	0.777,0.799	0.212
ENSG00000172244	C5orf34	chr5	-	43509144	43509375	43508576	43508666	43514805	43515148	88437	87,73	3,1	168119	12,22	330	99	0.000783556	0.065938	0.897,0.956	0.808,0.619	0.213
ENSG00000141564	RPTOR	chr17	+	80885007	80885148	80880414	80880489	80891719	80891837	44947	26,49	0,0	98,80	9,11	240	99	4.92134e-06	0.00166459	1.0,1.0	0.818,0.75	0.216
ENSG00000175061	SNHG29	chr17	+	16462832	16462941	16440184	16440253	16470301	16470350	20297	4,8	0,0	30,26	8,1	208	99	3.40295e-05	0.00724573	1.0,1.0	0.641,0.925	0.217
ENSG00000108021	TASOR2	chr10	+	5712393	5712539	5684941	5685175	5712822	5712918	12856	47,42	1,2	64,71	11,12	245	99	0.000639287	0.0580651	0.95,0.895	0.702,0.705	0.219
ENSG00000137074	APTX	chr9	-	32997242	32997348	32989758	32989895	33024803	33025130	8259	21,13	0,1	51,60	14,8	205	99	0.000224333	0.0285659	1.0,0.863	0.638,0.784	0.22
ENSG00000175105	ZNF654	chr3	+	88126133	88126269	88113114	88113196	88128808	88129011	43048	20,13	0,0	30,29	3,4	235	99	0.0003512	0.0389208	1.0,1.0	0.808,0.753	0.22
ENSG00000185842	DNAH14	chr1	+	224974090	224974153	224968758	224968874	225002782	225002927	50059	11,9	0,1	8,26	2,7	162	99	0.00105322	0.0801199	1.0,0.846	0.71,0.694	0.221
ENSG00000114030	KPNA1	chr3	-	122457725	122457848	122453869	122454001	122459773	122460657	6485	7,8	0,0	31,26	1,7	222	99	0.000149033	0.021111	1.0,1.0	0.933,0.624	0.222
ENSG00000151470	C4orf33	chr4	+	129109306	129109358	129106586	129106647	129109472	129109672	61714	62,84	0,1	71,65	11,16	151	99	7.57336e-09	1.11186e-05	1.0,0.982	0.809,0.727	0.223
ENSG00000127419	TMEM175	chr4	+	952366	952450	951645	951717	953189	953303	31657	54,57	2,3	78,87	19,19	183	99	5.64208e-05	0.0105898	0.936,0.911	0.69,0.712	0.223
ENSG00000141956	PRDM15	chr21	-	41810752	41810836	41804533	41804614	41815704	41815836	68163	10,8	1,0	24,25	4,8	183	99	0.00122678	0.0878938	0.844,1.0	0.764,0.628	0.226
ENSG00000082898	XPO1	chr2	-	61525491	61526521	61522610	61522683	61537561	61538231	77388	66,64	1,0	172190	5,9	1129	99	0.000625229	0.0571866	0.853,1.0	0.751,0.649	0.227
ENSG00000135363	LMO2	chr11	-	33869709	33869987	33869345	33869586	33891794	33892076	58902	7,15	0,0	33,46	3,3	377	99	0.000955499	0.0751235	1.0,1.0	0.743,0.801	0.228
ENSG00000205592	MUC19	chr12	+	40539528	40539561	40538793	40538847	40541618	40541623	52569	13,17	0,1	13,16	3,5	132	99	0.000608574	0.0563794	1.0,0.927	0.765,0.706	0.228
ENSG00000135049	AGTPBP1	chr9	-	85678334	85678398	85677435	85677582	85681267	85681335	39226	8,12	0,1	20,24	3,9	163	99	0.000829841	0.0679128	1.0,0.879	0.802,0.618	0.23
ENSG00000166762	CATSPER2	chr15	-	43649726	43649879	43647916	43648066	43664417	43664543	83127	12,10	0,0	25,18	5,1	252	99	0.000497758	0.0486828	1.0,1.0	0.663,0.876	0.23
ENSG00000215126	CBWD6	chr9	-	41156382	41156439	41145280	41145332	41162332	41162377	83071	3,7	0,0	23,27	3,7	156	99	4.52118e-05	0.00900562	1.0,1.0	0.83,0.71	0.23
ENSG00000115504	EHBP1	chr2	+	62949093	62949162	62948291	62948316	62955516	62955660	49589	21,25	0,1	27,26	9,3	168	99	0.000122099	0.0183903	1.0,0.936	0.639,0.836	0.23
ENSG00000143847	PPFIA4	chr1	+	203056783	203056950	203056374	203056508	203059177	203059271	57858	10,29	0,0	35,32	6,2	266	99	2.31704e-05	0.00539403	1.0,1.0	0.685,0.856	0.23
ENSG00000134759	ELP2	chr18	+	36141136	36141201	36138269	36138426	36142825	36142857	79182	7,5	0,0	16,12	5,1	164	99	0.000618651	0.0569677	1.0,1.0	0.659,0.879	0.231
ENSG00000261008	LINC01572	chr16	-	72570434	72570515	72540577	72540611	72664891	72664947	29489	11,3	0,0	20,15	4,2	180	99	0.000708221	0.0620323	1.0,1.0	0.733,0.805	0.231
ENSG00000169062	UPF3A	chr13	+	114286258	114286400	114282836	114282943	114286518	114286629	2451	144146	45,34	171132	98112	241	99	5.69526e-06	0.0018042	0.568,0.638	0.418,0.326	0.231
ENSG00000049541	RFC2	chr7	-	74243145	74243246	74238922	74238988	74249738	74249780	52977	11,15	0,0	24,16	1,5	200	99	0.00144403	0.0976183	1.0,1.0	0.922,0.613	0.232
ENSG00000123191	ATP7B	chr13	-	51958310	51958544	51957515	51957607	51960147	51960322	68834	76110	4,3	186119	26,22	333	99	7.54367e-05	0.0130293	0.85,0.916	0.68,0.617	0.234
ENSG00000185619	PCGF3	chr4	+	732399	732498	730969	731110	733671	733789	7457	39,39	13,15	57,39	51,41	198	99	0.000526552	0.0508859	0.6,0.565	0.358,0.322	0.243
ENSG00000173715	C11orf80	chr11	+	66800640	66800696	66795896	66796364	66803994	66804194	45583	8,14	0,0	12,18	4,2	155	99	0.000717448	0.0626243	1.0,1.0	0.657,0.852	0.246
ENSG00000131791	PRKAB2	chr1	-	147167766	147167933	147166845	147166939	147171988	147172167	13396	44,43	0,0	63,59	9,6	266	99	2.17752e-06	0.000878339	1.0,1.0	0.723,0.785	0.246
ENSG00000132780	NASP	chr1	+	45604935	45605016	45591222	45591270	45613168	45613248	71987	10,13	0,1	12,29	3,7	180	99	0.000753358	0.0642594	1.0,0.877	0.688,0.695	0.247
ENSG00000124588	NQO2	chr6	+	3002049	3002286	2993930	2994053	3006467	3006559	975	51,91	10,17	97,81	57,39	336	99	7.84549e-05	0.0133029	0.6,0.612	0.334,0.38	0.249
ENSG00000111364	DDX55	chr12	+	123617757	123617872	123615184	123615316	123619447	123619716	30734	8,12	0,1	23,15	8,2	214	99	0.00104047	0.0794945	1.0,0.847	0.571,0.776	0.25
ENSG00000255526	NEDD8-MDP1	chr14	-	24231651	24231867	24218132	24218215	24232249	24232285	63310	12,21	0,0	31,24	4,2	315	99	0.000342754	0.0381149	1.0,1.0	0.709,0.79	0.25
ENSG00000074621	SLC24A1	chr15	+	65639594	65639703	65623954	65625970	65650381	65650942	15691	4,5	0,0	14,23	2,4	208	99	0.000615719	0.0569601	1.0,1.0	0.769,0.732	0.25
ENSG00000104325	DECR1	chr8	+	90005447	90005845	90005291	90005369	90017123	90017326	20854	18,28	0,0	65,66	6,3	497	99	1.78479e-05	0.00452765	1.0,1.0	0.683,0.814	0.252
ENSG00000164256	PRDM9	chr5	+	23462671	23462807	23443585	23443624	23493470	23493615	5102	2,5	0,0	18,20	5,1	235	99	0.000596724	0.0555193	1.0,1.0	0.603,0.894	0.252
ENSG00000133678	TMEM254	chr10	+	80081639	80081734	80079272	80079307	80081840	80081944	21536	1,2	0,1	1,0	0,5	194	99	0.000536516	0.0516347	1.0,0.505	1.0,0.0	0.252
ENSG00000179532	DNHD1	chr11	+	6538382	6538510	6533680	6533806	6538611	6538810	26413	13,9	0,1	29,13	4,5	227	99	0.00143374	0.097306	1.0,0.797	0.76,0.531	0.253
ENSG00000226476	LINC01748	chr1	-	60600126	60600270	60595506	60596373	60640010	60640126	14624	16,16	0,1	17,13	4,2	243	99	0.00132047	0.0923032	1.0,0.867	0.634,0.726	0.254
ENSG00000129559	NEDD8	chr14	-	24231651	24231737	24218132	24218215	24232249	24232325	21609	7,6	0,0	18,13	4,2	185	99	0.000419859	0.0442135	1.0,1.0	0.707,0.777	0.258
ENSG00000125354	SEPTIN6	chrX	-	119618712	119618786	119616711	119616742	119625334	119625379	26654	15,7	0,0	29,15	3,5	173	99	2.95185e-05	0.00653044	1.0,1.0	0.847,0.632	0.26
ENSG00000005436	GCFC2	chr2	-	75702312	75702423	75701189	75701287	75706522	75706651	86947	60,66	4,10	70,73	27,27	210	99	0.000256464	0.0309966	0.876,0.757	0.55,0.56	0.261
ENSG00000122203	KIAA1191	chr5	-	176359480	176359567	176348249	176348356	176361601	176361761	39386	4,10	0,0	34,25	4,7	186	99	1.82133e-05	0.00459561	1.0,1.0	0.819,0.655	0.263
ENSG00000144395	CCDC150	chr2	+	196677114	196677192	196676553	196676731	196677292	196677361	52922	9,12	0,0	16,28	3,6	177	99	4.87855e-05	0.00948571	1.0,1.0	0.749,0.723	0.264
ENSG00000067365	METTL22	chr16	+	8644528	8644725	8642462	8642565	8646107	8646218	39904	14,11	0,0	35,32	4,4	296	99	5.73056e-05	0.0106941	1.0,1.0	0.745,0.728	0.264
ENSG00000140525	FANCI	chr15	+	89245194	89245311	89243989	89244044	89245755	89245839	92823	8,13	0,1	19,24	5,5	216	99	0.000933049	0.0740759	1.0,0.856	0.635,0.688	0.266
ENSG00000126467	TSKS	chr19	-	49740058	49740183	49739756	49739932	49741884	49742020	73748	11,28	0,0	21,30	4,4	224	99	3.61778e-05	0.00757891	1.0,1.0	0.699,0.768	0.266
ENSG00000134684	YARS1	chr1	-	32797591	32797638	32786939	32787075	32797762	32797843	78418	5,9	0,1	22,12	5,6	146	99	0.00120398	0.0870121	1.0,0.859	0.749,0.576	0.267
ENSG00000126070	AGO3	chr1	+	35931228	35931445	35930717	35930798	35945691	35945863	20381	9,21	0,0	49,26	2,6	316	99	3.54418e-05	0.00747292	1.0,1.0	0.885,0.576	0.27
ENSG00000196912	ANKRD36B	chr2	-	97580461	97580568	97560831	97560860	97584943	97585117	16522	8,8	0,0	23,14	5,2	206	99	5.99661e-05	0.0109366	1.0,1.0	0.689,0.771	0.27
ENSG00000179818	PCBP1-AS1	chr2	-	70085815	70085930	70085546	70085624	70086977	70086996	57421	5,11	0,0	17,12	5,1	214	99	0.000232549	0.0290427	1.0,1.0	0.611,0.847	0.271
ENSG00000225470	JPX	chrX	+	73946998	73947374	73944326	73944662	73962734	73962801	82606	93,69	1,1	125107	14,10	475	99	1.95922e-05	0.00481761	0.951,0.935	0.65,0.69	0.273
ENSG00000135976	ANKRD36	chr2	+	97124459	97124597	97122886	97122993	97127066	97127134	38622	5,6	0,0	18,28	2,6	237	99	5.06066e-06	0.00166827	1.0,1.0	0.79,0.661	0.274
ENSG00000166747	AP1G1	chr16	-	71808014	71808150	71789278	71789482	71808504	71808677	33643	19,12	1,0	18,17	6,2	235	99	0.000625019	0.0571866	0.889,1.0	0.558,0.782	0.274
ENSG00000180902	D2HGDH	chr2	+	241754630	241754746	241750150	241750294	241755044	241756014	4653	14,17	0,0	13,16	3,2	215	99	0.00139135	0.0957175	1.0,1.0	0.666,0.786	0.274
ENSG00000017260	ATP2C1	chr3	+	130894707	130894775	130893990	130894337	130930415	130930526	24219	35,29	4,2	45,46	11,30	167	99	0.00144454	0.0976183	0.838,0.896	0.708,0.476	0.275
ENSG00000280670	CCDC163	chr1	-	45496555	45496623	45495417	45495545	45497298	45497383	29406	7,13	0,0	25,20	8,3	167	99	6.63885e-06	0.00204332	1.0,1.0	0.649,0.798	0.276
ENSG00000100325	ASCC2	chr22	-	29827476	29827600	29825621	29825780	29838177	29838274	53974	5,5	0,0	14,20	2,4	223	99	0.000313423	0.0355845	1.0,1.0	0.757,0.689	0.277
ENSG00000138674	SEC31A	chr4	-	82862533	82862572	82861630	82861708	82863317	82863392	54609	93106	23,20	216199	145165	138	99	1.24799e-09	2.74137e-06	0.744,0.792	0.517,0.464	0.277
ENSG00000017260	ATP2C1	chr3	+	130894589	130894775	130893967	130894337	130930415	130930526	24218	53,59	4,2	77,76	11,30	285	99	0.00105908	0.0801199	0.822,0.911	0.709,0.468	0.278
ENSG00000090857	PDPR	chr16	+	70114820	70114930	70114331	70114440	70120460	70120719	21682	12,20	7,12	8,20	29,37	209	99	0.000384726	0.0414343	0.448,0.441	0.116,0.204	0.284
ENSG00000047578	KIAA0556	chr16	+	27699533	27699599	27698327	27698500	27701588	27701695	36806	12,6	0,0	12,13	3,3	165	99	0.000303533	0.0347141	1.0,1.0	0.706,0.722	0.286
ENSG00000126091	ST3GAL3	chr1	+	43858134	43858308	43838218	43838311	43879334	43879507	79790	5,10	0,0	39,24	9,2	273	99	5.17823e-06	0.00168987	1.0,1.0	0.611,0.813	0.288
ENSG00000165801	ARHGEF40	chr14	+	21083834	21084050	21082830	21082917	21084752	21084923	29180	3,9	0,0	18,16	4,1	315	99	0.000993676	0.0769044	1.0,1.0	0.586,0.834	0.29
ENSG00000118518	RNF146	chr6	+	127285207	127285348	127282286	127282395	127286049	127286097	73397	12,6	1,0	17,17	8,2	240	99	0.00121399	0.0872113	0.832,1.0	0.467,0.778	0.293
ENSG00000166435	XRRA1	chr11	-	74851087	74851203	74848114	74848462	74862980	74863021	4116	18,27	1,1	34,35	16,6	215	99	0.000649796	0.0586144	0.892,0.926	0.495,0.729	0.297
ENSG00000166140	ZFYVE19	chr15	+	40812698	40812902	40810648	40810757	40813337	40813417	39348	153188	1,2	243208	40,31	303	99	1.39666e-13	1.81404e-09	0.98,0.968	0.665,0.687	0.298
ENSG00000280828	AC090114.3	chr7	+	128577963	128578033	128574719	128574791	128578889	128578933	59346	24,38	6,10	38,34	35,31	169	99	0.000116057	0.0176925	0.701,0.69	0.389,0.391	0.305
ENSG00000007341	ST7L	chr1	-	112618246	112618369	112616812	112616895	112619196	112619664	72056	10,11	0,0	12,20	3,3	222	99	0.000155209	0.0217233	1.0,1.0	0.641,0.748	0.305
ENSG00000135365	PHF21A	chr11	-	45946075	45946098	45938156	45938312	45948885	45948946	65913	6,1	0,0	8,8	6,1	122	99	0.000104359	0.0163703	1.0,1.0	0.52,0.867	0.306
ENSG00000163686	ABHD6	chr3	+	58249877	58249942	58237791	58237916	58256561	58256705	21539	2,7	0,0	16,7	4,2	164	99	0.000297348	0.0343326	1.0,1.0	0.707,0.679	0.307
ENSG00000158062	UBXN11	chr1	-	26300925	26301024	26297961	26298062	26301693	26301722	17243	32,39	12,11	15,19	19,21	198	99	0.000171737	0.0234799	0.571,0.639	0.283,0.311	0.308
ENSG00000111452	ADGRD1	chr12	+	130981883	130982063	130966462	130971580	130987094	130987349	47364	7,9	0,0	29,13	2,4	279	99	0.000254827	0.0308749	1.0,1.0	0.837,0.536	0.314
ENSG00000165810	BTNL9	chr5	+	181058351	181058378	181053468	181053501	181059236	181059312	82479	2,4	0,0	8,8	2,4	126	99	0.000136007	0.0197604	1.0,1.0	0.759,0.611	0.315
ENSG00000073584	SMARCE1	chr17	-	40630207	40630286	40627780	40629568	40630713	40630924	14317	11,11	0,0	28,50	9,10	178	99	1.32889e-05	0.00359586	1.0,1.0	0.634,0.736	0.315
ENSG00000188818	ZDHHC11	chr5	-	823388	824093	821860	821895	825163	825251	60432	5,6	0,0	35,41	1,4	804	99	0.000493186	0.0484113	1.0,1.0	0.812,0.558	0.315
ENSG00000254536	AL360181.3	chr10	+	133391311	133391491	133389589	133389747	133395712	133395777	28666	15,11	0,0	13,14	4,1	279	99	0.00082292	0.0677339	1.0,1.0	0.536,0.832	0.316
ENSG00000248932	AC046134.2	chr3	+	139419556	139419680	139389760	139389933	139423015	139423114	53642	10,23	0,0	38,15	8,3	223	99	8.83291e-06	0.00257232	1.0,1.0	0.678,0.689	0.317
ENSG00000196646	ZNF136	chr19	+	12185784	12185911	12163095	12163206	12186113	12186157	60480	26,25	0,1	66,43	11,15	226	99	7.85974e-06	0.00235487	1.0,0.916	0.724,0.557	0.317
ENSG00000137343	ATAT1	chr6	+	30642767	30643011	30642175	30642247	30645894	30645974	68132	11,2	0,0	26,17	4,2	343	99	0.000149148	0.021111	1.0,1.0	0.652,0.71	0.319
ENSG00000130669	PAK4	chr19	+	39168229	39168312	39125797	39125919	39169531	39169757	43370	18,28	2,3	37,26	17,15	182	99	0.000509291	0.0496221	0.83,0.835	0.542,0.485	0.319
ENSG00000143776	CDC42BPA	chr1	-	227051880	227051985	227047926	227048010	227068653	227068701	5487	9,25	1,0	29,55	19,9	204	99	6.14799e-05	0.0110599	0.814,1.0	0.426,0.748	0.32
ENSG00000070476	ZXDC	chr3	-	126441764	126441946	126439631	126439727	126459652	126459737	24014	10,10	0,0	41,25	1,12	281	99	8.24582e-05	0.0138015	1.0,1.0	0.935,0.423	0.321
ENSG00000114796	KLHL24	chr3	+	183636220	183636311	183635622	183635793	183650295	183650575	70695	2,6	0,0	20,8	3,3	190	99	0.000203335	0.0266767	1.0,1.0	0.776,0.581	0.322
ENSG00000128829	EIF2AK4	chr15	+	40032756	40032801	40030358	40030456	40034325	40034444	8055	12,9	0,0	25,16	2,13	144	99	3.17697e-06	0.00119953	1.0,1.0	0.896,0.458	0.323
ENSG00000262468	LINC01569	chr16	-	4246988	4247061	4246007	4246860	4251321	4251864	42192	8,2	0,0	9,12	2,4	172	99	0.000102504	0.0161966	1.0,1.0	0.721,0.633	0.323
ENSG00000245060	LINC00847	chr5	+	180831735	180831806	180830987	180831229	180834311	180835646	59288	9,6	0,1	18,20	12,6	170	99	0.000291868	0.0339078	1.0,0.777	0.466,0.66	0.326
ENSG00000163312	HELQ	chr4	-	83446834	83447035	83446013	83446086	83448782	83448961	42064	24,27	0,1	38,45	11,6	300	99	3.42677e-05	0.0072489	1.0,0.899	0.533,0.712	0.327
ENSG00000169432	SCN9A	chr2	-	166203954	166204225	166195184	166199864	166204359	166204464	84030	8,12	1,0	13,6	5,1	370	99	0.000973596	0.0761032	0.682,1.0	0.41,0.616	0.328
ENSG00000205592	MUC19	chr12	+	40544829	40544883	40544638	40544692	40545049	40545097	52570	4,7	1,0	9,5	5,3	153	99	0.000652729	0.0587112	0.721,1.0	0.538,0.519	0.332
ENSG00000188321	ZNF559	chr19	+	9337795	9337865	9324694	9324780	9338493	9338582	91542	6,6	1,0	5,14	3,5	169	99	0.00119576	0.0867656	0.779,1.0	0.494,0.621	0.332
ENSG00000153094	BCL2L11	chr2	+	111153779	111153904	111123732	111124139	111164132	111164231	30377	3,7	0,0	14,16	5,2	224	99	1.12659e-05	0.00312663	1.0,1.0	0.553,0.78	0.333
ENSG00000022277	RTF2	chr20	+	56470599	56470941	56468657	56468766	56471613	56471669	23674	15,23	1,0	46,42	8,8	441	99	0.000208523	0.027138	0.771,1.0	0.563,0.541	0.333
ENSG00000010626	LRRC23	chr12	+	6912729	6913027	6909889	6910026	6913890	6914194	46759	15,20	0,0	36,53	5,6	397	99	1.56692e-05	0.00410319	1.0,1.0	0.642,0.688	0.335
ENSG00000214922	HLA-F-AS1	chr6	-	29745472	29745727	29738550	29738886	29748899	29748993	18542	7,17	1,0	20,18	5,6	354	99	0.00045017	0.0456335	0.662,1.0	0.528,0.456	0.339
ENSG00000261008	LINC01572	chr16	-	72555264	72555326	72540577	72540611	72664891	72664947	29486	6,15	0,0	13,6	4,2	161	99	0.000112177	0.0172701	1.0,1.0	0.666,0.648	0.343
ENSG00000243144	AC079760.2	chr7	+	91493394	91493535	91466844	91466878	91496502	91496601	47992	7,7	0,0	34,19	4,7	240	99	2.76906e-06	0.00107041	1.0,1.0	0.778,0.528	0.347
ENSG00000174780	SRP72	chr4	+	56478591	56478649	56476670	56476702	56484735	56484864	22156	5,2	0,0	17,7	3,4	157	99	2.6323e-05	0.00596004	1.0,1.0	0.781,0.525	0.347
ENSG00000010270	STARD3NL	chr7	+	38179089	38179145	38178350	38178420	38201713	38201966	78819	9,4	0,0	9,10	5,2	155	99	9.72485e-06	0.00274587	1.0,1.0	0.535,0.762	0.351
ENSG00000226383	LINC01876	chr2	-	156024484	156024576	156022671	156022817	156205381	156205438	31912	9,1	0,0	7,8	1,4	191	99	0.00044966	0.0456335	1.0,1.0	0.784,0.509	0.353
ENSG00000248498	ASNSP1	chr8	-	46593454	46593586	46580081	46580237	46595114	46595241	48700	12,8	0,0	23,31	5,8	231	99	1.00414e-05	0.00282297	1.0,1.0	0.663,0.624	0.357
ENSG00000126456	IRF3	chr19	-	49664552	49664673	49663342	49663514	49665634	49665847	23145	10,8	0,0	16,18	2,8	220	99	1.11283e-06	0.000531392	1.0,1.0	0.783,0.503	0.357
ENSG00000145354	CISD2	chr4	+	102874509	102874671	102869053	102869187	102882770	102882873	41852	7,5	1,0	16,9	4,5	261	99	0.00143485	0.097306	0.726,1.0	0.603,0.406	0.359
ENSG00000115607	IL18RAP	chr2	+	102423810	102424135	102423177	102423347	102424230	102424414	54852	29,15	0,0	42,41	12,2	424	99	2.12586e-06	0.000868287	1.0,1.0	0.45,0.827	0.362
ENSG00000088543	C3orf18	chr3	-	50566005	50566094	50565465	50565861	50567462	50567625	66365	6,3	0,1	4,2	1,4	188	99	0.00137379	0.0949111	1.0,0.612	0.678,0.208	0.363
ENSG00000124334	IL9R	chrX	+	156003448	156003560	156002881	156003019	156004419	156004565	19777	7,13	0,0	14,6	3,2	211	99	0.000375592	0.0405907	1.0,1.0	0.686,0.585	0.365
ENSG00000146733	PSPH	chr7	-	56043147	56043261	56033960	56034106	56051137	56051604	32751	16,11	0,1	11,7	4,3	213	99	0.000154337	0.0216478	1.0,0.836	0.561,0.52	0.377
ENSG00000141380	SS18	chr18	-	26068493	26068557	26064831	26064871	26078075	26078160	5198	5,2	0,1	7,1	6,1	163	99	0.000967595	0.0758907	1.0,0.548	0.415,0.378	0.378
ENSG00000255036	STRA6LP	chr9	+	97293946	97294110	97290583	97290665	97307735	97307806	8289	5,8	0,0	10,11	5,1	263	99	5.82928e-05	0.0107853	1.0,1.0	0.43,0.805	0.382
ENSG00000166793	YPEL4	chr11	-	57646750	57646794	57646296	57646405	57646966	57647202	84456	6,1	0,0	7,7	3,3	143	99	9.05869e-05	0.0146706	1.0,1.0	0.618,0.618	0.382
ENSG00000130940	CASZ1	chr1	-	10655648	10655813	10654418	10654591	10656645	10656736	49619	6,12	0,0	17,12	2,5	264	99	5.06006e-06	0.00166827	1.0,1.0	0.761,0.474	0.383
ENSG00000259848	AC097374.1	chr2	-	94930785	94930860	94930018	94930173	94932932	94932991	48548	8,10	0,0	10,5	2,3	174	99	0.000448997	0.0456335	1.0,1.0	0.74,0.487	0.387
ENSG00000102362	SYTL4	chrX	-	100704810	100704886	100703092	100703185	100732003	100732123	14868	8,1	0,0	4,10	1,5	175	99	1.72006e-05	0.0043978	1.0,1.0	0.694,0.531	0.387
ENSG00000224184	MIR3681HG	chr2	+	12397521	12398370	12277765	12277873	12558205	12558444	79596	15,17	0,0	46,41	2,4	948	99	1.28766e-05	0.00349888	1.0,1.0	0.706,0.517	0.389
ENSG00000072756	TRNT1	chr3	+	3127945	3128018	3126979	3127289	3129013	3129188	33739	4,3	0,0	5,6	2,2	172	99	0.000835607	0.0680025	1.0,1.0	0.59,0.633	0.389
ENSG00000163072	NOSTRIN	chr2	+	168856689	168856778	168851278	168851404	168860794	168860909	56880	4,6	0,1	8,5	4,3	188	99	0.000787569	0.066166	1.0,0.76	0.513,0.467	0.39
ENSG00000158006	PAFAH2	chr1	-	25990726	25990863	25984459	25984528	25998024	25998056	24125	16,6	0,0	11,27	5,4	236	99	1.58581e-07	0.00012157	1.0,1.0	0.48,0.739	0.391
ENSG00000101966	XIAP	chrX	+	123860166	123860293	123859723	123859905	123885630	123885711	79881	3,9	0,0	17,17	10,2	226	99	1.31932e-06	0.000590891	1.0,1.0	0.427,0.788	0.392
ENSG00000167619	TMEM145	chr19	+	42317708	42317881	42316869	42316963	42320316	42320437	54253	10,21	0,0	17,24	7,3	272	99	3.93381e-07	0.000245643	1.0,1.0	0.469,0.744	0.393
ENSG00000282995	FRG1EP	chr20	-	29490006	29490064	29488098	29488213	29490846	29490972	88224	5,1	0,0	3,6	1,3	157	99	0.00120952	0.087015	1.0,1.0	0.654,0.558	0.394
ENSG00000224184	MIR3681HG	chr2	+	12340217	12340301	12277765	12277873	12558205	12558444	79590	9,2	0,0	12,6	2,4	183	99	5.79423e-05	0.0107511	1.0,1.0	0.764,0.448	0.394
ENSG00000147689	FAM83A	chr8	+	123179653	123179871	123179097	123179137	123180131	123180229	84200	22,25	0,1	43,42	11,11	317	99	5.59896e-06	0.00179117	1.0,0.886	0.55,0.544	0.396
ENSG00000188185	LINC00265	chr7	+	39788481	39788604	39782734	39782799	39789353	39789425	61102	17,17	0,0	24,17	7,5	222	99	1.17276e-06	0.000544009	1.0,1.0	0.605,0.603	0.396
ENSG00000245060	LINC00847	chr5	+	180832672	180832860	180831023	180831229	180834311	180835002	59293	6,6	0,1	16,22	12,6	287	99	0.000831535	0.0679128	1.0,0.674	0.315,0.558	0.4
ENSG00000273136	NBPF26	chr1	+	120822103	120822267	120818122	120818174	120823308	120823360	6992	4,7	0,0	10,9	1,5	263	99	4.11437e-05	0.00842888	1.0,1.0	0.79,0.404	0.403
ENSG00000103121	CMC2	chr16	-	80991753	80991957	80981805	80981877	80996922	80997020	72568	10,10	0,0	11,28	3,5	303	99	3.65039e-06	0.00131702	1.0,1.0	0.545,0.647	0.404
ENSG00000070770	CSNK2A2	chr16	-	58174450	58174510	58167684	58167795	58196732	58196844	79266	1,1	0,0	9,5	4,2	159	99	6.99423e-05	0.0122431	1.0,1.0	0.583,0.609	0.404
ENSG00000140743	CDR2	chr16	-	22422160	22422214	22364901	22365014	22429795	22429948	72085	2,1	0,0	9,3	1,4	153	99	0.00132183	0.0923032	1.0,1.0	0.853,0.327	0.41
ENSG00000196074	SYCP2	chr20	-	59877384	59877555	59875270	59875469	59878007	59878045	56247	7,4	0,0	8,10	1,5	270	99	1.62497e-05	0.00421598	1.0,1.0	0.746,0.423	0.415
ENSG00000138942	RNF185	chr22	+	31196935	31197157	31192683	31192702	31201497	31201615	17568	7,7	0,0	14,12	4,2	321	99	9.00235e-06	0.00259836	1.0,1.0	0.519,0.649	0.416
ENSG00000160766	GBAP1	chr1	-	155224876	155225087	155217963	155218049	155227381	155227422	78072	17,10	0,0	11,14	2,4	310	99	9.10718e-06	0.00261698	1.0,1.0	0.637,0.528	0.417
ENSG00000080839	RBL1	chr20	-	37067232	37067297	37066992	37067021	37067985	37068186	39283	15,16	2,0	12,15	7,10	164	99	4.63923e-05	0.00910214	0.819,1.0	0.509,0.475	0.417
ENSG00000121897	LIAS	chr4	+	39465284	39465342	39463524	39463605	39470018	39470164	35295	4,2	0,0	12,8	4,5	157	99	7.03465e-07	0.000377557	1.0,1.0	0.654,0.502	0.422
ENSG00000028310	BRD9	chr5	-	869037	869119	868606	868804	869244	869394	9396	3,6	0,0	12,13	5,5	181	99	1.04385e-05	0.00290942	1.0,1.0	0.568,0.587	0.423
ENSG00000093144	ECHDC1	chr6	-	127331829	127331867	127330808	127331030	127342960	127343346	1534	3,5	1,0	2,5	2,5	137	99	0.000366176	0.0398997	0.684,1.0	0.419,0.419	0.423
ENSG00000121067	SPOP	chr17	-	49668026	49668078	49636758	49636809	49675894	49676016	78995	2,8	0,0	4,4	2,2	151	99	0.000432917	0.0448289	1.0,1.0	0.567,0.567	0.433
ENSG00000172530	BANP	chr16	+	88065266	88065332	88037972	88038011	88072068	88072212	77074	6,19	2,2	8,5	8,9	165	99	0.000553503	0.0525834	0.643,0.851	0.375,0.25	0.434
ENSG00000152556	PFKM	chr12	+	48118481	48118577	48108071	48108194	48122766	48122841	45014	8,2	0,0	13,18	7,5	195	99	7.81975e-07	0.000416254	1.0,1.0	0.485,0.646	0.434
ENSG00000237978	KCNMB2-AS1	chr3	-	178757079	178757133	178749045	178749236	178801792	178801936	78481	4,2	0,0	6,2	3,1	153	99	0.000490121	0.0482265	1.0,1.0	0.564,0.564	0.436
ENSG00000257489	AC010203.1	chr12	-	100198843	100198972	100180552	100180716	100199519	100199783	18313	5,5	0,0	7,5	2,2	228	99	0.0005685	0.0535066	1.0,1.0	0.603,0.521	0.438
ENSG00000003436	TFPI	chr2	-	187544503	187544637	187520541	187520613	187554199	187554461	23267	1,4	0,0	14,10	3,5	233	99	1.04715e-07	8.83166e-05	1.0,1.0	0.665,0.459	0.438
ENSG00000154582	ELOC	chr8	-	73970578	73970634	73964486	73964625	73971869	73971908	2294	3,3	0,1	2,2	2,2	155	99	0.000825368	0.0677507	1.0,0.657	0.39,0.39	0.439
ENSG00000229140	CCDC26	chr8	-	129267779	129267863	129223220	129223369	129370306	129370377	71761	2,3	3,1	0,0	2,1	183	99	0.00142649	0.0971059	0.265,0.619	0.0,0.0	0.442
ENSG00000137210	TMEM14B	chr6	+	10827696	10827824	10755141	10755232	10829006	10829186	89606	1,3	0,0	14,9	5,3	227	99	1.86401e-05	0.00467383	1.0,1.0	0.55,0.567	0.442
ENSG00000261740	BOLA2-SMG1P6	chr16	-	29452108	29454113	29446801	29446922	29454190	29454356	82145	43,41	0,0	79,88	2,5	2104	99	1.91889e-07	0.000140018	1.0,1.0	0.65,0.453	0.449
ENSG00000162819	BROX	chr1	+	222715144	222715269	222712563	222712942	222718924	222719031	67208	2,6	0,0	9,7	2,4	224	99	8.12668e-06	0.00239892	1.0,1.0	0.665,0.436	0.45
ENSG00000154582	ELOC	chr8	-	73969559	73969673	73955910	73956054	73972041	73972186	2281	4,6	0,1	5,1	1,3	213	99	0.00120354	0.0870121	1.0,0.736	0.699,0.134	0.452
ENSG00000031823	RANBP3	chr19	-	5941620	5941707	5927967	5928087	5978060	5978079	56494	2,4	0,0	4,5	2,2	186	99	0.000356016	0.0391208	1.0,1.0	0.516,0.571	0.457
ENSG00000139644	TMBIM6	chr12	+	49741956	49742115	49741548	49741611	49749617	49749856	71414	2,12	0,1	12,4	2,6	258	99	0.000692854	0.0612181	1.0,0.822	0.697,0.204	0.461
ENSG00000205639	MFSD2B	chr2	+	24013284	24013410	24010080	24010192	24024094	24024271	89066	13,12	1,1	10,12	6,10	225	99	0.000222259	0.0284132	0.851,0.841	0.423,0.346	0.462
ENSG00000205853	RFPL3S	chr22	-	32362971	32363058	32359885	32360839	32367689	32367714	10739	2,2	0,0	9,8	3,5	186	99	3.49976e-07	0.000225031	1.0,1.0	0.615,0.46	0.463
ENSG00000177565	TBL1XR1	chr3	-	177079826	177079945	177053772	177053918	177197120	177197184	32061	3,1	0,0	13,2	4,1	218	99	0.000130989	0.0192895	1.0,1.0	0.596,0.476	0.464
ENSG00000268362	AC092279.1	chr19	+	24065462	24065648	24049404	24049548	24067051	24067609	55328	3,4	0,0	4,11	1,4	285	99	3.41649e-05	0.0072489	1.0,1.0	0.581,0.489	0.465
ENSG00000204301	NOTCH4	chr6	-	32196323	32196421	32194842	32196150	32196924	32197072	62016	3,7	0,0	7,3	4,1	197	99	4.25443e-05	0.00860719	1.0,1.0	0.468,0.601	0.466
ENSG00000100325	ASCC2	chr22	-	29834441	29834550	29825621	29825780	29838177	29838274	53987	6,5	0,0	12,4	2,4	208	99	2.57698e-05	0.00587207	1.0,1.0	0.741,0.322	0.469
ENSG00000114030	KPNA1	chr3	-	122459438	122459681	122457725	122457848	122459773	122460657	6487	12,23	0,0	36,21	10,5	342	99	5.10034e-07	0.000301115	1.0,1.0	0.51,0.549	0.47
ENSG00000181135	ZNF707	chr8	+	143684755	143685067	143684486	143684542	143689203	143689301	86060	12,11	0,0	20,18	8,2	411	99	5.84921e-08	5.56758e-05	1.0,1.0	0.376,0.684	0.47
ENSG00000183765	CHEK2	chr22	-	28724885	28724923	28711908	28712017	28725242	28725367	52757	3,4	1,0	8,0	2,3	137	99	0.0012903	0.0910727	0.684,1.0	0.743,0.0	0.471
ENSG00000181381	DDX60L	chr4	-	168530560	168530702	168492665	168492885	168536547	168536596	6495	3,2	0,0	8,6	1,6	241	99	7.68224e-06	0.00232047	1.0,1.0	0.767,0.291	0.471
ENSG00000161813	LARP4	chr12	+	50416345	50416434	50412404	50412453	50427764	50427909	47321	1,1	0,0	6,3	4,1	188	99	4.29596e-05	0.00866424	1.0,1.0	0.441,0.612	0.474
ENSG00000109184	DCUN1D4	chr4	+	51908919	51908975	51905188	51905320	51911069	51911174	29567	1,4	0,0	3,3	3,1	155	99	0.00105683	0.0801199	1.0,1.0	0.39,0.657	0.476
ENSG00000197136	PCNX3	chr11	+	65619536	65619660	65617939	65619067	65620338	65620429	23324	8,8	0,1	11,9	5,8	223	99	7.69566e-05	0.0131174	1.0,0.78	0.494,0.333	0.477
ENSG00000113360	DROSHA	chr5	-	31467458	31467612	31467141	31467166	31467938	31468063	77617	2,6	0,0	11,20	7,4	253	99	1.54349e-07	0.000121502	1.0,1.0	0.381,0.662	0.478
ENSG00000168038	ULK4	chr3	-	41915976	41916052	41912806	41912899	41918456	41918540	72683	3,2	0,0	3,5	2,2	175	99	0.000744576	0.0639607	1.0,1.0	0.459,0.586	0.478
ENSG00000139187	KLRG1	chr12	+	8992205	8992310	8950043	8950236	9008974	9009075	11954	1,4	0,0	10,6	4,3	204	99	1.38805e-05	0.00372491	1.0,1.0	0.548,0.493	0.48
ENSG00000010318	PHF7	chr3	+	52422759	52422881	52421647	52421754	52423090	52423640	46323	3,12	0,0	12,5	2,5	221	99	2.60771e-06	0.00102636	1.0,1.0	0.729,0.309	0.481
ENSG00000141564	RPTOR	chr17	+	80883780	80883972	80880414	80880489	80891719	80891837	44946	10,19	0,0	27,36	9,11	291	99	4.99309e-07	0.000300242	1.0,1.0	0.505,0.527	0.484
ENSG00000068745	IP6K2	chr3	-	48708119	48708237	48695089	48695418	48711366	48711459	67195	2,3	0,0	10,13	4,6	217	99	7.91869e-06	0.00235897	1.0,1.0	0.533,0.497	0.485
ENSG00000100983	GSS	chr20	-	34942487	34942585	34936942	34937023	34942930	34942980	79160	5,6	0,0	7,5	1,8	197	99	5.02322e-06	0.00166827	1.0,1.0	0.779,0.239	0.491
ENSG00000111860	CEP85L	chr6	-	118664410	118664521	118652699	118652808	118710035	118710068	68073	17,11	1,3	9,9	11,13	210	99	0.000134575	0.0196838	0.889,0.634	0.278,0.246	0.5
ENSG00000247498	GPRC5D-AS1	chr12	+	12966758	12966857	12927726	12927803	12979430	12979622	53887	2,6	0,0	7,9	8,2	198	99	1.50942e-07	0.000121018	1.0,1.0	0.304,0.692	0.502
ENSG00000104859	CLASRP	chr19	+	45052790	45052892	45039520	45040311	45056449	45056534	31243	2,3	0,0	8,5	2,5	201	99	5.66661e-07	0.000325664	1.0,1.0	0.663,0.33	0.503
ENSG00000185033	SEMA4B	chr15	+	90201457	90201735	90184962	90185081	90217438	90217554	71724	15,18	1,0	23,12	6,8	377	99	1.93766e-05	0.00481761	0.798,1.0	0.502,0.283	0.507
ENSG00000241258	CRCP	chr7	+	66130743	66130842	66114603	66114970	66145442	66145500	27994	2,7	0,1	7,3	7,2	198	99	0.000303482	0.0347141	1.0,0.778	0.333,0.429	0.508
ENSG00000160345	C9orf116	chr9	-	135499708	135499915	135498584	135498663	135501628	135501734	56435	6,5	1,0	1,3	2,1	306	99	0.000540938	0.0518136	0.66,1.0	0.139,0.493	0.514
ENSG00000141380	SS18	chr18	-	26084051	26084175	26082362	26082528	26087500	26087577	5211	11,8	0,0	26,12	7,10	223	99	6.39102e-07	0.00035474	1.0,1.0	0.622,0.348	0.515
ENSG00000074054	CLASP1	chr2	-	121409023	121409047	121407470	121407712	121410865	121410969	49051	5,4	1,0	2,4	5,3	123	99	0.000129018	0.0190681	0.801,1.0	0.244,0.518	0.52
ENSG00000231770	TMEM44-AS1	chr3	+	194589473	194589626	194589020	194589142	194589854	194590249	33047	3,3	1,0	5,4	7,4	252	99	0.00123408	0.0881093	0.541,1.0	0.219,0.282	0.52
ENSG00000150433	TMEM218	chr11	-	125110643	125110746	125101200	125101303	125111538	125111579	46213	3,2	0,0	7,4	4,2	202	99	9.16132e-06	0.00262095	1.0,1.0	0.462,0.495	0.521
ENSG00000113558	SKP1	chr5	-	134173700	134173766	134170950	134171038	134173925	134174022	71438	2,2	0,0	4,5	3,3	165	99	1.15539e-05	0.00317938	1.0,1.0	0.444,0.5	0.528
ENSG00000152683	SLC30A6	chr2	+	32206885	32206933	32197706	32197826	32220212	32224112	78569	5,5	0,0	2,4	5,1	147	99	3.09638e-05	0.00672526	1.0,1.0	0.212,0.729	0.53
ENSG00000189223	PAX8-AS1	chr2	+	113250766	113250906	113236268	113236622	113255389	113255534	80555	4,3	0,0	9,6	3,4	239	99	1.06176e-07	8.84012e-05	1.0,1.0	0.554,0.383	0.531
ENSG00000234948	LINC01524	chr20	+	52340489	52340652	52234768	52234932	52442499	52442638	15405	1,2	0,0	3,8	5,1	262	99	2.06338e-05	0.00496297	1.0,1.0	0.185,0.751	0.532
ENSG00000047648	ARHGAP6	chrX	-	11148629	11148719	11142232	11144245	11156528	11156626	66692	1,4	0,0	10,5	6,3	189	99	4.34103e-06	0.00151567	1.0,1.0	0.466,0.466	0.534
ENSG00000110841	PPFIBP1	chr12	+	27677063	27677096	27676427	27676599	27679488	27679639	46741	2,1	0,1	3,0	4,3	132	99	0.00146553	0.0984223	1.0,0.429	0.36,0.0	0.534
ENSG00000135127	BICDL1	chr12	+	120074442	120074586	120072510	120072729	120080886	120081017	79648	1,4	0,1	3,0	1,2	243	99	0.00122891	0.0878938	1.0,0.62	0.55,0.0	0.535
ENSG00000235257	ITGA9-AS1	chr3	-	37851423	37851492	37834678	37834767	37861700	37861732	82555	2,6	1,0	6,0	4,1	168	99	0.00125804	0.0891919	0.541,1.0	0.469,0.0	0.536
ENSG00000224322	AC004009.1	chr7	+	27384402	27384636	27361627	27361692	27404204	27404325	47149	11,10	1,1	7,6	8,6	333	99	0.000181287	0.0243751	0.766,0.748	0.206,0.229	0.539
ENSG00000197857	ZNF44	chr19	-	12293231	12293375	12291027	12291250	12294691	12294794	24559	2,3	0,0	8,4	2,4	243	99	1.83053e-06	0.000782095	1.0,1.0	0.62,0.289	0.545
ENSG00000234062	AL390879.1	chrX	+	136997288	136997400	136994846	136994995	137002324	137002493	30640	3,2	1,0	0,2	1,1	211	99	0.000536685	0.0516347	0.585,1.0	0.0,0.484	0.55
ENSG00000100802	C14orf93	chr14	-	23000958	23001031	22998704	22999156	23010100	23010143	14508	2,5	0,0	6,10	5,6	172	99	9.52887e-07	0.000476018	1.0,1.0	0.409,0.49	0.55
ENSG00000148814	LRRC27	chr10	+	132348962	132349057	132347983	132348356	132351606	132351753	46314	5,2	1,1	1,1	9,7	194	99	8.12972e-05	0.0136723	0.718,0.505	0.054,0.068	0.55
ENSG00000088986	DYNLL1	chr12	+	120495283	120495437	120493802	120493925	120496415	120496547	40438	6,4	0,0	7,6	5,2	253	99	3.77607e-08	3.95525e-05	1.0,1.0	0.354,0.54	0.553
ENSG00000134470	IL15RA	chr10	-	5968775	5968928	5966144	5966339	5977404	5977611	35524	2,6	0,0	4,9	3,3	252	99	1.14253e-06	0.000533798	1.0,1.0	0.344,0.541	0.557
ENSG00000234684	SDCBP2-AS1	chr20	+	1359698	1359820	1325418	1325529	1373077	1373178	44726	2,4	0,0	5,8	7,2	221	99	7.87717e-09	1.11186e-05	1.0,1.0	0.242,0.642	0.558
ENSG00000008394	MGST1	chr12	+	16367324	16367465	16357604	16357699	16383506	16383604	28635	5,4	0,0	9,1	1,4	240	99	0.000150984	0.0212694	1.0,1.0	0.788,0.093	0.559
ENSG00000178234	GALNT11	chr7	+	152079286	152079408	152027596	152027718	152094189	152094522	69663	8,9	2,0	6,9	8,11	221	99	0.000293225	0.0339707	0.642,1.0	0.251,0.268	0.561
ENSG00000228918	LINC01344	chr1	-	182258009	182258082	182167085	182167224	182313489	182313785	12034	3,1	0,0	3,7	4,3	172	99	1.65287e-07	0.000124814	1.0,1.0	0.302,0.573	0.563
ENSG00000205571	SMN2	chr5	+	70071281	70071390	70070640	70070751	70077018	70077596	63998	3,2	0,2	1,0	2,3	208	99	0.00125593	0.0891395	1.0,0.322	0.192,0.0	0.565
ENSG00000161010	MRNIP	chr5	-	179851242	179851424	179847977	179848066	179853196	179853276	21063	6,6	0,0	11,20	10,5	281	99	2.51176e-07	0.000175397	1.0,1.0	0.279,0.585	0.568
ENSG00000238105	GOLGA2P5	chr12	-	100157348	100157445	100157164	100157256	100157527	100157739	12457	2,1	0,0	3,3	2,2	196	99	8.98167e-05	0.0145822	1.0,1.0	0.431,0.431	0.569
ENSG00000163157	TMOD4	chr1	-	151170518	151170663	151169986	151170103	151170919	151171059	18715	4,10	1,0	2,5	5,4	244	99	4.06123e-05	0.00837924	0.619,1.0	0.14,0.337	0.571
ENSG00000126653	NSRP1	chr17	+	30156539	30156662	30118079	30118173	30163066	30163162	91673	5,1	1,0	7,3	4,11	222	99	0.000719141	0.0626878	0.69,1.0	0.438,0.108	0.572
ENSG00000015676	NUDCD3	chr7	-	44425899	44426279	44413190	44413283	44427570	44427703	72624	3,9	0,0	16,8	5,2	479	99	1.89955e-06	0.000801045	1.0,1.0	0.398,0.453	0.575
ENSG00000148498	PARD3	chr10	-	34284134	34284245	34269656	34269899	34317106	34317338	35360	8,7	0,0	1,8	2,2	210	99	0.000843817	0.0684989	1.0,1.0	0.191,0.653	0.578
ENSG00000119048	UBE2B	chr5	+	134380718	134380808	134374382	134374463	134390224	134390321	73843	1,5	0,1	7,2	4,11	189	99	0.000453185	0.045771	1.0,0.724	0.478,0.087	0.58
ENSG00000189430	NCR1	chr19	+	54906522	54906807	54906154	54906334	54909244	54909347	78961	7,5	0,0	4,16	3,3	384	99	1.10071e-06	0.000529498	1.0,1.0	0.256,0.579	0.583
ENSG00000182093	GET1	chr21	+	39407792	39407917	39405913	39406731	39408605	39408677	77511	8,3	0,0	6,3	2,4	224	99	6.8753e-07	0.000375206	1.0,1.0	0.57,0.249	0.591
ENSG00000168385	SEPTIN2	chr2	+	241317498	241317599	241315943	241315982	241324408	241324662	40127	6,3	0,0	10,15	12,7	200	99	1.36952e-06	0.00060503	1.0,1.0	0.292,0.515	0.597
ENSG00000186918	ZNF395	chr8	-	28375261	28375382	28360884	28361182	28385079	28385397	15292	5,4	0,0	3,3	2,2	220	99	4.41242e-05	0.00884418	1.0,1.0	0.403,0.403	0.597
ENSG00000251602	AL928654.1	chr14	-	105418681	105418816	105418017	105418312	105418938	105419071	77077	5,2	0,0	12,1	3,2	234	99	9.64345e-05	0.0154252	1.0,1.0	0.629,0.175	0.598
ENSG00000268362	AC092279.1	chr19	+	24057930	24058106	24049404	24049548	24067051	24067609	55319	1,6	0,0	11,0	1,4	275	99	6.96626e-05	0.0122271	1.0,1.0	0.798,0.0	0.601
ENSG00000185267	CDNF	chr10	-	14834216	14834333	14828144	14828272	14836250	14836294	90992	1,1	0,0	4,2	4,1	216	99	3.26413e-06	0.00121131	1.0,1.0	0.314,0.478	0.604
ENSG00000234948	LINC01524	chr20	+	52304954	52304991	52234768	52234932	52442499	52442638	15394	3,2	0,0	4,1	5,1	136	99	3.40083e-06	0.00124077	1.0,1.0	0.368,0.421	0.606
ENSG00000168385	SEPTIN2	chr2	+	241324215	241324241	241315860	241315982	241324408	241324662	40141	3,6	0,0	6,9	12,7	125	99	3.11367e-07	0.000206334	1.0,1.0	0.284,0.505	0.606
ENSG00000105662	CRTC1	chr19	+	18768484	18768793	18765403	18765528	18775640	18775821	38455	7,2	0,0	14,0	1,2	408	99	0.000979341	0.0762594	1.0,1.0	0.773,0.0	0.613
ENSG00000241837	ATP5PO	chr21	-	33906448	33906500	33903934	33904021	33906725	33906821	57087	2,1	0,0	4,2	3,3	151	99	6.13172e-07	0.000343281	1.0,1.0	0.466,0.304	0.615
ENSG00000260565	ERVK13-1	chr16	-	2670809	2670974	2669410	2669561	2671344	2672273	73817	5,2	0,1	1,1	3,5	264	99	7.34917e-05	0.0127588	1.0,0.429	0.111,0.07	0.624
ENSG00000163935	SFMBT1	chr3	-	53018085	53018228	52969100	52969258	53043135	53043254	37588	2,4	0,0	9,3	3,5	242	99	2.91446e-09	5.25753e-06	1.0,1.0	0.551,0.197	0.626
ENSG00000178162	FAR2P2	chr2	-	130425913	130426038	130425090	130425158	130427703	130427742	49073	1,1	0,0	3,5	5,2	224	99	1.38373e-08	1.69551e-05	1.0,1.0	0.21,0.525	0.633
ENSG00000104626	ERI1	chr8	+	9096742	9096860	9088459	9088569	9099858	9100099	69442	4,1	1,0	5,4	20,5	217	99	0.000519312	0.050261	0.646,1.0	0.102,0.267	0.638
ENSG00000083807	SLC27A5	chr19	-	58481063	58481187	58479511	58480805	58483531	58483646	24802	2,1	1,0	1,0	2,2	223	99	0.00141901	0.0969013	0.47,1.0	0.182,0.0	0.644
ENSG00000157045	NTAN1	chr16	-	15048077	15048099	15047854	15047920	15055890	15056039	66064	2,1	0,0	0,3	4,1	121	99	8.73493e-05	0.0144083	1.0,1.0	0.0,0.711	0.645
ENSG00000115525	ST3GAL5	chr2	-	85851263	85851703	85847860	85848381	85861180	85861292	83511	11,6	0,0	9,6	3,2	539	99	2.482e-06	0.000988871	1.0,1.0	0.355,0.355	0.645
ENSG00000243335	KCTD7	chr7	+	66639127	66639228	66638855	66638929	66643534	66643611	30676	2,1	0,0	4,3	2,6	200	99	5.8888e-10	1.71038e-06	1.0,1.0	0.497,0.198	0.652
ENSG00000124615	MOCS1	chr6	-	39927183	39927455	39925716	39925845	39934294	39934459	31087	3,4	0,0	6,2	3,1	371	99	1.62947e-05	0.00421598	1.0,1.0	0.348,0.348	0.652
ENSG00000166743	ACSM1	chr16	-	20636738	20636840	20627188	20627316	20637370	20637451	55518	5,4	0,0	4,2	2,4	201	99	1.59118e-07	0.00012157	1.0,1.0	0.496,0.198	0.653
ENSG00000160172	FAM86C2P	chr11	-	67799373	67799475	67793195	67793293	67803001	67803064	27827	7,6	0,0	7,6	3,16	201	99	8.08813e-09	1.11186e-05	1.0,1.0	0.535,0.156	0.654
ENSG00000196295	GARS1-DT	chr7	-	30551317	30551395	30550567	30550781	30563730	30563998	11858	3,5	0,1	1,3	4,4	177	99	4.18244e-05	0.00851461	1.0,0.737	0.123,0.296	0.659
ENSG00000162981	LRATD1	chr2	+	14641971	14642080	14635495	14635644	14649315	14649453	71502	2,1	0,0	1,2	2,1	208	99	0.0011509	0.0843738	1.0,1.0	0.192,0.488	0.66
ENSG00000104177	MYEF2	chr15	-	48151099	48151171	48149162	48149371	48151472	48151571	18286	2,1	0,0	2,1	1,4	171	99	2.16707e-06	0.000878339	1.0,1.0	0.537,0.126	0.668
ENSG00000127054	INTS11	chr1	-	1323180	1323287	1321907	1321980	1324580	1324625	54048	3,2	0,0	3,2	2,3	206	99	1.60077e-06	0.000697698	1.0,1.0	0.419,0.243	0.669
ENSG00000076928	ARHGEF1	chr19	+	41897314	41897326	41896376	41896482	41897945	41898113	92618	3,2	0,0	2,1	2,4	111	99	3.30033e-07	0.00021433	1.0,1.0	0.471,0.182	0.673
ENSG00000254469	AP002495.1	chr11	-	71925932	71926104	71918884	71919026	71928364	71928403	19318	4,5	0,0	4,2	5,1	271	99	1.63737e-08	1.96915e-05	1.0,1.0	0.226,0.422	0.676
ENSG00000204599	TRIM39	chr6	+	30327646	30327696	30326956	30326995	30328888	30329041	43932	1,1	0,0	5,7	10,7	149	99	2.6636e-06	0.00103581	1.0,1.0	0.249,0.399	0.676
ENSG00000130734	ATG4D	chr19	+	10547188	10547253	10544956	10545130	10551896	10551975	14444	4,3	0,0	6,1	4,3	164	99	4.02917e-08	4.15337e-05	1.0,1.0	0.475,0.168	0.678
ENSG00000166925	TSC22D4	chr7	-	100463962	100464029	100463358	100463686	100467551	100467600	34222	2,1	0,0	0,9	2,3	166	99	0.000119843	0.0181419	1.0,1.0	0.0,0.641	0.679
ENSG00000144815	NXPE3	chr3	+	101779733	101779900	101779201	101779324	101782109	101782290	15511	1,2	0,0	1,7	2,3	266	99	4.08875e-06	0.00144311	1.0,1.0	0.157,0.465	0.689
ENSG00000169180	XPO6	chr16	-	28152929	28152964	28152658	28152785	28155701	28155771	36451	1,2	0,0	2,0	1,2	134	99	0.000726954	0.0630369	1.0,1.0	0.596,0.0	0.702
ENSG00000160172	FAM86C2P	chr11	-	67796683	67796833	67791766	67793293	67803001	67803064	27826	3,1	0,0	6,7	3,16	249	99	9.73517e-08	8.31871e-05	1.0,1.0	0.443,0.148	0.705
ENSG00000263551	AP000829.1	chr18	+	1162814	1162853	1159178	1159398	1183829	1183959	24030	3,1	0,0	2,0	1,2	138	99	0.000658622	0.0589681	1.0,1.0	0.589,0.0	0.706
ENSG00000171490	RSL1D1	chr16	-	11849257	11849385	11847667	11847806	11851407	11851508	12495	1,5	0,0	4,5	6,4	227	99	1.04359e-09	2.51011e-06	1.0,1.0	0.225,0.353	0.711
ENSG00000131095	GFAP	chr17	-	44910091	44910260	44907316	44908149	44910614	44910658	39715	2,2	0,1	0,0	2,2	268	99	0.000186237	0.0248861	1.0,0.425	0.0,0.0	0.713
ENSG00000173402	DAG1	chr3	+	49476848	49476905	49470964	49471049	49487227	49487415	63217	1,1	0,0	0,4	2,2	156	99	0.000132153	0.0194169	1.0,1.0	0.0,0.559	0.72
ENSG00000163625	WDFY3	chr4	-	84726860	84726911	84724425	84724594	84733381	84733609	59106	2,1	0,0	3,7	11,7	150	99	4.09497e-07	0.000253272	1.0,1.0	0.153,0.398	0.724
ENSG00000123297	TSFM	chr12	+	57802173	57802264	57792985	57793073	57802554	57802774	26902	1,4	0,0	2,3	4,3	190	99	1.26638e-09	2.74137e-06	1.0,1.0	0.207,0.343	0.725
ENSG00000165490	DDIAS	chr11	+	82913654	82913746	82913286	82913386	82913956	82914031	76804	1,2	0,0	0,7	2,3	191	99	1.82573e-05	0.00459561	1.0,1.0	0.0,0.547	0.726
ENSG00000121417	ZNF211	chr19	+	57633712	57633905	57633215	57633436	57634628	57634755	26183	3,5	0,0	6,3	5,3	292	99	1.87898e-07	0.000138665	1.0,1.0	0.289,0.253	0.729
ENSG00000144134	RABL2A	chr2	+	113635050	113635130	113634152	113634232	113641352	113641450	32619	1,1	0,0	4,3	7,4	179	99	8.82208e-07	0.000454701	1.0,1.0	0.24,0.293	0.734
ENSG00000267303	AC011511.4	chr19	-	10316017	10316097	10315704	10315759	10316234	10317600	58152	1,1	0,0	1,1	1,3	179	99	2.34625e-06	0.000940556	1.0,1.0	0.356,0.156	0.744
ENSG00000116396	KCNC4	chr1	+	110232220	110232597	110225974	110226178	110232910	110234044	34276	5,4	0,0	7,1	3,1	476	99	7.86866e-06	0.00235487	1.0,1.0	0.327,0.172	0.75
ENSG00000240405	SAMMSON	chr3	+	70065245	70065318	70013519	70013672	70071475	70071565	39611	2,1	0,0	2,2	3,4	172	99	5.06397e-07	0.000301115	1.0,1.0	0.277,0.223	0.75
ENSG00000239779	WBP1	chr2	+	74458996	74459098	74458399	74458671	74459437	74459745	49439	3,1	0,0	0,2	2,1	201	99	0.000103045	0.0162426	1.0,1.0	0.0,0.496	0.752
ENSG00000233723	LINC01122	chr2	+	58915679	58915902	58850429	58850606	58924544	58924626	71960	2,2	0,0	1,3	1,3	322	99	2.65855e-06	0.00103581	1.0,1.0	0.235,0.235	0.765
ENSG00000133794	ARNTL	chr11	+	13355225	13355296	13354300	13354448	13356738	13356777	21264	2,4	1,0	0,0	3,6	170	99	9.61637e-08	8.31871e-05	0.538,1.0	0.0,0.0	0.769
ENSG00000132570	PCBD2	chr5	+	134975137	134975324	134969938	134970092	134996272	134996512	75965	1,3	0,0	1,3	3,2	286	99	6.96517e-08	6.28239e-05	1.0,1.0	0.103,0.342	0.777
ENSG00000196338	NLGN3	chrX	+	71148845	71148905	71147549	71148206	71153476	71153536	48469	3,2	0,1	0,0	1,1	159	99	6.10632e-07	0.000343281	1.0,0.555	0.0,0.0	0.778
ENSG00000132676	DAP3	chr1	+	155729041	155729122	155725926	155726019	155731355	155731411	59952	1,1	0,0	2,2	7,3	180	99	9.95126e-11	3.8015e-07	1.0,1.0	0.136,0.268	0.798
ENSG00000176261	ZBTB8OS	chr1	-	32631826	32631879	32620819	32621948	32650428	32650550	86389	1,1	0,0	1,0	1,4	152	99	5.03716e-09	8.60851e-06	1.0,1.0	0.394,0.0	0.803
ENSG00000119242	CCDC92	chr12	-	123956283	123956444	123944269	123944364	123972528	123972616	13266	2,2	0,0	3,2	3,7	260	99	2.05325e-12	1.66677e-08	1.0,1.0	0.276,0.098	0.813
ENSG00000186998	EMID1	chr22	+	29255270	29255361	29243444	29243489	29258816	29259597	85962	2,2	0,0	0,2	2,2	190	99	1.49436e-06	0.00065572	1.0,1.0	0.0,0.343	0.829
ENSG00000050393	MCUR1	chr6	-	13803729	13804315	13801287	13801389	13806924	13807044	29718	2,2	0,0	5,4	4,3	685	99	3.49573e-08	3.72164e-05	1.0,1.0	0.153,0.162	0.843
ENSG00000119782	FKBP1B	chr2	+	24054472	24054540	24054103	24054192	24060813	24060926	41014	1,2	0,0	1,3	13,6	167	99	2.96629e-08	3.21061e-05	1.0,1.0	0.044,0.229	0.863
ENSG00000091140	DLD	chr7	+	107904662	107904746	107903477	107903547	107904862	107905058	31998	1,4	0,0	2,0	5,2	183	99	5.64537e-12	3.33293e-08	1.0,1.0	0.178,0.0	0.911
ENSG00000230590	FTX	chrX	-	74284742	74284944	74281701	74281848	74292426	74292594	86999	5,4	0,0	1,0	2,5	301	99	2.19824e-14	3.56896e-10	1.0,1.0	0.141,0.0	0.929
ENSG00000175029	CTBP2	chr10	-	125133511	125133612	125110996	125111093	125158634	125158716	45279	2,2	0,0	0,1	7,8	200	99	8.11506e-10	2.02695e-06	1.0,1.0	0.0,0.058	0.971
ENSG00000248664	AC010273.2	chr5	-	69128033	69128108	69115234	69115402	69130342	69130545	18920	5,1	0,0	0,0	2,1	174	99	1.22456e-09	2.74137e-06	1.0,1.0	0.0,0.0	1
ENSG00000123684	LPGAT1	chr1	-	211830182	211830330	211829178	211829319	211830572	211830722	87806	3,2	0,0	0,0	2,1	247	99	1.66333e-09	3.37563e-06	1.0,1.0	0.0,0.0	1
ENSG00000196923	PDLIM7	chr5	-	177491403	177491420	177491009	177491146	177492404	177492435	26524	1,2	0,0	0,0	3,1	116	99	2.68209e-09	4.97658e-06	1.0,1.0	0.0,0.0	1
ENSG00000123415	SMUG1	chr12	-	54172375	54172433	54172024	54172109	54182503	54182623	38365	1,1	0,0	0,0	1,2	157	99	8.21797e-09	1.11186e-05	1.0,1.0	0.0,0.0	1
ENSG00000089123	TASP1	chr20	-	13600542	13600617	13587249	13587370	13616856	13617123	4689	1,2	0,0	0,0	3,3	174	99	1.40092e-09	2.93479e-06	1.0,1.0	0.0,0.0	1
ENSG00000145979	TBC1D7	chr6	-	13294795	13294898	13281428	13281553	13316570	13316708	23279	1,1	0,0	0,0	1,2	202	99	6.11797e-09	9.93284e-06	1.0,1.0	0.0,0.0	1

## Sheet: RI
GeneID	geneSymbol	chr	strand	riExonStart_0base	riExonEnd	upstreamES	upstreamEE	downstreamES	downstreamEE	ID	IJC_SAMPLE_1	SJC_SAMPLE_1	IJC_SAMPLE_2	SJC_SAMPLE_2	IncFormLen	SkipFormLen	PValue	FDR	IncLevel1	IncLevel2	IncLevelDifference
ENSG00000113163	CERT1	chr5	-	75400204	75403058	75400204	75400291	75402971	75403058	3783	10,8	2,3	14,13	0,0	2779	99	5.08035e-09	2.95613e-06	0.151,0.087	1.0,1.0	-0.881
ENSG00000183569	SERHL2	chr22	+	42555663	42556083	42555663	42555705	42556063	42556083	302	3,0	1,2	12,7	0,0	457	99	1.50657e-05	0.00134867	0.394,0.0	1.0,1.0	-0.803
ENSG00000158525	CPA5	chr7	+	130367371	130367990	130367371	130367571	130367905	130367990	4008	0,3	1,1	7,3	0,0	433	99	0.00417446	0.0786725	0.0,0.407	1.0,1.0	-0.796
ENSG00000128284	APOL3	chr22	-	36149045	36149371	36149045	36149142	36149258	36149371	7088	0,0	1,2	2,2	0,1	215	99	5.73091e-05	0.00365443	0.0,0.0	1.0,0.479	-0.74
ENSG00000285533	RELA-DT	chr11	+	65663426	65665543	65663426	65663683	65665420	65665543	3882	6,4	3,1	38,15	1,0	1836	99	1.41699e-05	0.00129336	0.097,0.177	0.672,1.0	-0.699
ENSG00000141738	GRB7	chr17	+	39742565	39743054	39742565	39742716	39742897	39743054	6507	2,0	2,2	4,6	0,2	280	99	0.00110143	0.0332684	0.261,0.0	1.0,0.515	-0.627
ENSG00000164076	CAMKV	chr3	-	49860942	49861300	49860942	49861018	49861179	49861300	1330	2,0	2,1	2,4	1,0	260	99	0.000268555	0.0116016	0.276,0.0	0.432,1.0	-0.578
ENSG00000168067	MAP4K2	chr11	-	64791908	64792422	64791908	64792086	64792363	64792422	6258	0,1	4,0	8,2	0,0	376	99	9.77216e-05	0.00540855	0.0,1.0	1.0,1.0	-0.5
ENSG00000169194	IL13	chr5	+	132658172	132659471	132658172	132658360	132659417	132659471	4338	0,1	1,0	4,2	0,0	1156	99	0.00218582	0.0496341	0.0,1.0	1.0,1.0	-0.5
ENSG00000053524	MCF2L2	chr3	-	183224097	183228366	183224097	183224190	183228296	183228366	2059	4,4	2,0	26,23	0,0	4205	99	0.000454627	0.0173466	0.045,1.0	1.0,1.0	-0.478
ENSG00000082512	TRAF5	chr1	+	211356366	211360779	211356366	211356468	211360701	211360779	3885	10,8	0,2	15,20	0,0	4332	99	0.00470402	0.0852032	1.0,0.084	1.0,1.0	-0.458
ENSG00000157379	DHRS1	chr14	-	24292183	24292784	24292183	24292330	24292651	24292784	6701	28,36	23,30	94,55	10,8	420	99	6.51239e-10	6.06303e-07	0.223,0.22	0.689,0.618	-0.432
ENSG00000179532	DNHD1	chr11	+	6570008	6572027	6570008	6571423	6571635	6572027	2047	4,0	8,3	29,30	15,6	311	99	0.000247523	0.0109735	0.137,0.0	0.381,0.614	-0.429
ENSG00000137802	MAPKBP1	chr15	+	41819245	41819650	41819245	41819379	41819594	41819650	3738	4,5	7,5	17,20	4,3	314	99	0.000419311	0.0162658	0.153,0.24	0.573,0.678	-0.429
ENSG00000157734	SNX22	chr15	+	64152242	64152742	64152242	64152326	64152637	64152742	2065	6,3	2,1	4,8	0,1	410	99	0.00200516	0.0471415	0.42,0.42	1.0,0.659	-0.41
ENSG00000089692	LAG3	chr12	+	6777790	6778455	6777790	6777921	6778243	6778455	5227	2,1	1,1	2,4	1,0	421	99	0.00508214	0.0876199	0.32,0.19	0.32,1.0	-0.405
ENSG00000166747	AP1G1	chr16	-	71807800	71808150	71807800	71807838	71808014	71808150	2586	6,10	3,1	11,6	0,0	275	99	0.00271189	0.0590496	0.419,0.783	1.0,1.0	-0.399
ENSG00000233184	AC093157.1	chr1	+	101080388	101083574	101080388	101080613	101083460	101083574	2310	76,91	4,3	249212	2,1	2946	99	0.00241196	0.0537209	0.39,0.505	0.807,0.877	-0.395
ENSG00000166340	TPP1	chr11	-	6617625	6619267	6617625	6617776	6619195	6619267	2553	81107	2,7	240191	0,0	1518	99	1.37418e-08	6.39679e-06	0.725,0.499	1.0,1.0	-0.388
ENSG00000141503	MINK1	chr17	+	4889646	4890735	4889646	4889763	4890516	4890735	2138	47,64	14,16	282251	12,17	852	99	3.60333e-07	8.63668e-05	0.281,0.317	0.732,0.632	-0.383
ENSG00000012171	SEMA3B	chr3	+	50273912	50274582	50273912	50274057	50274362	50274582	4201	0,5	4,5	26,14	8,4	404	99	0.00119161	0.0348864	0.0,0.197	0.443,0.462	-0.354
ENSG00000099956	SMARCB1	chr22	+	23800943	23803422	23800943	23801135	23803294	23803422	2836	40,53	5,4	201209	4,5	2258	99	0.0027834	0.0602637	0.26,0.367	0.688,0.647	-0.354
ENSG00000127419	TMEM175	chr4	+	948115	948615	948115	948154	948410	948615	2432	23,30	6,2	75,55	0,0	355	99	2.20392e-06	0.000318855	0.517,0.807	1.0,1.0	-0.338
ENSG00000174483	BBS1	chr11	+	66531655	66532219	66531655	66531742	66531950	66532219	2749	1,0	6,6	18,19	14,9	307	99	1.49375e-06	0.000248337	0.051,0.0	0.293,0.405	-0.323
ENSG00000214655	ZSWIM8	chr10	+	73794146	73794639	73794146	73794330	73794555	73794639	7211	29,33	11,10	113,91	9,9	324	99	0.000310325	0.0130141	0.446,0.502	0.793,0.755	-0.3
ENSG00000174951	FUT1	chr19	-	48752489	48753122	48752489	48752725	48752891	48753122	4452	3,0	0,6	4,8	1,0	265	99	0.00310893	0.0646074	1.0,0.0	0.599,1.0	-0.299
ENSG00000133226	SRRM1	chr1	+	24646666	24649029	24646666	24646789	24648858	24649029	6667	7991074	156159	38782954	153144	2168	99	0	0	0.19,0.236	0.536,0.484	-0.297
ENSG00000247708	STX18-AS1	chr4	+	4648976	4649542	4648976	4649109	4649372	4649542	4956	0,1	4,1	3,2	1,1	362	99	0.00482816	0.0871128	0.0,0.215	0.451,0.354	-0.295
ENSG00000163930	BAP1	chr3	-	52402778	52403298	52402778	52402940	52403137	52403298	5681	22,17	11,7	51,58	9,7	296	99	0.0049127	0.0875478	0.401,0.448	0.655,0.735	-0.271
ENSG00000159199	ATP5MC1	chr17	+	48893408	48895334	48893408	48893456	48895155	48895334	6979	277215	6,6	662635	0,3	1798	99	1.84793e-05	0.00159298	0.718,0.664	1.0,0.921	-0.269
ENSG00000157379	DHRS1	chr14	-	24291138	24291625	24291138	24291219	24291555	24291625	6700	29,43	9,18	134,95	16,13	435	99	0.000900345	0.0285109	0.423,0.352	0.656,0.625	-0.253
ENSG00000214941	ZSWIM7	chr17	-	15977726	15978163	15977726	15977913	15978043	15978163	2106	17,22	10,16	55,52	11,14	229	99	0.00315105	0.0649033	0.424,0.373	0.684,0.616	-0.252
ENSG00000168067	MAP4K2	chr11	-	64791908	64792422	64791908	64792086	64792171	64792422	6257	0,0	4,4	6,1	6,3	184	99	0.000184996	0.00906479	0.0,0.0	0.35,0.152	-0.251
ENSG00000186364	NUDT17	chr1	+	145846432	145846690	145846432	145846458	145846597	145846690	6123	25,26	6,8	77,51	4,5	238	99	0.00391903	0.0762533	0.634,0.575	0.889,0.809	-0.244
ENSG00000241973	PI4KA	chr22	-	20712692	20713390	20712692	20712797	20713280	20713390	2087	173210	131155	937641	183170	582	99	4.88498e-15	1.13698e-11	0.183,0.187	0.466,0.391	-0.243
ENSG00000164073	MFSD8	chr4	-	127921523	127921963	127921523	127921771	127921859	127921963	2795	0,1	5,5	4,10	11,8	187	99	0.000571641	0.0209527	0.0,0.096	0.161,0.398	-0.232
ENSG00000163743	RCHY1	chr4	-	75490580	75491782	75490580	75490701	75491723	75491782	4664	3,10	6,4	48,50	8,9	1121	99	0.00158051	0.041333	0.042,0.181	0.346,0.329	-0.226
ENSG00000095397	WHRN	chr9	-	114424987	114426413	114424987	114425024	114426210	114426413	3501	187196	15,20	660582	23,21	1285	99	0.000417002	0.0162658	0.49,0.43	0.689,0.681	-0.225
ENSG00000163702	IL17RC	chr3	+	9923880	9924291	9923880	9924020	9924231	9924291	1479	14,20	14,19	83,50	36,15	310	99	0.00330359	0.0671538	0.242,0.252	0.424,0.516	-0.223
ENSG00000118515	SGK1	chr6	-	134174510	134174861	134174510	134174586	134174731	134174861	6782	0,0	4,6	6,10	12,11	244	99	3.53569e-05	0.00257166	0.0,0.0	0.169,0.269	-0.219
ENSG00000169045	HNRNPH1	chr5	-	179616125	179617110	179616125	179616218	179617020	179617110	2070	939830	68,79	25872902	75,91	901	99	6.07366e-10	6.06303e-07	0.603,0.536	0.791,0.778	-0.215
ENSG00000077463	SIRT6	chr19	-	4175027	4175760	4175027	4175111	4175679	4175760	992	74,85	6,1	106131	0,0	667	99	0.000303803	0.0128564	0.647,0.927	1.0,1.0	-0.213
ENSG00000249803	AC112178.1	chr5	+	136520174	136521145	136520174	136520274	136520747	136521145	5606	77,90	10,15	272204	18,10	572	99	0.00382561	0.0748245	0.571,0.509	0.723,0.779	-0.211
ENSG00000164050	PLXNB1	chr3	-	48410454	48411036	48410454	48410558	48410867	48411036	4057	6,9	14,12	16,18	8,9	408	99	0.00505547	0.0876199	0.094,0.154	0.327,0.327	-0.203
ENSG00000120318	ARAP3	chr5	-	141661683	141662255	141661683	141661789	141662042	141662255	1461	23,55	15,28	99,64	26,15	352	99	0.00557644	0.0937124	0.301,0.356	0.517,0.545	-0.203
ENSG00000113971	NPHP3	chr3	-	132684553	132686387	132684553	132684794	132686259	132686387	1874	18,14	9,9	56,50	10,6	1564	99	0.00131153	0.0366727	0.112,0.09	0.262,0.345	-0.202
ENSG00000171777	RASGRP4	chr19	-	38412930	38413297	38412930	38413049	38413192	38413297	2347	0,1	2,14	16,7	28,9	242	99	7.43573e-05	0.00438143	0.0,0.028	0.189,0.241	-0.201
ENSG00000102879	CORO1A	chr16	+	30186815	30187223	30186815	30186945	30187038	30187223	3482	0,0	8,12	6,1	7,5	192	99	0.000742218	0.0248158	0.0,0.0	0.307,0.093	-0.2
ENSG00000204410	MSH5	chr6	+	31743903	31744299	31743903	31744025	31744189	31744299	1482	67,84	64102	378343	167156	263	99	1.91236e-07	5.56376e-05	0.283,0.237	0.46,0.453	-0.197
ENSG00000206573	THUMPD3-AS1	chr3	-	9390289	9391826	9390289	9390497	9391678	9391826	5408	8151026	26,29	22132084	20,14	1280	99	1.05328e-07	3.26867e-05	0.708,0.732	0.895,0.92	-0.188
ENSG00000135473	PAN2	chr12	-	56319087	56319487	56319087	56319181	56319307	56319487	4605	62,70	32,46	300275	86,71	225	99	0.000203439	0.00966334	0.46,0.401	0.606,0.63	-0.188
ENSG00000159433	STARD9	chr15	+	42662793	42663917	42662793	42662891	42663280	42663917	4917	0,0	7,6	5,2	4,2	488	99	0.00167782	0.0426789	0.0,0.0	0.202,0.169	-0.185
ENSG00000182196	ARL6IP4	chr12	+	122981128	122981879	122981128	122981266	122981570	122981879	6103	99,89	16,17	216195	19,12	403	99	0.00449666	0.0824092	0.603,0.563	0.736,0.8	-0.185
ENSG00000223705	NSUN5P1	chr7	+	75412788	75415023	75412788	75412932	75414884	75415023	7219	10141103	31,39	22712161	25,36	2051	99	5.46492e-05	0.00358298	0.612,0.577	0.814,0.743	-0.184
ENSG00000182004	SNRPE	chr1	+	203861602	203862222	203861602	203861743	203862181	203862222	4709	114101	50,48	300275	69,51	537	99	6.20405e-05	0.00390268	0.296,0.279	0.445,0.499	-0.184
ENSG00000176438	SYNE3	chr14	-	95449930	95452383	95449930	95450105	95452246	95452383	1380	2,0	3,1	8,7	1,2	2240	99	0.0036355	0.0723216	0.029,0.0	0.261,0.134	-0.183
ENSG00000165792	METTL17	chr14	+	20994793	20995233	20994793	20994901	20995164	20995233	6581	232248	133170	769745	224214	362	99	5.00295e-08	1.94073e-05	0.323,0.285	0.484,0.488	-0.182
ENSG00000204348	DXO	chr6	-	31970342	31970825	31970342	31970478	31970605	31970825	3916	76,86	51,48	239217	76,58	226	99	0.000228516	0.0103276	0.395,0.44	0.579,0.621	-0.182
ENSG00000263753	LINC00667	chr18	+	5240647	5241889	5240647	5241255	5241698	5241889	5746	130100	12,11	362287	14,11	542	99	0.0051965	0.0889327	0.664,0.624	0.825,0.827	-0.182
ENSG00000198198	SZT2	chr1	+	43432988	43434485	43432988	43433190	43434385	43434485	551	83,83	18,25	264207	27,24	1294	99	0.000692299	0.023523	0.261,0.203	0.428,0.398	-0.181
ENSG00000214078	CPNE1	chr20	-	35630438	35631034	35630438	35630490	35630900	35631034	4305	70,59	3,3	139,98	1,0	509	99	0.00149984	0.0398959	0.819,0.793	0.964,1.0	-0.176
ENSG00000119723	COQ6	chr14	+	73958146	73959078	73958146	73958277	73958970	73959078	3741	83104	18,26	253294	30,32	792	99	0.00339678	0.068747	0.366,0.333	0.513,0.535	-0.174
ENSG00000124920	MYRF	chr11	+	61778828	61779570	61778828	61779423	61779497	61779570	2925	0,1	3,5	7,2	9,7	173	99	0.00267123	0.0587319	0.0,0.103	0.308,0.141	-0.173
ENSG00000105607	GCDH	chr19	+	12891486	12891974	12891486	12891522	12891830	12891974	3747	15,19	41,30	63,85	44,48	407	99	5.53756e-06	0.000628716	0.082,0.133	0.258,0.301	-0.172
ENSG00000006025	OSBPL7	chr17	-	47816106	47816482	47816106	47816202	47816387	47816482	3984	8,4	14,16	27,20	21,18	284	99	0.00522827	0.0891486	0.166,0.08	0.309,0.279	-0.171
ENSG00000165792	METTL17	chr14	+	20993117	20994063	20993117	20993191	20993968	20994063	6580	231216	104124	784742	174146	876	99	3.7065e-09	2.46482e-06	0.201,0.164	0.337,0.365	-0.168
ENSG00000175455	CCDC14	chr3	-	123955842	123956115	123955842	123955965	123956045	123956115	2258	26,48	33,46	91103	50,56	179	99	0.00412768	0.0781071	0.304,0.366	0.502,0.504	-0.168
ENSG00000164088	PPM1M	chr3	+	52249173	52250595	52249173	52249322	52249669	52250595	5796	6,5	11,9	26,27	17,14	446	99	0.00579079	0.0959292	0.108,0.11	0.253,0.3	-0.167
ENSG00000198198	SZT2	chr1	+	43427529	43428118	43427529	43427734	43428002	43428118	550	13,2	28,31	55,50	60,39	367	99	8.23423e-06	0.000853593	0.111,0.017	0.198,0.257	-0.164
ENSG00000196730	DAPK1	chr9	+	87639649	87639815	87639649	87639698	87639788	87639815	4686	1,2	17,20	30,12	41,43	189	99	0.000222536	0.0102212	0.03,0.05	0.277,0.128	-0.163
ENSG00000135473	PAN2	chr12	-	56322614	56323209	56322614	56322758	56323061	56323209	4606	80102	36,40	322271	70,59	402	99	0.00159211	0.041338	0.354,0.386	0.531,0.531	-0.161
ENSG00000177042	TMEM80	chr11	+	698868	700235	698868	698888	700141	700235	245	66108	26,23	224220	28,28	1352	99	0.00186374	0.0447201	0.157,0.256	0.369,0.365	-0.16
ENSG00000132522	GPS2	chr17	-	7313567	7313988	7313567	7313721	7313905	7313988	3293	81,76	67,80	251248	117112	283	99	8.05213e-05	0.00468534	0.297,0.249	0.429,0.436	-0.159
ENSG00000166888	STAT6	chr12	-	57105467	57106339	57105467	57105599	57106190	57106339	4914	53,86	32,31	176161	44,31	690	99	0.00320282	0.0654328	0.192,0.285	0.365,0.427	-0.158
ENSG00000149499	EML3	chr11	-	62603943	62604201	62603943	62604041	62604112	62604201	113	53,60	61,93	152145	127,81	170	99	0.0015407	0.0405194	0.336,0.273	0.411,0.51	-0.156
ENSG00000103253	HAGHL	chr16	+	728793	729715	728793	728895	729287	729715	1605	93155	4,6	169167	0,1	491	99	0.000169605	0.00858166	0.824,0.839	1.0,0.971	-0.154
ENSG00000183963	SMTN	chr22	+	31099061	31099896	31099061	31099179	31099744	31099896	6037	6,10	15,20	101,71	53,42	664	99	1.94478e-05	0.00164599	0.056,0.069	0.221,0.201	-0.149
ENSG00000102901	CENPT	chr16	-	67829764	67831358	67829764	67830548	67831215	67831358	6091	341356	66,82	899938	128,87	766	99	0.00172463	0.0432943	0.4,0.359	0.476,0.582	-0.149
ENSG00000130755	GMFG	chr19	-	39328358	39329073	39328358	39328548	39328999	39329073	5220	21,28	24,38	40,42	18,22	550	99	0.00172991	0.0432943	0.136,0.117	0.286,0.256	-0.145
ENSG00000108591	DRG2	chr17	+	18099632	18100435	18099632	18099723	18100362	18100435	1890	66,98	45,57	250183	68,55	738	99	0.000102059	0.00542266	0.164,0.187	0.33,0.309	-0.144
ENSG00000108465	CDK5RAP3	chr17	+	47973518	47974031	47973518	47973693	47973930	47974031	332	107124	8,13	365270	10,8	336	99	0.00216921	0.0494985	0.798,0.738	0.915,0.909	-0.144
ENSG00000058673	ZC3H11A	chr1	+	203801574	203803016	203801574	203801628	203802956	203803016	5900	10741027	15,33	21122010	21,11	1427	99	0.000672159	0.0232296	0.832,0.683	0.875,0.927	-0.143
ENSG00000197343	ZNF655	chr7	+	99561887	99562494	99561887	99561973	99562367	99562494	4206	302307	59,65	477410	51,49	493	99	0.00159846	0.041338	0.507,0.487	0.653,0.627	-0.143
ENSG00000080189	SLC35C2	chr20	-	46349527	46350890	46349527	46350524	46350760	46350890	1598	42,63	59,71	163164	90106	335	99	0.000223966	0.0102212	0.174,0.208	0.349,0.314	-0.141
ENSG00000114021	NIT2	chr3	+	100345584	100346255	100345584	100345678	100346180	100346255	5149	71,67	41,58	209224	73,71	601	99	0.000144872	0.00741075	0.222,0.16	0.32,0.342	-0.14
ENSG00000092929	UNC13D	chr17	-	75839838	75840329	75839838	75839942	75840224	75840329	4584	60,61	3,3	165193	1,1	381	99	0.00537615	0.0913358	0.839,0.841	0.977,0.98	-0.138
ENSG00000223705	NSUN5P1	chr7	+	75415591	75416191	75415591	75415770	75415980	75416191	7220	240271	20,24	532480	20,7	309	99	3.7781e-05	0.0027057	0.794,0.783	0.895,0.956	-0.137
ENSG00000204410	MSH5	chr6	+	31759096	31759512	31759096	31759177	31759424	31759512	1483	128173	52,57	605555	131116	346	99	0.00286348	0.0614262	0.413,0.465	0.569,0.578	-0.134
ENSG00000107331	ABCA2	chr9	-	137010972	137011309	137010972	137011105	137011185	137011309	5595	3,1	17,33	9,12	33,21	179	99	0.00149726	0.0398959	0.089,0.016	0.131,0.24	-0.133
ENSG00000101246	ARFRP1	chr20	-	63698642	63700702	63698642	63700530	63700601	63700702	4339	36,35	81,86	99125	134131	170	99	0.000806733	0.0262611	0.206,0.192	0.301,0.357	-0.13
ENSG00000131788	PIAS3	chr1	-	145856346	145857006	145856346	145856431	145856588	145857006	5724	5,5	23,30	24,25	42,35	256	99	0.00105028	0.0319545	0.078,0.061	0.181,0.216	-0.129
ENSG00000140525	FANCI	chr15	+	89281764	89283250	89281764	89281835	89283135	89283250	7230	349381	82,93	985972	131119	1399	99	7.05243e-05	0.00426352	0.231,0.225	0.347,0.366	-0.128
ENSG00000060971	ACAA1	chr3	-	38125825	38126700	38125825	38125881	38126161	38126700	6526	64,86	115151	263224	202170	379	99	5.97295e-07	0.00011585	0.127,0.13	0.254,0.256	-0.127
ENSG00000062822	POLD1	chr19	+	50415723	50416528	50415723	50415826	50416395	50416528	4128	162199	88105	530591	175144	668	99	0.000103677	0.00542266	0.214,0.219	0.31,0.378	-0.127
ENSG00000099331	MYO9B	chr19	+	17202841	17203258	17202841	17202883	17203146	17203258	5030	33,71	47,56	232178	119102	362	99	0.00405859	0.0776731	0.161,0.257	0.348,0.323	-0.127
ENSG00000185324	CDK10	chr16	+	89693273	89694232	89693273	89693467	89694172	89694232	5828	405484	39,57	11741104	79,65	804	99	0.00407137	0.0776731	0.561,0.511	0.647,0.677	-0.126
ENSG00000115286	NDUFS7	chr19	+	1393241	1395584	1393241	1393330	1395390	1395584	6165	491672	120147	20431755	230195	2159	99	3.71071e-07	8.63668e-05	0.158,0.173	0.289,0.292	-0.125
ENSG00000105726	ATP13A1	chr19	-	19645646	19645985	19645646	19645790	19645873	19645985	6595	41,21	120154	151122	238237	182	99	6.90398e-06	0.000751407	0.157,0.069	0.257,0.219	-0.125
ENSG00000105726	ATP13A1	chr19	-	19649740	19651797	19649740	19649940	19651688	19651797	6597	152160	42,60	589570	84,88	1847	99	2.15666e-05	0.00179273	0.162,0.125	0.273,0.258	-0.122
ENSG00000160796	NBEAL2	chr3	+	47007240	47007697	47007240	47007350	47007524	47007697	2164	127132	99,96	360334	169142	273	99	0.00170074	0.0430269	0.318,0.333	0.436,0.46	-0.122
ENSG00000005961	ITGA2B	chr17	-	44383937	44384138	44383937	44383946	44384084	44384138	1108	2,5	30,21	27,15	44,34	237	99	0.000678819	0.0232346	0.027,0.09	0.204,0.156	-0.121
ENSG00000076928	ARHGEF1	chr19	+	41892024	41892373	41892024	41892123	41892330	41892373	7225	26,27	64,75	118,75	122,86	306	99	7.04578e-05	0.00426352	0.116,0.104	0.238,0.22	-0.119
ENSG00000101365	IDH3B	chr20	-	2659698	2660176	2659698	2659793	2660029	2660176	6591	74,79	136148	337284	286246	335	99	2.32891e-06	0.000318855	0.139,0.136	0.258,0.254	-0.118
ENSG00000136878	USP20	chr9	+	129880112	129881828	129880112	129880289	129880466	129881828	4860	130205	121138	351385	181167	276	99	0.00186039	0.0447201	0.278,0.348	0.41,0.453	-0.118
ENSG00000094631	HDAC6	chrX	+	48805630	48806464	48805630	48805671	48806367	48806464	1212	82,90	85105	416313	168161	795	99	2.23676e-07	6.12478e-05	0.107,0.096	0.236,0.195	-0.114
ENSG00000141456	PELP1	chr17	-	4675273	4675884	4675273	4675362	4675796	4675884	53	55,61	55,90	230180	135,97	533	99	3.86463e-05	0.00272573	0.157,0.112	0.24,0.256	-0.113
ENSG00000105726	ATP13A1	chr19	-	19647413	19647759	19647413	19647528	19647598	19647759	6596	10,20	64,84	46,52	113,97	169	99	0.00127545	0.0362351	0.084,0.122	0.193,0.239	-0.113
ENSG00000065000	AP3D1	chr19	-	2109085	2109958	2109085	2109125	2109872	2109958	1225	209249	3,5	525504	2,0	846	99	0.00184802	0.0447201	0.891,0.854	0.968,1.0	-0.111
ENSG00000168010	ATG16L2	chr11	+	72828358	72828776	72828358	72828508	72828728	72828776	5181	0,1	9,6	7,7	17,12	319	99	0.00121102	0.035233	0.0,0.049	0.113,0.153	-0.109
ENSG00000116809	ZBTB17	chr1	-	15943598	15943895	15943598	15943715	15943807	15943895	4857	3,1	27,28	13,18	45,50	191	99	0.000908005	0.0285592	0.054,0.018	0.13,0.157	-0.108
ENSG00000099949	LZTR1	chr22	+	20994869	20995872	20994869	20995026	20995745	20995872	6630	117155	135126	512469	185244	818	99	4.60894e-07	0.000102165	0.095,0.13	0.251,0.189	-0.107
ENSG00000140521	POLG	chr15	-	89317375	89318749	89317375	89317536	89318540	89318749	5478	138167	78,74	413437	131,92	1103	99	0.00041005	0.0162171	0.137,0.168	0.221,0.299	-0.107
ENSG00000106263	EIF3B	chr7	+	2379393	2380740	2379393	2379511	2380278	2380740	1643	498544	93137	12251160	167164	866	99	0.00284568	0.061327	0.38,0.312	0.456,0.447	-0.106
ENSG00000115942	ORC2	chr2	-	200913294	200913992	200913294	200913413	200913930	200913992	6862	100,90	87103	288362	150172	616	99	4.69253e-05	0.00321231	0.156,0.123	0.236,0.253	-0.105
ENSG00000103197	TSC2	chr16	+	2060669	2062008	2060669	2060813	2061870	2062008	3487	53,57	32,41	160221	52,64	1156	99	0.000565119	0.020878	0.124,0.106	0.209,0.228	-0.104
ENSG00000100038	TOP3B	chr22	-	21957026	21958693	21957026	21957595	21958491	21958693	2754	10621214	42,68	28112596	89,63	995	99	0.00434591	0.0807207	0.716,0.64	0.759,0.804	-0.104
ENSG00000061273	HDAC7	chr12	-	47784078	47785471	47784078	47784217	47785386	47785471	713	438575	99137	14801247	190196	1268	99	0.000897489	0.0285109	0.257,0.247	0.378,0.332	-0.103
ENSG00000111653	ING4	chr12	-	6652661	6653050	6652661	6652770	6652935	6653050	2414	0,2	12,6	18,7	26,22	264	99	0.00167253	0.0426789	0.0,0.111	0.206,0.107	-0.101
ENSG00000129197	RPAIN	chr17	+	5425970	5428211	5425970	5426299	5428070	5428211	4663	139169	57,69	460391	87,78	1870	99	5.56406e-05	0.00359732	0.114,0.115	0.219,0.21	-0.1
ENSG00000184661	CDCA2	chr8	+	25460239	25460554	25460239	25460300	25460383	25460554	2969	21,28	88,89	97,83	160169	182	99	0.00206902	0.0479169	0.115,0.146	0.248,0.211	-0.099
ENSG00000143442	POGZ	chr1	-	151406606	151407023	151406606	151406631	151406910	151407023	150	10,12	55,53	57,55	78,93	378	99	3.27236e-05	0.00241791	0.045,0.056	0.161,0.134	-0.097
ENSG00000283633	AP000547.3	chr22	+	16614076	16615111	16614076	16614178	16614698	16615111	5811	41314974	176165	973210365	171180	619	99	6.83535e-08	2.44758e-05	0.79,0.828	0.901,0.902	-0.093
ENSG00000064601	CTSA	chr20	+	45892272	45892484	45892272	45892323	45892397	45892484	2196	5,9	62,93	44,38	153134	173	99	0.000177594	0.0088045	0.044,0.052	0.141,0.14	-0.093
ENSG00000168488	ATXN2L	chr16	+	28835932	28837237	28835932	28836122	28836727	28837237	6440	9821284	34,58	41523734	80,83	704	99	0.00050288	0.0190318	0.802,0.757	0.879,0.864	-0.092
ENSG00000115307	AUP1	chr2	-	74528750	74529282	74528750	74528935	74529131	74529282	3668	193273	186274	621658	405410	295	99	0.00226921	0.0512776	0.258,0.251	0.34,0.35	-0.09
ENSG00000102125	TAZ	chrX	+	154413206	154413567	154413206	154413252	154413481	154413567	2566	6,12	32,36	43,37	64,61	328	99	0.00485359	0.0872334	0.054,0.091	0.169,0.155	-0.09
ENSG00000122952	ZWINT	chr10	-	56357437	56358459	56357437	56358185	56358376	56358459	1763	175240	394419	572491	598574	290	99	3.06952e-05	0.0023424	0.132,0.164	0.246,0.226	-0.088
ENSG00000186635	ARAP1	chr11	-	72696548	72697195	72696548	72696654	72696982	72697195	3438	43,43	75,83	204143	176144	427	99	0.000592566	0.0213829	0.117,0.107	0.212,0.187	-0.088
ENSG00000187091	PLCD1	chr3	-	38008457	38009158	38008457	38008636	38009041	38009158	2334	103102	172218	313287	327218	504	99	3.56532e-06	0.000436752	0.105,0.084	0.158,0.205	-0.087
ENSG00000144224	UBXN4	chr2	+	135753538	135754277	135753538	135753567	135754158	135754277	2340	94,80	57,71	248251	111102	690	99	0.00445652	0.0819964	0.191,0.139	0.243,0.261	-0.087
ENSG00000089818	NECAP1	chr12	+	8090194	8091850	8090194	8090299	8091768	8091850	1768	74,77	21,44	238222	60,41	1568	99	0.00506617	0.0876199	0.182,0.099	0.2,0.255	-0.087
ENSG00000123737	EXOSC9	chr4	+	121813865	121816447	121813865	121814047	121816368	121816447	5676	584559	148153	11541127	150182	2420	99	7.24661e-05	0.00432474	0.139,0.13	0.239,0.202	-0.086
ENSG00000104783	KCNN4	chr19	-	43766532	43767707	43766532	43767089	43767539	43767707	6200	26,66	56,81	215131	158107	549	99	0.000961361	0.0298342	0.077,0.128	0.197,0.181	-0.086
ENSG00000165792	METTL17	chr14	+	20995900	20996292	20995900	20995951	20996208	20996292	6582	105126	274315	489433	569583	356	99	1.82712e-06	0.000283508	0.096,0.1	0.193,0.171	-0.084
ENSG00000172809	RPL38	chr17	+	74203703	74203958	74203703	74203770	74203917	74203958	1955	176254	13,11	557467	7,11	246	99	0.00294476	0.0625929	0.845,0.903	0.97,0.945	-0.084
ENSG00000165792	METTL17	chr14	+	20990229	20990598	20990229	20990383	20990463	20990598	6579	28,34	106132	113,99	237203	179	99	0.00309098	0.0645225	0.127,0.125	0.209,0.212	-0.084
ENSG00000111364	DDX55	chr12	+	123607431	123608829	123607431	123607662	123608679	123608829	2358	167204	149170	704529	236286	1116	99	8.25171e-06	0.000853593	0.09,0.096	0.209,0.141	-0.082
ENSG00000013441	CLK1	chr2	-	200856890	200857884	200856890	200856985	200857717	200857884	1012	38,71	72,85	178212	136117	831	99	4.82577e-05	0.00325564	0.059,0.091	0.135,0.178	-0.082
ENSG00000159348	CYB5R1	chr1	-	202965886	202966600	202965886	202965993	202966527	202966600	1300	44,84	56,69	220175	131,94	633	99	0.0059829	0.0978369	0.109,0.16	0.208,0.226	-0.082
ENSG00000169045	HNRNPH1	chr5	-	179616868	179617110	179616868	179616958	179617050	179617110	2071	318293	12031219	10541273	22962650	191	99	1.12049e-06	0.000196102	0.121,0.111	0.192,0.199	-0.08
ENSG00000138074	SLC5A6	chr2	-	27202812	27203345	27202812	27202880	27203232	27203345	2863	104109	118135	354285	237214	451	99	0.0020253	0.0473757	0.162,0.151	0.247,0.226	-0.08
ENSG00000184575	XPOT	chr12	+	64425037	64425457	64425037	64425182	64425337	64425457	2079	83,82	168185	289295	415339	254	99	0.00213306	0.0491554	0.161,0.147	0.213,0.253	-0.079
ENSG00000198000	NOL8	chr9	-	92298256	92298954	92298256	92298336	92298883	92298954	4090	181141	142159	583589	309327	646	99	0.000398509	0.0159919	0.163,0.12	0.224,0.216	-0.078
ENSG00000167106	FAM102A	chr9	-	127940880	127944684	127940880	127943237	127944614	127944684	4258	7,5	6,23	64,38	28,21	1476	99	2.55697e-05	0.00207626	0.073,0.014	0.133,0.108	-0.077
ENSG00000177054	ZDHHC13	chr11	+	19166301	19170568	19166301	19166385	19170410	19170568	2858	65,70	28,30	256189	31,44	4124	99	0.000313807	0.0130426	0.053,0.053	0.165,0.093	-0.076
ENSG00000117410	ATP6V0B	chr1	+	43977025	43978295	43977025	43977216	43977980	43978295	2995	436503	520625	18291617	1086978	863	99	4.44869e-08	1.8826e-05	0.088,0.085	0.162,0.159	-0.074
ENSG00000174996	KLC2	chr11	+	66266432	66267859	66266432	66266490	66266872	66267859	4155	18,16	30,58	58,49	68,52	481	99	0.00290434	0.0620169	0.11,0.054	0.149,0.162	-0.073
ENSG00000119707	RBM25	chr14	+	73099666	73103478	73099666	73099750	73103191	73103478	1165	825881	166202	22702270	258295	3540	99	6.72439e-05	0.00417361	0.122,0.109	0.197,0.177	-0.072
ENSG00000171456	ASXL1	chr20	+	32428127	32428422	32428127	32428248	32428324	32428422	4238	9,4	54,76	38,25	117122	175	99	0.00341151	0.068747	0.086,0.029	0.155,0.104	-0.072
ENSG00000146830	GIGYF1	chr7	-	100684019	100684337	100684019	100684157	100684236	100684337	777	3,0	27,46	13,12	60,67	178	99	0.00141206	0.0388799	0.058,0.0	0.108,0.091	-0.071
ENSG00000115204	MPV17	chr2	-	27312213	27312589	27312213	27312246	27312493	27312589	1516	42,63	127190	166208	317270	346	99	0.000442403	0.0170197	0.086,0.087	0.13,0.181	-0.069
ENSG00000070423	RNF126	chr19	-	648881	649748	648881	648975	649678	649748	3051	45,67	112169	204247	260184	802	99	5.21204e-07	0.000110282	0.047,0.047	0.088,0.142	-0.068
ENSG00000162909	CAPN2	chr1	+	223769840	223770525	223769840	223769909	223770446	223770525	4342	152177	175205	517420	343294	636	99	0.000746339	0.0248158	0.119,0.118	0.19,0.182	-0.068
ENSG00000143416	SELENBP1	chr1	-	151365767	151366453	151365767	151365846	151366274	151366453	236	33,43	79,86	105,96	105114	527	99	0.00187543	0.0447698	0.073,0.086	0.158,0.137	-0.068
ENSG00000265681	RPL17	chr18	-	49491531	49491833	49491531	49491584	49491735	49491833	223	14191790	133221	38493101	286193	250	99	0.00149558	0.0398959	0.809,0.762	0.842,0.864	-0.067
ENSG00000007202	KIAA0100	chr17	-	28639574	28640025	28639574	28639642	28639900	28640025	3169	36,86	120179	214195	311268	357	99	0.00206898	0.0479169	0.077,0.118	0.16,0.168	-0.067
ENSG00000130826	DKC1	chrX	+	154774601	154775273	154774601	154774705	154775194	154775273	84	237306	450511	1137808	896922	588	99	5.42509e-06	0.000628716	0.081,0.092	0.176,0.129	-0.066
ENSG00000241973	PI4KA	chr22	-	20733735	20734194	20733735	20733843	20734042	20734194	2088	9,11	71107	63,45	171142	298	99	9.87598e-05	0.00540855	0.04,0.033	0.109,0.095	-0.066
ENSG00000091640	SPAG7	chr17	-	4959225	4959916	4959225	4959643	4959759	4959916	4633	9,3	69,81	46,21	130146	215	99	0.00131534	0.0366727	0.057,0.017	0.14,0.062	-0.064
ENSG00000105655	ISYNA1	chr19	-	18437859	18438162	18437859	18437988	18438092	18438162	6737	0,0	7,40	14,1	55,35	203	99	0.00100055	0.0308449	0.0,0.0	0.11,0.014	-0.062
ENSG00000085662	AKR1B1	chr7	-	134447297	134448061	134447297	134447381	134447979	134448061	6688	1,1	9,15	20,9	34,17	697	99	0.000825956	0.0267002	0.016,0.009	0.077,0.07	-0.061
ENSG00000154743	TSEN2	chr3	+	12529761	12531659	12529761	12529873	12531569	12531659	3123	162209	94,60	493504	116126	1795	99	0.0040637	0.0776731	0.087,0.161	0.19,0.181	-0.061
ENSG00000104731	KLHDC4	chr16	-	87755193	87756477	87755193	87755292	87756398	87756477	2456	67,73	53,67	190208	79111	1205	99	0.00549215	0.0929672	0.094,0.082	0.165,0.133	-0.061
ENSG00000164080	RAD54L2	chr3	+	51638143	51639670	51638143	51638321	51639418	51639670	2430	9,4	17,21	33,37	43,24	1196	99	0.00401196	0.0774924	0.042,0.016	0.06,0.113	-0.057
ENSG00000111665	CDCA3	chr12	-	6850466	6851009	6850466	6850596	6850832	6851009	6400	25,25	71115	88,85	182152	335	99	0.0058617	0.0964756	0.094,0.06	0.125,0.142	-0.057
ENSG00000140521	POLG	chr15	-	89320765	89321260	89320765	89321012	89321124	89321260	5481	4,2	67,85	27,28	152166	211	99	0.000250756	0.011012	0.027,0.011	0.077,0.073	-0.056
ENSG00000132522	GPS2	chr17	-	7312660	7313124	7312660	7312839	7313028	7313124	3290	7,11	62,96	57,51	182178	288	99	0.00126534	0.0362351	0.037,0.038	0.097,0.09	-0.056
ENSG00000054967	RELT	chr11	+	73394235	73394734	73394235	73394317	73394476	73394734	2417	0,1	23,24	8,8	48,42	258	99	0.00489993	0.0875478	0.0,0.016	0.06,0.068	-0.056
ENSG00000100911	PSME2	chr14	-	24144399	24145155	24144399	24144468	24145057	24145155	6222	115108	278312	456388	513518	688	99	2.2789e-06	0.000318855	0.056,0.047	0.113,0.097	-0.054
ENSG00000115282	TTC31	chr2	+	74490655	74491184	74490655	74490739	74491127	74491184	6086	25,19	54,81	69,91	121119	487	99	0.00507208	0.0876199	0.086,0.046	0.104,0.135	-0.053
ENSG00000123136	DDX39A	chr19	-	14409741	14410334	14409741	14409873	14410215	14410334	1457	193217	379405	436459	591491	441	99	0.00267479	0.0587319	0.103,0.107	0.142,0.173	-0.052
ENSG00000102119	EMD	chrX	+	154379941	154380367	154379941	154380019	154380233	154380367	4604	140208	493527	495499	925888	313	99	0.00149331	0.0398959	0.082,0.111	0.145,0.151	-0.051
ENSG00000234741	GAS5	chr1	-	173863900	173864304	173863900	173864075	173864256	173864304	3442	474616	8901042	1032978	31472421	280	99	0.00154064	0.0405194	0.158,0.173	0.104,0.125	0.051
ENSG00000234741	GAS5	chr1	-	173865856	173866206	173865856	173865894	173866176	173866206	3450	825778	10551367	13701419	39553006	381	99	0.000177792	0.0088045	0.169,0.129	0.083,0.109	0.053
ENSG00000234608	MAPKAPK5-AS1	chr12	-	111841326	111841710	111841326	111841470	111841683	111841710	280	241244	0,2	465502	13,9	312	99	0.00185809	0.0447201	1.0,0.975	0.919,0.947	0.054
ENSG00000166986	MARS1	chr12	+	57489266	57489558	57489266	57489345	57489454	57489558	704	113,99	2,0	300301	11,12	208	99	0.00429729	0.0803368	0.964,1.0	0.928,0.923	0.056
ENSG00000234741	GAS5	chr1	-	173866527	173866796	173866527	173866567	173866760	173866796	3451	10001219	15221921	22751836	57064423	292	99	0.000292039	0.012472	0.182,0.177	0.119,0.123	0.058
ENSG00000175826	CTDNEP1	chr17	-	7243590	7244245	7243590	7243951	7244188	7244245	1814	558760	11,2	14011250	41,42	336	99	0.000197499	0.00947793	0.937,0.991	0.91,0.898	0.06
ENSG00000234741	GAS5	chr1	-	173864256	173864704	173864256	173864304	173864674	173864704	3444	24352359	45,62	39994229	167165	469	99	0.000546605	0.0203556	0.919,0.889	0.835,0.844	0.065
ENSG00000255717	SNHG1	chr11	-	62853800	62855837	62853800	62854551	62855423	62855837	7062	11541173	2,0	20271949	19,14	971	99	2.58696e-05	0.00207626	0.983,1.0	0.916,0.934	0.067
ENSG00000234741	GAS5	chr1	-	173865228	173865547	173865228	173865282	173865509	173865547	3449	881900	8111034	19031800	30992776	326	99	0.00066936	0.0232296	0.248,0.209	0.157,0.165	0.067
ENSG00000142541	RPL13A	chr19	+	49489849	49490297	49489849	49489912	49490231	49490297	1099	159193	141183	418411	641598	418	99	0.00235908	0.0530508	0.211,0.2	0.134,0.14	0.069
ENSG00000255717	SNHG1	chr11	-	62854518	62854938	62854518	62854551	62854887	62854938	7057	430490	290308	890742	876725	435	99	0.00306183	0.0642018	0.252,0.266	0.188,0.189	0.071
ENSG00000255717	SNHG1	chr11	-	62855132	62855885	62855132	62855216	62855423	62855885	7063	462483	472582	724759	14341224	306	99	0.000357134	0.014583	0.241,0.212	0.14,0.167	0.073
ENSG00000119760	SUPT7L	chr2	-	27660983	27662281	27660983	27661601	27662178	27662281	6023	526487	7,4	11941177	30,40	676	99	0.00134844	0.037363	0.917,0.947	0.854,0.812	0.099
ENSG00000105677	TMEM147	chr19	+	35546671	35547240	35546671	35546808	35547118	35547240	4792	50,56	0,0	131164	4,4	409	99	0.00554778	0.0935686	1.0,1.0	0.888,0.908	0.102
ENSG00000234741	GAS5	chr1	-	173864483	173864704	173864483	173864506	173864674	173864704	3445	14401378	9241133	24432715	36222740	267	99	1.80969e-05	0.00158945	0.366,0.311	0.2,0.269	0.104
ENSG00000011243	AKAP8L	chr19	-	15403474	15403715	15403474	15403555	15403657	15403715	1394	345427	38,54	766686	167137	201	99	0.00112033	0.0334303	0.817,0.796	0.693,0.712	0.104
ENSG00000111261	MANSC1	chr12	-	12343091	12343414	12343091	12343173	12343275	12343414	5769	20,31	0,1	63,53	3,6	201	99	0.00393143	0.0762533	1.0,0.939	0.912,0.813	0.107
ENSG00000148399	DPH7	chr9	-	137575708	137576167	137575708	137575892	137576079	137576167	1836	79110	1,1	155132	4,12	286	99	0.0018157	0.0447201	0.965,0.974	0.931,0.792	0.108
ENSG00000134222	PSRC1	chr1	-	109282679	109283122	109282679	109282789	109283073	109283122	4890	23,40	1,0	92,61	6,3	383	99	0.00381593	0.0748245	0.856,1.0	0.799,0.84	0.108
ENSG00000168701	TMEM208	chr16	+	67228796	67229278	67228796	67228836	67228975	67229278	4286	38,50	2,0	110,86	12,5	238	99	0.00409756	0.0778537	0.888,1.0	0.792,0.877	0.109
ENSG00000131187	F12	chr5	-	177403480	177404090	177403480	177403617	177403858	177404090	3886	9,26	1,0	39,41	5,3	340	99	0.00429178	0.0803368	0.724,1.0	0.694,0.799	0.116
ENSG00000234741	GAS5	chr1	-	173864256	173864506	173864256	173864304	173864483	173864506	3443	12151221	8341050	20492001	32942553	278	99	9.60326e-08	3.19309e-05	0.342,0.293	0.181,0.218	0.118
ENSG00000196756	SNHG17	chr20	-	38421005	38422241	38421005	38421098	38422095	38422241	1755	215229	1,0	476454	8,6	1096	99	0.000580291	0.0211036	0.951,1.0	0.843,0.872	0.118
ENSG00000072694	FCGR2B	chr1	+	161673959	161677365	161673959	161674073	161677327	161677365	4210	48,96	0,1	166,94	5,0	3353	99	0.00561352	0.0939962	1.0,0.739	0.495,1.0	0.122
ENSG00000102225	CDK16	chrX	+	47226993	47227223	47226993	47227099	47227159	47227223	2008	4,11	1,0	15,14	5,2	159	99	0.00496512	0.0875478	0.714,1.0	0.651,0.813	0.125
ENSG00000006015	REX1BD	chr19	+	18588994	18589683	18588994	18589077	18589478	18589683	4726	65102	0,0	140125	6,2	500	99	0.00103401	0.0316665	1.0,1.0	0.822,0.925	0.127
ENSG00000175061	SNHG29	chr17	+	16439326	16439703	16439326	16439414	16439527	16439703	1538	167193	207250	317280	986785	212	99	3.22147e-09	2.46482e-06	0.274,0.265	0.131,0.143	0.133
ENSG00000178904	DPY19L3	chr19	+	32467473	32468813	32467473	32467626	32468730	32468813	4832	148133	0,0	254191	4,2	1203	99	0.00438893	0.0810734	1.0,1.0	0.839,0.887	0.137
ENSG00000108671	PSMD11	chr17	+	32479250	32480197	32479250	32479376	32480145	32480197	3970	85,76	0,1	219183	4,7	868	99	0.00180453	0.0446813	1.0,0.897	0.862,0.749	0.143
ENSG00000172932	ANKRD13D	chr11	+	67299057	67299611	67299057	67299124	67299529	67299611	4963	57,88	26,37	109133	102145	504	99	0.000102715	0.00542266	0.301,0.318	0.173,0.153	0.147
ENSG00000166471	TMEM41B	chr11	-	9280653	9283593	9280653	9281041	9283370	9283593	3834	15681666	7,5	34032950	47,33	2428	99	2.91762e-05	0.00226358	0.901,0.931	0.747,0.785	0.15
ENSG00000260565	ERVK13-1	chr16	-	2671023	2672570	2671023	2671231	2671344	2672570	5735	10,17	1,0	20,21	3,3	212	99	0.00470359	0.0852032	0.824,1.0	0.757,0.766	0.15
ENSG00000168036	CTNNB1	chr3	+	41239133	41239900	41239133	41239354	41239659	41239900	6514	263317	34,41	520437	113124	404	99	0.00035276	0.0145318	0.655,0.655	0.53,0.463	0.158
ENSG00000196642	RABL6	chr9	+	136831720	136832370	136831720	136831861	136832261	136832370	2911	66,88	2,0	134143	8,8	499	99	0.00192121	0.0453971	0.867,1.0	0.769,0.78	0.159
ENSG00000139372	TDG	chr12	+	103982798	103983389	103982798	103982934	103983294	103983389	1992	33,33	0,0	83,73	5,2	459	99	0.00072286	0.0243834	1.0,1.0	0.782,0.887	0.165
ENSG00000104880	ARHGEF18	chr19	+	7470125	7472477	7470125	7470315	7470536	7472477	7145	28,37	2,0	66,69	7,8	320	99	0.00586522	0.0964756	0.812,1.0	0.745,0.727	0.17
ENSG00000242086	MUC20-OT1	chr3	+	195708133	195708807	195708133	195708435	195708746	195708807	4437	8,27	0,0	65,75	3,4	410	99	0.0012692	0.0362351	1.0,1.0	0.84,0.819	0.171
ENSG00000114857	NKTR	chr3	+	42620015	42621516	42620015	42620043	42621428	42621516	1703	297311	17,18	529453	59,62	1484	99	0.000752633	0.0248476	0.538,0.535	0.374,0.328	0.185
ENSG00000213339	QTRT1	chr19	+	10712160	10712628	10712160	10712299	10712552	10712628	5153	111173	44,67	130119	126112	352	99	1.13744e-06	0.000196102	0.415,0.421	0.225,0.23	0.19
ENSG00000138796	HADH	chr4	+	108027687	108028069	108027687	108027760	108027938	108028069	3094	8,12	1,0	23,30	6,3	277	99	0.0030266	0.0640401	0.741,1.0	0.578,0.781	0.191
ENSG00000146707	POMZP3	chr7	-	76618182	76618615	76618182	76618300	76618496	76618615	2561	22,24	0,1	68,63	14,3	295	99	0.000775057	0.0254077	1.0,0.89	0.62,0.876	0.197
ENSG00000110492	MDK	chr11	+	46381710	46382133	46381710	46381885	46382056	46382133	1943	39,68	6,7	112,91	34,28	270	99	0.00496096	0.0875478	0.704,0.781	0.547,0.544	0.197
ENSG00000197070	ARRDC1	chr9	+	137613614	137614214	137613614	137613769	137614139	137614214	354	40,33	0,0	86,68	9,1	469	99	1.26885e-05	0.00123052	1.0,1.0	0.669,0.935	0.198
ENSG00000179406	LINC00174	chr7	-	66491030	66491471	66491030	66491239	66491349	66491471	3997	32,26	1,0	35,41	7,4	209	99	0.000242965	0.010875	0.938,1.0	0.703,0.829	0.203
ENSG00000071889	FAM3A	chrX	-	154515759	154516242	154515759	154515812	154515909	154516242	1663	77,89	6,14	127127	50,36	196	99	0.00041109	0.0162171	0.866,0.763	0.562,0.641	0.213
ENSG00000225470	JPX	chrX	+	73998767	74000496	73998767	73998844	73998953	74000496	6407	10,7	7,14	10,10	52,53	208	99	0.00599002	0.0978369	0.405,0.192	0.084,0.082	0.215
ENSG00000135974	C2orf49	chr2	+	105342847	105343223	105342847	105342974	105343100	105343223	3900	189172	20,34	349345	144135	225	99	6.94103e-06	0.000751407	0.806,0.69	0.516,0.529	0.226
ENSG00000196756	SNHG17	chr20	-	38426418	38427444	38426418	38426503	38427246	38427444	1759	95111	0,1	162167	9,5	842	99	9.04886e-05	0.0050794	1.0,0.929	0.679,0.797	0.227
ENSG00000173818	ENDOV	chr17	+	80415452	80415821	80415452	80415518	80415649	80415821	403	9,5	0,0	16,14	2,2	230	99	0.00565505	0.0943521	1.0,1.0	0.775,0.751	0.237
ENSG00000174652	ZNF266	chr19	-	9418761	9419299	9418761	9418895	9419050	9419299	3876	33,42	0,4	60,58	15,10	254	99	0.00378478	0.0748245	1.0,0.804	0.609,0.693	0.251
ENSG00000148187	MRRF	chr9	+	122285168	122285946	122285168	122285287	122285779	122285946	568	68,98	14,10	129,96	52,48	591	99	0.000656697	0.0231585	0.449,0.621	0.294,0.251	0.263
ENSG00000164620	RELL2	chr5	+	141636949	141638409	141636949	141637741	141638169	141638409	6242	66,79	1,3	163152	21,17	527	99	0.000529745	0.0198868	0.925,0.832	0.593,0.627	0.269
ENSG00000142046	TMEM91	chr19	+	41382771	41384083	41382771	41382921	41383885	41384083	3009	45,41	0,0	113,75	5,2	1063	99	2.67825e-05	0.0021131	1.0,1.0	0.678,0.777	0.272
ENSG00000157020	SEC13	chr3	-	10319138	10319316	10319138	10319172	10319256	10319316	580	19,9	0,0	15,26	4,4	183	99	1.33066e-05	0.00126412	1.0,1.0	0.67,0.779	0.275
ENSG00000182473	EXOC7	chr17	-	76087653	76088562	76087653	76087720	76088463	76088562	355	25,23	0,0	56,45	3,2	842	99	0.000617959	0.0219588	1.0,1.0	0.687,0.726	0.293
ENSG00000197912	SPG7	chr16	+	89545871	89546760	89545871	89546181	89546657	89546760	4559	28,14	0,1	38,51	9,4	575	99	0.000673684	0.0232296	1.0,0.707	0.421,0.687	0.299
ENSG00000237125	HAND2-AS1	chr4	+	173536847	173541931	173536847	173536970	173541474	173541931	276	107,94	0,0	192191	3,1	4603	99	0.00499107	0.0876199	1.0,1.0	0.579,0.804	0.308
ENSG00000260565	ERVK13-1	chr16	-	2669410	2672570	2669410	2669561	2671023	2672570	5733	96,68	0,0	103137	4,3	1561	99	9.55523e-06	0.000966947	1.0,1.0	0.62,0.743	0.319
ENSG00000196295	GARS1-DT	chr7	-	30576563	30578091	30576563	30576710	30577648	30578091	866	40,36	0,1	93,78	10,4	1037	99	0.000387041	0.0156667	1.0,0.775	0.47,0.651	0.327
ENSG00000137221	TJAP1	chr6	+	43502587	43503508	43502587	43502617	43503400	43503508	4824	19,21	0,0	32,38	2,2	882	99	0.00110776	0.0332684	1.0,1.0	0.642,0.681	0.339
ENSG00000213213	CCDC183	chr9	+	136806077	136806867	136806077	136806672	136806756	136806867	7133	7,8	0,0	16,10	3,4	183	99	1.20089e-05	0.00118939	1.0,1.0	0.743,0.575	0.341
ENSG00000177728	TMEM94	chr17	+	75485870	75486426	75485870	75485998	75486289	75486426	1275	11,11	2,7	6,9	24,18	390	99	0.00131565	0.0366727	0.583,0.285	0.06,0.113	0.347
ENSG00000108405	P2RX1	chr17	-	3903550	3904024	3903550	3903631	3903927	3904024	3247	12,23	0,1	22,32	4,7	395	99	0.000209869	0.00976941	1.0,0.852	0.58,0.534	0.369
ENSG00000145020	AMT	chr3	-	49418970	49419405	49418970	49419151	49419259	49419405	2937	1,2	0,0	9,14	2,5	207	99	3.82379e-06	0.000456403	1.0,1.0	0.683,0.572	0.373
ENSG00000165125	TRPV6	chr7	-	142873447	142874142	142873447	142873716	142874075	142874142	6219	6,14	0,0	12,20	2,2	458	99	0.00192066	0.0453971	1.0,1.0	0.565,0.684	0.375
ENSG00000108591	DRG2	chr17	+	18099016	18100435	18099016	18099093	18099632	18100435	1886	22,35	0,0	61,66	6,7	638	99	3.55327e-06	0.000436752	1.0,1.0	0.612,0.594	0.397
ENSG00000243649	CFB	chr6	+	31950285	31950772	31950285	31950403	31950618	31950772	6955	4,5	0,1	1,8	4,1	314	99	0.00182808	0.0447201	1.0,0.612	0.073,0.716	0.412
ENSG00000085465	OVGP1	chr1	-	111421275	111421673	111421275	111421461	111421564	111421673	4495	4,2	0,1	5,4	8,3	202	99	0.0011762	0.0346533	1.0,0.495	0.234,0.395	0.433
ENSG00000204271	SPIN3	chrX	-	56978291	56978660	56978291	56978421	56978579	56978660	1726	4,2	1,0	3,3	2,2	257	99	0.00271463	0.0590496	0.606,1.0	0.366,0.366	0.437
ENSG00000170949	ZNF160	chr19	-	53091412	53091720	53091412	53091529	53091636	53091720	4244	8,8	0,1	10,9	5,6	206	99	0.00010568	0.00546599	1.0,0.794	0.49,0.419	0.443
ENSG00000197037	ZSCAN25	chr7	+	99619560	99621574	99619560	99619997	99621372	99621574	7215	15,20	1,0	62,51	6,14	1474	99	0.00166404	0.0426789	0.502,1.0	0.41,0.197	0.448
ENSG00000006534	ALDH3B1	chr11	+	68015296	68018637	68015296	68015459	68018526	68018637	3763	2,1	0,0	6,8	2,0	3166	99	0.00571823	0.0950655	1.0,1.0	0.086,1.0	0.457
ENSG00000278053	DDX52	chr17	-	37619767	37621277	37619767	37619839	37621126	37621277	5097	25,45	0,0	69,48	3,4	1386	99	2.38598e-07	6.17042e-05	1.0,1.0	0.622,0.462	0.458
ENSG00000122678	POLM	chr7	-	44074130	44074530	44074130	44074233	44074397	44074530	7190	2,1	0,0	8,9	2,4	263	99	3.43266e-06	0.000436752	1.0,1.0	0.601,0.459	0.47
ENSG00000065717	TLE2	chr19	-	3019282	3019773	3019282	3019466	3019698	3019773	1585	3,5	0,0	17,12	4,4	331	99	1.6923e-06	0.000271643	1.0,1.0	0.56,0.473	0.484
ENSG00000234772	LINC00412	chr13	-	27236281	27236587	27236281	27236356	27236444	27236587	7185	2,1	0,0	4,4	2,2	187	99	0.000269166	0.0116016	1.0,1.0	0.514,0.514	0.486
ENSG00000165801	ARHGEF40	chr14	+	21088829	21089545	21088829	21088876	21089013	21089545	2237	2,1	0,0	7,21	8,3	236	99	6.91723e-07	0.000128799	1.0,1.0	0.269,0.746	0.492
ENSG00000265590	CFAP298-TCP10L	chr21	-	32573283	32574676	32573283	32573368	32574575	32574676	3611	2,1	0,0	0,7	2,0	1306	99	0.00088804	0.0285091	1.0,1.0	0.0,1.0	0.5
ENSG00000168291	PDHB	chr3	-	58429707	58430238	58429707	58429941	58430127	58430238	1776	4,5	0,0	4,11	3,2	285	99	5.17566e-05	0.00344182	1.0,1.0	0.317,0.656	0.513
ENSG00000172771	EFCAB12	chr3	-	129402522	129404403	129402522	129402579	129404249	129404403	1688	24,34	0,0	47,29	1,5	1769	99	2.15645e-06	0.000318855	1.0,1.0	0.725,0.245	0.515
ENSG00000238105	GOLGA2P5	chr12	-	100157164	100157739	100157164	100157256	100157527	100157739	925	4,7	0,0	3,7	2,2	370	99	8.80819e-05	0.00506199	1.0,1.0	0.286,0.484	0.615
ENSG00000160201	U2AF1	chr21	-	43100452	43104402	43100452	43100519	43104314	43104402	5323	33,22	0,0	52,51	3,2	3894	99	5.65537e-07	0.00011446	1.0,1.0	0.306,0.393	0.65
ENSG00000197121	PGAP1	chr2	-	196847002	196848037	196847002	196847200	196847946	196848037	740	4,4	0,1	0,0	1,4	845	99	0.00610106	0.0989562	1.0,0.319	0.0,0.0	0.659
ENSG00000111801	BTN3A3	chr6	+	26448247	26448754	26448247	26448448	26448727	26448754	5012	1,4	0,0	6,2	2,2	378	99	3.2274e-05	0.00241791	1.0,1.0	0.44,0.208	0.676
ENSG00000281128	PTENP1-AS	chr9	+	33678089	33681073	33678089	33678287	33680893	33681073	1999	20,14	0,0	31,38	2,4	2705	99	6.75342e-09	3.49302e-06	1.0,1.0	0.362,0.258	0.69
ENSG00000174233	ADCY6	chr12	-	48770765	48771973	48770765	48770970	48771709	48771973	3388	11,2	0,0	4,0	1,2	838	99	2.96651e-06	0.000394546	1.0,1.0	0.321,0.0	0.84
ENSG00000168404	MLKL	chr16	-	74674959	74675404	74674959	74675100	74675323	74675404	1029	1,1	0,0	2,0	3,2	322	99	3.675e-10	5.70237e-07	1.0,1.0	0.17,0.0	0.915

## Sheet: A3SS
GeneID	geneSymbol	chr	strand	longExonStart_0base	longExonEnd	shortES	shortEE	flankingES	flankingEE	ID	IJC_SAMPLE_1	SJC_SAMPLE_1	IJC_SAMPLE_2	SJC_SAMPLE_2	IncFormLen	SkipFormLen	PValue	FDR	IncLevel1	IncLevel2	IncLevelDifference
ENSG00000197165	SULT1A2	chr16	-	28592262	28592481	28592262	28592443	28593251	28593346	1211	0,1	1,2	2,4	0,0	137	99	1.09567e-05	0.00252041	0.0,0.265	1.0,1.0	-0.867
ENSG00000183569	SERHL2	chr22	+	42556047	42556083	42556063	42556083	42555663	42555705	544	0,1	1,2	3,4	0,0	115	99	2.29806e-05	0.00393901	0.0,0.301	1.0,1.0	-0.85
ENSG00000217801	AL390719.1	chr1	+	1060276	1060393	1060279	1060393	1059733	1059846	998	0,0	1,1	2,2	0,1	102	99	1.00401e-06	0.000673064	0.0,0.0	1.0,0.66	-0.83
ENSG00000133794	ARNTL	chr11	+	13372162	13372409	13372165	13372409	13369617	13369767	2646	2,0	5,2	6,5	0,1	102	99	1.18706e-06	0.000673064	0.28,0.0	1.0,0.829	-0.774
ENSG00000080823	MOK	chr14	-	102250811	102250990	102250811	102250987	102251755	102251804	2335	0,1	1,4	3,9	0,4	102	99	5.73173e-05	0.00775582	0.0,0.195	1.0,0.686	-0.745
ENSG00000105204	DYRK1B	chr19	-	39826671	39826987	39826671	39826867	39827284	39827425	5768	1,3	1,5	8,9	0,0	219	99	1.08017e-08	1.73479e-05	0.311,0.213	1.0,1.0	-0.738
ENSG00000065717	TLE2	chr19	-	3019282	3019466	3019282	3019463	3019698	3019773	2554	0,0	1,3	4,4	3,1	102	99	3.4017e-09	1.17376e-05	0.0,0.0	0.564,0.795	-0.679
ENSG00000184271	POU6F1	chr12	-	51198549	51198775	51198549	51198686	51199746	51199868	9622	0,0	1,2	8,3	2,1	188	99	1.26791e-06	0.000673064	0.0,0.0	0.678,0.612	-0.645
ENSG00000197530	MIB2	chr1	+	1623388	1623482	1623430	1623482	1616507	1616614	682	0,2	2,3	10,11	5,0	141	99	0.000999657	0.0572391	0.0,0.319	0.584,1.0	-0.633
ENSG00000171045	TSNARE1	chr8	-	142315002	142315092	142315002	142315089	142330900	142330970	10381	0,0	2,5	1,3	1,1	102	99	0.000149041	0.0153512	0.0,0.0	0.493,0.744	-0.619
ENSG00000175575	PAAF1	chr11	+	73886928	73887099	73887039	73887099	73878778	73878819	4900	0,1	2,1	4,8	2,0	210	99	6.6202e-05	0.00846037	0.0,0.32	0.485,1.0	-0.582
ENSG00000131504	DIAPH1	chr5	-	141534334	141534442	141534334	141534433	141571925	141572040	9171	2,0	3,7	4,3	1,1	108	99	0.000241515	0.0203255	0.379,0.0	0.786,0.733	-0.57
ENSG00000247708	STX18-AS1	chr4	+	4649369	4649542	4649372	4649542	4648976	4649109	8043	0,1	4,1	2,5	1,1	102	99	7.57919e-05	0.00934	0.0,0.493	0.66,0.829	-0.498
ENSG00000182473	EXOC7	chr17	-	76090328	76090481	76090328	76090397	76091142	76091235	637	1,2	8,4	9,12	1,9	183	99	0.00107406	0.0597749	0.063,0.213	0.83,0.419	-0.486
ENSG00000204599	TRIM39	chr6	+	30328888	30329041	30328908	30329041	30327651	30327696	5552	1,2	10,4	22,18	10,7	119	99	5.70109e-05	0.00775582	0.077,0.294	0.647,0.681	-0.479
ENSG00000139974	SLC38A6	chr14	+	61078809	61078927	61078829	61078927	61052348	61052985	194	0,1	2,1	3,3	0,4	119	99	0.00160506	0.083282	0.0,0.454	1.0,0.384	-0.465
ENSG00000141013	GAS8	chr16	+	90031175	90031496	90031189	90031496	90027635	90027722	6292	0,1	2,2	2,5	2,2	113	99	0.000809401	0.0489972	0.0,0.305	0.467,0.687	-0.425
ENSG00000164649	CDCA7L	chr7	-	21911616	21911754	21911616	21911751	21916753	21916894	4519	4,3	17,10	16,19	10,10	102	99	3.45389e-05	0.00567508	0.186,0.226	0.608,0.648	-0.422
ENSG00000147789	ZNF7	chr8	+	144829426	144829604	144829444	144829604	144829042	144829090	10818	0,1	4,11	4,6	7,4	117	99	6.21277e-05	0.0080895	0.0,0.071	0.326,0.559	-0.407
ENSG00000233184	AC093157.1	chr1	+	101080886	101083574	101083460	101083574	101080388	101080613	3771	68,77	4,3	231190	2,1	2673	99	0.00198413	0.0971984	0.386,0.487	0.811,0.876	-0.407
ENSG00000243323	PTPRVP	chr1	+	202188826	202188992	202188845	202188992	202187852	202187981	588	4,2	4,1	8,4	1,0	118	99	0.000699416	0.0430952	0.456,0.627	0.87,1.0	-0.394
ENSG00000141503	MINK1	chr17	+	4890221	4890735	4890516	4890735	4889646	4889763	3500	20,37	14,16	146125	12,17	394	99	2.93591e-06	0.00101304	0.264,0.368	0.754,0.649	-0.386
ENSG00000170581	STAT2	chr12	-	56348751	56348851	56348751	56348804	56349344	56349509	11001	7,10	2,7	23,18	0,1	146	99	1.27347e-05	0.0026631	0.704,0.492	1.0,0.924	-0.364
ENSG00000174485	DENND4A	chr15	-	65700543	65700675	65700543	65700672	65701050	65701192	2378	1,1	6,7	15,19	19,18	102	99	0.00135667	0.0725765	0.139,0.122	0.434,0.506	-0.339
ENSG00000249803	AC112178.1	chr5	+	136520649	136521145	136520747	136521145	136520174	136520274	9157	15,13	10,15	70,50	18,10	197	99	0.000414352	0.0286821	0.43,0.303	0.662,0.715	-0.322
ENSG00000180776	ZDHHC20	chr13	-	21381433	21381549	21381433	21381546	21381900	21381994	6007	4,3	3,2	11,4	0,1	102	99	0.000868031	0.0520894	0.564,0.593	1.0,0.795	-0.319
ENSG00000145979	TBC1D7	chr6	-	13326786	13326963	13326786	13326906	13327832	13328130	2920	8,12	3,3	32,43	1,0	156	99	0.000185566	0.016631	0.629,0.717	0.953,1.0	-0.303
ENSG00000153885	KCTD15	chr19	+	33798667	33798766	33798670	33798766	33798336	33798390	3112	0,1	3,5	2,4	3,7	102	99	0.00195481	0.0970514	0.0,0.163	0.393,0.357	-0.293
ENSG00000000419	DPM1	chr20	-	50940864	50940955	50940864	50940933	50941104	50941209	11757	0,1	12,19	8,8	14,18	121	99	6.96612e-06	0.00192293	0.0,0.041	0.319,0.267	-0.273
ENSG00000189077	TMEM120A	chr7	-	75987359	75987428	75987359	75987419	75987717	75987810	3211	10,15	7,2	40,49	0,2	108	99	0.000169833	0.0159549	0.567,0.873	1.0,0.957	-0.258
ENSG00000177225	GATD1	chr11	-	770992	771212	770992	771104	771332	771426	117	21,27	38,34	88111	53,52	207	99	2.25893e-05	0.00393901	0.209,0.275	0.443,0.505	-0.232
ENSG00000157450	RNF111	chr15	+	59092512	59092640	59092536	59092640	59091058	59091154	5202	23,25	45,38	80,73	49,53	123	99	0.000111472	0.0120198	0.291,0.346	0.568,0.526	-0.228
ENSG00000166340	TPP1	chr11	-	6617625	6618915	6617625	6617776	6619195	6619267	4208	150208	2,7	569410	0,0	1238	99	3.43401e-06	0.00112848	0.857,0.704	1.0,1.0	-0.22
ENSG00000182871	COL18A1	chr21	+	45505834	45505966	45505837	45505966	45505357	45505431	10319	0,0	4,8	5,4	18,14	102	99	0.00012056	0.0127998	0.0,0.0	0.212,0.217	-0.214
ENSG00000231527	FAM27C	chr9	+	61920281	61920435	61920302	61920435	61917467	61917607	8123	0,0	2,1	4,5	10,19	120	99	0.000447175	0.0299607	0.0,0.0	0.248,0.178	-0.213
ENSG00000099625	CBARP	chr19	-	1235000	1235342	1235000	1235145	1235500	1235565	5695	0,0	2,5	7,9	7,15	296	99	0.000108132	0.0120069	0.0,0.0	0.251,0.167	-0.209
ENSG00000090554	FLT3LG	chr19	+	49475673	49475801	49475690	49475801	49474602	49474672	11600	0,0	6,11	3,8	22,15	116	99	5.66383e-05	0.00775582	0.0,0.0	0.104,0.313	-0.208
ENSG00000134222	PSRC1	chr1	-	109282679	109282789	109282679	109282736	109283062	109283168	7942	15,23	39,72	68,67	74,64	152	99	1.87132e-05	0.00349026	0.2,0.172	0.374,0.405	-0.204
ENSG00000168502	MTCL1	chr18	+	8818962	8819259	8819046	8819259	8812978	8813233	7197	10,20	0,7	32,17	0,0	183	99	0.00178076	0.0903605	1.0,0.607	1.0,1.0	-0.197
ENSG00000105223	PLD3	chr19	+	40366383	40366510	40366418	40366510	40365717	40365930	2710	20,27	107130	113,80	194150	134	99	7.4993e-07	0.000646908	0.121,0.133	0.301,0.283	-0.165
ENSG00000100211	CBY1	chr22	+	38670766	38670989	38670883	38670989	38668016	38668132	573	12,8	37,27	42,30	50,32	216	99	0.000894624	0.0523204	0.129,0.12	0.278,0.301	-0.165
ENSG00000102878	HSF4	chr16	+	67167460	67167599	67167474	67167599	67167119	67167222	7832	1,1	35,29	5,10	32,25	113	99	0.000199052	0.017611	0.024,0.029	0.12,0.26	-0.164
ENSG00000077463	SIRT6	chr19	-	4175027	4175151	4175027	4175111	4175679	4175760	1628	24,19	6,1	36,43	0,0	139	99	0.000891114	0.0523204	0.74,0.931	1.0,1.0	-0.164
ENSG00000204410	MSH5	chr6	+	31744138	31744299	31744189	31744299	31743903	31744025	2390	29,25	64102	132127	167156	150	99	5.09124e-05	0.00751902	0.23,0.139	0.343,0.35	-0.162
ENSG00000158850	B4GALT3	chr1	-	161175807	161176095	161175807	161176074	161176433	161176579	7592	34,39	84,89	121148	154158	120	99	0.000302799	0.0230325	0.25,0.266	0.393,0.436	-0.156
ENSG00000237298	TTN-AS1	chr2	+	178537360	178537691	178537603	178537691	178535731	178535828	3487	4,6	20,19	33,27	26,38	342	99	0.000676553	0.0424445	0.055,0.084	0.269,0.171	-0.151
ENSG00000137776	SLTM	chr15	-	58899468	58899937	58899468	58899883	58901259	58901287	7649	151138	40,29	256235	24,20	153	99	5.12091e-05	0.00751902	0.71,0.755	0.873,0.884	-0.146
ENSG00000183506	PI4KAP2	chr22	-	21486799	21486975	21486799	21486927	21487564	21487672	8524	26,22	92110	143139	261219	147	99	9.71252e-06	0.00231124	0.16,0.119	0.27,0.299	-0.145
ENSG00000080189	SLC35C2	chr20	-	46355072	46355279	46355072	46355241	46355801	46355874	2587	3,7	64,77	30,29	86,95	137	99	5.5022e-06	0.00158211	0.033,0.062	0.201,0.181	-0.144
ENSG00000058673	ZC3H11A	chr1	+	203802651	203803016	203802956	203803016	203801574	203801628	9580	311327	15,33	690721	21,11	404	99	8.88886e-05	0.0107437	0.836,0.708	0.89,0.941	-0.143
ENSG00000165792	METTL17	chr14	+	20992091	20992205	20992123	20992205	20990463	20990598	10787	71107	180228	234240	317286	131	99	0.000173591	0.0159727	0.23,0.262	0.358,0.388	-0.127
ENSG00000065883	CDK13	chr7	+	40092784	40093237	40092964	40093237	40088125	40088331	4660	26,36	57,70	154117	122138	279	99	0.000545327	0.0355028	0.139,0.154	0.309,0.231	-0.123
ENSG00000061273	HDAC7	chr12	-	47791870	47792669	47791870	47792004	47793368	47793588	1193	145191	66,70	348308	73,78	764	99	0.00190134	0.0950807	0.222,0.261	0.382,0.338	-0.118
ENSG00000100983	GSS	chr20	-	34928472	34929237	34928472	34928951	34929400	34929590	10056	118126	175205	327328	253232	385	99	1.40736e-06	0.000689146	0.148,0.136	0.249,0.267	-0.116
ENSG00000149187	CELF1	chr11	-	47478876	47478952	47478876	47478940	47482694	47482856	5921	91116	23,34	193175	30,15	111	99	0.0018155	0.0914506	0.779,0.753	0.852,0.912	-0.116
ENSG00000137804	NUSAP1	chr15	+	41350987	41351129	41351032	41351129	41349097	41349241	2366	381428	118125	936940	143160	144	99	4.5279e-05	0.0071016	0.689,0.702	0.818,0.802	-0.115
ENSG00000147099	HDAC8	chrX	-	72329567	72330876	72329567	72330076	72351732	72351838	8971	18,25	31,33	55,73	36,28	899	99	0.000158245	0.0156766	0.06,0.077	0.144,0.223	-0.115
ENSG00000100949	RABGGTA	chr14	-	24270836	24270998	24270836	24270947	24271112	24271169	2514	1,3	37,34	13,12	49,48	150	99	0.00105895	0.059413	0.018,0.055	0.149,0.142	-0.109
ENSG00000135632	SMYD5	chr2	+	73219951	73220190	73220050	73220190	73218860	73218969	3902	18,21	79,96	72,60	135118	198	99	0.000353614	0.0254197	0.102,0.099	0.211,0.203	-0.107
ENSG00000112130	RNF8	chr6	+	37368377	37369218	37368483	37369218	37360445	37360574	10612	20,12	66,96	72,57	129123	205	99	0.000152702	0.015497	0.128,0.057	0.212,0.183	-0.105
ENSG00000198931	APRT	chr16	-	88809468	88809840	88809468	88809706	88810069	88810148	2641	9031144	211258	21622101	312299	233	99	0.000456233	0.0302737	0.645,0.653	0.746,0.749	-0.099
ENSG00000087152	ATXN7L3	chr17	-	44196033	44196100	44196033	44196079	44196395	44196418	8061	8,8	81126	57,36	215203	120	99	0.000285894	0.022168	0.075,0.05	0.179,0.128	-0.091
ENSG00000119682	AREL1	chr14	-	74669946	74670142	74669946	74670126	74670761	74670871	2650	1,0	25,40	10,8	72,70	115	99	0.000607806	0.0392006	0.033,0.0	0.107,0.09	-0.082
ENSG00000093010	COMT	chr22	+	19962232	19962815	19962526	19962815	19961198	19961289	6527	84160	194260	398361	393389	393	99	9.38402e-05	0.0109761	0.098,0.134	0.203,0.189	-0.08
ENSG00000137411	VARS2	chr6	+	30922381	30922554	30922449	30922554	30922115	30922241	11006	8,14	99136	48,64	216219	167	99	0.00016991	0.0159549	0.046,0.058	0.116,0.148	-0.08
ENSG00000089053	ANAPC5	chr12	-	121328315	121328497	121328315	121328458	121330582	121330672	11385	386464	49,75	862680	66,43	138	99	0.000225521	0.019454	0.85,0.816	0.904,0.919	-0.079
ENSG00000115368	WDR75	chr2	+	189449244	189450968	189450902	189450968	189448378	189448508	2902	201214	210243	1017978	391428	1757	99	2.84167e-11	1.96104e-07	0.051,0.047	0.128,0.114	-0.072
ENSG00000198231	DDX42	chr17	+	63805043	63805175	63805070	63805175	63800467	63800617	11621	15,23	227228	77,84	419417	126	99	0.000262688	0.0210792	0.049,0.073	0.126,0.137	-0.071
ENSG00000266173	STRADA	chr17	-	63704483	63704908	63704483	63704582	63706634	63706739	7281	4,4	25,32	27,23	47,56	425	99	0.0017524	0.0902488	0.036,0.028	0.118,0.087	-0.07
ENSG00000121716	PILRB	chr7	+	100356393	100356883	100356749	100356883	100355142	100355240	8118	56,54	152119	245192	266277	455	99	0.00025035	0.0208152	0.074,0.09	0.167,0.131	-0.067
ENSG00000175061	SNHG29	chr17	+	16441073	16442018	16441367	16442018	16440184	16440253	2502	20292321	58,73	54534505	69,67	393	99	7.10034e-05	0.00890899	0.898,0.889	0.952,0.944	-0.054
ENSG00000170421	KRT8	chr12	-	52904657	52905079	52904657	52905027	52949455	52949842	5962	365588	3,7	678496	31,24	151	99	4.20795e-05	0.00675328	0.988,0.982	0.935,0.931	0.052
ENSG00000111321	LTBR	chr12	+	6385021	6385147	6385036	6385147	6384587	6384684	5841	110114	0,1	260247	20,9	114	99	0.000285646	0.022168	1.0,0.99	0.919,0.96	0.055
ENSG00000115163	CENPA	chr2	+	26792501	26792833	26792755	26792833	26792130	26792240	6964	32,47	53,73	32,27	137126	353	99	6.10662e-05	0.0080895	0.145,0.153	0.061,0.057	0.09
ENSG00000104960	PTOV1	chr19	+	49860565	49860740	49860613	49860740	49860267	49860336	1064	35,31	96111	27,51	287266	147	99	0.000804378	0.0489972	0.197,0.158	0.06,0.114	0.09
ENSG00000106628	POLD2	chr7	-	44121833	44122195	44121833	44122109	44123510	44123559	801	99129	163146	160149	372364	185	99	0.00134548	0.0725401	0.245,0.321	0.187,0.18	0.1
ENSG00000105889	STEAP1B	chr7	-	22493323	22493836	22493323	22493779	22494771	22494886	1405	67,40	1,2	92101	9,15	156	99	0.00152617	0.0797887	0.977,0.927	0.866,0.81	0.114
ENSG00000148200	NR6A1	chr9	-	124554327	124554570	124554327	124554558	124733307	124733349	3246	27,28	1,0	38,39	6,5	111	99	0.00100361	0.0572391	0.96,1.0	0.85,0.874	0.118
ENSG00000284946	AC068831.8	chr15	-	90980883	90981669	90980883	90981033	90981747	90981981	5448	578630	0,8	13991120	35,31	735	99	4.92654e-05	0.00751902	1.0,0.914	0.843,0.83	0.121
ENSG00000127616	SMARCA4	chr19	+	11041297	11041560	11041306	11041560	11034913	11035132	4994	79,83	150153	108,91	349344	108	99	0.000415218	0.0286821	0.326,0.332	0.221,0.195	0.121
ENSG00000215021	PHB2	chr12	-	6967170	6967335	6967170	6967238	6967891	6968021	7569	137170	3,6	321308	36,33	196	99	5.59348e-05	0.00775582	0.958,0.935	0.818,0.825	0.125
ENSG00000139746	RBM26	chr13	-	79365577	79365733	79365577	79365718	79366054	79366195	8779	22,31	61,61	33,30	184147	114	99	0.00177685	0.0903605	0.239,0.306	0.135,0.151	0.129
ENSG00000229140	CCDC26	chr8	-	129216466	129217406	129216466	129216984	129223220	129223369	9140	90120	0,0	169120	9,1	521	99	9.02959e-05	0.0107437	1.0,1.0	0.781,0.958	0.131
ENSG00000148444	COMMD3	chr10	+	22318352	22318713	22318652	22318713	22318104	22318168	5031	64,55	0,0	128167	9,2	399	99	0.000350305	0.0254197	1.0,1.0	0.779,0.954	0.133
ENSG00000143499	SMYD2	chr1	+	214330949	214334308	214334199	214334308	214330167	214330278	8601	572670	1,0	14041252	8,7	3349	99	0.000347072	0.0254197	0.944,1.0	0.838,0.841	0.133
ENSG00000164306	PRIMPOL	chr4	+	184685408	184685498	184685411	184685498	184682247	184682336	7597	19,26	0,0	25,30	7,2	102	99	0.000359497	0.0255762	1.0,1.0	0.776,0.936	0.144
ENSG00000111752	PHC1	chr12	+	8922632	8922788	8922656	8922788	8921600	8921750	5793	15,17	0,0	46,31	4,6	123	99	0.000167833	0.0159549	1.0,1.0	0.902,0.806	0.146
ENSG00000123992	DNPEP	chr2	-	219386891	219386980	219386891	219386948	219387069	219387163	10620	105127	14,13	177151	54,43	131	99	0.000221014	0.0193065	0.85,0.881	0.712,0.726	0.146
ENSG00000123191	ATP7B	chr13	-	51958310	51958544	51958310	51958400	51960147	51960322	8780	55,77	0,0	124,74	9,6	243	99	1.42666e-05	0.0028957	1.0,1.0	0.849,0.834	0.159
ENSG00000137760	ALKBH8	chr11	-	107553846	107553978	107553846	107553973	107556765	107557003	10387	18,25	2,1	46,43	17,12	104	99	0.00104105	0.0588876	0.895,0.96	0.72,0.773	0.181
ENSG00000160058	BSDC1	chr1	-	32383829	32384048	32383829	32383997	32394079	32394140	203	11,14	0,0	33,26	5,4	150	99	0.000171086	0.0159549	1.0,1.0	0.813,0.811	0.188
ENSG00000167491	GATAD2A	chr19	+	19465339	19465614	19465344	19465614	19457111	19457229	1149	20,18	0,1	23,19	6,5	104	99	0.000176543	0.0160306	1.0,0.945	0.785,0.783	0.188
ENSG00000234593	KAZN-AS1	chr1	-	14390685	14390751	14390685	14390744	14391458	14391578	6778	4,6	0,0	29,17	4,6	106	99	0.000128297	0.0134148	1.0,1.0	0.871,0.726	0.202
ENSG00000113240	CLK4	chr5	-	178619837	178620673	178619837	178619896	178622392	178622459	410	30,33	0,0	95,74	5,1	876	99	0.000642906	0.0407036	1.0,1.0	0.682,0.893	0.212
ENSG00000173517	PEAK1	chr15	-	77284957	77285078	77284957	77285055	77286422	77286504	8479	6,5	0,0	15,21	4,4	122	99	0.000256854	0.0208535	1.0,1.0	0.753,0.81	0.218
ENSG00000006015	REX1BD	chr19	+	18589412	18589683	18589478	18589683	18588994	18589077	7613	8,13	0,0	22,16	6,2	165	99	1.61291e-05	0.00309186	1.0,1.0	0.688,0.828	0.242
ENSG00000226688	ENTPD1-AS1	chr10	-	95904829	95904938	95904829	95904935	95907777	95907903	7765	12,3	0,0	11,11	3,4	102	99	0.000272044	0.021579	1.0,1.0	0.781,0.727	0.246
ENSG00000083544	TDRD3	chr13	+	60444682	60444748	60444686	60444748	60439687	60439772	11152	12,6	0,0	19,16	5,7	103	99	1.58565e-05	0.00309186	1.0,1.0	0.785,0.687	0.264
ENSG00000197045	GMFB	chr14	-	54480873	54480962	54480873	54480941	54481325	54481458	850	7,6	0,0	15,7	1,5	120	99	0.0020367	0.0982888	1.0,1.0	0.925,0.536	0.269
ENSG00000135365	PHF21A	chr11	-	45935120	45935246	45935120	45935157	45935635	45935739	8400	10,8	0,0	18,14	8,1	188	99	8.88524e-06	0.002271	1.0,1.0	0.542,0.881	0.288
ENSG00000168679	SLC16A4	chr1	-	110362850	110363913	110362850	110363893	110375457	110375551	4832	8,8	0,0	7,16	6,1	119	99	0.000917686	0.0532181	1.0,1.0	0.493,0.93	0.288
ENSG00000138674	SEC31A	chr4	-	82881857	82881940	82881857	82881937	82890750	82891095	6959	4,4	0,0	18,7	1,9	102	99	0.000624972	0.0399345	1.0,1.0	0.946,0.43	0.312
ENSG00000170919	TPT1-AS1	chr13	+	45369958	45370182	45370079	45370182	45344328	45344446	7799	15,22	0,0	43,30	11,5	220	99	2.78572e-06	0.00101304	1.0,1.0	0.638,0.73	0.316
ENSG00000166793	YPEL4	chr11	-	57646296	57646794	57646296	57646405	57646966	57647291	10746	11,11	0,0	26,37	3,3	488	99	0.000108321	0.0120069	1.0,1.0	0.637,0.714	0.325
ENSG00000168778	TCTN2	chr12	+	123673614	123673810	123673617	123673810	123672055	123672132	9574	6,5	1,0	11,5	6,5	102	99	0.000303718	0.0230325	0.853,1.0	0.64,0.493	0.36
ENSG00000285637	AL161449.2	chr9	-	13003434	13003622	13003434	13003617	13004932	13005304	11078	2,1	1,0	4,3	7,3	104	99	0.00203472	0.0982888	0.656,1.0	0.352,0.488	0.408
ENSG00000160838	LRRC71	chr1	+	156927184	156927270	156927201	156927270	156924937	156925015	1800	3,1	0,0	6,3	2,3	116	99	0.000445641	0.0299607	1.0,1.0	0.719,0.46	0.41
ENSG00000178295	GEN1	chr2	+	17759911	17760104	17759928	17760104	17753857	17753967	7013	1,3	0,1	15,4	8,9	116	99	0.00198594	0.0971984	1.0,0.719	0.615,0.275	0.414
ENSG00000105393	BABAM1	chr19	+	17275776	17275825	17275788	17275825	17274106	17274185	9159	2,3	0,0	2,5	1,4	111	99	0.000159015	0.0156766	1.0,1.0	0.641,0.527	0.416
ENSG00000068745	IP6K2	chr3	-	48695089	48695421	48695089	48695418	48708119	48708237	8576	4,13	1,2	4,8	7,9	102	99	0.000697776	0.0430952	0.795,0.863	0.357,0.463	0.419
ENSG00000099330	OCEL1	chr19	+	17226974	17227199	17226993	17227199	17226692	17226869	4927	6,12	0,2	14,4	8,5	118	99	0.00111794	0.0617191	1.0,0.834	0.595,0.402	0.419
ENSG00000213983	AP1G2	chr14	-	23567110	23567319	23567110	23567315	23567450	23567524	4703	6,4	1,0	2,5	3,4	103	99	0.000254974	0.0208535	0.852,1.0	0.391,0.546	0.457
ENSG00000238105	GOLGA2P5	chr12	-	100157164	100157445	100157164	100157256	100157527	100157739	1521	5,8	0,0	6,8	2,2	288	99	0.000314383	0.0235821	1.0,1.0	0.508,0.579	0.457
ENSG00000235703	LINC00894	chrX	+	149945783	149947347	149945857	149947347	149944017	149944100	2082	4,8	2,4	2,2	19,15	173	99	1.20439e-05	0.0026631	0.534,0.534	0.057,0.071	0.47
ENSG00000142046	TMEM91	chr19	+	41383560	41384083	41383885	41384083	41382771	41382921	4886	10,11	0,0	21,11	5,2	424	99	4.64102e-06	0.0014558	1.0,1.0	0.495,0.562	0.472
ENSG00000106258	CYP3A5	chr7	-	99672579	99672915	99672579	99672679	99674532	99674585	380	2,3	0,0	17,16	5,4	335	99	9.30451e-06	0.00229323	1.0,1.0	0.501,0.542	0.478
ENSG00000153391	INO80C	chr18	-	35487385	35487823	35487385	35487439	35489331	35489385	3463	12,3	1,0	30,26	16,6	483	99	0.000886737	0.0523204	0.711,1.0	0.278,0.47	0.481
ENSG00000214413	BBIP1	chr10	-	110901025	110901279	110901025	110901122	110901537	110901612	3028	4,4	0,0	14,12	5,6	256	99	1.1982e-06	0.000673064	1.0,1.0	0.52,0.436	0.522
ENSG00000073849	ST6GAL1	chr3	+	187038391	187038491	187038394	187038491	186963784	186963926	10188	1,2	0,0	3,1	2,2	102	99	0.00142673	0.0751592	1.0,1.0	0.593,0.327	0.54
ENSG00000161265	U2AF1L4	chr19	-	35743154	35743208	35743154	35743205	35743295	35743345	4335	3,1	1,0	2,0	1,3	102	99	0.000230861	0.0196688	0.744,1.0	0.66,0.0	0.542
ENSG00000170949	ZNF160	chr19	-	53091412	53091553	53091412	53091529	53091636	53091720	6849	2,3	0,1	4,2	5,6	123	99	0.000324216	0.0240583	1.0,0.707	0.392,0.212	0.551
ENSG00000049769	PPP1R3F	chrX	+	49281980	49282063	49281983	49282063	49281405	49281461	6642	1,4	0,1	4,0	2,5	102	99	0.000415623	0.0286821	1.0,0.795	0.66,0.0	0.567
ENSG00000147642	SYBU	chr8	-	109642727	109642947	109642727	109642929	109644635	109644716	1238	1,2	1,0	0,1	2,2	117	99	0.000109612	0.0120069	0.458,1.0	0.0,0.297	0.581
ENSG00000213918	DNASE1	chr16	+	3656963	3657111	3656998	3657111	3656637	3656753	9916	7,10	1,2	5,3	13,18	134	99	3.1383e-07	0.000360956	0.838,0.787	0.221,0.11	0.647
ENSG00000186951	PPARA	chr22	+	46198341	46198591	46198344	46198591	46188722	46188822	9688	1,4	0,0	1,0	4,1	102	99	1.25691e-08	1.73479e-05	1.0,1.0	0.195,0.0	0.902
ENSG00000245573	BDNF-AS	chr11	+	27658237	27658462	27658240	27658462	27639844	27640005	5165	2,1	0,0	0,0	2,1	102	99	5.84827e-09	1.3453e-05	1.0,1.0	0.0,0.0	1

## Sheet: A5SS
GeneID	geneSymbol	chr	strand	longExonStart_0base	longExonEnd	shortES	shortEE	flankingES	flankingEE	ID	IJC_SAMPLE_1	SJC_SAMPLE_1	IJC_SAMPLE_2	SJC_SAMPLE_2	IncFormLen	SkipFormLen	PValue	FDR	IncLevel1	IncLevel2	IncLevelDifference
ENSG00000152763	WDR78	chr1	-	66890182	66891266	66891153	66891266	66871369	66871509	4953	0,2	1,3	2,6	0,0	1070	99	3.645e-09	4.20633e-06	0.0,0.058	1.0,1.0	-0.971
ENSG00000287688	AC011317.1	chr3	-	150736341	150736515	150736350	150736515	150734469	150734864	416	0,0	2,2	2,1	1,0	108	99	6.28357e-05	0.0107426	0.0,0.0	0.647,1.0	-0.824
ENSG00000147535	PLPP5	chr8	-	38268822	38268990	38268881	38268990	38268370	38268461	5187	1,0	1,1	2,2	0,0	158	99	0.000558466	0.0572862	0.385,0.0	1.0,1.0	-0.807
ENSG00000163608	NEPRO	chr3	-	113013948	113014032	113013952	113014032	113011044	113011165	7035	1,0	1,2	2,1	0,0	103	99	4.40832e-05	0.00883086	0.49,0.0	1.0,1.0	-0.755
ENSG00000156650	KAT6B	chr10	+	74981786	74985241	74981786	74981928	74989018	74989112	2560	11,13	1,2	47,32	1,0	3412	99	0.000321323	0.0412007	0.242,0.159	0.577,1.0	-0.588
ENSG00000167995	BEST1	chr11	+	61958145	61958501	61958145	61958298	61959497	61959578	4208	0,0	1,1	6,5	2,1	302	99	1.69261e-06	0.000590215	0.0,0.0	0.496,0.621	-0.558
ENSG00000164970	FAM219A	chr9	-	34405864	34405964	34405915	34405964	34402704	34402807	7077	1,4	5,7	23,16	4,8	150	99	0.000638751	0.0593941	0.117,0.274	0.791,0.569	-0.484
ENSG00000153310	CYRIB	chr8	-	129896671	129896854	129896748	129896854	129879388	129879471	6316	1,0	2,3	9,1	1,3	176	99	0.00186656	0.0990351	0.22,0.0	0.835,0.158	-0.387
ENSG00000138496	PARP9	chr3	-	122558328	122558467	122558433	122558467	122555285	122556121	6136	0,0	2,1	5,2	7,1	204	99	0.00019942	0.0287664	0.0,0.0	0.257,0.493	-0.375
ENSG00000108465	CDK5RAP3	chr17	+	47973518	47973696	47973518	47973693	47973930	47974031	422	1,1	8,13	5,7	10,8	102	99	0.00133298	0.0820403	0.108,0.069	0.327,0.459	-0.304
ENSG00000165240	ATP7A	chrX	+	77922998	77923052	77922998	77923042	77971620	77971761	3721	0,0	5,3	3,3	4,12	109	99	0.000744937	0.0648798	0.0,0.0	0.405,0.185	-0.295
ENSG00000130529	TRPM4	chr19	+	49182577	49182922	49182577	49182867	49183077	49183212	7647	8,15	4,3	12,18	1,0	154	99	0.000524996	0.0550769	0.563,0.763	0.885,1.0	-0.279
ENSG00000167280	ENGASE	chr17	+	79081897	79082877	79081897	79082063	79083019	79083123	1687	116113	25,21	487372	31,28	913	99	1.03111e-05	0.00279978	0.335,0.368	0.63,0.59	-0.258
ENSG00000159086	PAXBP1	chr21	-	32755212	32755353	32755229	32755353	32751118	32751218	2383	39,44	44,67	177126	66,75	116	99	8.83371e-06	0.00254853	0.431,0.359	0.696,0.589	-0.247
ENSG00000138286	FAM149B1	chr10	+	73232938	73233197	73232938	73233163	73234816	73234940	361	6,1	19,20	24,17	29,25	133	99	0.000781926	0.0663899	0.19,0.036	0.381,0.336	-0.246
ENSG00000105655	ISYNA1	chr19	-	18437598	18437988	18437859	18437988	18436972	18437105	7353	25,67	6,1	107,82	0,1	360	99	0.0013046	0.0820403	0.534,0.949	1.0,0.958	-0.237
ENSG00000090013	BLVRB	chr19	-	40457498	40458244	40458173	40458244	40451363	40451492	4662	128164	25,25	355347	32,17	774	99	0.00110282	0.0758137	0.396,0.456	0.587,0.723	-0.229
ENSG00000226067	LINC00623	chr1	+	120952438	120952785	120952438	120952625	120953219	120953463	2470	15,21	2,3	33,37	1,0	259	99	0.00178207	0.0971209	0.741,0.728	0.927,1.0	-0.229
ENSG00000117308	GALE	chr1	-	23796508	23796782	23796696	23796782	23796150	23796265	4835	178216	29,31	260284	11,7	287	99	4.47243e-08	3.44079e-05	0.679,0.706	0.891,0.933	-0.22
ENSG00000215041	NEURL4	chr17	-	7322947	7323123	7322953	7323123	7322734	7322866	6555	26,30	14,17	98121	17,27	105	99	0.00156703	0.0915321	0.636,0.625	0.845,0.809	-0.196
ENSG00000206573	THUMPD3-AS1	chr3	-	9391426	9391826	9391678	9391826	9388873	9390497	5964	206290	26,29	622576	20,14	351	99	7.93417e-08	5.23202e-05	0.691,0.738	0.898,0.921	-0.195
ENSG00000124155	PIGT	chr20	+	45420527	45421583	45420527	45420693	45424215	45424381	142	317360	9,17	797704	11,6	989	99	0.0006064	0.0584817	0.779,0.679	0.879,0.922	-0.171
ENSG00000123154	WDR83	chr19	+	12669976	12670097	12669976	12670080	12670179	12670285	7427	15,20	2,5	33,43	1,0	116	99	0.000861999	0.0676326	0.865,0.773	0.966,1.0	-0.164
ENSG00000197037	ZSCAN25	chr7	+	99619560	99619997	99619560	99619993	99621372	99621574	7851	1,0	29,37	9,18	58,73	103	99	7.69583e-06	0.00236826	0.032,0.0	0.13,0.192	-0.145
ENSG00000105486	LIG1	chr19	-	48120166	48121322	48121169	48121322	48119136	48119190	94	188243	40,40	802691	77,74	1102	99	0.00149371	0.0906946	0.297,0.353	0.483,0.456	-0.145
ENSG00000125458	NT5C	chr17	-	75130964	75131281	75131180	75131281	75130752	75130867	5378	89,78	5,6	187207	3,1	315	99	0.00117991	0.0783628	0.848,0.803	0.951,0.985	-0.142
ENSG00000163703	CRELD1	chr3	+	9943076	9943253	9943076	9943172	9943380	9943515	5659	9,11	35,62	69,42	100,91	180	99	0.000299538	0.0406667	0.124,0.089	0.275,0.202	-0.132
ENSG00000140521	POLG	chr15	-	89317938	89318749	89318540	89318749	89317375	89317536	6023	90123	78,74	283330	131,92	701	99	0.000805423	0.0663899	0.14,0.19	0.234,0.336	-0.12
ENSG00000135506	OS9	chr12	+	57718992	57720263	57718992	57719182	57720405	57720518	6156	275301	78103	794705	151115	1180	99	0.000372957	0.0441428	0.228,0.197	0.306,0.34	-0.11
ENSG00000141556	TBCD	chr17	+	82932657	82932855	82932657	82932735	82937270	82937360	5177	1,3	40,54	23,25	86109	219	99	4.59144e-05	0.00883086	0.011,0.024	0.108,0.094	-0.084
ENSG00000169045	HNRNPH1	chr5	-	179616868	179617110	179617020	179617110	179616125	179616218	2343	12481335	68,79	32613857	75,91	251	99	9.27774e-07	0.000389328	0.879,0.87	0.945,0.944	-0.07
ENSG00000108591	DRG2	chr17	+	18099016	18099093	18099016	18099077	18099632	18100435	2129	1,0	60,50	7,10	79105	115	99	0.00101284	0.073051	0.014,0.0	0.071,0.076	-0.066
ENSG00000180228	PRKRA	chr2	-	178447455	178447586	178447504	178447586	178444421	178444500	986	1,4	134157	14,27	198187	148	99	3.53069e-05	0.00740802	0.005,0.017	0.045,0.088	-0.056
ENSG00000070010	UFD1	chr22	-	19475469	19475602	19475495	19475602	19475067	19475100	848	10191314	82106	21952030	311300	125	99	0.000154814	0.0246421	0.908,0.908	0.848,0.843	0.063
ENSG00000183291	SELENOF	chr1	-	86914027	86914424	86914314	86914424	86903280	86903448	5071	540677	6,9	1074938	41,25	386	99	0.00151289	0.0906946	0.958,0.951	0.87,0.906	0.066
ENSG00000132323	ILKAP	chr2	-	238189852	238189972	238189862	238189972	238188130	238188257	6737	80,71	2,1	154147	16,11	109	99	0.00158635	0.0915321	0.973,0.985	0.897,0.924	0.068
ENSG00000142541	RPL13A	chr19	+	49489849	49490090	49489849	49489912	49490231	49490297	1285	100127	141183	251245	641598	277	99	0.000864454	0.0676326	0.202,0.199	0.123,0.128	0.075
ENSG00000196756	SNHG17	chr20	-	38422086	38422241	38422095	38422241	38421005	38421098	1950	38,35	1,0	51,79	8,6	108	99	0.000881473	0.0678146	0.972,1.0	0.854,0.923	0.097
ENSG00000108384	RAD51C	chr17	+	58692572	58692788	58692572	58692685	58694930	58695189	926	279283	19,12	377339	41,45	202	99	0.00168976	0.093975	0.878,0.92	0.818,0.787	0.097
ENSG00000270647	TAF15	chr17	+	35820163	35820248	35820163	35820239	35820331	35820437	1139	666752	98113	12031133	336356	108	99	1.43869e-06	0.000553417	0.862,0.859	0.766,0.745	0.105
ENSG00000100139	MICALL1	chr22	+	37927410	37927826	37927410	37927820	37931798	37931933	688	12,24	0,0	40,49	2,10	105	99	0.000417668	0.0481989	1.0,1.0	0.95,0.822	0.114
ENSG00000163660	CCNL1	chr3	-	157151728	157151930	157151916	157151930	157150281	157150381	3521	122130	0,0	337266	20,10	287	99	1.79008e-06	0.000590215	1.0,1.0	0.853,0.902	0.123
ENSG00000137871	ZNF280D	chr15	-	56666678	56666986	56666799	56666986	56666394	56666535	2394	27,33	1,0	60,48	6,5	220	99	0.00094913	0.0718227	0.924,1.0	0.818,0.812	0.147
ENSG00000176261	ZBTB8OS	chr1	-	32650401	32650525	32650432	32650525	32631826	32631879	7318	11,15	0,0	28,31	6,2	130	99	0.00065455	0.0593941	1.0,1.0	0.78,0.922	0.149
ENSG00000169490	TM2D2	chr8	-	38996212	38996509	38996418	38996509	38995317	38995405	7738	58,89	2,2	157139	16,15	305	99	0.00161997	0.0923186	0.904,0.935	0.761,0.75	0.164
ENSG00000141030	COPS3	chr17	-	17270757	17271008	17270895	17271008	17267884	17268045	2201	8,7	0,0	33,28	4,2	237	99	0.00181688	0.0975201	1.0,1.0	0.775,0.854	0.185
ENSG00000140416	TPM1	chr15	+	63064063	63064190	63064063	63064142	63065895	63066093	127	9,4	0,0	18,12	5,1	147	99	0.00108959	0.0758137	1.0,1.0	0.708,0.89	0.201
ENSG00000276550	HERC2P2	chr15	+	22561558	22561934	22561558	22561789	22562642	22562731	6263	27,16	1,0	55,36	3,9	244	99	0.000967416	0.0720256	0.916,1.0	0.881,0.619	0.208
ENSG00000110080	ST3GAL4	chr11	+	126406472	126406557	126406472	126406545	126406942	126407023	1821	9,13	0,0	39,22	8,6	111	99	6.06131e-05	0.0107426	1.0,1.0	0.813,0.766	0.211
ENSG00000110583	NAA40	chr11	+	63945839	63947003	63945839	63945935	63952237	63952333	2403	262273	1,5	348371	15,14	1167	99	0.0017884	0.0971209	0.957,0.822	0.663,0.692	0.212
ENSG00000143420	ENSA	chr1	-	150627311	150627592	150627466	150627592	150626478	150626526	5254	67,66	14,18	87,77	39,61	254	99	0.00157627	0.0915321	0.651,0.588	0.465,0.33	0.222
ENSG00000146094	DOK3	chr5	-	177509757	177509857	177509801	177509857	177509474	177509657	7000	4,5	0,0	23,22	4,5	143	99	0.000215463	0.0301387	1.0,1.0	0.799,0.753	0.224
ENSG00000260565	ERVK13-1	chr16	-	2671023	2672570	2671344	2672570	2669410	2669561	6322	19,21	0,1	40,33	3,5	420	99	0.00165092	0.0929346	1.0,0.832	0.759,0.609	0.232
ENSG00000196378	ZNF34	chr8	-	144780227	144780280	144780231	144780280	144778438	144778525	7402	3,14	0,0	15,7	3,3	103	99	0.00109463	0.0758137	1.0,1.0	0.828,0.692	0.24
ENSG00000101294	HM13	chr20	+	31538178	31538554	31538178	31538359	31544946	31545035	7442	20,23	0,0	31,32	4,3	294	99	0.000168141	0.0258713	1.0,1.0	0.723,0.782	0.248
ENSG00000105298	CACTIN	chr19	-	3614385	3614589	3614396	3614589	3613463	3613586	3519	2,5	5,13	0,0	31,22	110	99	5.33495e-05	0.00985046	0.265,0.257	0.0,0.0	0.261
ENSG00000163714	U2SURP	chr3	+	143028339	143028410	143028339	143028406	143028486	143028646	2029	3,2	0,0	6,11	2,4	103	99	0.000656217	0.0593941	1.0,1.0	0.742,0.726	0.266
ENSG00000197062	ZSCAN26	chr6	+	28271853	28272339	28271853	28272336	28272669	28272787	3943	8,7	1,0	6,6	2,4	102	99	0.00132649	0.0820403	0.886,1.0	0.744,0.593	0.275
ENSG00000237978	KCNMB2-AS1	chr3	-	178749045	178749236	178749109	178749236	178748403	178748485	6696	19,15	2,0	30,27	11,9	163	99	0.00045245	0.0497264	0.852,1.0	0.624,0.646	0.291
ENSG00000110171	TRIM3	chr11	-	6458064	6458296	6458069	6458296	6457695	6457847	780	2,1	0,0	7,5	3,2	104	99	0.00111684	0.0758137	1.0,1.0	0.69,0.704	0.303
ENSG00000196576	PLXNB2	chr22	-	50294718	50294778	50294725	50294778	50289516	50290597	18	2,4	0,0	5,10	4,2	106	99	0.00036227	0.0441428	1.0,1.0	0.539,0.824	0.319
ENSG00000149262	INTS4	chr11	-	77987528	77987698	77987603	77987698	77981458	77981576	7552	4,15	0,0	15,12	4,4	174	99	1.25161e-05	0.00320968	1.0,1.0	0.681,0.631	0.344
ENSG00000147121	KRBOX4	chrX	+	46463197	46463308	46463197	46463293	46471141	46471185	2531	6,5	0,1	6,12	7,5	114	99	0.000370883	0.0441428	1.0,0.813	0.427,0.676	0.355
ENSG00000132950	ZMYM5	chr13	-	19851354	19852190	19851688	19852190	19835476	19835689	7398	7,7	0,0	20,21	2,4	433	99	1.73199e-05	0.00399744	1.0,1.0	0.696,0.546	0.379
ENSG00000123415	SMUG1	chr12	-	54188510	54188596	54188514	54188596	54187818	54187905	3294	3,2	0,1	7,2	7,3	103	99	0.000989853	0.0725264	1.0,0.658	0.49,0.391	0.388
ENSG00000141279	NPEPPS	chr17	+	47579389	47582849	47579389	47579511	47585499	47585700	3044	66,73	1,0	147148	6,5	3437	99	0.000839586	0.0676326	0.655,1.0	0.414,0.46	0.391
ENSG00000234593	KAZN-AS1	chr1	-	14391444	14391578	14391458	14391578	14390685	14390744	4665	1,3	0,0	7,8	4,6	113	99	1.43418e-05	0.0034843	1.0,1.0	0.605,0.539	0.428
ENSG00000159459	UBR1	chr15	-	43025373	43026663	43026560	43026663	43024828	43024983	3469	22,13	0,0	26,22	3,1	1286	99	0.000313358	0.0412007	1.0,1.0	0.4,0.629	0.486
ENSG00000230606	AC092683.1	chr2	-	97423788	97423918	97423801	97423918	97423176	97423272	2468	1,1	0,0	2,2	1,3	112	99	0.00118834	0.0783628	1.0,1.0	0.639,0.371	0.495
ENSG00000068137	PLEKHH3	chr17	-	42669917	42670376	42669942	42670376	42669429	42669621	4130	7,9	0,0	3,6	4,3	124	99	7.88164e-07	0.000363817	1.0,1.0	0.375,0.615	0.505
ENSG00000157036	EXOG	chr3	+	38497628	38497689	38497628	38497684	38498925	38498989	4294	3,1	0,0	5,3	9,2	104	99	4.4434e-08	3.44079e-05	1.0,1.0	0.346,0.588	0.533
ENSG00000130414	NDUFA10	chr2	-	240018523	240018639	240018552	240018639	240017814	240017905	7434	7,4	0,0	1,3	1,3	128	99	7.77392e-05	0.0128159	1.0,1.0	0.436,0.436	0.564
ENSG00000167528	ZNF641	chr12	-	48347148	48347343	48347251	48347343	48344598	48344712	4555	1,4	0,0	1,7	1,3	202	99	0.000795768	0.0663899	1.0,1.0	0.329,0.533	0.569
ENSG00000234684	SDCBP2-AS1	chr20	+	1325420	1325782	1325420	1325529	1373077	1373178	3870	4,4	0,0	13,7	7,2	352	99	3.54062e-09	4.20633e-06	1.0,1.0	0.343,0.496	0.581
ENSG00000247498	GPRC5D-AS1	chr12	+	12966758	12966897	12966758	12966857	12979523	12979622	4729	1,3	0,1	1,4	3,9	139	99	0.000608129	0.0584817	1.0,0.681	0.192,0.24	0.625
ENSG00000142920	AZIN2	chr1	+	33082177	33083142	33082177	33082354	33083953	33084127	1153	4,2	0,0	6,2	2,2	887	99	2.20429e-07	0.000117159	1.0,1.0	0.251,0.1	0.825
ENSG00000166743	ACSM1	chr16	-	20636738	20637451	20637370	20637451	20627255	20627316	4859	4,2	0,0	4,4	2,4	731	99	5.43783e-10	2.5101e-06	1.0,1.0	0.213,0.119	0.834
ENSG00000111731	C2CD5	chr12	-	22519039	22519239	22519114	22519239	22518095	22518137	4085	3,1	0,0	0,0	1,3	174	99	1.10447e-09	2.54911e-06	1.0,1.0	0.0,0.0	1

## Sheet: MXE
GeneID	geneSymbol	chr	strand	1stExonStart_0base	1stExonEnd	2ndExonStart_0base	2ndExonEnd	upstreamES	upstreamEE	downstreamES	downstreamEE	ID	IJC_SAMPLE_1	SJC_SAMPLE_1	IJC_SAMPLE_2	SJC_SAMPLE_2	IncFormLen	SkipFormLen	PValue	FDR	IncLevel1	IncLevel2	IncLevelDifference
ENSG00000256128	LINC00944	chr12	-	126763414	126763498	126770192	126770254	126760931	126761057	126772078	126772259	322	0,0	2,1	3,2	1,0	161	183	6.61817e-09	1.66606e-05	0.0,0.0	0.773,1.0	-0.887
ENSG00000176261	ZBTB8OS	chr1	-	32632207	32632345	32633261	32633354	32627507	32627544	32633644	32633727	13783	0,0	2,2	4,2	0,1	192	237	1.39473e-10	1.75555e-06	0.0,0.0	1.0,0.712	-0.856
ENSG00000089123	TASP1	chr20	-	13600542	13600617	13616856	13617123	13587249	13587370	13623445	13623514	645	0,5	1,3	9,7	0,0	366	174	0.000164323	0.0397756	0.0,0.442	1.0,1.0	-0.779
ENSG00000234911	TEX21P	chr14	-	64347522	64347648	64353952	64354074	64346134	64346428	64354720	64354922	13333	0,0	4,3	5,3	2,2	221	225	3.99359e-08	6.28341e-05	0.0,0.0	0.718,0.604	-0.661
ENSG00000107104	KANK1	chr9	+	540507	540667	549106	549721	504694	504754	676889	677009	8553	0,0	3,4	1,3	5,4	259	714	0.000397485	0.0685361	0.0,0.0	0.355,0.674	-0.514
ENSG00000186409	CCDC30	chr1	+	42473121	42473303	42480460	42480566	42463285	42463657	42482662	42482816	500	0,1	1,4	4,3	1,3	281	205	0.000490515	0.0774415	0.0,0.154	0.745,0.422	-0.507
ENSG00000088367	EPB41L1	chr20	+	36214359	36214440	36218875	36218962	36212271	36212376	36221863	36221944	11087	0,0	3,2	2,5	5,2	180	186	6.57013e-06	0.00413491	0.0,0.0	0.292,0.721	-0.506
ENSG00000161010	MRNIP	chr5	-	179851242	179851337	179853196	179853276	179847977	179848066	179853377	179853437	3246	1,1	5,5	15,10	5,8	179	194	0.000761688	0.0969951	0.178,0.178	0.765,0.575	-0.492
ENSG00000204138	PHACTR4	chr1	+	28432930	28433046	28457831	28457855	28407409	28407463	28459084	28459258	13212	3,6	7,10	11,5	3,1	215	123	0.000724062	0.0950129	0.197,0.256	0.677,0.741	-0.483
ENSG00000172671	ZFAND4	chr10	-	45651965	45652033	45652983	45653059	45648293	45648534	45663541	45663842	13661	0,0	3,3	3,3	1,10	175	167	0.000386657	0.067966	0.0,0.0	0.741,0.223	-0.482
ENSG00000206195	DUXAP8	chr22	+	15791009	15791152	15815475	15815566	15790660	15790798	15826141	15827434	303	1,3	1,4	4,2	1,0	242	190	0.000492983	0.0774415	0.44,0.371	0.758,1.0	-0.474
ENSG00000225470	JPX	chrX	+	73962734	73962801	73984443	73984541	73944583	73944662	73994839	73994961	13148	2,4	4,8	30,16	6,4	166	197	0.000145591	0.037399	0.372,0.372	0.856,0.826	-0.469
ENSG00000234948	LINC01524	chr20	+	52340489	52340652	52355321	52355359	52304954	52304991	52530887	52530948	2361	0,1	4,1	8,4	3,1	262	137	0.000108593	0.0310651	0.0,0.343	0.582,0.677	-0.458
ENSG00000179818	PCBP1-AS1	chr2	-	70053730	70053792	70059642	70059680	70051202	70051305	70083506	70083687	9011	1,0	6,4	3,2	2,3	137	161	0.000559282	0.080916	0.164,0.0	0.638,0.439	-0.456
ENSG00000106829	TLE4	chr9	+	79612655	79612718	79627373	79627448	79576132	79576177	79652592	79652794	14686	1,1	2,11	6,7	3,4	162	174	0.000187535	0.0445379	0.349,0.089	0.682,0.653	-0.449
ENSG00000239665	AL157392.3	chr10	+	13652407	13652489	13652845	13652882	13648084	13648230	13654352	13654427	11297	0,0	1,1	3,6	4,4	181	136	8.70812e-07	0.000782922	0.0,0.0	0.36,0.53	-0.445
ENSG00000177842	ZNF620	chr3	+	40507842	40507941	40508655	40508774	40506303	40506376	40511469	40511596	2407	0,0	1,1	2,3	4,3	198	218	0.000198743	0.0462256	0.0,0.0	0.355,0.524	-0.44
ENSG00000243144	AC079760.2	chr7	+	91466844	91466878	91493394	91493535	91455555	91456033	91496502	91496646	7528	1,0	5,6	7,11	18,10	133	240	0.000360746	0.0677718	0.265,0.0	0.412,0.665	-0.406
ENSG00000197580	BCO2	chr11	+	112213723	112213861	112214761	112214944	112202022	112202190	112216219	112216330	2411	0,1	7,8	7,2	7,5	237	282	0.000153705	0.0386937	0.0,0.129	0.543,0.322	-0.368
ENSG00000176124	DLEU1	chr13	+	50492650	50492761	50527865	50528064	50415088	50415202	50528179	50528534	9271	0,0	1,1	4,2	8,8	210	298	8.04625e-05	0.0241138	0.0,0.0	0.415,0.262	-0.339
ENSG00000115525	ST3GAL5	chr2	-	85851263	85851703	85852859	85853091	85847860	85848204	85861180	85861292	13300	1,0	11,6	2,5	9,8	331	539	0.000760783	0.0969951	0.129,0.0	0.266,0.504	-0.321
ENSG00000204147	ASAH2B	chr10	+	50743672	50743741	50745127	50745274	50742914	50743010	50749342	50749402	9809	0,0	12,12	4,7	19,17	168	246	3.01191e-06	0.00223006	0.0,0.0	0.236,0.376	-0.306
ENSG00000135549	PKIB	chr6	+	122481898	122481956	122585492	122585553	122477850	122477939	122585920	122586124	13396	0,0	4,4	8,5	22,10	157	160	5.16449e-05	0.0171067	0.0,0.0	0.27,0.338	-0.304
ENSG00000101901	ALG13	chrX	+	111689086	111689197	111711674	111711725	111684964	111685103	111712483	111712530	683	1,0	11,5	14,15	18,25	210	150	1.82667e-05	0.00958013	0.061,0.0	0.357,0.3	-0.298
ENSG00000185122	HSF1	chr8	+	144292482	144292619	144293461	144293580	144291604	144291874	144308905	144309014	952	9,6	4,2	7,14	0,0	236	218	0.000201987	0.0462256	0.675,0.735	1.0,1.0	-0.295
ENSG00000143776	CDC42BPA	chr1	-	227051880	227051985	227068653	227068701	227047926	227048010	227069776	227069853	797	1,1	23,46	24,18	54,69	147	204	5.27283e-07	0.000603356	0.057,0.029	0.381,0.266	-0.281
ENSG00000080947	CROCCP3	chr1	-	16486425	16486661	16489684	16489791	16485568	16485665	16490617	16490783	3630	0,0	9,11	3,7	30,20	206	335	1.94661e-05	0.00980078	0.0,0.0	0.14,0.363	-0.252
ENSG00000178440	TIMM23B-AGAP6	chr10	+	49981188	49981281	49987164	49987234	49973011	49973142	49989307	49989376	35	10,19	17,41	60,69	48,46	192	169	0.000385411	0.067966	0.341,0.29	0.524,0.569	-0.231
ENSG00000089682	RBM41	chrX	-	107088435	107088839	107113396	107113468	107069254	107070425	107115351	107115556	9996	51,68	243254	179195	314315	171	503	1.70643e-08	3.29572e-05	0.382,0.441	0.626,0.646	-0.225
ENSG00000249859	PVT1	chr8	+	127795893	127796008	127855154	127855319	127794589	127794734	127890588	127890998	7743	0,0	4,2	3,4	15,15	214	264	0.000545014	0.080916	0.0,0.0	0.198,0.248	-0.223
ENSG00000162769	FLVCR1	chr1	+	212863724	212863869	212872677	212872818	212858274	212859190	212883370	212883438	3138	49,29	76,70	98110	80,99	244	240	0.000452874	0.0759223	0.388,0.29	0.546,0.522	-0.195
ENSG00000145833	DDX46	chr5	+	134789215	134789264	134790105	134790222	134788512	134788591	134790469	134790552	14237	0,4	40,31	28,16	95,78	148	216	0.00065949	0.0892581	0.0,0.158	0.301,0.23	-0.186
ENSG00000169062	UPF3A	chr13	+	114282836	114282943	114286301	114286400	114282020	114282127	114286518	114286629	336	123122	122116	236262	134,97	206	198	5.13039e-05	0.0171067	0.492,0.503	0.629,0.722	-0.178
ENSG00000104728	ARHGEF10	chr8	+	1898435	1898525	1905570	1905716	1896332	1896449	1909294	1909470	14320	0,0	12,16	8,2	28,34	189	245	4.66134e-05	0.0162979	0.0,0.0	0.27,0.071	-0.171
ENSG00000102878	HSF4	chr16	+	67167302	67167402	67167474	67167599	67167119	67167222	67167823	67167947	9676	5,9	63,70	32,18	92,65	199	224	0.0006371	0.087165	0.082,0.126	0.281,0.238	-0.155
ENSG00000205581	HMGN1	chr21	-	39345829	39345958	39347378	39347478	39345145	39345274	39348291	39348339	6152	110,98	189214	258323	284316	199	228	4.0378e-05	0.0154011	0.4,0.344	0.51,0.539	-0.152
ENSG00000234741	GAS5	chr1	-	173864483	173864704	173865509	173865547	173863900	173864075	173865856	173865894	6769	342433	924833	13271005	14301587	137	320	0.000387328	0.067966	0.464,0.548	0.684,0.597	-0.135
ENSG00000050426	LETMD1	chr12	+	51053777	51053860	51056143	51056245	51052091	51052207	51056349	51056502	3194	17,29	94147	115,98	264275	182	201	0.000527719	0.0800289	0.166,0.179	0.325,0.282	-0.131
ENSG00000188243	COMMD6	chr13	-	75530113	75530266	75530310	75530405	75526435	75526639	75537663	75537675	4639	13,16	268359	107,79	623437	194	252	1.54705e-09	6.49089e-06	0.059,0.055	0.182,0.19	-0.129
ENSG00000100181	TPTEP1	chr22	+	16647167	16647257	16647662	16647785	16638578	16638740	16648526	16648830	10778	10,11	124148	50,60	229261	189	222	4.00204e-05	0.0154011	0.087,0.08	0.204,0.213	-0.125
ENSG00000260238	PMF1-BGLAP	chr1	+	156233627	156233728	156236287	156236483	156213008	156213176	156242552	156242591	3276	5,1	108121	17,32	225254	200	295	0.000332221	0.0633586	0.064,0.012	0.1,0.157	-0.09
ENSG00000175061	SNHG29	chr17	+	16439527	16439703	16440110	16440253	16439326	16439414	16441073	16441130	3121	524600	14551646	21391768	37693224	275	242	0.000371012	0.067966	0.241,0.243	0.333,0.326	-0.088
ENSG00000205581	HMGN1	chr21	-	39345829	39345958	39347246	39347292	39345145	39345274	39347378	39347483	6150	6,1	178201	16,26	287306	145	228	0.000488558	0.0774415	0.05,0.008	0.081,0.118	-0.071
ENSG00000113648	MACROH2A1	chr5	-	135350822	135350913	135352945	135353045	135345967	135346057	135360496	135360607	9074	11121282	155221	18071746	672489	199	190	1.83285e-08	3.29572e-05	0.873,0.847	0.72,0.773	0.114
ENSG00000127314	RAP1B	chr12	+	68624670	68624873	68641033	68641153	68610907	68611043	68648698	68648781	12202	21,37	0,0	55,37	8,2	302	219	0.00023519	0.049339	1.0,1.0	0.833,0.931	0.118
ENSG00000087053	MTMR2	chr11	-	95866402	95866486	95887611	95887759	95865600	95865676	95888155	95888261	14072	12,21	0,0	45,46	5,5	247	183	0.000603299	0.0843748	1.0,1.0	0.87,0.872	0.129
ENSG00000087053	MTMR2	chr11	-	95866402	95866486	95882373	95882496	95865625	95865676	95888155	95888261	14073	11,19	0,0	40,41	5,5	222	183	0.000591314	0.0836277	1.0,1.0	0.868,0.871	0.131
ENSG00000073921	PICALM	chr11	-	85990249	85990399	85996825	85996929	85983865	85983973	86003365	86003451	8667	449512	370411	861724	11771058	203	249	9.25526e-06	0.00554742	0.598,0.604	0.473,0.456	0.136
ENSG00000223745	CCDC18-AS1	chr1	-	93269682	93269758	93305387	93305470	93264644	93264772	93324634	93324729	1278	14,14	0,0	38,41	4,9	182	175	0.000212035	0.0465348	1.0,1.0	0.901,0.814	0.143
ENSG00000248049	UBA6-AS1	chr4	+	67731505	67732345	67754158	67754240	67730073	67730170	67755188	67755255	3486	84,89	0,1	145228	6,10	939	181	0.000215714	0.0465348	1.0,0.945	0.823,0.815	0.153
ENSG00000143363	PRUNE1	chr1	+	151018466	151018669	151027232	151027327	151017811	151017904	151033805	151035713	11035	54,89	7,9	126144	33,48	302	194	0.000762891	0.0969951	0.832,0.864	0.71,0.658	0.164
ENSG00000183354	KIAA2026	chr9	-	5933750	5933881	5944870	5944960	5929043	5929159	5954015	5954095	11962	16,13	1,0	24,33	10,6	189	230	0.000254844	0.0523624	0.951,1.0	0.745,0.87	0.168
ENSG00000196756	SNHG17	chr20	-	38422290	38422368	38425934	38426048	38421005	38421098	38426418	38426503	3481	15,22	0,0	21,30	2,9	213	177	2.91456e-05	0.013102	1.0,1.0	0.897,0.735	0.184
ENSG00000104756	KCTD9	chr8	-	25439605	25439664	25440576	25440673	25436417	25436485	25458198	25458306	7660	5,9	0,0	19,16	2,5	196	158	0.000481344	0.0774415	1.0,1.0	0.885,0.721	0.197
ENSG00000138674	SEC31A	chr4	-	82861630	82861708	82862533	82862572	82857688	82857764	82863317	82863392	8532	34,37	71,68	51,53	291318	138	177	6.48122e-07	0.000674703	0.381,0.411	0.184,0.176	0.216
ENSG00000115760	BIRC6	chr2	+	32401462	32401623	32406498	32406557	32401162	32401385	32414768	32416163	8199	69,61	17,12	96,70	50,43	260	158	0.000388779	0.067966	0.712,0.755	0.538,0.497	0.216
ENSG00000225470	JPX	chrX	+	73946998	73947374	73962730	73962801	73944583	73944662	73994839	73994961	13132	93,69	5,5	128110	25,28	475	170	0.000121037	0.0331195	0.869,0.832	0.647,0.584	0.235
ENSG00000156931	VPS8	chr3	+	184898564	184898654	184900920	184900972	184894702	184894925	184913518	184913561	4667	29,38	5,13	41,39	37,32	189	151	0.000458417	0.0759223	0.823,0.7	0.47,0.493	0.28
ENSG00000153310	CYRIB	chr8	-	129880375	129880458	129896748	129896854	129879388	129879471	129903311	129903350	11697	3,12	8,10	3,4	34,35	205	182	0.000723122	0.0950129	0.25,0.516	0.073,0.092	0.3
ENSG00000173818	ENDOV	chr17	+	80417780	80417945	80422139	80422245	80415649	80415821	80423519	80423632	792	4,12	0,0	5,10	2,3	264	205	0.000724655	0.0950129	1.0,1.0	0.66,0.721	0.309
ENSG00000111834	RSPH4A	chr6	+	116627628	116628369	116629566	116629702	116622767	116623002	116630434	116630552	3462	9,4	0,0	23,15	5,1	840	235	7.04676e-05	0.0216335	1.0,1.0	0.563,0.808	0.315
ENSG00000255036	STRA6LP	chr9	+	97343339	97343563	97350408	97350555	97330321	97330767	97354568	97354713	1247	27,41	8,5	46,15	29,17	323	246	0.000558704	0.080916	0.72,0.862	0.547,0.402	0.316
ENSG00000226476	LINC01748	chr1	-	60554472	60554568	60573337	60573413	60542296	60542411	60588036	60588162	2245	2,3	0,0	8,3	3,4	175	195	2.27062e-05	0.0109924	1.0,1.0	0.748,0.455	0.398
ENSG00000084453	SLCO1A2	chr12	-	21314548	21314681	21318781	21318923	21306881	21306988	21334587	21334704	11493	6,8	1,2	9,6	14,11	241	232	0.000406634	0.0691662	0.852,0.794	0.382,0.344	0.46
ENSG00000187554	TLR5	chr1	-	223137177	223137263	223141647	223141763	223134681	223134864	223143195	223143248	12758	2,2	1,0	2,1	2,4	215	185	0.000586282	0.0836277	0.632,1.0	0.462,0.177	0.497
ENSG00000122678	POLM	chr7	-	44074397	44074530	44076508	44076629	44073782	44074025	44078755	44078811	14640	1,3	0,0	2,3	8,1	220	232	1.45656e-05	0.00797119	1.0,1.0	0.209,0.76	0.516
ENSG00000235257	ITGA9-AS1	chr3	-	37821013	37821100	37834678	37834767	37808495	37808880	37851423	37851492	13124	2,4	0,1	4,0	3,4	188	186	0.000207461	0.0465348	1.0,0.798	0.569,0.0	0.615
ENSG00000092621	PHGDH	chr1	+	119724318	119724469	119724784	119724875	119723375	119723441	119726850	119726905	10465	7,3	0,0	2,6	6,5	250	190	2.73004e-09	8.59076e-06	1.0,1.0	0.202,0.477	0.66
ENSG00000117425	PTCH2	chr1	-	44828981	44829074	44829401	44829533	44828505	44828631	44829613	44829761	3145	3,1	0,0	3,1	6,2	231	192	6.96841e-07	0.000674703	1.0,1.0	0.294,0.294	0.706
ENSG00000150527	MIA2	chr14	+	39279448	39279537	39291018	39291111	39267123	39267522	39293270	39293381	7276	1,5	0,2	0,0	1,2	188	192	7.92845e-08	0.000110884	1.0,0.719	0.0,0.0	0.859
