# Supplementary material for: RBM17 Mediates Evasion of Pro-Leukemic Factors from Splicing-coupled NMD to Enforce Leukemic Stem Cell Maintenance
Source: Research Square preprint supplement (doi:10.21203/rs.3.rs-728533/v1), 2021-07-27
Supplement: Supplementary file 8 [file b8321455146142e07b648e44.xlsx]

## Sheet: Proteins
Accession	Short	Description	Gene	Name	Exp. q-value: Combined	Sum PEP Score	Coverage [%]	# Peptides	# PSMs	# Unique Peptides	# Protein Groups	# AAs	MW [kDa]	calc. pI	Score Sequest HT: Sequest HT	# Peptides (by Search Engine): Sequest HT	# Razor Peptides	Abundances (Grouped): F1, 126	Abundances (Grouped): F1, 127	Abundances (Grouped): F1, 128	Abundances (Grouped): F1, 129	Abundances (Grouped): F1, 130	Abundances (Grouped): F1, 131	Norm126	Norm127	Norm128	Norm129	Norm130	Norm131	Modifications	Scr_Avg	ShRBM17#1_FC	ShRBM17#1_SigB	ShRBM17#3_FC	ShRBM17#3_SigB	ShRBM17#1_ShRBM17#2
P25815	P25815	Protein S100-P [OS=Homo sapiens]	S100P	S100 calcium binding protein P(S100P)	0	17.329	32	3	8	3	1	95	10.4	4.88	29.92	3	0	3102.2	2029.4	716.8	2831.3	1852.1	691.6	3102.2	1979.63	713.904	2650.05	1790.01	713.68		2876.12	0.655333	0.000837738	0.248179	1.98244e-08	TRUE
Q96I25	Q96I25	Splicing factor 45 [OS=Homo sapiens]	RBM17	RNA binding motif protein 17(RBM17)	0	176.942	49	20	90	19	1	401	44.9	5.97	316.83	20	0	14264.4	4911	4766.2	14975.1	5111.7	4682.4	14264.4	4790.56	4746.95	14016.4	4940.33	4831.89		14140.4	0.344081	9.37452e-15	0.338704	7.30369e-09	TRUE
Q96N21-2	Q96N21	Isoform 2 of AP-4 complex accessory subunit tepsin [OS=Homo sapiens]	TEPSIN	TEPSIN, adaptor related protein complex 4 accessory protein(TEPSIN)	0	29.907	20	5	8	1	1	441	45.7	7.02	27.89	5	0	25.4	12.6	17.8	28.5	9.6	24.4	25.4	12.291	17.7281	26.6755	9.27816	25.179		26.0377	0.41419	6.7017e-07	0.82394	0.185049	TRUE
Q14240-2	Q14240	Isoform 2 of Eukaryotic initiation factor 4A-II [OS=Homo sapiens]	EIF4A2	eukaryotic translation initiation factor 4A2(EIF4A2)	0	273.915	71	27	243	13	1	408	46.5	5.48	704.33	27	0	8778.7	5715.4	3149.2	9709	6248.7	3322.9	8778.7	5575.23	3136.48	9087.45	6039.21	3428.99		8933.07	0.650081	0.00044343	0.367481	2.78864e-06	TRUE
Q12999	Q12999	Tetraspanin-31 [OS=Homo sapiens]	TSPAN31	tetraspanin 31(TSPAN31)	0.001	11.883	9	2	8	1	1	210	23	7.97	20.45	2	0	248.8	116.1	175.4	265.7	123	182.2	248.8	113.253	174.691	248.69	118.876	188.017		248.745	0.4666	1.79996e-07	0.729076	0.0658203	TRUE
Q8WVJ2	Q8WVJ2	NudC domain-containing protein 2 [OS=Homo sapiens]	NUDCD2	NudC domain containing 2(NUDCD2)	0	93.648	56	8	32	8	1	157	17.7	5.07	147.48	8	0	4961.8	4447.2	1810.6	4997.8	4449.1	1771.4	4961.8	4338.13	1803.29	4677.85	4299.95	1827.95		4819.83	0.896098	0.331519	0.376698	4.79708e-07	TRUE
Q86U06-1	Q86U06	probable RNA-binding protein 23 [OS=Homo sapiens]	RBM23	RNA binding motif protein 23(RBM23)	0	54.969	24	7	30	1	1	439	48.7	9.85	80.07	7	0	18.2	13.6	9.1	19.9	11.6	5.2	18.2	13.2665	9.06324	18.626	11.2111	5.36601		18.413	0.664681	0.00405382	0.391822	0.000102689	TRUE
Q9NZ72	Q9NZ72	Stathmin-3 [OS=Homo sapiens]	STMN3	stathmin 3(STMN3)	0	17.771	25	4	7	4	1	180	21	7.49	24.25	4	0	552.9	278.6	229.9	570.2	305.8	215	552.9	271.767	228.971	533.697	295.548	221.864		543.298	0.522103	0.000105644	0.414906	0.000208524	TRUE
P06753-2	P06753	Isoform 2 of Tropomyosin alpha-3 chain [OS=Homo sapiens]	TPM3	tropomyosin 3(TPM3)	0	253.112	72	32	162	2	1	248	29	4.78	575.42	32	32	31377.5	17619.6	36983.6	33605	17700.2	35537.2	31377.5	17187.5	36834.2	31453.7	17106.8	36671.8		31415.6	0.545816	5.49376e-09	1.1699	0.208742	FALSE
Q15274	Q15274	nicotinate-nucleotide pyrophosphorylase [carboxylating] [OS=Homo sapiens]	QPRT	quinolinate phosphoribosyltransferase(QPRT)	0	82.453	38	9	41	9	1	297	30.8	6.21	143.77	9	0	4159.1	2392	3708.9	4428.9	2333.1	3543.3	4159.1	2333.34	3693.92	4145.37	2254.88	3656.42		4152.24	0.5525	1.18135e-06	0.885106	0.421755	TRUE
P08962	P08962	CD63 antigen [OS=Homo sapiens]	CD63	CD63 molecule(CD63)	0	14.834	8	2	8	2	1	238	25.6	7.81	19.81	2	0	1430.1	1471	633.8	1621	1562.2	584.6	1430.1	1434.92	631.24	1517.23	1509.83	603.264		1473.66	0.999126	0.963953	0.418855	3.73264e-05	TRUE
Q2M1P5	Q2M1P5	Kinesin-like protein KIF7 [OS=Homo sapiens]	KIF7	kinesin family member 7(KIF7)	0	15.548	3	4	13	2	1	1343	150.5	6.79	41.25	4	0	119.9	39	46.2	127.5	48.5	54.3	119.9	38.0435	46.0134	119.338	46.874	56.0336		119.619	0.354951	4.19997e-06	0.42655	0.000306356	TRUE
Q15056-2	Q15056	Isoform Short of Eukaryotic translation initiation factor 4H [OS=Homo sapiens]	EIF4H	eukaryotic translation initiation factor 4H(EIF4H)	0	107.745	64	15	99	1	1	228	25.2	8.09	329.69	15	0	819.3	641.9	374.3	840	592	345.4	819.3	626.157	372.788	786.225	572.153	356.427		802.762	0.746367	0.0349209	0.454191	0.000998351	TRUE
O75121	O75121	Microfibrillar-associated protein 3-like [OS=Homo sapiens]	MFAP3L	microfibrillar associated protein 3 like(MFAP3L)	0.005	5.526	5	3	4	3	1	409	45.4	5.22	9.72	3	0	606	360.7	617	687.6	374.7	564.3	606	351.854	614.507	643.581	362.138	582.316		624.791	0.571385	0.000497999	0.95778	0.69672	TRUE
P57060	P57060	RWD domain-containing protein 2B [OS=Homo sapiens]	RWDD2B	RWD domain containing 2B(RWDD2B)	0	21.164	22	5	8	5	1	319	36.3	5.87	24.36	5	0	1277.5	913.4	594.9	1440.6	916.2	647.4	1277.5	890.999	592.497	1348.38	885.485	668.069		1312.94	0.67653	0.00173982	0.480055	0.000220682	TRUE
Q15072	Q15072	Zinc finger protein OZF [OS=Homo sapiens]	ZNF146	zinc finger protein 146(ZNF146)	0	25.686	22	5	12	3	1	292	33.3	8.88	37.81	5	2	992.2	1080.5	466.8	1039.5	1006.8	477.7	992.2	1054	464.914	972.953	973.047	492.951		982.577	1.0315	0.881054	0.487425	0.0011509	FALSE
Q9P287-2	Q9P287	Isoform 2 of BRCA2 and CDKN1A-interacting protein [OS=Homo sapiens]	BCCIP	BRCA2 and CDKN1A interacting protein(BCCIP)	0	107.699	60	14	47	3	1	322	36.2	4.69	184.03	14	0	409.6	247.4	207.5	468.7	257.9	200.8	409.6	241.332	206.662	438.695	249.254	207.211		424.147	0.578321	0.000977989	0.487888	0.00112762	TRUE
Q8WUM9	Q8WUM9	Sodium-dependent phosphate transporter 1 [OS=Homo sapiens]	SLC20A1	solute carrier family 20 member 1(SLC20A1)	0	17.002	5	3	13	3	1	679	73.7	7.08	34.04	3	0	1141.5	563.3	552.7	1218.9	520	562.1	1141.5	549.485	550.467	1140.87	502.567	580.046		1141.18	0.460947	1.48884e-06	0.495324	0.00136072	TRUE
Q9Y5N6	Q9Y5N6	Origin recognition complex subunit 6 [OS=Homo sapiens]	ORC6	origin recognition complex subunit 6(ORC6)	0	22.886	26	6	8	6	1	252	28.1	8.66	24.88	6	0	1446	976.4	763.4	1640.7	1003.6	724.7	1446	952.453	760.316	1535.67	969.955	747.837		1490.83	0.644743	0.000591497	0.505809	0.000442399	TRUE
Q8N2E2	Q8N2E2	von Willebrand factor D and EGF domain-containing protein [OS=Homo sapiens]	VWDE	von Willebrand factor D and EGF domains(VWDE)	0	33.296	5	7	18	7	1	1590	176.7	5.66	47.41	7	0	834.9	579.4	432.8	983.8	547.2	449.7	834.9	565.19	431.052	920.819	528.855	464.057		877.86	0.623132	0.0018342	0.509825	0.00300166	TRUE
P52789	P52789	Hexokinase-2 [OS=Homo sapiens]	HK2	hexokinase 2(HK2)	0	279.406	47	42	142	38	1	917	102.3	6.05	450.62	42	0	16219.5	9599.1	12684.1	16426.7	9570.6	11691	16219.5	9363.68	12632.9	15375.1	9249.75	12064.2		15797.3	0.589133	1.36188e-06	0.781688	0.0988426	TRUE
Q14CB8-2	Q14CB8	Isoform 2 of Rho GTPase-activating protein 19 [OS=Homo sapiens]	ARHGAP19	Rho GTPase activating protein 19(ARHGAP19)	0	46.722	18	9	16	9	1	517	58	9.33	45.87	9	0	1573.4	1427	801.2	1641.6	1435.2	776.4	1573.4	1392	797.963	1536.51	1387.09	801.187		1554.95	0.893624	0.291651	0.514212	0.000551401	TRUE
O75147	O75147	Obscurin-like protein 1 [OS=Homo sapiens]	OBSL1	obscurin like 1(OBSL1)	0	111.233	16	24	40	24	1	1896	206.8	5.63	131.22	24	0	4100.8	2557.1	3256.1	4542.5	2537.7	3270.6	4100.8	2494.39	3242.95	4251.7	2452.62	3375.02		4176.25	0.592279	9.19238e-06	0.792333	0.160253	TRUE
Q86UD0	Q86UD0	Suppressor APC domain-containing protein 2 [OS=Homo sapiens]	SAPCD2	suppressor APC domain containing 2(SAPCD2)	0	16.442	16	6	6	6	1	394	42.6	8.82	15.49	6	0	835.1	628	454.3	924.4	581.8	417.3	835.1	612.598	452.465	865.222	562.295	430.623		850.161	0.690983	0.0104178	0.519365	0.00359001	TRUE
Q9Y6K1	Q9Y6K1	DNA (cytosine-5)-methyltransferase 3A [OS=Homo sapiens]	DNMT3A	DNA methyltransferase 3 alpha(DNMT3A)	0.001	12.056	4	4	7	2	1	912	101.8	6.57	18.68	4	0	31.2	18.1	21.5	30.1	18.4	21.7	31.2	17.6561	21.4131	28.1731	17.7831	22.3928		29.6865	0.596891	0.000579256	0.737808	0.0664469	TRUE
Q9BY77-2	Q9BY77	Isoform 2 of Polymerase delta-interacting protein 3 [OS=Homo sapiens]	POLDIP3	DNA polymerase delta interacting protein 3(POLDIP3)	0	118.182	54	17	48	1	1	392	42.9	9.91	190.84	17	0	200.8	116.5	136.4	191.4	117.2	139.5	200.8	113.643	135.849	179.147	113.271	143.954		189.973	0.597225	8.21721e-05	0.736426	0.0725046	TRUE
Q8NE86	Q8NE86	Calcium uniporter protein, mitochondrial [OS=Homo sapiens]	MCU	mitochondrial calcium uniporter(MCU)	0	38.847	26	8	15	8	1	351	39.8	8.65	62.09	8	0	3871.9	2184.1	4101.2	3695.2	2339.5	4086.7	3871.9	2130.53	4084.63	3458.64	2261.07	4217.17		3665.27	0.599083	1.28333e-05	1.1325	0.492987	FALSE
P35790	P35790	Choline kinase alpha [OS=Homo sapiens]	CHKA	choline kinase alpha(CHKA)	0	45.774	34	10	25	10	1	457	52.2	6.55	75	10	0	2038.3	1227.3	1590.6	2060.3	1244	1508.6	2038.3	1197.2	1584.17	1928.4	1202.3	1556.76		1983.35	0.604909	0.000483308	0.791826	0.150006	TRUE
Q5XUX1-3	Q5XUX1	Isoform 3 of F-box/WD repeat-containing protein 9 [OS=Homo sapiens]	FBXW9	F-box and WD repeat domain containing 9(FBXW9)	0	19.065	13	5	6	5	1	458	50.7	6.48	18.89	5	0	1465.2	919	1064.3	1578.8	915.9	1050.4	1465.2	896.461	1060	1477.73	885.195	1083.93		1471.46	0.605402	0.000137933	0.728504	0.0510481	TRUE
Q9BVM2	Q9BVM2	protein DPCD [OS=Homo sapiens]	DPCD	deleted in primary ciliary dyskinesia homolog (mouse)(DPCD)	0	30.83	34	7	16	7	1	203	23.2	9.03	42.27	7	0	2394.6	1509.2	1918.7	2535.3	1505.9	1905	2394.6	1472.19	1910.95	2373	1455.42	1965.82		2383.8	0.614063	0.00019087	0.81315	0.228432	TRUE
P61968	P61968	LIM domain transcription factor LMO4 [OS=Homo sapiens]	LMO4	LIM domain only 4(LMO4)	0	22.493	30	3	6	3	1	165	18	8.34	22.74	3	0	524.5	349.6	494.4	630.9	356	485.6	524.5	341.026	492.403	590.511	344.065	501.103		557.506	0.614425	0.00170982	0.891028	0.424975	TRUE
P09038-4	P09038	Fibroblast growth factor 2 [OS=Homo sapiens]	FGF2	fibroblast growth factor 2(FGF2)	0.002	6.915	6	2	2	2	1	288	30.8	11.18	6.27	2	0	201.6	204.5	105.2	222.6	207.4	105.9	201.6	199.485	104.775	208.35	200.447	109.281		204.975	0.975563	0.819681	0.522152	0.00213877	TRUE
Q16401	Q16401	26S proteasome non-ATPase regulatory subunit 5 [OS=Homo sapiens]	PSMD5	proteasome 26S subunit, non-ATPase 5(PSMD5)	0	184.317	61	23	175	23	1	504	56.2	5.48	605.81	23	0	17739.3	11104.8	19208.9	18756.6	11273.4	18339.4	17739.3	10832.5	19131.3	17555.8	10895.5	18924.9		17647.6	0.615606	6.32021e-06	1.07823	0.388059	FALSE
Q8TCX1-2	Q8TCX1	Isoform 2 of Cytoplasmic dynein 2 light intermediate chain 1 [OS=Homo sapiens]	DYNC2LI1	dynein cytoplasmic 2 light intermediate chain 1(DYNC2LI1)	0	19.438	21	7	8	1	1	352	39.7	7.53	24.38	7	0	64	33.1	87.3	67.5	47.6	87.6	64	32.2882	86.9473	63.1788	46.0042	90.3967		63.5894	0.615609	0.00102153	1.39445	0.130729	FALSE
Q13164-1	Q13164	Mitogen-activated protein kinase 7 [OS=Homo sapiens]	MAPK7	mitogen-activated protein kinase 7(MAPK7)	0	32.94	14	7	8	7	1	816	88.3	5.88	31.82	7	0	551.6	368.5	529.5	609	343.7	557.7	551.6	359.462	527.361	570.013	332.178	575.505		560.807	0.616648	0.00181674	0.983286	0.815119	TRUE
P23193	P23193	Transcription elongation factor A protein 1 [OS=Homo sapiens]	TCEA1	transcription elongation factor A1(TCEA1)	0	205.588	54	21	123	21	1	301	33.9	8.38	384.7	21	0	17018.4	17934.4	8772.1	17692.9	18238	8556.1	17018.4	17494.6	8736.66	16560.2	17626.6	8829.26		16789.3	1.04594	0.582715	0.523128	4.84448e-05	FALSE
P0DMU9	P0DMU9	Cancer/testis antigen family 45 member A10 [OS=Homo sapiens]	CT45A10	cancer/testis antigen family 45 member A10(CT45A10)	0	99.5	63	9	42	9	1	189	21.1	9.55	146.64	9	0	3852.9	3190.7	2026.1	4057.5	3209.3	1947.9	3852.9	3112.45	2017.92	3797.75	3101.71	2010.09		3825.32	0.812239	0.0362426	0.526492	0.0017724	TRUE
P17482	P17482	Homeobox protein Hox-B9 [OS=Homo sapiens]	HOXB9	homeobox B9(HOXB9)	0	35.033	43	8	10	8	1	250	28	8.9	35.07	8	0	1803.5	1270.9	940.4	1862.9	1301.8	914.1	1803.5	1239.73	936.601	1743.64	1258.16	943.283		1773.57	0.704198	0.00863501	0.529972	0.0014608	TRUE
Q9H4M3-2	Q9H4M3	Isoform 2 of F-box only protein 44 [OS=Homo sapiens]	FBXO44	F-box protein 44(FBXO44)	0	25.313	32	5	11	3	1	224	25.7	7.88	37.9	5	1	798	549	426.9	847.4	564.1	407.7	798	535.536	425.175	793.151	545.189	420.716		795.576	0.679209	0.00786494	0.531622	0.00449939	TRUE
O14832	O14832	Phytanoyl-CoA dioxygenase, peroxisomal [OS=Homo sapiens]	PHYH	phytanoyl-CoA 2-hydroxylase(PHYH)	0.008	4.502	4	1	2	1	1	338	38.5	8.47	3.67	1	0	70.6	85.2	40.6	110.7	59.2	50.7	70.6	83.1104	40.436	103.613	57.2153	52.3186		87.1066	0.805483	0.134188	0.53242	0.00285133	TRUE
Q719H9	Q719H9	BTB/POZ domain-containing protein KCTD1 [OS=Homo sapiens]	KCTD1	potassium channel tetramerization domain containing 1(KCTD1)	0	12.813	11	3	12	1	1	257	29.4	7.08	37.4	3	0	163.5	107.3	85.4	180.6	107.7	90.1	163.5	104.668	85.055	169.038	104.089	92.9765		166.269	0.627771	0.00648998	0.535371	0.00301836	TRUE
Q14106	Q14106	Protein Tob2 [OS=Homo sapiens]	tob2	transducer of ERBB2, 2(TOB2)	0.001	10.473	10	2	3	2	1	344	36.6	6.93	7.14	2	0	85.4	57.2	64.2	92.7	54.4	62.6	85.4	55.7972	63.9406	86.7655	52.5763	64.5986		86.0828	0.629472	0.00672385	0.746602	0.0861994	TRUE
P11169	P11169	Solute carrier family 2, facilitated glucose transporter member 3 [OS=Homo sapiens]	SLC2A3	solute carrier family 2 member 3(SLC2A3)	0	48.203	14	9	13	9	1	496	53.9	7.2	47.13	9	0	2368.1	1496.4	1797.4	2365.2	1474.3	1733	2368.1	1459.7	1790.14	2213.78	1424.87	1788.33		2290.94	0.629561	0.000340907	0.781003	0.15627	TRUE
Q96AY2	Q96AY2	crossover junction endonuclease EME1 [OS=Homo sapiens]	EME1	essential meiotic structure-specific endonuclease 1(EME1)	0	35.023	17	9	18	9	1	570	63.2	7.05	36.3	9	0	556.5	413	455.1	691	374.6	452.4	556.5	402.871	453.262	646.764	362.042	466.843		601.632	0.635698	0.00301889	0.764674	0.116358	TRUE
Q2KHR3-1	Q2KHR3	Glutamine and serine-rich protein 1 [OS=Homo sapiens]	QSER1	glutamine and serine rich 1(QSER1)	0	136.55	18	22	40	22	1	1735	189.9	7.08	145.05	22	0	3655.6	2345.4	3281.3	3838.7	2419.8	3131	3655.6	2287.88	3268.04	3592.95	2338.68	3230.96		3624.28	0.638273	7.95299e-05	0.896593	0.46601	TRUE
P12036	P12036	Neurofilament heavy polypeptide [OS=Homo sapiens]	NEFH	neurofilament heavy polypeptide(NEFH)	0	48.29	12	10	25	7	1	1026	112.4	6.18	87.02	10	0	1324.7	1103	690	1369.7	1025.2	706.3	1324.7	1075.95	687.213	1282.01	990.83	728.849		1303.36	0.792867	0.043548	0.543236	0.00115067	TRUE
O15519	O15519	CASP8 and FADD-like apoptosis regulator [OS=Homo sapiens]	CFLAR	CASP8 and FADD like apoptosis regulator(CFLAR)	0.001	9.254	5	2	3	2	1	480	55.3	8	6.19	2	0	119.7	88.6	90.7	150.5	83.6	97.7	119.7	86.4271	90.3336	140.865	80.7973	100.819		130.283	0.641775	0.00865293	0.733608	0.0730212	TRUE
Q86WH2-1	Q86WH2	Ras association domain-containing protein 3 [OS=Homo sapiens]	RASSF3	Ras association domain family member 3(RASSF3)	0.001	9.475	11	3	3	2	1	238	27.5	7.44	8.45	3	0	121.5	109.2	67	130.8	125.4	64	121.5	106.522	66.7293	122.426	121.196	66.0433		121.963	0.933551	0.538156	0.544314	0.00358044	TRUE
Q99733-2	Q99733	Isoform 2 of Nucleosome assembly protein 1-like 4 [OS=Homo sapiens]	NAP1L4	nucleosome assembly protein 1 like 4(NAP1L4)	0	186.292	46	20	96	19	1	386	44.1	4.7	348.96	20	1	13966	9209	11908.7	14910.1	9296.4	11792.5	13966	8983.15	11860.6	13955.6	8984.74	12169		13960.8	0.643512	2.87426e-05	0.860609	0.360662	TRUE
P24864-1	P24864	G1/S-specific cyclin-E1 [OS=Homo sapiens]	CCNE1	cyclin E1(CCNE1)	0.001	7.448	5	2	2	2	1	410	47	6.04	7.83	2	0	378.5	307.6	208.9	386.1	300.1	190.1	378.5	300.056	208.056	361.383	290.039	196.169		369.941	0.797552	0.112682	0.546337	0.00378382	TRUE
A6NCE7	A6NCE7	Microtubule-associated proteins 1A/1B light chain 3 beta 2 [OS=Homo sapiens]	MAP1LC3B2	microtubule associated protein 1 light chain 3 beta 2(MAP1LC3B2)	0	20.74	22	3	34	3	1	125	14.6	8.68	78.4	3	0	4042.8	2571.2	3268.2	4187.5	2729.4	2996.3	4042.8	2508.14	3255	3919.42	2637.9	3091.96		3981.11	0.646307	0.000113246	0.797134	0.169711	TRUE
Q9BY49-1	Q9BY49	peroxisomal trans-2-enoyl-CoA reductase [OS=Homo sapiens]	PECR	peroxisomal trans-2-enoyl-CoA reductase(PECR)	0.003	6.599	6	2	2	2	1	303	32.5	8.81	6.08	2	0	454.9	248.7	247.7	472.7	266.5	237.1	454.9	242.601	246.699	442.439	257.566	244.67		448.669	0.557388	0.000539965	0.547585	0.00387776	TRUE
P01106-2	P01106	Isoform 2 of Myc proto-oncogene protein [OS=Homo sapiens]	MYC	v-myc avian myelocytomatosis viral oncogene homolog(MYC)	0.007	4.885	4	2	2	2	1	454	50.5	5.43	3.55	2	0	227.3	203.8	141.5	278.8	201.1	125.1	227.3	198.802	140.928	260.952	194.358	129.094		244.126	0.80524	0.0576756	0.553039	0.00389474	TRUE
Q9Y2S6	Q9Y2S6	Translation machinery-associated protein 7 [OS=Homo sapiens]	TMA7	translation machinery associated 7 homolog(TMA7)	0	20.253	41	4	10	3	1	64	7.1	9.99	26.8	4	0	1876.3	1323.1	1633.4	2233.8	1323.9	1423.8	1876.3	1290.65	1626.8	2090.8	1279.52	1469.26		1983.55	0.647871	0.00183238	0.780434	0.129688	TRUE
Q9P2H5	Q9P2H5	ubiquitin carboxyl-terminal hydrolase 35 [OS=Homo sapiens]	USP35	ubiquitin specific peptidase 35(USP35)	0.001	12.655	4	3	4	3	1	1018	113.3	5.57	13.63	3	0	78.9	56.3	75.4	85.5	50	63.9	78.9	54.9192	75.0954	80.0265	48.3238	65.9401		79.4632	0.649627	0.00270072	0.887426	0.342397	TRUE
Q13309-1	Q13309	S-phase kinase-associated protein 2 [OS=Homo sapiens]	SKP2	S-phase kinase associated protein 2(SKP2)	0	46.006	18	7	22	7	1	424	47.7	7.11	76.67	7	0	1620.3	1038.4	874.8	1657.1	1075.4	857.9	1620.3	1012.93	871.266	1551.02	1039.35	885.289		1585.66	0.647138	0.00064354	0.553888	0.00149269	TRUE
O43681	O43681	ATPase ASNA1 [OS=Homo sapiens]	ASNA1	arsA arsenite transporter, ATP-binding, homolog 1 (bacterial)(ASNA1)	0	120.774	49	13	63	13	1	348	38.8	4.91	250.7	13	0	7953.2	5198.1	8817.7	8355.4	5365	8826.1	7953.2	5070.61	8782.08	7820.5	5185.14	9107.88		7886.85	0.65018	0.000445152	1.13416	0.32261	FALSE
Q86UY6	Q86UY6	N-alpha-acetyltransferase 40 [OS=Homo sapiens]	NAA40	N(alpha)-acetyltransferase 40, NatD catalytic subunit(NAA40)	0	31.27	35	6	11	6	1	237	27.2	7.39	26.31	6	0	939.3	652.6	678	1038.6	628.3	634.7	939.3	636.595	675.261	972.111	607.236	654.963		955.705	0.65074	0.00384816	0.695939	0.0593488	TRUE
O15042-2	O15042	Isoform 2 of U2 snRNP-associated SURP motif-containing protein [OS=Homo sapiens]	U2SURP	U2 snRNP associated SURP domain containing(U2SURP)	0	288.036	43	40	143	1	1	1028	118.2	8.47	461.47	40	41	26815	15528.5	14655.8	27715.9	16260.5	14196	26815	15147.7	14596.6	25941.6	15715.4	14649.2		26378.3	0.585008	9.43822e-08	0.554354	1.64113e-05	TRUE
O75340	O75340	programmed cell death protein 6 [OS=Homo sapiens]	PDCD6	programmed cell death 6(PDCD6)	0	73.618	61	11	49	1	1	191	21.9	5.4	142.67	11	0	286.6	258.7	153.5	301.6	283	159.1	286.6	252.355	152.88	282.292	273.512	164.179		284.446	0.924372	0.465427	0.557328	0.00422229	TRUE
Q92608-1	Q92608	Dedicator of cytokinesis protein 2 [OS=Homo sapiens]	DOCK2	dedicator of cytokinesis 2(DOCK2)	0	41.225	7	11	15	11	1	1830	211.8	6.87	42.87	11	0	702.3	457.5	472.9	721.1	468.3	500.5	702.3	446.28	470.99	674.937	452.6	516.479		688.618	0.652669	0.00466003	0.716993	0.0626404	TRUE
P56181	P56181	NADH dehydrogenase [ubiquinone] flavoprotein 3, mitochondrial [OS=Homo sapiens]	NDUFV3	NADH:ubiquinone oxidoreductase subunit V3(NDUFV3)	0	15.586	19	2	7	2	1	108	11.9	9.7	36.86	2	0	711.7	452.1	552.5	723.3	482.2	513.4	711.7	441.012	550.268	676.996	466.034	529.791		694.348	0.653164	0.0047182	0.77775	0.136143	TRUE
Q8N490-3	Q8N490	Isoform 3 of Probable hydrolase PNKD [OS=Homo sapiens]	pnkd	paroxysmal nonkinesigenic dyskinesia(PNKD)	0.001	11.219	15	4	6	4	1	361	40.7	8.88	9.5	4	0	571.8	377.3	606.9	621	399.7	584.1	571.8	368.047	604.448	581.245	386.3	602.748		576.522	0.654222	0.00484465	1.04696	0.884247	FALSE
Q96LJ7	Q96LJ7	Dehydrogenase/reductase SDR family member 1 [OS=Homo sapiens]	DHRS1	dehydrogenase/reductase 1(DHRS1)	0	41.547	27	7	12	7	1	313	33.9	7.83	47.59	7	0	1806	912.4	1001.2	1997.2	956.2	1020	1806	890.023	997.155	1869.34	924.144	1052.56		1837.67	0.493605	8.2718e-06	0.557695	0.00271899	TRUE
Q9Y5R4	Q9Y5R4	HemK methyltransferase family member 1 [OS=Homo sapiens]	HEMK1	HemK methyltransferase family member 1(HEMK1)	0.007	4.723	4	1	1	1	1	338	38.2	6.7	3.34	1	0	35.6	24.5	35.7	40.8	25.9	39.2	35.6	23.8991	35.5558	38.1881	25.0317	40.4515		36.894	0.663127	0.00388999	1.03008	0.91658	FALSE
Q93015-2	Q93015	Isoform 2 of N-acetyltransferase 6 [OS=Homo sapiens]	NAT6	N-acetyltransferase 6(NAT6)	0	20.75	17	4	5	4	1	308	33.8	7.85	20.66	4	0	681.2	489.1	519.7	761.2	463.1	645.7	681.2	477.105	517.601	712.469	447.575	666.315		696.835	0.663485	0.00609073	0.849495	0.292928	TRUE
P60520	P60520	Gamma-aminobutyric acid receptor-associated protein-like 2 [OS=Homo sapiens]	GABARAPL2	GABA type A receptor associated protein like 2(GABARAPL2)	0	60.837	47	7	60	6	1	117	13.7	8.1	206.21	7	1	6972.4	5766.6	3940.1	7626.5	5680.2	3843.4	6972.4	5625.17	3924.18	7138.27	5489.77	3966.1		7055.33	0.787698	0.0365303	0.559172	0.00126509	TRUE
Q9BZF2	Q9BZF2	Oxysterol-binding protein-related protein 7 [OS=Homo sapiens]	OSBPL7	oxysterol binding protein like 7(OSBPL7)	0	30.774	13	8	9	8	1	842	95.4	8.05	29.43	8	0	462	341.9	361	564.2	336.8	369.1	462	333.515	359.542	528.081	325.509	380.884		495.041	0.665626	0.00641689	0.747843	0.0943	TRUE
P30279	P30279	G1/S-specific cyclin-D2 [OS=Homo sapiens]	CCND2	cyclin D2(CCND2)	0.001	11.556	14	3	4	3	1	289	33	5.19	11.04	3	0	156.2	99.6	124.9	146.2	101.8	134.5	156.2	97.1573	124.395	136.841	98.3872	138.794		146.52	0.667295	0.0142982	0.898133	0.412766	TRUE
Q9UNE7-1	Q9UNE7	E3 ubiquitin-protein ligase CHIP [OS=Homo sapiens]	STUB1	STIP1 homology and U-box containing protein 1(STUB1)	0	149.834	69	21	65	21	1	303	34.8	5.87	238.75	21	0	7926.9	5551.3	6006.1	8780.9	5547.5	5978.1	7926.9	5415.15	5981.84	8218.76	5361.52	6168.96		8072.83	0.667466	0.000858605	0.752573	0.0803397	TRUE
Q00722	Q00722	1-phosphatidylinositol 4,5-bisphosphate phosphodiesterase beta-2 [OS=Homo sapiens]	PLCB2	phospholipase C beta 2(PLCB2)	0	31.723	9	9	11	8	1	1185	133.9	6.29	32.08	9	1	983.5	694	776.5	1052.7	662.8	812.8	983.5	676.979	773.363	985.308	640.58	838.749		984.404	0.669217	0.00268758	0.818827	0.214871	TRUE
Q5JSZ5-4	Q5JSZ5	Isoform 4 of Protein PRRC2B [OS=Homo sapiens]	PRRC2B	proline rich coiled-coil 2B(PRRC2B)	0	17.666	22	4	17	1	1	268	28.7	9.31	63.91	4	0	17.8	10.3	14.4	16.6	12.7	10.8	17.8	10.0474	14.3418	15.5373	12.2742	11.1448		16.6687	0.669569	0.00461071	0.764508	0.0934845	TRUE
Q6NW29	Q6NW29	RWD domain-containing protein 4 [OS=Homo sapiens]	RWDD4	RWD domain containing 4(RWDD4)	0	17.503	36	4	6	4	1	188	21.2	5.31	17.92	4	0	791.8	525.6	685.6	799.8	537.1	628.3	791.8	512.709	682.83	748.598	519.094	648.359		770.199	0.669829	0.00624884	0.864185	0.36414	TRUE
Q8TCT9-2	Q8TCT9	Isoform 2 of Minor histocompatibility antigen H13 [OS=Homo sapiens]	HM13	histocompatibility minor 13(HM13)	0	27.328	11	4	15	1	1	426	46.8	7.23	43.37	4	0	33.7	23.5	28.7	47.4	30.4	27.8	33.7	22.9237	28.5841	44.3655	29.3808	28.6875		39.0328	0.670008	0.0046639	0.733635	0.0628698	TRUE
Q96N21-1	Q96N21	AP-4 complex accessory subunit tepsin [OS=Homo sapiens]	TEPSIN	TEPSIN, adaptor related protein complex 4 accessory protein(TEPSIN)	0	31.419	18	5	7	1	1	525	55.1	7.03	28.41	5	2	323.2	210.4	236.6	311.2	213.8	235.1	323.2	205.24	235.644	291.278	206.632	242.606		307.239	0.67028	0.00127484	0.778303	0.121891	TRUE
I3L1E1	I3L1E1	uncharacterized protein C19orf84 [OS=Homo sapiens]	C19orf84	chromosome 19 open reading frame 84(C19orf84)	0.005	5.326	10	1	2	1	1	186	19.6	7.43	5.92	1	0	11	7.5	10.5	12.6	8.3	10.9	11	7.31606	10.4576	11.7934	8.02174	11.248		11.3967	0.672906	0.00502978	0.952276	0.57178	TRUE
Q7Z699	Q7Z699	sprouty-related, EVH1 domain-containing protein 1 [OS=Homo sapiens]	SPRED1	sprouty related EVH1 domain containing 1(SPRED1)	0	13.238	9	3	9	2	1	444	50.4	6.54	30.67	3	0	12.5	14.9	18.8	33.3	15.4	18.5	12.5	14.5346	18.7241	31.1682	14.8837	19.0906		21.8341	0.673678	0.00513141	0.865955	0.281668	TRUE
Q9UDY4	Q9UDY4	DnaJ homolog subfamily B member 4 [OS=Homo sapiens]	DNAJB4	DnaJ heat shock protein family (Hsp40) member B4(DNAJB4)	0	107.833	49	15	50	14	1	337	37.8	8.5	191.05	15	0	8055.6	10987.6	4398	8535.1	10876.6	4472.2	8055.6	10718.1	4380.23	7988.7	10512	4614.98		8022.15	1.32322	0.00110975	0.560648	0.00131576	FALSE
A8MPP1	A8MPP1	Putative ATP-dependent RNA helicase DDX11-like protein 8 [OS=Homo sapiens]	DDX11L8	DEAD/H-box helicase 11 like 8(DDX11L8)	0	42.407	13	9	14	1	1	907	101.7	7.47	47.04	9	0	110.1	83.9	83.5	126.3	74.7	87	110.1	81.8423	83.1627	118.215	72.1957	89.7776		114.157	0.674675	0.0164468	0.757465	0.0986341	TRUE
Q9Y6M0-1	Q9Y6M0	Testisin [OS=Homo sapiens]	Prss21	protease, serine 21(PRSS21)	0	22.999	23	5	7	5	1	314	34.9	7.62	27.21	5	0	1095	770.7	850.6	1217.5	782.2	847.7	1095	751.798	847.164	1139.56	755.977	874.764		1117.28	0.674753	0.00314469	0.77059	0.125296	TRUE
Q7LDG7-2	Q7LDG7	Isoform 2 of RAS guanyl-releasing protein 2 [OS=Homo sapiens]	RASGRP2	RAS guanyl releasing protein 2(RASGRP2)	0	12.783	6	4	4	4	1	671	75.5	7.69	13.57	4	0	720.3	464.2	384.8	726.7	460.4	391.9	720.3	452.815	383.246	680.178	444.965	404.412		700.239	0.641053	0.00346849	0.56242	0.00500563	TRUE
P27361-1	P27361	mitogen-activated protein kinase 3 [OS=Homo sapiens]	MAPK3	mitogen-activated protein kinase 3(MAPK3)	0	110.133	43	14	101	6	1	379	43.1	6.74	284.03	14	1	2862.1	2046.3	1604.8	3069.5	1972.3	1593	2862.1	1996.11	1598.32	2873	1906.18	1643.86		2867.55	0.680423	0.00192458	0.565322	0.00105937	TRUE
Q9NQG6	Q9NQG6	Mitochondrial dynamics protein MID51 [OS=Homo sapiens]	MIEF1	mitochondrial elongation factor 1(MIEF1)	0	40.744	24	10	18	10	1	463	51.3	7.64	49.12	10	0	1856.4	1332.2	1600.9	2060.6	1311.2	1490.3	1856.4	1299.53	1594.43	1928.68	1267.24	1537.88		1892.54	0.678127	0.00433156	0.827541	0.229442	TRUE
P20393	P20393	nuclear receptor subfamily 1 group D member 1 [OS=Homo sapiens]	NR1D1	nuclear receptor subfamily 1 group D member 1(NR1D1)	0.008	4.286	1	1	2	1	1	614	66.8	8.5	6.51	1	0	105	87.7	57.6	112.2	92.2	60.1	105	85.5491	57.3673	105.017	89.109	62.0187		105.009	0.831637	0.187629	0.568459	0.00560473	TRUE
Q6IAN0	Q6IAN0	Dehydrogenase/reductase SDR family member 7B [OS=Homo sapiens]	DHRS7B	dehydrogenase/reductase 7B(DHRS7B)	0	18.716	10	3	5	3	1	325	35.1	9.55	17.49	3	0	1144.5	800.4	1217.8	1283.6	841.5	1246.7	1144.5	780.77	1212.88	1201.43	813.289	1286.5		1172.96	0.679501	0.00359193	1.06541	0.806517	FALSE
P28908-1	P28908	tumor necrosis factor receptor superfamily member 8 [OS=Homo sapiens]	TNFRSF8	TNF receptor superfamily member 8(TNFRSF8)	0	35.624	16	7	12	7	1	595	63.7	5.62	34.1	7	0	1080.3	723.4	829.1	1052	723.1	872.9	1080.3	705.658	825.751	984.653	698.858	900.768		1032.48	0.680169	0.00365931	0.836106	0.256184	TRUE
Q9P2W1	Q9P2W1	Homologous-pairing protein 2 homolog [OS=Homo sapiens]	PSMC3IP	PSMC3 interacting protein(PSMC3IP)	0	47.154	47	7	14	7	1	217	24.9	7.81	57.45	7	0	1902.6	1685.1	1066.5	2029.8	1768.6	1075.9	1902.6	1643.77	1062.19	1899.86	1709.31	1110.25		1901.23	0.88182	0.279641	0.571326	0.00364776	TRUE
Q9BQI0	Q9BQI0	allograft inflammatory factor 1-like [OS=Homo sapiens]	AIF1L	allograft inflammatory factor 1 like(AIF1L)	0.004	6.053	15	2	2	2	1	150	17.1	7.2	5.78	2	0	377.7	255.2	311.9	386.3	263	290.4	377.7	248.941	310.64	361.57	254.183	299.671		369.635	0.680569	0.0124543	0.82556	0.241448	TRUE
Q9H0F7-2	Q9H0F7	Isoform 2 of ADP-ribosylation factor-like protein 6 [OS=Homo sapiens]	ARL6	ADP ribosylation factor like GTPase 6(ARL6)	0.001	8.069	13	2	2	2	1	193	21.9	7.83	7.23	2	0	352.9	245	322.5	347.8	230.6	326.7	352.9	238.991	321.197	325.535	222.869	337.13		339.217	0.680774	0.0125106	0.970362	0.78164	TRUE
Q6ZRY4	Q6ZRY4	RNA-binding protein with multiple splicing 2 [OS=Homo sapiens]	RBPMS2	RNA binding protein with multiple splicing 2(RBPMS2)	0.001	11.466	11	2	6	2	1	209	22.5	8.6	15.73	2	0	182.5	130.1	147.5	199.8	131	155	182.5	126.909	146.904	187.009	126.608	159.949		184.755	0.686093	0.0021656	0.830433	0.216139	TRUE
Q6AI12	Q6AI12	Ankyrin repeat domain-containing protein 40 [OS=Homo sapiens]	ankrd40	ankyrin repeat domain 40(ANKRD40)	0	19.966	14	4	7	4	1	368	41.1	4.97	19.95	4	0	789	540.5	858.4	880.6	600.6	786.2	789	527.244	854.932	824.226	580.465	811.3		806.613	0.686642	0.00940148	1.03286	0.950027	FALSE
Q9HCH0	Q9HCH0	Nck-associated protein 5-like [OS=Homo sapiens]	NCKAP5L	NCK associated protein 5 like(NCKAP5L)	0	51.774	11	12	27	12	1	1330	138.9	8.13	78.64	12	0	2150.8	1548.4	1737	2392.6	1557.9	1748	2150.8	1510.42	1729.98	2239.43	1505.67	1803.81		2195.12	0.687002	0.00243964	0.804921	0.208026	TRUE
Q13257-1	Q13257	Mitotic spindle assembly checkpoint protein MAD2A [OS=Homo sapiens]	MAD2L1	MAD2 mitotic arrest deficient-like 1 (yeast)(MAD2L1)	0	67.267	47	11	36	11	1	205	23.5	5.08	123.64	11	0	5099.2	4498.2	2899.2	5592.1	4461.3	2930.1	5099.2	4387.88	2887.49	5234.1	4311.74	3023.65		5166.65	0.841901	0.143052	0.572047	0.000644732	TRUE
Q8WV92	Q8WV92	MIT domain-containing protein 1 [OS=Homo sapiens]	MITD1	microtubule interacting and trafficking domain containing 1(MITD1)	0	27.637	28	6	10	6	1	249	29.3	8	31.02	6	0	1531.6	904.7	820.5	1474.2	940.1	827.7	1531.6	882.512	817.185	1379.82	908.583	854.125		1455.71	0.615195	0.000200681	0.574052	0.00240823	TRUE
Q8IVW6	Q8IVW6	AT-rich interactive domain-containing protein 3B [OS=Homo sapiens]	ARID3B	AT-rich interaction domain 3B(ARID3B)	0	72.696	32	16	48	15	1	561	60.6	7.52	153.2	16	0	4867.2	3463.5	5105.5	5242.7	3461.8	4835	4867.2	3378.56	5084.88	4907.07	3345.74	4989.36		4887.14	0.687959	0.00415536	1.03069	0.79116	FALSE
Q4G148-1	Q4G148	Glucoside xylosyltransferase 1 [OS=Homo sapiens]	GXYLT1	glucoside xylosyltransferase 1(GXYLT1)	0	21.541	11	5	11	5	1	440	50.5	8.65	30.18	5	0	548.7	395.4	711.1	577.3	377.2	656.2	548.7	385.703	708.227	540.342	364.554	677.15		544.521	0.688915	0.0111226	1.27211	0.151402	FALSE
Q9NR33	Q9NR33	DNA polymerase epsilon subunit 4 [OS=Homo sapiens]	POLE4	DNA polymerase epsilon 4, accessory subunit(POLE4)	0	32.079	34	4	24	4	1	117	12.2	4.92	61.34	4	0	6752.8	5808.7	3739.6	6518.1	6299.7	3584.4	6752.8	5666.24	3724.49	6100.82	6088.5	3698.84		6426.81	0.914508	0.41235	0.577528	0.000797317	TRUE
P28370-1	P28370	Probable global transcription activator SNF2L1 [OS=Homo sapiens]	SMARCA1	SWI/SNF related, matrix associated, actin dependent regulator of chromatin, subfamily a, member 1(SMARCA1)	0	92.39	18	21	156	5	1	1054	122.5	8.09	539.45	21	0	1566.2	1179.4	1390.6	1783.7	1117.9	1372.3	1566.2	1150.47	1384.98	1669.51	1080.42	1416.11		1617.86	0.689461	0.00263254	0.865681	0.32281	TRUE
P04629	P04629	High affinity nerve growth factor receptor [OS=Homo sapiens]	NTRK1	neurotrophic receptor tyrosine kinase 1(NTRK1)	0.001	8.754	3	3	3	3	1	796	87.4	6.64	9.12	3	0	1076.9	737.9	773.8	1075.1	741.4	833.1	1076.9	719.803	770.674	1006.27	716.545	859.697		1041.59	0.689499	0.00472837	0.782638	0.144338	TRUE
Q8WUA2	Q8WUA2	Peptidyl-prolyl cis-trans isomerase-like 4 [OS=Homo sapiens]	PPIL4	peptidylprolyl isomerase like 4(PPIL4)	0	156.321	55	24	61	24	1	492	57.2	5.92	234.64	24	0	12192.2	11155.8	6900.4	12469.4	11668.7	6709.4	12192.2	10882.2	6872.52	11671.1	11277.5	6923.6		11931.7	0.928609	0.417469	0.578131	0.000773615	TRUE
Q9BWT1-2	Q9BWT1	Isoform 2 of Cell division cycle-associated protein 7 [OS=Homo sapiens]	CDCA7	cell division cycle associated 7(CDCA7)	0	22.946	18	5	5	4	1	450	51.4	8.18	21.64	5	0	714.1	520	410.8	708.1	532.6	377.9	714.1	507.247	409.14	662.769	514.745	389.965		688.434	0.742258	0.0347877	0.580379	0.00699909	TRUE
Q969S2-1	Q969S2	Endonuclease 8-like 2 [OS=Homo sapiens]	NEIL2	nei like DNA glycosylase 2(NEIL2)	0.007	4.696	7	2	2	2	1	332	36.8	6.79	6.85	2	0	231	171	157.9	228.4	145.7	154.8	231	166.806	157.262	213.778	140.815	159.742		222.389	0.691629	0.00259331	0.712724	0.0527585	TRUE
P18858	P18858	DNA ligase 1 [OS=Homo sapiens]	LIG1	DNA ligase 1(LIG1)	0	233.34	45	35	76	35	1	919	101.7	5.62	282.36	35	0	11453.9	9358.6	6557.9	12068.3	9717	6534.4	11453.9	9129.08	6531.41	11295.7	9391.24	6743.02		11374.8	0.814094	0.0340564	0.583501	0.000911751	TRUE
Q6P4Q7	Q6P4Q7	metal transporter CNNM4 [OS=Homo sapiens]	CNNM4	cyclin and CBS domain divalent metal cation transport mediator 4(CNNM4)	0.007	4.838	2	2	4	1	1	775	86.6	6.07	9.68	2	0	538.5	586.9	315.1	609.6	581.1	323.8	538.5	572.506	313.827	570.575	561.619	334.138		554.537	1.02259	0.897733	0.584239	0.00751118	FALSE
Q8N4Y2	Q8N4Y2	EF-hand calcium-binding domain-containing protein 4A [OS=Homo sapiens]	cracr2b	calcium release activated channel regulator 2B(CRACR2B)	0.004	5.93	4	1	1	1	1	399	44.9	5.34	4.66	1	0	56	38.9	35.3	47.6	32.9	37.2	56	37.946	35.1574	44.5527	31.797	38.3876		50.2764	0.693596	0.0084882	0.731408	0.0610271	TRUE
O75496	O75496	Geminin [OS=Homo sapiens]	GMNN	geminin, DNA replication inhibitor(GMNN)	0	112.204	55	12	56	12	1	209	23.6	4.96	179.93	12	0	8568.4	7485.5	4994.4	8884.2	7885.7	4750.8	8568.4	7301.92	4974.22	8315.45	7621.33	4902.47		8441.93	0.883877	0.272516	0.584979	0.00247033	TRUE
P50851-2	P50851	Isoform 2 of Lipopolysaccharide-responsive and beige-like anchor protein [OS=Homo sapiens]	LRBA	LPS responsive beige-like anchor protein(LRBA)	0	476.254	37	77	196	1	1	2851	317.5	5.57	672.78	77	0	57.8	42.5	60.4	68.2	44.5	58.9	57.8	41.4577	60.156	63.834	43.0081	60.7804		60.817	0.694426	0.00866331	0.994265	0.751402	TRUE
Q8N5S9	Q8N5S9	Calcium/calmodulin-dependent protein kinase kinase 1 [OS=Homo sapiens]	CAMKK1	calcium/calmodulin dependent protein kinase kinase 1(CAMKK1)	0	14.039	7	3	5	3	1	505	55.7	5.78	15.46	3	0	260.4	196.3	226.4	297.9	190.2	235.3	260.4	191.486	225.485	278.829	183.824	242.812		269.615	0.696011	0.0029851	0.868458	0.312149	TRUE
P02654	P02654	Apolipoprotein C-I [OS=Homo sapiens]	apoc1	apolipoprotein C1(APOC1)	0	19.032	24	3	20	3	1	83	9.3	8.47	56.93	3	0	1954.2	1329	1475.9	1802.7	1282.3	1436.9	1954.2	1296.41	1469.94	1687.29	1239.31	1482.77		1820.75	0.69634	0.0070488	0.810852	0.189224	TRUE
Q96SI1-1	Q96SI1	BTB/POZ domain-containing protein KCTD15 [OS=Homo sapiens]	KCTD15	potassium channel tetramerization domain containing 15(KCTD15)	0	20.648	26	6	9	4	1	283	31.9	7.44	27.13	6	2	1479.4	1122.5	858.5	1666.4	1133.2	900.5	1479.4	1094.97	855.032	1559.72	1095.21	929.249		1519.56	0.720662	0.00674493	0.587104	0.00324972	TRUE
Q96K12	Q96K12	Fatty acyl-CoA reductase 2 [OS=Homo sapiens]	FAR2	fatty acyl-CoA reductase 2(FAR2)	0.004	6.18	3	2	3	2	1	515	59.4	9.38	7.6	2	0	178.8	123.2	109.1	177.6	128.7	91.7	178.8	120.178	108.659	166.23	124.385	94.6276		172.515	0.708818	0.030491	0.589185	0.00811156	TRUE
P34913-1	P34913	Bifunctional epoxide hydrolase 2 [OS=Homo sapiens]	EPHX2	epoxide hydrolase 2(EPHX2)	0	194.952	62	24	133	24	1	555	62.6	6.28	433.86	24	0	14646	10539.1	11118	15265.7	10258.3	11236.8	14646	10280.6	11073.1	14288.4	9914.39	11595.5		14467.2	0.697958	0.000407597	0.783449	0.102246	TRUE
P53396-2	P53396	Isoform 2 of ATP-citrate synthase [OS=Homo sapiens]	ACLY	ATP citrate lyase(ACLY)	0	563.776	63	60	443	1	1	1091	119.7	7.33	1358.41	60	0	245.6	260.3	289	484.5	243.1	235.5	245.6	253.916	287.833	453.483	234.95	243.019		349.542	0.699296	0.0186283	0.759353	0.114057	TRUE
Q9HAW0	Q9HAW0	Transcription factor IIIB 50 kDa subunit [OS=Homo sapiens]	BRF2	BRF2, RNA polymerase III transcription initiation factor 50 kDa subunit(BRF2)	0	21.426	16	5	8	5	1	419	46.5	7.94	28.26	5	0	879.6	724.4	519.1	945.3	792.1	506.9	879.6	706.634	517.003	884.784	765.545	523.083		882.192	0.834387	0.164428	0.58949	0.0122647	TRUE
Q9HAD4	Q9HAD4	WD repeat-containing protein 41 [OS=Homo sapiens]	WDR41	WD repeat domain 41(WDR41)	0	52.131	28	11	29	11	1	459	51.7	5.44	86.98	11	0	2810.6	1970.1	2536.7	2973	2063	2353.8	2810.6	1921.78	2526.45	2782.67	1993.84	2428.95		2796.64	0.700059	0.00355608	0.885957	0.36322	TRUE
Q9NS91	Q9NS91	E3 ubiquitin-protein ligase RAD18 [OS=Homo sapiens]	RAD18	RAD18, E3 ubiquitin protein ligase(RAD18)	0	88.289	36	17	30	17	1	495	56.2	7.58	107.75	17	0	4613.9	3872.5	2687.5	4804.8	3976.2	2617.9	4613.9	3777.53	2676.64	4497.21	3842.9	2701.48		4555.55	0.836389	0.129847	0.590282	0.00111162	TRUE
P31146	P31146	Coronin-1A [OS=Homo sapiens]	coro1a	coronin 1A(CORO1A)	0	66.581	28	11	51	9	1	461	51	6.68	95.95	11	1	2148.3	1583.8	2033.4	2377.7	1576.7	2043.8	2148.3	1544.96	2025.19	2225.48	1523.84	2109.05		2186.89	0.701635	0.00384892	0.945231	0.742971	TRUE
Q14999-2	Q14999	Isoform 2 of Cullin-7 [OS=Homo sapiens]	CUL7	cullin 7(CUL7)	0	68.286	10	14	26	12	1	1782	199.6	5.97	99.2	14	2	2747.4	1966.2	2249.2	2871.9	1963.5	2321.1	2747.4	1917.98	2240.11	2688.05	1897.67	2395.2		2717.72	0.701994	0.00389141	0.852794	0.346537	TRUE
Q9ULP9	Q9ULP9	TBC1 domain family member 24 [OS=Homo sapiens]	TBC1D24	TBC1 domain family member 24(TBC1D24)	0	51.49	23	13	18	13	1	559	62.9	7.36	64.53	13	0	1963	1430.9	1770.7	2076.5	1394.3	1730.2	1963	1395.81	1763.55	1943.57	1347.56	1785.44		1953.28	0.702244	0.00821338	0.908467	0.50722	TRUE
Q5T7B8-1	Q5T7B8	Kinesin-like protein KIF24 [OS=Homo sapiens]	KIF24	kinesin family member 24(KIF24)	0.001	10.144	3	3	3	3	1	1368	151.8	7.14	8.94	3	0	90.5	60.6	67.4	84.7	62.2	65.6	90.5	59.1138	67.1277	79.2777	60.1148	67.6943		84.8888	0.702263	0.0271879	0.794109	0.151387	TRUE
Q9P1Z2-1	Q9P1Z2	Calcium-binding and coiled-coil domain-containing protein 1 [OS=Homo sapiens]	CALCOCO1	calcium binding and coiled-coil domain 1(CALCOCO1)	0	64.53	20	10	20	10	1	691	77.3	4.82	76.13	10	0	1978	1414.4	1641.9	2136.6	1466	1700.3	1978	1379.71	1635.27	1999.82	1416.85	1754.58		1988.91	0.70304	0.00838279	0.852188	0.299387	TRUE
P04818	P04818	thymidylate synthase [OS=Homo sapiens]	TYMS	thymidylate synthetase(TYMS)	0	127.054	56	13	54	13	1	313	35.7	7.01	197.16	13	0	6263	6044.8	3715.7	7242.5	5395.7	3896.2	6263	5896.55	3700.69	6778.85	5214.81	4020.59		6520.92	0.851977	0.135333	0.592039	0.00122496	TRUE
P04114	P04114	apolipoprotein B-100 [OS=Homo sapiens]	APOB	apolipoprotein B(APOB)	0	14.249	1	6	9	5	1	4563	515.3	7.05	21.19	6	0	992.1	726.4	759.6	1041.8	700.6	716.6	992.1	708.585	756.531	975.106	677.113	739.478		983.603	0.704399	0.00703046	0.760474	0.110872	TRUE
P49006	P49006	MARCKS-related protein [OS=Homo sapiens]	MARCKSL1	MARCKS like 1(MARCKSL1)	0	76.228	74	7	24	7	1	195	19.5	4.67	135.98	7	0	1881.8	1453.5	1718.4	2223.9	1421.9	1668.5	1881.8	1417.85	1711.46	2081.53	1374.23	1721.77		1981.67	0.704479	0.00869733	0.866248	0.345082	TRUE
Q86SF2	Q86SF2	N-acetylgalactosaminyltransferase 7 [OS=Homo sapiens]	GALNT7	polypeptide N-acetylgalactosaminyltransferase 7(GALNT7)	0	84.07	30	16	40	16	1	657	75.3	7.11	150.74	16	0	4005	3019.6	3681.7	4641.2	3051.9	3759.6	4005	2945.54	3666.83	4344.08	2949.59	3879.63		4174.54	0.706081	0.00126373	0.903867	0.495315	TRUE
Q8TEA7	Q8TEA7	TBC domain-containing protein kinase-like protein [OS=Homo sapiens]	TBCK	TBC1 domain containing kinase(TBCK)	0	31.465	8	6	13	6	1	893	100.6	6.58	37.93	6	0	837.3	596.4	649	852.9	593.1	615.6	837.3	581.773	646.378	798.299	573.216	635.254		817.8	0.706157	0.0147808	0.783586	0.168801	TRUE
Q8NE65	Q8NE65	Protein ZNF738 [OS=Homo sapiens]	ZNF738	zinc finger protein 738(ZNF738)	0.001	7.627	7	1	3	1	1	137	15.9	5.1	9.5	1	0	266.4	176	219.4	254.8	191.8	183.9	266.4	171.684	218.514	238.488	185.37	189.771		252.444	0.707193	0.00424158	0.808664	0.171837	TRUE
Q9UEY8-1	Q9UEY8	Gamma-adducin [OS=Homo sapiens]	ADD3	adducin 3(ADD3)	0	132.942	34	21	52	20	1	706	79.1	6.32	194.17	21	0	5231.5	3656.9	5604.3	5391.1	3841.1	5241.4	5231.5	3567.21	5581.66	5045.97	3712.33	5408.74		5138.74	0.708301	0.00734211	1.06937	0.631733	FALSE
Q86Y79	Q86Y79	Probable peptidyl-tRNA hydrolase [OS=Homo sapiens]	PTRH1	peptidyl-tRNA hydrolase 1 homolog(PTRH1)	0	23.096	28	5	9	5	1	214	22.9	10.56	28.98	5	0	823.5	618.4	682.7	936.3	621.9	737.9	823.5	603.234	679.942	876.36	601.051	761.458		849.93	0.708461	0.0155681	0.847952	0.316405	TRUE
Q8IYB3	Q8IYB3	Serine/arginine repetitive matrix protein 1 [OS=Homo sapiens]	SRRM1	serine and arginine repetitive matrix 1(SRRM1)	0	80.461	16	13	32	13	1	904	102.3	11.84	129.21	13	0	7479.7	4665.8	4372.6	8103.4	4537.6	4453.3	7479.7	4551.37	4354.94	7584.64	4385.48	4595.48		7532.17	0.593245	4.13163e-05	0.594146	0.0031061	TRUE
Q7L4I2-1	Q7L4I2	Arginine/serine-rich coiled-coil protein 2 [OS=Homo sapiens]	RSRC2	arginine and serine rich coiled-coil 2(RSRC2)	0	39.692	16	5	15	5	1	434	50.5	11.33	39.31	5	0	2320.9	1339	1352.9	2317.1	1351.7	1281.4	2320.9	1306.16	1347.43	2168.76	1306.38	1322.31		2244.83	0.581902	5.357e-05	0.594642	0.00794463	TRUE
O94925-3	O94925	Isoform 3 of Glutaminase kidney isoform, mitochondrial [OS=Homo sapiens]	GLS	glutaminase(GLS)	0	168.762	48	23	53	4	1	598	65.4	7.88	229.61	23	19	9170.5	6822.3	9338.9	10111	6795	8935	9170.5	6654.98	9301.17	9463.71	6567.2	9220.26		9317.11	0.709565	0.000920139	0.993948	0.890699	TRUE
Q9UNS1	Q9UNS1	Protein timeless homolog [OS=Homo sapiens]	TIMELESS	timeless circadian clock(TIMELESS)	0	152.508	31	28	56	28	1	1208	138.6	5.4	191.61	28	0	4702.4	4527.7	2848.6	5022.4	4605.8	2683.6	4702.4	4416.66	2837.09	4700.88	4451.39	2769.28		4701.64	0.943081	0.586926	0.596214	0.00132102	TRUE
Q86W11-1	Q86W11	Zinc finger and SCAN domain-containing protein 30 [OS=Homo sapiens]	ZSCAN30	zinc finger and SCAN domain containing 30(ZSCAN30)	0.001	11.898	6	2	3	1	1	494	56.3	6.7	8.26	2	0	14.9	13.6	12.9	16.4	8.5	13.3	14.9	13.2665	12.8479	15.3501	8.21504	13.7246		15.1251	0.71013	0.012643	0.878427	0.315992	TRUE
P49137	P49137	MAP kinase-activated protein kinase 2 [OS=Homo sapiens]	MAPKAPK2	mitogen-activated protein kinase-activated protein kinase 2(MAPKAPK2)	0	70.092	40	15	37	14	1	400	45.5	8.68	125.91	15	1	4388.6	3548	3727.8	5339	3316.8	3792.5	4388.6	3460.98	3712.74	4997.21	3205.61	3913.58		4692.9	0.710284	0.007748	0.812537	0.157066	TRUE
Q9UK22	Q9UK22	F-box only protein 2 [OS=Homo sapiens]	FBXO2	F-box protein 2(FBXO2)	0	16.345	15	3	4	3	1	296	33.3	4.37	14.79	3	0	477.1	305.4	397.5	441.5	346.3	399.2	477.1	297.91	395.894	413.236	334.69	411.945		445.168	0.710519	0.0234928	0.907342	0.505187	TRUE
Q9BRK5-1	Q9BRK5	45 kDa calcium-binding protein [OS=Homo sapiens]	SDF4	stromal cell derived factor 4(SDF4)	0	110.734	52	14	40	14	1	362	41.8	4.86	133.25	14	0	4249.5	3084.5	3756	4576.3	3163.6	3540.5	4249.5	3008.85	3740.83	4283.33	3057.54	3653.53		4266.42	0.710947	0.0078881	0.866577	0.333917	TRUE
O14508	O14508	Suppressor of cytokine signaling 2 [OS=Homo sapiens]	SOCS2	suppressor of cytokine signaling 2(SOCS2)	0	22.134	26	5	11	5	1	198	22.2	8.69	41.42	5	0	1698.3	1161.5	2010.8	1748.1	1283.1	1824.7	1698.3	1133.01	2002.68	1636.19	1240.08	1882.96		1667.25	0.711682	0.0104351	1.16529	0.360381	FALSE
Q9HAC7-3	Q9HAC7	Isoform 3 of Succinate--hydroxymethylglutarate CoA-transferase [OS=Homo sapiens]	SUGCT	succinyl-CoA:glutarate-CoA transferase(SUGCT)	0.003	6.724	3	1	3	1	1	471	51.2	8.5	5.19	1	0	32.2	36.5	19.9	36	32.4	18.9	32.2	35.6048	19.8196	33.6954	31.3138	19.5034		32.9477	1.01553	0.968361	0.596749	0.00756988	FALSE
O94941-1	O94941	RING finger protein 37 [OS=Homo sapiens]	UBOX5	U-box domain containing 5(UBOX5)	0	40.702	23	8	10	8	1	541	58.9	7.56	40.04	8	0	1064.1	754.7	976.1	1117.7	793.4	937.7	1064.1	736.191	972.157	1046.15	766.801	967.637		1055.12	0.712235	0.00860799	0.919226	0.527913	TRUE
Q9Y546	Q9Y546	Leucine-rich repeat-containing protein 42 [OS=Homo sapiens]	LRRC42	leucine rich repeat containing 42(LRRC42)	0	24.018	18	7	10	7	1	428	48.5	7.46	27.99	7	0	1493.9	1006.3	913.7	1691.6	1045.2	900.6	1493.9	981.62	910.009	1583.31	1010.16	929.352		1538.6	0.647269	0.00064649	0.597737	0.00412452	TRUE
Q9H3S7	Q9H3S7	Tyrosine-protein phosphatase non-receptor type 23 [OS=Homo sapiens]	PTPN23	protein tyrosine phosphatase, non-receptor type 23(PTPN23)	0	276.726	34	47	110	47	1	1636	178.9	6.92	375.11	47	0	14393.5	10609.5	17063.6	15526.3	10676.5	16689	14393.5	10349.3	16994.7	14532.3	10318.6	17221.8		14462.9	0.714512	0.000843643	1.1829	0.105606	FALSE
Q86V59	Q86V59	PNMA-like protein 1 [OS=Homo sapiens]	PNMAL1	paraneoplastic Ma antigen family like 1(PNMAL1)	0	49.868	30	9	13	9	1	439	48.1	8.97	47.51	9	0	987.5	716.6	904.6	1034.6	723.6	827.7	987.5	699.025	900.946	968.367	699.341	854.125		977.933	0.71496	0.00922651	0.897336	0.444873	TRUE
O15042	O15042	U2 snRNP-associated SURP motif-containing protein [OS=Homo sapiens]	U2SURP	U2 snRNP associated SURP domain containing(U2SURP)	0	298.723	43	40	144	1	1	1029	118.2	8.47	474.77	40	0	48.9	35.8	34.9	49.5	34.4	37.1	48.9	34.922	34.759	46.3311	33.2467	38.2845		47.6156	0.715824	0.0144442	0.767013	0.0964197	TRUE
Q8WVD3-1	Q8WVD3	E3 ubiquitin-protein ligase RNF138 [OS=Homo sapiens]	RNF138	ring finger protein 138(RNF138)	0	26.395	31	6	14	6	1	245	28.2	6.93	42.07	6	0	915.4	643.6	696.9	920.5	667.2	623	915.4	627.815	694.085	861.571	644.832	642.89		888.486	0.716189	0.0184847	0.752389	0.11937	TRUE
Q86UB9	Q86UB9	transmembrane protein 135 [OS=Homo sapiens]	TMEM135	transmembrane protein 135(TMEM135)	0.001	9.729	6	4	8	4	1	458	52.3	9.45	15.96	4	0	376.1	283.4	281.6	428.4	290.2	254.5	376.1	276.45	280.462	400.975	280.471	262.625		388.537	0.716689	0.0266105	0.698887	0.0507476	TRUE
Q9UEE9-1	Q9UEE9	Craniofacial development protein 1 [OS=Homo sapiens]	CFDP1	craniofacial development protein 1(CFDP1)	0	44.006	27	7	15	7	1	299	33.6	4.81	55.32	7	0	2782.8	1977.1	1932	2807	2018.1	1978.9	2782.8	1928.61	1924.2	2627.3	1950.44	2042.08		2705.05	0.717002	0.00609203	0.733124	0.0826598	TRUE
O15228	O15228	Dihydroxyacetone phosphate acyltransferase [OS=Homo sapiens]	GNPAT	glyceronephosphate O-acyltransferase(GNPAT)	0	131.503	37	22	44	22	1	680	77.1	6.57	185.69	22	0	8025	5804.2	6449.6	8598.5	6066.7	6485	8025	5661.85	6423.55	8048.04	5863.32	6692.04		8036.52	0.717049	0.00478903	0.815999	0.205881	TRUE
Q96FV2	Q96FV2	Secernin-2 [OS=Homo sapiens]	SCRN2	secernin 2(SCRN2)	0	20.426	18	5	7	5	1	425	46.6	5.67	22.63	5	0	911.6	707.3	807.5	1048.8	694.3	836.6	911.6	689.953	804.238	981.658	671.024	863.309		946.629	0.718855	0.0195961	0.880782	0.417354	TRUE
Q9BY77	Q9BY77	Polymerase delta-interacting protein 3 [OS=Homo sapiens]	POLDIP3	DNA polymerase delta interacting protein 3(POLDIP3)	0	142.427	55	19	68	3	1	421	46.1	9.99	236.8	19	16	6260.4	4642.7	5566	6880.4	4761.2	5310.6	6260.4	4528.84	5543.51	6439.93	4601.58	5480.15		6350.17	0.718912	0.00342369	0.867982	0.348593	TRUE
Q07157-2	Q07157	Isoform Short of Tight junction protein ZO-1 [OS=Homo sapiens]	TJP1	tight junction protein 1(TJP1)	0	332.198	45	58	111	1	1	1668	186.9	6.79	400.17	58	0	236.3	183.1	240	266	176.4	214.1	236.3	178.609	239.03	248.971	170.486	220.935		242.636	0.719383	0.00614237	0.947853	0.5902	TRUE
Q7L3V2	Q7L3V2	Protein Bop [OS=Homo sapiens]	C22orf29	chromosome 22 open reading frame 29(C22orf29)	0	58.72	35	6	27	6	1	364	39.3	5.05	89.42	6	0	1110.8	918.8	637.6	1189.9	884.4	675.4	1110.8	896.266	635.024	1113.72	854.751	696.963		1112.26	0.787142	0.048181	0.598774	0.0100163	TRUE
Q8NC96	Q8NC96	adaptin ear-binding coat-associated protein 1 [OS=Homo sapiens]	NECAP1	NECAP endocytosis associated 1(NECAP1)	0	54.147	42	11	16	10	1	275	29.7	6.8	62.19	11	1	3581.7	2599.2	3953.3	3585.1	2543.8	3869	3581.7	2535.45	3937.33	3355.59	2458.52	3992.52		3468.64	0.719874	0.00208893	1.14308	0.456649	FALSE
Q99504	Q99504	eyes absent homolog 3 [OS=Homo sapiens]	EYA3	EYA transcriptional coactivator and phosphatase 3(EYA3)	0	50.54	13	6	23	6	1	573	62.6	5.21	93.58	6	0	2032.7	1401.1	1519.6	2096.8	1562.9	1458.5	2032.7	1366.74	1513.46	1962.57	1510.5	1505.06		1997.63	0.720163	0.0128715	0.755525	0.0927395	TRUE
O75865-2	O75865	Isoform 2 of Trafficking protein particle complex subunit 6A [OS=Homo sapiens]	TRAPPC6A	trafficking protein particle complex 6A(TRAPPC6A)	0.001	7.481	14	3	3	3	1	173	18.9	5.31	6.83	3	0	823.6	477	460.7	820.9	489.6	482.1	823.6	465.301	458.839	768.348	473.186	497.491		795.974	0.589522	0.000697979	0.60073	0.0147242	TRUE
Q99717	Q99717	mothers against decapentaplegic homolog 5 [OS=Homo sapiens]	SMAD5	SMAD family member 5(SMAD5)	0	33.173	24	10	15	9	1	465	52.2	7.71	36.3	10	1	1716.1	1744.4	1092.2	1948.5	1777.4	1009	1716.1	1701.62	1087.79	1823.76	1717.81	1041.21		1769.93	0.965979	0.727042	0.601436	0.00679543	TRUE
Q9NX45-3	Q9NX45	Isoform 3 of Spermatogenesis- and oogenesis-specific basic helix-loop-helix-containing protein 2 [OS=Homo sapiens]	SOHLH2	spermatogenesis and oogenesis specific basic helix-loop-helix 2(SOHLH2)	0.008	4.31	2	1	1	1	1	502	56.2	7.39	4.08	1	0	50.3	32.5	32.5	65.7	28.5	33.9	50.3	31.7029	32.3687	61.494	27.5445	34.9823		55.897	0.52997	6.30549e-05	0.602456	0.00836718	TRUE
Q16763	Q16763	ubiquitin-conjugating enzyme E2 S [OS=Homo sapiens]	UBE2S	ubiquitin conjugating enzyme E2 S(UBE2S)	0	96.901	64	10	36	10	1	222	23.8	8.38	167.47	10	0	4990.6	4543.6	2974.5	5150.6	4495.8	2859.2	4990.6	4432.17	2962.48	4820.87	4345.08	2950.48		4905.73	0.89459	0.324727	0.602659	0.00158932	TRUE
P13051	P13051	uracil-DNA glycosylase [OS=Homo sapiens]	UNG	uracil DNA glycosylase(UNG)	0	19.741	24	5	8	5	1	313	34.6	9.32	21.63	5	0	975.9	883.2	608.8	1121.4	863.4	596.7	975.9	861.539	606.341	1049.61	834.455	615.75		1012.76	0.837317	0.123709	0.60335	0.0108497	TRUE
Q8IWX8	Q8IWX8	Calcium homeostasis endoplasmic reticulum protein [OS=Homo sapiens]	CHERP	calcium homeostasis endoplasmic reticulum protein(CHERP)	0	205.671	35	25	100	25	1	916	103.6	9.04	311.52	25	0	14147.7	9121.8	8422.3	14455.2	9211	8098	14147.7	8898.08	8388.28	13529.8	8902.2	8356.54		13838.8	0.643132	2.81751e-05	0.604997	0.00096989	TRUE
P38606	P38606	V-type proton ATPase catalytic subunit A [OS=Homo sapiens]	ATP6V1A	ATPase H+ transporting V1 subunit A(ATP6V1A)	0	413.045	78	40	217	40	1	617	68.3	5.52	744.65	40	0	25701	19032.4	26186.1	27246	19121.9	24787.8	25701	18565.6	26080.3	25501.8	18480.8	25579.2		25601.4	0.723525	0.000330241	1.00892	0.818917	FALSE
Q9NPA3	Q9NPA3	Mid1-interacting protein 1 [OS=Homo sapiens]	MID1IP1	MID1 interacting protein 1(MID1IP1)	0	74.769	82	8	26	8	1	183	20.2	5.5	90.24	8	0	3158.8	2324.3	2557.2	3354.2	2374.5	2414.8	3158.8	2267.3	2546.87	3139.47	2294.9	2491.89		3149.14	0.724356	0.00726995	0.800023	0.122808	TRUE
O00192	O00192	armadillo repeat protein deleted in velo-cardio-facial syndrome [OS=Homo sapiens]	arvcf	armadillo repeat gene deleted in velocardiofacial syndrome(ARVCF)	0	68.166	21	15	29	15	1	962	104.6	6.81	89.35	15	0	2641.5	2154.4	1575.8	2827	2186.6	1579.4	2641.5	2101.56	1569.43	2646.02	2113.29	1629.82		2643.76	0.797133	0.048417	0.605058	0.00972957	TRUE
Q8IW92	Q8IW92	Beta-galactosidase-1-like protein 2 [OS=Homo sapiens]	GLB1L2	galactosidase beta 1 like 2(GLB1L2)	0.007	4.889	2	2	2	2	1	636	72	7.62	4.82	2	0	180.9	180.7	154.1	271.3	143.8	160.9	180.9	176.268	153.477	253.932	138.979	166.037		217.416	0.724987	0.00725023	0.7348	0.0709799	TRUE
Q14469	Q14469	Transcription factor HES-1 [OS=Homo sapiens]	HES1	hes family bHLH transcription factor 1(HES1)	0	17.527	15	3	5	3	1	280	29.5	9.61	15.52	3	0	772.1	622.6	566.7	933.3	607.9	579.8	772.1	607.331	564.411	873.552	587.52	598.311		822.826	0.726065	0.0229002	0.706541	0.068158	TRUE
O60825-2	O60825	Isoform 2 of 6-phosphofructo-2-kinase/fructose-2,6-bisphosphatase 2 [OS=Homo sapiens]	PFKFB2	6-phosphofructo-2-kinase/fructose-2,6-biphosphatase 2(PFKFB2)	0	172.26	62	28	69	1	1	471	54.4	7.56	231.08	28	0	270.1	212.8	164.3	287.4	206.2	158.7	270.1	207.581	163.636	269.001	199.287	163.767		269.551	0.754716	0.0166838	0.607313	0.0103536	TRUE
Q8NHZ8	Q8NHZ8	Anaphase-promoting complex subunit CDC26 [OS=Homo sapiens]	CDC26	cell division cycle 26(CDC26)	0	42.856	72	7	12	7	1	85	9.8	6.81	48.06	7	0	1982	1503.6	1696.2	2108.7	1460.2	1635.2	1982	1466.72	1689.35	1973.71	1411.25	1687.41		1977.85	0.727549	0.0153908	0.853641	0.303913	TRUE
P50851-1	P50851	Lipopolysaccharide-responsive and beige-like anchor protein [OS=Homo sapiens]	LRBA	LPS responsive beige-like anchor protein(LRBA)	0	476.281	37	78	197	2	1	2863	318.9	5.6	674.3	78	76	24478	18275.3	21251.8	25886.4	18232.1	20848.3	24478	17827.1	21165.9	24229.2	17620.9	21513.9		24353.6	0.727777	0.000405125	0.876253	0.319091	TRUE
Q9Y2Q3-1	Q9Y2Q3	Glutathione S-transferase kappa 1 [OS=Homo sapiens]	GSTK1	glutathione S-transferase kappa 1(GSTK1)	0	124.628	66	13	129	13	1	226	25.5	8.41	347.41	13	0	18322.8	13227.1	15582.1	18964	13816.7	15719.1	18322.8	12902.7	15519.2	17750	13353.5	16220.9		18036.4	0.727868	0.00147738	0.879891	0.462829	TRUE
P15941-2	P15941	Isoform 2 of Mucin-1 [OS=Homo sapiens]	MUC1	mucin 1, cell surface associated(MUC1)	0.006	5.235	2	2	2	2	1	1264	122.9	7.56	4.69	2	0	29.9	24.6	37.7	36.3	23.3	38.3	29.9	23.9967	37.5477	33.9761	22.5189	39.5228		31.9381	0.728215	0.0191626	1.20656	0.488802	FALSE
Q9Y3Z3	Q9Y3Z3	deoxynucleoside triphosphate triphosphohydrolase SAMHD1 [OS=Homo sapiens]	SAMHD1	SAM and HD domain containing deoxynucleoside triphosphate triphosphohydrolase 1(SAMHD1)	0	154.291	48	23	56	23	1	626	72.2	7.14	192.18	23	0	9030.5	6627.8	6767.3	9235.9	6634	6545.4	9030.5	6465.25	6739.96	8644.64	6411.6	6754.37		8837.57	0.728529	0.00688635	0.763464	0.0957823	TRUE
P62987	P62987	Ubiquitin-60S ribosomal protein L40 [OS=Homo sapiens]	UBA52	ubiquitin A-52 residue ribosomal protein fusion product 1(UBA52)	0	68.526	47	9	110	2	1	128	14.7	9.83	347.25	9	0	191.4	190.5	221.2	474	187.9	160.6	191.4	185.828	220.306	443.655	181.601	165.727		317.528	0.578577	0.000984982	0.607874	0.0118818	TRUE
P50225	P50225	Sulfotransferase 1A1 [OS=Homo sapiens]	SULT1A1	sulfotransferase family 1A member 1(SULT1A1)	0	65.678	45	13	34	6	1	295	34.1	6.62	101.53	13	0	3874.9	2895.5	3864.3	4038	2848.2	3877.7	3874.9	2824.49	3848.69	3779.5	2752.71	4001.5		3827.2	0.728627	0.00284394	1.02558	0.927251	FALSE
Q9UPU5	Q9UPU5	Ubiquitin carboxyl-terminal hydrolase 24 [OS=Homo sapiens]	USP24	ubiquitin specific peptidase 24(USP24)	0	342.586	28	61	157	60	1	2620	294.2	6.14	482.69	61	0	24644.3	17676.8	19192.9	24735.2	18208.3	18190.5	24644.3	17243.3	19115.4	23151.7	17597.9	18771.2	Acetyl [N-Term]	23898	0.728955	0.00042853	0.792673	0.0633952	TRUE
Q4VC31	Q4VC31	coiled-coil domain-containing protein 58 [OS=Homo sapiens]	CCDC58	coiled-coil domain containing 58(CCDC58)	0	61.118	47	6	44	6	1	144	16.6	7.81	145.62	6	0	5665.6	4901.9	4534.2	6928	4232.1	4931.6	5665.6	4781.68	4515.88	6484.48	4090.22	5089.05		6075.04	0.730192	0.00502593	0.790524	0.113711	TRUE
Q8IYN2	Q8IYN2	transcription elongation factor A protein-like 8 [OS=Homo sapiens]	TCEAL8	transcription elongation factor A like 8(TCEAL8)	0	31.763	78	7	10	7	1	117	13.6	5.39	36.22	7	0	693.9	522.2	726.7	747	525.7	658.4	693.9	509.393	723.764	699.179	508.076	679.42		696.539	0.730374	0.0273722	1.00725	0.930431	FALSE
Q6KCM7-3	Q6KCM7	Isoform 3 of Calcium-binding mitochondrial carrier protein SCaMC-2 [OS=Homo sapiens]	SLC25A25	solute carrier family 25 member 25(SLC25A25)	0	60.507	22	11	24	11	1	515	56.8	8.46	73.33	11	0	2068.7	1592.7	2271.4	2345.8	1615.7	2255	2068.7	1553.64	2262.22	2195.63	1561.53	2326.99		2132.16	0.730519	0.00897382	1.07619	0.642123	FALSE
Q8IXJ6	Q8IXJ6	NAD-dependent protein deacetylase sirtuin-2 [OS=Homo sapiens]	SIRT2	sirtuin 2(SIRT2)	0	72.753	35	12	31	12	1	389	43.2	5.36	103.47	12	0	4992.2	3697.5	4135.5	5196.2	3720.8	4185.4	4992.2	3606.82	4118.79	4863.55	3596.06	4319.02		4927.87	0.73083	0.0132942	0.856131	0.292342	TRUE
O15066	O15066	Kinesin-like protein KIF3B [OS=Homo sapiens]	KIF3B	kinesin family member 3B(KIF3B)	0	72.452	25	15	21	9	1	747	85.1	7.69	81.34	15	6	3388.3	2515.3	4293	3567.8	2553.7	4050.4	3388.3	2453.61	4275.66	3339.4	2468.09	4179.71		3363.85	0.731558	0.008902	1.2568	0.14368	FALSE
Q8IVH2-1	Q8IVH2	Forkhead box protein P4 [OS=Homo sapiens]	FOXP4	forkhead box P4(FOXP4)	0	59.037	33	11	17	10	1	680	73.4	6.4	49.9	11	0	1157.9	1056.9	739.8	1281.5	1053.4	676.5	1157.9	1030.98	736.811	1199.46	1018.09	698.098		1178.68	0.86922	0.206975	0.608693	0.0119003	TRUE
Q9UK76	Q9UK76	Jupiter microtubule associated homolog 1 [OS=Homo sapiens]	HN1	hematological and neurological expressed 1(HN1)	0	103.656	79	8	117	8	1	154	16	5.6	473.39	8	0	8413	6208.3	10026.9	8761.8	6344.3	9551.8	8413	6056.04	9986.39	8200.89	6131.61	9856.75		8306.94	0.733582	0.00804718	1.19437	0.167556	FALSE
Q8NCN5	Q8NCN5	Pyruvate dehydrogenase phosphatase regulatory subunit, mitochondrial [OS=Homo sapiens]	PDPR	pyruvate dehydrogenase phosphatase regulatory subunit(PDPR)	0	85.814	28	19	34	19	1	879	99.3	6.35	105.91	19	0	4533.7	3441	5035.8	5050.6	3560.1	5297.9	4533.7	3356.61	5015.46	4727.27	3440.75	5467.04		4630.49	0.733979	0.0144002	1.1319	0.408774	FALSE
Q6P4I2	Q6P4I2	WD repeat-containing protein 73 [OS=Homo sapiens]	WDR73	WD repeat domain 73(WDR73)	0	24.153	21	6	11	6	1	378	41.7	5.78	33.47	6	0	1692.7	1276.8	1456.8	1768.5	1254	1439.1	1692.7	1245.49	1450.91	1655.28	1211.96	1485.04		1673.99	0.734008	0.0179391	0.876934	0.382636	TRUE
Q9H9Z2	Q9H9Z2	Protein lin-28 homolog A [OS=Homo sapiens]	LIN28A	lin-28 homolog A(LIN28A)	0.001	9.592	12	2	4	1	1	209	22.7	8.07	8.92	2	0	49	46.8	34.5	60.9	33.3	44.6	49	45.6522	34.3606	57.0013	32.1836	46.0239		53.0007	0.734291	0.021934	0.758335	0.0865567	TRUE
Q5VU43-3	Q5VU43	Isoform 3 of Myomegalin [OS=Homo sapiens]	PDE4DIP	phosphodiesterase 4D interacting protein(PDE4DIP)	0	115.791	14	25	36	24	1	2240	253.9	5.36	117.54	25	0	3644.3	2643.7	3531.3	3675.5	2715.2	3405.7	3644.3	2578.86	3517.03	3440.2	2624.17	3514.43		3542.25	0.734425	0.00347331	0.992514	0.914185	TRUE
O15321-1	O15321	Transmembrane 9 superfamily member 1 [OS=Homo sapiens]	TM9SF1	transmembrane 9 superfamily member 1(TM9SF1)	0	26.164	14	5	17	5	1	606	68.8	7.17	52.7	5	0	1143	833.2	1096.6	1217.9	894.7	1139.6	1143	812.765	1092.17	1139.93	864.705	1175.98		1141.47	0.734788	0.0150531	0.993526	0.856805	TRUE
Q8IXI2-7	Q8IXI2	Isoform 7 of Mitochondrial Rho GTPase 1 [OS=Homo sapiens]	RHOT1	ras homolog family member T1(RHOT1)	0	108.802	36	19	34	1	1	659	75.5	6.74	132.94	19	0	15.7	13.4	20	21.2	13.5	13.2	15.7	13.0714	19.9192	19.8428	13.0474	13.6214		17.7714	0.734854	0.0222074	0.943668	0.537629	TRUE
Q12962	Q12962	transcription initiation factor TFIID subunit 10 [OS=Homo sapiens]	TAF10	TATA-box binding protein associated factor 10(TAF10)	0	41.629	35	5	19	5	1	218	21.7	6.57	101.53	5	0	1659.8	1196.3	1625.5	1720.8	1283.9	1493.5	1659.8	1166.96	1618.93	1610.64	1240.86	1541.18		1635.22	0.736237	0.0104617	0.966267	0.777148	TRUE
P00918	P00918	Carbonic anhydrase 2 [OS=Homo sapiens]	CA2	carbonic anhydrase 2(CA2)	0.001	7.511	8	2	4	2	1	260	29.2	7.4	12.33	2	0	508	397.2	610.4	556.8	385.6	630.2	508	387.459	607.934	521.155	372.673	650.32		514.577	0.738598	0.0323396	1.22261	0.249645	FALSE
Q9NSK0-3	Q9NSK0	Isoform 3 of Kinesin light chain 4 [OS=Homo sapiens]	KLC4	kinesin light chain 4(KLC4)	0	142.188	50	27	74	18	1	637	70.5	6.34	238.71	27	2	4727.9	3557.5	4079.3	4914.5	3540.8	4015.9	4727.9	3470.25	4062.82	4599.88	3422.1	4144.11		4663.89	0.738905	0.0162937	0.879837	0.391919	TRUE
O15397-1	O15397	Importin-8 [OS=Homo sapiens]	IPO8	importin 8(IPO8)	0	126.943	25	21	45	20	1	1037	119.9	5.16	153.83	21	0	5819.5	5650	3539	6278.9	5647.8	3493.4	5819.5	5511.43	3524.7	5876.94	5458.46	3604.93		5848.22	0.937883	0.570069	0.609556	0.00202003	TRUE
P40855-1	P40855	Peroxisomal biogenesis factor 19 [OS=Homo sapiens]	PEX19	peroxisomal biogenesis factor 19(PEX19)	0	137.591	55	14	109	14	1	299	32.8	4.34	338.14	14	0	8827.8	6569.9	7548.4	9195.9	6717.9	7421.1	8827.8	6408.77	7517.91	8607.2	6492.68	7658.03		8717.5	0.739975	0.00976511	0.870429	0.395417	TRUE
Q9Y467	Q9Y467	sal-like protein 2 [OS=Homo sapiens]	sall2	spalt like transcription factor 2(SALL2)	0	65.713	16	11	22	11	1	1007	105.2	6.3	70.5	11	0	2240.9	1688.7	1826.4	2310.3	1668.1	1781.6	2240.9	1647.28	1819.02	2162.4	1612.18	1838.48		2201.65	0.740232	0.0117412	0.830627	0.276407	TRUE
P23297	P23297	Protein S100-A1 [OS=Homo sapiens]	S100A1	S100 calcium binding protein A1(S100A1)	0.003	6.348	23	1	1	1	1	94	10.5	4.5	5.8	1	0	87.5	66.7	93.4	89.6	64	119.2	87.5	65.0642	93.0227	83.864	61.8544	123.006		85.682	0.740637	0.0518388	1.26064	0.348388	FALSE
Q14161-10	Q14161	Isoform 10 of ARF GTPase-activating protein GIT2 [OS=Homo sapiens]	GIT2	GIT ArfGAP 2(GIT2)	0	94.423	37	17	26	1	1	681	76	7.46	97.86	17	0	16	9.9	15.2	13	11.6	8.5	16	9.6572	15.1386	12.1678	11.2111	8.77137		14.0839	0.740858	0.0253147	0.848841	0.23883	TRUE
Q8NF37	Q8NF37	Lysophosphatidylcholine acyltransferase 1 [OS=Homo sapiens]	LPCAT1	lysophosphatidylcholine acyltransferase 1(LPCAT1)	0	29.627	15	7	20	7	1	534	59.1	6.02	53.97	7	0	1081.2	877.4	829.1	1366.4	924.2	866.3	1081.2	855.881	825.751	1278.93	893.216	893.957		1180.06	0.741104	0.0174934	0.728651	0.0738817	TRUE
Q8IWS0-1	Q8IWS0	PHD finger protein 6 [OS=Homo sapiens]	PHF6	PHD finger protein 6(PHF6)	0	147.258	51	16	94	16	1	365	41.3	8.68	314.29	16	0	10729	8357.1	10901.7	11723.9	8223.5	10632.6	10729	8152.14	10857.7	10973.4	7947.81	10972.1		10851.2	0.741852	0.00323044	1.00587	0.82693	FALSE
Q5JS54-2	Q5JS54	Isoform 2 of Proteasome assembly chaperone 4 [OS=Homo sapiens]	PSMG4	proteasome assembly chaperone 4(PSMG4)	0	31.801	28	3	17	3	1	162	17.6	6.25	52.44	3	0	1106.4	853	794.2	1210.2	858.4	803.8	1106.4	832.08	790.992	1132.73	829.622	829.462		1119.56	0.742121	0.0179174	0.723699	0.0691582	TRUE
Q5T6F0	Q5T6F0	DDB1- and CUL4-associated factor 12 [OS=Homo sapiens]	DCAF12	DDB1 and CUL4 associated factor 12(DCAF12)	0	30.198	17	5	13	5	1	453	50.5	9.1	51.43	5	0	522	416.3	519.6	577.6	395.9	484.2	522	406.09	517.501	540.623	382.628	499.659		531.312	0.742236	0.034773	0.957216	0.694172	TRUE
Q96BK5	Q96BK5	PIN2/TERF1-interacting telomerase inhibitor 1 [OS=Homo sapiens]	PINX1	PIN2/TERF1 interacting, telomerase inhibitor 1(PINX1)	0	68.484	39	11	18	8	1	328	37	9.6	75.23	11	3	2917.3	2082.8	1730.6	2917.9	2384.9	1677.3	2917.3	2031.72	1723.61	2731.1	2304.95	1730.85		2824.2	0.767769	0.0231014	0.611582	0.00335648	TRUE
P53778	P53778	Mitogen-activated protein kinase 12 [OS=Homo sapiens]	MAPK12	mitogen-activated protein kinase 12(MAPK12)	0	19.192	18	5	6	4	1	367	41.9	6.39	20.05	5	0	267.9	214.6	208.3	312.6	214	185.9	267.9	209.337	207.459	292.588	206.826	191.835		280.244	0.7425	0.0119578	0.712403	0.0525257	TRUE
P78318	P78318	Immunoglobulin-binding protein 1 [OS=Homo sapiens]	IGBP1	immunoglobulin (CD79A) binding protein 1(IGBP1)	0	98.386	60	16	38	16	1	339	39.2	5.38	140.86	16	0	6631.8	4965.3	6678.2	6955.2	5089.8	6295.2	6631.8	4843.52	6651.22	6509.94	4919.17	6496.18		6570.87	0.742876	0.00761397	1.00043	0.889247	FALSE
Q6PID6	Q6PID6	Tetratricopeptide repeat protein 33 [OS=Homo sapiens]	TTC33	tetratricopeptide repeat domain 33(TTC33)	0	15.016	23	5	5	5	1	262	29.4	5.44	8.36	5	0	266.1	219.8	159.7	251.1	224.2	143.4	266.1	214.409	159.055	235.025	216.684	147.978		250.563	0.86025	0.174236	0.612687	0.011347	TRUE
Q99595	Q99595	Mitochondrial import inner membrane translocase subunit Tim17-A [OS=Homo sapiens]	TIMM17A	translocase of inner mitochondrial membrane 17 homolog A (yeast)(TIMM17A)	0.001	10.161	17	2	5	2	1	171	18	7.87	15.71	2	0	1034	839.5	700.6	1348.4	867.6	688.3	1034	818.911	697.77	1262.08	838.514	710.275		1148.04	0.72185	0.0109711	0.613239	0.0128641	TRUE
Q6DKK2	Q6DKK2	tetratricopeptide repeat protein 19, mitochondrial [OS=Homo sapiens]	TTC19	tetratricopeptide repeat domain 19(TTC19)	0	43.6	22	8	12	8	1	380	42.4	5.77	44.25	8	0	2295.6	1721	1729.8	2429.5	1779.4	1740.4	2295.6	1678.79	1722.81	2273.97	1719.75	1795.96		2284.78	0.743733	0.0129106	0.770046	0.136107	TRUE
Q01664	Q01664	Transcription factor AP-4 [OS=Homo sapiens]	TFAP4	transcription factor AP-4(TFAP4)	0	55.007	28	9	20	9	1	338	38.7	5.87	67.5	9	0	2430.2	2015.1	1491.2	2593.6	1967.7	1447.9	2430.2	1965.68	1485.18	2427.56	1901.73	1494.13		2428.88	0.79613	0.0473325	0.613307	0.0113882	TRUE
Q8NEZ5-1	Q8NEZ5	F-box only protein 22 [OS=Homo sapiens]	FBXO22	F-box protein 22(FBXO22)	0	61.132	23	8	17	8	1	403	44.5	7.03	74.89	8	0	1612.7	1215.6	1488.8	1706.3	1249.3	1433.6	1612.7	1185.79	1482.79	1597.07	1207.42	1479.37		1604.88	0.745601	0.0134886	0.922857	0.556813	TRUE
Q92750-1	Q92750	Transcription initiation factor TFIID subunit 4B [OS=Homo sapiens]	TAF4B	TATA-box binding protein associated factor 4b(TAF4B)	0	31.992	14	8	8	7	1	862	91	9.54	24.54	8	0	391.7	295.1	277.7	425.6	312	271.5	391.7	287.863	276.578	398.354	301.54	280.168		395.027	0.746029	0.0467827	0.704694	0.0551425	TRUE
Q9UG01	Q9UG01	Intraflagellar transport protein 172 homolog [OS=Homo sapiens]	IFT172	intraflagellar transport 172(IFT172)	0	38.352	6	8	11	8	1	1749	197.5	6.13	35.15	8	0	1199.7	862.5	715.2	1233.7	812.1	709.5	1199.7	841.347	712.311	1154.72	784.875	732.151		1177.21	0.69071	0.00488603	0.613511	0.0129238	TRUE
Q9H910-2	Q9H910	Isoform 2 of Jupiter microtubule associated homolog 2 [OS=Homo sapiens]	HN1L	hematological and neurological expressed 1 like(HN1L)	0	128.971	83	13	87	1	1	174	18.4	9.26	287.04	13	0	504.2	367.8	444.6	537.2	406.7	444.4	504.2	358.78	442.804	502.81	393.065	458.588		503.505	0.746612	0.0379044	0.895117	0.439629	TRUE
P15907	P15907	Beta-galactoside alpha-2,6-sialyltransferase 1 [OS=Homo sapiens]	st6gal1	ST6 beta-galactoside alpha-2,6-sialyltransferase 1(ST6GAL1)	0	37.192	20	8	14	8	1	406	46.6	9.01	52.14	8	0	2390.5	1798.6	2313	2508.5	1845.6	2314.2	2390.5	1754.49	2303.66	2347.91	1783.73	2388.08		2369.21	0.746709	0.0139847	0.99015	0.976197	TRUE
Q8WWW0	Q8WWW0	Ras association domain-containing protein 5 [OS=Homo sapiens]	RASSF5	Ras association domain family member 5(RASSF5)	0	17.057	7	3	6	2	1	418	47.1	9.14	17.01	3	1	976	701.2	866.4	962	742.5	836.6	976	684.003	862.9	900.415	717.608	863.309		938.207	0.746962	0.0353425	0.919951	0.559683	TRUE
Q9UK58	Q9UK58	Cyclin-L1 [OS=Homo sapiens]	CCNL1	cyclin L1(CCNL1)	0	29.466	13	5	14	4	1	526	59.6	10.7	45.67	5	0	1002.4	749.9	707.4	1006.8	747.7	696.7	1002.4	731.508	704.542	942.347	722.634	718.943		972.373	0.747728	0.0204192	0.731964	0.0771872	TRUE
Q9BV57	Q9BV57	1,2-dihydroxy-3-keto-5-methylthiopentene dioxygenase [OS=Homo sapiens]	ADI1	acireductone dioxygenase 1(ADI1)	0	50.944	60	9	23	9	1	179	21.5	5.68	74.82	9	0	3431.1	2526.6	3666.1	3512.4	2648.7	3456.9	3431.1	2464.63	3651.29	3287.54	2559.9	3567.26		3359.32	0.74785	0.013855	1.07441	0.700264	FALSE
O43865	O43865	S-adenosylhomocysteine hydrolase-like protein 1 [OS=Homo sapiens]	AHCYL1	adenosylhomocysteinase like 1(AHCYL1)	0	162.266	46	25	106	11	1	530	58.9	6.89	320.11	25	13	10235.4	7697.1	12317.4	10636.1	7863.5	12014.6	10235.4	7508.33	12267.6	9955.2	7599.88	12398.2		10095.3	0.748279	0.00408561	1.22165	0.0912495	FALSE
Q9NXR5	Q9NXR5	Ankyrin repeat domain-containing protein 10 [OS=Homo sapiens]	ANKRD10	ankyrin repeat domain 10(ANKRD10)	0.001	8.123	5	2	2	2	1	420	44.7	5.97	6.69	2	0	509.7	355.6	306.4	528.8	343.3	302.6	509.7	346.879	305.162	494.947	331.791	312.261		502.324	0.67553	0.00813986	0.614567	0.0128505	TRUE
P53794	P53794	sodium/myo-inositol cotransporter [OS=Homo sapiens]	SLC5A3	solute carrier family 5 member 3(SLC5A3)	0	15.541	5	3	6	3	1	718	79.6	7.27	15.81	3	0	384.8	315	244.5	431.7	324.8	234.1	384.8	307.275	243.512	404.063	313.911	241.574		394.432	0.787444	0.0958879	0.614918	0.0134307	TRUE
Q8IUI8	Q8IUI8	Cytokine receptor-like factor 3 [OS=Homo sapiens]	CRLF3	cytokine receptor like factor 3(CRLF3)	0	86.077	31	11	28	11	1	442	49.7	5.14	108.02	11	0	2994.9	2302.5	2974.2	3097.4	2244.5	2725.4	2994.9	2246.03	2962.19	2899.11	2169.25	2812.41		2947.01	0.749114	0.0143256	0.97974	0.827818	TRUE
Q6ZN28	Q6ZN28	Metastasis-associated in colon cancer protein 1 [OS=Homo sapiens]	MACC1	MACC1, MET transcriptional regulator(MACC1)	0	26.798	12	7	9	7	1	852	96.6	6.9	28.95	7	0	748.6	596.8	713.7	888.3	622.4	676.4	748.6	582.163	710.817	831.433	601.534	697.995		790.016	0.74916	0.036937	0.891634	0.454503	TRUE
Q9Y617-1	Q9Y617	phosphoserine aminotransferase [OS=Homo sapiens]	PSAT1	phosphoserine aminotransferase 1(PSAT1)	0	211.093	78	23	142	22	1	370	40.4	7.66	480.06	23	1	19140.6	17826.5	11641.6	19086.5	18338.7	10815.4	19140.6	17389.3	11594.6	17864.6	17723.9	11160.7		18502.6	0.948872	0.583423	0.61492	0.00134347	TRUE
Q9HA77	Q9HA77	probable cysteine--tRNA ligase, mitochondrial [OS=Homo sapiens]	CARS2	cysteinyl-tRNA synthetase 2, mitochondrial (putative)(CARS2)	0	31.392	14	7	18	7	1	564	62.2	8.34	42.96	7	0	1569.1	1203.6	1250.1	1633.5	1188.3	1233.2	1569.1	1174.08	1245.05	1528.93	1148.46	1272.57		1549.01	0.749685	0.0150351	0.812653	0.173601	TRUE
Q6ZPD9-1	Q6ZPD9	probable C-mannosyltransferase DPY19L3 [OS=Homo sapiens]	DPY19L3	dpy-19 like 3 (C. elegans)(DPY19L3)	0.001	9.121	3	3	4	3	1	716	83.1	8.72	9.88	3	0	171.7	145.6	148.1	232.1	154.8	153.3	171.7	142.029	147.502	217.241	149.61	158.194		194.471	0.749829	0.0146254	0.785969	0.13328	TRUE
Q9NUP7-1	Q9NUP7	tRNA:m(4)X modification enzyme TRM13 homolog [OS=Homo sapiens]	TRMT13	tRNA methyltransferase 13 homolog(TRMT13)	0	49.807	21	8	18	8	1	481	54.2	8.09	64.91	8	0	3126.7	2443.2	2380.5	3364.8	2407	2383.5	3126.7	2383.28	2370.88	3149.39	2326.31	2459.6		3138.05	0.750401	0.0148193	0.769663	0.0772228	TRUE
Q969T4	Q969T4	Ubiquitin-conjugating enzyme E2 E3 [OS=Homo sapiens]	UBE2E3	ubiquitin conjugating enzyme E2 E3(UBE2E3)	0	47.889	43	7	27	4	1	207	22.9	7.18	91.75	7	3	2591.5	1971.3	1968.4	2671.6	1964.7	1934	2591.5	1922.95	1960.45	2500.57	1898.83	1995.74		2546.03	0.750537	0.0154814	0.776932	0.14853	TRUE
P49675	P49675	Steroidogenic acute regulatory protein, mitochondrial [OS=Homo sapiens]	STAR	steroidogenic acute regulatory protein(STAR)	0	50.338	49	9	12	9	1	285	31.9	9.03	48.96	9	0	852.8	604.3	792.7	823.2	650.9	798.8	852.8	589.479	789.498	770.5	629.079	824.302		811.65	0.750667	0.0380653	0.994148	0.879209	TRUE
Q5H9R7-5	Q5H9R7	Isoform 5 of Serine/threonine-protein phosphatase 6 regulatory subunit 3 [OS=Homo sapiens]	PPP6R3	protein phosphatase 6 regulatory subunit 3(PPP6R3)	0	326.852	49	37	145	37	1	879	98.4	4.64	549.87	37	0	17818.6	20027.2	10764.3	18738	20343.3	10690.7	17818.6	19536	10720.8	17538.4	19661.3	11032		17678.5	1.10861	0.220681	0.615233	0.00135717	FALSE
Q8IWE4	Q8IWE4	DCN1-like protein 3 [OS=Homo sapiens]	DCUN1D3	defective in cullin neddylation 1 domain containing 3(DCUN1D3)	0.001	7.836	9	2	2	2	1	304	34.3	5.12	10.02	2	0	279.4	274.1	164.2	284.6	259	167.4	279.4	267.378	163.537	266.38	250.317	172.744		272.89	0.94854	0.622054	0.616147	0.0120304	TRUE
Q8N8N7-1	Q8N8N7	Prostaglandin reductase 2 [OS=Homo sapiens]	PTGR2	prostaglandin reductase 2(PTGR2)	0	41.433	26	7	39	7	1	351	38.5	5.41	120.95	7	0	1638	1305.6	1503.7	1862	1311.3	1598.5	1638	1273.58	1497.63	1742.8	1267.34	1649.53		1690.4	0.751574	0.0268236	0.930892	0.607314	TRUE
Q6PJ61	Q6PJ61	F-box only protein 46 [OS=Homo sapiens]	FBXO46	F-box protein 46(FBXO46)	0	16.276	10	3	4	3	1	603	64.6	7.4	14.32	3	0	234	158.9	195.7	205.7	171.4	161.2	234	155.003	194.909	192.531	165.654	166.346		213.266	0.751778	0.0154177	0.846962	0.254886	TRUE
Q8TAA5	Q8TAA5	GrpE protein homolog 2, mitochondrial [OS=Homo sapiens]	grpel2	GrpE like 2, mitochondrial(GRPEL2)	0	13.094	20	2	4	2	1	225	25.4	7.72	11.49	2	0	428.1	356.2	332.4	498.8	336.7	361.2	428.1	347.464	331.057	466.868	325.412	372.732		447.484	0.751844	0.0520297	0.786385	0.15757	TRUE
Q8WTX7	Q8WTX7	Cytosolic arginine sensor for mTORC1 subunit 1 [OS=Homo sapiens]	GATSL3	GATS protein like 3(GATSL3)	0.001	10.775	9	2	3	2	1	329	36.3	5.19	8.43	2	0	17	16.5	17.1	21.6	12.3	19.6	17	16.0953	17.0309	20.2172	11.8876	20.2257		18.6086	0.751883	0.0320072	1.00106	0.782121	FALSE
Q5T9S5-1	Q5T9S5	Coiled-coil domain-containing protein 18 [OS=Homo sapiens]	CCDC18	coiled-coil domain containing 18(CCDC18)	0	32.603	8	8	13	8	1	1454	168.9	5.66	29.34	8	0	1378.1	1060.2	1046.4	1450.8	1058.6	1054.7	1378.1	1034.2	1042.17	1357.92	1023.11	1088.37		1368.01	0.751934	0.0159519	0.778702	0.10984	TRUE
Q96JJ3	Q96JJ3	Engulfment and cell motility protein 2 [OS=Homo sapiens]	elmo2	engulfment and cell motility 2(ELMO2)	0	38.084	18	10	12	8	1	720	82.6	5.9	40	10	2	1395.1	1060.8	1237.7	1445	1067.1	1230.7	1395.1	1034.78	1232.7	1352.49	1031.33	1269.99		1373.8	0.75197	0.0159671	0.910866	0.501774	TRUE
Q8TDY4-1	Q8TDY4	Arf-GAP with SH3 domain, ANK repeat and PH domain-containing protein 3 [OS=Homo sapiens]	ASAP3	ArfGAP with SH3 domain, ankyrin repeat and PH domain 3(ASAP3)	0	38.653	13	7	10	7	1	903	99.1	6.4	43.24	7	0	622	504.4	599	669.1	462.4	582.8	622	492.029	596.58	626.266	446.898	601.406		624.133	0.752186	0.0422385	0.959721	0.705517	TRUE
Q96JN2-4	Q96JN2	Isoform 4 of Coiled-coil domain-containing protein 136 [OS=Homo sapiens]	CCDC136	coiled-coil domain containing 136(CCDC136)	0.002	6.799	2	2	3	2	1	1157	134.6	4.67	5.29	2	0	119.4	89.4	85.8	133.7	100.2	98.5	119.4	87.2074	85.4534	125.141	96.8408	101.645		122.27	0.752628	0.0626209	0.7651	0.108202	TRUE
P36955	P36955	Pigment epithelium-derived factor [OS=Homo sapiens]	SERPINF1	serpin family F member 1(SERPINF1)	0	22.452	12	5	13	2	1	418	46.3	6.38	34.76	5	2	1506.7	1194.8	1353.9	1664.4	1180.8	1280.4	1506.7	1165.5	1348.43	1557.85	1141.21	1321.28		1532.27	0.752708	0.0162786	0.871159	0.341974	TRUE
P53801	P53801	pituitary tumor-transforming gene 1 protein-interacting protein [OS=Homo sapiens]	PTTG1IP	pituitary tumor-transforming 1 interacting protein(PTTG1IP)	0	22.914	17	2	9	2	1	180	20.3	8.79	32.67	2	0	1285.3	971.3	1512.4	1329.7	990.3	1414.3	1285.3	947.479	1506.29	1244.58	957.1	1459.45		1264.94	0.752835	0.0229576	1.17229	0.386478	FALSE
Q70CQ2	Q70CQ2	Ubiquitin carboxyl-terminal hydrolase 34 [OS=Homo sapiens]	USP34	ubiquitin specific peptidase 34(USP34)	0	192.806	16	44	62	44	1	3546	404	5.82	205.16	44	0	7757	6382.3	4751.3	8400.1	6357	4755.2	7757	6225.77	4732.11	7862.34	6143.88	4907.01		7809.67	0.791945	0.0406481	0.617127	0.00540651	TRUE
Q7Z5H3-2	Q7Z5H3	Isoform 2 of Rho GTPase-activating protein 22 [OS=Homo sapiens]	ARHGAP22	Rho GTPase activating protein 22(ARHGAP22)	0.005	5.453	2	1	1	1	1	714	78.4	8.28	4.79	1	0	101.9	71.5	69.1	94.2	75.9	66.9	101.9	69.7464	68.8209	88.1695	73.3555	69.0358		95.0348	0.752893	0.0628782	0.725296	0.0654918	TRUE
Q8TB03	Q8TB03	Uncharacterized protein CXorf38 [OS=Homo sapiens]	cxorf38	chromosome X open reading frame 38(CXorf38)	0	44.979	38	10	27	10	1	319	36.6	6.3	59.41	10	0	3286.2	2464.2	2662.4	3358.7	2523.4	2669.5	3286.2	2403.76	2651.64	3143.68	2438.8	2754.73		3214.94	0.753135	0.015918	0.84082	0.214169	TRUE
Q5BKX6-3	Q5BKX6	Isoform 3 of Solute carrier family 45 member 4 [OS=Homo sapiens]	SLC45A4	solute carrier family 45 member 4(SLC45A4)	0	17.922	6	4	6	4	1	798	87.6	6.99	15.66	4	0	678.7	536.7	496.4	697.5	496.2	470.5	678.7	523.537	494.395	652.847	479.565	485.521		665.774	0.753336	0.043183	0.735923	0.0808087	TRUE
P17707-1	P17707	S-adenosylmethionine decarboxylase proenzyme [OS=Homo sapiens]	AMD1	adenosylmethionine decarboxylase 1(AMD1)	0	24.676	16	5	11	5	1	334	38.3	6	33.04	5	0	1720.7	1462.8	1041.1	1815.1	1501.5	1040.9	1720.7	1426.92	1036.89	1698.9	1451.16	1074.13		1709.8	0.841644	0.152547	0.617331	0.00929757	TRUE
P24588	P24588	A-kinase anchor protein 5 [OS=Homo sapiens]	AKAP5	A-kinase anchoring protein 5(AKAP5)	0.001	9.52	8	2	2	2	1	427	47.1	4.93	7.69	2	0	52.3	36	52	61.6	49.4	42.5	52.3	35.1171	51.7899	57.6565	47.7439	43.8568		54.9782	0.75358	0.0331614	0.86986	0.292133	TRUE
Q969F8	Q969F8	KiSS-1 receptor [OS=Homo sapiens]	KISS1R	KISS1 receptor(KISS1R)	0.001	10.491	10	3	4	3	1	398	42.6	9.85	12.95	3	0	868.1	662.2	549.9	989.8	649.9	544.5	868.1	645.959	547.679	926.435	628.112	561.884		897.267	0.709973	0.0161046	0.618301	0.019442	TRUE
P02649	P02649	Apolipoprotein E [OS=Homo sapiens]	APOE	apolipoprotein E(APOE)	0	87.248	56	14	42	11	1	317	36.1	5.73	122.99	14	4	3958.8	3203.8	4689.5	4413.2	3076	4958	3958.8	3125.23	4670.56	4130.68	2972.88	5116.29		4044.74	0.753832	0.00661044	1.20982	0.264689	FALSE
P62312	P62312	U6 snRNA-associated Sm-like protein LSm6 [OS=Homo sapiens]	LSM6	LSM6 homolog, U6 small nuclear RNA and mRNA degradation associated(LSM6)	0	31.552	91	7	19	7	1	80	9.1	9.58	58.74	7	0	3505.7	3661.2	2194.1	3818.6	3727.1	2140.8	3505.7	3571.41	2185.24	3574.14	3602.15	2209.15		3539.92	1.01324	0.966141	0.62069	0.011874	FALSE
O14787-2	O14787	Isoform 2 of Transportin-2 [OS=Homo sapiens]	TNPO2	transportin 2(TNPO2)	0	193.88	34	23	111	16	1	887	100.3	4.98	364.72	23	0	6421.9	4863.6	4965.4	6628.8	4943.6	4937.4	6421.9	4744.32	4945.34	6204.44	4777.87	5095.03		6313.17	0.754153	0.0108576	0.795193	0.122859	TRUE
Q8NCD3-1	Q8NCD3	Holliday junction recognition protein [OS=Homo sapiens]	HJURP	Holliday junction recognition protein(HJURP)	0	60.163	23	13	23	13	1	748	83.5	9.31	71.37	13	0	2631.4	2032.5	1604.6	2836.6	2017.1	1635.5	2631.4	1982.65	1598.12	2655.01	1949.48	1687.71		2643.2	0.743819	0.0129407	0.621563	0.0132948	TRUE
Q96QD8	Q96QD8	sodium-coupled neutral amino acid transporter 2 [OS=Homo sapiens]	SLC38A2	solute carrier family 38 member 2(SLC38A2)	0	25.052	9	3	8	3	1	506	56	8	39.53	3	0	1041.4	780.4	811.8	1059.6	800.6	768.4	1041.4	761.26	808.521	991.766	773.76	792.932		1016.58	0.75499	0.0241084	0.787664	0.152908	TRUE
Q96PM9	Q96PM9	Zinc finger protein 385A [OS=Homo sapiens]	ZNF385A	zinc finger protein 385A(ZNF385A)	0	58.286	39	12	35	12	1	386	40.4	9.86	115.36	12	0	3316.4	2633	2697.6	3719.1	2652.7	2686.6	3316.4	2568.42	2686.7	3481.01	2563.77	2772.37		3398.71	0.755022	0.00686774	0.803111	0.182066	TRUE
Q8TBY9-2	Q8TBY9	Isoform 2 of Cilia- and flagella-associated protein 251 [OS=Homo sapiens]	WDR66	WD repeat domain 66(WDR66)	0	13.251	5	5	6	5	1	941	106.2	5.29	15.47	5	0	248.6	178.9	269.1	247.7	194.8	242.2	248.6	174.512	268.013	231.843	188.269	249.932		240.221	0.755099	0.0168555	1.07806	0.839136	FALSE
Q86YQ8	Q86YQ8	Copine-8 [OS=Homo sapiens]	CPNE8	copine 8(CPNE8)	0.001	8.441	5	3	7	2	1	564	63.1	5.96	15.29	3	0	66.4	55.8	41.1	77.1	59.2	43.8	66.4	54.4315	40.934	72.1642	57.2153	45.1984		69.2821	0.805741	0.0903245	0.621606	0.0116197	TRUE
Q9BUT1-1	Q9BUT1	3-hydroxybutyrate dehydrogenase type 2 [OS=Homo sapiens]	BDH2	3-hydroxybutyrate dehydrogenase, type 2(BDH2)	0	20.417	21	4	7	4	1	245	26.7	7.65	12.46	4	0	923.4	643.2	713.9	795	654.7	769.1	923.4	627.425	711.016	744.106	632.751	793.654		833.753	0.755726	0.0420694	0.902348	0.492937	TRUE
Q12840	Q12840	Kinesin heavy chain isoform 5A [OS=Homo sapiens]	KIF5A	kinesin family member 5A(KIF5A)	0	249.416	48	37	87	29	1	1032	117.3	5.9	319.31	37	0	8300.4	6472.6	10091.3	8794.7	6406.5	9421.4	8300.4	6313.86	10050.5	8231.68	6191.72	9722.19		8266.04	0.756443	0.0157832	1.19602	0.164281	FALSE
Q9NXS2	Q9NXS2	Glutaminyl-peptide cyclotransferase-like protein [OS=Homo sapiens]	QPCTL	glutaminyl-peptide cyclotransferase like(QPCTL)	0.001	9.898	10	4	4	4	1	382	42.9	9.82	9.64	4	0	353.8	274.6	315.2	398.6	291.8	315	353.8	267.865	313.927	373.082	282.017	325.057		363.441	0.756495	0.0565723	0.879074	0.400398	TRUE
P43121	P43121	Cell surface glycoprotein MUC18 [OS=Homo sapiens]	MCAM	melanoma cell adhesion molecule(MCAM)	0	96.414	27	14	46	14	1	646	71.6	5.76	181.37	14	0	7196.8	5331.9	5600.8	7222	5545.5	5755.8	7196.8	5201.13	5578.17	6759.66	5359.59	5939.56		6978.23	0.75669	0.0158942	0.825262	0.232351	TRUE
O94864-1	O94864	STAGA complex 65 subunit gamma [OS=Homo sapiens]	SUPT7L	SPT7-like STAGA complex gamma subunit(SUPT7L)	0	31.374	20	5	11	5	1	414	46.2	5.12	37.87	5	0	1988.4	1500.2	2021.4	2012.2	1517.4	1980	1988.4	1463.41	2013.23	1883.38	1466.53	2043.21		1935.89	0.756741	0.030073	1.04769	0.817799	FALSE
Q9Y5K8	Q9Y5K8	V-type proton ATPase subunit D [OS=Homo sapiens]	ATP6V1D	ATPase H+ transporting V1 subunit D(ATP6V1D)	0	102.207	57	16	55	16	1	247	28.2	9.36	191.77	16	0	5136	4045.5	4605.7	5520.2	3987.6	4210.9	5136	3946.28	4587.09	5166.81	3853.92	4345.34		5151.4	0.757095	0.0253087	0.86699	0.335634	TRUE
P42768	P42768	Wiskott-Aldrich syndrome protein [OS=Homo sapiens]	WAS	Wiskott-Aldrich syndrome(WAS)	0	22.243	15	6	6	6	1	502	52.9	6.64	18.99	6	0	591.5	473.5	534.2	706	504	506.2	591.5	461.887	532.042	660.803	487.104	522.361		626.152	0.757796	0.0470171	0.841971	0.272328	TRUE
O43598-1	O43598	2'-deoxynucleoside 5'-phosphate N-hydrolase 1 [OS=Homo sapiens]	DNPH1	2'-deoxynucleoside 5'-phosphate N-hydrolase 1(DNPH1)	0	74.957	68	7	59	7	1	174	19.1	5.05	197.65	7	0	4414	3441.7	3266	4769.5	3490.8	3297.3	4414	3357.29	3252.81	4464.17	3373.77	3402.57		4439.08	0.758159	0.0259496	0.749634	0.052701	TRUE
P30414	P30414	NK-tumor recognition protein [OS=Homo sapiens]	NKTR	natural killer cell triggering receptor(NKTR)	0	121.183	18	20	39	20	1	1462	165.6	9.99	144.63	20	0	6844.3	5369.5	5050.3	7188.9	5240.6	5079.7	6844.3	5237.81	5029.9	6728.68	5064.91	5241.87		6786.49	0.759061	0.0126181	0.756781	0.0625398	TRUE
Q96PU4-1	Q96PU4	E3 ubiquitin-protein ligase UHRF2 [OS=Homo sapiens]	UHRF2	ubiquitin like with PHD and ring finger domains 2(UHRF2)	0	47.719	18	10	18	9	1	802	89.9	8.21	56.13	10	0	765.6	613.6	602.4	811.3	578.7	567.4	765.6	598.551	599.966	759.362	559.299	585.515		762.481	0.759265	0.0450783	0.777384	0.157915	TRUE
O94903	O94903	Pyridoxal phosphate homeostasis protein [OS=Homo sapiens]	PROSC	proline synthetase cotranscribed homolog (bacterial)(PROSC)	0	71.985	48	12	46	12	1	275	30.3	7.5	148.96	12	0	3894.1	3022	4266.4	4157	3066.4	4031.6	3894.1	2947.88	4249.16	3890.88	2963.6	4160.31		3892.49	0.759345	0.00787983	1.08022	0.692842	FALSE
Q6ZWJ1-1	Q6ZWJ1	Syntaxin-binding protein 4 [OS=Homo sapiens]	STXBP4	syntaxin binding protein 4(STXBP4)	0	98.456	39	19	50	19	1	553	61.6	5.2	140.91	19	0	4469.5	3402.8	3889.3	4648.4	3495.6	3678.2	4469.5	3319.35	3873.59	4350.82	3378.41	3795.63		4410.16	0.759355	0.0266864	0.869494	0.346177	TRUE
Q96RU3-1	Q96RU3	Formin-binding protein 1 [OS=Homo sapiens]	FNBP1	formin binding protein 1(FNBP1)	0	22.244	8	4	7	4	1	617	71.3	5.72	20.52	4	0	973.4	811.3	895.7	1071	734.3	972.6	973.4	791.403	892.082	1002.44	709.683	1003.65		987.918	0.759721	0.0268117	0.959458	0.698668	TRUE
Q5T890-1	Q5T890	DNA excision repair protein ERCC-6-like 2 [OS=Homo sapiens]	ERCC6L2	ERCC excision repair 6 like 2(ERCC6L2)	0.001	8.548	2	2	2	2	1	1561	177	8.6	5.89	2	0	87.9	64.4	58.7	88.3	69.1	62.6	87.9	62.8206	58.4629	82.6472	66.7834	64.5986		85.2736	0.75993	0.0700523	0.721568	0.0623288	TRUE
Q7Z3V4-1	Q7Z3V4	Ubiquitin-protein ligase E3B [OS=Homo sapiens]	UBE3B	ubiquitin protein ligase E3B(UBE3B)	0	30.088	9	9	19	9	1	1068	123	8.19	41.37	9	0	804	601.5	769.1	791.5	607.7	737.7	804	586.748	765.993	740.83	587.327	761.252		772.415	0.760003	0.0457278	0.988617	0.853916	TRUE
Q6NT76-5	Q6NT76	Isoform 5 of Homeobox-containing protein 1 [OS=Homo sapiens]	HMBOX1	homeobox containing 1(HMBOX1)	0	40.344	18	8	18	8	1	443	49.8	5.76	54.94	8	0	2130.5	1599.3	1747.9	2216.2	1696.1	1800.4	2130.5	1560.08	1740.84	2074.32	1639.24	1857.88		2102.41	0.760868	0.032906	0.855855	0.310895	TRUE
P42694-2	P42694	Isoform 2 of Probable helicase with zinc finger domain [OS=Homo sapiens]	HELZ	helicase with zinc finger(HELZ)	0	158.047	29	29	53	1	1	1163	133	7.47	186.55	29	0	16.4	14.5	18.4	23.5	15.6	15.9	16.4	14.1444	18.3257	21.9956	15.077	16.4076		19.1978	0.761062	0.0386851	0.904617	0.396637	TRUE
Q9BTE7	Q9BTE7	DCN1-like protein 5 [OS=Homo sapiens]	DCUN1D5	defective in cullin neddylation 1 domain containing 5(DCUN1D5)	0	90.752	61	12	49	11	1	237	27.5	5.58	148.73	12	1	4087.3	3059.7	3003.5	4216.2	3240.3	2814.9	4087.3	2984.66	2991.37	3946.29	3131.67	2904.77		4016.79	0.761345	0.00839164	0.733936	0.0746785	TRUE
Q8N1A6	Q8N1A6	UPF0462 protein C4orf33 [OS=Homo sapiens]	C4orf33	chromosome 4 open reading frame 33(C4orf33)	0	25.521	36	4	8	4	1	199	23.5	5.43	36.12	4	0	1588.8	1235.4	1288	1772.4	1314.1	1223.2	1588.8	1205.1	1282.8	1658.93	1270.05	1262.25		1623.87	0.762115	0.0207436	0.783638	0.117752	TRUE
Q96MN5	Q96MN5	transcription elongation factor A N-terminal and central domain-containing protein 2 [OS=Homo sapiens]	TCEANC2	transcription elongation factor A N-terminal and central domain containing 2(TCEANC2)	0.001	9.971	17	4	5	4	1	208	24.1	10.05	11.13	4	0	346.5	293.2	264.8	404.5	276	242.5	346.5	286.009	263.73	378.605	266.747	250.242		362.552	0.762312	0.0627146	0.708825	0.058459	TRUE
O75638	O75638	Cancer/testis antigen 2 [OS=Homo sapiens]	CTAG2	cancer/testis antigen 2(CTAG2)	0.001	10.926	18	2	4	2	1	210	21	9.96	8.92	2	0	135.6	111.5	110.6	141.9	99.2	106.2	135.6	108.765	110.153	132.816	95.8743	109.591		134.208	0.762398	0.0727218	0.818669	0.197292	TRUE
P48736	P48736	Phosphatidylinositol 4,5-bisphosphate 3-kinase catalytic subunit gamma isoform [OS=Homo sapiens]	PIK3CG	phosphatidylinositol-4,5-bisphosphate 3-kinase catalytic subunit gamma(PIK3CG)	0	78.098	19	19	29	19	1	1102	126.4	7.5	98.35	19	0	3302	2551.1	4110.8	3354.1	2507.2	3921.1	3302	2488.53	4094.19	3139.38	2423.15	4046.28		3220.69	0.76252	0.0202535	1.26378	0.132725	FALSE
Q96CM8-2	Q96CM8	Isoform 2 of Acyl-CoA synthetase family member 2, mitochondrial [OS=Homo sapiens]	ACSF2	acyl-CoA synthetase family member 2(ACSF2)	0	34.251	18	9	9	9	1	640	70.6	7.84	31.66	9	0	628.8	516.6	540.2	727.7	512.1	616.3	628.8	503.93	538.018	681.114	494.932	635.976		654.957	0.76254	0.051405	0.896237	0.443691	TRUE
Q86SQ7	Q86SQ7	Serologically defined colon cancer antigen 8 [OS=Homo sapiens]	SDCCAG8	serologically defined colon cancer antigen 8(SDCCAG8)	0	38.753	15	7	12	7	1	713	82.6	5.81	52.32	7	0	784.9	611.5	559.4	854.3	633	586.6	784.9	596.503	557.14	799.609	611.779	605.328		792.255	0.762559	0.0480394	0.733645	0.0956352	TRUE
Q16643	Q16643	drebrin [OS=Homo sapiens]	DBN1	drebrin 1(DBN1)	0	189.911	54	23	69	23	1	649	71.4	4.45	304.92	23	0	8887.4	8080.6	5356.2	9452.1	8235.7	5581.9	8887.4	7882.42	5334.56	8847	7959.6	5760.11		8867.2	0.893294	0.317311	0.625602	0.0065852	TRUE
O95721	O95721	Synaptosomal-associated protein 29 [OS=Homo sapiens]	SNAP29	synaptosome associated protein 29(SNAP29)	0	180.168	73	18	101	18	1	258	29	5.81	354.4	18	0	12774.5	15279.8	8179.9	13731.4	15363.5	7653.7	12774.5	14905.1	8146.86	12852.3	14848.4	7898.05		12813.4	1.16103	0.0735454	0.626098	0.00192064	FALSE
Q6PI26	Q6PI26	Protein SHQ1 homolog [OS=Homo sapiens]	SHQ1	SHQ1, H/ACA ribonucleoprotein assembly factor(SHQ1)	0	31.004	17	7	9	7	1	577	65.1	4.79	24.67	7	0	759.1	557	500.8	717.3	568.5	465.1	759.1	543.339	498.777	671.38	549.441	479.949		715.24	0.763926	0.0493155	0.684194	0.0507157	TRUE
Q86U90	Q86U90	YrdC domain-containing protein, mitochondrial [OS=Homo sapiens]	YRDC	yrdC N6-threonylcarbamoyltransferase domain containing(YRDC)	0	62.374	52	10	35	10	1	279	29.3	8.57	106.04	10	0	3832.5	3516.8	2377.8	4042.5	3565.4	2339.5	3832.5	3430.55	2368.19	3783.71	3445.87	2414.19		3808.1	0.902867	0.258645	0.627922	0.0135481	TRUE
Q9NV64-1	Q9NV64	Transmembrane protein 39A [OS=Homo sapiens]	TMEM39A	transmembrane protein 39A(TMEM39A)	0.004	6.086	6	2	3	2	1	488	55.6	8.75	6.55	2	0	138.3	122.9	204.3	190.5	126.4	212.2	138.3	119.886	203.475	178.305	122.162	218.975		158.302	0.764513	0.0750751	1.33431	0.212771	FALSE
Q8WUU4	Q8WUU4	Zinc finger protein 296 [OS=Homo sapiens]	ZNF296	zinc finger protein 296(ZNF296)	0.006	5.177	5	1	1	1	1	475	50.8	8.82	4.1	1	0	39.3	27.9	21.7	29.6	20.2	19.9	39.3	27.2157	21.6123	27.7051	19.5228	20.5353		33.5025	0.697537	0.00934875	0.629022	0.013154	TRUE
O43399-3	O43399	Isoform 3 of Tumor protein D54 [OS=Homo sapiens]	TPD52L2	tumor protein D52 like 2(TPD52L2)	0	131.275	71	16	73	1	1	209	22.5	6.7	281.58	16	0	166.5	104.1	100.3	130.6	115.7	79.3	166.5	101.547	99.8948	122.239	111.821	81.8317		144.37	0.738965	0.050466	0.629379	0.0159734	TRUE
Q96L15	Q96L15	Ecto-ADP-ribosyltransferase 5 [OS=Homo sapiens]	ART5	ADP-ribosyltransferase 5(ART5)	0.004	6.031	6	2	5	1	1	291	32	8.27	8.9	2	0	58.3	40.9	42	58.7	48.4	41.9	58.3	39.8969	41.8303	54.9421	46.7774	43.2377		56.6211	0.765389	0.0422234	0.751205	0.0790763	TRUE
Q9NVC3-1	Q9NVC3	Putative sodium-coupled neutral amino acid transporter 7 [OS=Homo sapiens]	SLC38A7	solute carrier family 38 member 7(SLC38A7)	0.001	11.084	5	2	7	2	1	462	49.9	5.08	15.31	2	0	394.1	314.8	369.9	470.5	343.6	449.3	394.1	307.079	368.406	440.38	332.081	463.644		417.24	0.765939	0.0668152	0.997089	0.910711	TRUE
Q6FI81-1	Q6FI81	Anamorsin [OS=Homo sapiens]	CIAPIN1	cytokine induced apoptosis inhibitor 1(CIAPIN1)	0	182.556	85	22	98	22	1	312	33.6	5.62	349.58	22	0	17304.9	13550.6	17287.4	18505.6	13767.8	16603.7	17304.9	13218.3	17217.6	17320.9	13306.2	17133.8		17312.9	0.766033	0.00643412	0.992074	0.809063	TRUE
Q8N5H7-1	Q8N5H7	SH2 domain-containing protein 3C [OS=Homo sapiens]	SH2D3C	SH2 domain containing 3C(SH2D3C)	0.005	5.544	2	1	1	1	1	860	94.4	8.07	5.44	1	0	18.6	16.4	16.7	20.2	13.2	13.1	18.6	15.9978	16.6325	18.9068	12.7575	13.5182		18.7534	0.766667	0.0433192	0.803874	0.148685	TRUE
Q9Y520-4	Q9Y520	Isoform 4 of Protein PRRC2C [OS=Homo sapiens]	PRRC2C	proline rich coiled-coil 2C(PRRC2C)	0	619.959	39	92	374	1	1	2817	308.4	9.07	1181.84	92	0	178.8	148.5	132.3	197.8	138.9	125.5	178.8	144.858	131.766	185.137	134.243	129.507		181.969	0.766894	0.0229553	0.717905	0.0566394	TRUE
Q9BUP0	Q9BUP0	EF-hand domain-containing protein D1 [OS=Homo sapiens]	EFHD1	EF-hand domain family member D1(EFHD1)	0.001	7.919	10	3	4	2	1	239	26.9	5.39	11.81	3	0	256.7	204.8	171.5	385.3	146.7	211.1	256.7	199.777	170.807	360.634	141.782	217.84		308.667	0.553281	0.000479146	0.629557	0.017231	TRUE
Q53HL2	Q53HL2	Borealin [OS=Homo sapiens]	CDCA8	cell division cycle associated 8(CDCA8)	0	110.278	57	16	43	16	1	280	31.3	9.86	150.72	16	0	5235	4634.9	3300.2	5606.8	4785.6	3216.1	5235	4521.23	3286.87	5247.86	4625.16	3318.78		5241.43	0.872509	0.235687	0.630137	0.00339319	TRUE
P04080	P04080	Cystatin-B [OS=Homo sapiens]	CSTB	cystatin B(CSTB)	0	45.658	70	4	24	4	1	98	11.1	7.56	92.85	4	0	2897.3	2306.6	3396.8	3289.7	2420.6	3563.1	2897.3	2250.03	3383.08	3079.1	2339.45	3676.86	Acetyl [N-Term]	2988.2	0.767934	0.0231965	1.1813	0.30948	FALSE
Q96HU1-2	Q96HU1	Isoform 2 of Small G protein signaling modulator 3 [OS=Homo sapiens]	SGSM3	small G protein signaling modulator 3(SGSM3)	0.001	8.093	4	2	3	2	1	777	88.3	6.06	9.6	2	0	273.3	224.2	249.7	325.9	233.3	252.3	273.3	218.701	248.691	305.037	225.479	260.355		289.168	0.768031	0.0236334	0.88019	0.346732	TRUE
Q9Y5Q0	Q9Y5Q0	fatty acid desaturase 3 [OS=Homo sapiens]	FADS3	fatty acid desaturase 3(FADS3)	0	13.09	8	3	4	3	1	445	51.1	7.77	12.04	3	0	308.6	265.9	288.9	385.1	263.3	302.2	308.6	259.379	287.733	360.447	254.473	311.848		334.523	0.768036	0.0692852	0.896172	0.462141	TRUE
Q9BQF6	Q9BQF6	Sentrin-specific protease 7 [OS=Homo sapiens]	SENP7	SUMO1/sentrin specific peptidase 7(SENP7)	0	38.565	13	9	12	9	1	1050	119.6	6.61	37.61	9	0	1529.4	1155.8	1203.3	1567.1	1214.6	1146.8	1529.4	1127.45	1198.44	1466.78	1173.88	1183.41		1498.09	0.76809	0.0241049	0.794963	0.13759	TRUE
P46100	P46100	transcriptional regulator ATRX [OS=Homo sapiens]	ATRX	ATRX, chromatin remodeler(ATRX)	0	92.55	13	21	25	21	1	2492	282.4	6.58	89.75	21	0	2858.4	2076.7	2245.6	2733.1	2209.2	2118.1	2858.4	2025.77	2236.53	2558.13	2135.14	2185.72		2708.27	0.768186	0.0243525	0.816436	0.236967	TRUE
O00142-6	O00142	Isoform 6 of Thymidine kinase 2, mitochondrial [OS=Homo sapiens]	TK2	thymidine kinase 2, mitochondrial(TK2)	0.001	8.554	7	2	2	2	1	307	35.4	9.5	7.69	2	0	362.4	274.3	341.3	378	292.6	345.5	362.4	267.573	339.921	353.801	282.791	356.53		358.101	0.768448	0.0697797	0.972425	0.791435	TRUE
O00499	O00499	Myc box-dependent-interacting protein 1 [OS=Homo sapiens]	BIN1	bridging integrator 1(BIN1)	0.004	6.046	3	1	1	1	1	593	64.7	5.06	6.12	1	0	86.8	61	87.8	86.3	71.7	87.9	86.8	59.504	87.4453	80.7752	69.2963	90.7063		83.7876	0.768611	0.0798126	1.06311	0.911433	FALSE
Q13118	Q13118	Krueppel-like factor 10 [OS=Homo sapiens]	KLF10	Kruppel like factor 10(KLF10)	0.008	4.346	3	1	1	1	1	480	52.5	9.1	2.61	1	0	45.9	48.8	30.2	46.2	40	25.4	45.9	47.6032	30.078	43.2424	38.659	26.2109		44.5712	0.96769	0.734874	0.63145	0.0136937	TRUE
O14907	O14907	Tax1-binding protein 3 [OS=Homo sapiens]	TAX1BP3	Tax1 binding protein 3(TAX1BP3)	0	14.193	28	2	3	2	1	124	13.7	8.48	11.81	2	0	103.8	74	57.8	100.1	82.1	65.1	103.8	72.1851	57.5665	93.6918	79.3476	67.1784		98.7459	0.767286	0.078255	0.631646	0.0165701	TRUE
Q9UJY4	Q9UJY4	ADP-ribosylation factor-binding protein GGA2 [OS=Homo sapiens]	GGA2	golgi associated, gamma adaptin ear containing, ARF binding protein 2(GGA2)	0	65.702	23	11	23	11	1	613	67.1	6.55	73.59	11	0	1741.4	1373.7	1495.8	1791.3	1333.5	1582.2	1741.4	1340.01	1489.76	1676.62	1288.79	1632.71		1709.01	0.7691	0.0392442	0.913531	0.529044	TRUE
Q86UY8	Q86UY8	5'-nucleotidase domain-containing protein 3 [OS=Homo sapiens]	NT5DC3	5'-nucleotidase domain containing 3(NT5DC3)	0	14.435	7	4	8	4	1	548	63.4	8.31	18.52	4	0	771	769.1	479.3	755	781.8	445.4	771	750.238	477.364	706.666	755.59	459.62		738.833	1.01906	0.904254	0.634097	0.0247607	FALSE
P55822-1	P55822	SH3 domain-binding glutamic acid-rich protein [OS=Homo sapiens]	SH3BGR	SH3 domain binding glutamate rich protein(SH3BGR)	0	19.842	20	5	5	5	1	239	26.1	4.15	14.87	5	0	474.4	345.1	285.5	497.7	353.7	302.3	474.4	336.636	284.347	465.838	341.842	311.951		470.119	0.721603	0.0293435	0.634199	0.0186188	TRUE
Q9UPT9-1	Q9UPT9	ubiquitin carboxyl-terminal hydrolase 22 [OS=Homo sapiens]	USP22	ubiquitin specific peptidase 22(USP22)	0	50.949	25	11	22	8	1	525	59.9	8.05	67.69	11	2	2298.5	1798.6	1874.5	2386.3	1796.2	1816.3	2298.5	1754.49	1866.93	2233.53	1735.98	1874.29		2266.02	0.770178	0.0255881	0.825505	0.261683	TRUE
Q92686	Q92686	Neurogranin [OS=Homo sapiens]	NRGN	neurogranin(NRGN)	0.001	9.09	19	1	7	1	1	78	7.6	7.87	16.03	1	0	217.6	189.8	184.1	275.8	187.6	173.4	217.6	185.145	183.356	258.144	181.311	178.936		237.872	0.77028	0.0250274	0.761528	0.0996302	TRUE
Q96IV0	Q96IV0	Peptide-N(4)-(N-acetyl-beta-glucosaminyl)asparagine amidase [OS=Homo sapiens]	NGLY1	N-glycanase 1(NGLY1)	0	158.468	46	25	61	25	1	654	74.3	6.89	216.95	25	0	7700.1	6048.9	6445	8208.2	6158	6243.2	7700.1	5900.55	6418.96	7682.73	5951.55	6442.52		7691.41	0.770476	0.0232741	0.836094	0.266263	TRUE
P30044-1	P30044	Peroxiredoxin-5, mitochondrial [OS=Homo sapiens]	PRDX5	peroxiredoxin 5(PRDX5)	0	121.292	56	11	76	11	1	214	22.1	8.7	304.85	11	0	11731.2	9303.1	13456.6	12212.6	9090.2	13225.7	11731.2	9074.94	13402.2	11430.8	8785.45	13647.9		11581	0.771108	0.00903827	1.16787	0.186026	FALSE
P11498	P11498	pyruvate carboxylase, mitochondrial [OS=Homo sapiens]	PC	pyruvate carboxylase(PC)	0	222.837	38	34	108	34	1	1178	129.6	6.84	359.81	34	0	7862	6299	8628.4	8435.4	6217	8371.3	7862	6144.51	8593.54	7895.38	6008.58	8638.56		7878.69	0.771263	0.0237733	1.09359	0.468074	FALSE
P52943-2	P52943	Isoform 2 of Cysteine-rich protein 2 [OS=Homo sapiens]	CRIP2	cysteine rich protein 2(CRIP2)	0	21.951	20	3	4	3	1	282	30.2	8.22	15.7	3	0	325.7	247.3	390	334.2	260	335.4	325.7	241.235	388.425	312.805	251.284	346.108		319.253	0.771362	0.0733569	1.15039	0.538302	FALSE
P41212	P41212	Transcription factor ETV6 [OS=Homo sapiens]	ETV6	ETS variant 6(ETV6)	0.001	7.708	7	2	2	2	1	452	53	7.43	7.86	2	0	285.1	225.9	250.2	301.8	225	256.2	285.1	220.36	249.189	282.479	217.457	264.379		283.79	0.771375	0.0257317	0.90484	0.426992	TRUE
O75122	O75122	CLIP-associating protein 2 [OS=Homo sapiens]	CLASP2	cytoplasmic linker associated protein 2(CLASP2)	0	318.309	50	49	119	2	1	1294	141	8.47	405.6	49	0	306.7	228.7	191.3	314.9	244.3	185.2	306.7	223.091	190.527	294.741	236.11	191.113		300.72	0.763502	0.0210299	0.634543	0.0163124	TRUE
Q8N2A8	Q8N2A8	mitochondrial cardiolipin hydrolase [OS=Homo sapiens]	PLD6	phospholipase D family member 6(PLD6)	0	29.699	33	6	18	5	1	252	28.3	9.35	48.53	6	0	510.7	392	393.4	537	413.5	383.3	510.7	382.386	391.811	502.622	399.638	395.537		506.661	0.771742	0.0608959	0.776997	0.134936	TRUE
Q96T88-2	Q96T88	Isoform 2 of E3 ubiquitin-protein ligase UHRF1 [OS=Homo sapiens]	UHRF1	ubiquitin like with PHD and ring finger domains 1(UHRF1)	0	143.954	39	24	41	23	1	806	91.1	7.44	179.35	24	1	4479.4	3610.2	2780.6	4651	3690.5	2762.9	4479.4	3521.66	2769.37	4353.25	3566.78	2851.11		4416.33	0.802526	0.0683014	0.636329	0.00399881	TRUE
Q96LJ8	Q96LJ8	UBX domain-containing protein 10 [OS=Homo sapiens]	UBXN10	UBX domain protein 10(UBXN10)	0.001	10.236	10	2	3	2	1	280	30.8	8.62	6.54	2	0	615.6	472.3	614.8	642.9	496	615.3	615.6	460.717	612.316	601.743	479.372	634.944		608.671	0.772246	0.0614552	1.02458	0.986109	FALSE
Q8N8R3-1	Q8N8R3	mitochondrial basic amino acids transporter [OS=Homo sapiens]	SLC25A29	solute carrier family 25 member 29(SLC25A29)	0.001	7.613	7	2	2	2	1	303	32	8.75	6.75	2	0	359.9	275.4	291.1	382.2	295.8	325.3	359.9	268.646	289.924	357.732	285.883	335.685		358.816	0.77272	0.0750755	0.871769	0.375606	TRUE
Q5BKX5-1	Q5BKX5	UPF0692 protein C19orf54 [OS=Homo sapiens]	c19orf54	chromosome 19 open reading frame 54(C19orf54)	0	45.558	25	6	15	6	1	351	37.8	7.47	58.86	6	0	1151.7	913.9	1110.9	1198.3	895.3	1115.1	1151.7	891.486	1106.41	1121.59	865.285	1150.7		1136.64	0.772789	0.0356764	0.992885	0.853754	TRUE
Q13571	Q13571	Lysosomal-associated transmembrane protein 5 [OS=Homo sapiens]	LAPTM5	lysosomal protein transmembrane 5(LAPTM5)	0.001	9.475	11	2	2	2	1	262	29.9	8.68	8.61	2	0	139.6	104.1	123.2	144.4	114.7	118.8	139.6	101.547	122.702	135.156	110.855	122.593		137.378	0.773056	0.0852222	0.892775	0.39491	TRUE
Q9P0T4	Q9P0T4	zinc finger protein 581 [OS=Homo sapiens]	ZNF581	zinc finger protein 581(ZNF581)	0.001	9.15	13	3	4	3	1	197	22	8.82	10.54	3	0	163.1	136.4	148.2	167.9	118.7	122.2	163.1	133.055	147.601	157.151	114.721	126.101		160.126	0.77369	0.0860177	0.854649	0.28176	TRUE
P42575-1	P42575	caspase-2 [OS=Homo sapiens]	CASP2	caspase 2(CASP2)	0	90.064	32	12	32	12	1	452	50.7	6.81	115.78	12	0	3989	3096.4	3123.3	4221	3234.6	3135.5	3989	3020.46	3110.68	3950.78	3126.16	3235.6		3969.89	0.774155	0.0124353	0.799303	0.174119	TRUE
Q13308-6	Q13308	Isoform 6 of Inactive tyrosine-protein kinase 7 [OS=Homo sapiens]	PTK7	protein tyrosine kinase 7 (inactive)(PTK7)	0	73.854	18	13	20	13	1	1078	119.1	6.96	74.31	13	0	2350.5	1907.2	1775.7	2482.7	1819.8	1821.6	2350.5	1860.43	1768.53	2323.76	1758.79	1879.76		2337.13	0.774286	0.0283093	0.780504	0.155305	TRUE
Q96F86	Q96F86	Enhancer of mRNA-decapping protein 3 [OS=Homo sapiens]	EDC3	enhancer of mRNA decapping 3(EDC3)	0	108.466	46	20	45	20	1	508	56	7.11	170.22	20	0	6532.1	5299.2	6676.8	7231.1	5307.1	6307.1	6532.1	5169.24	6649.83	6768.18	5129.18	6508.46		6650.14	0.774301	0.0197958	0.989324	0.951304	TRUE
Q9UHQ1	Q9UHQ1	Nuclear prelamin A recognition factor [OS=Homo sapiens]	NARF	nuclear prelamin A recognition factor(NARF)	0	152.428	55	21	63	19	1	456	51.1	7.08	235.68	21	3	14508.7	13154.9	9250.2	15388.3	13035.4	8966.3	14508.7	12832.3	9212.83	14403.2	12598.4	9252.56		14455.9	0.879592	0.169737	0.638678	0.00283716	TRUE
Q7L590-1	Q7L590	Protein MCM10 homolog [OS=Homo sapiens]	MCM10	minichromosome maintenance 10 replication initiation factor(MCM10)	0	37.746	11	9	22	9	1	875	98.1	8.75	56.55	9	0	1345.4	1341.7	893.2	1556.4	1215.2	872.9	1345.4	1308.79	889.592	1456.76	1174.46	900.768		1401.08	0.886192	0.260335	0.638921	0.00989285	TRUE
Q9UKB3-1	Q9UKB3	DnaJ homolog subfamily C member 12 [OS=Homo sapiens]	DNAJC12	DnaJ heat shock protein family (Hsp40) member C12(DNAJC12)	0	38.245	44	7	21	7	1	198	23.4	5.71	51.5	7	0	782.1	625	846.5	850.5	634.2	897.8	782.1	609.672	843.08	796.053	612.939	926.463		789.076	0.77471	0.0604123	1.12128	0.614571	FALSE
Q69YQ0-1	Q69YQ0	Cytospin-A [OS=Homo sapiens]	SPECC1L	sperm antigen with calponin homology and coiled-coil domains 1 like(SPECC1L)	0	112.13	25	19	33	19	1	1117	124.5	5.72	124.56	19	0	2960.3	2324	3058.9	3048.1	2314.3	2927.3	2960.3	2267	3046.54	2852.97	2236.71	3020.76		2906.63	0.774731	0.0274118	1.0437	0.838668	FALSE
Q96HD1-2	Q96HD1	Isoform 2 of Cysteine-rich with EGF-like domain protein 1 [OS=Homo sapiens]	creld1	cysteine rich with EGF like domains 1(CRELD1)	0	43.145	26	7	12	7	1	422	45.9	5.81	38.71	7	0	671.4	559.6	992.3	851.2	612.2	1035.5	671.4	545.876	988.291	796.708	591.676	1068.56		734.054	0.774842	0.0605604	1.40102	0.0576318	FALSE
P42684	P42684	Abelson tyrosine-protein kinase 2 [OS=Homo sapiens]	ABL2	ABL proto-oncogene 2, non-receptor tyrosine kinase(ABL2)	0	142.95	31	24	47	18	1	1182	128.3	8.07	155.93	24	0	3045.2	2455.1	3197.1	3214.5	2378.5	2988	3045.2	2394.89	3184.18	3008.71	2298.76	3083.39		3026.96	0.775308	0.0277985	1.03529	0.877645	FALSE
A1L020	A1L020	RNA-binding protein MEX3A [OS=Homo sapiens]	MEX3A	mex-3 RNA binding family member A(MEX3A)	0	34.748	20	6	9	6	1	520	54.1	7.27	42.65	6	0	725.2	561.6	552.6	730.3	564.1	546.3	725.2	547.827	550.368	683.548	545.189	563.741		704.374	0.775877	0.0617291	0.79085	0.182259	TRUE
Q9BVA1	Q9BVA1	Tubulin beta-2B chain [OS=Homo sapiens]	TUBB2B	tubulin beta 2B class IIb(TUBB2B)	0	460.848	82	28	764	1	1	445	49.9	4.89	2624.32	28	0	1795.3	1023.7	1072.9	1775.5	1034.4	1109.7	1795.3	998.593	1068.57	1661.84	999.722	1145.13		1728.57	0.578026	0.000196338	0.640326	0.0143706	TRUE
Q7Z7G8-1	Q7Z7G8	vacuolar protein sorting-associated protein 13b [OS=Homo sapiens]	VPS13B	vacuolar protein sorting 13 homolog B(VPS13B)	0	98.86	9	25	36	25	1	4022	448.4	6.46	101.64	25	0	2690.7	2197.1	2197.5	2952.7	2165.8	2171.9	2690.7	2143.22	2188.62	2763.67	2093.19	2241.24		2727.19	0.776699	0.0300209	0.812167	0.225923	TRUE
P14635	P14635	G2/mitotic-specific cyclin-B1 [OS=Homo sapiens]	CCNB1	cyclin B1(CCNB1)	0	137.838	46	13	64	13	1	433	48.3	7.47	229.31	13	0	7567.9	5929.5	4663.7	8053.7	6044.7	4878.5	7567.9	5784.08	4644.86	7538.12	5842.05	5034.25		7553.01	0.769636	0.022751	0.640745	0.00927834	TRUE
P53365	P53365	Arfaptin-2 [OS=Homo sapiens]	ARFIP2	ADP ribosylation factor interacting protein 2(ARFIP2)	0	52.718	48	10	19	10	1	341	37.8	6.04	68.58	10	0	2684.9	2116.4	2234.3	2778.8	2118.8	2131.7	2684.9	2064.49	2225.27	2600.91	2047.77	2199.76		2642.9	0.777982	0.0309666	0.837153	0.295967	TRUE
Q8WYA0-1	Q8WYA0	Intraflagellar transport protein 81 homolog [OS=Homo sapiens]	IFT81	intraflagellar transport 81(IFT81)	0	21.613	9	5	10	5	1	676	79.7	8.82	20.21	5	0	647	511.1	512.4	676.9	515.8	500.9	647	498.565	510.33	633.566	498.508	516.892		640.283	0.778619	0.0689	0.802162	0.179896	TRUE
Q96L50	Q96L50	Leucine-rich repeat protein 1 [OS=Homo sapiens]	LRR1	leucine rich repeat protein 1(LRR1)	0	15.819	7	3	6	3	1	414	46.7	9.09	20.07	3	0	869.6	649.7	670.4	831	673	663.6	869.6	633.766	667.692	777.801	650.438	684.786		823.701	0.779533	0.0660071	0.820977	0.246581	TRUE
Q71RC2-4	Q71RC2	Isoform 4 of La-related protein 4 [OS=Homo sapiens]	LARP4	La ribonucleoprotein domain family member 4(LARP4)	0	147.147	42	23	58	21	1	730	81.2	6.61	210.57	23	0	5511.6	4330.6	4577.3	5656.8	4348.8	4226.1	5511.6	4224.39	4558.81	5294.66	4203.01	4361.02		5403.13	0.779862	0.0231905	0.825432	0.196594	TRUE
O75604-1	O75604	Ubiquitin carboxyl-terminal hydrolase 2 [OS=Homo sapiens]	USP2	ubiquitin specific peptidase 2(USP2)	0.001	11.4	5	3	3	3	1	605	68	8.97	9.16	3	0	209.5	169.1	155.8	226.4	169.5	172.6	209.5	164.953	155.171	211.906	163.818	178.11		210.703	0.780174	0.0320365	0.790878	0.140994	TRUE
O75381-1	O75381	Peroxisomal membrane protein PEX14 [OS=Homo sapiens]	PEX14	peroxisomal biogenesis factor 14(PEX14)	0	77.54	32	10	80	10	1	377	41.2	4.94	238.36	10	0	6809.5	5350.8	6304.6	7230.1	5563.2	6074.1	6809.5	5219.57	6279.13	6767.24	5376.7	6268.02		6788.37	0.780472	0.0235916	0.924165	0.638416	TRUE
Q58A45-3	Q58A45	Isoform 3 of PAB-dependent poly(A)-specific ribonuclease subunit PAN3 [OS=Homo sapiens]	PAN3	PAN3 poly(A) specific ribonuclease subunit(PAN3)	0	48.91	19	10	14	10	1	833	89.3	7.99	46.6	10	0	547.5	441.3	566.7	572.6	429.8	515.8	547.5	430.477	564.411	535.943	415.391	532.267		541.722	0.780722	0.0715139	1.01222	0.954567	FALSE
Q8NCE0-1	Q8NCE0	tRNA-splicing endonuclease subunit Sen2 [OS=Homo sapiens]	TSEN2	tRNA splicing endonuclease subunit 2(TSEN2)	0	48.506	25	9	17	9	1	465	53.2	7.85	53.14	9	0	948.9	748.1	737.5	967.6	743.6	688.9	948.9	729.753	734.521	905.656	718.671	710.894		927.278	0.781008	0.0678011	0.779386	0.161369	TRUE
Q8N5C7-1	Q8N5C7	DTW domain-containing protein 1 [OS=Homo sapiens]	DTWD1	DTW domain containing 1(DTWD1)	0	16.348	15	4	11	4	1	304	35.2	8.38	24.03	4	0	1295.3	892.1	1086.3	1226.3	1074	914.9	1295.3	870.221	1081.91	1147.79	1037.99	944.109		1221.55	0.781065	0.0424969	0.829285	0.23926	TRUE
Q16864-2	Q16864	Isoform 2 of V-type proton ATPase subunit F [OS=Homo sapiens]	ATP6V1F	ATPase H+ transporting V1 subunit F(ATP6V1F)	0	55.797	55	7	27	7	1	147	16.4	5.08	102.32	7	0	1939.5	1509.7	1714.5	1992.2	1551.4	1644.4	1939.5	1472.67	1707.57	1864.66	1499.39	1696.9		1902.08	0.781266	0.0504894	0.894933	0.451302	TRUE
Q6P9F7	Q6P9F7	Volume-regulated anion channel subunit LRRC8B [OS=Homo sapiens]	LRRC8B	leucine rich repeat containing 8 family member B(LRRC8B)	0	20.277	10	5	7	4	1	803	92.3	6.86	19.81	5	0	77.6	70.8	118.7	89.6	59.1	114.2	77.6	69.0636	118.22	83.864	57.1187	117.846		80.732	0.781489	0.05788	1.46204	0.0709384	FALSE
Q8NE22-1	Q8NE22	SET domain-containing protein 9 [OS=Homo sapiens]	SETD9	SET domain containing 9(SETD9)	0	19.203	13	3	5	3	1	299	34.1	8.76	16.33	3	0	53.6	51.3	57.1	62.8	39.1	57.8	53.6	50.0419	56.8693	58.7797	37.7892	59.6453		56.1898	0.781556	0.0579546	1.03679	0.94821	FALSE
Q8WXW3	Q8WXW3	Progesterone-induced-blocking factor 1 [OS=Homo sapiens]	PIBF1	progesterone immunomodulatory binding factor 1(PIBF1)	0	119.947	36	27	41	26	1	757	89.8	6.02	126.24	27	1	5426.6	4362.7	4107.5	5835.2	4412.7	3971.7	5426.6	4255.7	4090.91	5461.64	4264.77	4098.5		5444.12	0.782539	0.0249968	0.752133	0.0572868	TRUE
Q9Y2Y0	Q9Y2Y0	ADP-ribosylation factor-like protein 2-binding protein [OS=Homo sapiens]	ARL2BP	ADP ribosylation factor like GTPase 2 binding protein(ARL2BP)	0.007	4.757	7	1	2	1	1	163	18.8	4.35	5.66	1	0	163.4	133.2	210.1	178.5	133.3	194.3	163.4	129.933	209.251	167.073	128.831	200.503		165.236	0.783013	0.098418	1.2399	0.394794	FALSE
A6NFQ2	A6NFQ2	TRPM8 channel-associated factor 2 [OS=Homo sapiens]	TCAF2	TRPM8 channel associated factor 2(TCAF2)	0	67.968	20	15	37	15	1	919	100.8	7.17	110.83	15	0	2584.4	2170.9	3257	2954.2	2143	3043.4	2584.4	2117.66	3243.84	2765.08	2071.16	3140.56		2674.74	0.783032	0.0349422	1.19346	0.257162	FALSE
Q96FC9-1	Q96FC9	ATP-dependent DNA helicase DDX11 [OS=Homo sapiens]	DDX11	DEAD/H-box helicase 11(DDX11)	0	52.562	15	12	15	4	1	970	108.2	7.31	55.45	12	7	2575.5	2015.8	2204.3	2722.9	2117.4	2153.8	2575.5	1966.36	2195.4	2548.59	2046.41	2222.56		2562.04	0.783121	0.0350153	0.862194	0.379429	TRUE
Q9UKM9-2	Q9UKM9	Isoform 1 of RNA-binding protein Raly [OS=Homo sapiens]	RALY	RALY heterogeneous nuclear ribonucleoprotein(RALY)	0	144.75	69	19	107	1	1	290	30.3	9.63	356.9	19	0	93.2	110.3	89.4	149.6	109.4	58.7	93.2	107.595	89.0388	140.023	105.732	60.574		116.611	0.914693	0.455964	0.641502	0.0193985	TRUE
P31321	P31321	cAMP-dependent protein kinase type I-beta regulatory subunit [OS=Homo sapiens]	PRKAR1B	protein kinase cAMP-dependent type I regulatory subunit beta(PRKAR1B)	0	83.387	43	16	35	12	1	381	43	5.71	123.12	16	0	3417.3	2246.9	4380.2	2843.2	2663.1	3631.5	3417.3	2191.79	4362.51	2661.18	2573.82	3747.44		3039.24	0.784014	0.0342254	1.33421	0.0549346	FALSE
Q6NVY1	Q6NVY1	3-hydroxyisobutyryl-CoA hydrolase, mitochondrial [OS=Homo sapiens]	HIBCH	3-hydroxyisobutyryl-CoA hydrolase(HIBCH)	0	101.056	49	19	49	19	1	386	43.5	8.19	152.85	19	0	6587.3	5398.4	5759.8	7222.3	5378.8	5784.1	6587.3	5266	5736.53	6759.94	5198.48	5968.76		6673.62	0.784018	0.0260468	0.876982	0.388442	TRUE
Q9H2G4	Q9H2G4	testis-specific Y-encoded-like protein 2 [OS=Homo sapiens]	TSPYL2	TSPY like 2(TSPYL2)	0	16.232	5	4	10	2	1	693	79.4	4.58	23.75	4	0	157.6	121.2	162.5	153.1	121.8	168.3	157.6	118.228	161.844	143.299	117.717	173.673		150.449	0.784131	0.0999974	1.11505	0.742508	FALSE
Q96HJ9-1	Q96HJ9	Protein FMC1 homolog [OS=Homo sapiens]	FMC1	formation of mitochondrial complex V assembly factor 1 homolog(FMC1)	0.001	10.761	27	3	6	3	1	113	12.7	10.07	15.87	3	0	667.5	561.2	608.4	738.4	535.9	572.3	667.5	547.436	605.942	691.129	517.934	590.571		679.315	0.784151	0.0759496	0.880677	0.389185	TRUE
Q9GZP1	Q9GZP1	Neurensin-2 [OS=Homo sapiens]	NRSN2	neurensin 2(NRSN2)	0.007	4.907	6	1	1	1	1	204	22	4.83	3.94	1	0	108.6	89.1	99.8	121.1	90.2	102.6	108.6	86.9148	99.3968	113.347	87.1761	105.876		110.974	0.784379	0.100349	0.92487	0.508734	TRUE
P08243-1	P08243	Asparagine synthetase [glutamine-hydrolyzing] [OS=Homo sapiens]	ASNS	asparagine synthetase (glutamine-hydrolyzing)(ASNS)	0	383.888	67	34	297	34	1	561	64.3	6.86	981.57	34	0	40160.2	40857.7	26217.7	40238.5	40321.1	23139.2	40160.2	39855.7	26111.8	37662.5	38969.3	23877.9		38911.4	1.01288	0.942845	0.642354	0.000665837	FALSE
Q149N8	Q149N8	E3 ubiquitin-protein ligase SHPRH [OS=Homo sapiens]	SHPRH	SNF2 histone linker PHD RING helicase(SHPRH)	0	112.823	16	19	36	19	1	1683	193	7.47	118	19	0	4598.8	3737.8	3496	4793.5	3605.9	3439.7	4598.8	3646.13	3481.88	4486.63	3485.01	3549.52		4542.71	0.784899	0.0473107	0.77392	0.0826182	TRUE
Q86XT9	Q86XT9	Insulin-like growth factor-binding protein 3 receptor [OS=Homo sapiens]	TMEM219	transmembrane protein 219(TMEM219)	0.001	11.251	11	2	5	2	1	240	25.7	8.4	15.67	2	0	81.2	59	79.8	85.9	71.7	80.8	81.2	57.553	79.4776	80.4009	69.2963	83.3796		80.8004	0.784954	0.0618166	1.00777	0.812814	FALSE
O75348	O75348	V-type proton ATPase subunit G 1 [OS=Homo sapiens]	ATP6V1G1	ATPase H+ transporting V1 subunit G1(ATP6V1G1)	0	28.896	40	5	9	5	1	118	13.7	8.79	33.74	5	0	2305.9	1859.4	2053.1	2532.2	1921.8	1895.3	2305.9	1813.8	2044.81	2370.09	1857.37	1955.81		2338	0.78511	0.0367	0.855565	0.356037	TRUE
Q9UBL6-1	Q9UBL6	Copine-7 [OS=Homo sapiens]	CPNE7	copine 7(CPNE7)	0	33.096	20	9	12	8	1	633	70.2	6.38	39.37	9	0	1032.1	841.7	733.5	1239.7	836.8	658.5	1032.1	821.057	730.537	1160.34	808.746	679.523		1096.22	0.743375	0.0184524	0.643147	0.021107	TRUE
P42167-2	P42167	Isoform Gamma of Lamina-associated polypeptide 2, isoforms beta/gamma [OS=Homo sapiens]	TMPO	thymopoietin(TMPO)	0	135.788	52	13	102	1	1	345	38.7	9.16	340.07	13	0	11.1	11.5	12.8	29	13	11.5	11.1	11.218	12.7483	27.1435	12.5642	11.8671		19.1217	0.621861	0.00122834	0.643651	0.0167135	TRUE
P49366-1	P49366	deoxyhypusine synthase [OS=Homo sapiens]	DHPS	deoxyhypusine synthase(DHPS)	0	96.617	60	14	46	14	1	369	40.9	5.36	173.35	14	0	5965.2	4766.7	5709	6180.7	4739.9	5471.2	5965.2	4649.8	5685.94	5785.02	4581	5645.87		5875.11	0.785584	0.0271997	0.964391	0.892407	TRUE
Q5FWF4-1	Q5FWF4	DNA annealing helicase and endonuclease ZRANB3 [OS=Homo sapiens]	ZRANB3	zinc finger RANBP2-type containing 3(ZRANB3)	0	15.267	5	4	6	4	1	1079	123.2	8.44	17.14	4	0	602.5	510.5	461.7	655.2	473	495.9	602.5	497.98	459.835	613.255	457.143	511.732		607.878	0.785621	0.0779182	0.799147	0.173985	TRUE
P34949	P34949	mannose-6-phosphate isomerase [OS=Homo sapiens]	MPI	mannose phosphate isomerase(MPI)	0	81.29	42	12	25	12	1	423	46.6	5.95	102.11	12	0	5904.7	4599.7	4712.9	6050.7	4764.8	4702.4	5904.7	4486.89	4693.86	5663.35	4605.06	4852.53		5784.02	0.785954	0.0274781	0.825238	0.196036	TRUE
Q6ZRP7	Q6ZRP7	Sulfhydryl oxidase 2 [OS=Homo sapiens]	QSOX2	quiescin sulfhydryl oxidase 2(QSOX2)	0	38.385	13	7	15	7	1	698	77.5	7.72	47.25	7	0	412.8	324.8	365.1	422	329.1	345.5	412.8	316.834	363.625	394.984	318.067	356.53		403.892	0.785979	0.0936289	0.891519	0.444833	TRUE
Q9NR77	Q9NR77	Peroxisomal membrane protein 2 [OS=Homo sapiens]	PXMP2	peroxisomal membrane protein 2(PXMP2)	0.002	7.072	5	1	2	1	1	195	22.2	10.58	5.48	1	0	98.9	85.3	98.8	112.8	80.2	81.6	98.9	83.208	98.4009	105.579	77.5113	84.2052		102.239	0.785995	0.102673	0.893032	0.395755	TRUE
Q49A88-1	Q49A88	Coiled-coil domain-containing protein 14 [OS=Homo sapiens]	CCDC14	coiled-coil domain containing 14(CCDC14)	0	60.724	21	12	14	12	1	953	106.2	8.4	51.97	12	0	1618.8	1174.7	1013.5	1728	1226.5	1042.9	1618.8	1145.89	1009.41	1617.38	1185.38	1076.2		1618.09	0.720378	0.00668988	0.644465	0.0110644	TRUE
Q4G0T1	Q4G0T1	Scavenger receptor cysteine-rich domain-containing protein SCART1 [OS=Homo sapiens]	SCART1	scavenger receptor protein family member(SCART1)	0.001	11.771	2	2	5	2	1	1027	108.5	6.15	16.38	2	0	184.9	146.9	171.2	209.1	161.5	142.8	184.9	143.297	170.508	195.714	156.086	147.359		190.307	0.786579	0.0374207	0.835144	0.226723	TRUE
P09104	P09104	Gamma-enolase [OS=Homo sapiens]	ENO2	enolase 2(ENO2)	0	215.868	67	22	386	16	1	434	47.2	5.03	1388.67	22	1	8114.3	6357.8	5934.7	8205.6	6438.6	5778.3	8114.3	6201.87	5910.73	7680.29	6222.75	5962.78		7897.3	0.786638	0.0355592	0.751745	0.0792531	TRUE
P58107	P58107	epiplakin [OS=Homo sapiens]	EPPK1	epiplakin 1(EPPK1)	0	567.984	53	94	210	88	1	5090	555.3	5.6	785.53	94	1	21869.4	18006.1	19526.5	23251.2	17348.4	19358.6	21869.4	17564.5	19447.6	21762.7	16766.8	19976.6		21816.1	0.786836	0.00523976	0.903561	0.474412	TRUE
P29966	P29966	Myristoylated alanine-rich C-kinase substrate [OS=Homo sapiens]	MARCKS	myristoylated alanine rich protein kinase C substrate(MARCKS)	0	27.405	21	4	6	4	1	332	31.5	4.45	28.58	4	0	863.9	641.8	698.8	723	606.5	661.5	863.9	626.06	695.977	676.715	586.167	682.619		770.307	0.786846	0.0752982	0.894835	0.465804	TRUE
Q9BTM9-2	Q9BTM9	Isoform 2 of Ubiquitin-related modifier 1 [OS=Homo sapiens]	URM1	ubiquitin related modifier 1(URM1)	0.001	9.295	9	1	4	1	1	146	15.8	5.26	8.15	1	0	355.3	299.2	336.4	367.9	267.7	313.6	355.3	291.862	335.041	344.348	258.725	323.612		349.824	0.786949	0.0951209	0.941407	0.648396	TRUE
Q7Z6J9	Q7Z6J9	tRNA-splicing endonuclease subunit Sen54 [OS=Homo sapiens]	TSEN54	tRNA splicing endonuclease subunit 54(TSEN54)	0	53.758	28	10	19	10	1	526	58.8	7.91	60.53	10	0	1749.6	1392	1352.7	1792.2	1385.6	1377.6	1749.6	1357.86	1347.24	1677.47	1339.15	1421.58		1713.53	0.786973	0.0566304	0.807926	0.182745	TRUE
O75208-1	O75208	Ubiquinone biosynthesis protein COQ9, mitochondrial [OS=Homo sapiens]	COQ9	coenzyme Q9(COQ9)	0	47.138	31	7	25	7	1	318	35.5	5.94	89.91	7	0	3142.8	2558.3	3715.4	3568.3	2696.7	3356.4	3142.8	2495.56	3700.39	3339.86	2606.29	3463.56		3241.33	0.786999	0.036704	1.10509	0.571254	FALSE
Q9BX63	Q9BX63	Fanconi anemia group J protein [OS=Homo sapiens]	BRIP1	BRCA1 interacting protein C-terminal helicase 1(BRIP1)	0	25.384	4	4	7	4	1	1249	140.8	6.92	30.37	4	0	374.5	313.3	271.6	420.9	309.6	271.7	374.5	305.616	270.503	393.955	299.221	280.374		384.227	0.787082	0.095326	0.716863	0.0653873	TRUE
P49069	P49069	calcium signal-modulating cyclophilin ligand [OS=Homo sapiens]	CAMLG	calcium modulating ligand(CAMLG)	0	35.775	32	6	9	6	1	296	32.9	8.05	36.14	6	0	1276.3	1375.8	849	1504.1	1522.2	857.4	1276.3	1342.06	845.57	1407.81	1471.17	884.773		1342.06	1.0481	0.71087	0.644662	0.0111082	FALSE
P30305-1	P30305	M-phase inducer phosphatase 2 [OS=Homo sapiens]	cdc25b	cell division cycle 25B(CDC25B)	0	20.128	10	5	7	5	1	580	64.9	6.4	24.16	5	0	575.4	382.4	335.7	526.1	379	343.4	575.4	373.022	334.344	492.42	366.294	354.363		533.91	0.69236	0.0120328	0.644966	0.0213322	TRUE
Q6PIJ6-1	Q6PIJ6	F-box only protein 38 [OS=Homo sapiens]	FBXO38	F-box protein 38(FBXO38)	0	54.21	11	11	16	11	1	1188	133.9	6.33	54.09	11	0	1814.8	1545.1	1597.5	2135.9	1547.3	1554.8	1814.8	1507.21	1591.05	1999.16	1495.43	1604.44		1906.98	0.787274	0.0569704	0.837838	0.257105	TRUE
Q9NWY4	Q9NWY4	Histone PARylation factor 1 [OS=Homo sapiens]	Hpf1	histone PARylation factor 1(HPF1)	0	69.897	49	12	26	12	1	346	39.4	6.8	98.6	12	0	2517.9	2328.9	1587	2644.9	2408	1590.1	2517.9	2271.78	1580.59	2475.58	2327.27	1640.87		2496.74	0.921012	0.432633	0.645132	0.0203753	TRUE
Q6NS38-1	Q6NS38	DNA oxidative demethylase ALKBH2 [OS=Homo sapiens]	ALKBH2	alkB homolog 2, alpha-ketoglutarate dependent dioxygenase(ALKBH2)	0	23.995	22	4	11	4	1	261	29.3	9.66	36.64	4	0	794	608.2	511.8	831	645.5	490.8	794	593.284	509.732	777.801	623.86	506.469		785.901	0.774362	0.060025	0.646521	0.0297886	TRUE
Q13356	Q13356	Peptidyl-prolyl cis-trans isomerase-like 2 [OS=Homo sapiens]	PPIL2	peptidylprolyl isomerase like 2(PPIL2)	0	266.522	68	33	183	4	1	520	58.8	8.78	567.52	33	33	18221	14619.8	14727.1	19525.2	14993	14351	18221	14261.2	14667.6	18275.2	14490.4	14809.2		18248.1	0.787797	0.0136733	0.807666	0.159103	TRUE
O95644-1	O95644	Nuclear factor of activated T-cells, cytoplasmic 1 [OS=Homo sapiens]	NFATC1	nuclear factor of activated T-cells 1(NFATC1)	0	86.255	22	15	39	15	1	943	101.2	6.99	105.22	15	0	2909	2312.4	2379.6	2988.8	2319	2311.6	2909	2255.69	2369.99	2797.46	2241.26	2385.4		2853.23	0.788044	0.0376069	0.833334	0.194494	TRUE
Q9Y597	Q9Y597	BTB/POZ domain-containing protein KCTD3 [OS=Homo sapiens]	KCTD3	potassium channel tetramerization domain containing 3(KCTD3)	0	36.299	9	6	11	6	1	815	88.9	7.03	38.2	6	0	1436.4	1138.7	1122.1	1479.4	1152.1	1122.5	1436.4	1110.77	1117.57	1384.69	1113.48	1158.34		1410.55	0.788436	0.0393208	0.806746	0.160866	TRUE
Q5VST9-6	Q5VST9	Isoform 5 of Obscurin [OS=Homo sapiens]	OBSCN	obscurin, cytoskeletal calmodulin and titin-interacting RhoGEF(OBSCN)	0.008	4.287	0	1	1	1	1	8483	924.4	5.97	3.42	1	0	41.6	38	42.3	45.7	30.5	44.1	41.6	37.068	42.1291	42.7744	29.4775	45.5079		42.1872	0.788694	0.06631	1.03867	0.95705	FALSE
P08514-1	P08514	integrin alpha-IIb [OS=Homo sapiens]	ITGA2B	integrin subunit alpha 2b(ITGA2B)	0.001	10.099	3	3	5	3	1	1039	113.3	5.38	15.24	3	0	195.2	161.9	167.9	223.7	166.8	191.3	195.2	157.929	167.222	209.379	161.208	197.407		202.29	0.788813	0.0394714	0.901255	0.414689	TRUE
Q96IF1	Q96IF1	LIM domain-containing protein ajuba [OS=Homo sapiens]	AJUBA	ajuba LIM protein(AJUBA)	0.001	7.569	5	2	4	1	1	538	56.9	7.14	10.62	2	0	56.7	41.5	40.6	56	47.2	45.1	56.7	40.4822	40.436	52.415	45.6176	46.5399		54.5575	0.789074	0.0667821	0.797103	0.137733	TRUE
Q13042	Q13042	cell division cycle protein 16 homolog [OS=Homo sapiens]	CDC16	cell division cycle 16(CDC16)	0	130.666	40	21	47	21	1	620	71.6	5.85	177.51	21	0	7582.4	5988.8	6696	7927.3	6208.9	6713.9	7582.4	5841.92	6668.95	7419.81	6000.75	6928.25		7501.1	0.789395	0.0381311	0.906346	0.564685	TRUE
Q9H6S0	Q9H6S0	Probable ATP-dependent RNA helicase YTHDC2 [OS=Homo sapiens]	YTHDC2	YTH domain containing 2(YTHDC2)	0	243.413	36	40	87	40	1	1430	160.1	8.4	307.29	40	0	8085.8	6403.6	6715.6	8315.6	6508	6492	8085.8	6246.55	6688.47	7783.25	6289.82	6699.26		7934.53	0.789989	0.0387049	0.843638	0.291805	TRUE
Q5TAX3	Q5TAX3	Terminal uridylyltransferase 4 [OS=Homo sapiens]	ZCCHC11	zinc finger CCHC-type containing 11(ZCCHC11)	0	179.434	27	39	84	37	1	1644	185	7.97	238.88	39	1	9183.1	7227.7	8179.7	9622.9	7586.8	7795.5	9183.1	7050.44	8146.66	9006.86	7332.45	8044.38		9094.98	0.790705	0.0170017	0.890108	0.477085	TRUE
Q8NFU7	Q8NFU7	methylcytosine dioxygenase TET1 [OS=Homo sapiens]	TET1	tet methylcytosine dioxygenase 1(TET1)	0.001	12.357	3	3	3	3	1	2136	235.2	8.24	12.03	3	0	87.5	70.5	64.4	87	67.1	65.7	87.5	68.771	64.1398	81.4304	64.8505	67.7975		84.4652	0.790985	0.11012	0.781016	0.130499	TRUE
Q13427	Q13427	peptidyl-prolyl cis-trans isomerase g [OS=Homo sapiens]	PPIG	peptidylprolyl isomerase G(PPIG)	0	117.318	19	15	59	15	1	754	88.6	10.29	187.32	15	0	7273.7	7519.9	4621.6	7851.9	7589.3	4702	7273.7	7335.47	4602.93	7349.24	7334.87	4852.12		7311.47	1.00324	0.897508	0.64659	0.0105565	FALSE
P68402-1	P68402	platelet-activating factor acetylhydrolase IB subunit beta [OS=Homo sapiens]	PAFAH1B2	platelet activating factor acetylhydrolase 1b catalytic subunit 2(PAFAH1B2)	0	97.231	62	10	59	10	1	229	25.6	5.92	164.78	10	0	4965.7	3853.2	6186	5219.1	4176.3	5394.7	4965.7	3758.7	6161.01	4884.98	4036.29	5566.93		4925.34	0.791315	0.0542177	1.19057	0.249568	FALSE
Q9BQP7	Q9BQP7	mitochondrial genome maintenance exonuclease 1 [OS=Homo sapiens]	MGME1	mitochondrial genome maintenance exonuclease 1(MGME1)	0	100.236	47	17	28	17	1	344	39.4	7.68	110.52	17	0	5206.6	4452.1	4158.2	6071	4423.2	4019	5206.6	4342.91	4141.4	5682.35	4274.91	4147.31		5444.47	0.791429	0.0318985	0.761204	0.0679031	TRUE
Q9Y530	Q9Y530	O-acetyl-ADP-ribose deacetylase 1 [OS=Homo sapiens]	OARD1	O-acyl-ADP-ribose deacylase 1(OARD1)	0	42.828	52	9	24	9	1	152	17	8.31	59.79	9	0	5693.9	4814.9	4530.2	6206.8	4564.3	4701.8	5693.9	4696.81	4511.9	5809.45	4411.28	4851.91		5751.68	0.791777	0.0321998	0.814007	0.165636	TRUE
O14974	O14974	Protein phosphatase 1 regulatory subunit 12A [OS=Homo sapiens]	PPP1R12A	protein phosphatase 1 regulatory subunit 12A(PPP1R12A)	0	266.006	42	41	102	40	1	1030	115.2	5.4	366.13	41	1	15492.6	19440.6	9952.1	15970.5	19600.1	9495	15492.6	18963.8	9911.9	14948.1	18943	9798.14		15220.4	1.24527	0.00699614	0.647489	0.00370033	FALSE
O94788-1	O94788	retinal dehydrogenase 2 [OS=Homo sapiens]	ALDH1A2	aldehyde dehydrogenase 1 family member A2(ALDH1A2)	0	328.759	66	29	236	27	1	518	56.7	6.05	893.48	29	2	32153	25746.6	26813.6	33408.9	25994.8	26143.5	32153	25115.2	26705.3	31270.1	25123.3	26978.2		31711.6	0.792116	0.00642399	0.846433	0.192509	TRUE
P48201	P48201	ATP synthase F(0) complex subunit C3, mitochondrial [OS=Homo sapiens]	ATP5G3	ATP synthase, H+ transporting, mitochondrial Fo complex subunit C3 (subunit 9)(ATP5G3)	0.006	4.96	13	2	3	2	1	142	14.7	9.45	8.03	2	0	337.4	343.5	221	376.8	339	219.8	337.4	335.076	220.107	352.678	327.635	226.817		345.039	0.960342	0.751918	0.647643	0.0232045	TRUE
Q96BY7	Q96BY7	autophagy-related protein 2 homolog B [OS=Homo sapiens]	atg2b	autophagy related 2B(ATG2B)	0	143.46	18	33	53	32	1	2078	232.6	5.76	170.42	33	1	5310.5	4307.4	4904.2	5579.1	4289.5	4714.1	5310.5	4201.76	4884.39	5221.94	4145.7	4864.6		5266.22	0.792547	0.0556369	0.925616	0.634079	TRUE
Q99708-2	Q99708	Isoform 2 of DNA endonuclease RBBP8 [OS=Homo sapiens]	RBBP8	RB binding protein 8, endonuclease(RBBP8)	0	19.82	6	4	7	4	1	902	102.5	6.3	24.49	4	0	931.8	733	594.2	957.6	681	574	931.8	715.023	591.8	896.296	658.17	592.325		914.048	0.75116	0.0384406	0.647737	0.0303249	TRUE
Q6UWP2	Q6UWP2	Dehydrogenase/reductase SDR family member 11 [OS=Homo sapiens]	DHRS11	dehydrogenase/reductase 11(DHRS11)	0	88.498	66	12	38	12	1	260	28.3	6.64	131.13	12	0	4416.3	3644.1	3738.5	4853.8	3671.7	3692	4416.3	3554.73	3723.4	4543.07	3548.61	3809.87		4479.68	0.792839	0.0559768	0.840826	0.237961	TRUE
P61764	P61764	Syntaxin-binding protein 1 [OS=Homo sapiens]	STXBP1	syntaxin binding protein 1(STXBP1)	0	205.776	57	31	84	29	1	594	67.5	6.96	277.2	31	0	7632.4	6284.1	7814.7	8239.9	6245.5	7698.4	7632.4	6129.98	7783.13	7712.4	6036.12	7944.18		7672.4	0.792849	0.0415737	1.02493	0.779691	FALSE
A2RUB6-1	A2RUB6	Coiled-coil domain-containing protein 66 [OS=Homo sapiens]	CCDC66	coiled-coil domain containing 66(CCDC66)	0	13.553	5	4	4	4	1	948	109.3	8.25	14.14	4	0	482	346.7	319	475.1	348.7	274.8	482	338.197	317.711	444.685	337.01	283.573		463.343	0.728626	0.0336666	0.648855	0.0236624	TRUE
Q15004-1	Q15004	PCNA-associated factor [OS=Homo sapiens]	KIAA0101	KIAA0101(KIAA0101)	0	69.553	76	8	30	8	1	111	12	9.83	109.27	8	0	2735.1	2175.8	1955	2745.2	2157.6	1806.2	2735.1	2122.44	1947.1	2569.46	2085.27	1863.86		2652.28	0.793224	0.0443039	0.718433	0.0668105	TRUE
Q92609-2	Q92609	Isoform 2 of TBC1 domain family member 5 [OS=Homo sapiens]	TBC1D5	TBC1 domain family member 5(TBC1D5)	0	151.823	43	24	48	24	1	817	91.2	6.33	175.77	24	0	4395.3	3540	3735.8	4717	3659.9	3599.3	4395.3	3453.18	3720.71	4415.03	3537.2	3714.21		4405.16	0.793431	0.0566726	0.843887	0.248222	TRUE
O75153	O75153	Clustered mitochondria protein homolog [OS=Homo sapiens]	CLUH	clustered mitochondria homolog(CLUH)	0	376.179	53	55	143	55	1	1309	146.6	6.13	558.98	55	0	18533.2	17450.7	11845.7	19266.4	17822.4	11562.9	18533.2	17022.7	11797.8	18033	17224.9	11932.1		18283.1	0.936592	0.487333	0.648957	0.00386538	TRUE
Q8IZ69	Q8IZ69	tRNA (uracil-5-)-methyltransferase homolog A [OS=Homo sapiens]	TRMT2A	tRNA methyltransferase 2 homolog A(TRMT2A)	0	215.021	61	32	78	32	1	625	68.7	7.94	292.96	32	0	12166.8	9824	10725.8	12721.6	9862.4	10467.2	12166.8	9583.06	10682.5	11907.2	9531.77	10801.4		12037	0.794003	0.018825	0.892409	0.489284	TRUE
P24522-1	P24522	growth arrest and DNA damage-inducible protein GADD45 alpha [OS=Homo sapiens]	GADD45A	growth arrest and DNA damage inducible alpha(GADD45A)	0.001	7.844	14	2	2	2	1	165	18.3	4.5	6.29	2	0	105.6	76.6	88.4	91.4	79.8	84.2	105.6	74.7214	88.0429	85.5488	77.1247	86.8882		95.5744	0.794387	0.115436	0.915157	0.472577	TRUE
P53667-1	P53667	LIM domain kinase 1 [OS=Homo sapiens]	LIMK1	LIM domain kinase 1(LIMK1)	0	17.292	7	4	5	4	1	647	72.5	6.98	12.59	4	0	319.3	244.9	384.6	348.5	283.5	368.5	319.3	238.894	383.046	326.19	273.996	380.265		322.745	0.794574	0.107509	1.18253	0.44623	FALSE
Q9Y4I5	Q9Y4I5	Tesmin [OS=Homo sapiens]	TESMIN	testis expressed metallothionein like protein(TESMIN)	0.001	7.728	5	2	4	2	1	508	55	5.71	13.5	2	0	38.2	23	28.9	33.9	34.3	30.4	38.2	22.4359	28.7833	31.7298	33.1501	31.3705		34.9649	0.794883	0.0743371	0.860203	0.266723	TRUE
O43439-4	O43439	Isoform 4 of Protein CBFA2T2 [OS=Homo sapiens]	CBFA2T2	CBFA2/RUNX1 translocation partner 2(CBFA2T2)	0	26.983	16	8	9	6	1	614	67.9	7.83	21.67	8	0	437.3	337.5	340.9	430.1	350.2	338.2	437.3	329.223	339.523	402.566	338.46	348.997		419.933	0.794987	0.108214	0.819798	0.227449	TRUE
Q9UL54-2	Q9UL54	Isoform 2 of Serine/threonine-protein kinase TAO2 [OS=Homo sapiens]	TAOK2	TAO kinase 2(TAOK2)	0	82.234	21	16	32	4	1	1049	119.2	7.47	107.23	16	9	1923	1572.8	1607.5	2017.2	1547.6	1569.5	1923	1534.23	1601.01	1888.06	1495.72	1619.61		1905.53	0.795039	0.0663591	0.84507	0.277864	TRUE
Q9NYK6-1	Q9NYK6	Protein EURL homolog [OS=Homo sapiens]	c21orf91	chromosome 21 open reading frame 91(C21orf91)	0	15.469	14	3	3	3	1	297	33.9	6.57	12.33	3	0	149.3	132.1	129.6	171.3	121.4	138.8	149.3	128.86	129.076	160.334	117.33	143.231		154.817	0.795102	0.116578	0.879451	0.35258	TRUE
Q8N196	Q8N196	homeobox protein SIX5 [OS=Homo sapiens]	SIX5	SIX homeobox 5(SIX5)	0	16.712	7	4	5	3	1	739	74.5	4.96	16.06	4	0	95.4	76.7	75.2	99.9	78	79.1	95.4	74.8189	74.8962	93.5046	75.3851	81.6253		94.4523	0.795131	0.116626	0.828575	0.218441	TRUE
Q9UKT5	Q9UKT5	F-box only protein 4 [OS=Homo sapiens]	FBXO4	F-box protein 4(FBXO4)	0	53.472	26	8	25	8	1	387	44.1	6.16	70.4	8	0	2353.5	1746.4	1723.6	2266.7	1919.1	1601.7	2353.5	1703.57	1716.64	2121.59	1854.76	1652.84		2237.55	0.795142	0.0462833	0.75294	0.108723	TRUE
P36543	P36543	V-type proton ATPase subunit E 1 [OS=Homo sapiens]	ATP6V1E1	ATPase H+ transporting V1 subunit E1(ATP6V1E1)	0	180.449	61	19	127	19	1	226	26.1	8	354.27	19	0	12685.3	10136.4	11078.8	13040.1	10258.6	10316.8	12685.3	9887.8	11034	12205.3	9914.68	10646.2		12445.3	0.795581	0.0197558	0.87102	0.382553	TRUE
Q9Y496	Q9Y496	kinesin-like protein KIF3A [OS=Homo sapiens]	KIF3A	kinesin family member 3A(KIF3A)	0	64.302	19	12	25	11	1	699	80	6.54	83.74	12	0	2142.9	1803	2610.4	2363	1765.5	2550.3	2142.9	1758.78	2599.85	2211.73	1706.31	2631.72		2177.31	0.795727	0.0469019	1.20138	0.238691	FALSE
Q9Y5A7	Q9Y5A7	NEDD8 ultimate buster 1 [OS=Homo sapiens]	NUB1	negative regulator of ubiquitin like proteins 1(NUB1)	0	120.596	41	23	37	23	1	615	70.5	5.96	148.42	23	0	6390.1	5606.5	4034.4	6517.2	5893.3	3968.3	6390.1	5469	4018.1	6099.98	5695.73	4094.99		6245.04	0.893887	0.297454	0.649563	0.0058793	TRUE
Q9ULT8	Q9ULT8	E3 ubiquitin-protein ligase hectd1 [OS=Homo sapiens]	hectd1	HECT domain E3 ubiquitin protein ligase 1(HECTD1)	0	273.1	26	52	102	52	1	2610	289.2	5.35	338.78	52	0	10720.2	8645.1	13342.8	11300.4	8821.7	12048	10720.2	8433.08	13288.9	10577	8525.95	12432.6		10648.6	0.796304	0.0201961	1.20774	0.110912	FALSE
Q9UHW9	Q9UHW9	Solute carrier family 12 member 6 [OS=Homo sapiens]	SLC12A6	solute carrier family 12 member 6(SLC12A6)	0	58.367	13	12	22	8	1	1150	127.5	7.08	61.84	12	0	881.9	741.6	1150.8	971.9	727.8	1116.5	881.9	723.412	1146.15	909.681	703.401	1152.15		895.79	0.796399	0.0890146	1.28283	0.190485	FALSE
Q13322-1	Q13322	Growth factor receptor-bound protein 10 [OS=Homo sapiens]	GRB10	growth factor receptor bound protein 10(GRB10)	0	61.493	26	12	21	12	1	594	67.2	7.87	61.97	12	0	2688	2274.3	1796.6	2876.8	2396.5	1659.3	2688	2218.52	1789.34	2692.63	2316.16	1712.27		2690.32	0.842778	0.12464	0.650782	0.0224966	TRUE
Q9HBL8	Q9HBL8	NmrA-like family domain-containing protein 1 [OS=Homo sapiens]	NMRAL1	NmrA like redox sensor 1(NMRAL1)	0	37.022	31	10	19	10	1	299	33.3	7.52	56.42	10	0	3494.2	2532.7	2193.1	3701	2567.6	2273	3494.2	2470.58	2184.24	3464.07	2481.52	2345.57		3479.13	0.711687	0.00155386	0.650996	0.0203633	TRUE
Q99909	Q99909	Protein SSX3 [OS=Homo sapiens]	SSX3	SSX family member 3(SSX3)	0	15.849	21	4	19	1	1	188	21.7	8.78	28.56	4	0	105.3	83.4	64.9	105.8	93.3	66.3	105.3	81.3546	64.6378	99.0269	90.1721	68.4167		102.163	0.839472	0.206353	0.651185	0.0225792	TRUE
P50454	P50454	Serpin H1 [OS=Homo sapiens]	SERPINH1	serpin family H member 1(SERPINH1)	0	288.89	67	28	201	28	1	418	46.4	8.69	654.51	28	0	26531.9	21858	25224	29187.4	22400.1	24199.8	26531.9	21321.9	25122.1	27318.9	21649.1	24972.4		26925.4	0.797966	0.00801235	0.930247	0.659423	TRUE
Q9Y620-1	Q9Y620	DNA repair and recombination protein RAD54B [OS=Homo sapiens]	RAD54B	RAD54 homolog B (S. cerevisiae)(RAD54B)	0	61.977	18	13	19	13	1	910	102.9	8.12	71.5	13	0	1879	1480.8	1372.9	1934.7	1552.8	1373.7	1879	1444.48	1367.35	1810.84	1500.74	1417.56		1844.92	0.798198	0.0705267	0.75475	0.091742	TRUE
P43268	P43268	ETS translocation variant 4 [OS=Homo sapiens]	ETV4	ETS variant 4(ETV4)	0	23.189	18	5	12	4	1	484	53.9	5.52	38.86	5	1	1042.8	831.2	989.8	1057.4	840.2	960.8	1042.8	810.815	985.801	989.707	812.032	991.474		1016.25	0.798446	0.0604556	0.972826	0.759587	TRUE
P23276	P23276	kell blood group glycoprotein [OS=Homo sapiens]	KEL	Kell blood group, metallo-endopeptidase(KEL)	0.001	9.561	5	3	6	3	1	732	82.8	7.9	16.7	3	0	355	233.6	248.9	459	238.5	255.1	355	227.871	247.895	429.616	230.504	263.244		392.308	0.584203	0.00115047	0.651451	0.0246696	TRUE
Q9H1A4	Q9H1A4	anaphase-promoting complex subunit 1 [OS=Homo sapiens]	ANAPC1	anaphase promoting complex subunit 1(ANAPC1)	0	181.872	21	32	87	32	1	1944	216.4	6.3	269.05	32	0	8907.9	7235.8	7249.9	9349.3	7295.4	7092.7	8907.9	7058.34	7220.61	8750.78	7050.82	7319.14		8829.34	0.798993	0.0483501	0.823377	0.226779	TRUE
P15104	P15104	Glutamine synthetase [OS=Homo sapiens]	GLUL	glutamate-ammonia ligase(GLUL)	0	68.513	39	11	34	11	1	373	42	6.89	113.97	11	0	5568.1	4436.3	5498.2	5832.4	4638.7	5214.6	5568.1	4327.5	5475.99	5459.02	4483.19	5381.08		5513.56	0.799002	0.0390084	0.984579	0.977931	TRUE
Q96ME7	Q96ME7	Zinc finger protein 512 [OS=Homo sapiens]	ZNF512	zinc finger protein 512(ZNF512)	0	19.369	9	3	5	3	1	567	64.6	9.76	23.34	3	0	255.8	165.9	161.4	297.7	215.8	182.1	255.8	161.831	160.748	278.642	208.565	187.914		267.221	0.693053	0.00271516	0.652385	0.0216907	TRUE
P06737-1	P06737	Glycogen phosphorylase, liver form [OS=Homo sapiens]	PYGL	phosphorylase, glycogen, liver(PYGL)	0	204.522	45	34	114	27	1	847	97.1	7.17	341.59	34	8	12076.6	11505.5	7530.2	12124.1	11640.1	7590.6	12076.6	11223.3	7499.78	11347.9	11249.9	7832.94		11712.3	0.959387	0.646147	0.654558	0.00667541	TRUE
P29372-2	P29372	Isoform 2 of DNA-3-methyladenine glycosylase [OS=Homo sapiens]	MPG	N-methylpurine DNA glycosylase(MPG)	0	62.151	43	10	18	10	1	293	32.2	9.44	86.18	10	0	3388.7	2739.5	2498	3517.5	2767.8	2428.1	3388.7	2672.31	2487.91	3292.32	2675.01	2505.62		3340.51	0.800376	0.0497684	0.74742	0.0534709	TRUE
Q5U649	Q5U649	Uncharacterized protein C12orf60 [OS=Homo sapiens]	C12orf60	chromosome 12 open reading frame 60(C12orf60)	0.001	8.857	4	1	3	1	1	245	27.6	7.96	8.48	1	0	80	72.3	69.9	88.4	61.8	86.7	80	70.5268	69.6176	82.7408	59.7282	89.468		81.3704	0.800383	0.08212	0.97754	0.677533	TRUE
O76041-2	O76041	Isoform 2 of Nebulette [OS=Homo sapiens]	NEBL	nebulette(NEBL)	0	60.377	52	13	23	12	1	270	31.2	8.31	71.83	13	0	1987.4	1630.1	1334.2	2225.4	1597.5	1295.6	1987.4	1590.12	1328.81	2082.93	1543.94	1336.96		2035.17	0.769977	0.0399767	0.654927	0.0187391	TRUE
O95239-1	O95239	Chromosome-associated kinesin KIF4A [OS=Homo sapiens]	KIF4A	kinesin family member 4A(KIF4A)	0	373.259	55	56	142	55	1	1232	139.8	6.27	516.9	56	1	19724.8	16148.3	15773.2	21351.2	16592.3	15079.6	19724.8	15752.3	15709.5	19984.3	16036	15561		19854.6	0.800529	0.020658	0.787489	0.110408	TRUE
Q4G0A6	Q4G0A6	Probable ubiquitin carboxyl-terminal hydrolase MINDY-4 [OS=Homo sapiens]	FAM188B	family with sequence similarity 188 member B(FAM188B)	0	74.827	28	15	22	15	1	757	84.3	6.9	77	15	0	1806.7	1539.7	1657.8	2132.3	1596.5	1685.7	1806.7	1501.94	1651.1	1995.79	1542.98	1739.52		1901.25	0.800768	0.0740741	0.891683	0.438411	TRUE
Q9Y508-1	Q9Y508	E3 ubiquitin-protein ligase RNF114 [OS=Homo sapiens]	RNF114	ring finger protein 114(RNF114)	0	90.662	57	11	69	11	1	228	25.7	7.25	194.35	11	0	4705.5	3907.5	4000.5	5205.2	3993.5	3939.6	4705.5	3811.67	3984.34	4871.97	3859.62	4065.38		4788.74	0.800972	0.0661853	0.840484	0.236835	TRUE
Q8TF01	Q8TF01	Arginine/serine-rich protein PNISR [OS=Homo sapiens]	PNISR	PNN interacting serine and arginine rich protein(PNISR)	0	51.516	10	12	25	12	1	805	92.5	10.02	69.36	12	0	3803.7	3122	3038.1	4073.6	3161.5	2887.7	3803.7	3045.43	3025.83	3812.82	3055.51	2979.89		3808.26	0.801015	0.0268521	0.788513	0.153014	TRUE
Q9Y2I1-1	Q9Y2I1	Nischarin [OS=Homo sapiens]	NISCH	nischarin(NISCH)	0	127.785	22	23	38	23	1	1504	166.5	5.14	147.92	23	0	5422.7	4462.5	4605.6	5750.4	4451.8	4564.4	5422.7	4353.06	4586.99	5382.27	4302.55	4710.12		5402.49	0.801077	0.041177	0.860448	0.317311	TRUE
Q9NRF2	Q9NRF2	SH2B adapter protein 1 [OS=Homo sapiens]	SH2B1	SH2B adaptor protein 1(SH2B1)	0	36.654	13	6	9	6	1	756	79.3	5.38	39.83	6	0	1960.3	1552	1888.7	1947	1570	1766.5	1960.3	1513.94	1881.07	1822.36	1517.37	1822.9		1891.33	0.801369	0.0749238	0.979197	0.847427	TRUE
Q96KB5	Q96KB5	Lymphokine-activated killer T-cell-originated protein kinase [OS=Homo sapiens]	PBK	PDZ binding kinase(PBK)	0	174.987	63	17	77	17	1	322	36.1	5.12	279.14	17	0	10627	8574.9	9296.8	10987.8	8685.5	8800.4	10627	8364.6	9259.24	10284.4	8394.32	9081.36		10455.7	0.801426	0.023564	0.877063	0.411162	TRUE
P49917	P49917	DNA ligase 4 [OS=Homo sapiens]	LIG4	DNA ligase 4(LIG4)	0	33.959	12	8	11	8	1	911	103.9	7.96	37.3	8	0	1232.9	1368.5	839.8	1365.1	1395.9	784.6	1232.9	1334.94	836.407	1277.71	1349.1	809.649		1255.3	1.06908	0.633377	0.65564	0.0257292	FALSE
Q9P016	Q9P016	Thymocyte nuclear protein 1 [OS=Homo sapiens]	THYN1	thymocyte nuclear protein 1(THYN1)	0	63.547	44	11	36	11	1	225	25.7	9.25	106.99	11	0	6338.3	4958.3	4577	6402.9	5235.5	4501.9	6338.3	4836.7	4558.51	5993	5059.98	4645.63		6165.65	0.802566	0.0427953	0.746405	0.0513224	TRUE
Q9UIU6	Q9UIU6	Homeobox protein SIX4 [OS=Homo sapiens]	SIX4	SIX homeobox 4(SIX4)	0	32.72	12	5	10	4	1	781	82.9	5.71	30.84	5	1	731.4	570.8	706	732.8	601.8	685.1	731.4	556.801	703.148	685.888	581.625	706.972		708.644	0.803243	0.100028	0.994943	0.882858	TRUE
Q6P582	Q6P582	Mitotic-spindle organizing protein 2A [OS=Homo sapiens]	MZT2A	mitotic spindle organizing protein 2A(MZT2A)	0	25.621	27	3	9	1	1	158	16.2	9.64	33.73	3	0	380.7	324.8	244.8	413.7	321.8	252.6	380.7	316.834	243.811	387.216	311.012	260.664		383.958	0.817597	0.152758	0.656941	0.0269229	TRUE
Q9H0P0-4	Q9H0P0	Cytosolic 5'-nucleotidase 3A [OS=Homo sapiens]	NT5C3A	5'-nucleotidase, cytosolic IIIA(NT5C3A)	0	101.321	52	16	33	16	1	336	37.9	7.12	110.34	16	0	4393.4	3639.5	3414.3	4537.7	3512.9	3309.7	4393.4	3550.24	3400.51	4247.21	3395.13	3415.37		4320.3	0.803806	0.070085	0.788819	0.106969	TRUE
Q9NYZ3	Q9NYZ3	G2 and S phase-expressed protein 1 [OS=Homo sapiens]	GTSE1	G2 and S-phase expressed 1(GTSE1)	0	113.539	34	18	46	18	1	720	76.6	9.39	164.17	18	0	4676.1	3918.1	3682.4	5288.5	4051.4	3788.1	4676.1	3822.01	3667.52	4949.94	3915.58	3909.04		4813.02	0.803818	0.0701019	0.78709	0.103881	TRUE
Q9BUW7	Q9BUW7	UPF0184 protein C9orf16 [OS=Homo sapiens]	c9orf16	chromosome 9 open reading frame 16(C9orf16)	0.009	4.101	19	1	1	1	1	83	9	4.22	4.23	1	0	29.5	22.8	21.7	21.8	18.5	20.1	29.5	22.2408	21.6123	20.4044	17.8798	20.7417		24.9522	0.803949	0.0875109	0.848704	0.238504	TRUE
Q9ULQ1-3	Q9ULQ1	Isoform 3 of Two pore calcium channel protein 1 [OS=Homo sapiens]	TPCN1	two pore segment channel 1(TPCN1)	0	23.93	9	6	8	6	1	888	101.7	7.15	28.01	6	0	561.6	621.6	361.4	603	613.8	368.7	561.6	606.355	359.94	564.397	593.223	380.471		562.999	1.06535	0.654803	0.65756	0.0260773	FALSE
Q9BVW5	Q9BVW5	TIMELESS-interacting protein [OS=Homo sapiens]	TIPIN	TIMELESS interacting protein(TIPIN)	0	17.635	9	2	16	2	1	301	34.5	4.82	37.79	2	0	564.6	565.9	361.1	593.6	550.5	365.3	564.6	552.021	359.641	555.599	532.045	376.963		560.099	0.967744	0.762945	0.657565	0.0260793	TRUE
Q8TCB7-1	Q8TCB7	Methyltransferase-like protein 6 [OS=Homo sapiens]	METTL6	methyltransferase like 6(METTL6)	0	21.659	15	5	12	5	1	284	33.2	6.19	31.09	5	0	1227.9	1000.4	1062.3	1365.7	1075.7	1054.7	1227.9	975.865	1058.01	1278.27	1039.64	1088.37		1253.09	0.804216	0.0676587	0.856438	0.311488	TRUE
Q5W0Q7	Q5W0Q7	SUMO-specific isopeptidase USPL1 [OS=Homo sapiens]	USPL1	ubiquitin specific peptidase like 1(USPL1)	0.001	9.056	4	3	3	3	1	1092	120.4	6.19	7.57	3	0	78.3	73.9	93.5	104.9	72.3	83.1	78.3	72.0876	93.1223	98.1845	69.8762	85.753		88.2423	0.804398	0.132256	1.01355	0.891807	FALSE
P42704	P42704	Leucine-rich PPR motif-containing protein, mitochondrial [OS=Homo sapiens]	LRPPRC	leucine rich pentatricopeptide repeat containing(LRPPRC)	0	852.324	72	101	521	101	1	1394	157.8	6.13	1762.89	101	0	75933.7	63839.3	61365.7	83257.6	63694.1	59413	75933.7	62273.6	61117.8	77927.6	61558.8	61309.8		76930.7	0.804831	0.0103187	0.795701	0.067963	TRUE
Q9H6L4	Q9H6L4	Armadillo repeat-containing protein 7 [OS=Homo sapiens]	ARMC7	armadillo repeat containing 7(ARMC7)	0.001	7.769	10	2	7	2	1	198	21.9	6.09	17.88	2	0	319.2	265	220.3	365.4	289	209.4	319.2	258.501	219.41	342.008	279.311	216.085		330.604	0.813378	0.143529	0.658636	0.0276534	TRUE
P53350	P53350	Serine/threonine-protein kinase PLK1 [OS=Homo sapiens]	PLK1	polo like kinase 1(PLK1)	0	204.444	53	28	124	28	1	603	68.2	8.91	446.32	28	0	19771	16869.5	13241.8	22504.4	16665.5	13293.7	19771	16455.8	13188.3	21063.7	16106.8	13718.1		20417.4	0.797424	0.00785165	0.65891	0.00122541	TRUE
Q9HAJ7	Q9HAJ7	Histone deacetylase complex subunit SAP30L [OS=Homo sapiens]	SAP30L	SAP30 like(SAP30L)	0.005	5.444	10	2	4	2	1	183	20.9	9.36	5.58	2	0	81.9	84.8	79.1	114.7	72.1	60.7	81.9	82.7203	78.7805	107.357	69.6829	62.6379		94.6286	0.80527	0.133808	0.747229	0.0868801	TRUE
Q5BJF6	Q5BJF6	Outer dense fiber protein 2 [OS=Homo sapiens]	ODF2	outer dense fiber of sperm tails 2(ODF2)	0	67.286	22	16	24	14	1	829	95.3	7.62	71.73	16	0	2656.1	2237.2	1640.1	2512.8	2276.7	1615.7	2656.1	2182.33	1633.47	2351.94	2200.37	1667.28		2504.02	0.875135	0.220565	0.659092	0.0259655	TRUE
Q8WUI4-5	Q8WUI4	Isoform 5 of Histone deacetylase 7 [OS=Homo sapiens]	HDAC7	histone deacetylase 7(HDAC7)	0	87.466	26	18	31	17	1	991	106.7	7.46	117.6	18	0	3603.5	3103.4	3061.1	3897.1	2911.4	2970.3	3603.5	3027.29	3048.73	3647.62	2813.8	3065.13		3625.56	0.805543	0.0303518	0.843162	0.28236	TRUE
Q99741	Q99741	Cell division control protein 6 homolog [OS=Homo sapiens]	CDC6	cell division cycle 6(CDC6)	0	82.697	29	15	27	13	1	560	62.7	9.58	108.67	15	1	4494.5	3805.1	3371.8	4871.9	3707.4	3395.8	4494.5	3711.78	3358.18	4560.01	3583.11	3504.21		4527.26	0.805664	0.0727415	0.757898	0.0616589	TRUE
P54277	P54277	PMS1 protein homolog 1 [OS=Homo sapiens]	PMS1	PMS1 homolog 1, mismatch repair system component(PMS1)	0	57.718	16	11	17	11	1	932	105.8	6.67	57.13	11	0	2981	2428.3	1955.7	3143.8	2397.2	1898.2	2981	2368.75	1947.8	2942.54	2316.83	1958.8		2961.77	0.79101	0.0402735	0.659504	0.00989235	TRUE
P54803	P54803	Galactocerebrosidase [OS=Homo sapiens]	GALC	galactosylceramidase(GALC)	0	26.122	12	7	19	7	1	685	77	6.64	43.54	7	0	1119.2	915.6	1137.2	1227.7	967.4	1054.1	1119.2	893.145	1132.61	1149.11	934.968	1087.75		1134.15	0.805938	0.0699401	0.978863	0.787622	TRUE
P40261	P40261	Nicotinamide N-methyltransferase [OS=Homo sapiens]	NNMT	nicotinamide N-methyltransferase(NNMT)	0	45.265	29	7	10	7	1	264	29.6	5.74	46.63	7	0	1898	1562.8	2367.6	2088.4	1635.7	2281.8	1898	1524.47	2358.04	1954.7	1580.86	2354.65		1926.35	0.806014	0.0817677	1.22321	0.210667	FALSE
P08247	P08247	Synaptophysin [OS=Homo sapiens]	SYP	synaptophysin(SYP)	0	16.694	12	4	7	4	1	313	33.8	4.81	20.08	4	0	778.9	653.3	650.5	847.9	652.2	641.9	778.9	637.278	647.872	793.619	630.335	662.393		786.26	0.806103	0.104942	0.833227	0.276826	TRUE
P07099	P07099	epoxide hydrolase 1 [OS=Homo sapiens]	EPHX1	epoxide hydrolase 1(EPHX1)	0	27.019	18	8	19	8	1	455	52.9	7.25	53.13	8	0	2238.3	1984.4	1606.6	2899.1	2127.8	1819	2238.3	1935.73	1600.11	2713.51	2056.47	1877.07		2475.9	0.806211	0.0592192	0.702205	0.052303	TRUE
Q96M89-1	Q96M89	Coiled-coil domain-containing protein 138 [OS=Homo sapiens]	CCDC138	coiled-coil domain containing 138(CCDC138)	0	56.636	24	12	17	12	1	665	76.2	8.53	67.69	12	0	2157.6	1700.1	1380.3	2233.3	1645.7	1388.2	2157.6	1658.4	1374.72	2090.33	1590.53	1432.52		2123.96	0.764828	0.0358358	0.66085	0.0208185	TRUE
Q9NP73-1	Q9NP73	Putative bifunctional UDP-N-acetylglucosamine transferase and deubiquitinase ALG13 [OS=Homo sapiens]	ALG13	ALG13, UDP-N-acetylglucosaminyltransferase subunit(ALG13)	0	36.239	9	8	16	1	1	1137	126	6.74	41.91	8	7	1421.1	1076.1	1491.6	1278.3	1098.5	1352.1	1421.1	1049.71	1485.57	1196.47	1061.67	1395.27		1308.78	0.80662	0.0591809	1.10058	0.607802	FALSE
Q8TD22	Q8TD22	Sideroflexin-5 [OS=Homo sapiens]	SFXN5	sideroflexin 5(SFXN5)	0	28.368	20	5	13	5	1	340	37.1	9.33	40.56	5	0	536.4	450.6	494.4	585.6	450.5	481.8	536.4	439.549	492.403	548.111	435.397	497.182		542.256	0.806765	0.111107	0.912471	0.504942	TRUE
P52732	P52732	Kinesin-like protein KIF11 [OS=Homo sapiens]	KIF11	kinesin family member 11(KIF11)	0	373.025	53	56	182	55	1	1056	119.1	5.64	600.59	56	0	24748.1	20040	20744.9	25623.3	20481.4	19958	24748.1	19548.5	20661.1	23982.9	19794.8	20595.2		24365.5	0.807355	0.0113049	0.846612	0.193137	TRUE
Q9Y485	Q9Y485	DmX-like protein 1 [OS=Homo sapiens]	DMXL1	Dmx like 1(DMXL1)	0	269.859	22	49	85	48	1	3027	337.6	6.34	295.44	49	1	8618.2	7345.5	8426.2	9601.5	7302	8273.8	8618.2	7165.35	8392.16	8986.83	7057.2	8537.95		8802.52	0.807869	0.0597572	0.961663	0.877612	TRUE
P63165-1	P63165	Small ubiquitin-related modifier 1 [OS=Homo sapiens]	SUMO1	small ubiquitin-like modifier 1(SUMO1)	0	21.915	42	5	25	5	1	101	11.6	5.52	53.84	5	0	3028.8	2588.9	2457.6	3449.8	2618.2	2403.1	3028.8	2525.41	2447.67	3228.95	2530.43	2479.82		3128.88	0.807931	0.0587362	0.787422	0.101831	TRUE
Q8IUD2-1	Q8IUD2	ELKS/Rab6-interacting/CAST family member 1 [OS=Homo sapiens]	ERC1	ELKS/RAB6-interacting/CAST family member 1(ERC1)	0	138.694	23	25	51	25	1	1116	128	5.97	174.21	25	0	4665.7	3975.3	4785.8	5150.4	3919.7	4583.5	4665.7	3877.8	4766.47	4820.68	3788.29	4729.83		4743.19	0.808116	0.0763747	1.00105	0.92001	FALSE
Q09019	Q09019	Dystrophia myotonica WD repeat-containing protein [OS=Homo sapiens]	DMWD	dystrophia myotonica, WD repeat containing(DMWD)	0.001	12.51	9	4	4	4	1	674	70.4	7.24	9.62	4	0	378.8	300.5	309.5	368.2	301.6	295.4	378.8	293.13	308.25	344.629	291.489	304.831		361.714	0.808123	0.132638	0.847465	0.300155	TRUE
P30046	P30046	D-dopachrome decarboxylase [OS=Homo sapiens]	DDT	D-dopachrome tautomerase(DDT)	0	49.667	64	7	26	7	1	118	12.7	7.3	74.81	7	0	3006.4	2371.8	2434.2	2936.6	2419.6	2450.9	3006.4	2313.63	2424.37	2748.6	2338.48	2529.15		2877.5	0.80836	0.0592827	0.860731	0.273381	TRUE
O95347-1	O95347	structural maintenance of chromosomes protein 2 [OS=Homo sapiens]	SMC2	structural maintenance of chromosomes 2(SMC2)	0	465.091	57	67	216	67	1	1197	135.6	8.43	766.5	67	0	38592.3	31791.5	36142.2	40603.1	32012	34587.5	38592.3	31011.8	35996.2	38003.8	30938.8	35691.7		38298	0.808796	0.0119046	0.935922	0.702233	TRUE
O14662-4	O14662	Isoform D of Syntaxin-16 [OS=Homo sapiens]	STX16	syntaxin 16(STX16)	0	34.413	25	5	9	1	1	308	35.3	5.73	35.95	5	0	51.3	60.9	32.6	53.4	56.9	33.4	51.3	59.4064	32.4683	49.9814	54.9924	34.4663		50.6407	1.12951	0.513389	0.660878	0.0219668	FALSE
Q71DI3	Q71DI3	histone H3.2 [OS=Homo sapiens]	HIST2H3C	histone cluster 2 H3 family member c(HIST2H3C)	0	48.172	54	7	65	1	1	136	15.4	11.27	175.36	7	0	95	75.4	85.3	87.7	72.2	96.3	95	73.5508	84.9554	82.0856	69.7795	99.3745		88.5428	0.809384	0.141314	1.04091	0.985386	FALSE
Q9UMR5-3	Q9UMR5	Isoform 3 of Lysosomal thioesterase PPT2 [OS=Homo sapiens]	PPT2	palmitoyl-protein thioesterase 2(PPT2)	0	44.111	28	5	30	5	1	308	34.8	6.46	99.16	5	0	3500.3	2813.2	3933.5	3672.3	2970.6	3813.8	3500.3	2744.21	3917.61	3437.21	2871.01	3935.56		3468.75	0.8094	0.0336353	1.13199	0.49477	FALSE
Q8TDR2	Q8TDR2	Serine/threonine-protein kinase 35 [OS=Homo sapiens]	STK35	serine/threonine kinase 35(STK35)	0	16.215	9	4	9	2	1	534	58	9.74	16.94	4	0	393.1	269.8	278.9	226.4	234.5	248.5	393.1	263.183	277.773	211.906	226.638	256.434		302.503	0.809614	0.0635583	0.882977	0.355293	TRUE
Q9Y6E2	Q9Y6E2	Basic leucine zipper and W2 domain-containing protein 2 [OS=Homo sapiens]	BZW2	basic leucine zipper and W2 domains 2(BZW2)	0	189.08	59	32	121	28	1	419	48.1	6.68	369.98	32	4	19534.8	15827.8	14958.2	20676.6	16606.2	14150.6	19534.8	15439.6	14897.8	19352.9	16049.5	14602.4		19443.9	0.809744	0.0274903	0.758598	0.0620508	TRUE
Q9NUI1	Q9NUI1	Peroxisomal 2,4-dienoyl-CoA reductase [OS=Homo sapiens]	DECR2	2,4-dienoyl-CoA reductase 2, peroxisomal(DECR2)	0	23.346	23	6	18	6	1	292	30.8	9.22	53.95	6	0	838	739	815.2	995.2	736.8	797.4	838	720.876	811.907	931.489	712.099	822.858		884.745	0.809824	0.111618	0.923862	0.575089	TRUE
Q15054	Q15054	DNA polymerase delta subunit 3 [OS=Homo sapiens]	POLD3	DNA polymerase delta 3, accessory subunit(POLD3)	0	49.247	24	10	27	10	1	466	51.4	9.35	81.08	10	0	2333.9	1897.3	1581.3	2362.8	1895.9	1618.2	2333.9	1850.77	1574.91	2211.54	1832.34	1669.86		2272.72	0.810287	0.0646835	0.713853	0.0624149	TRUE
Q8NG08	Q8NG08	DNA helicase B [OS=Homo sapiens]	HELB	DNA helicase B(HELB)	0	13.598	3	4	6	4	1	1087	123.2	5.87	15.13	4	0	746.6	620.7	554.5	781.2	613	525.1	746.6	605.477	552.26	731.189	592.449	541.864		738.895	0.810621	0.11309	0.740379	0.103685	TRUE
Q9Y592	Q9Y592	Centrosomal protein of 83 kDa [OS=Homo sapiens]	cep83	centrosomal protein 83(CEP83)	0	19.231	6	4	4	4	1	693	82	6.28	18.32	4	0	351.4	293.8	272.9	385.2	301	275.3	351.4	286.594	271.798	360.54	290.909	284.089		355.97	0.811168	0.138869	0.780805	0.147689	TRUE
Q9UBZ4	Q9UBZ4	DNA-(apurinic or apyrimidinic site) lyase 2 [OS=Homo sapiens]	APEX2	apurinic/apyrimidinic endodeoxyribonuclease 2(APEX2)	0	52.791	26	9	20	9	1	518	57.4	8.29	71.84	9	0	1416.3	1107.5	1008.7	1405.3	1175.1	976.9	1416.3	1080.34	1004.63	1315.34	1135.71	1008.09		1365.82	0.811251	0.0653961	0.736816	0.0583897	TRUE
Q9BTC8	Q9BTC8	Metastasis-associated protein MTA3 [OS=Homo sapiens]	mta3	metastasis associated 1 family member 3(MTA3)	0	145.407	43	23	89	15	1	594	67.5	8.57	267.27	23	0	3612.5	2998.6	2821.8	3861.7	3043.6	2777	3612.5	2925.06	2810.4	3614.48	2941.56	2865.66		3613.49	0.811767	0.035797	0.785398	0.147299	TRUE
P21281	P21281	V-type proton ATPase subunit B, brain isoform [OS=Homo sapiens]	ATP6V1B2	ATPase H+ transporting V1 subunit B2(ATP6V1B2)	0	294.026	80	28	173	28	1	511	56.5	5.81	654.55	28	0	18744.9	15517.8	15717.7	19852.7	15692.4	15035.1	18744.9	15137.2	15654.2	18581.8	15166.3	15515.1		18663.3	0.811847	0.029298	0.835041	0.249046	TRUE
Q711Q0-1	Q711Q0	Uncharacterized protein C10orf71 [OS=Homo sapiens]	C10orf71	chromosome 10 open reading frame 71(C10orf71)	0	32.498	9	8	14	8	1	1435	156.4	6.38	40.15	8	0	961.8	795	974.2	1018	806.1	934.8	961.8	775.502	970.264	952.83	779.076	964.644		957.315	0.811947	0.115575	1.01059	0.955044	FALSE
Q6UWB1	Q6UWB1	Interleukin-27 receptor subunit alpha [OS=Homo sapiens]	IL27RA	interleukin 27 receptor subunit alpha(IL27RA)	0	32.022	11	5	9	5	1	636	69.4	5.71	31.47	5	0	444.9	381.1	380.1	470.6	359.4	400.4	444.9	371.753	378.564	440.473	347.351	413.183		442.687	0.812205	0.14104	0.894253	0.454957	TRUE
Q96L14	Q96L14	Cep170-like protein [OS=Homo sapiens]	CEP170P1	centrosomal protein 170 pseudogene 1(CEP170P1)	0	42.018	37	7	11	1	1	293	32.6	5.69	43.13	7	0	29.1	29.5	21.5	33.3	24.8	17.9	29.1	28.7765	21.4131	31.1682	23.9686	18.4715		30.1341	0.875173	0.265818	0.661785	0.0222797	TRUE
Q32P44	Q32P44	Echinoderm microtubule-associated protein-like 3 [OS=Homo sapiens]	EML3	echinoderm microtubule associated protein like 3(EML3)	0	128.591	33	19	40	4	1	896	95.1	7.12	154.48	19	15	4294.5	3537.9	3379.8	4523.7	3596.9	3458.3	4294.5	3451.13	3366.15	4234.1	3476.31	3568.71		4264.3	0.812261	0.0828499	0.813129	0.158513	TRUE
Q96JA3	Q96JA3	pleckstrin homology domain-containing family A member 8 [OS=Homo sapiens]	PLEKHA8	pleckstrin homology domain containing A8(PLEKHA8)	0	15.076	13	6	7	6	1	519	58.2	5.11	12.58	6	0	500.7	394.1	551.2	506.2	421.3	510.2	500.7	384.435	548.973	473.794	407.176	526.489		487.247	0.81233	0.12148	1.10361	0.638421	FALSE
Q68DC2-4	Q68DC2	Isoform 3 of Ankyrin repeat and SAM domain-containing protein 6 [OS=Homo sapiens]	ANKS6	ankyrin repeat and sterile alpha motif domain containing 6(ANKS6)	0	22.763	10	6	7	6	1	872	92.3	7.39	15.81	6	0	211.3	176.6	167.3	234	183.5	167.7	211.3	172.269	166.624	219.02	177.348	173.054		215.16	0.812459	0.0676441	0.789362	0.138576	TRUE
Q9H7U1-3	Q9H7U1	Isoform 3 of Serine-rich coiled-coil domain-containing protein 2 [OS=Homo sapiens]	CCSER2	coiled-coil serine rich protein 2(CCSER2)	0	23.867	8	6	10	6	1	1047	116.8	7.09	24.68	6	0	784.1	646.6	929.1	842.2	669.2	828.5	784.1	630.742	925.347	788.284	646.765	854.951		786.192	0.812465	0.116557	1.13223	0.576725	FALSE
Q96NY9	Q96NY9	crossover junction endonuclease MUS81 [OS=Homo sapiens]	MUS81	MUS81 structure-specific endonuclease subunit(MUS81)	0	35.478	19	8	14	8	1	551	61.1	9.73	38.77	8	0	1632.5	1322	1419.1	1757.6	1421	1402.5	1632.5	1289.58	1413.37	1645.08	1373.36	1447.28		1638.79	0.812471	0.0671188	0.872791	0.347822	TRUE
O95857	O95857	Tetraspanin-13 [OS=Homo sapiens]	TSPAN13	tetraspanin 13(TSPAN13)	0	16.352	25	4	7	3	1	204	22.1	7.93	21.33	4	1	384.1	335.9	382.2	443.9	333.2	409.2	384.1	327.662	380.656	415.482	322.03	422.264		399.791	0.812539	0.141744	1.00417	0.945479	FALSE
Q9NRK6	Q9NRK6	ATP-binding cassette sub-family B member 10, mitochondrial [OS=Homo sapiens]	abcb10	ATP binding cassette subfamily B member 10(ABCB10)	0	125.162	36	21	82	20	1	738	79.1	9.85	234.06	21	1	7165.1	6171.7	4740.9	7798.1	6251.9	4702.6	7165.1	6020.34	4721.75	7298.88	6042.31	4852.73		7231.99	0.833978	0.106782	0.661953	0.0146925	TRUE
Q15633	Q15633	RISC-loading complex subunit TARBP2 [OS=Homo sapiens]	TARBP2	TARBP2, RISC loading complex RNA binding subunit(TARBP2)	0	65.588	27	10	39	10	1	366	39	6.54	128.31	10	0	4171.7	3549.4	3307.1	4524.8	3488.9	3256.6	4171.7	3462.35	3293.74	4235.13	3371.94	3360.57		4203.42	0.812944	0.036916	0.791536	0.158721	TRUE
P28340	P28340	DNA polymerase delta catalytic subunit [OS=Homo sapiens]	POLD1	DNA polymerase delta 1, catalytic subunit(POLD1)	0	280.863	62	50	116	49	1	1107	123.6	7.03	387.71	50	0	16789.8	12028.6	10761.4	17016.8	12223.7	10627.5	16789.8	11733.6	10717.9	15927.4	11813.9	10966.8		16358.6	0.719728	0.00105295	0.662792	0.0057827	TRUE
Q5W0B1	Q5W0B1	RING finger protein 219 [OS=Homo sapiens]	rnf219	ring finger protein 219(RNF219)	0	56.023	20	10	19	10	1	726	81.1	5.72	55.49	10	0	1193.8	988.2	922.2	1211.4	962.1	893.6	1193.8	963.964	918.475	1133.85	929.846	922.129		1163.82	0.813615	0.080893	0.790757	0.158371	TRUE
O96017-9	O96017	Isoform 9 of Serine/threonine-protein kinase Chk2 [OS=Homo sapiens]	CHEK2	checkpoint kinase 2(CHEK2)	0	116.6	40	21	42	21	1	586	65.4	6.15	163.12	21	0	5833.3	4810.6	3808.9	5942.2	4682	3643.8	5833.3	4692.62	3793.51	5561.79	4525.04	3760.13		5697.55	0.808915	0.0503113	0.662886	0.00820296	TRUE
Q8IY95	Q8IY95	transmembrane protein 192 [OS=Homo sapiens]	TMEM192	transmembrane protein 192(TMEM192)	0	41.365	25	7	13	7	1	271	30.9	7.99	46.35	7	0	968.1	816.5	1045.7	1005.1	783.9	981.7	968.1	796.475	1041.48	940.755	757.62	1013.04		954.428	0.81415	0.119797	1.07631	0.779986	FALSE
Q56P03	Q56P03	e2f-associated phosphoprotein [OS=Homo sapiens]	EAPP	E2F associated phosphoprotein(EAPP)	0	30.329	22	5	7	5	1	285	32.7	5.12	27.56	5	0	1592.5	1329.5	1779.9	1695.1	1337	1681.6	1592.5	1296.89	1772.71	1586.58	1292.18	1735.29		1589.54	0.814408	0.0699334	1.10346	0.59684	FALSE
Q9UJT0	Q9UJT0	Tubulin epsilon chain [OS=Homo sapiens]	TUBE1	tubulin epsilon 1(TUBE1)	0	16.15	8	3	10	3	1	475	52.9	6.64	25	3	0	365.9	314.8	225	340.8	350.8	222.8	365.9	307.079	224.091	318.983	339.04	229.913		342.441	0.943401	0.653945	0.662893	0.0295643	TRUE
Q96DF8	Q96DF8	Protein DGCR14 [OS=Homo sapiens]	DGCR14	DiGeorge syndrome critical region gene 14(DGCR14)	0	135.057	48	16	57	16	1	476	52.5	7.56	198.63	16	0	4926.2	4015.2	3216.1	5139.8	4154.2	3155.9	4926.2	3916.73	3203.11	4810.76	4014.93	3256.65		4868.48	0.814593	0.0866849	0.663427	0.00797248	TRUE
Q9P2D0	Q9P2D0	inhibitor of Bruton tyrosine kinase [OS=Homo sapiens]	IBTK	inhibitor of Bruton tyrosine kinase(IBTK)	0	88.103	17	18	32	18	1	1353	150.4	7.71	95.33	18	0	3419.7	3016.5	2199.5	3310	3189.9	2071	3419.7	2942.52	2190.61	3098.1	3082.96	2137.12		3258.9	0.924465	0.43365	0.663987	0.0108807	TRUE
Q8WVM8	Q8WVM8	Sec1 family domain-containing protein 1 [OS=Homo sapiens]	SCFD1	sec1 family domain containing 1(SCFD1)	0	228.078	47	23	82	23	1	642	72.3	6.27	321.48	23	0	15331.3	13097.9	12363.1	16741.7	12922.1	12295.9	15331.3	12776.7	12313.2	15669.9	12488.9	12688.5		15500.6	0.814986	0.0321863	0.806472	0.155829	TRUE
O60674	O60674	Tyrosine-protein kinase JAK2 [OS=Homo sapiens]	JAK2	Janus kinase 2(JAK2)	0	36.828	10	8	14	8	1	1132	130.6	7.21	49.07	8	0	1251.1	998.1	954.4	1291.4	1067.1	884.5	1251.1	973.621	950.544	1208.73	1031.33	912.738		1229.91	0.815076	0.083128	0.757485	0.106871	TRUE
Q9Y3S2	Q9Y3S2	zinc finger protein 330 [OS=Homo sapiens]	ZNF330	zinc finger protein 330(ZNF330)	0	60.114	51	14	17	14	1	320	36.2	6.16	62.56	14	0	3116.7	2748.5	3185.8	3769.4	2829.8	2926.3	3116.7	2681.09	3172.93	3528.09	2734.93	3019.72		3322.4	0.815078	0.0684158	0.931956	0.56871	TRUE
P17026	P17026	zinc finger protein 22 [OS=Homo sapiens]	ZNF22	zinc finger protein 22(ZNF22)	0	19.411	27	5	6	3	1	224	25.9	10.04	21	5	1	108.9	102	106	140.1	99.5	87.3	108.9	99.4984	105.572	131.131	96.1643	90.0871		120.016	0.815156	0.152385	0.81514	0.190131	TRUE
P61244	P61244	Protein max [OS=Homo sapiens]	MAX	MYC associated factor X(MAX)	0	24.943	31	4	7	4	1	160	18.3	6.3	32.24	4	0	1206.1	968.9	907.3	1247.1	1024.1	848.1	1206.1	945.137	903.635	1167.26	989.767	875.176		1186.68	0.815259	0.0834102	0.74949	0.0967286	TRUE
Q7KZN9	Q7KZN9	Cytochrome c oxidase assembly protein COX15 homolog [OS=Homo sapiens]	Cox15	COX15, cytochrome c oxidase assembly homolog(COX15)	0	30.322	15	5	12	5	1	410	46	9.82	37.76	5	0	1373.4	1176.5	1173.2	1523.2	1173.7	1213	1373.4	1147.65	1168.46	1425.69	1134.35	1251.73		1399.54	0.815265	0.0712085	0.864634	0.319227	TRUE
P41208	P41208	centrin-2 [OS=Homo sapiens]	cetn2	centrin 2(CETN2)	0	54.209	65	8	24	8	1	172	19.7	5	74.79	8	0	2940.4	2305.3	2604.8	2958.5	2489.5	2605.5	2940.4	2248.76	2594.28	2769.1	2406.04	2688.68		2854.75	0.815273	0.0686966	0.925293	0.535847	TRUE
O75419-3	O75419	Isoform 3 of Cell division control protein 45 homolog [OS=Homo sapiens]	CDC45	cell division cycle 45(CDC45)	0	63.097	25	14	28	14	1	598	68.7	5.6	79.6	14	0	4262.7	3694	3471.5	5012.6	3825.4	3398.1	4262.7	3603.4	3457.48	4691.7	3697.15	3506.59		4477.2	0.815304	0.087882	0.777725	0.0883639	TRUE
Q9UII6-4	Q9UII6	Isoform 4 of Dual specificity protein phosphatase 13 isoform B [OS=Homo sapiens]	DUSP13	dual specificity phosphatase 13(DUSP13)	0.008	4.441	8	2	2	2	1	248	27.5	7.01	2.83	2	0	197.6	167.1	249.7	223.3	174.7	250.4	197.6	163.002	248.691	209.005	168.843	258.394		203.302	0.816137	0.0732446	1.24712	0.285267	FALSE
Q9NVW2	Q9NVW2	E3 ubiquitin-protein ligase RLIM [OS=Homo sapiens]	RLIM	ring finger protein, LIM domain interacting(RLIM)	0	22.753	8	5	6	5	1	624	68.5	7.56	22.99	5	0	664.7	561.7	553.8	682.7	534.1	517.2	664.7	547.924	551.563	638.995	516.194	533.712		651.847	0.816233	0.129197	0.832461	0.247741	TRUE
O75417	O75417	DNA polymerase theta [OS=Homo sapiens]	POLQ	DNA polymerase theta(POLQ)	0	14.325	2	5	5	5	1	2590	289.4	7.36	10.16	5	0	98.9	98.1	65.2	112.5	91.9	68.5	98.9	95.6941	64.9366	105.298	88.8191	70.6869		102.099	0.903599	0.41112	0.664177	0.027553	TRUE
Q9BSV6	Q9BSV6	tRNA-splicing endonuclease subunit sen34 [OS=Homo sapiens]	TSEN34	tRNA splicing endonuclease subunit 34(TSEN34)	0	58.134	40	9	19	9	1	310	33.6	8.43	63.23	9	0	1754.7	1410.5	1347.2	1759.5	1449.9	1312.4	1754.7	1375.91	1341.76	1646.86	1401.29	1354.3		1700.78	0.816449	0.0989927	0.792594	0.151459	TRUE
Q96EA4	Q96EA4	protein Spindly [OS=Homo sapiens]	SPDL1	spindle apparatus coiled-coil protein 1(SPDL1)	0	106.763	32	17	36	17	1	605	70.1	5.47	127.2	17	0	5906.5	4978	4524	6423.4	5048.2	4441.5	5906.5	4855.91	4505.72	6012.19	4878.96	4583.3		5959.34	0.816774	0.0611183	0.762586	0.0696539	TRUE
P50748	P50748	Kinetochore-associated protein 1 [OS=Homo sapiens]	KNTC1	kinetochore associated 1(KNTC1)	0	247.578	27	53	115	52	1	2209	250.6	5.97	332.92	53	1	20351.9	14592.5	13327	21949.8	14380.6	13482.1	20351.9	14234.6	13273.2	20544.6	13898.5	13912.5		20448.3	0.68791	5.35658e-05	0.664743	0.00150938	TRUE
O15270	O15270	Serine palmitoyltransferase 2 [OS=Homo sapiens]	SPTLC2	serine palmitoyltransferase long chain base subunit 2(SPTLC2)	0	84.344	35	16	35	16	1	562	62.9	7.78	119.64	16	0	4122.5	3323	3462.6	4500.1	3692.4	3415.2	4122.5	3241.5	3448.61	4212.01	3568.61	3524.23		4167.26	0.817098	0.0411041	0.836623	0.263831	TRUE
Q8N111	Q8N111	Cell cycle exit and neuronal differentiation protein 1 [OS=Homo sapiens]	CEND1	cell cycle exit and neuronal differentiation 1(CEND1)	0.001	9.514	29	2	3	2	1	149	14.9	9.2	10.62	2	0	60.9	47.6	88	65.9	55.6	88.4	60.9	46.4326	87.6445	61.6812	53.736	91.2222		61.2906	0.817161	0.110014	1.45917	0.0729141	FALSE
Q9UI12-1	Q9UI12	V-type proton ATPase subunit H [OS=Homo sapiens]	ATP6V1H	ATPase H+ transporting V1 subunit H(ATP6V1H)	0	187.749	52	18	75	18	1	483	55.8	6.48	308.01	18	0	8261.3	6716.2	7223.8	8442	6887.7	6743.4	8261.3	6551.48	7194.62	7901.56	6656.79	6958.69		8081.43	0.817199	0.0740699	0.875668	0.418012	TRUE
Q9UKA9-3	Q9UKA9	Isoform 3 of Polypyrimidine tract-binding protein 2 [OS=Homo sapiens]	PTBP2	polypyrimidine tract binding protein 2(PTBP2)	0	70.216	30	10	31	9	1	537	58	8.81	109.29	10	0	2051.2	1771.7	1606.7	2409.3	1853.7	1530.9	2051.2	1728.25	1600.21	2255.06	1791.56	1579.78		2153.13	0.817369	0.0751634	0.738456	0.0891174	TRUE
Q96Q11-1	Q96Q11	CCA tRNA nucleotidyltransferase 1, mitochondrial [OS=Homo sapiens]	TRNT1	tRNA nucleotidyl transferase 1(TRNT1)	0	106.567	45	15	63	15	1	434	50.1	8.1	214.77	15	0	8084.7	6128.8	5247.4	8434.7	6261.9	5230.9	8084.7	5978.49	5226.2	7894.73	6051.97	5397.9		7989.71	0.752872	0.0142544	0.664861	0.0156193	TRUE
Q9HCJ3	Q9HCJ3	Ribonucleoprotein PTB-binding 2 [OS=Homo sapiens]	RAVER2	ribonucleoprotein, PTB binding 2(RAVER2)	0	26.71	12	6	10	6	1	691	74.3	7.47	33.41	6	0	1141.4	938.1	977.1	1151.9	930.8	937.6	1141.4	915.093	973.153	1078.16	899.595	967.534		1109.78	0.81759	0.087089	0.874357	0.366315	TRUE
P61024	P61024	cyclin-dependent kinases regulatory subunit 1 [OS=Homo sapiens]	CKS1B	CDC28 protein kinase regulatory subunit 1B(CKS1B)	0	30.532	73	5	22	4	1	79	9.7	8.94	61.21	5	0	2297.5	2018.5	1633.6	2715.9	1993.6	1544.2	2297.5	1969	1627	2542.03	1926.77	1593.5		2419.77	0.804987	0.0576555	0.665457	0.0289261	TRUE
Q05519	Q05519	serine/arginine-rich splicing factor 11 [OS=Homo sapiens]	SRSF11	serine and arginine rich splicing factor 11(SRSF11)	0	79.16	25	11	51	11	1	484	53.5	10.52	149.37	11	0	4841.4	4041.7	3873.3	5201.7	4135.3	3644.7	4841.4	3942.58	3857.65	4868.7	3996.67	3761.06		4855.05	0.817627	0.091888	0.784618	0.0995877	TRUE
O95260-2	O95260	Isoform ATE1-2 of Arginyl-tRNA--protein transferase 1 [OS=Homo sapiens]	ATE1	arginyltransferase 1(ATE1)	0	79.372	40	16	22	1	1	518	59	7.02	75.69	16	0	64.9	55.5	57.2	67.2	52.1	52.5	64.9	54.1388	56.9689	62.898	50.3534	54.1761		63.899	0.817636	0.1109	0.869693	0.29168	TRUE
P78406	P78406	mRNA export factor [OS=Homo sapiens]	RAE1	ribonucleic acid export 1(RAE1)	0	215.837	57	17	225	17	1	368	40.9	7.83	746.08	17	0	20285.6	16820.4	18522.1	20744.4	16636.8	18739.6	20285.6	16407.9	18447.3	19416.4	16079.1	19337.9		19851	0.81827	0.0354658	0.95172	0.948976	TRUE
Q96IU4	Q96IU4	Protein ABHD14B [OS=Homo sapiens]	ABHD14B	abhydrolase domain containing 14B(ABHD14B)	0	68.039	52	7	46	7	1	210	22.3	6.4	160.45	7	0	4569.5	3819.8	4807.3	5020.3	3992.4	4947.4	4569.5	3726.12	4787.88	4698.91	3858.56	5105.35		4634.21	0.818336	0.0931386	1.06741	0.639459	FALSE
P05161	P05161	Ubiquitin-like protein ISG15 [OS=Homo sapiens]	ISG15	ISG15 ubiquitin-like modifier(ISG15)	0	18.15	25	4	13	4	1	165	17.9	7.44	33.96	4	0	716.8	614.1	711.3	806.8	626.7	730.4	716.8	599.039	708.427	755.15	605.69	753.719		735.975	0.818458	0.1284	0.993339	0.875502	TRUE
Q8N567	Q8N567	Zinc finger CCHC domain-containing protein 9 [OS=Homo sapiens]	ZCCHC9	zinc finger CCHC-type containing 9(ZCCHC9)	0	45.229	48	8	25	8	1	271	30.5	9.17	74.04	8	0	1481.1	1333.6	985	1502.3	1470.7	911.9	1481.1	1300.89	981.021	1406.13	1421.4	941.013		1443.61	0.942873	0.559659	0.665703	0.0167723	TRUE
Q9ULX3	Q9ULX3	RNA-binding protein NOB1 [OS=Homo sapiens]	NOB1	NIN1/PSMD8 binding protein 1 homolog(NOB1)	0	96.33	43	17	51	17	1	412	46.6	7.18	170.39	17	0	5469.2	4935.1	5284.4	6342.7	4678.2	4989.4	5469.2	4814.07	5263.05	5936.65	4521.36	5148.69		5702.93	0.818477	0.0636975	0.912842	0.572677	TRUE
O75461-1	O75461	transcription factor E2F6 [OS=Homo sapiens]	E2F6	E2F transcription factor 6(E2F6)	0	12.933	11	3	7	3	1	281	31.8	5.5	17.4	3	0	326.8	340.1	221.4	372.2	282.3	222.4	326.8	331.759	220.506	348.372	272.836	229.5		337.586	0.895467	0.410915	0.666505	0.0312735	TRUE
P52824	P52824	Diacylglycerol kinase theta [OS=Homo sapiens]	DGKQ	diacylglycerol kinase theta(DGKQ)	0	21.599	6	4	7	4	1	942	101.1	7.49	25	4	0	211.6	187.4	205.7	223.7	167.6	202.9	211.6	182.804	204.869	209.379	161.981	209.378		210.49	0.819008	0.0778754	0.984008	0.746295	TRUE
P51965-1	P51965	Ubiquitin-conjugating enzyme E2 E1 [OS=Homo sapiens]	UBE2E1	ubiquitin conjugating enzyme E2 E1(UBE2E1)	0	50.69	42	6	33	3	1	193	21.4	8.53	119.94	6	0	4228.2	3063.2	3480.4	4076.1	3724.5	3350.6	4228.2	2988.07	3466.34	3815.16	3599.64	3457.57		4021.68	0.819025	0.0431795	0.860824	0.33673	TRUE
Q96BU1-1	Q96BU1	S100P-binding protein [OS=Homo sapiens]	S100PBP	S100P binding protein(S100PBP)	0	33.799	25	7	10	7	1	408	45.6	5.17	33.83	7	0	1126.1	895	938.6	1167.5	977.9	893.3	1126.1	873.05	934.808	1092.76	945.116	921.819		1109.43	0.819415	0.0900591	0.836749	0.257822	TRUE
P08651	P08651	Nuclear factor 1 C-type [OS=Homo sapiens]	nfic	nuclear factor I C(NFIC)	0	59.786	26	10	34	10	1	508	55.6	8.38	95.6	10	0	2473.5	1982.1	3145.1	2529.4	2105	2942.4	2473.5	1933.49	3132.39	2367.47	2034.43	3036.34		2420.49	0.819653	0.0788257	1.27428	0.111003	FALSE
Q9NQC8-2	Q9NQC8	Isoform 2 of Intraflagellar transport protein 46 homolog [OS=Homo sapiens]	IFT46	intraflagellar transport 46(IFT46)	0.001	9.517	11	3	4	3	1	355	40	4.82	9.46	3	0	12.7	10.2	13.6	15.9	13.1	11.4	12.7	9.94984	13.5451	14.8821	12.6608	11.764		13.7911	0.819758	0.114933	0.917588	0.440804	TRUE
Q9UM54-2	Q9UM54	Isoform 2 of Unconventional myosin-VI [OS=Homo sapiens]	MYO6	myosin VI(MYO6)	0	309.081	45	52	118	1	1	1262	146	8.53	393.16	52	49	12957	11044.7	15092	14208.3	11123	13982.6	12957	10773.8	15031	13298.7	10750.1	14429		13127.9	0.819781	0.0370683	1.12204	0.238311	FALSE
Q9Y6H1	Q9Y6H1	Coiled-coil-helix-coiled-coil-helix domain-containing protein 2 [OS=Homo sapiens]	CHCHD2	coiled-coil-helix-coiled-coil-helix domain containing 2(CHCHD2)	0	21.969	15	2	18	2	1	151	15.5	9.22	75.65	2	0	6815.6	5310.4	4224.6	6633.9	5410.8	4343	6815.6	5180.16	4207.53	6209.21	5229.4	4481.65		6512.41	0.79921	0.0392222	0.667126	0.00909865	TRUE
Q9UNY4-1	Q9UNY4	transcription termination factor 2 [OS=Homo sapiens]	TTF2	transcription termination factor 2(TTF2)	0	248.193	46	43	85	43	1	1162	129.5	8.37	276.27	43	0	8488.5	7196.4	7757.7	9314.1	7334.5	7959.5	8488.5	7019.91	7726.36	8717.83	7088.61	8213.61		8603.16	0.819961	0.0788076	0.926402	0.672344	TRUE
Q96KP4	Q96KP4	cytosolic non-specific dipeptidase [OS=Homo sapiens]	CNDP2	CNDP dipeptidase 2 (metallopeptidase M20 family)(CNDP2)	0	260.591	69	23	106	23	1	475	52.8	5.97	448.21	23	0	16716.9	13720.5	17293.3	17384.6	14141.3	16818	16716.9	13384	17223.4	16271.7	13667.2	17354.9		16494.3	0.820018	0.0373251	1.04819	0.517976	FALSE
P12757	P12757	Ski-like protein [OS=Homo sapiens]	SKIL	SKI like proto-oncogene(SKIL)	0	14.75	7	4	7	4	1	684	76.9	7.11	9.36	4	0	471.8	418.9	429	568.2	428.8	420.4	471.8	408.626	427.267	531.825	414.425	433.822		501.812	0.820078	0.137167	0.857978	0.317379	TRUE
Q92845	Q92845	Kinesin-associated protein 3 [OS=Homo sapiens]	KIFAP3	kinesin associated protein 3(KIFAP3)	0	43.907	13	8	12	7	1	792	91.1	5.08	53.81	8	0	657.5	563.4	873.1	709.7	553.3	831	657.5	549.582	869.573	664.266	534.751	857.53		660.883	0.820367	0.13778	1.30666	0.102585	FALSE
Q14679	Q14679	Tubulin polyglutamylase TTLL4 [OS=Homo sapiens]	TTLL4	tubulin tyrosine ligase like 4(TTLL4)	0	53.264	12	10	17	10	1	1199	133.3	8.85	66.44	10	0	1120.6	875.6	985.5	1074.4	921.1	933.9	1120.6	854.126	981.519	1005.62	890.22	963.716		1063.11	0.820398	0.0916928	0.91488	0.510819	TRUE
O15050	O15050	TPR and ankyrin repeat-containing protein 1 [OS=Homo sapiens]	TRANK1	tetratricopeptide repeat and ankyrin repeat containing 1(TRANK1)	0	19.512	2	7	7	7	1	2925	336	6.76	14.74	7	0	401	350.7	369.7	421.1	321	398.8	401	342.099	368.207	394.142	310.239	411.532		397.571	0.820404	0.159143	0.980628	0.830712	TRUE
Q96DH6-1	Q96DH6	RNA-binding protein Musashi homolog 2 [OS=Homo sapiens]	MSI2	musashi RNA binding protein 2(MSI2)	0	84.818	35	10	36	10	1	328	35.2	8.48	133.99	10	0	6743.8	5489.8	6777.2	6959.2	5714.3	6498.9	6743.8	5355.16	6749.82	6513.69	5522.73	6706.38		6628.74	0.820509	0.066892	1.01499	0.808978	FALSE
Q9UBT6	Q9UBT6	DNA polymerase kappa [OS=Homo sapiens]	POLK	DNA polymerase kappa(POLK)	0	23.151	9	8	9	8	1	870	98.7	8.13	24.62	8	0	1128.3	1038.6	839	1318.2	957.4	877.9	1128.3	1013.13	835.611	1233.81	925.303	905.928		1181.06	0.820635	0.0920901	0.73728	0.0827418	TRUE
Q96AJ9-2	Q96AJ9	Vesicle transport through interaction with t-SNAREs homolog 1A [OS=Homo sapiens]	VTI1A	vesicle transport through interaction with t-SNAREs 1A(VTI1A)	0	24.655	31	4	6	4	1	217	25.2	6.4	24.27	4	0	421.6	440	288.2	492	440.4	292.8	421.6	429.209	287.036	460.503	425.636	302.148		441.052	0.969098	0.804298	0.667931	0.031971	TRUE
O60888-2	O60888	Isoform A of Protein CutA [OS=Homo sapiens]	CUTA	cutA divalent cation tolerance homolog(CUTA)	0	79.283	44	6	56	6	1	198	20.9	5.48	163.67	6	0	7423.5	6200.8	6803.6	8204.5	6572.3	6931.2	7423.5	6048.72	6776.12	7679.26	6351.97	7152.48		7551.38	0.821087	0.0808093	0.922255	0.649425	TRUE
Q5VV42	Q5VV42	threonylcarbamoyladenosine tRNA methylthiotransferase [OS=Homo sapiens]	CDKAL1	CDK5 regulatory subunit associated protein 1 like 1(CDKAL1)	0	147.457	48	21	57	21	1	579	65.1	7.46	209.73	21	0	6735.9	5799.9	6799.3	7691.5	5986.6	6462.5	6735.9	5657.66	6771.83	7199.11	5785.9	6668.82		6967.5	0.821209	0.0810285	0.964524	0.894847	TRUE
Q9NV88-1	Q9NV88	integrator complex subunit 9 [OS=Homo sapiens]	INTS9	integrator complex subunit 9(INTS9)	0	97.258	35	17	33	17	1	658	73.8	6.33	127.91	17	0	5746.8	4754	4966.6	5987.1	4849.6	4794.4	5746.8	4637.41	4946.54	5603.82	4687.02	4947.47		5675.31	0.821491	0.068481	0.871671	0.3646	TRUE
P22455-1	P22455	fibroblast growth factor receptor 4 [OS=Homo sapiens]	fgfr4	fibroblast growth factor receptor 4(FGFR4)	0.001	11.374	5	4	24	1	1	802	87.9	6.81	54.3	4	0	32.4	28.6	24.9	33.6	31.8	17.3	32.4	27.8986	24.7994	31.449	30.7339	17.8523		31.9245	0.918299	0.452109	0.668009	0.0245309	TRUE
Q14592	Q14592	Zinc finger protein 460 [OS=Homo sapiens]	ZNF460	zinc finger protein 460(ZNF460)	0	19.615	12	4	8	4	1	562	63.6	7.01	23.13	4	0	582.6	439.9	402.7	616.4	473.4	362.7	582.6	429.111	401.073	576.939	457.529	374.28		579.77	0.764649	0.053463	0.668673	0.030996	TRUE
Q9Y6Y0	Q9Y6Y0	influenza virus NS1A-binding protein [OS=Homo sapiens]	IVNS1ABP	influenza virus NS1A binding protein(IVNS1ABP)	0	76.372	29	14	25	14	1	642	71.7	5.53	77.6	14	0	2360.1	1930.6	1543.9	2489.5	1929.3	1562.7	2360.1	1883.25	1537.66	2330.13	1864.62	1612.59		2345.11	0.799081	0.0505841	0.671663	0.0320886	TRUE
Q6JBY9	Q6JBY9	CapZ-interacting protein [OS=Homo sapiens]	RCSD1	RCSD domain containing 1(RCSD1)	0	102.329	52	15	38	15	1	416	44.5	5.4	155.88	15	0	2715.7	2340.6	3454.6	2977.2	2318.4	3263.3	2715.7	2283.2	3440.64	2786.61	2240.68	3367.48		2751.15	0.822178	0.0792925	1.23732	0.177921	FALSE
O94916-4	O94916	Isoform D of Nuclear factor of activated T-cells 5 [OS=Homo sapiens]	NFAT5	nuclear factor of activated T-cells 5(NFAT5)	0	84.16	15	16	35	1	1	1548	167.6	5.3	89.53	16	13	2877.1	2550.5	3435.6	3206.1	2426.7	3279.7	2877.1	2487.95	3421.72	3000.85	2345.35	3384.41		2938.98	0.822275	0.0794512	1.15791	0.379866	FALSE
Q53H80	Q53H80	Akirin-2 [OS=Homo sapiens]	AKIRIN2	akirin 2(AKIRIN2)	0	18.948	22	4	11	3	1	203	22.5	8.73	33.82	4	0	1014	881.8	905.4	1113.2	859.9	1003.5	1014	860.174	901.742	1041.94	831.072	1035.54		1027.97	0.822616	0.095466	0.942287	0.623218	TRUE
O14979-1	O14979	Heterogeneous nuclear ribonucleoprotein D-like [OS=Homo sapiens]	HNRNPDL	heterogeneous nuclear ribonucleoprotein D like(HNRNPDL)	0	179.106	42	20	171	18	1	420	46.4	9.57	530.1	20	0	15426.3	12662.4	12382.8	16204.4	13273.7	11668.2	15426.3	12351.9	12332.8	15167	12828.7	12040.7		15296.7	0.823073	0.0407742	0.796693	0.130921	TRUE
Q9UJX5-3	Q9UJX5	Isoform 3 of Anaphase-promoting complex subunit 4 [OS=Homo sapiens]	ANAPC4	anaphase promoting complex subunit 4(ANAPC4)	0	94.08	19	15	49	15	1	809	92.2	5.53	137.89	15	0	6273	5196.7	5135.8	6485.7	5268.5	5089.8	6273	5069.25	5115.05	6070.5	5091.87	5252.3		6171.75	0.823196	0.0713175	0.839904	0.241632	TRUE
P13196	P13196	5-aminolevulinate synthase, nonspecific, mitochondrial [OS=Homo sapiens]	ALAS1	5'-aminolevulinate synthase 1(ALAS1)	0	28.237	16	6	11	6	1	640	70.5	8.46	35.51	6	0	669.3	557.3	610.5	686.4	555	580.1	669.3	543.632	608.034	642.458	536.394	598.62		655.879	0.823342	0.144226	0.919875	0.534291	TRUE
Q15759	Q15759	mitogen-activated protein kinase 11 [OS=Homo sapiens]	MAPK11	mitogen-activated protein kinase 11(MAPK11)	0	12.775	12	3	5	2	1	364	41.3	5.83	12.22	3	0	49.9	51.2	51.8	69.3	46.1	54.5	49.9	49.9443	51.5907	64.8636	44.5545	56.24		57.3818	0.823422	0.122165	0.93959	0.521815	TRUE
Q13951	Q13951	Core-binding factor subunit beta [OS=Homo sapiens]	CBFB	core-binding factor beta subunit(CBFB)	0	47.125	42	7	20	1	1	182	21.5	6.6	67.05	7	0	547	435.2	495	535.6	454	478.9	547	424.527	493	501.312	438.78	494.189		524.156	0.82352	0.144619	0.941695	0.625491	TRUE
O14578-4	O14578	Isoform 4 of Citron Rho-interacting kinase [OS=Homo sapiens]	CIT	citron rho-interacting serine/threonine kinase(CIT)	0	266.009	29	54	101	53	1	2069	236.5	6.67	322.17	54	1	11140.1	9262.9	9045.3	11591.5	9393.4	9185.5	11140.1	9035.72	9008.76	10849.4	9078.49	9478.76		10994.8	0.823765	0.0445491	0.840741	0.258266	TRUE
Q8N684-3	Q8N684	Isoform 3 of Cleavage and polyadenylation specificity factor subunit 7 [OS=Homo sapiens]	CPSF7	cleavage and polyadenylation specific factor 7(CPSF7)	0	119.076	30	17	46	17	1	514	56.3	8.87	170.86	17	0	4438.4	3886.2	4203	5066.3	3903.8	4040.4	4438.4	3790.89	4186.02	4741.97	3772.93	4169.39		4590.18	0.823912	0.103462	0.91014	0.545505	TRUE
P37268	P37268	squalene synthase [OS=Homo sapiens]	FDFT1	farnesyl-diphosphate farnesyltransferase 1(FDFT1)	0	146.894	49	18	85	18	1	417	48.1	6.54	213.6	18	0	7906.7	6892.6	7313.9	9102.2	7047.4	7042.6	7906.7	6723.56	7284.35	8519.5	6811.14	7267.44		8213.1	0.82397	0.0861208	0.88589	0.464218	TRUE
Q9BXK1	Q9BXK1	krueppel-like factor 16 [OS=Homo sapiens]	KLF16	Kruppel like factor 16(KLF16)	0	22.58	32	4	7	4	1	252	25.4	9.88	20.14	4	0	881.3	776.2	559.3	817	799.9	532	881.3	757.163	557.041	764.697	773.084	548.985		822.999	0.929678	0.540533	0.671948	0.0428606	TRUE
Q8N6R0-5	Q8N6R0	Methyltransferase-like protein 13 [OS=Homo sapiens]	METTL13	methyltransferase like 13(METTL13)	0	121.137	37	22	41	22	1	699	78.7	6.73	141.89	22	0	4820.6	3966	4271.3	5035	4125.7	4028.1	4820.6	3868.73	4254.05	4712.67	3987.39	4156.7		4766.63	0.824074	0.103774	0.882252	0.403104	TRUE
Q969Z0-1	Q969Z0	Protein TBRG4 [OS=Homo sapiens]	TBRG4	transforming growth factor beta regulator 4(TBRG4)	0	173.096	57	25	76	25	1	631	70.7	7.42	284.04	25	0	7074.3	5967.3	6650.5	7633.3	6101.4	6417.8	7074.3	5820.95	6623.63	7144.63	5896.85	6622.69		7109.47	0.824099	0.086364	0.931598	0.701496	TRUE
Q9BZL6	Q9BZL6	Serine/threonine-protein kinase D2 [OS=Homo sapiens]	prkd2	protein kinase D2(PRKD2)	0	157.361	40	24	85	21	1	878	96.7	6.84	276.69	24	4	7900.5	6705	9157.7	8424.3	6694.1	8871.7	7900.5	6540.56	9120.71	7884.99	6469.68	9154.94		7892.75	0.82419	0.0865365	1.15775	0.25334	FALSE
Q96S16-1	Q96S16	JmjC domain-containing protein 8 [OS=Homo sapiens]	JMJD8	jumonji domain containing 8(JMJD8)	0.002	7.196	6	2	3	2	1	334	36.8	9.72	8.01	2	0	434.8	458.8	367.6	551.5	348	431.6	434.8	447.548	366.115	516.194	336.333	445.379		475.497	0.824276	0.168281	0.853312	0.317311	TRUE
P05026	P05026	Sodium/potassium-transporting ATPase subunit beta-1 [OS=Homo sapiens]	ATP1B1	ATPase Na+/K+ transporting subunit beta 1(ATP1B1)	0	19.887	15	4	5	4	1	303	35	8.53	19.05	4	0	529.3	472.8	555.5	611	462.2	606.8	529.3	461.204	553.256	571.885	446.705	626.173		550.592	0.824484	0.146759	1.07105	0.776785	FALSE
Q9UBT7	Q9UBT7	Alpha-catulin [OS=Homo sapiens]	CTNNAL1	catenin alpha like 1(CTNNAL1)	0	25.849	11	6	8	6	1	734	81.8	6.64	29.88	6	0	743.7	653	627.6	864.1	665.4	596.7	743.7	636.985	625.065	808.782	643.093	615.75		776.241	0.824536	0.141347	0.799246	0.198783	TRUE
Q96FA3	Q96FA3	E3 ubiquitin-protein ligase pellino homolog 1 [OS=Homo sapiens]	PELI1	pellino E3 ubiquitin protein ligase 1(PELI1)	0.004	5.659	4	2	3	2	1	418	46.3	8.03	8.65	2	0	243.8	194.1	175.4	208.5	178.6	148.1	243.8	189.34	174.691	195.152	172.612	152.828		219.476	0.824582	0.087546	0.74614	0.0821815	TRUE
Q9HCC0-1	Q9HCC0	Methylcrotonoyl-CoA carboxylase beta chain, mitochondrial [OS=Homo sapiens]	MCCC2	methylcrotonoyl-CoA carboxylase 2(MCCC2)	0	149.981	46	21	71	21	1	563	61.3	7.68	247.22	21	0	11011.2	9445.2	9088.4	11903.5	9368	9139	11011.2	9213.55	9051.69	11141.5	9053.94	9430.77		11076.3	0.824618	0.0455936	0.834322	0.235998	TRUE
Q9P275-2	Q9P275	Isoform 2 of Ubiquitin carboxyl-terminal hydrolase 36 [OS=Homo sapiens]	USP36	ubiquitin specific peptidase 36(USP36)	0	139.79	31	30	47	30	1	1123	122.8	9.7	152.2	30	0	4668.9	3947	3910.1	5109.7	4080.5	3747.5	4668.9	3850.2	3894.3	4782.59	3943.7	3867.14		4725.74	0.824622	0.104838	0.821188	0.179216	TRUE
P35221-2	P35221	Isoform 2 of Catenin alpha-1 [OS=Homo sapiens]	CTNNA1	catenin alpha 1(CTNNA1)	0	198.432	43	31	61	31	1	930	102.6	6.34	201.12	31	0	7556.1	6131	6780.1	7562	6298.7	6366.4	7556.1	5980.64	6752.71	7077.9	6087.54	6569.65		7317	0.824667	0.0874462	0.910371	0.585615	TRUE
P30520	P30520	adenylosuccinate synthetase isozyme 2 [OS=Homo sapiens]	ADSS	adenylosuccinate synthase(ADSS)	0	170.668	53	24	89	21	1	456	50.1	6.55	303.87	24	2	10497.7	8998.5	9827	11614.1	9154.1	9325.7	10497.7	8777.81	9787.3	10870.6	8847.21	9623.43		10684.1	0.824821	0.045845	0.90839	0.57845	TRUE
Q9Y6R9	Q9Y6R9	Coiled-coil domain-containing protein 61 [OS=Homo sapiens]	CCDC61	coiled-coil domain containing 61(CCDC61)	0.001	8.21	4	2	2	2	1	512	57.3	10.27	8.47	2	0	217.7	169.2	190	202.1	176.6	189.5	217.7	165.05	189.232	189.162	170.68	195.55		203.431	0.825169	0.0886183	0.945732	0.581524	TRUE
Q96DU9-1	Q96DU9	Polyadenylate-binding protein 5 [OS=Homo sapiens]	PABPC5	poly(A) binding protein cytoplasmic 5(PABPC5)	0	18.317	8	4	11	1	1	382	43.3	9.51	18.49	4	0	23.4	23.2	21.1	29.7	20.3	24.1	23.4	22.631	21.0148	27.7987	19.6194	24.8694		25.5993	0.825226	0.125855	0.896199	0.369457	TRUE
Q9NRP4	Q9NRP4	Succinate dehydrogenase assembly factor 3, mitochondrial [OS=Homo sapiens]	SDHAF3	succinate dehydrogenase complex assembly factor 3(SDHAF3)	0.001	9.029	25	3	10	3	1	125	14.6	9.07	26.56	3	0	1573.2	1452.3	1329	1815	1328.3	1240.8	1573.2	1416.68	1323.63	1698.81	1283.77	1280.41		1636	0.825319	0.0876444	0.795855	0.139256	TRUE
Q15742-1	Q15742	NGFI-A-binding protein 2 [OS=Homo sapiens]	nab2	NGFI-A binding protein 2(NAB2)	0	42.568	24	10	11	9	1	525	56.6	6.96	41.15	10	0	1421.7	1185.2	1481.5	1482.2	1202.9	1408	1421.7	1156.13	1475.52	1387.31	1162.57	1452.95		1404.51	0.825452	0.0878806	1.04253	0.844495	FALSE
Q8N6N7	Q8N6N7	acyl-CoA-binding domain-containing protein 7 [OS=Homo sapiens]	ACBD7	acyl-CoA binding domain containing 7(ACBD7)	0.001	12.541	24	2	3	2	1	88	9.8	6.71	9.65	2	0	286.6	248.5	222.6	289.2	225.2	240	286.6	242.405	221.701	270.686	217.65	247.662		278.643	0.825529	0.0892812	0.84223	0.243331	TRUE
Q96EK7	Q96EK7	Constitutive coactivator of peroxisome proliferator-activated receptor gamma [OS=Homo sapiens]	FAM120B	family with sequence similarity 120B(FAM120B)	0	142.416	35	27	45	27	1	910	103.7	5.69	151.83	27	0	6287.9	5387.3	5417.7	6864	5421.3	5373.8	6287.9	5255.17	5395.81	6424.58	5239.55	5545.36		6356.24	0.825545	0.0753795	0.860664	0.318181	TRUE
Q9BY12	Q9BY12	S phase cyclin A-associated protein in the endoplasmic reticulum [OS=Homo sapiens]	SCAPER	S-phase cyclin A associated protein in the ER(SCAPER)	0.001	10.344	2	3	3	3	1	1400	158.2	7.44	8.84	3	0	69.1	64.9	57.4	67	47.1	58.2	69.1	63.3083	57.1681	62.7108	45.521	60.0581		65.9054	0.825648	0.12673	0.889352	0.348227	TRUE
Q92556-1	Q92556	Engulfment and cell motility protein 1 [OS=Homo sapiens]	ELMO1	engulfment and cell motility 1(ELMO1)	0	22.297	11	6	7	4	1	727	83.8	6.28	23.74	6	0	757.5	624.9	578.9	753.7	619.5	578.9	757.5	609.574	576.561	705.45	598.731	597.382		731.475	0.825938	0.14447	0.80245	0.205369	TRUE
Q5SSJ5-1	Q5SSJ5	Heterochromatin protein 1-binding protein 3 [OS=Homo sapiens]	HP1BP3	heterochromatin protein 1 binding protein 3(HP1BP3)	0	131.412	35	22	66	19	1	553	61.2	9.67	200.6	22	3	8800.5	6898.5	5890.4	9788.4	7042.3	6013	8800.5	6729.31	5866.6	9161.77	6806.21	6204.97		8981.13	0.753553	0.0145355	0.672052	0.018135	TRUE
Q8NB90-1	Q8NB90	Spermatogenesis-associated protein 5 [OS=Homo sapiens]	SPATA5	spermatogenesis associated 5(SPATA5)	0	238.148	45	33	81	32	1	893	97.8	5.66	301.74	33	0	10351.1	9049.7	7697.8	11228.8	8695.8	7671.9	10351.1	8827.75	7666.7	10510	8404.28	7916.83		10430.5	0.826038	0.0473772	0.747016	0.0539864	TRUE
Q15834	Q15834	Coiled-coil domain-containing protein 85B [OS=Homo sapiens]	CCDC85B	coiled-coil domain containing 85B(CCDC85B)	0	14.644	26	4	4	4	1	202	22.1	5.08	12.67	4	0	622.1	537.7	473.9	669.2	524.4	445.3	622.1	524.513	471.986	626.359	506.82	459.517		624.23	0.826084	0.150368	0.746121	0.0922465	TRUE
Q9Y5T5-2	Q9Y5T5	Isoform 2 of Ubiquitin carboxyl-terminal hydrolase 16 [OS=Homo sapiens]	USP16	ubiquitin specific peptidase 16(USP16)	0	182.108	39	26	71	1	1	822	93.4	6.93	228.52	26	0	49.3	52.5	70	78.8	52.2	75	49.3	51.2124	69.7172	73.7554	50.45	77.3944		61.5277	0.826152	0.127782	1.19549	0.5196	FALSE
Q96NT0	Q96NT0	Coiled-coil domain-containing protein 115 [OS=Homo sapiens]	CCDC115	coiled-coil domain containing 115(CCDC115)	0	36.853	44	6	22	6	1	180	19.7	6.95	70.63	6	0	1883.5	1724.1	1805.3	2174.6	1610.1	1835.7	1883.5	1681.82	1798.01	2035.39	1556.12	1894.31		1959.44	0.826239	0.117678	0.942184	0.66084	TRUE
Q9P0W2	Q9P0W2	SWI/SNF-related matrix-associated actin-dependent regulator of chromatin subfamily E member 1-related [OS=Homo sapiens]	HMG20B	high mobility group 20B(HMG20B)	0	59.767	38	10	29	10	1	317	35.8	9.35	104.39	10	0	3205	3413.8	2142.5	3343.8	3392.4	2061.3	3205	3330.08	2133.84	3129.74	3278.67	2127.11		3167.37	1.04326	0.720569	0.672633	0.0130379	FALSE
Q9BWU1-1	Q9BWU1	Cyclin-dependent kinase 19 [OS=Homo sapiens]	CDK19	cyclin dependent kinase 19(CDK19)	0	49.637	18	7	21	2	1	502	56.8	8.53	67.49	7	0	345.8	311.2	382.9	387.2	291.5	381.6	345.8	303.568	381.353	362.412	281.728	393.783		354.106	0.82644	0.173559	1.0945	0.718206	FALSE
Q9BTU6	Q9BTU6	Phosphatidylinositol 4-kinase type 2-alpha [OS=Homo sapiens]	PI4K2A	phosphatidylinositol 4-kinase type 2 alpha(PI4K2A)	0	105.298	59	22	40	22	1	479	54	8.29	137.09	22	0	7114.1	6095.4	7834.9	7648.6	6054	7862.9	7114.1	5945.91	7803.25	7158.95	5851.04	8113.93		7136.53	0.826519	0.0910489	1.11519	0.386546	FALSE
P49589-3	P49589	Isoform 3 of Cysteine--tRNA ligase, cytoplasmic [OS=Homo sapiens]	CARS	cysteinyl-tRNA synthetase(CARS)	0	374.798	64	48	225	9	1	831	94.6	6.83	783.51	48	42	26712	27889.4	17621	27831.7	28268.5	17397.7	26712	27205.4	17549.8	26050	27320.8	17953.1		26381	1.03344	0.69812	0.672889	0.00200797	FALSE
Q9UK33	Q9UK33	Zinc finger protein 580 [OS=Homo sapiens]	ZNF580	zinc finger protein 580(ZNF580)	0.001	8.656	17	2	2	2	1	172	18.7	10.08	9.3	2	0	125.9	112.6	118.7	135.6	102.7	115.4	125.9	109.838	118.22	126.919	99.257	119.084		126.41	0.827055	0.177277	0.938634	0.562352	TRUE
Q9HBE1-1	Q9HBE1	POZ-, AT hook-, and zinc finger-containing protein 1 [OS=Homo sapiens]	PATZ1	POZ/BTB and AT hook containing zinc finger 1(PATZ1)	0.001	11.361	6	4	4	3	1	687	74	8.35	10.73	4	0	68.1	60.6	48.1	75.7	66.6	44.2	68.1	59.1138	47.9057	70.8538	64.3673	45.6111		69.4769	0.888648	0.317311	0.673006	0.0264785	TRUE
Q15043	Q15043	Zinc transporter ZIP14 [OS=Homo sapiens]	SLC39A14	solute carrier family 39 member 14(SLC39A14)	0	22.794	11	4	7	4	1	492	54.2	5.33	30.16	4	0	1087.8	963.4	1132.6	1203.8	922.9	1117.9	1087.8	939.772	1128.02	1126.74	891.96	1153.59		1107.27	0.827141	0.103548	1.03029	0.967453	FALSE
Q15003	Q15003	Condensin complex subunit 2 [OS=Homo sapiens]	NCAPH	non-SMC condensin I complex subunit H(NCAPH)	0	203.565	50	27	78	27	1	741	82.5	5.06	308.96	27	0	10130.4	8903.1	9087.7	11189.7	8647.7	8979.5	10130.4	8684.75	9050.99	10473.4	8357.79	9266.18		10301.9	0.827157	0.0488233	0.889021	0.471377	TRUE
P17947-2	P17947	Isoform 2 of Transcription factor PU.1 [OS=Homo sapiens]	SPI1	Spi-1 proto-oncogene(SPI1)	0.008	4.481	4	1	1	1	1	271	31.2	6.8	3.15	1	0	70.7	46.6	71.1	60.3	61.8	62.1	70.7	45.4571	70.8128	56.4397	59.7282	64.0826		63.5699	0.82732	0.130247	1.061	0.953986	FALSE
Q9UKK3	Q9UKK3	Poly [ADP-ribose] polymerase 4 [OS=Homo sapiens]	PARP4	poly(ADP-ribose) polymerase family member 4(PARP4)	0	59.51	10	14	27	14	1	1724	192.5	5.66	77.51	14	0	3401.2	2809.4	3852.5	3532.2	2906.2	3643.6	3401.2	2740.5	3836.94	3306.08	2808.77	3759.93		3353.64	0.827351	0.0880722	1.13263	0.466096	FALSE
Q15583	Q15583	Homeobox protein TGIF1 [OS=Homo sapiens]	TGIF1	TGFB induced factor homeobox 1(TGIF1)	0	15.216	13	5	7	5	1	401	43	8.92	19.15	5	0	690.4	583	534.4	706.3	568.6	515.4	690.4	568.702	532.241	661.084	549.538	531.855		675.742	0.827416	0.153422	0.787354	0.152257	TRUE
Q96ER3	Q96ER3	protein saal1 [OS=Homo sapiens]	SAAL1	serum amyloid A like 1(SAAL1)	0	72.206	28	13	24	13	1	474	53.5	4.5	84.06	13	0	3881.4	3253.5	2753.6	4055.5	3289	2714.2	3881.4	3173.71	2742.48	3795.87	3178.74	2800.85		3838.64	0.827435	0.0533025	0.722044	0.0629634	TRUE
Q9NPI6	Q9NPI6	mRNA-decapping enzyme 1A [OS=Homo sapiens]	DCP1A	decapping mRNA 1A(DCP1A)	0	108.476	40	15	43	15	1	582	63.3	6.25	165.34	15	0	3256.5	3010.5	3858	3439.2	2505.7	3812.1	3256.5	2936.67	3842.41	3219.03	2421.7	3933.8		3237.76	0.827479	0.0882993	1.20086	0.257701	FALSE
P51955	P51955	Serine/threonine-protein kinase Nek2 [OS=Homo sapiens]	NEK2	NIMA related kinase 2(NEK2)	0	53.888	25	10	21	9	1	445	51.7	8.9	65.04	10	0	1328.6	1044.2	1172.1	1242.2	1079.8	1109.9	1328.6	1018.59	1167.37	1162.68	1043.6	1145.33		1245.64	0.827765	0.104703	0.928319	0.564594	TRUE
Q15345-2	Q15345	Leucine-rich repeat-containing protein 41 [OS=Homo sapiens]	LRRC41	leucine rich repeat containing 41(LRRC41)	0	80.725	26	17	27	17	1	812	88.6	8.38	80.77	17	0	1641.8	1384.7	1627	1788.4	1444.1	1552.1	1641.8	1350.74	1620.43	1673.91	1395.69	1601.65		1657.86	0.828307	0.121958	0.971762	0.808863	TRUE
P41134	P41134	DNA-binding protein inhibitor ID-1 [OS=Homo sapiens]	ID1	inhibitor of DNA binding 1, HLH protein(ID1)	0	33.76	54	5	7	5	1	155	16.1	6.99	32.03	5	0	538.7	460.4	474	582	463.9	528.8	538.7	449.109	472.085	544.742	448.348	545.682		541.721	0.828339	0.155565	0.939384	0.615521	TRUE
O14976	O14976	Cyclin-G-associated kinase [OS=Homo sapiens]	GAK	cyclin G associated kinase(GAK)	0	196.926	36	36	73	36	1	1311	143.1	5.73	250.1	36	0	7530.3	6276.7	6538.8	7823.8	6398.1	6332	7530.3	6122.76	6512.39	7322.94	6183.61	6534.15		7426.62	0.828531	0.0950969	0.878363	0.429925	TRUE
Q9BZB8-1	Q9BZB8	Cytoplasmic polyadenylation element-binding protein 1 [OS=Homo sapiens]	CPEB1	cytoplasmic polyadenylation element binding protein 1(CPEB1)	0	22.083	12	4	8	4	1	566	62.6	7.61	28.51	4	0	637	558.2	496.4	699	543.6	501.9	637	544.51	494.395	654.251	525.376	517.924		645.626	0.828565	0.156095	0.783982	0.146442	TRUE
Q9NPC7-1	Q9NPC7	Myoneurin [OS=Homo sapiens]	MYNN	myoneurin(MYNN)	0.001	8.975	3	2	4	1	1	610	68.6	8.25	10.48	2	0	70.7	72.2	76.8	94.4	63.5	70.3	70.7	70.4293	76.4897	88.3567	61.3712	72.5444		79.5283	0.828638	0.13307	0.936988	0.511849	TRUE
P09417	P09417	dihydropteridine reductase [OS=Homo sapiens]	QDPR	quinoid dihydropteridine reductase(QDPR)	0	129.191	72	12	83	12	1	244	25.8	7.37	247.77	12	0	6322	5553.3	5763.8	6986.7	5423.1	5818.2	6322	5417.1	5740.52	6539.43	5241.29	6003.95		6430.71	0.82871	0.0811501	0.913154	0.574446	TRUE
O43482	O43482	Protein Mis18-beta [OS=Homo sapiens]	OIP5	Opa interacting protein 5(OIP5)	0	43.54	51	7	14	7	1	229	24.7	7.37	46.15	7	0	1065.2	874.6	789.8	1087.4	903.4	748.8	1065.2	853.15	786.609	1017.79	873.114	772.706		1041.49	0.828745	0.106539	0.748596	0.0956444	TRUE
A8K855-1	A8K855	EF-hand calcium-binding domain-containing protein 7 [OS=Homo sapiens]	EFCAB7	EF-hand calcium binding domain 7(EFCAB7)	0.001	10.559	6	3	3	3	1	629	71.9	6.38	9.94	3	0	215	159.6	171.9	207.5	190.1	168.7	215	155.686	171.206	194.216	183.727	174.086		204.608	0.829421	0.096707	0.843787	0.247092	TRUE
Q9NVE5-3	Q9NVE5	Isoform 3 of Ubiquitin carboxyl-terminal hydrolase 40 [OS=Homo sapiens]	USP40	ubiquitin specific peptidase 40(USP40)	0.005	5.496	2	2	2	2	1	1247	141.5	5.71	5.4	2	0	319	271.1	302.2	354.7	285.3	312.5	319	264.451	300.979	331.993	275.735	322.477		325.496	0.829789	0.181964	0.9577	0.72231	TRUE
Q6YHU6	Q6YHU6	Thyroid adenoma-associated protein [OS=Homo sapiens]	THADA	THADA, armadillo repeat containing(THADA)	0	234.286	29	46	83	46	1	1953	219.5	6.06	298.06	46	0	14027.2	11743.4	11689.7	14414.3	11781.4	11584.7	14027.2	11455.4	11642.5	13491.5	11386.4	11954.6		13759.4	0.830046	0.0496676	0.85749	0.345573	TRUE
O00160	O00160	Unconventional myosin-If [OS=Homo sapiens]	MYO1F	myosin IF(MYO1F)	0.001	11.308	4	3	4	3	1	1098	124.8	9.11	12.24	3	0	134.8	105	135.1	127.1	112	120	134.8	102.425	134.554	118.963	108.245	123.831		126.882	0.830183	0.184296	1.01821	0.91368	FALSE
O75607	O75607	Nucleoplasmin-3 [OS=Homo sapiens]	NPM3	nucleophosmin/nucleoplasmin 3(NPM3)	0	81.488	56	6	25	6	1	178	19.3	4.63	117.1	6	0	1516.2	1315.5	1340.8	1677.3	1323.2	1279.2	1516.2	1283.24	1335.38	1569.92	1278.84	1320.04		1543.06	0.830193	0.0966466	0.86044	0.305141	TRUE
O43808	O43808	peroxisomal membrane protein PMP34 [OS=Homo sapiens]	SLC25A17	solute carrier family 25 member 17(SLC25A17)	0.003	6.26	6	1	1	1	1	307	34.5	10.08	5.83	1	0	101.2	85.9	79.6	110.2	88.9	79.4	101.2	83.7933	79.2784	103.145	85.9196	81.9349		102.173	0.830521	0.185066	0.788926	0.142833	TRUE
Q9Y2X9	Q9Y2X9	Zinc finger protein 281 [OS=Homo sapiens]	ZNF281	zinc finger protein 281(ZNF281)	0	96.753	27	14	34	13	1	895	96.9	8.48	147.11	14	0	3468.1	2957	3064	3769.8	3028.5	2932.5	3468.1	2884.48	3051.62	3528.46	2926.97	3026.12		3498.28	0.830615	0.0576149	0.868676	0.362931	TRUE
Q9UBB4-1	Q9UBB4	Ataxin-10 [OS=Homo sapiens]	ATXN10	ataxin 10(ATXN10)	0	210.342	47	24	107	23	1	475	53.5	5.25	360.15	24	0	17297.2	14510.9	14307.5	17976.7	14683	13733.2	17297.2	14155	14249.7	16825.9	14190.8	14171.6		17061.5	0.830692	0.0505681	0.832907	0.240963	TRUE
Q6PCD5	Q6PCD5	E3 ubiquitin-protein ligase RFWD3 [OS=Homo sapiens]	RFWD3	ring finger and WD repeat domain 3(RFWD3)	0	55.136	20	11	33	11	1	774	85	6.46	87.53	11	0	1462.9	1260.4	1390.6	1549.5	1233.1	1376.5	1462.9	1229.49	1384.98	1450.3	1191.76	1420.45		1456.6	0.831129	0.0984581	0.963004	0.759663	TRUE
P31641	P31641	Sodium- and chloride-dependent taurine transporter [OS=Homo sapiens]	SLC6A6	solute carrier family 6 member 6(SLC6A6)	0.008	4.265	3	1	2	1	1	620	69.8	7.39	5.59	1	0	196.3	160.9	240	188.7	158.3	207.5	196.3	156.954	239.03	176.62	152.993	214.125		186.46	0.831136	0.10013	1.21515	0.365519	FALSE
Q9UKU7	Q9UKU7	Isobutyryl-CoA dehydrogenase, mitochondrial [OS=Homo sapiens]	ACAD8	acyl-CoA dehydrogenase family member 8(ACAD8)	0	27.847	15	6	11	6	1	415	45	7.85	26.06	6	0	832.9	751.2	608.6	944.1	718	605.2	832.9	732.777	606.141	883.661	693.929	624.522		858.28	0.831142	0.15653	0.716935	0.0778101	TRUE
Q9NW82	Q9NW82	WD repeat-containing protein 70 [OS=Homo sapiens]	WDR70	WD repeat domain 70(WDR70)	0	169.652	54	27	58	27	1	654	73.2	6.33	216.86	27	0	8127	6869.5	6109.1	8549.4	6939.5	6164.9	8127	6701.02	6084.42	8002.08	6706.85	6361.72		8064.54	0.831286	0.100872	0.771658	0.1089	TRUE
O94762-1	O94762	ATP-dependent DNA helicase Q5 [OS=Homo sapiens]	RECQL5	RecQ like helicase 5(RECQL5)	0	135.537	31	25	46	25	1	991	108.8	8.56	171.79	25	0	7322.7	6160.3	5628.5	7699.1	6280.3	5598.1	7322.7	6009.22	5605.76	7206.22	6069.75	5776.82		7264.46	0.831374	0.101062	0.783443	0.130211	TRUE
P51570-2	P51570	Isoform 2 of Galactokinase [OS=Homo sapiens]	GALK1	galactokinase 1(GALK1)	0	148.421	53	16	70	16	1	422	45.3	6.68	288.14	16	0	5376.3	4522.2	4873.2	5576.8	4553	4839	5376.3	4411.29	4853.51	5219.78	4400.36	4993.49		5298.04	0.831595	0.119151	0.929306	0.656066	TRUE
P78395	P78395	melanoma antigen preferentially expressed in tumors [OS=Homo sapiens]	PRAME	preferentially expressed antigen in melanoma(PRAME)	0	125.396	41	17	70	17	1	509	57.9	6.9	209.43	17	0	9265.9	7832	7041.6	9612.1	7809.8	6983.3	9265.9	7639.92	7013.15	8996.75	7547.98	7206.25		9131.33	0.831637	0.0549925	0.778606	0.0972151	TRUE
Q86V48-1	Q86V48	Leucine zipper protein 1 [OS=Homo sapiens]	LUZP1	leucine zipper protein 1(LUZP1)	0	200.098	43	37	60	37	1	1076	120.2	8.5	217.51	37	0	6415.1	5355.3	4229.9	6645.4	5616.7	4158.1	6415.1	5223.96	4212.81	6219.97	5428.4	4290.85		6317.54	0.843079	0.112001	0.67302	0.0104888	TRUE
O75122-3	O75122	Isoform 3 of CLIP-associating protein 2 [OS=Homo sapiens]	CLASP2	cytoplasmic linker associated protein 2(CLASP2)	0	365.962	46	54	155	7	1	1515	165.8	8.37	539.69	54	52	19286.7	16332.9	15579.6	20446.5	16588.6	15151.6	19286.7	15932.3	15516.7	19137.6	16032.5	15635.3		19212.1	0.831891	0.0522757	0.810738	0.16776	TRUE
P14222	P14222	perforin-1 [OS=Homo sapiens]	PRF1	perforin 1(PRF1)	0.004	5.729	4	1	1	1	1	555	61.3	7.83	5.66	1	0	48.1	39.4	65.7	49.1	41.2	68.2	48.1	38.4337	65.4346	45.9567	39.8188	70.3773		47.0284	0.831971	0.140423	1.44394	0.0841737	FALSE
P49327	P49327	Fatty acid synthase [OS=Homo sapiens]	FASN	fatty acid synthase(FASN)	0	1232.34	62	125	999	123	1	2511	273.3	6.44	3436.43	125	2	120425	102227	114825	128424	104095	109659	120425	99719.7	114361	120203	100606	113160		120314	0.832511	0.0266995	0.945531	0.776848	TRUE
Q96GK7	Q96GK7	fumarylacetoacetate hydrolase domain-containing protein 2A [OS=Homo sapiens]	FAHD2A	fumarylacetoacetate hydrolase domain containing 2A(FAHD2A)	0	124.817	50	14	75	3	1	314	34.6	8.24	244.54	14	14	10244	9098.9	8066.2	11375.2	8817.9	8332.2	10244	8875.75	8033.61	10647	8522.28	8598.21		10445.5	0.832801	0.0566976	0.796125	0.131136	TRUE
Q04637-8	Q04637	Isoform 8 of Eukaryotic translation initiation factor 4 gamma 1 [OS=Homo sapiens]	EIF4G1	eukaryotic translation initiation factor 4 gamma 1(EIF4G1)	0	624.22	50	75	394	1	1	1600	175.5	5.33	1264.13	75	0	94.7	94.6	100.6	121.5	84.2	83.4	94.7	92.2799	100.194	113.722	81.3772	86.0626		104.211	0.8332	0.19126	0.89365	0.397795	TRUE
P52306-4	P52306	Isoform 4 of Rap1 GTPase-GDP dissociation stimulator 1 [OS=Homo sapiens]	RAP1GDS1	Rap1 GTPase-GDP dissociation stimulator 1(RAP1GDS1)	0	163.521	43	23	55	1	1	607	66.3	5.31	186.78	23	20	9546.9	8188.8	7586.6	10311.1	8286.7	7619.1	9546.9	7987.97	7555.95	9651	8008.89	7862.35		9598.95	0.833261	0.0573832	0.803124	0.147014	TRUE
Q8IUF1	Q8IUF1	COBW domain-containing protein 2 [OS=Homo sapiens]	CBWD2	COBW domain containing 2(CBWD2)	0	91.775	42	13	46	13	1	395	44	4.89	135.28	13	0	4545.1	3836.1	3745.8	4699.1	3838.9	3510	4545.1	3742.02	3730.67	4398.27	3710.2	3622.06		4471.69	0.833267	0.122801	0.822143	0.181796	TRUE
Q6BCY4	Q6BCY4	NADH-cytochrome b5 reductase 2 [OS=Homo sapiens]	CYB5R2	cytochrome b5 reductase 2(CYB5R2)	0	42.733	50	10	17	10	1	276	31.4	8.5	63.6	10	0	1874.9	1600.7	1704.6	2046.8	1653.3	1630.5	1874.9	1561.44	1697.71	1915.77	1597.87	1682.56		1895.33	0.833446	0.133121	0.891734	0.438613	TRUE
Q5SXM2	Q5SXM2	SnRNA-activating protein complex subunit 4 [OS=Homo sapiens]	SNAPC4	small nuclear RNA activating complex polypeptide 4(SNAPC4)	0	65.72	13	12	23	12	1	1469	159.3	8.28	70.23	12	0	2113.4	1742.6	1560.8	2168.5	1814.4	1448.4	2113.4	1699.86	1554.49	2029.68	1753.57	1494.64		2071.54	0.833544	0.133341	0.735959	0.0700871	TRUE
Q9UGV2	Q9UGV2	protein NDRG3 [OS=Homo sapiens]	NDRG3	NDRG family member 3(NDRG3)	0	121.986	61	15	42	14	1	375	41.4	5.31	165.9	15	1	6511.8	5491.2	5539.4	6738	5515.6	5436	6511.8	5356.53	5517.02	6306.65	5330.69	5609.55		6409.22	0.833737	0.0910479	0.868012	0.348723	TRUE
Q9BR77-1	Q9BR77	Coiled-coil domain-containing protein 77 [OS=Homo sapiens]	CCDC77	coiled-coil domain containing 77(CCDC77)	0	13.487	10	4	7	4	1	488	57.5	8.72	18.94	4	0	642.7	506.4	448.4	704.5	545.9	416.7	642.7	493.98	446.589	659.399	527.599	430.004	Acetyl [N-Term]	651.05	0.784563	0.0764976	0.673214	0.0332244	TRUE
P56277-1	P56277	cx9C motif-containing protein 4 [OS=Homo sapiens]	cmc4	C-X9-C motif containing 4(CMC4)	0.001	9.481	26	2	3	2	1	68	7.7	8.18	9.45	2	0	289.7	248.1	201.2	320.4	258.4	218.2	289.7	242.015	200.387	299.889	249.737	225.166		294.794	0.83406	0.106193	0.72178	0.0596956	TRUE
Q8IWZ8-1	Q8IWZ8	SURP and G-patch domain-containing protein 1 [OS=Homo sapiens]	SUGP1	SURP and G-patch domain containing 1(SUGP1)	0	229.77	59	28	97	28	1	645	72.4	7.61	358.39	28	0	9366.8	7342	6233.4	9980.2	7209.5	6196.4	9366.8	7161.94	6208.22	9341.29	6967.8	6394.23		9354.04	0.755274	0.00524578	0.673636	0.0107569	TRUE
P20290-2	P20290	Isoform 2 of Transcription factor BTF3 [OS=Homo sapiens]	BTF3	basic transcription factor 3(BTF3)	0	166.225	80	12	129	1	1	162	17.7	7.5	386.49	12	0	5180.8	4792.2	4256.9	6205.4	4651.4	3861.7	5180.8	4674.67	4239.7	5808.14	4495.46	3984.99		5494.47	0.834487	0.0926044	0.748452	0.0533911	TRUE
Q5T6S3-2	Q5T6S3	Isoform 2 of PHD finger protein 19 [OS=Homo sapiens]	PHF19	PHD finger protein 19(PHF19)	0	39.452	57	9	14	3	1	207	22.5	8.51	46.98	9	0	1476.2	1204.1	1329.5	1497.6	1269.7	1201.2	1476.2	1174.57	1324.13	1401.73	1227.13	1239.55		1438.96	0.834525	0.105257	0.890807	0.416547	TRUE
Q5H9S7	Q5H9S7	DDB1- and CUL4-associated factor 17 [OS=Homo sapiens]	DCAF17	DDB1 and CUL4 associated factor 17(DCAF17)	0	15.281	14	5	8	5	1	520	58.7	7.01	19.7	5	0	233.2	202.5	212.7	257.8	205.4	209.9	233.2	197.534	211.841	241.296	198.514	216.601		237.248	0.83467	0.107493	0.902941	0.420447	TRUE
Q5H9F3-3	Q5H9F3	Isoform 3 of BCL-6 corepressor-like protein 1 [OS=Homo sapiens]	BCORL1	BCL6 corepressor-like 1(BCORL1)	0	79.768	14	19	27	18	1	1785	190.5	7.85	81.12	19	0	1805.4	1561.2	1763	1961.8	1569.4	1701	1805.4	1522.91	1755.88	1836.21	1516.79	1755.31		1820.8	0.834713	0.135991	0.964185	0.770039	TRUE
Q10567-3	Q10567	Isoform C of AP-1 complex subunit beta-1 [OS=Homo sapiens]	AP1B1	adaptor related protein complex 1 beta 1 subunit(AP1B1)	0	403.545	50	52	204	1	1	939	103.5	5.16	700.78	52	0	414.5	367.1	268	425.6	360.7	273.1	414.5	358.097	266.917	398.354	348.608	281.819		406.427	0.869411	0.305088	0.675074	0.0356706	TRUE
Q96P71-1	Q96P71	N-terminal EF-hand calcium-binding protein 3 [OS=Homo sapiens]	NECAB3	N-terminal EF-hand calcium binding protein 3(NECAB3)	0.001	7.534	8	2	3	2	1	396	44.3	6.24	9.72	2	0	77.1	60.1	53.2	76.6	67.9	63.8	77.1	58.626	52.9851	71.6962	65.6237	65.8369		74.3981	0.835033	0.147449	0.798555	0.140028	TRUE
Q9NQ29	Q9NQ29	putative RNA-binding protein Luc7-like 1 [OS=Homo sapiens]	LUC7L	LUC7 like(LUC7L)	0	122.492	44	15	75	9	1	371	43.7	9.92	259.17	15	0	3216.4	2720.4	2481.5	3341.2	2735.4	2476.1	3216.4	2653.68	2471.48	3127.3	2643.7	2555.15		3171.85	0.835061	0.102595	0.792381	0.109716	TRUE
P28288	P28288	ATP-binding cassette sub-family D member 3 [OS=Homo sapiens]	ABCD3	ATP binding cassette subfamily D member 3(ABCD3)	0	92.679	34	19	48	17	1	659	75.4	9.36	144.93	19	1	4749.2	4098.8	4164.6	5160.2	4140.4	4174	4749.2	3998.28	4147.78	4829.85	4001.59	4307.26		4789.53	0.835142	0.126996	0.882659	0.405006	TRUE
Q9UNN5-1	Q9UNN5	fas-associated factor 1 [OS=Homo sapiens]	FAF1	Fas associated factor 1(FAF1)	0	251.095	41	27	159	27	1	650	73.9	4.88	574.19	27	0	18712.7	16687.5	12297.5	18611.4	17989.5	11799.6	18712.7	16278.2	12247.8	17419.9	17386.4	12176.3		18066.3	0.931696	0.451548	0.675958	0.00836395	TRUE
Q15047	Q15047	Histone-lysine N-methyltransferase SETDB1 [OS=Homo sapiens]	SETDB1	SET domain bifurcated 1(SETDB1)	0	127.799	24	26	37	26	1	1291	143.1	6.02	134.73	26	0	3849.5	3260.2	3301.6	4008.3	3278.3	3147.1	3849.5	3180.24	3288.26	3751.7	3168.4	3247.57		3800.6	0.835216	0.0643646	0.859843	0.333545	TRUE
Q86TA1	Q86TA1	MOB kinase activator 3B [OS=Homo sapiens]	MOB3B	MOB kinase activator 3B(MOB3B)	0	13.482	14	3	6	3	1	216	25.4	8.43	18.85	3	0	925.9	774.6	840.6	966.3	800	818.3	925.9	755.603	837.204	904.439	773.18	844.425		915.17	0.835246	0.166567	0.918753	0.555005	TRUE
Q8NFI4	Q8NFI4	Putative protein FAM10A5 [OS=Homo sapiens]	ST13P5	suppression of tumorigenicity 13 (colon carcinoma) (Hsp70 interacting protein) pseudogene 5(ST13P5)	0	86.826	31	12	128	1	1	369	41.4	5.05	372.41	12	0	49.7	45.6	54.1	58.8	44.5	54.8	49.7	44.4816	53.8815	55.0357	43.0081	56.5495		52.3679	0.835338	0.148165	1.05438	0.977002	FALSE
Q03393	Q03393	6-pyruvoyl tetrahydrobiopterin synthase [OS=Homo sapiens]	PTS	6-pyruvoyltetrahydropterin synthase(PTS)	0.006	5.135	10	1	2	1	1	145	16.4	6.68	8.58	1	0	143.1	117.3	198.5	129.9	110.4	183.2	143.1	114.423	197.698	121.584	106.699	189.049		132.342	0.835419	0.196503	1.46116	0.0756082	FALSE
Q9NP61-1	Q9NP61	ADP-ribosylation factor GTPase-activating protein 3 [OS=Homo sapiens]	ARFGAP3	ADP ribosylation factor GTPase activating protein 3(ARFGAP3)	0	94.66	38	17	41	17	1	516	56.9	7.36	125.05	17	0	6048.8	5295.5	6757.8	6520.9	5161.8	6445.1	6048.8	5165.63	6730.5	6103.44	4988.75	6650.87		6076.12	0.835597	0.0949466	1.10114	0.3963	FALSE
P20585	P20585	DNA mismatch repair protein MSH3 [OS=Homo sapiens]	MSH3	mutS homolog 3(MSH3)	0	200.805	36	35	77	35	1	1137	127.3	8.02	267.03	35	0	9169.7	8019.8	7686.9	9942	7881.6	7429.2	9169.7	7823.11	7655.85	9305.53	7617.37	7666.38		9237.62	0.83574	0.0611991	0.829339	0.219675	TRUE
Q9NTJ3-1	Q9NTJ3	Structural maintenance of chromosomes protein 4 [OS=Homo sapiens]	SMC4	structural maintenance of chromosomes 4(SMC4)	0	583.292	59	78	243	78	1	1288	147.1	6.79	905.97	78	0	36824.6	31811	33285.3	39275.8	31525.3	32136.9	36824.6	31030.8	33150.8	36761.4	30468.4	33162.9		36793	0.835746	0.0296236	0.901173	0.459364	TRUE
Q15021	Q15021	condensin complex subunit 1 [OS=Homo sapiens]	NCAPD2	non-SMC condensin I complex subunit D2(NCAPD2)	0	445.08	48	57	164	57	1	1401	157.1	6.61	611.98	57	0	21361.3	18184.5	18708.2	22514.1	18340.5	17650.7	21361.3	17738.5	18632.6	21072.8	17725.6	18214.2		21217	0.835747	0.0296243	0.868331	0.2811	TRUE
Q8N5I2	Q8N5I2	arrestin domain-containing protein 1 [OS=Homo sapiens]	ARRDC1	arrestin domain containing 1(ARRDC1)	0	16.531	9	3	8	3	1	433	46	7.02	23.1	3	0	288.5	268.2	262.4	317.8	236.1	273.4	288.5	261.622	261.34	297.455	228.185	282.129		292.978	0.835912	0.110181	0.927492	0.509486	TRUE
O43592	O43592	Exportin-T [OS=Homo sapiens]	XPOT	exportin for tRNA(XPOT)	0	222.963	39	32	97	32	1	962	109.9	5.39	349.04	32	0	15437.4	13005.3	13311	15916.9	13115	12882.7	15437.4	12686.3	13257.2	14897.9	12675.3	13294		15167.7	0.836044	0.0585673	0.875257	0.436904	TRUE
Q9NXU5	Q9NXU5	ADP-ribosylation factor-like protein 15 [OS=Homo sapiens]	ARL15	ADP ribosylation factor like GTPase 15(ARL15)	0	42.247	46	6	13	6	1	204	22.9	5.63	50.74	6	0	1317.3	1063.7	1170.1	1282.4	1104.3	1039.4	1317.3	1037.61	1165.37	1200.3	1067.28	1072.58		1258.8	0.836069	0.121084	0.888924	0.415056	TRUE
Q9H6R0-1	Q9H6R0	Putative ATP-dependent RNA helicase DHX33 [OS=Homo sapiens]	DHX33	DEAH-box helicase 33(DHX33)	0	79.991	25	17	31	17	1	707	78.8	8.91	105.65	17	0	2765.4	2453.7	2371.4	3092	2420.4	2338.5	2765.4	2393.52	2361.82	2894.06	2339.26	2413.16		2829.73	0.83626	0.105017	0.843717	0.222158	TRUE
Q9NX00	Q9NX00	Transmembrane protein 160 [OS=Homo sapiens]	TMEM160	transmembrane protein 160(TMEM160)	0.001	9.812	9	2	4	2	1	188	19.6	8.03	11.65	2	0	130.1	119.5	121.2	165.6	126.1	120.1	130.1	116.569	120.71	154.999	121.873	123.934		142.549	0.836348	0.198731	0.858105	0.291004	TRUE
P48509	P48509	CD151 antigen [OS=Homo sapiens]	CD151	CD151 molecule (Raph blood group)(CD151)	0.001	8.575	11	3	7	3	1	253	28.3	7.47	14.87	3	0	306	329.4	372.8	450.2	297	339.8	306	321.321	371.294	421.379	287.043	350.648		363.69	0.836379	0.199382	0.992526	0.888408	TRUE
Q8WVV9	Q8WVV9	Heterogeneous nuclear ribonucleoprotein L-like [OS=Homo sapiens]	HNRNPLL	heterogeneous nuclear ribonucleoprotein L like(HNRNPLL)	0	209.926	69	28	95	27	1	542	60	7.72	351.5	28	0	8471	7601.3	5766.8	9017.6	7570.1	5511.9	8471	7414.88	5743.5	8440.31	7316.31	5687.87		8455.66	0.871085	0.218903	0.67596	0.019646	TRUE
Q969R2	Q969R2	Oxysterol-binding protein 2 [OS=Homo sapiens]	OSBP2	oxysterol binding protein 2(OSBP2)	0	68.741	21	14	33	12	1	916	101.2	6.54	98.29	14	0	1922.1	1745.1	1978.7	2214.4	1696.1	1930.4	1922.1	1702.3	1970.71	2072.64	1639.24	1992.03		1997.37	0.836485	0.140086	0.991989	0.91458	TRUE
Q9NYP9	Q9NYP9	protein Mis18-alpha [OS=Homo sapiens]	MIS18A	MIS18 kinetochore protein A(MIS18A)	0	55.723	55	10	16	10	1	233	25.8	5.2	57.34	10	0	2690.7	2284.1	2278.5	2964.6	2426.1	2193.5	2690.7	2228.08	2269.3	2774.81	2344.77	2263.53		2732.76	0.836673	0.105861	0.82935	0.184582	TRUE
O00635	O00635	E3 ubiquitin-protein ligase TRIM38 [OS=Homo sapiens]	TRIM38	tripartite motif containing 38(TRIM38)	0	19.056	15	6	8	6	1	465	53.4	7.02	19.63	6	0	723.7	625.7	626.5	770.1	619.3	566.2	723.7	610.355	623.969	720.8	598.538	584.276		722.25	0.836894	0.170731	0.836446	0.285175	TRUE
Q9UJX2-1	Q9UJX2	cell division cycle protein 23 homolog [OS=Homo sapiens]	CDC23	cell division cycle 23(CDC23)	0	160.871	49	26	78	25	1	597	68.8	7.02	264.22	26	1	9391.2	8032.1	8935.8	10104.8	8218	8816.8	9391.2	7835.11	8899.7	9457.91	7942.49	9098.28		9424.56	0.837048	0.063296	0.954845	0.872182	TRUE
O15240	O15240	Neurosecretory protein VGF [OS=Homo sapiens]	VGF	VGF nerve growth factor inducible(VGF)	0	19.446	7	3	4	3	1	615	67.2	4.78	16.81	3	0	192.8	160.4	181	206.4	172.5	177.7	192.8	156.466	180.269	193.187	166.717	183.373		192.993	0.837291	0.113225	0.94211	0.566849	TRUE
Q92830-1	Q92830	Histone acetyltransferase KAT2A [OS=Homo sapiens]	KAT2A	lysine acetyltransferase 2A(KAT2A)	0	28.146	11	9	10	8	1	837	93.9	9.04	31.01	9	0	1394.8	1067.6	945.6	1517.1	1057.3	931.6	1394.8	1041.42	941.78	1419.98	1021.85	961.342		1407.39	0.733014	0.00956916	0.676118	0.0204171	TRUE
Q14168-4	Q14168	Isoform 4 of MAGUK p55 subfamily member 2 [OS=Homo sapiens]	MPP2	membrane palmitoylated protein 2(MPP2)	0.001	8.609	4	2	2	2	1	597	66.8	6.65	6.26	2	0	137.2	88	90.1	135.7	82.5	86.4	137.2	85.8418	89.736	127.013	79.7342	89.1584		132.106	0.626677	0.00634351	0.677085	0.0334033	TRUE
O75940	O75940	Survival of motor neuron-related-splicing factor 30 [OS=Homo sapiens]	SMNDC1	survival motor neuron domain containing 1(SMNDC1)	0	80.711	47	9	70	9	1	238	26.7	7.24	271.06	9	0	4927	4034.7	4550.3	5112	4342.1	4170.7	4927	3935.75	4531.92	4784.74	4196.53	4303.85		4855.87	0.837366	0.132117	0.909803	0.54365	TRUE
Q9Y4E6-1	Q9Y4E6	WD repeat-containing protein 7 [OS=Homo sapiens]	WDR7	WD repeat domain 7(WDR7)	0	152.788	26	28	61	28	1	1490	163.7	6.92	206.03	28	0	5175.8	4362.9	5066.2	5392.3	4454	4913.4	5175.8	4255.9	5045.73	5047.1	4304.68	5070.26		5111.45	0.837393	0.13218	0.989543	0.970773	TRUE
P84243	P84243	histone H3.3 [OS=Homo sapiens]	H3F3A	H3 histone family member 3A(H3F3A)	0	39.379	48	6	62	1	1	136	15.3	11.27	170.68	6	0	59	47.7	59.1	54.9	47.5	67.4	59	46.5301	58.8613	51.3854	45.9076	69.5518		55.1927	0.837409	0.153085	1.16332	0.61447	FALSE
Q14781-1	Q14781	Chromobox protein homolog 2 [OS=Homo sapiens]	CBX2	chromobox 2(CBX2)	0	56.727	26	11	20	11	1	532	56	10.01	61.79	11	0	1878.4	1618.5	1506.2	2032	1642	1465.6	1878.4	1578.81	1500.12	1901.92	1586.95	1512.39		1890.16	0.837432	0.142313	0.796893	0.159788	TRUE
Q9H0Y0	Q9H0Y0	Ubiquitin-like-conjugating enzyme ATG10 [OS=Homo sapiens]	ATG10	autophagy related 10(ATG10)	0.001	8.583	13	3	5	3	1	220	25.3	5.55	14.65	3	0	963	826.2	931.7	1010.9	820.5	982.3	963	805.937	927.936	946.184	792.993	1013.66		954.592	0.837494	0.172267	1.01698	0.984641	FALSE
Q8IY37	Q8IY37	Probable ATP-dependent RNA helicase DHX37 [OS=Homo sapiens]	dhx37	DEAH-box helicase 37(DHX37)	0	204.623	34	30	81	30	1	1157	129.5	8.1	296.24	30	0	10700.4	8951	9700.7	11193.6	9320.6	9167.3	10700.4	8731.47	9661.51	10477	9008.13	9459.97		10588.7	0.837666	0.0643084	0.902919	0.547083	TRUE
Q5TDH0-3	Q5TDH0	Isoform 3 of Protein DDI1 homolog 2 [OS=Homo sapiens]	DDI2	DNA damage inducible 1 homolog 2(DDI2)	0	172.74	58	19	74	19	1	419	46.5	5.1	310.77	19	0	8807	7613.5	8545.8	9405.3	7581	8387.5	8807	7426.78	8511.28	8803.19	7326.85	8655.28		8805.1	0.837789	0.115614	0.974808	0.957141	TRUE
Q9P2N5	Q9P2N5	RNA-binding protein 27 [OS=Homo sapiens]	RBM27	RNA binding motif protein 27(RBM27)	0	207.797	33	28	87	26	1	1060	118.6	9.19	281.1	28	0	10566.6	9234.5	9598.2	11536.1	9216.8	9265.2	10566.6	9008.02	9559.43	10797.6	8907.81	9561		10682.1	0.838592	0.0658476	0.894976	0.503089	TRUE
Q16644	Q16644	MAP kinase-activated protein kinase 3 [OS=Homo sapiens]	MAPKAPK3	mitogen-activated protein kinase-activated protein kinase 3(MAPKAPK3)	0	57.704	30	9	45	8	1	382	43	7.28	169.13	9	0	3109.1	2641.6	2906.4	3308.4	2718.7	2798.3	3109.1	2576.81	2894.66	3096.6	2627.56	2887.64		3102.85	0.838643	0.109962	0.931772	0.567785	TRUE
O15294	O15294	UDP-N-acetylglucosamine--peptide N-acetylglucosaminyltransferase 110 kDa subunit [OS=Homo sapiens]	OGT	O-linked N-acetylglucosamine (GlcNAc) transferase(OGT)	0	193.291	36	28	88	28	1	1046	116.9	6.7	301.62	28	0	12272.6	10579.2	10579.8	12958.7	10497.2	10299.2	12272.6	10319.7	10537.1	12129.1	10145.3	10628		12200.9	0.838672	0.0659818	0.86736	0.365834	TRUE
Q49AM3-1	Q49AM3	tetratricopeptide repeat protein 31 [OS=Homo sapiens]	TTC31	tetratricopeptide repeat domain 31(TTC31)	0	25.524	15	6	7	6	1	519	57.1	8.22	19.82	6	0	500.1	431.1	441.7	536	434.7	426.2	500.1	420.527	439.916	501.686	420.127	439.807		500.893	0.839155	0.182414	0.878154	0.380746	TRUE
Q02386	Q02386	Zinc finger protein 45 [OS=Homo sapiens]	ZNF45	zinc finger protein 45(ZNF45)	0.001	8.339	11	3	6	1	1	682	78.2	8.66	3.74	3	0	26.7	23.7	23.3	21.7	16.9	24.7	26.7	23.1187	23.2059	20.3108	16.3334	25.4886		23.5054	0.839215	0.157478	1.03581	0.943586	FALSE
Q13033	Q13033	Striatin-3 [OS=Homo sapiens]	STRN3	striatin 3(STRN3)	0	130.475	31	19	60	2	1	797	87.2	5.36	210.71	19	17	4841.6	3976.6	4529.8	4870.9	4149.7	4403.3	4841.6	3879.07	4511.5	4559.07	4010.58	4543.88		4700.34	0.839265	0.136614	0.963269	0.870269	TRUE
Q8TAT5	Q8TAT5	endonuclease 8-like 3 [OS=Homo sapiens]	NEIL3	nei like DNA glycosylase 3(NEIL3)	0.002	7.064	4	2	3	2	1	605	67.7	9	8.18	2	0	337.5	306.4	220.2	343.2	329.2	219.7	337.5	298.885	219.31	321.229	318.164	226.714		329.365	0.936727	0.61682	0.677099	0.0367836	TRUE
Q99956	Q99956	Dual specificity protein phosphatase 9 [OS=Homo sapiens]	DUSP9	dual specificity phosphatase 9(DUSP9)	0	29.66	26	7	7	7	1	384	41.8	6.11	26.83	7	0	829.2	709.5	647.4	850.9	695.9	666.3	829.2	692.099	644.785	796.427	672.57	687.572		812.814	0.839473	0.177403	0.819596	0.243322	TRUE
Q05639	Q05639	Elongation factor 1-alpha 2 [OS=Homo sapiens]	EEF1A2	eukaryotic translation elongation factor 1 alpha 2(EEF1A2)	0	300.359	71	25	1240	10	1	463	50.4	9.03	3705.92	25	0	5123.8	4515.2	4595.3	5769	4584.2	4817.2	5123.8	4404.46	4576.74	5399.68	4430.52	4970.99		5261.74	0.839549	0.137298	0.907279	0.529829	TRUE
Q7L2E3-2	Q7L2E3	Isoform 2 of Putative ATP-dependent RNA helicase DHX30 [OS=Homo sapiens]	DHX30	DExH-box helicase 30(DHX30)	0	345.958	61	59	159	59	1	1222	136	8.6	537.54	59	0	20992.4	17714.2	19283.1	21906.7	18189.2	18243.2	20992.4	17279.8	19205.2	20504.3	17579.4	18825.6		20748.3	0.840047	0.0339349	0.916479	0.560308	TRUE
Q8TCG1	Q8TCG1	Protein CIP2A [OS=Homo sapiens]	KIAA1524	KIAA1524(KIAA1524)	0	143.2	29	29	60	29	1	905	102.1	6.23	190.97	29	0	7048.7	6118.4	5960.7	7614.4	6147.8	5697.5	7048.7	5968.34	5936.62	7126.94	5941.7	5879.4		7087.82	0.840177	0.121433	0.833544	0.257989	TRUE
P02750	P02750	Leucine-rich alpha-2-glycoprotein [OS=Homo sapiens]	LRG1	leucine rich alpha-2-glycoprotein 1(LRG1)	0.001	9.633	7	2	6	2	1	347	38.2	6.95	17.08	2	0	260.7	233.1	303.1	281.8	220.8	289.3	260.7	227.383	301.876	263.76	213.398	298.536		262.23	0.840448	0.120445	1.14482	0.585891	FALSE
Q8NB15-1	Q8NB15	Zinc finger protein 511 [OS=Homo sapiens]	ZNF511	zinc finger protein 511(ZNF511)	0	16.412	20	3	4	3	1	262	29.4	6.79	17.88	3	0	401.3	353.4	334.9	428.2	340.9	329.4	401.3	344.733	333.547	400.787	329.471	339.916		401.044	0.840562	0.211052	0.839638	0.278172	TRUE
Q13608	Q13608	Peroxisome assembly factor 2 [OS=Homo sapiens]	PEX6	peroxisomal biogenesis factor 6(PEX6)	0	132.809	35	24	43	24	1	980	104	6.34	167.71	24	0	4718	4146	4320	5053.3	4032.7	4330.6	4718	4044.32	4302.55	4729.8	3897.5	4468.86		4723.9	0.8406	0.139848	0.928408	0.650685	TRUE
Q8N129	Q8N129	Protein canopy homolog 4 [OS=Homo sapiens]	CNPY4	canopy FGF signaling regulator 4(CNPY4)	0	15.693	19	4	5	4	1	248	28.3	4.64	17.78	4	0	310.2	260	283.7	332.2	278	285	310.2	253.623	282.554	310.933	268.68	294.099		310.567	0.840888	0.211982	0.928388	0.591694	TRUE
Q5TA31	Q5TA31	E3 ubiquitin-protein ligase RNF187 [OS=Homo sapiens]	RNF187	ring finger protein 187(RNF187)	0	44.979	50	9	11	9	1	235	26.2	5.95	43.8	9	0	973.9	860.6	1316.2	1025.9	814.9	1212.2	973.9	839.494	1310.88	960.224	787.581	1250.9		967.062	0.841246	0.132268	1.32452	0.0799964	FALSE
Q9UGP5	Q9UGP5	DNA polymerase lambda [OS=Homo sapiens]	POLL	DNA polymerase lambda(POLL)	0	28.083	14	7	13	7	1	575	63.4	7.87	34.38	7	0	550.2	467.7	420.7	571.8	472.8	393.6	550.2	456.23	419	535.194	456.949	406.166		542.697	0.841334	0.188215	0.760246	0.110194	TRUE
Q9P209	Q9P209	Centrosomal protein of 72 kDa [OS=Homo sapiens]	CEP72	centrosomal protein 72(CEP72)	0	13.364	10	4	5	4	1	647	71.7	6.52	9.57	4	0	682.8	606.3	448	669.5	614.9	427.9	682.8	591.43	446.19	626.64	594.286	441.561		654.72	0.905514	0.423176	0.677963	0.0356994	TRUE
Q3SY56	Q3SY56	Transcription factor Sp6 [OS=Homo sapiens]	SP6	Sp6 transcription factor(SP6)	0	46.345	24	6	14	6	1	376	39.8	7.25	63.96	6	0	1549.2	1346.9	1894.6	1645.5	1330.7	1852.6	1549.2	1313.87	1886.95	1540.16	1286.09	1911.75		1544.68	0.841584	0.120577	1.22961	0.223268	FALSE
Q13795	Q13795	ADP-ribosylation factor-related protein 1 [OS=Homo sapiens]	ARFRP1	ADP ribosylation factor related protein 1(ARFRP1)	0	48.431	48	8	15	8	1	201	22.6	7.56	58.12	8	0	2312.3	2099	2539.9	2551.4	1974.7	2674.3	2312.3	2047.52	2529.64	2388.06	1908.5	2759.68		2350.18	0.841641	0.121984	1.1253	0.456491	FALSE
Q5RL73-2	Q5RL73	Isoform 2 of RNA-binding protein 48 [OS=Homo sapiens]	RBM48	RNA binding motif protein 48(RBM48)	0.001	9.786	7	3	6	3	1	376	43.1	9.09	15.37	3	0	512.4	412.8	362.5	579.6	422.5	343.2	512.4	402.676	361.036	542.495	408.336	354.157		527.448	0.768808	0.0577232	0.677975	0.035706	TRUE
Q86WN1-1	Q86WN1	F-BAR and double SH3 domains protein 1 [OS=Homo sapiens]	FCHSD1	FCH and double SH3 domains 1(FCHSD1)	0	46.269	16	8	14	8	1	690	76.9	5.34	44.88	8	0	1710.3	1477.3	1855.5	1853	1509	1854.8	1710.3	1441.07	1848	1734.37	1458.41	1914.02		1722.34	0.841728	0.152757	1.09213	0.624894	FALSE
Q14159	Q14159	DNA repair-scaffolding protein [OS=Homo sapiens]	SPIDR	scaffolding protein involved in DNA repair(SPIDR)	0	17.448	6	5	8	5	1	915	100.3	6.62	15.87	5	0	294.4	243.7	242.3	271.9	232.1	254.7	294.4	237.723	241.321	254.493	224.319	262.832		274.447	0.84177	0.123575	0.918489	0.475736	TRUE
Q96DY7	Q96DY7	mdm2-binding protein [OS=Homo sapiens]	MTBP	MDM2 binding protein(MTBP)	0	12.798	4	3	4	3	1	904	102.1	7.77	13.03	3	0	408.1	291.3	286.8	441.4	295.4	262.9	408.1	284.156	285.641	413.142	285.497	271.293		410.621	0.693647	0.0165317	0.678161	0.0373793	TRUE
Q01196-1	Q01196	Runt-related transcription factor 1 [OS=Homo sapiens]	RUNX1	runt related transcription factor 1(RUNX1)	0	71.443	34	13	31	13	1	453	48.7	9.35	89.97	13	0	3665.2	3125.7	3141.5	3803.6	3139.3	2952.8	3665.2	3049.04	3128.81	3560.1	3034.06	3047.07		3612.65	0.841916	0.0753497	0.854757	0.317342	TRUE
Q8N4L2	Q8N4L2	Type 2 phosphatidylinositol 4,5-bisphosphate 4-phosphatase [OS=Homo sapiens]	TMEM55A	transmembrane protein 55A(TMEM55A)	0	43.975	38	6	33	5	1	257	28.1	8.68	100.11	6	1	1962.9	1823.1	1619.1	2220.2	1680.4	1660.2	1962.9	1778.39	1612.56	2078.07	1624.06	1713.2		2020.48	0.84199	0.153411	0.823012	0.21797	TRUE
Q15185	Q15185	Prostaglandin E synthase 3 [OS=Homo sapiens]	PTGES3	prostaglandin E synthase 3(PTGES3)	0	92.362	61	11	129	11	1	160	18.7	4.54	365.92	11	0	17999.8	15914.5	17806.8	19375.9	15429.4	16994	17999.8	15524.2	17734.9	18135.5	14912.1	17536.5		18067.6	0.842288	0.0692019	0.976093	0.899452	TRUE
P48729-3	P48729	Isoform 3 of Casein kinase I isoform alpha [OS=Homo sapiens]	CSNK1A1	casein kinase 1 alpha 1(CSNK1A1)	0	127.317	62	20	72	2	1	325	37.5	9.48	202.33	20	0	49.8	42.4	34.4	50.5	44.2	30.6	49.8	41.3601	34.261	47.2671	42.7182	31.5769		48.5335	0.866188	0.234863	0.678273	0.0286743	TRUE
Q9NWS1-1	Q9NWS1	PCNA-interacting partner [OS=Homo sapiens]	PARPBP	PARP1 binding protein(PARPBP)	0	27.555	13	6	9	6	1	579	65	8.79	23.48	6	0	538.1	422.6	353.7	555.8	423.3	354.6	538.1	412.236	352.271	520.219	409.109	365.921		529.159	0.776084	0.0658547	0.678616	0.036052	TRUE
Q9UHR5-1	Q9UHR5	SAP30-binding protein [OS=Homo sapiens]	SAP30BP	SAP30 binding protein(SAP30BP)	0	84.081	42	13	28	13	1	308	33.9	4.84	95.47	13	0	6892.9	5720.6	5440.6	7021.4	5962.2	5402.9	6892.9	5580.3	5418.62	6571.9	5762.32	5575.39		6732.4	0.84239	0.110337	0.8165	0.172058	TRUE
Q9BW85	Q9BW85	Coiled-coil domain-containing protein 94 [OS=Homo sapiens]	CCDC94	coiled-coil domain containing 94(CCDC94)	0	112.11	47	16	33	16	1	323	37.1	5.92	131.19	16	0	2916.5	2487.6	2573.6	3079	2544.9	2468.7	2916.5	2426.59	2563.2	2881.89	2459.58	2547.52		2899.19	0.842678	0.118753	0.881403	0.345766	TRUE
A6NDB9	A6NDB9	Paralemmin-3 [OS=Homo sapiens]	PALM3	paralemmin 3(PALM3)	0	35.478	18	8	9	8	1	673	71.7	4.53	29.46	8	0	331.4	275.5	357.4	338.2	286.9	385.4	331.4	268.743	355.956	316.549	277.282	397.704		323.975	0.842697	0.217197	1.16315	0.500656	FALSE
Q13015	Q13015	protein AF1q [OS=Homo sapiens]	MLLT11	myeloid/lymphoid or mixed-lineage leukemia; translocated to, 11(MLLT11)	0	35.028	89	5	13	5	1	90	10.1	4.54	37.85	5	0	412.9	351.7	534.6	453.5	375.2	502.8	412.9	343.074	532.44	424.468	362.622	518.852		418.684	0.842755	0.217365	1.25547	0.274016	FALSE
O43663-1	O43663	Protein regulator of cytokinesis 1 [OS=Homo sapiens]	PRC1	protein regulator of cytokinesis 1(PRC1)	0	260.916	68	36	104	3	1	620	71.6	6.68	384.26	36	33	14390.2	13488.4	9559.1	15323.6	13381.9	9679.2	14390.2	13157.6	9520.48	14342.6	12933.3	9988.22		14366.4	0.908051	0.301	0.678969	0.00908303	TRUE
Q9UK45	Q9UK45	U6 snRNA-associated Sm-like protein LSm7 [OS=Homo sapiens]	LSM7	LSM7 homolog, U6 small nuclear RNA and mRNA degradation associated(LSM7)	0	33.677	65	4	23	4	1	103	11.6	5.27	59.64	4	0	2469.1	2262.2	1636.2	2448.4	2385.7	1556.7	2469.1	2206.72	1629.59	2291.66	2305.72	1606.4		2380.38	0.94784	0.598057	0.679721	0.0366328	TRUE
Q9Y619	Q9Y619	mitochondrial ornithine transporter 1 [OS=Homo sapiens]	SLC25A15	solute carrier family 25 member 15(SLC25A15)	0	21.679	26	7	9	7	1	301	32.7	9.13	26.96	7	0	1481.3	1331.3	1455	1650.6	1295.7	1437.5	1481.3	1298.65	1449.12	1544.93	1252.26	1483.39		1513.12	0.842933	0.123695	0.969032	0.79206	TRUE
P26651	P26651	mRNA decay activator protein ZFP36 [OS=Homo sapiens]	ZFP36	ZFP36 ring finger protein(ZFP36)	0.001	11.133	11	4	5	3	1	326	34	8.48	12.32	4	0	302.7	275.9	349.4	359.5	279.1	320	302.7	269.133	347.989	336.486	269.743	330.216		319.593	0.843068	0.218276	1.06105	0.834811	FALSE
O95235	O95235	kinesin-like protein KIF20A [OS=Homo sapiens]	KIF20A	kinesin family member 20A(KIF20A)	0	288.52	58	43	114	43	1	890	100.2	6.92	386.01	43	0	7848.5	7211	5244.6	8213.4	7216.8	5176.2	7848.5	7034.15	5223.41	7687.59	6974.86	5341.45		7768.05	0.901707	0.361204	0.680021	0.0213311	TRUE
Q96Q89-1	Q96Q89	Kinesin-like protein KIF20B [OS=Homo sapiens]	KIF20B	kinesin family member 20B(KIF20B)	0	211.963	27	36	62	36	1	1820	210.5	5.67	216.67	36	0	8350.1	7149.1	6687.4	8630.2	7114.8	6637.4	8350.1	6973.77	6660.38	8077.71	6876.28	6849.3		8213.91	0.843085	0.128829	0.822367	0.223831	TRUE
Q09028	Q09028	Histone-binding protein RBBP4 [OS=Homo sapiens]	RBBP4	RB binding protein 4, chromatin remodeling factor(RBBP4)	0	189.586	68	17	138	10	1	425	47.6	4.89	508.19	17	0	8125.6	6906.7	6696	8586.7	7128.2	6769.9	8125.6	6737.31	6668.95	8037	6889.23	6986.04		8081.3	0.843091	0.128844	0.844851	0.296061	TRUE
P50542-4	P50542	Isoform 4 of Peroxisomal targeting signal 1 receptor [OS=Homo sapiens]	PEX5	peroxisomal biogenesis factor 5(PEX5)	0	108.879	38	16	36	2	1	654	72.2	4.51	115.55	16	15	2792.9	2335.5	2798.8	2811.5	2375.2	2731	2792.9	2278.22	2787.49	2631.51	2295.57	2818.19		2712.21	0.843187	0.125605	1.03342	0.825117	FALSE
Q8NCH0	Q8NCH0	Carbohydrate sulfotransferase 14 [OS=Homo sapiens]	CHST14	carbohydrate sulfotransferase 14(CHST14)	0	18.782	18	6	7	6	1	376	43	9.48	18.19	6	0	692	619.4	564.1	814.3	643.7	579.7	692	604.209	561.821	762.17	622.12	598.207		727.085	0.843319	0.187712	0.797726	0.195712	TRUE
Q969P0	Q969P0	Immunoglobulin superfamily member 8 [OS=Homo sapiens]	IGSF8	immunoglobulin superfamily member 8(IGSF8)	0	15.361	4	3	8	3	1	613	65	8	21.96	3	0	459.4	399.6	575.4	490.7	398.4	543.9	459.4	389.8	573.076	459.286	385.044	561.264		459.343	0.843425	0.219321	1.23474	0.317572	FALSE
Q9UER7-1	Q9UER7	Death domain-associated protein 6 [OS=Homo sapiens]	DAXX	death domain associated protein(DAXX)	0	117.176	34	17	46	17	1	740	81.3	4.87	140.23	17	0	5863.8	5174.7	5407.6	6370	5097.8	5142.4	5863.8	5047.79	5385.75	5962.21	4926.9	5306.58		5913	0.843454	0.112916	0.904137	0.524428	TRUE
P30740	P30740	Leukocyte elastase inhibitor [OS=Homo sapiens]	SERPINB1	serpin family B member 1(SERPINB1)	0	241.196	65	25	132	24	1	379	42.7	6.28	481.94	25	0	15413.7	13481.3	16804.1	16476.6	13313.2	17030	15413.7	13150.7	16736.2	15421.8	12866.9	17573.7		15417.8	0.843753	0.0719142	1.11268	0.266291	FALSE
P98172	P98172	ephrin-B1 [OS=Homo sapiens]	EFNB1	ephrin B1(EFNB1)	0.001	8.821	9	2	4	2	1	346	38	8.94	7.35	2	0	152.8	131.9	173.3	162.8	133.3	167.5	152.8	128.665	172.6	152.378	128.831	172.848		152.589	0.843758	0.217153	1.13195	0.689691	FALSE
Q14CS0	Q14CS0	UBX domain-containing protein 2B [OS=Homo sapiens]	UBXN2B	UBX domain protein 2B(UBXN2B)	0.001	10.099	11	2	2	2	1	331	37.1	5.64	9.73	2	0	214.8	183.6	297.2	235.9	195	283.8	214.8	179.097	295.999	220.798	188.463	292.861		217.799	0.843805	0.128515	1.35184	0.108558	FALSE
Q9BVJ7	Q9BVJ7	Dual specificity protein phosphatase 23 [OS=Homo sapiens]	DUSP23	dual specificity phosphatase 23(DUSP23)	0	35.129	54	7	12	7	1	150	16.6	8.21	48.3	7	0	1557.8	1338.5	1248.1	1598.8	1315.7	1279	1557.8	1305.67	1243.06	1496.45	1271.59	1319.83		1527.12	0.843829	0.1258	0.839123	0.239988	TRUE
Q1MSJ5-3	Q1MSJ5	Centrosome and spindle pole-associated protein 1 [OS=Homo sapiens]	CSPP1	centrosome and spindle pole associated protein 1(CSPP1)	0	106.778	22	21	35	21	1	1256	145.4	6.8	107.98	21	0	3032.9	2597.2	2564.9	3047.9	2517.8	2522.1	3032.9	2533.5	2554.54	2852.78	2433.39	2602.62		2942.84	0.843895	0.12151	0.876221	0.326565	TRUE
P55160	P55160	Nck-associated protein 1-like [OS=Homo sapiens]	NCKAP1L	NCK associated protein 1 like(NCKAP1L)	0	22.776	5	5	13	4	1	1127	128.1	6.86	33.68	5	0	396.9	351.9	399.7	423.2	337.3	365.8	396.9	343.27	398.085	396.108	325.992	377.478		396.504	0.843954	0.220872	0.978003	0.818092	TRUE
Q16658	Q16658	Fascin [OS=Homo sapiens]	FSCN1	fascin actin-bundling protein 1(FSCN1)	0	367.683	67	32	419	32	1	493	54.5	7.24	1429.58	32	0	35101.8	30381.3	41841.2	37577.7	30723.2	39671.9	35101.8	29636.2	41672.2	35172	29693.2	40938.5		35136.9	0.84426	0.0386669	1.17555	0.195956	FALSE
P23025	P23025	DNA repair protein complementing XP-A cells [OS=Homo sapiens]	XPA	XPA, DNA damage recognition and repair factor(XPA)	0	27.12	23	4	5	4	1	273	31.3	6.73	23.56	4	0	1084	932.4	776.4	1070.6	881.5	708.2	1084	909.533	773.264	1002.06	851.948	730.81		1043.03	0.844405	0.139476	0.721011	0.0666992	TRUE
P62324	P62324	Protein BTG1 [OS=Homo sapiens]	BTG1	BTG anti-proliferation factor 1(BTG1)	0.001	9.208	16	3	5	3	1	171	19.2	8.18	12.84	3	0	688.9	522.8	586	629.1	589	585.6	688.9	509.978	583.633	588.826	569.254	604.296		638.863	0.84465	0.197306	0.929721	0.574605	TRUE
P52209	P52209	6-phosphogluconate dehydrogenase, decarboxylating [OS=Homo sapiens]	PGD	phosphogluconate dehydrogenase(PGD)	0	327.081	73	33	442	33	1	483	53.1	7.23	1394	33	0	38129.2	33853.6	35422.2	42272.1	33739	34584.1	38129.2	33023.3	35279.1	39565.9	32607.9	35688.2		38847.6	0.844728	0.0392254	0.913408	0.539223	TRUE
Q13535	Q13535	serine/threonine-protein kinase ATR [OS=Homo sapiens]	ATR	ATR serine/threonine kinase(ATR)	0	143.136	17	37	57	37	1	2644	301.2	7.43	167.08	37	0	6092.1	5301.9	4860.4	6483.7	5278.2	4778.7	6092.1	5171.87	4840.77	6068.63	5101.25	4931.26		6080.36	0.844778	0.116194	0.803573	0.140706	TRUE
Q9UQ35	Q9UQ35	serine/arginine repetitive matrix protein 2 [OS=Homo sapiens]	SRRM2	serine/arginine repetitive matrix 2(SRRM2)	0	609.813	33	68	381	62	1	2752	299.4	12.06	1315.41	68	6	29896.8	26134.6	27913.7	32167.2	26077.4	27059.5	29896.8	25493.6	27800.9	30107.9	25203.2	27923.4		30002.4	0.84488	0.0394087	0.928666	0.647689	TRUE
Q9H4L7-2	Q9H4L7	Isoform 2 of SWI/SNF-related matrix-associated actin-dependent regulator of chromatin subfamily A containing DEAD/H box 1 [OS=Homo sapiens]	SMARCAD1	SWI/SNF-related, matrix-associated actin-dependent regulator of chromatin, subfamily a, containing DEAD/H box 1(SMARCAD1)	0	196.015	41	32	76	32	1	1028	117.5	5.55	259.05	32	0	10873.9	9044.8	9061.7	11293.9	9618.8	8513.9	10873.9	8822.97	9025.09	10570.9	9296.33	8785.71		10722.4	0.844928	0.0772191	0.830543	0.223541	TRUE
Q2NKX8	Q2NKX8	Dna excision repair protein ercc-6-like [OS=Homo sapiens]	ercc6l	ERCC excision repair 6 like, spindle assembly checkpoint helicase(ERCC6L)	0	226.23	44	40	62	40	1	1250	141	5.31	226.74	40	0	7996.4	6853.5	8011.8	8265.8	6838	7485.9	7996.4	6685.42	7979.43	7736.64	6608.76	7724.89		7866.52	0.844984	0.133844	0.998175	0.915591	TRUE
Q9H3R0	Q9H3R0	Lysine-specific demethylase 4C [OS=Homo sapiens]	KDM4C	lysine demethylase 4C(KDM4C)	0	35.865	14	11	13	9	1	1056	119.9	6.46	36.12	11	0	961	838.2	711.5	1002.4	814.7	693	961	817.643	708.626	938.228	787.387	715.125		949.614	0.845096	0.192621	0.749647	0.115633	TRUE
Q9NR30-1	Q9NR30	Nucleolar RNA helicase 2 [OS=Homo sapiens]	DDX21	DExD-box helicase 21(DDX21)	0	506.498	63	55	327	52	1	783	87.3	9.28	1141.62	55	3	38965.2	34307.8	32836.5	43158.5	34769.1	31127.2	38965.2	33466.4	32703.8	40395.6	33603.5	32121		39680.4	0.845126	0.0397062	0.816837	0.107889	TRUE
P28749-1	P28749	Retinoblastoma-like protein 1 [OS=Homo sapiens]	RBL1	RB transcriptional corepressor like 1(RBL1)	0	38.552	10	9	14	9	1	1068	120.8	7.5	40.62	9	0	1942.7	1670	2388.2	2007.4	1656.7	2231.3	1942.7	1629.04	2378.55	1878.89	1601.16	2302.54		1910.8	0.845251	0.161747	1.22491	0.207102	FALSE
Q9NRW7	Q9NRW7	Vacuolar protein sorting-associated protein 45 [OS=Homo sapiens]	VPS45	vacuolar protein sorting 45 homolog(VPS45)	0	114.801	38	22	42	22	1	570	65	8.24	144.83	22	0	7531.3	6547.3	5903.8	8058.9	6577.4	5725.3	7531.3	6386.73	5879.95	7542.99	6356.89	5908.09		7537.14	0.845388	0.134929	0.781996	0.127432	TRUE
Q92989-1	Q92989	Polyribonucleotide 5'-hydroxyl-kinase Clp1 [OS=Homo sapiens]	CLP1	cleavage and polyadenylation factor I subunit 1(CLP1)	0	79.252	29	12	50	12	1	425	47.6	6.62	156.39	12	0	6473.8	5527.8	5536.1	6878.1	5714.8	5353.8	6473.8	5392.23	5513.74	6437.78	5523.21	5524.72		6455.79	0.8454	0.117756	0.854927	0.295593	TRUE
Q9BV29-2	Q9BV29	Isoform 2 of Uncharacterized protein C15orf57 [OS=Homo sapiens]	c15orf57	chromosome 15 open reading frame 57(C15orf57)	0	51.392	72	6	12	3	1	194	21.7	4.61	53.1	6	2	835.5	792.5	832.9	1116.2	845	757.2	835.5	773.064	829.535	1044.74	816.672	781.374		940.122	0.845495	0.193735	0.856756	0.34176	TRUE
Q9H0I2-1	Q9H0I2	Enkurin domain-containing protein 1 [OS=Homo sapiens]	ENKD1	enkurin domain containing 1(ENKD1)	0.001	8.842	11	3	3	3	1	346	38.7	9.8	6.34	3	0	413.7	353.4	305.6	406.1	337.9	309.9	413.7	344.733	304.365	380.102	326.572	319.794		396.901	0.845683	0.226001	0.786291	0.1574	TRUE
Q75N03	Q75N03	E3 ubiquitin-protein ligase Hakai [OS=Homo sapiens]	CBLL1	Cbl proto-oncogene like 1(CBLL1)	0	63.528	30	10	24	1	1	491	54.5	8.29	96.19	10	0	272.3	238.4	208.1	300.1	243.7	215.5	272.3	232.553	207.259	280.888	235.53	222.38		276.594	0.846155	0.13441	0.77666	0.119553	TRUE
Q9HCG8	Q9HCG8	Pre-mRNA-splicing factor CWC22 homolog [OS=Homo sapiens]	CWC22	CWC22 spliceosome associated protein homolog(CWC22)	0	186.152	26	29	89	29	1	908	105.4	7.03	300.88	29	0	12120.1	10724.2	10797.1	13407.4	10786.7	10260.8	12120.1	10461.2	10753.5	12549.1	10425.1	10588.4		12334.6	0.846654	0.0805795	0.865123	0.355841	TRUE
Q9Y2H0	Q9Y2H0	Disks large-associated protein 4 [OS=Homo sapiens]	DLGAP4	DLG associated protein 4(DLGAP4)	0	61.017	19	14	21	14	1	992	107.9	7.08	75.04	14	0	2099.3	1843.3	2786	2286.5	1855	2764.6	2099.3	1798.09	2774.75	2140.12	1792.81	2852.86		2119.71	0.847027	0.166428	1.32745	0.0631315	FALSE
A6NKD9	A6NKD9	Coiled-coil domain-containing protein 85C [OS=Homo sapiens]	CCDC85C	coiled-coil domain containing 85C(CCDC85C)	0	33.655	22	6	10	6	1	419	45.2	6.96	37.53	6	0	421.5	398.5	556.9	538.8	409.4	483.3	421.5	388.727	554.65	504.307	395.675	498.73		462.904	0.847262	0.230762	1.1378	0.57683	FALSE
Q5HYI8	Q5HYI8	Rab-like protein 3 [OS=Homo sapiens]	RABL3	RAB, member of RAS oncogene family like 3(RABL3)	0	48.496	38	8	23	8	1	236	26.4	7.11	73.52	8	0	1292.9	1157.5	1031.8	1474.6	1175.7	1040.8	1292.9	1129.11	1027.63	1380.2	1136.28	1074.03		1336.55	0.84748	0.134665	0.786226	0.122075	TRUE
Q9GZT3-1	Q9GZT3	SRA stem-loop-interacting RNA-binding protein, mitochondrial [OS=Homo sapiens]	SLIRP	SRA stem-loop interacting RNA binding protein(SLIRP)	0	64.632	78	8	42	8	1	109	12.3	10.24	141.23	8	0	6953.4	6308.2	5742.5	7552.8	5929.7	5645.4	6953.4	6153.49	5719.3	7069.28	5730.91	5825.63		7011.34	0.847512	0.140752	0.823304	0.226565	TRUE
Q16621	Q16621	Transcription factor NF-E2 45 kDa subunit [OS=Homo sapiens]	NFE2	nuclear factor, erythroid 2(NFE2)	0	48.886	21	6	30	6	1	373	41.4	4.94	111.13	6	0	1944.3	1631.5	1638.4	1963.1	1670	1579.3	1944.3	1591.49	1631.78	1837.43	1614.01	1629.72		1890.86	0.847629	0.168038	0.862437	0.332279	TRUE
P84101-1	P84101	Small EDRK-rich factor 2 [OS=Homo sapiens]	SERF2	small EDRK-rich factor 2(SERF2)	0.001	10.259	31	2	3	2	1	59	6.9	10.45	10.57	2	0	317.9	290.2	324.9	378.4	296.6	271.9	317.9	283.083	323.587	354.176	286.657	280.581		336.038	0.847731	0.232188	0.898959	0.472685	TRUE
Q9H2A2-1	Q9H2A2	aldehyde dehydrogenase family 8 member A1 [OS=Homo sapiens]	ALDH8A1	aldehyde dehydrogenase 8 family member A1(ALDH8A1)	0.004	5.809	7	2	4	2	1	487	53.4	7.14	5.25	2	0	121.6	81.2	97.3	93.5	101.5	90.7	121.6	79.2085	96.9069	87.5143	98.0972	93.5957		104.557	0.847889	0.227942	0.910997	0.457539	TRUE
O14503	O14503	Class E basic helix-loop-helix protein 40 [OS=Homo sapiens]	BHLHE40	basic helix-loop-helix family member e40(BHLHE40)	0	23.543	12	4	9	4	1	412	45.5	8.1	31.58	4	0	912.7	750	889.6	913.7	794.3	850.6	912.7	731.606	886.006	855.207	767.671	877.756		883.953	0.848052	0.200997	0.997656	0.895319	TRUE
Q13670	Q13670	Putative postmeiotic segregation increased 2-like protein 11 [OS=Homo sapiens]	PMS2P11	PMS1 homolog 2, mismatch repair system component pseudogene 11(PMS2P11)	0.001	9.404	5	1	2	1	1	270	28.5	6.7	7.93	1	0	485.4	384	402.2	469.9	424.4	364.1	485.4	374.582	400.575	439.818	410.172	375.724		462.609	0.848183	0.23357	0.839045	0.276551	TRUE
P79522	P79522	Proline-rich protein 3 [OS=Homo sapiens]	PRR3	proline rich 3(PRR3)	0	16.188	23	3	4	3	1	188	20.6	9.83	16.63	3	0	682.4	583.6	475.5	729.8	594	441	682.4	569.287	473.579	683.08	574.086	455.079		682.74	0.837342	0.177689	0.680097	0.0368621	TRUE
Q6YP21	Q6YP21	Kynurenine--oxoglutarate transaminase 3 [OS=Homo sapiens]	KYAT3	kynurenine aminotransferase 3(KYAT3)	0	82.631	34	13	35	12	1	454	51.4	8.19	134.53	13	0	5780.8	4984.9	4835.2	6068	5030.5	4946.4	5780.8	4862.64	4815.67	5679.54	4861.85	5104.32		5730.17	0.848535	0.125897	0.865593	0.338466	TRUE
Q9UJX6	Q9UJX6	anaphase-promoting complex subunit 2 [OS=Homo sapiens]	ANAPC2	anaphase promoting complex subunit 2(ANAPC2)	0	73.01	29	20	40	20	1	822	93.8	5.22	138.25	20	0	3995.6	3507.5	3433.4	4426.4	3606.6	3482.6	3995.6	3421.48	3419.53	4143.03	3485.69	3593.79		4069.32	0.848689	0.0879633	0.861732	0.339696	TRUE
O15072	O15072	A disintegrin and metalloproteinase with thrombospondin motifs 3 [OS=Homo sapiens]	ADAMTS3	ADAM metallopeptidase with thrombospondin type 1 motif 3(ADAMTS3)	0.001	9.672	3	3	3	2	1	1205	135.5	7.15	11.51	3	0	140.7	122.7	196.1	154	126.3	184.5	140.7	119.691	195.308	144.141	122.066	190.39		142.421	0.848741	0.230215	1.35408	0.183948	FALSE
Q8N3X1-2	Q8N3X1	Isoform 2 of Formin-binding protein 4 [OS=Homo sapiens]	FNBP4	formin binding protein 4(FNBP4)	0	160.61	30	27	79	27	1	1019	110.4	4.75	247.96	27	0	5989.9	5191.1	4707.8	6368.9	5256.7	4597.4	5989.9	5063.79	4688.78	5961.18	5080.47	4744.18		5975.54	0.848815	0.126646	0.789298	0.111401	TRUE
O95786	O95786	Probable ATP-dependent RNA helicase DDX58 [OS=Homo sapiens]	DDX58	DExD/H-box helicase 58(DDX58)	0.001	7.641	2	2	4	2	1	925	106.5	6.4	7.05	2	0	80.9	75.1	67.2	90.3	69.5	66.9	80.9	73.2581	66.9285	84.5192	67.17	69.0358		82.7096	0.848923	0.230701	0.821938	0.2041	TRUE
O15525	O15525	transcription factor MafG [OS=Homo sapiens]	MAFG	MAF bZIP transcription factor G(MAFG)	0	18.665	30	4	6	3	1	162	17.8	10.04	20.6	4	1	2074.1	2273.3	1350.4	2007.2	2254.9	1301.9	2074.1	2217.55	1344.94	1878.7	2179.31	1343.46		1976.4	1.11234	0.361527	0.680127	0.0290391	FALSE
Q9BRR3	Q9BRR3	Transmembrane protein 246 [OS=Homo sapiens]	TMEM246	transmembrane protein 246(TMEM246)	0.003	6.303	2	1	2	1	1	403	46.6	7.59	6.33	1	0	130.6	101.4	97.5	120.8	111.7	97.5	130.6	98.9131	97.1061	113.067	107.955	100.613		121.833	0.848981	0.230857	0.811432	0.182816	TRUE
Q9UHA2	Q9UHA2	SS18-like protein 2 [OS=Homo sapiens]	SS18L2	SS18 like 2(SS18L2)	0.001	11.47	45	3	3	3	1	77	8.8	5.83	11.96	3	0	220.6	209.6	216.5	277.4	210.6	214.1	220.6	204.459	215.625	259.641	203.54	220.935		240.121	0.849571	0.143346	0.909044	0.441687	TRUE
Q8TBB5	Q8TBB5	kelch domain-containing protein 4 [OS=Homo sapiens]	KLHDC4	kelch domain containing 4(KLHDC4)	0	90.909	49	17	44	17	1	520	57.9	5.72	125.08	17	0	3312.6	2883.3	3011.8	3577.5	2945.8	2820	3312.6	2812.59	2999.63	3348.48	2847.04	2910.03		3330.54	0.849657	0.135248	0.887194	0.368054	TRUE
P48637	P48637	glutathione synthetase [OS=Homo sapiens]	GSS	glutathione synthetase(GSS)	0	157.292	59	23	91	23	1	474	52.4	5.92	262.26	23	0	11641.4	10245.8	10791.5	12826.3	10448	10954.6	11641.4	9994.52	10747.9	12005.2	10097.7	11304.3		11823.3	0.849689	0.0867774	0.932576	0.726246	TRUE
Q96F63	Q96F63	Coiled-coil domain-containing protein 97 [OS=Homo sapiens]	CCDC97	coiled-coil domain containing 97(CCDC97)	0	61.878	48	11	15	11	1	343	38.9	4.59	65.13	11	0	1346.4	1150.6	1381.1	1418.2	1189.8	1367.9	1346.4	1122.38	1375.52	1327.41	1149.91	1411.57		1336.9	0.849834	0.140634	1.04237	0.84517	FALSE
Q99590-1	Q99590	protein SCAF11 [OS=Homo sapiens]	SCAF11	SR-related CTD associated factor 11(SCAF11)	0	212.615	27	32	71	31	1	1463	164.6	8.41	278.04	32	1	9642.2	8650.6	7558	11040.1	8834.1	7235.6	9642.2	8438.44	7527.47	10333.3	8537.94	7466.6		9987.77	0.849859	0.0871341	0.750622	0.05792	TRUE
Q92888-3	Q92888	Isoform 3 of Rho guanine nucleotide exchange factor 1 [OS=Homo sapiens]	arhgef1	Rho guanine nucleotide exchange factor 1(ARHGEF1)	0	250.123	46	37	127	37	1	927	104	5.62	459.69	37	0	13349.4	11892.9	12392.3	13961.8	11228.6	12549	13349.4	11601.2	12342.2	13068	10852.2	12949.6		13208.7	0.849947	0.08436	0.957395	0.991192	TRUE
Q96S94	Q96S94	cyclin-L2 [OS=Homo sapiens]	CCNL2	cyclin L2(CCNL2)	0	57.994	24	11	29	10	1	520	58.1	10.26	94	11	1	2250.5	1893.1	1745.4	2270.7	1937.6	1691	2250.5	1846.67	1738.35	2125.33	1872.64	1744.99		2187.92	0.849967	0.142488	0.796039	0.18752	TRUE
Q8N157-1	Q8N157	Jouberin [OS=Homo sapiens]	AHI1	Abelson helper integration site 1(AHI1)	0	23.869	7	6	7	6	1	1196	137	7.12	17.02	6	0	719.8	616.1	632.7	737	617.9	556.5	719.8	600.99	630.144	689.819	597.185	574.267		704.809	0.849999	0.206656	0.854423	0.334918	TRUE
O95989	O95989	Diphosphoinositol polyphosphate phosphohydrolase 1 [OS=Homo sapiens]	NUDT3	nudix hydrolase 3(NUDT3)	0	60.886	50	7	37	6	1	172	19.5	6.34	98.69	7	0	6497.4	5764	7272	7359.7	5955.3	7544.9	6497.4	5622.64	7242.62	6888.55	5755.65	7785.78		6692.97	0.850017	0.129896	1.1227	0.317311	FALSE
Q3MII6-1	Q3MII6	TBC1 domain family member 25 [OS=Homo sapiens]	TBC1D25	TBC1 domain family member 25(TBC1D25)	0	13.287	6	3	4	3	1	688	76.3	6.16	14.85	3	0	272.5	253.7	315.8	295.9	227.2	290.5	272.5	247.478	314.524	276.957	219.583	299.774		274.729	0.850041	0.144611	1.11801	0.683608	FALSE
Q9BXW9-1	Q9BXW9	Isoform 1 of Fanconi anemia group D2 protein [OS=Homo sapiens]	FANCD2	Fanconi anemia complementation group D2(FANCD2)	0	94.325	14	20	54	20	1	1471	166.4	6.24	146.67	20	0	6222.4	5608.1	5345.8	6923	5512.9	5311.5	6222.4	5470.56	5324.2	6479.8	5328.08	5481.07		6351.1	0.850139	0.130229	0.850662	0.279512	TRUE
O75330-3	O75330	Isoform 3 of Hyaluronan mediated motility receptor [OS=Homo sapiens]	HMMR	hyaluronan mediated motility receptor(HMMR)	0	366.245	63	50	158	50	1	725	84.2	5.9	581.76	50	0	27690.2	23964.5	26226.3	29930.2	24814.3	26308.1	27690.2	23376.8	26120.4	28014.1	23982.4	27148		27852.2	0.850188	0.0462668	0.95627	0.862716	TRUE
Q6W2J9-1	Q6W2J9	BCL-6 corepressor [OS=Homo sapiens]	BCOR	BCL6 corepressor(BCOR)	0	235.21	34	39	64	38	1	1755	192.1	6.48	250.59	39	1	8713.9	7505.1	7060.7	8978.7	7485.1	6728.6	8713.9	7321.03	7032.18	8403.9	7234.16	6943.42		8558.9	0.850296	0.148673	0.816436	0.20708	TRUE
P32321-2	P32321	Isoform 2 of Deoxycytidylate deaminase [OS=Homo sapiens]	DCTD	dCMP deaminase(DCTD)	0	69.707	65	8	30	8	1	189	21	7.53	135.36	8	0	5316.9	4522.5	5723.3	5483.8	4629.3	5633.5	5316.9	4411.58	5700.18	5132.74	4474.1	5813.35		5224.82	0.850335	0.165219	1.10181	0.509766	FALSE
P04035-3	P04035	Isoform 3 of 3-hydroxy-3-methylglutaryl-coenzyme A reductase [OS=Homo sapiens]	HMGCR	3-hydroxy-3-methylglutaryl-CoA reductase(HMGCR)	0	26.594	9	7	8	7	1	908	99.7	6.77	22.72	7	0	939.4	849.5	869.6	1182.4	942.9	847.6	939.4	828.666	866.087	1106.71	911.29	874.66		1023.05	0.850374	0.153918	0.850762	0.29531	TRUE
Q9H7X7	Q9H7X7	Intraflagellar transport protein 22 homolog [OS=Homo sapiens]	IFT22	intraflagellar transport 22(IFT22)	0.001	9.472	16	2	3	2	1	185	20.8	5.15	9.2	2	0	305.2	264.2	280.9	327	271.2	272.4	305.2	257.72	279.765	306.066	262.108	281.097		305.633	0.850413	0.145617	0.917541	0.472255	TRUE
Q9H204	Q9H204	Mediator of RNA polymerase II transcription subunit 28 [OS=Homo sapiens]	MED28	mediator complex subunit 28(MED28)	0	28.051	21	4	23	4	1	178	19.5	5.58	66.89	4	0	2821.9	2718.1	1902.8	2990.5	2783.7	1868.3	2821.9	2651.44	1895.11	2799.05	2690.38	1927.95		2810.48	0.95034	0.591182	0.680144	0.0152105	TRUE
Q9Y4H4	Q9Y4H4	G-protein-signaling modulator 3 [OS=Homo sapiens]	GPSM3	G-protein signaling modulator 3(GPSM3)	0	14.959	23	2	9	2	1	160	17.9	4.97	32.26	2	0	287.2	274.7	391.6	325.4	243.6	345.3	287.2	267.963	390.018	304.569	235.433	356.324		295.884	0.850664	0.146301	1.26121	0.254006	FALSE
Q9BPX3	Q9BPX3	Condensin complex subunit 3 [OS=Homo sapiens]	NCAPG	non-SMC condensin I complex subunit G(NCAPG)	0	236.084	37	32	103	32	1	1015	114.3	5.59	362.39	32	0	12942.7	11371.1	11358.8	13511.7	11047.2	10981.3	12942.7	11092.2	11312.9	12646.7	10676.8	11331.9		12794.7	0.850706	0.0859984	0.884929	0.491962	TRUE
Q5T5U3-3	Q5T5U3	Isoform 3 of Rho GTPase-activating protein 21 [OS=Homo sapiens]	ARHGAP21	Rho GTPase activating protein 21(ARHGAP21)	0	72.145	19	18	21	1	1	1164	129.2	8.44	73.69	18	0	43.2	36.8	52.7	42.5	35.9	47.4	43.2	35.8975	52.4871	39.7792	34.6965	48.9133		41.4896	0.850742	0.187785	1.222	0.447551	FALSE
Q8NEM7-3	Q8NEM7	Isoform 3 of Transcription factor SPT20 homolog [OS=Homo sapiens]	SUPT20H	SPT20 homolog, SAGA complex component(SUPT20H)	0	34.002	14	9	13	9	1	811	88	8.19	35.11	9	0	668.5	555.9	514.2	707.5	610.3	532.8	668.5	542.266	512.123	662.207	589.84	549.81		665.354	0.850755	0.214871	0.798021	0.171817	TRUE
Q6Y7W6-1	Q6Y7W6	GRB10-interacting GYF protein 2 [OS=Homo sapiens]	GIGYF2	GRB10 interacting GYF protein 2(GIGYF2)	0	222.936	32	32	79	30	1	1299	150	5.54	283.4	32	0	10136.8	9013.1	9522.4	10946.3	8847.1	9087.9	10136.8	8792.05	9483.93	10245.5	8550.5	9378.04		10191.2	0.850862	0.089272	0.925408	0.681044	TRUE
Q9UI95	Q9UI95	Mitotic spindle assembly checkpoint protein MAD2B [OS=Homo sapiens]	MAD2L2	MAD2 mitotic arrest deficient-like 2 (yeast)(MAD2L2)	0.001	8.951	13	2	5	2	1	211	24.3	6.52	10.14	2	0	1114.1	925.2	949.4	1128.6	977	918.4	1114.1	902.509	945.565	1056.35	944.246	947.721		1085.22	0.850863	0.15515	0.872301	0.359735	TRUE
P42694	P42694	Probable helicase with zinc finger domain [OS=Homo sapiens]	HELZ	helicase with zinc finger(HELZ)	0	237.192	26	40	78	12	1	1942	218.8	7.42	279.64	40	28	7004	6078.9	7208.1	7514.3	6225.4	6860	7004	5929.81	7178.98	7033.25	6016.69	7079.01		7018.62	0.851058	0.150898	1.01573	0.8259	FALSE
Q7Z3D6-2	Q7Z3D6	Isoform 2 of UPF0317 protein C14orf159, mitochondrial [OS=Homo sapiens]	c14orf159	chromosome 14 open reading frame 159(C14orf159)	0.001	9.644	2	1	4	1	1	621	66.9	6.87	15.29	1	0	115.5	104.2	125.4	133.4	106.5	124.4	115.5	101.644	124.893	124.86	102.93	128.372		120.18	0.851115	0.236629	1.05369	0.942761	FALSE
P33552	P33552	cyclin-dependent kinases regulatory subunit 2 [OS=Homo sapiens]	CKS2	CDC28 protein kinase regulatory subunit 2(CKS2)	0	25.168	65	5	7	4	1	79	9.9	8.46	26.45	5	1	1209.5	1072.8	956.2	1280.7	1038.6	971.9	1209.5	1046.49	952.337	1198.71	1003.78	1002.93		1204.11	0.851366	0.156424	0.811916	0.19977	TRUE
Q8N5M9	Q8N5M9	Protein jagunal homolog 1 [OS=Homo sapiens]	JAGN1	jagunal homolog 1(JAGN1)	0	13.231	13	2	3	2	1	183	21.1	9.73	14.59	2	0	294.3	260.5	358	381.5	310.9	374.9	294.3	254.111	356.554	357.077	300.477	386.869		325.689	0.851409	0.243596	1.14131	0.565956	FALSE
Q9HC77	Q9HC77	centromere protein J [OS=Homo sapiens]	CENPJ	centromere protein J(CENPJ)	0	46.378	11	11	13	11	1	1338	152.9	6.61	44.77	11	0	1270.6	1132.4	1110.8	1471.8	1190.2	1020.6	1270.6	1104.63	1106.31	1377.58	1150.3	1053.18		1324.09	0.851501	0.144983	0.815465	0.179922	TRUE
O14763	O14763	Tumor necrosis factor receptor superfamily member 10B [OS=Homo sapiens]	TNFRSF10B	TNF receptor superfamily member 10b(TNFRSF10B)	0.001	8.933	7	2	2	2	1	440	47.8	5.55	8.49	2	0	134.6	117.7	137.5	143.7	118.3	125.2	134.6	114.813	136.945	134.501	114.334	129.197		134.55	0.851531	0.237764	0.989004	0.77851	TRUE
Q13506-1	Q13506	NGFI-A-binding protein 1 [OS=Homo sapiens]	NAB1	NGFI-A binding protein 1(NAB1)	0	35.167	22	10	12	9	1	487	54.4	6.7	40.5	10	1	1587.1	1412.5	1929	1683.6	1361.6	1754.2	1587.1	1377.86	1921.21	1575.82	1315.95	1810.2		1581.46	0.851685	0.145469	1.17974	0.344391	FALSE
Q8WUD6-1	Q8WUD6	Cholinephosphotransferase 1 [OS=Homo sapiens]	CHPT1	choline phosphotransferase 1(CHPT1)	0.001	9.941	7	2	2	2	1	406	45.1	6.92	9.48	2	0	199.5	184.4	254.7	238.8	186.7	235.9	199.5	179.878	253.671	223.512	180.441	243.431		211.506	0.851792	0.149396	1.17515	0.483879	FALSE
Q9BWT6	Q9BWT6	Meiotic nuclear division protein 1 homolog [OS=Homo sapiens]	MND1	meiotic nuclear divisions 1(MND1)	0	31.891	43	8	12	8	1	205	23.7	8.19	33.85	8	0	913.6	848.3	606.4	939.3	872.9	596.5	913.6	827.495	603.95	879.168	843.636	615.544		896.384	0.932152	0.553984	0.68023	0.0480504	TRUE
Q96E29	Q96E29	Transcription termination factor 3, mitochondrial [OS=Homo sapiens]	MTERF3	mitochondrial transcription termination factor 3(MTERF3)	0	37.599	21	8	14	8	1	417	47.9	8.53	52.63	8	0	2776.8	2141.5	2079.4	2589.2	2422.3	1908	2776.8	2088.98	2071	2423.44	2341.09	1968.91		2600.12	0.851897	0.147599	0.77687	0.148414	TRUE
P41214	P41214	Eukaryotic translation initiation factor 2d [OS=Homo sapiens]	EIF2D	eukaryotic translation initiation factor 2D(EIF2D)	0	180.226	49	21	70	21	1	584	64.7	7.65	273.27	21	0	8434.5	5332.2	5756.1	9062.9	5502.6	5603.8	8434.5	5201.43	5732.85	8482.71	5318.13	5782.71		8458.61	0.621825	0.000141968	0.6807	0.0216252	TRUE
O43182	O43182	Rho GTPase-activating protein 6 [OS=Homo sapiens]	ARHGAP6	Rho GTPase activating protein 6(ARHGAP6)	0	155.373	31	21	42	21	1	974	105.9	7.36	180.04	21	0	4588.5	4032.5	3855.1	4843.6	3972.3	3844.3	4588.5	3933.6	3839.53	4533.52	3839.13	3967.03		4561.01	0.852084	0.170126	0.855793	0.291054	TRUE
O00116	O00116	Alkyldihydroxyacetonephosphate synthase, peroxisomal [OS=Homo sapiens]	AGPS	alkylglycerone phosphate synthase(AGPS)	0	245.666	60	28	110	28	1	658	72.9	7.34	403.18	28	0	12080.7	10445.6	8943.5	12729.2	10613.7	9020.7	12080.7	10189.4	8907.37	11914.3	10257.9	9308.69		11997.5	0.852148	0.0920753	0.759161	0.0681912	TRUE
Q8N8R7	Q8N8R7	ARL14 effector protein [OS=Homo sapiens]	ARL14EP	ADP ribosylation factor like GTPase 14 effector protein(ARL14EP)	0	20.039	27	5	13	5	1	260	29.3	8.07	23.34	5	0	892.5	783.3	782.9	997.3	819.5	789.8	892.5	764.089	779.737	933.455	792.026	815.015		912.977	0.85222	0.213252	0.87338	0.393077	TRUE
Q96GE4	Q96GE4	Centrosomal protein of 95 kDa [OS=Homo sapiens]	CEP95	centrosomal protein 95(CEP95)	0	50.063	14	12	15	12	1	821	95.2	8.59	47.69	12	0	1575	1433.5	1186.8	1697	1342.6	1125.7	1575	1398.34	1182.01	1588.36	1297.59	1161.64		1581.68	0.852237	0.146934	0.740872	0.0622782	TRUE
O60287	O60287	nucleolar pre-ribosomal-associated protein 1 [OS=Homo sapiens]	URB1	URB1 ribosome biogenesis 1 homolog (S. cerevisiae)(URB1)	0	329.129	28	53	149	52	1	2271	254.2	6.47	487.07	53	0	15298	13314.9	12229.6	16180.5	13407.3	11828.9	15298	12988.3	12180.2	15144.7	12957.8	12206.5		15221.3	0.852297	0.0895148	0.801071	0.141662	TRUE
Q6ICB0	Q6ICB0	Desumoylating isopeptidase 1 [OS=Homo sapiens]	DESI1	desumoylating isopeptidase 1(DESI1)	0.001	11.881	20	2	2	2	1	168	18.3	4.94	11.65	2	0	110.6	90.1	100.9	106	94.1	108	110.6	87.8903	100.492	99.2141	90.9453	111.448		104.907	0.852353	0.240022	1.01013	0.875864	FALSE
Q6IQ55	Q6IQ55	tau-tubulin kinase 2 [OS=Homo sapiens]	TTBK2	tau tubulin kinase 2(TTBK2)	0.008	4.46	1	1	1	1	1	1244	137.3	7.01	3.21	1	0	65	59.6	60	70.5	55.4	73.9	65	58.1383	59.7576	65.9867	53.5427	76.2593		65.4934	0.852613	0.193086	1.0384	0.955792	FALSE
Q86X95	Q86X95	Corepressor interacting with RBPJ 1 [OS=Homo sapiens]	CIR1	corepressor interacting with RBPJ, 1(CIR1)	0	34.209	20	7	25	7	1	450	52.3	9.86	87.25	7	0	2472.7	2163.9	2420.7	2649.7	2185.5	2187.6	2472.7	2110.83	2410.92	2480.07	2112.23	2257.44		2476.39	0.852666	0.149675	0.942576	0.729688	TRUE
P49005	P49005	DNA polymerase delta subunit 2 [OS=Homo sapiens]	POLD2	DNA polymerase delta 2, accessory subunit(POLD2)	0	155.947	59	22	56	22	1	469	51.3	5.58	221.41	22	0	6252.8	5448.9	4628.1	6621.4	5484.9	4597.6	6252.8	5315.26	4609.4	6197.51	5301.02	4744.38		6225.16	0.852692	0.137359	0.751289	0.0563737	TRUE
Q9NVP1	Q9NVP1	ATP-dependent RNA helicase DDX18 [OS=Homo sapiens]	DDX18	DEAD-box helicase 18(DDX18)	0	319.153	51	31	259	31	1	670	75.4	9.5	856.26	31	0	23149.2	20490.8	19050.4	25900.1	21140.4	18251.4	23149.2	19988.3	18973.4	24242	20431.7	18834.1		23695.6	0.852899	0.0501402	0.797775	0.0712453	TRUE
Q8NB37	Q8NB37	Glutamine amidotransferase-like class 1 domain-containing protein 1 [OS=Homo sapiens]	PDDC1	Parkinson disease 7 domain containing 1(PDDC1)	0	28.556	32	5	7	5	1	220	23.3	6.61	30.01	5	0	903.9	778.5	833.4	925.4	776.3	803.4	903.9	759.407	830.033	866.158	750.275	829.049		885.029	0.8529	0.2153	0.937304	0.629502	TRUE
Q08050	Q08050	Forkhead box protein M1 [OS=Homo sapiens]	FOXM1	forkhead box M1(FOXM1)	0	19.62	7	3	5	3	1	763	84.2	7.91	17.47	3	0	155.9	132.4	129.7	163.3	138.9	120.5	155.9	129.153	129.176	152.846	134.243	124.347		154.373	0.853117	0.242135	0.821139	0.202418	TRUE
Q16384	Q16384	Protein SSX1 [OS=Homo sapiens]	SSX1	SSX family member 1(SSX1)	0	39.823	41	8	12	8	1	188	21.9	9.45	43.56	8	0	2512.7	2191.3	2186.7	2644.6	2191.4	2117.3	2512.7	2137.56	2177.87	2475.3	2117.93	2184.9		2494	0.853146	0.150981	0.874652	0.42587	TRUE
Q6ZU80	Q6ZU80	centrosomal protein of 128 kDa [OS=Homo sapiens]	CEP128	centrosomal protein 128(CEP128)	0.008	4.557	1	1	2	1	1	1094	127.9	6.52	5	1	0	125.4	109.7	98.8	130.5	107.8	103.1	125.4	107.01	98.4009	122.146	104.186	106.392		123.773	0.853158	0.24225	0.827292	0.215613	TRUE
Q8N3J3	Q8N3J3	Uncharacterized protein C17orf53 [OS=Homo sapiens]	c17orf53	chromosome 17 open reading frame 53(C17orf53)	0	42.584	17	7	13	7	1	647	69.7	6.23	44.12	7	0	553.7	515	552.7	654.9	510.1	566.5	553.7	502.369	550.467	612.975	492.999	584.586		583.337	0.853167	0.222112	0.972896	0.766206	TRUE
P62633-4	P62633	Isoform 4 of Cellular nucleic acid-binding protein [OS=Homo sapiens]	CNBP	CCHC-type zinc finger nucleic acid binding protein(CNBP)	0	72.223	61	9	39	2	1	178	19.6	7.58	123.69	9	0	1034.1	894.8	737.7	1087.9	909.3	747.1	1034.1	872.855	734.72	1018.25	878.816	770.952		1026.18	0.853493	0.161902	0.733631	0.0788954	TRUE
Q96E16	Q96E16	small integral membrane protein 19 [OS=Homo sapiens]	SMIM19	small integral membrane protein 19(SMIM19)	0.007	4.624	18	1	1	1	1	107	12.4	5.45	3.99	1	0	13.2	12	13.5	14.1	11.2	9.6	13.2	11.7057	13.4455	13.1973	10.8245	9.90649		13.1987	0.853503	0.195646	0.884633	0.334054	TRUE
P05165-1	P05165	Propionyl-CoA carboxylase alpha chain, mitochondrial [OS=Homo sapiens]	PCCA	propionyl-CoA carboxylase alpha subunit(PCCA)	0	85.119	27	15	43	15	1	728	80	7.52	137.77	15	0	3758.7	3413.6	2916.9	4064.4	3234.3	2983.3	3758.7	3329.88	2905.12	3804.21	3125.87	3078.54		3781.45	0.853607	0.0981493	0.791186	0.158051	TRUE
Q2NL68-1	Q2NL68	Proline and serine-rich protein 3 [OS=Homo sapiens]	PROSER3	proline and serine rich 3(PROSER3)	0.001	7.442	10	2	2	2	1	480	51	7.14	9.78	2	0	59.8	47.8	53.9	63.9	57.4	56.6	59.8	46.6277	53.6823	59.8092	55.4757	58.407		59.8046	0.853641	0.196045	0.937129	0.512387	TRUE
O43286	O43286	Beta-1,4-galactosyltransferase 5 [OS=Homo sapiens]	B4GALT5	beta-1,4-galactosyltransferase 5(B4GALT5)	0.006	5.221	4	1	1	1	1	388	45.1	8.15	3.31	1	0	108.2	93	97.2	114.3	96.2	93	108.2	90.7191	96.8073	106.983	92.9749	95.9691		107.591	0.853665	0.24366	0.895873	0.405177	TRUE
Q9Y6J9	Q9Y6J9	TAF6-like RNA polymerase II p300/CBP-associated factor-associated factor 65 kDa subunit 6L [OS=Homo sapiens]	TAF6L	TATA-box binding protein associated factor 6 like(TAF6L)	0	92.427	32	16	30	16	1	622	67.8	8.97	104.32	16	0	2058.9	1770.5	2103.8	2171.5	1828	1904.5	2058.9	1727.08	2095.3	2032.48	1766.72	1965.3		2045.69	0.853939	0.185622	0.992477	0.917156	TRUE
P12755	P12755	Ski oncogene [OS=Homo sapiens]	SKI	SKI proto-oncogene(SKI)	0	56.689	23	12	16	12	1	728	80	7.62	50.96	12	0	1319.2	1129.5	1168	1372.7	1161.1	1136.4	1319.2	1101.8	1163.28	1284.82	1122.17	1172.68		1302.01	0.854053	0.151838	0.897059	0.442151	TRUE
Q96BW1	Q96BW1	Uracil phosphoribosyltransferase homolog [OS=Homo sapiens]	UPRT	uracil phosphoribosyltransferase homolog(UPRT)	0	27.715	25	6	14	6	1	309	33.8	6.04	38.56	6	0	891.8	777.3	874.2	936.7	778.5	868	891.8	758.236	870.668	876.734	752.401	895.712		884.267	0.854175	0.219181	0.998782	0.9005	TRUE
Q9UPS8-3	Q9UPS8	Isoform 3 of Ankyrin repeat domain-containing protein 26 [OS=Homo sapiens]	ANKRD26	ankyrin repeat domain 26(ANKRD26)	0	32.966	6	8	13	8	1	1710	196.3	5.72	42.42	8	0	1697.2	1489	1407.4	1871.8	1545.8	1329	1697.2	1452.48	1401.71	1751.97	1493.98	1371.43		1724.59	0.854251	0.186525	0.804003	0.174317	TRUE
Q9H2H9	Q9H2H9	Sodium-coupled neutral amino acid transporter 1 [OS=Homo sapiens]	SLC38A1	solute carrier family 38 member 1(SLC38A1)	0	14.663	6	3	7	3	1	487	54	7.02	25.54	3	0	874.8	814.2	787.9	986.8	767.9	794.4	874.8	794.231	784.717	923.627	742.156	819.762		899.214	0.854295	0.21955	0.892157	0.456338	TRUE
Q8NA72	Q8NA72	Centrosomal protein POC5 [OS=Homo sapiens]	POC5	POC5 centriolar protein(POC5)	0	43.992	22	9	17	9	1	575	63.3	7.42	40.03	9	0	725.9	666.5	643.5	794.6	626.4	635.9	725.9	650.154	640.9	743.731	605.4	656.202		734.816	0.854333	0.219665	0.882604	0.423463	TRUE
O14662-1	O14662	Syntaxin-16 [OS=Homo sapiens]	STX16	syntaxin 16(STX16)	0	31.419	23	5	8	1	1	325	37	6.11	35.34	5	4	1154	1156.3	738.6	1176.1	1119	774.9	1154	1127.94	735.616	1100.81	1081.49	799.639		1127.4	0.979874	0.764518	0.680881	0.0377877	TRUE
Q8IW19	Q8IW19	Aprataxin and PNK-like factor [OS=Homo sapiens]	APLF	aprataxin and PNKP like factor(APLF)	0.003	6.747	5	2	2	2	1	511	56.9	5.08	4.99	2	0	83.2	75.1	71	97.2	78.2	66.3	83.2	73.2581	70.7132	90.9774	75.5784	68.4167		87.0887	0.854511	0.246022	0.798782	0.159429	TRUE
O95155-4	O95155	Isoform 4 of Ubiquitin conjugation factor E4 B [OS=Homo sapiens]	UBE4B	ubiquitination factor E4B(UBE4B)	0	283.025	43	40	89	40	1	1353	151.5	5.62	313.71	40	0	9756.1	8370.1	7822.6	10328.1	8728.1	7502.4	9756.1	8164.82	7791	9666.92	8435.49	7741.92		9711.51	0.854672	0.0977812	0.799717	0.139111	TRUE
Q5JPI3	Q5JPI3	Uncharacterized protein C3orf38 [OS=Homo sapiens]	C3orf38	chromosome 3 open reading frame 38(C3orf38)	0	39.26	32	7	17	7	1	329	37.5	6.47	48.74	7	0	452.7	379.3	482.3	471.1	407.5	426.2	452.7	369.998	480.352	440.941	393.839	439.807		446.821	0.854746	0.254283	1.02967	0.94763	FALSE
P41162	P41162	ETS translocation variant 3 [OS=Homo sapiens]	ETV3	ETS variant 3(ETV3)	0	13.86	13	5	6	3	1	512	57	8.57	12.8	5	0	192.6	152.2	178.9	200.5	182.7	160.7	192.6	148.467	178.177	187.664	176.575	165.83		190.132	0.85478	0.157842	0.904654	0.426348	TRUE
Q7Z4L5	Q7Z4L5	Tetratricopeptide repeat protein 21B [OS=Homo sapiens]	TTC21B	tetratricopeptide repeat domain 21B(TTC21B)	0	112.623	23	24	42	24	1	1316	150.8	6.96	116.07	24	0	3396.8	3022.3	2613.9	3704	3021.8	2604.9	3396.8	2948.18	2603.34	3466.88	2920.49	2688.06		3431.84	0.855033	0.101272	0.770928	0.122867	TRUE
Q4L235-1	Q4L235	Acyl-CoA synthetase family member 4 [OS=Homo sapiens]	AASDH	aminoadipate-semialdehyde dehydrogenase(AASDH)	0	21.602	6	6	8	6	1	1098	122.5	7.24	27.92	6	0	1069.9	908.8	888.6	1124.4	960.4	836.8	1069.9	886.511	885.01	1052.42	928.203	863.516		1061.16	0.855062	0.166036	0.823875	0.226412	TRUE
Q9UJX4	Q9UJX4	Anaphase-promoting complex subunit 5 [OS=Homo sapiens]	ANAPC5	anaphase promoting complex subunit 5(ANAPC5)	0	142.809	36	23	64	22	1	755	85	6.87	203.57	23	0	6213.7	5201.5	5360.7	6354.9	5511.2	5222.8	6213.7	5073.93	5339.04	5948.07	5326.44	5389.54		6080.89	0.855169	0.144561	0.882157	0.412559	TRUE
Q7L775	Q7L775	EPM2A-interacting protein 1 [OS=Homo sapiens]	EPM2AIP1	EPM2A interacting protein 1(EPM2AIP1)	0	111.792	45	24	63	23	1	607	70.3	6.11	198.25	24	0	5739.3	5075.5	6525.1	6243.8	5131.2	6112.5	5739.3	4951.02	6498.74	5844.08	4959.18	6307.65		5791.69	0.855553	0.145703	1.10558	0.379131	FALSE
Q6ZN17-1	Q6ZN17	Protein lin-28 homolog B [OS=Homo sapiens]	LIN28B	lin-28 homolog B(LIN28B)	0	101.06	59	14	46	13	1	250	27.1	8.91	140.65	14	1	6289.4	5329.1	6650.2	6495.8	5571.4	6198.1	6289.4	5198.4	6623.34	6079.95	5384.62	6395.98		6184.68	0.855584	0.145796	1.05255	0.612761	FALSE
O60237	O60237	Protein phosphatase 1 regulatory subunit 12b [OS=Homo sapiens]	PPP1R12B	protein phosphatase 1 regulatory subunit 12B(PPP1R12B)	0	18.611	5	4	6	3	1	982	110.3	5.67	19.96	4	0	274.9	218.8	235.2	293.8	266	208.3	274.9	213.434	234.25	274.992	257.082	214.95		274.946	0.855653	0.160378	0.816888	0.187701	TRUE
Q9NXK8	Q9NXK8	F-box/LRR-repeat protein 12 [OS=Homo sapiens]	FBXL12	F-box and leucine rich repeat protein 12(FBXL12)	0	41.091	28	7	27	7	1	326	37	8.79	80.47	7	0	1663.5	1416.5	1320.6	1752.6	1495.5	1221.9	1663.5	1381.76	1315.27	1640.4	1445.36	1260.91		1651.95	0.855692	0.190739	0.779737	0.128519	TRUE
O15212	O15212	Prefoldin subunit 6 [OS=Homo sapiens]	PFDN6	prefoldin subunit 6(PFDN6)	0	102.868	55	11	55	11	1	129	14.6	8.88	210.31	11	0	5821.4	5181.2	5142.2	6356.6	5193.4	5117.3	5821.4	5054.13	5121.43	5949.66	5019.29	5280.67		5885.53	0.855778	0.146377	0.883701	0.419926	TRUE
Q8N5M1	Q8N5M1	ATP synthase mitochondrial F1 complex assembly factor 2 [OS=Homo sapiens]	ATPAF2	ATP synthase mitochondrial F1 complex assembly factor 2(ATPAF2)	0	46.642	31	9	15	9	1	289	32.8	7.09	54.92	9	0	1672.3	1503.3	1583.4	1832.2	1482	1629.5	1672.3	1466.43	1577	1714.91	1432.32	1681.52		1693.6	0.855793	0.191036	0.96201	0.758998	TRUE
Q96HA8	Q96HA8	Protein N-terminal glutamine amidohydrolase [OS=Homo sapiens]	WDYHV1	WDYHV motif containing 1(WDYHV1)	0	15.451	28	4	5	4	1	205	23.7	5.78	21.26	4	0	337.6	293.3	397.8	371.2	310.8	383.5	337.6	286.107	396.193	347.437	300.381	395.744		342.518	0.85614	0.258843	1.15605	0.521432	FALSE
Q8WXE1	Q8WXE1	ATR-interacting protein [OS=Homo sapiens]	ATRIP	ATR interacting protein(ATRIP)	0	66.438	28	11	20	11	1	791	85.8	6.32	81.02	11	0	1256.3	1086.7	1047.4	1302.4	1096	944.6	1256.3	1060.05	1043.17	1219.02	1059.26	974.757		1237.66	0.856173	0.16901	0.815217	0.206885	TRUE
Q8NDA8-1	Q8NDA8	Maestro heat-like repeat-containing protein family member 1 [OS=Homo sapiens]	MROH1	maestro heat like repeat family member 1(MROH1)	0	14.163	3	4	5	4	1	1641	181.1	6.89	12.48	4	0	163.6	140.6	166	184.3	155.9	152	163.6	137.152	165.329	172.501	150.673	156.853		168.051	0.856364	0.251258	0.958586	0.6446	TRUE
Q9H857	Q9H857	5'-nucleotidase domain-containing protein 2 [OS=Homo sapiens]	NT5DC2	5'-nucleotidase domain containing 2(NT5DC2)	0	77.121	41	19	37	1	1	520	60.7	6.77	108.33	19	0	402.1	339.8	316.4	425.3	366.1	289.3	402.1	331.466	315.122	398.073	353.827	298.536		400.087	0.856431	0.259801	0.766907	0.125135	TRUE
P07910-1	P07910	Heterogeneous nuclear ribonucleoproteins C1/C2 [OS=Homo sapiens]	HNRNPC	heterogeneous nuclear ribonucleoprotein C (C1/C2)(HNRNPC)	0	234.53	55	25	373	1	1	306	33.7	5.08	1098.58	25	0	104.2	95.1	97	112.5	89.7	92.5	104.2	92.7676	96.6081	105.298	86.6928	95.4531		104.749	0.856622	0.251991	0.916769	0.478481	TRUE
Q7Z7C8-2	Q7Z7C8	Isoform 2 of Transcription initiation factor TFIID subunit 8 [OS=Homo sapiens]	TAF8	TATA-box binding protein associated factor 8(TAF8)	0.001	11.701	15	3	3	3	1	311	34.4	6.25	10.15	3	0	501.2	425.9	408.6	511	438.4	380.2	501.2	415.455	406.949	478.287	423.703	392.338		489.743	0.856732	0.233132	0.816027	0.209001	TRUE
P25054-1	P25054	Adenomatous polyposis coli protein [OS=Homo sapiens]	APC	APC, WNT signaling pathway regulator(APC)	0	214.134	23	43	62	43	1	2843	311.5	7.8	217.91	43	0	4835.4	4289.5	5619.3	5159.6	4238.3	5159.1	4835.4	4184.3	5596.6	4829.29	4096.21	5323.81		4832.35	0.85678	0.183832	1.12993	0.415006	FALSE
O75161	O75161	Nephrocystin-4 [OS=Homo sapiens]	NPHP4	nephrocystin 4(NPHP4)	0	20.426	6	6	9	6	1	1426	157.5	8.13	22.07	6	0	494.6	430.9	443.2	502.6	420.7	434.7	494.6	420.332	441.41	470.425	406.596	448.578		482.512	0.856899	0.233657	0.922244	0.543857	TRUE
Q9BV68-2	Q9BV68	Isoform 2 of E3 ubiquitin-protein ligase RNF126 [OS=Homo sapiens]	rnf126	ring finger protein 126(RNF126)	0	44.369	35	8	12	8	1	311	33.8	5.47	48.37	8	0	1360.8	1212.2	999.2	1453.5	1189.4	994.1	1360.8	1182.47	995.164	1360.45	1149.53	1025.84		1360.62	0.856958	0.159938	0.742674	0.0640737	TRUE
Q9Y4P1-2	Q9Y4P1	Isoform 2 of Cysteine protease ATG4B [OS=Homo sapiens]	ATG4B	autophagy related 4B cysteine peptidase(ATG4B)	0	101.018	35	11	31	11	1	468	52.5	8.59	125.72	11	0	4466.3	3866.4	3671.5	4821.9	4059.6	3743.1	4466.3	3771.58	3656.67	4513.21	3923.5	3862.6		4489.76	0.85696	0.184373	0.837381	0.226776	TRUE
Q8N6H7	Q8N6H7	ADP-ribosylation factor GTPase-activating protein 2 [OS=Homo sapiens]	ARFGAP2	ADP ribosylation factor GTPase activating protein 2(ARFGAP2)	0	126.808	40	20	60	20	1	521	56.7	7.99	178.1	20	0	8105.9	7161.6	7428.7	8456.3	6977.6	7156.7	8105.9	6985.96	7398.69	7914.94	6743.68	7385.18		8010.42	0.856986	0.169095	0.92279	0.652363	TRUE
Q14693-7	Q14693	Isoform 7 of Phosphatidate phosphatase LPIN1 [OS=Homo sapiens]	LPIN1	lipin 1(LPIN1)	0	46.485	14	11	17	8	1	975	107.8	6.52	49.2	11	3	1285.5	1187.8	1069	1418.4	1118.4	999.8	1285.5	1158.67	1064.68	1327.6	1080.91	1031.72		1306.55	0.857058	0.160222	0.802267	0.15169	TRUE
O15269	O15269	serine palmitoyltransferase 1 [OS=Homo sapiens]	SPTLC1	serine palmitoyltransferase long chain base subunit 1(SPTLC1)	0	91.535	37	15	43	15	1	473	52.7	6.01	148.19	15	0	4439.1	4034	4122.7	5082.1	4083.7	4085.9	4439.1	3935.06	4106.05	4756.75	3946.79	4216.35		4597.93	0.85711	0.184827	0.905016	0.517593	TRUE
Q9UN36-1	Q9UN36	Protein NDRG2 [OS=Homo sapiens]	NDRG2	NDRG family member 2(NDRG2)	0	109.239	55	13	47	12	1	371	40.8	5.21	172.91	13	0	4899.5	4315.2	5754.5	5032.3	4166.9	5593.8	4899.5	4209.37	5731.25	4710.14	4027.21	5772.39		4804.82	0.857116	0.184843	1.19709	0.235004	FALSE
Q96SL8	Q96SL8	Flt3-interacting zinc finger protein 1 [OS=Homo sapiens]	FIZ1	FLT3 interacting zinc finger 1(FIZ1)	0.003	6.702	5	2	2	2	1	496	52	8.19	6.44	2	0	188.6	195.7	198.1	231.2	161.7	194.9	188.6	190.9	197.3	216.399	156.279	201.122		202.5	0.857235	0.16505	0.983761	0.745182	TRUE
O60890	O60890	Oligophrenin-1 [OS=Homo sapiens]	OPHN1	oligophrenin 1(OPHN1)	0	13.243	6	3	4	3	1	802	91.6	7.96	18.11	3	0	176	154.6	145.5	189.2	157.2	157.8	176	150.808	144.912	177.088	151.93	162.838		176.544	0.857402	0.254225	0.871597	0.329025	TRUE
Q8NI77	Q8NI77	Kinesin-like protein KIF18A [OS=Homo sapiens]	KIF18A	kinesin family member 18A(KIF18A)	0	67.664	21	17	24	15	1	898	102.2	8.91	75.75	17	1	2498.3	2137.9	2048.1	2587.6	2207.2	1979.9	2498.3	2085.47	2039.83	2421.95	2133.2	2043.11		2460.12	0.857411	0.162972	0.829823	0.27406	TRUE
Q86YN6-1	Q86YN6	Peroxisome proliferator-activated receptor gamma coactivator 1-beta [OS=Homo sapiens]	PPARGC1B	PPARG coactivator 1 beta(PPARGC1B)	0	20.652	6	5	5	5	1	1023	113.2	5.02	17.14	5	0	436.9	380.8	362.7	470.9	394.4	347.2	436.9	371.461	361.235	440.754	381.178	358.285		438.827	0.857557	0.263536	0.819821	0.227505	TRUE
Q9H773	Q9H773	dCTP pyrophosphatase 1 [OS=Homo sapiens]	DCTPP1	dCTP pyrophosphatase 1(DCTPP1)	0	69.355	75	13	24	13	1	170	18.7	5.03	100.68	13	0	2507.6	2218.7	2168.1	2701.5	2229.5	2076.6	2507.6	2164.29	2159.34	2528.56	2154.76	2142.9		2518.08	0.857607	0.163542	0.85427	0.351579	TRUE
Q5F1R6-3	Q5F1R6	Isoform 3 of DnaJ homolog subfamily C member 21 [OS=Homo sapiens]	DNAJC21	DnaJ heat shock protein family (Hsp40) member C21(DNAJC21)	0	95.466	30	14	28	14	1	544	63.6	5.63	110.76	14	0	3477.6	2982.5	2589.3	3605.4	3070.5	2545.4	3477.6	2909.35	2578.84	3374.59	2967.56	2626.66		3426.09	0.85767	0.107255	0.759685	0.106166	TRUE
Q9H496	Q9H496	Torsin-1A-interacting protein 2, isoform IFRG15 [OS=Homo sapiens]	TOR1AIP2	torsin 1A interacting protein 2(TOR1AIP2)	0.005	5.299	11	1	1	1	1	131	15.3	7.31	5.01	1	0	134.2	116.4	117	130	109.6	113.3	134.2	113.545	116.527	121.678	105.926	116.917		127.939	0.857718	0.255133	0.912329	0.462323	TRUE
O76095-1	O76095	Protein JTB [OS=Homo sapiens]	JTB	jumping translocation breakpoint(JTB)	0.001	10.024	10	2	2	2	1	146	16.3	8.28	10.85	2	0	259.7	223.2	318.3	264.5	225	319.8	259.7	217.726	317.014	247.567	217.457	330.01		253.634	0.857897	0.167033	1.27551	0.224785	FALSE
Q53H96	Q53H96	Pyrroline-5-carboxylate reductase 3 [OS=Homo sapiens]	PYCRL	pyrroline-5-carboxylate reductase-like(PYCRL)	0	78.603	45	11	41	11	1	274	28.6	7.72	119.13	11	0	2827.2	2483	2849	3081.9	2564.2	2666.8	2827.2	2422.1	2837.49	2884.6	2478.24	2751.94		2855.9	0.857932	0.15704	0.978576	0.821134	TRUE
A7E2V4-4	A7E2V4	Isoform 4 of Zinc finger SWIM domain-containing protein 8 [OS=Homo sapiens]	ZSWIM8	zinc finger SWIM-type containing 8(ZSWIM8)	0	68.174	12	15	34	15	1	1842	197.7	6.8	92.47	15	0	2346.4	2093	2209.9	2595.5	2127	2166.1	2346.4	2041.67	2200.97	2429.34	2055.69	2235.25		2387.87	0.857953	0.164548	0.928909	0.662666	TRUE
Q9Y2F5	Q9Y2F5	Little elongation complex subunit 1 [OS=Homo sapiens]	ICE1	interactor of little elongation complex ELL subunit 1(ICE1)	0	45.316	6	13	22	13	1	2266	247.7	5.48	48.66	13	0	2096	1822.2	1994.4	2193.2	1843.9	1918.5	2096	1777.51	1986.34	2052.8	1782.08	1979.75		2074.4	0.857982	0.197581	0.955962	0.728555	TRUE
Q86XP3-1	Q86XP3	ATP-dependent RNA helicase DDX42 [OS=Homo sapiens]	DDX42	DEAD-box helicase 42(DDX42)	0	407.564	61	47	172	47	1	938	102.9	7.02	696.93	47	0	18546.2	13998.3	12427.2	19489.7	14163.3	12295.6	18546.2	13655	12377	18242	13688.5	12688.1		18394.1	0.743267	0.00273739	0.681336	0.0096864	TRUE
Q96HR8	Q96HR8	H/ACA ribonucleoprotein complex non-core subunit NAF1 [OS=Homo sapiens]	NAF1	nuclear assembly factor 1 ribonucleoprotein(NAF1)	0	21.089	10	3	9	3	1	494	53.7	4.87	26.03	3	0	727.1	623.6	558.6	773.6	659.1	527.7	727.1	608.306	556.343	724.076	637.004	544.547		725.588	0.858139	0.231567	0.75862	0.128209	TRUE
O00429-4	O00429	Isoform 3 of Dynamin-1-like protein [OS=Homo sapiens]	DNM1L	dynamin 1 like(DNM1L)	0	287.488	65	43	115	2	1	699	78.1	6.81	414	43	0	363.8	312.8	282.1	408.8	347.1	283.3	363.8	305.128	280.96	382.629	335.464	292.345		373.215	0.858208	0.265712	0.768063	0.126903	TRUE
P42229	P42229	Signal transducer and activator of transcription 5A [OS=Homo sapiens]	STAT5A	signal transducer and activator of transcription 5A(STAT5A)	0	329.803	55	38	166	12	1	794	90.6	6.39	652.01	38	26	22483.4	19103.4	20722.3	23391.3	20130.6	19717.9	22483.4	18634.9	20638.6	21893.8	19455.7	20347.4		22188.6	0.858337	0.0587326	0.923582	0.610545	TRUE
Q9UPY5	Q9UPY5	Cystine/glutamate transporter [OS=Homo sapiens]	SLC7A11	solute carrier family 7 member 11(SLC7A11)	0.001	8.672	5	2	2	2	1	501	55.4	9.19	7.34	2	0	594.2	536.8	865.3	678.2	549.8	707.1	594.2	523.635	861.804	634.783	531.368	729.675		614.491	0.858436	0.238534	1.29496	0.117484	FALSE
O94782	O94782	Ubiquitin carboxyl-terminal hydrolase 1 [OS=Homo sapiens]	USP1	ubiquitin specific peptidase 1(USP1)	0	43.234	16	9	15	9	1	785	88.2	5.45	44.81	9	0	1776.5	1522.3	1410.1	1880.2	1604.6	1347.8	1776.5	1484.97	1404.4	1759.83	1550.81	1390.83		1768.17	0.858452	0.199005	0.790433	0.147398	TRUE
Q9UKT4	Q9UKT4	F-box only protein 5 [OS=Homo sapiens]	FBXO5	F-box protein 5(FBXO5)	0	39.607	26	10	21	10	1	447	50.1	8.92	60.24	10	0	1391	1265.7	1040.1	1569.2	1263.1	1039.4	1391	1234.66	1035.9	1468.74	1220.75	1072.58		1429.87	0.858613	0.164698	0.737298	0.0588406	TRUE
P11171-5	P11171	Isoform 5 of Protein 4.1 [OS=Homo sapiens]	EPB41	erythrocyte membrane protein band 4.1(EPB41)	0	328.356	53	35	167	1	1	775	86.6	5.39	711.08	35	0	81.7	62.8	112.6	77.3	73.5	106.9	81.7	61.2598	112.145	72.3514	71.0359	110.313		77.0257	0.858777	0.211324	1.44405	0.0840846	FALSE
Q16222-2	Q16222	Isoform AGX1 of UDP-N-acetylhexosamine pyrophosphorylase [OS=Homo sapiens]	UAP1	UDP-N-acetylglucosamine pyrophosphorylase 1(UAP1)	0	288.053	65	31	155	29	1	505	57	6.38	561.02	31	2	19079.2	16783.6	17274.6	20898.1	17395.6	16877.8	19079.2	16372	17204.8	19560.2	16812.4	17416.6		19319.7	0.858822	0.10517	0.896013	0.559378	TRUE
Q96RK4-2	Q96RK4	Isoform 2 of Bardet-Biedl syndrome 4 protein [OS=Homo sapiens]	BBS4	Bardet-Biedl syndrome 4(BBS4)	0	19.694	14	5	5	5	1	527	59	7.71	15.5	5	0	429.6	398.1	393.1	495.1	391.8	433.1	429.6	388.336	391.512	463.405	378.665	446.927		446.502	0.8589	0.268035	0.938897	0.63729	TRUE
Q9P031	Q9P031	Thyroid transcription factor 1-associated protein 26 [OS=Homo sapiens]	CCDC59	coiled-coil domain containing 59(CCDC59)	0	33.234	34	8	9	8	1	241	28.7	9.88	27.3	8	0	1296.3	1134.3	1126	1410.5	1181.3	1056.7	1296.3	1106.48	1121.45	1320.2	1141.7	1090.44		1308.25	0.85923	0.166499	0.84536	0.257944	TRUE
Q8IWC1	Q8IWC1	MAP7 domain-containing protein 3 [OS=Homo sapiens]	MAP7D3	MAP7 domain containing 3(MAP7D3)	0	69.943	18	15	26	13	1	876	98.4	9.32	74.4	15	0	3053.8	2553.4	2066.7	3239.2	2483.2	2023.7	3053.8	2490.78	2058.35	3031.83	2399.95	2088.31		3042.82	0.803652	0.0535048	0.681385	0.0155985	TRUE
Q66GS9-1	Q66GS9	centrosomal protein of 135 kDa [OS=Homo sapiens]	CEP135	centrosomal protein 135(CEP135)	0	118.903	26	24	37	23	1	1140	133.4	6.21	140.72	24	0	4312.6	3834	3606.1	4575.1	3772.7	3574.2	4312.6	3739.97	3591.53	4282.21	3646.22	3688.31		4297.41	0.859378	0.19176	0.847004	0.258986	TRUE
A6NIH7	A6NIH7	Protein unc-119 homolog B [OS=Homo sapiens]	UNC119B	unc-119 lipid binding chaperone B(UNC119B)	0	46.068	39	7	9	7	1	251	28.1	5.68	46.75	7	0	3545.9	3041.5	2546.1	3635.3	3108.7	2507.1	3545.9	2966.91	2535.81	3402.58	3004.48	2587.14		3474.24	0.859381	0.111286	0.737278	0.0782742	TRUE
Q8N8A6	Q8N8A6	ATP-dependent RNA helicase DDX51 [OS=Homo sapiens]	DDX51	DEAD-box helicase 51(DDX51)	0	109.957	39	19	41	19	1	666	72.4	8.16	145.97	19	0	5012.7	4463.3	4140.5	5511.7	4540.3	4014.6	5012.7	4353.84	4123.77	5158.85	4388.09	4142.77		5085.78	0.859448	0.191978	0.812712	0.157492	TRUE
Q9HD47	Q9HD47	Ran guanine nucleotide release factor [OS=Homo sapiens]	RANGRF	RAN guanine nucleotide release factor(RANGRF)	0	21.803	27	4	8	4	1	186	20.4	4.94	25.02	4	0	347.3	318	351.2	375.1	300.3	330.8	347.3	310.201	349.781	351.087	290.233	341.361		349.193	0.859743	0.270889	0.989627	0.874284	TRUE
Q9BTX7	Q9BTX7	Alpha-tocopherol transfer protein-like [OS=Homo sapiens]	TTPAL	alpha tocopherol transfer protein like(TTPAL)	0.001	11.222	10	3	10	3	1	342	38.5	6.44	14.41	3	0	208.9	166.7	231.5	193.6	178.8	198.2	208.9	162.612	230.565	181.206	172.806	204.528		195.053	0.859811	0.172873	1.11532	0.693757	FALSE
P15056	P15056	serine/threonine-protein kinase B-raf [OS=Homo sapiens]	BRAF	B-Raf proto-oncogene, serine/threonine kinase(BRAF)	0	77.545	24	16	44	9	1	766	84.4	7.53	122.16	16	0	3064.2	2747.8	2660.7	3312.9	2712.6	2653.8	3064.2	2680.41	2649.95	3100.81	2621.66	2738.52		3082.51	0.860026	0.162953	0.874041	0.318698	TRUE
O75319-1	O75319	RNA/RNP complex-1-interacting phosphatase [OS=Homo sapiens]	DUSP11	dual specificity phosphatase 11(DUSP11)	0	39.221	34	8	17	8	1	330	38.9	9.41	66.07	8	0	2026.8	1688	1863.6	1958.1	1731.2	1743.6	2026.8	1646.6	1856.07	1832.75	1673.16	1799.27		1929.77	0.860143	0.2042	0.94709	0.684667	TRUE
O75340-2	O75340	Isoform 2 of Programmed cell death protein 6 [OS=Homo sapiens]	PDCD6	programmed cell death 6(PDCD6)	0	70.114	61	11	43	1	1	189	21.7	5.4	132.3	11	11	10346.2	9830.5	6947.5	10833.1	10101.9	6836.1	10346.2	9589.4	6919.43	10139.6	9763.24	7054.35		10242.9	0.944686	0.53059	0.682121	0.0131974	TRUE
Q6PIY7-2	Q6PIY7	Isoform 2 of Poly(A) RNA polymerase GLD2 [OS=Homo sapiens]	PAPD4	poly(A) RNA polymerase D4, non-canonical(PAPD4)	0	47.13	19	9	21	1	1	480	55.5	9.42	61.22	9	8	2530.1	1980.1	1730.2	2714.2	1956.7	1685.9	2530.1	1931.54	1723.21	2540.44	1891.1	1739.72		2535.27	0.753892	0.0169071	0.682951	0.0386026	TRUE
Q3SY69-1	Q3SY69	Mitochondrial 10-formyltetrahydrofolate dehydrogenase [OS=Homo sapiens]	ALDH1L2	aldehyde dehydrogenase 1 family member L2(ALDH1L2)	0	132.188	34	26	53	26	1	923	101.7	6.52	156.57	26	0	3378.4	5156.5	2375.3	3688.3	4655.9	2230.6	3378.4	5030.04	2365.7	3452.18	4499.81	2301.81		3415.29	1.39517	0.000110668	0.683327	0.034841	FALSE
Q63HK3	Q63HK3	Zinc finger protein with KRAB and SCAN domains 2 [OS=Homo sapiens]	ZKSCAN2	zinc finger with KRAB and SCAN domains 2(ZKSCAN2)	0.007	4.826	4	3	3	3	1	967	110.9	8.35	0	3	0	108.2	95.8	93.1	106.5	88.4	89.8	108.2	93.4505	92.7239	99.6821	85.4364	92.6669		103.941	0.860521	0.263283	0.891808	0.391738	TRUE
Q6P3S1	Q6P3S1	DENN domain-containing protein 1B [OS=Homo sapiens]	DENND1B	DENN domain containing 1B(DENND1B)	0	38.621	19	10	15	10	1	775	86.5	5.83	46.58	10	0	839.1	717.2	888	859	739.1	844.1	839.1	699.61	884.413	804.009	714.322	871.049		821.554	0.860523	0.239252	1.06838	0.810491	FALSE
Q99541	Q99541	perilipin-2 [OS=Homo sapiens]	PLIN2	perilipin 2(PLIN2)	0	58.273	27	10	19	10	1	437	48	6.8	80.64	10	0	2912.2	2457.1	2161.1	2871.9	2506.9	2095.1	2912.2	2396.84	2152.37	2688.05	2422.86	2161.99		2800.12	0.860622	0.164668	0.770387	0.0781208	TRUE
Q2KHM9-1	Q2KHM9	Protein moonraker [OS=Homo sapiens]	KIAA0753	KIAA0753(KIAA0753)	0.001	10.197	6	4	4	4	1	967	109.3	7.68	2.64	4	0	155.4	99.8	109.9	160	119.5	96.1	155.4	97.3524	109.456	149.757	115.494	99.1681		152.579	0.697497	0.0249847	0.683661	0.0367724	TRUE
Q9BW19	Q9BW19	Kinesin-like protein KIFC1 [OS=Homo sapiens]	KIFC1	kinesin family member C1(KIFC1)	0	271.103	59	37	115	37	1	673	73.7	8.98	426.18	37	0	14563.2	16060.6	9848.5	15538.7	16211.8	9782	14563.2	15666.7	9808.71	14543.9	15668.3	10094.3		14553.6	1.07654	0.379321	0.683785	0.0103478	FALSE
Q8IUR0	Q8IUR0	Trafficking protein particle complex subunit 5 [OS=Homo sapiens]	TRAPPC5	trafficking protein particle complex 5(TRAPPC5)	0	31.083	36	8	17	7	1	188	20.8	9.66	52.48	8	0	1708.8	1486.9	1526.5	1800.6	1522.6	1693.1	1708.8	1450.43	1520.33	1685.33	1471.56	1747.15		1697.06	0.860895	0.206539	0.962688	0.762435	TRUE
Q5JPH6	Q5JPH6	Probable glutamate--tRNA ligase, mitochondrial [OS=Homo sapiens]	EARS2	glutamyl-tRNA synthetase 2, mitochondrial(EARS2)	0	81.753	29	14	31	14	1	523	58.7	8.76	99.07	14	0	2584	2318.2	2992.7	2959.5	2430.3	2673.4	2584	2261.35	2980.61	2770.04	2348.82	2758.75		2677.02	0.861064	0.173805	1.07197	0.659442	FALSE
O43148-2	O43148	Isoform 2 of mRNA cap guanine-N7 methyltransferase [OS=Homo sapiens]	RNMT	RNA guanine-7 methyltransferase(RNMT)	0	178.218	52	27	67	26	1	504	57.7	7.69	278.08	27	0	12823.7	11321.6	12398.5	13698.7	11421.7	12302.4	12823.7	11043.9	12348.4	12821.7	11038.8	12695.2		12822.7	0.861078	0.111063	0.976532	0.89695	TRUE
Q9UJS0	Q9UJS0	Calcium-binding mitochondrial carrier protein Aralar2 [OS=Homo sapiens]	SLC25A13	solute carrier family 25 member 13(SLC25A13)	0	200.379	49	31	119	21	1	675	74.1	8.62	386.08	31	10	17054.8	15086.6	16560.4	18617.5	15503.9	16501	17054.8	14716.6	16493.5	17425.6	14984.1	17027.8		17240.2	0.861379	0.111868	0.972183	0.921815	TRUE
Q5VT25-6	Q5VT25	Isoform 6 of Serine/threonine-protein kinase MRCK alpha [OS=Homo sapiens]	CDC42BPA	CDC42 binding protein kinase alpha(CDC42BPA)	0	254.354	32	49	112	40	1	1781	202.7	6.51	357.33	49	9	13734.4	12513.2	12354.7	15415.7	12471.2	12205	13734.4	12206.3	12304.8	14428.8	12053.1	12594.7		14081.6	0.861387	0.111889	0.884112	0.487175	TRUE
Q8NBU5	Q8NBU5	ATPase family aaa domain-containing protein 1 [OS=Homo sapiens]	ATAD1	ATPase family, AAA domain containing 1(ATAD1)	0	65.565	39	12	24	12	1	361	40.7	6.9	79.1	12	0	3125.2	2743.8	2631.7	3318.9	2785.6	2527.8	3125.2	2676.51	2621.07	3106.43	2692.21	2608.5		3115.82	0.861527	0.167298	0.839198	0.20979	TRUE
Q8NEY1	Q8NEY1	neuron navigator 1 [OS=Homo sapiens]	NAV1	neuron navigator 1(NAV1)	0	303.37	35	49	90	49	1	1877	202.3	8.07	375.05	49	0	11392.2	9944.8	9664.2	11905.1	10052	9673.2	11392.2	9700.9	9625.16	11143	9715.01	9982.03		11267.6	0.861583	0.114856	0.870071	0.378172	TRUE
P04350	P04350	Tubulin beta-4A chain [OS=Homo sapiens]	TUBB4A	tubulin beta 4A class IVa(TUBB4A)	0	459.72	83	26	690	4	1	444	49.6	4.88	2440.28	26	0	932.2	804.8	832.5	951.5	812.8	812.7	932.2	785.062	829.137	890.587	785.551	838.646		911.393	0.861655	0.242963	0.914963	0.540335	TRUE
Q14012	Q14012	calcium/calmodulin-dependent protein kinase type 1 [OS=Homo sapiens]	CAMK1	calcium/calmodulin dependent protein kinase I(CAMK1)	0.001	9.039	8	2	3	2	1	370	41.3	5.29	6.57	2	0	61.9	58.1	55.7	72.8	57.3	55.6	61.9	56.6751	55.475	68.1395	55.379	57.3751		65.0197	0.861693	0.220375	0.867814	0.286617	TRUE
P17174	P17174	Aspartate aminotransferase, cytoplasmic [OS=Homo sapiens]	GOT1	glutamic-oxaloacetic transaminase 1(GOT1)	0	220.468	70	27	184	27	1	413	46.2	7.01	620.8	27	0	22152.7	18953.7	21365.7	23347.4	20107.8	20456.1	22152.7	18488.9	21279.4	21852.7	19433.7	21109.2		22002.7	0.861769	0.0647618	0.963257	0.919541	TRUE
Q96AP0	Q96AP0	Adrenocortical dysplasia protein homolog [OS=Homo sapiens]	ACD	adrenocortical dysplasia homolog(ACD)	0	35.966	16	6	21	6	1	544	57.7	6.74	56.64	6	0	1888.8	1611.5	1479.1	1928.1	1666.9	1505.9	1888.8	1571.98	1473.12	1804.67	1611.02	1553.98		1846.73	0.861791	0.209352	0.819583	0.209564	TRUE
Q9NSY0-3	Q9NSY0	Nuclear receptor-binding protein 2 [OS=Homo sapiens]	NRBP2	nuclear receptor binding protein 2(NRBP2)	0	14.923	10	4	4	4	1	501	57.8	6.49	9.49	4	0	592.5	511.1	546.1	590.6	505.8	488.1	592.5	498.565	543.894	552.791	488.843	503.683		572.645	0.862146	0.250603	0.914682	0.513616	TRUE
O14757	O14757	Serine/threonine-protein kinase Chk1 [OS=Homo sapiens]	CHEK1	checkpoint kinase 1(CHEK1)	0	89.966	32	17	42	17	1	476	54.4	8.25	125.83	17	0	3286.5	2893.3	2468.9	3402.9	2853	2391.7	3286.5	2822.34	2458.93	3185.05	2757.35	2468.06		3235.78	0.862188	0.169236	0.761329	0.0674738	TRUE
Q9NYF8-3	Q9NYF8	Isoform 3 of Bcl-2-associated transcription factor 1 [OS=Homo sapiens]	BCLAF1	BCL2 associated transcription factor 1(BCLAF1)	0	225.825	37	34	159	1	1	869	100.2	9.95	474.35	34	0	177	143.7	191	173.2	157.5	183.1	177	140.176	190.228	162.112	152.22	188.946		169.556	0.862239	0.268366	1.11814	0.732756	FALSE
Q9NVP2	Q9NVP2	Histone chaperone ASF1B [OS=Homo sapiens]	ASF1B	anti-silencing function 1B histone chaperone(ASF1B)	0	50.029	52	7	22	6	1	202	22.4	4.56	68.71	7	1	2229.5	1947.9	1825.4	2431.8	2053.9	1821.2	2229.5	1900.13	1818.03	2276.12	1985.04	1879.34		2252.81	0.862294	0.177571	0.820613	0.248138	TRUE
Q8IWZ6-1	Q8IWZ6	Bardet-Biedl syndrome 7 protein [OS=Homo sapiens]	BBS7	Bardet-Biedl syndrome 7(BBS7)	0	21.047	8	5	8	5	1	715	80.3	6.05	17.17	5	0	419.6	336.1	367.2	398.4	367.9	333.3	419.6	327.857	365.717	372.895	355.566	343.941		396.248	0.862369	0.279906	0.895472	0.459514	TRUE
P13674-2	P13674	Isoform 2 of Prolyl 4-hydroxylase subunit alpha-1 [OS=Homo sapiens]	P4HA1	prolyl 4-hydroxylase subunit alpha 1(P4HA1)	0	190.46	59	27	82	1	1	534	60.9	6.01	286.87	27	0	83.9	79.9	76.7	88.7	68.3	59.6	83.9	77.9404	76.3902	83.0216	66.0103	61.5028		83.4608	0.862385	0.268803	0.826094	0.212998	TRUE
Q9NX31	Q9NX31	Oxidative stress-responsive serine-rich protein 1 [OS=Homo sapiens]	OSER1	oxidative stress responsive serine rich 1(OSER1)	0.001	9.284	20	3	3	3	1	292	31.8	8.48	9.52	3	0	171.8	148.7	186.9	183.6	156.6	167.9	171.8	145.053	186.145	171.846	151.35	173.26		171.823	0.862524	0.269217	1.04586	0.968867	FALSE
Q9UL33-1	Q9UL33	Trafficking protein particle complex subunit 2-like protein [OS=Homo sapiens]	TRAPPC2L	trafficking protein particle complex 2 like(TRAPPC2L)	0	54.508	52	7	40	7	1	140	16.1	6.77	113.67	7	0	2333.2	2191.9	2210.1	2705.4	2129.8	2106.5	2333.2	2138.14	2201.17	2532.21	2058.4	2173.75		2432.7	0.862527	0.17829	0.89919	0.526441	TRUE
Q5VVJ2	Q5VVJ2	Histone H2A deubiquitinase MYSM1 [OS=Homo sapiens]	MYSM1	Myb like, SWIRM and MPN domains 1(MYSM1)	0	55.138	22	17	18	17	1	828	95	5.53	55.47	17	0	3612.6	2968.8	2494.8	3949.1	2956.3	2439.4	3612.6	2895.99	2484.72	3696.29	2857.19	2517.28		3654.44	0.787149	0.0182135	0.684373	0.0354285	TRUE
Q86YM7-1	Q86YM7	Homer protein homolog 1 [OS=Homo sapiens]	HOMER1	homer scaffolding protein 1(HOMER1)	0	54.426	47	10	13	10	1	354	40.3	5.44	51.14	10	0	2473.1	2196.2	2407.1	2593.7	2157.1	2379.5	2473.1	2142.34	2397.38	2427.66	2084.78	2455.47		2450.38	0.862545	0.178345	0.990223	0.976583	TRUE
Q6PGP7	Q6PGP7	Tetratricopeptide repeat protein 37 [OS=Homo sapiens]	TTC37	tetratricopeptide repeat domain 37(TTC37)	0	27.582	7	9	9	9	1	1564	175.4	7.53	20.73	9	0	757.8	675.5	721	799.3	662.2	665.7	757.8	658.933	718.087	748.13	640	686.953		752.965	0.862545	0.24591	0.933005	0.611859	TRUE
Q96A72	Q96A72	protein mago nashi homolog 2 [OS=Homo sapiens]	MAGOHB	mago homolog B, exon junction complex core component(MAGOHB)	0	101.665	68	11	103	11	1	148	17.3	6.39	288.98	11	0	10807.1	8967.5	9333.2	11136	9897.7	8818.3	10807.1	8747.57	9295.5	10423.1	9565.88	9099.83		10615.1	0.862613	0.117592	0.86647	0.361838	TRUE
Q969E8	Q969E8	pre-rRNA-processing protein TSR2 homolog [OS=Homo sapiens]	TSR2	TSR2, ribosome maturation factor(TSR2)	0	24.421	15	3	14	3	1	191	20.9	4.39	36.44	3	0	896.4	821.1	857.4	1025.9	828.6	818.3	896.4	800.962	853.936	960.224	800.821	844.425		928.312	0.86274	0.246558	0.914758	0.539545	TRUE
O75347	O75347	Tubulin-specific chaperone A [OS=Homo sapiens]	TBCA	tubulin folding cofactor A(TBCA)	0	89.468	69	13	64	13	1	108	12.8	5.29	195.87	13	0	14408.4	13785.7	9832.4	15026.9	14170.6	9395.3	14408.4	13447.6	9792.68	14064.9	13695.5	9695.25		14236.7	0.953284	0.619984	0.684428	0.0105282	TRUE
Q96AY4	Q96AY4	Tetratricopeptide repeat protein 28 [OS=Homo sapiens]	TTC28	tetratricopeptide repeat domain 28(TTC28)	0	134.524	18	28	36	28	1	2481	270.7	6.89	128.57	28	0	2480.9	2166.6	2350.9	2554.2	2162.5	2286.7	2480.9	2113.46	2341.4	2390.69	2090	2359.7		2435.79	0.862854	0.179305	0.965006	0.844066	TRUE
Q9UPM8-1	Q9UPM8	AP-4 complex subunit epsilon-1 [OS=Homo sapiens]	AP4E1	adaptor related protein complex 4 epsilon 1 subunit(AP4E1)	0	33.702	8	7	16	6	1	1137	127.2	5.99	48.86	7	0	597.1	507.9	499.7	604.5	525.8	474	597.1	495.444	497.681	565.801	508.173	489.133		581.451	0.863028	0.253532	0.84858	0.290368	TRUE
Q9H9L3	Q9H9L3	Interferon-stimulated 20 kDa exonuclease-like 2 [OS=Homo sapiens]	ISG20L2	interferon stimulated exonuclease gene 20 like 2(ISG20L2)	0	60.37	29	8	16	8	1	353	39.1	9.94	74.45	8	0	2217.1	2022	1936.3	2432.6	1972.8	2001.2	2217.1	1972.41	1928.48	2276.87	1906.66	2065.09		2246.98	0.863173	0.180298	0.88865	0.481814	TRUE
Q9BT40	Q9BT40	Inositol polyphosphate 5-phosphatase K [OS=Homo sapiens]	INPP5K	inositol polyphosphate-5-phosphatase K(INPP5K)	0	21.682	12	5	9	4	1	448	51.1	6.54	27.9	5	1	1297.2	1205.1	1485.8	1440	1146	1462.3	1297.2	1175.54	1479.8	1347.81	1107.58	1508.99		1322.51	0.863181	0.178384	1.12997	0.500491	FALSE
Q9BZX2-1	Q9BZX2	Uridine-cytidine kinase 2 [OS=Homo sapiens]	UCK2	uridine-cytidine kinase 2(UCK2)	0	53.525	30	8	41	7	1	261	29.3	6.7	129.97	8	1	3967.4	3378	2847.2	4021.6	3496.4	2593.4	3967.4	3295.15	2835.7	3764.15	3379.18	2676.2		3865.77	0.863261	0.120866	0.71291	0.0550342	TRUE
O60266	O60266	Adenylate cyclase type 3 [OS=Homo sapiens]	ADCY3	adenylate cyclase 3(ADCY3)	0.003	6.656	4	3	4	3	1	1144	128.9	6.58	7.59	3	0	146.4	124.9	148.4	152.8	132.5	146.8	146.4	121.837	147.801	143.018	128.058	151.487		144.709	0.863439	0.271957	1.0341	0.988524	FALSE
Q8N1F8	Q8N1F8	Serine/threonine-protein kinase 11-interacting protein [OS=Homo sapiens]	STK11IP	serine/threonine kinase 11 interacting protein(STK11IP)	0	65.058	14	13	22	13	1	1099	121.3	5.39	71.56	13	0	2943.6	2503.1	3033.6	2951.8	2571.8	2834.1	2943.6	2441.71	3021.35	2762.83	2485.58	2924.58		2853.22	0.863463	0.173024	1.04197	0.846659	FALSE
O14593	O14593	DNA-binding protein RFXANK [OS=Homo sapiens]	RFXANK	regulatory factor X associated ankyrin containing protein(RFXANK)	0.001	7.557	9	2	2	2	1	260	28.1	4.55	6.81	2	0	423.8	400.9	386.1	491.9	385.4	413.7	423.8	391.068	384.54	460.41	372.48	426.908		442.105	0.863537	0.283981	0.91771	0.546959	TRUE
Q8IXK2	Q8IXK2	Polypeptide N-acetylgalactosaminyltransferase 12 [OS=Homo sapiens]	GALNT12	polypeptide N-acetylgalactosaminyltransferase 12(GALNT12)	0	26.559	11	6	15	6	1	581	66.9	6.8	42.09	6	0	1316.3	1231.8	1179.1	1537.3	1218.5	1267.8	1316.3	1201.59	1174.34	1438.89	1177.65	1308.28		1377.59	0.86355	0.179526	0.901069	0.459037	TRUE
P09496-2	P09496	Isoform Non-brain of Clathrin light chain A [OS=Homo sapiens]	CLTA	clathrin light chain A(CLTA)	0	59.013	39	11	45	11	1	218	23.6	4.53	150.54	11	0	5007.8	4719.2	5381.7	5804.7	4569.2	5127.3	5007.8	4603.46	5359.96	5433.09	4416.02	5290.99		5220.45	0.863861	0.206023	1.02012	0.836643	FALSE
Q9BXS9-1	Q9BXS9	Solute carrier family 26 member 6 [OS=Homo sapiens]	slc26a6	solute carrier family 26 member 6(SLC26A6)	0	16.439	8	4	6	4	1	759	82.9	8.37	21.02	4	0	212.6	186.3	188.1	236.2	199.6	184.4	212.6	181.731	187.34	221.079	192.908	190.287		216.839	0.863863	0.185739	0.870753	0.31873	TRUE
Q86X53	Q86X53	Glutamate-rich protein 1 [OS=Homo sapiens]	erich1	glutamate rich 1(ERICH1)	0	48.309	21	9	17	9	1	443	49	4.78	60.96	9	0	1011.3	880.3	812.3	1064.1	906.2	800.2	1011.3	858.71	809.019	995.978	875.82	825.747		1003.64	0.86412	0.191459	0.814419	0.205148	TRUE
Q8TF76-1	Q8TF76	serine/threonine-protein kinase haspin [OS=Homo sapiens]	GSG2	germ cell associated 2, haspin(GSG2)	0.001	8.44	4	2	3	2	1	798	88.4	9.16	11.68	2	0	230.4	201.1	258.2	261.4	221.8	242.4	230.4	196.168	257.157	244.666	214.364	250.139		237.533	0.864159	0.186704	1.06784	0.880212	FALSE
Q99417	Q99417	C-Myc-binding protein [OS=Homo sapiens]	MYCBP	MYC binding protein(MYCBP)	0	71.671	74	8	40	8	1	103	12	5.91	135.08	8	0	6105.2	5756.9	5179.5	6855.2	5385.5	5155.5	6105.2	5615.71	5158.58	6416.34	5204.95	5320.09		6260.77	0.864164	0.173161	0.836851	0.231575	TRUE
O43913	O43913	Origin recognition complex subunit 5 [OS=Homo sapiens]	ORC5	origin recognition complex subunit 5(ORC5)	0	77.323	40	16	31	16	1	435	50.3	7.74	99.12	16	0	6406.9	5660.6	5004.9	6713.3	5634.1	4796.3	6406.9	5521.77	4984.68	6283.53	5445.22	4949.43		6345.21	0.864194	0.173264	0.782803	0.0997722	TRUE
Q9NZB8	Q9NZB8	Molybdenum cofactor biosynthesis protein 1 [OS=Homo sapiens]	MOCS1	molybdenum cofactor synthesis 1(MOCS1)	0	37.59	15	8	19	8	1	636	70.1	9.26	59.12	8	0	637.1	588.9	645.3	749.6	602.8	647	637.1	574.457	642.693	701.612	582.591	667.656		669.356	0.8643	0.257799	0.978813	0.793963	TRUE
Q7L1T6	Q7L1T6	Cytochrome b5 reductase 4 [OS=Homo sapiens]	CYB5R4	cytochrome b5 reductase 4(CYB5R4)	0	56.878	25	11	24	11	1	521	59.4	7.72	68.97	11	0	1660.3	1341.4	1389.4	1598	1468.5	1302.1	1660.3	1308.5	1383.79	1495.7	1419.27	1343.67		1578	0.864313	0.181904	0.864214	0.317797	TRUE
Q9Y5V3-2	Q9Y5V3	Isoform 2 of Melanoma-associated antigen D1 [OS=Homo sapiens]	MAGED1	MAGE family member D1(MAGED1)	0	29.956	11	7	10	6	1	834	91.9	5.82	36.37	7	0	1099.2	965.4	1033.6	1119.5	945.7	1003.4	1099.2	941.723	1029.42	1047.83	913.996	1035.43		1073.52	0.864318	0.192045	0.961727	0.708885	TRUE
Q96S82	Q96S82	ubiquitin-like protein 7 [OS=Homo sapiens]	UBL7	ubiquitin like 7(UBL7)	0	65.891	41	10	19	10	1	380	40.5	5.07	66.47	10	0	2278.6	2043.3	1842.1	2423.7	2004.8	1797.8	2278.6	1993.19	1834.66	2268.54	1937.59	1855.2		2273.57	0.86445	0.184319	0.811467	0.224148	TRUE
Q9BQ15-1	Q9BQ15	SOSS complex subunit B1 [OS=Homo sapiens]	NABP2	nucleic acid binding protein 2(NABP2)	0	42.023	39	4	11	3	1	211	22.3	9.06	53.01	4	0	459.3	402.7	428.8	476.9	403.7	408.9	459.3	392.824	427.068	446.37	390.166	421.954		452.835	0.864542	0.287521	0.937452	0.630936	TRUE
P51178-2	P51178	Isoform 2 of 1-phosphatidylinositol 4,5-bisphosphate phosphodiesterase delta-1 [OS=Homo sapiens]	PLCD1	phospholipase C delta 1(PLCD1)	0	153.997	45	25	88	25	1	777	88.1	7.23	300.88	25	0	9080.5	7833.8	10450.2	9358.1	8051.8	9683.5	9080.5	7641.67	10408	8759.01	7781.87	9992.65		8919.76	0.864572	0.194719	1.14356	0.293644	FALSE
Q9UFG5	Q9UFG5	UPF0449 protein C19orf25 [OS=Homo sapiens]	C19orf25	chromosome 19 open reading frame 25(C19orf25)	0	37.395	64	5	8	5	1	118	12.9	5.07	31.11	5	0	510.7	444.2	409.2	558.5	476.3	415.5	510.7	433.306	407.547	522.746	460.332	428.765		516.723	0.864717	0.259209	0.809246	0.194367	TRUE
Q99623	Q99623	Prohibitin-2 [OS=Homo sapiens]	PHB2	prohibitin 2(PHB2)	0	168.701	75	22	217	22	1	299	33.3	9.83	584.36	22	0	17854.4	16264.9	15524.8	19704.7	16061	15021.2	17854.4	15866	15462.1	18443.2	15522.6	15500.8		18148.8	0.864755	0.121221	0.853026	0.324694	TRUE
Q3B7T1	Q3B7T1	Erythroid differentiation-related factor 1 [OS=Homo sapiens]	EDRF1	erythroid differentiation regulatory factor 1(EDRF1)	0	109.019	22	21	33	21	1	1238	138.4	6.33	113.65	21	0	4796.7	4162.2	3982.8	4978.1	4261.7	3740.1	4796.7	4060.12	3966.71	4659.41	4118.83	3859.51		4728.06	0.864938	0.209562	0.827636	0.19718	TRUE
P57076	P57076	UPF0769 protein C21orf59 [OS=Homo sapiens]	c21orf59	chromosome 21 open reading frame 59(C21orf59)	0	188.358	71	21	67	21	1	290	33.2	7.44	260.86	21	0	7231.9	6518	5642.9	7962	6563.2	5474.7	7231.9	6358.14	5620.1	7452.29	6343.17	5649.48		7342.09	0.864965	0.196123	0.767464	0.102019	TRUE
Q16600	Q16600	Zinc finger protein 239 [OS=Homo sapiens]	ZNF239	zinc finger protein 239(ZNF239)	0	32.52	21	7	9	7	1	458	51.6	7.64	27.48	7	0	654	568.9	507.8	681.7	582.7	468.3	654	554.948	505.749	638.059	563.165	483.251		646.029	0.865373	0.261438	0.765445	0.117457	TRUE
Q9H8W3	Q9H8W3	Protein FAM204A [OS=Homo sapiens]	FAM204A	family with sequence similarity 204 member A(FAM204A)	0	29.724	21	4	9	4	1	233	27	7.91	30.15	4	0	508.2	475.1	427.8	581.3	462.7	397.2	508.2	463.448	426.072	544.086	447.188	409.881		526.143	0.865388	0.26149	0.794416	0.165006	TRUE
Q9UHD1	Q9UHD1	cysteine and histidine-rich domain-containing protein 1 [OS=Homo sapiens]	CHORDC1	cysteine and histidine rich domain containing 1(CHORDC1)	0	247.019	68	18	180	18	1	332	37.5	7.87	571.11	18	0	21652.8	18750.9	17790.9	22677.6	19469.9	16718.1	21652.8	18291	17719	21225.8	18817.2	17251.8		21439.3	0.865424	0.0717336	0.815578	0.105081	TRUE
P04181-1	P04181	Ornithine aminotransferase, mitochondrial [OS=Homo sapiens]	OAT	ornithine aminotransferase(OAT)	0	239.235	85	29	130	28	1	439	48.5	7.03	451.16	29	1	13796.2	12497.3	12804.2	15201	12483.8	12167.9	13796.2	12190.8	12752.5	14227.9	12065.3	12556.4		14012	0.865545	0.123496	0.903111	0.604781	TRUE
Q15811	Q15811	Intersectin-1 [OS=Homo sapiens]	ITSN1	intersectin 1(ITSN1)	0	33.566	5	8	13	7	1	1721	195.3	7.77	37.36	8	0	621.4	557.3	519.5	688.6	571.6	525.4	621.4	543.632	517.401	644.517	552.437	542.174		632.959	0.86583	0.263	0.837002	0.259281	TRUE
O76064	O76064	E3 ubiquitin-protein ligase RNF8 [OS=Homo sapiens]	RNF8	ring finger protein 8(RNF8)	0	19.474	11	4	5	4	1	485	55.5	7.33	16.66	4	0	476.3	441.9	399.9	509.2	407.7	393.5	476.3	431.062	398.285	476.602	394.032	406.063		476.451	0.865875	0.292261	0.844103	0.290573	TRUE
P55263-1	P55263	Adenosine kinase [OS=Homo sapiens]	ADK	adenosine kinase(ADK)	0	187.79	69	22	102	22	1	362	40.5	6.7	332.95	22	0	11388.4	10608.2	9728.8	12805.9	10237	9707.8	11388.4	10348	9689.5	11986.1	9893.81	10017.7		11687.2	0.86598	0.126887	0.843108	0.266832	TRUE
Q9NS87	Q9NS87	Kinesin-like protein KIF15 [OS=Homo sapiens]	KIF15	kinesin family member 15(KIF15)	0	310.327	44	54	106	54	1	1388	160.1	6	387.18	54	0	14927.7	12638.6	13114	15087.7	13273.7	12247	14927.7	12328.6	13061	14121.8	12828.7	12638		14524.8	0.866016	0.124868	0.884663	0.490399	TRUE
Q15038-1	Q15038	DAZ-associated protein 2 [OS=Homo sapiens]	DAZAP2	DAZ associated protein 2(DAZAP2)	0.001	7.743	9	1	3	1	1	168	17.3	7.33	5.86	1	0	17.1	14.8	17.4	24.1	20.6	14.6	17.1	14.437	17.3297	22.5572	19.9094	15.0661		19.8286	0.866083	0.23452	0.816897	0.171602	TRUE
Q9H1J7	Q9H1J7	Protein Wnt-5b [OS=Homo sapiens]	WNT5B	Wnt family member 5B(WNT5B)	0.003	6.283	8	2	2	2	1	359	40.3	8.4	5.42	2	0	22.5	18.6	21	19.8	18	23	22.5	18.1438	20.9152	18.5324	17.3966	23.7343		20.5162	0.866153	0.234749	1.08815	0.860256	FALSE
Q9UBC3	Q9UBC3	DNA (Cytosine-5)-methyltransferase 3B [OS=Homo sapiens]	DNMT3B	DNA methyltransferase 3 beta(DNMT3B)	0	35.871	11	7	12	5	1	853	95.7	8.43	33.91	7	2	1124.4	801.4	821.3	1269.4	840.1	741.2	1124.4	781.745	817.982	1188.14	811.936	764.863		1156.27	0.689149	0.00468358	0.684463	0.0398388	TRUE
O14548	O14548	Cytochrome c oxidase subunit 7A-related protein, mitochondrial [OS=Homo sapiens]	COX7A2L	cytochrome c oxidase subunit 7A2 like(COX7A2L)	0	33.751	57	5	12	5	1	114	12.6	9.42	52.85	5	0	2990.7	2652.6	3347.3	3177.9	2669	3295.2	2990.7	2587.54	3333.78	2974.46	2579.52	3400.4		2982.58	0.866208	0.181396	1.12892	0.479611	FALSE
P20290-1	P20290	transcription factor BTF3 [OS=Homo sapiens]	BTF3	basic transcription factor 3(BTF3)	0	152.394	73	13	67	2	1	206	22.2	9.38	286.45	13	14	7213.8	6342.2	5926.8	7773.7	6586.2	5716	7213.8	6186.66	5902.86	7276.04	6365.4	5898.49		7244.92	0.866266	0.200812	0.814456	0.201695	TRUE
P35527	P35527	Keratin, type I cytoskeletal 9 [OS=Homo sapiens]	KRT9	keratin 9(KRT9)	0	264.168	58	28	90	27	1	623	62	5.24	371.04	28	0	11431.7	10955.9	7189.5	8057.1	9363.6	5663.5	11431.7	10687.2	7160.46	7541.3	9049.69	5844.31		9486.5	1.04026	0.661055	0.685436	0.0142765	FALSE
P35249	P35249	replication factor C subunit 4 [OS=Homo sapiens]	RFC4	replication factor C subunit 4(RFC4)	0	222.602	79	28	89	28	1	363	39.7	8.02	348.73	28	0	14904.6	13259.8	11285	15689.6	13155.6	11313.4	14904.6	12934.6	11239.4	14685.2	12714.6	11674.6		14794.9	0.866825	0.127253	0.774389	0.0856887	TRUE
Q8IY45	Q8IY45	Protein AMN1 homolog [OS=Homo sapiens]	AMN1	antagonist of mitotic exit network 1 homolog(AMN1)	0	12.937	10	2	4	2	1	258	28.4	7.85	14.01	2	0	203.6	158.3	192.9	174.7	169.5	169.2	203.6	154.418	192.121	163.516	163.818	174.602		183.558	0.866852	0.19567	0.998928	0.814368	TRUE
Q96NL6-1	Q96NL6	Sodium channel and clathrin linker 1 [OS=Homo sapiens]	SCLT1	sodium channel and clathrin linker 1(SCLT1)	0	43.253	17	10	14	10	1	688	80.9	6.07	43.58	10	0	698.4	633.1	608.2	716.1	588.8	571.3	698.4	617.573	605.743	670.257	569.061	589.539		684.328	0.867006	0.267045	0.873325	0.364914	TRUE
A8K979-1	A8K979	ERI1 exoribonuclease 2 [OS=Homo sapiens]	ERI2	ERI1 exoribonuclease family member 2(ERI2)	0	12.974	8	4	5	4	1	691	77.4	8.9	5.68	4	0	117.7	115.3	106.4	138.6	105.6	106.2	117.7	112.472	105.97	129.727	102.06	109.591		123.714	0.867051	0.282966	0.871209	0.327889	TRUE
Q969E2-1	Q969E2	Secretory carrier-associated membrane protein 4 [OS=Homo sapiens]	SCAMP4	secretory carrier membrane protein 4(SCAMP4)	0.008	4.26	5	1	2	1	1	229	25.7	8.82	8.27	1	0	610.9	537.3	537.3	648.4	550.6	539.1	610.9	524.123	535.129	606.891	532.141	556.311		608.895	0.867361	0.268273	0.896247	0.443726	TRUE
Q15785	Q15785	Mitochondrial import receptor subunit TOM34 [OS=Homo sapiens]	TOMM34	translocase of outer mitochondrial membrane 34(TOMM34)	0	162.362	73	22	77	22	1	309	34.5	8.98	249.49	22	0	9470.6	8690	7831.5	10472.5	8525.3	7962.7	9470.6	8476.87	7799.86	9802.07	8239.49	8216.92		9636.34	0.867361	0.130862	0.831062	0.225224	TRUE
Q9P2E3-1	Q9P2E3	NFX1-type zinc finger-containing protein 1 [OS=Homo sapiens]	ZNFX1	zinc finger NFX1-type containing 1(ZNFX1)	0	113.569	16	22	35	22	1	1918	220.1	7.3	126.52	22	0	3186.1	2880.4	3215	3423	2827.7	3075.1	3186.1	2809.76	3202.01	3203.87	2732.9	3173.28		3194.98	0.8674	0.185125	0.997703	0.932258	TRUE
Q7Z7M9	Q7Z7M9	Polypeptide N-acetylgalactosaminyltransferase 5 [OS=Homo sapiens]	GALNT5	polypeptide N-acetylgalactosaminyltransferase 5(GALNT5)	0	97.639	24	22	49	21	1	940	106.2	9.47	134.43	22	0	4046.8	3792.8	4745.2	4807.8	3843	4716.8	4046.8	3699.78	4726.03	4500.01	3714.16	4867.39		4273.41	0.867451	0.217992	1.12246	0.439122	FALSE
O60344-4	O60344	Isoform D of Endothelin-converting enzyme 2 [OS=Homo sapiens]	ECE2	endothelin converting enzyme 2(ECE2)	0	14.065	20	4	8	4	1	255	28.3	6.05	24.68	4	0	612.8	530.3	597.7	661.6	570.7	540.5	612.8	517.294	595.285	619.246	551.567	557.756		616.023	0.86755	0.268931	0.935876	0.600518	TRUE
Q9H816	Q9H816	5' exonuclease Apollo [OS=Homo sapiens]	DCLRE1B	DNA cross-link repair 1B(DCLRE1B)	0	14.023	6	3	9	3	1	532	60	8.41	24.9	3	0	567.2	501.8	478.5	605	511	476.6	567.2	489.493	476.567	566.269	493.869	491.816		566.735	0.867568	0.268994	0.854353	0.306771	TRUE
Q659A1-1	Q659A1	Little elongation complex subunit 2 [OS=Homo sapiens]	ice2	interactor of little elongation complex ELL subunit 2(ICE2)	0	68.903	21	12	16	12	1	982	109.9	7.09	77.04	12	0	2162.5	1905.2	1925.7	2271.5	1927.4	2062.5	2162.5	1858.47	1917.92	2126.08	1862.78	2128.35		2144.29	0.867713	0.194885	0.943498	0.734291	TRUE
Q4LDG9-1	Q4LDG9	Dynein light chain 1, axonemal [OS=Homo sapiens]	DNAL1	dynein axonemal light chain 1(DNAL1)	0.001	9.459	17	3	3	3	1	190	21.5	6.1	11.06	3	0	998.8	861.6	851.1	1017.9	882.7	834.9	998.8	840.469	847.662	952.736	853.108	861.555		975.768	0.867817	0.20262	0.875831	0.371079	TRUE
Q8WXG6-1	Q8WXG6	MAP kinase-activating death domain protein [OS=Homo sapiens]	MADD	MAP kinase activating death domain(MADD)	0	177.697	25	33	54	33	1	1647	183.2	6.04	202.83	33	0	3901.2	3456.4	4561.4	4182.8	3530.7	4452	3901.2	3371.63	4542.97	3915.03	3412.33	4594.13		3908.11	0.867934	0.133249	1.16899	0.374313	FALSE
O43264	O43264	Centromere/kinetochore protein zw10 homolog [OS=Homo sapiens]	ZW10	zw10 kinetochore protein(ZW10)	0	251.372	52	34	94	34	1	779	88.8	6.27	340.89	34	0	13294.2	11471	11346.4	13717.3	11892	11065.4	13294.2	11189.7	11300.6	12839.1	11493.3	11418.7		13066.7	0.867971	0.130692	0.869358	0.405142	TRUE
Q86VV8	Q86VV8	Rotatin [OS=Homo sapiens]	RTTN	rotatin(RTTN)	0	31.969	6	9	15	9	1	2226	248.5	6.7	33.03	9	0	241.5	206	201.5	248.4	217.8	200.2	241.5	200.948	200.686	232.498	210.498	206.592		236.999	0.868034	0.199703	0.859239	0.286629	TRUE
Q17RS7	Q17RS7	Flap endonuclease GEN homolog 1 [OS=Homo sapiens]	GEN1	GEN1, Holliday junction 5' flap endonuclease(GEN1)	0	83.999	24	16	35	15	1	908	102.8	7.81	109.43	16	0	2427.7	2133.7	2401.9	2625.1	2236.2	2358.7	2427.7	2081.37	2392.2	2457.05	2161.23	2434		2442.37	0.868541	0.197637	0.988015	0.964896	TRUE
Q8TC05	Q8TC05	Nuclear protein MDM1 [OS=Homo sapiens]	MDM1	Mdm1 nuclear protein(MDM1)	0	19.984	7	5	6	5	1	714	80.7	9.11	14.75	5	0	175.6	153.1	122.9	182.5	156.8	122.9	175.6	149.345	122.404	170.817	151.543	126.824		173.208	0.868574	0.287694	0.719443	0.0605834	TRUE
Q86UW9	Q86UW9	Probable E3 ubiquitin-protein ligase DTX2 [OS=Homo sapiens]	DTX2	deltex E3 ubiquitin ligase 2(DTX2)	0	22.589	14	5	7	5	1	622	67.2	8.47	31.81	5	0	794.4	701.1	736.1	871.6	739.5	682	794.4	683.905	733.126	815.802	714.708	703.773		805.101	0.868595	0.266601	0.892372	0.457096	TRUE
Q13243-1	Q13243	Serine/arginine-rich splicing factor 5 [OS=Homo sapiens]	SRSF5	serine and arginine rich splicing factor 5(SRSF5)	0	65.827	27	8	45	7	1	272	31.2	11.59	139.92	8	0	6252.1	5607.3	4176.4	6580.1	5359.6	4215.1	6252.1	5469.78	4159.53	6158.85	5179.92	4349.67		6205.48	0.858089	0.153418	0.68562	0.0141095	TRUE
Q9H6D7	Q9H6D7	HAUS augmin-like complex subunit 4 [OS=Homo sapiens]	HAUS4	HAUS augmin like complex subunit 4(HAUS4)	0	82.834	42	14	55	14	1	363	42.4	5.68	157.07	14	0	6683.3	6027.2	5211.4	7184.6	5967.1	5328.7	6683.3	5879.38	5190.35	6724.66	5767.05	5498.82		6703.98	0.868621	0.188814	0.797226	0.127017	TRUE
Q9P2G9	Q9P2G9	Kelch-like protein 8 [OS=Homo sapiens]	KLHL8	kelch like family member 8(KLHL8)	0	30.289	10	6	11	6	1	620	68.8	6.58	30.55	6	0	734.7	664.4	595.8	776.3	642.8	587.7	734.7	648.105	593.393	726.603	621.25	606.463		730.651	0.868647	0.266782	0.821086	0.246841	TRUE
Q6N063-1	Q6N063	2-oxoglutarate and iron-dependent oxygenase domain-containing protein 2 [OS=Homo sapiens]	OGFOD2	2-oxoglutarate and iron dependent oxygenase domain containing 2(OGFOD2)	0	54.321	37	10	15	10	1	350	39	5.68	61.01	10	0	1785.9	1557.6	1591.2	1833.1	1576.4	1607.9	1785.9	1519.4	1584.77	1715.75	1523.55	1659.23		1750.82	0.869005	0.233029	0.926422	0.586674	TRUE
Q9BQS7-3	Q9BQS7	Isoform 3 of Hephaestin [OS=Homo sapiens]	HEPH	hephaestin(HEPH)	0	44.098	7	7	16	7	1	1212	136.6	6.28	52.52	7	0	1322.3	1206.4	1144.9	1482.7	1219.4	1216.1	1322.3	1176.81	1140.27	1387.78	1178.52	1254.93		1355.04	0.869101	0.197359	0.883811	0.388959	TRUE
O15488-1	O15488	Glycogenin-2 [OS=Homo sapiens]	GYG2	glycogenin 2(GYG2)	0.001	7.986	8	2	2	2	1	501	55.1	5.1	7.62	2	0	159.7	141.8	164.8	179.4	151.5	155.8	159.7	138.322	164.134	167.915	146.421	160.774		163.808	0.86914	0.289465	0.991738	0.790944	TRUE
Q13356-2	Q13356	Isoform 2 of Peptidyl-prolyl cis-trans isomerase-like 2 [OS=Homo sapiens]	PPIL2	peptidylprolyl isomerase like 2(PPIL2)	0	250.011	63	30	171	1	1	527	59.4	8.75	538.96	30	0	16.1	15.7	19	21.7	16.9	17.3	16.1	15.315	18.9232	20.3108	16.3334	17.8523		18.2054	0.869203	0.244953	1.01002	0.823135	FALSE
P09884	P09884	DNA polymerase alpha catalytic subunit [OS=Homo sapiens]	POLA1	DNA polymerase alpha 1, catalytic subunit(POLA1)	0	256.237	35	45	116	45	1	1462	165.8	5.85	374.69	45	0	14734.4	12350.6	9904.4	15657.8	12358.6	9975.6	14734.4	12047.7	9864.39	14655.4	11944.3	10294.1		14694.9	0.816336	0.0335023	0.6859	0.0109513	TRUE
Q8TE04-1	Q8TE04	Pantothenate kinase 1 [OS=Homo sapiens]	PANK1	pantothenate kinase 1(PANK1)	0	22.262	8	5	8	2	1	598	64.3	7.56	29.25	5	0	325.5	264.6	216.6	319.7	261.4	206.2	325.5	258.111	215.725	299.233	252.637	212.783		312.367	0.817544	0.152639	0.685906	0.0419745	TRUE
Q155Q3-1	Q155Q3	Dixin [OS=Homo sapiens]	DIXDC1	DIX domain containing 1(DIXDC1)	0	13.103	7	4	5	4	1	683	77.4	6.24	10.4	4	0	504.6	436.6	476	509.5	442.5	435	504.6	425.892	474.077	476.883	427.665	448.888		490.741	0.869661	0.276335	0.940378	0.619802	TRUE
Q13557-11	Q13557	Isoform Delta 11 of Calcium/calmodulin-dependent protein kinase type II subunit delta [OS=Homo sapiens]	CAMK2D	calcium/calmodulin dependent protein kinase II delta(CAMK2D)	0	35.211	12	6	18	1	1	524	59.1	7.56	47.79	6	0	78.9	66	90.8	72.2	65.2	85.7	78.9	64.3813	90.4332	67.5779	63.0142	88.436		73.2389	0.869725	0.246731	1.22113	0.449802	FALSE
Q92503-2	Q92503	Isoform 2 of SEC14-like protein 1 [OS=Homo sapiens]	SEC14L1	SEC14 like lipid binding 1(SEC14L1)	0	38.967	15	8	12	8	1	719	81.8	6.51	34.3	8	0	611.1	566.7	518.2	664.6	537.9	555.4	611.1	552.801	516.107	622.054	519.867	573.132		616.577	0.869858	0.277032	0.883295	0.398059	TRUE
Q9UMS4	Q9UMS4	Pre-mRNA-processing factor 19 [OS=Homo sapiens]	PRPF19	pre-mRNA processing factor 19(PRPF19)	0	223.487	55	19	139	19	1	504	55.1	6.61	519.49	19	0	17618.2	16107.9	15237.4	19533.1	16057	15163.9	17618.2	15712.8	15175.8	18282.6	15518.7	15648		17950.4	0.869939	0.136763	0.858584	0.350817	TRUE
Q99569	Q99569	Plakophilin-4 [OS=Homo sapiens]	PKP4	plakophilin 4(PKP4)	0	66.25	21	17	20	17	1	1192	131.8	8.94	70.61	17	0	1943	1752.6	1541.7	2118.2	1765.4	1483.2	1943	1709.62	1535.47	1982.6	1706.22	1530.55		1962.8	0.870143	0.236931	0.781034	0.130702	TRUE
Q8NBP7-1	Q8NBP7	Proprotein convertase subtilisin/kexin type 9 [OS=Homo sapiens]	PCSK9	proprotein convertase subtilisin/kexin type 9(PCSK9)	0	14.324	5	2	3	2	1	692	74.2	6.61	13.47	2	0	341.4	300.7	266.2	358.8	306.3	256.1	341.4	293.325	265.125	335.83	296.031	264.276		338.615	0.870245	0.308167	0.781715	0.149266	TRUE
Q96KS0-1	Q96KS0	egl nine homolog 2 [OS=Homo sapiens]	EGLN2	egl-9 family hypoxia inducible factor 2(EGLN2)	0.004	6.135	5	2	2	2	1	407	43.6	7.91	3.49	2	0	110.7	103.6	87.3	133.1	107.3	82.6	110.7	101.059	86.9473	124.579	103.703	85.2371		117.64	0.870294	0.293099	0.73183	0.0713539	TRUE
Q9Y312	Q9Y312	Protein AAR2 homolog [OS=Homo sapiens]	AAR2	AAR2 splicing factor homolog(AAR2)	0	85.811	42	12	28	12	1	384	43.4	5.96	103.23	12	0	2888.8	2533.7	2919.7	3043.5	2609.5	2822.4	2888.8	2471.56	2907.91	2848.66	2522.02	2912.51		2868.73	0.870346	0.194579	1.01446	0.975354	FALSE
Q6PML9	Q6PML9	zinc transporter 9 [OS=Homo sapiens]	SLC30A9	solute carrier family 30 member 9(SLC30A9)	0	30.938	15	8	15	8	1	568	63.5	8.32	39.24	8	0	1805	1624	1281.6	2162.3	1475	1312.2	1805	1584.17	1276.42	2023.87	1425.55	1354.09		1914.44	0.786059	0.0556074	0.687021	0.0325921	TRUE
Q16385-2	Q16385	Isoform 2 of Protein SSX2 [OS=Homo sapiens]	Ssx2	SSX family member 2(SSX2)	0	77.282	49	13	42	10	1	223	25.2	8.5	124.2	13	3	4984.6	4507	4108	5640.5	4695.4	3943	4984.6	4396.46	4091.4	5279.41	4537.99	4068.88		5132	0.870464	0.228415	0.795039	0.118686	TRUE
Q9Y4G2	Q9Y4G2	Pleckstrin homology domain-containing family M member 1 [OS=Homo sapiens]	PLEKHM1	pleckstrin homology and RUN domain containing M1(PLEKHM1)	0	32.837	9	7	8	7	1	1056	117.4	6.52	27.41	7	0	308.7	276.2	281.3	334.2	281	301.8	308.7	269.426	280.164	312.805	271.58	311.435		310.753	0.870476	0.309024	0.951881	0.695568	TRUE
Q8N543	Q8N543	prolyl 3-hydroxylase OGFOD1 [OS=Homo sapiens]	OGFOD1	2-oxoglutarate and iron dependent oxygenase domain containing 1(OGFOD1)	0	154.259	44	22	60	22	1	542	63.2	5.11	180.72	22	0	8657.4	7387.2	7111.7	9014.1	7940.6	6725.9	8657.4	7206.03	7082.97	8437.04	7674.39	6940.63		8547.22	0.870483	0.216582	0.820361	0.218059	TRUE
Q9NQG7-4	Q9NQG7	Isoform 4 of Hermansky-Pudlak syndrome 4 protein [OS=Homo sapiens]	HPS4	HPS4, biogenesis of lysosomal organelles complex 3 subunit 2(HPS4)	0.001	10.451	2	1	4	1	1	721	78.6	5.74	14.53	1	0	187.7	167.8	141.7	193	162.4	138.9	187.7	163.685	141.128	180.645	156.956	143.335		184.172	0.87049	0.20828	0.772272	0.113478	TRUE
Q96HR9-2	Q96HR9	Isoform 2 of Receptor expression-enhancing protein 6 [OS=Homo sapiens]	REEP6	receptor accessory protein 6(REEP6)	0	15.38	20	4	8	4	1	184	20.7	8.56	21.23	4	0	392.3	423.4	478.8	588.7	422.3	456.4	392.3	413.016	476.866	551.013	408.142	470.971		471.656	0.870505	0.30913	1.0048	0.948535	FALSE
P57105	P57105	Synaptojanin-2-binding protein [OS=Homo sapiens]	SYNJ2BP	synaptojanin 2 binding protein(SYNJ2BP)	0	21.01	24	3	6	3	1	145	15.9	6.3	19.67	3	0	129.1	115.1	115.4	142.2	120	112.5	129.1	112.277	114.934	133.097	115.977	116.092		131.098	0.870546	0.293897	0.881115	0.357704	TRUE
O75716	O75716	Serine/threonine-protein kinase 16 [OS=Homo sapiens]	STK16	serine/threonine kinase 16(STK16)	0.001	7.903	8	2	2	2	1	305	34.6	6.9	7.06	2	0	380.5	319	365.2	366.5	329.8	383	380.5	311.176	363.725	343.037	318.744	395.228		361.769	0.870611	0.309525	1.04895	0.878047	FALSE
Q3SXY8	Q3SXY8	ADP-ribosylation factor-like protein 13B [OS=Homo sapiens]	ARL13B	ADP ribosylation factor like GTPase 13B(ARL13B)	0.001	12.087	11	3	5	3	1	428	48.6	6.62	16.53	3	0	327.8	279.4	286.4	316.8	280.4	279.8	327.8	272.548	285.243	296.519	271	288.733		312.16	0.870624	0.309572	0.919363	0.553773	TRUE
Q9H7P9-1	Q9H7P9	Pleckstrin homology domain-containing family G member 2 [OS=Homo sapiens]	PLEKHG2	pleckstrin homology and RhoGEF domain containing G2(PLEKHG2)	0	30.152	9	7	10	7	1	1386	147.9	5.86	33.68	7	0	553.2	483.4	538.6	562.7	485	547.5	553.2	471.544	536.424	526.677	468.74	564.979		539.939	0.870733	0.280148	1.01993	0.992192	FALSE
Q6IQ26	Q6IQ26	DENN domain-containing protein 5A [OS=Homo sapiens]	DENND5A	DENN domain containing 5A(DENND5A)	0	20.787	6	5	7	5	1	1287	147	6.65	17.5	5	0	575.7	469.7	363.3	566.1	457.6	386.2	575.7	458.18	361.832	529.859	442.259	398.53		552.78	0.814465	0.125656	0.687762	0.0413078	TRUE
Q9Y297	Q9Y297	F-box/WD repeat-containing protein 1A [OS=Homo sapiens]	BTRC	beta-transducin repeat containing E3 ubiquitin protein ligase(BTRC)	0	48.802	17	9	20	4	1	605	68.8	7.96	66.82	9	0	778	669.6	888.8	779.4	682.9	844	778	653.178	885.209	729.504	660.006	870.945		753.752	0.871098	0.275501	1.16494	0.470725	FALSE
Q6PCB5-1	Q6PCB5	Round spermatid basic protein 1-like protein [OS=Homo sapiens]	RSBN1L	round spermatid basic protein 1 like(RSBN1L)	0	132.25	32	21	54	21	1	846	94.8	8.78	200.41	21	0	5919.6	5232.3	4520.9	6328.5	5394.3	4398	5919.6	5103.98	4502.64	5923.36	5213.46	4538.41		5921.48	0.871187	0.198284	0.763411	0.0707169	TRUE
Q5EBL4-1	Q5EBL4	RILP-like protein 1 [OS=Homo sapiens]	RILPL1	Rab interacting lysosomal protein like 1(RILPL1)	0	37.656	25	10	14	10	1	403	47.1	5.21	37.53	10	0	1033.6	945	846.9	1133.8	934.6	820.4	1033.6	921.824	843.479	1061.22	903.268	846.592		1047.41	0.871242	0.213374	0.806787	0.189075	TRUE
Q9UMX1	Q9UMX1	Suppressor of fused homolog [OS=Homo sapiens]	sufu	SUFU negative regulator of hedgehog signaling(SUFU)	0	18.437	8	3	7	3	1	484	53.9	5.33	21.06	3	0	216.7	182.7	165.9	201.3	180.8	169.7	216.7	178.219	165.23	188.413	174.739	175.118		202.557	0.871258	0.211014	0.84013	0.238321	TRUE
Q8WUY8	Q8WUY8	N-acetyltransferase 14 [OS=Homo sapiens]	NAT14	N-acetyltransferase 14 (putative)(NAT14)	0	15.367	27	4	6	4	1	206	21.6	10.74	19.91	4	0	451.2	419.4	429.9	524.2	425.8	452.7	451.2	409.114	428.163	490.642	411.525	467.153		470.921	0.871313	0.312139	0.950601	0.689738	TRUE
P59817	P59817	Zinc finger protein 280A [OS=Homo sapiens]	ZNF280A	zinc finger protein 280A(ZNF280A)	0	23.054	11	5	9	4	1	542	60.8	8.76	22.75	5	0	385.5	339.7	348.7	386	330.4	341.8	385.5	331.369	347.291	361.289	319.323	352.712		373.395	0.87132	0.312164	0.937351	0.630492	TRUE
Q9NYG5	Q9NYG5	Anaphase-promoting complex subunit 11 [OS=Homo sapiens]	ANAPC11	anaphase promoting complex subunit 11(ANAPC11)	0	21.107	31	2	16	2	1	84	9.8	7.77	29.75	2	0	391.2	361.6	309.6	418.3	340.7	311.1	391.2	352.732	308.349	391.521	329.278	321.032		391.361	0.871332	0.312207	0.804094	0.192257	TRUE
Q9NYL2	Q9NYL2	mitogen-activated protein kinase kinase kinase 20 [OS=Homo sapiens]	ZAK	sterile alpha motif and leucine zipper containing kinase AZK(ZAK)	0	143.264	45	29	57	18	1	800	91.1	7.87	178.97	29	12	4750.5	4354.5	4321.9	5380	4429	4118.4	4750.5	4247.7	4304.44	5035.58	4280.52	4249.88		4893.04	0.871464	0.231952	0.874132	0.366248	TRUE
P0DI81-3	P0DI81	Isoform 3 of Trafficking protein particle complex subunit 2 [OS=Homo sapiens]	TRAPPC2	trafficking protein particle complex 2(TRAPPC2)	0	14.898	13	2	12	2	1	174	20.4	7.02	30.74	2	0	589.6	535	596.7	644.5	535.6	581.9	589.6	521.879	594.289	603.24	517.644	600.478		596.42	0.871469	0.282784	1.00162	0.903078	FALSE
Q9NS23-4	Q9NS23	Isoform C of Ras association domain-containing protein 1 [OS=Homo sapiens]	RASSF1	Ras association domain family member 1(RASSF1)	0	20.252	27	7	16	7	1	270	31.2	8.24	35.64	7	0	1041.3	1012.5	861.6	1213.7	941.4	861.8	1041.3	987.668	858.119	1136	909.84	889.314		1088.65	0.871495	0.214187	0.802568	0.180598	TRUE
P21127-3	P21127	Isoform 2 of Cyclin-dependent kinase 11B [OS=Homo sapiens]	CDK11B	cyclin dependent kinase 11B(CDK11B)	0	170.354	41	35	89	4	1	781	91.2	5.41	269.42	35	32	13284.2	11611.6	10036.4	14081.7	12144.9	9766.1	13284.2	11326.8	9995.86	13180.2	11737.7	10077.9		13232.2	0.871531	0.141831	0.758518	0.0619471	TRUE
P09110-1	P09110	3-ketoacyl-CoA thiolase, peroxisomal [OS=Homo sapiens]	ACAA1	acetyl-CoA acyltransferase 1(ACAA1)	0	183.287	69	19	59	19	1	424	44.3	8.44	246.67	19	0	5505.6	4910.8	5341.7	5906.9	4993.9	5495.9	5505.6	4790.36	5320.12	5528.75	4826.48	5671.36		5517.18	0.871537	0.199601	0.996115	0.913302	TRUE
Q9Y4F3-5	Q9Y4F3	Isoform 4 of Meiosis regulator and mRNA stability factor 1 [OS=Homo sapiens]	KIAA0430	KIAA0430(KIAA0430)	0	94.816	15	21	40	1	1	1742	192.7	7.87	136.06	21	0	37.9	35.8	36.6	47.1	37.8	36.8	37.9	34.922	36.4521	44.0848	36.5328	37.9749		40.9924	0.871562	0.253055	0.907815	0.407272	TRUE
Q9H6S3-3	Q9H6S3	Isoform 3 of Epidermal growth factor receptor kinase substrate 8-like protein 2 [OS=Homo sapiens]	EPS8L2	EPS8 like 2(EPS8L2)	0	27.934	13	8	11	8	1	731	82.3	7.03	30.71	8	0	1030.1	901.7	1136.4	1068	920.6	1126	1030.1	879.586	1131.81	999.629	889.737	1161.95		1014.86	0.871704	0.214857	1.13008	0.534775	FALSE
Q7Z2E3-1	Q7Z2E3	Aprataxin [OS=Homo sapiens]	APTX	aprataxin(APTX)	0	55.08	29	8	24	8	1	356	40.7	9.17	83.87	8	0	2692.2	2392.9	2595.2	2898.9	2460.5	2407.9	2692.2	2334.21	2584.72	2713.32	2378.01	2484.77		2702.76	0.871744	0.208545	0.937836	0.706179	TRUE
Q7Z3K6-2	Q7Z3K6	Isoform 2 of Mesoderm induction early response protein 3 [OS=Homo sapiens]	MIER3	MIER family member 3(MIER3)	0	19.652	12	5	13	5	1	555	62	4.51	34.18	5	0	2465.1	1974.1	1924.5	2321.1	2190.6	1754.8	2465.1	1925.68	1916.73	2172.51	2117.16	1810.82		2318.8	0.871752	0.208576	0.803765	0.205269	TRUE
P50542-2	P50542	Isoform 2 of Peroxisomal targeting signal 1 receptor [OS=Homo sapiens]	PEX5	peroxisomal biogenesis factor 5(PEX5)	0	99.237	43	15	35	1	1	602	66.8	4.53	107.59	15	0	42.5	38.4	51.2	50.6	42.3	45	42.5	37.4582	50.9932	47.3607	40.8819	46.4367		44.9303	0.871795	0.253868	1.08423	0.873694	FALSE
Q13951-2	Q13951	Isoform 2 of Core-binding factor subunit beta [OS=Homo sapiens]	CBFB	core-binding factor beta subunit(CBFB)	0	53.706	45	8	21	2	1	187	22	5.58	71.63	8	7	3154.5	2789.7	3238.4	3245.3	2770.2	3139.4	3154.5	2721.28	3225.32	3037.54	2677.33	3239.63		3096.02	0.871863	0.199583	1.04407	0.83694	FALSE
O96011-1	O96011	Peroxisomal membrane protein 11B [OS=Homo sapiens]	PEX11B	peroxisomal biogenesis factor 11 beta(PEX11B)	0	33.824	33	6	16	6	1	259	28.4	9.85	51.07	6	0	747.9	682.4	869.4	859	711.5	893.6	747.9	665.664	865.888	804.009	687.647	922.129		775.954	0.87203	0.278867	1.15214	0.510881	FALSE
O60762	O60762	Dolichol-phosphate mannosyltransferase subunit 1 [OS=Homo sapiens]	DPM1	dolichyl-phosphate mannosyltransferase subunit 1, catalytic(DPM1)	0	55.456	35	9	30	9	1	260	29.6	9.57	99.81	9	0	3842.5	3599.1	3869.9	4485	3622.8	4057.3	3842.5	3510.83	3854.27	4197.88	3501.35	4186.83		4020.19	0.87212	0.145158	1.00009	0.953195	FALSE
Q712K3	Q712K3	Ubiquitin-conjugating enzyme E2 R2 [OS=Homo sapiens]	UBE2R2	ubiquitin conjugating enzyme E2 R2(UBE2R2)	0	30.028	22	6	11	5	1	238	27.1	4.42	45.06	6	0	1860.3	1624.3	1523.1	1913.1	1655.1	1534.4	1860.3	1584.46	1516.95	1790.63	1599.61	1583.39		1825.46	0.872128	0.243846	0.849191	0.290193	TRUE
Q9BS18	Q9BS18	Anaphase-promoting complex subunit 13 [OS=Homo sapiens]	ANAPC13	anaphase promoting complex subunit 13(ANAPC13)	0	15.532	86	4	4	4	1	74	8.5	4.18	12.16	4	0	68.2	63	65.4	77.6	63.5	66.5	68.2	61.4549	65.1358	72.6322	61.3712	68.6231		70.4161	0.872145	0.255087	0.949775	0.561752	TRUE
Q13033-2	Q13033	Isoform Alpha of Striatin-3 [OS=Homo sapiens]	STRN3	striatin 3(STRN3)	0	133.595	31	18	64	1	1	713	77.7	5.26	230.05	18	0	533.8	488	519.4	565.9	467.2	497.9	533.8	476.032	517.302	529.672	451.537	513.796		531.736	0.872208	0.28545	0.969558	0.750675	TRUE
Q9NZJ9-2	Q9NZJ9	Isoform 2 of Diphosphoinositol polyphosphate phosphohydrolase 2 [OS=Homo sapiens]	NUDT4	nudix hydrolase 4(NUDT4)	0	79.63	70	8	50	1	1	181	20.4	6.35	157.63	8	0	479.3	416.6	507.7	506	439.7	507.1	479.3	406.383	505.649	473.607	424.959	523.29		476.453	0.872427	0.316318	1.07979	0.768845	FALSE
Q15717-2	Q15717	Isoform 2 of ELAV-like protein 1 [OS=Homo sapiens]	ELAVL1	ELAV like RNA binding protein 1(ELAVL1)	0	124.36	49	16	112	15	1	353	39	9.45	356	16	1	12188.2	12844.9	8555.3	14286.6	11739.1	8778.6	12188.2	12529.9	8520.74	13372	11345.5	9058.86		12780.1	0.934086	0.468826	0.687773	0.0115115	TRUE
Q7Z6Z7	Q7Z6Z7	E3 ubiquitin-protein ligase HUWE1 [OS=Homo sapiens]	HUWE1	HECT, UBA and WWE domain containing 1, E3 ubiquitin protein ligase(HUWE1)	0	932.47	41	127	380	127	1	4374	481.6	5.22	1404.36	127	0	40935.8	36369.4	33179.5	43040.1	36620.3	32821.9	40935.8	35477.4	33045.5	40284.8	35392.6	33869.8		40610.3	0.872563	0.087122	0.823871	0.124692	TRUE
Q9BVP2	Q9BVP2	Guanine nucleotide-binding protein-like 3 [OS=Homo sapiens]	GNL3	G protein nucleolar 3(GNL3)	0	202.42	52	28	104	27	1	549	62	9.16	359.65	28	1	14040.5	12284.5	12772.7	14679	12685.1	11807.9	14040.5	11983.2	12721.1	13739.3	12259.8	12184.9		13889.9	0.872687	0.145601	0.896551	0.562757	TRUE
Q5T3U5	Q5T3U5	Multidrug resistance-associated protein 7 [OS=Homo sapiens]	ABCC10	ATP binding cassette subfamily C member 10(ABCC10)	0	18.544	4	6	9	5	1	1492	161.5	7.08	21.57	6	0	402.9	379.3	361.3	449.3	360.7	355.5	402.9	369.998	359.84	420.537	348.608	366.85		411.718	0.87269	0.317311	0.882509	0.412387	TRUE
Q9P215	Q9P215	Pogo transposable element with KRAB domain [OS=Homo sapiens]	POGK	pogo transposable element with KRAB domain(POGK)	0	41.528	19	10	13	10	1	609	69.4	5.14	38.95	10	0	1513.5	1325.8	1579.2	1538	1328.9	1445	1513.5	1293.28	1572.82	1439.54	1284.35	1491.13		1476.52	0.872874	0.210202	1.03756	0.865779	FALSE
Q9NZN3	Q9NZN3	EH domain-containing protein 3 [OS=Homo sapiens]	EHD3	EH domain containing 3(EHD3)	0	73.394	27	15	40	1	1	535	60.8	6.57	107.35	15	0	30.2	24.6	39.7	23	21.9	33.8	30.2	23.9967	39.5396	21.5276	21.1658	34.8791		25.8638	0.873083	0.258379	1.43867	0.0883828	FALSE
P24311	P24311	Cytochrome c oxidase subunit 7B, mitochondrial [OS=Homo sapiens]	COX7B	cytochrome c oxidase subunit 7B(COX7B)	0.009	4.087	10	2	2	2	1	80	9.2	10.27	4.67	2	0	201.3	263.6	342.6	415.8	267.4	239.5	201.3	257.135	341.216	389.181	258.435	247.146		295.241	0.873136	0.217815	0.996411	0.80277	TRUE
Q9UK73	Q9UK73	Protein fem-1 homolog B [OS=Homo sapiens]	FEM1B	fem-1 homolog B(FEM1B)	0	50.74	19	10	24	10	1	627	70.2	6.61	80.85	10	0	2065.5	1739.3	1611.2	2008.2	1809.4	1535.9	2065.5	1696.64	1604.69	1879.64	1748.74	1584.93		1972.57	0.873324	0.248079	0.808495	0.183993	TRUE
P30419	P30419	glycylpeptide N-tetradecanoyltransferase 1 [OS=Homo sapiens]	NMT1	N-myristoyltransferase 1(NMT1)	0	176.621	44	21	118	16	1	496	56.8	7.8	379.03	21	5	10275.9	9272.3	11077.3	11458.2	9618	10404	10275.9	9044.89	11032.6	10724.7	9295.56	10736.2		10500.3	0.873331	0.149165	1.03658	0.668744	FALSE
Q8WXF3	Q8WXF3	Relaxin-3 [OS=Homo sapiens]	RLN3	relaxin 3(RLN3)	0.001	12.37	15	2	9	2	1	142	15.4	5.55	20.45	2	0	84.8	77.4	119.8	101.2	84.1	129.3	84.8	75.5017	119.316	94.7214	81.2806	133.428		89.7607	0.873335	0.302824	1.40788	0.120234	FALSE
O43156	O43156	TELO2-interacting protein 1 homolog [OS=Homo sapiens]	TTI1	TELO2 interacting protein 1(TTI1)	0	154.64	29	23	64	23	1	1089	122	5.97	226.23	23	0	9124.5	8069.7	8023.1	9535.8	8170.3	7829.7	9124.5	7871.79	7990.69	8925.34	7896.39	8079.67		9024.92	0.873591	0.150004	0.890333	0.478267	TRUE
O95801	O95801	Tetratricopeptide repeat protein 4 [OS=Homo sapiens]	TTC4	tetratricopeptide repeat domain 4(TTC4)	0	172.774	66	23	91	23	1	387	44.7	5.6	354.44	23	0	11484.1	10047	9955.7	12438.7	10766.3	9380.2	11484.1	9800.59	9915.48	11642.4	10405.4	9679.67		11563.2	0.873714	0.150403	0.847303	0.28249	TRUE
O75570	O75570	Peptide chain release factor 1, mitochondrial [OS=Homo sapiens]	MTRF1	mitochondrial translation release factor 1(MTRF1)	0	15.12	10	3	8	3	1	445	52.3	8.5	26.07	3	0	255.2	244	213.1	288.9	228.9	234.3	255.2	238.016	212.239	270.405	221.226	241.78		262.803	0.873739	0.220032	0.863803	0.299082	TRUE
O00541-2	O00541	Isoform 2 of Pescadillo homolog [OS=Homo sapiens]	PES1	pescadillo ribosomal biogenesis factor 1(PES1)	0	117.938	39	21	66	1	1	583	67.4	7.53	201.24	21	0	64	58.8	58.4	61.2	50.3	59	64	57.3579	58.1641	57.2821	48.6137	60.8836		60.641	0.873761	0.260778	0.981577	0.695113	TRUE
Q14019	Q14019	coactosin-like protein [OS=Homo sapiens]	COTL1	coactosin like F-actin binding protein 1(COTL1)	0	77.471	79	16	49	16	1	142	15.9	5.67	153.47	16	0	7678	7099.7	5985.5	8363.9	6853.3	5891.2	7678	6925.58	5961.32	7828.46	6623.54	6079.28		7753.23	0.873773	0.229487	0.776489	0.117276	TRUE
O15117-3	O15117	Isoform 3 of FYN-binding protein [OS=Homo sapiens]	FYB	FYN binding protein(FYB)	0	69.142	23	16	33	16	1	839	91.6	6.9	94.07	16	0	2895	2599.8	3741.2	3146.3	2657.2	3905.9	2895	2536.04	3726.09	2944.88	2568.12	4030.6		2919.94	0.874017	0.206852	1.32823	0.0595535	FALSE
Q96PU8	Q96PU8	protein quaking [OS=Homo sapiens]	QKI	QKI, KH domain containing RNA binding(QKI)	0	83.394	46	14	34	14	1	341	37.6	8.56	137.32	14	0	8296.3	7260.7	6392.3	8402.2	7287.2	6141.8	8296.3	7082.63	6366.48	7864.31	7042.9	6337.88		8080.3	0.874072	0.230685	0.786131	0.135497	TRUE
Q8N0W3-2	Q8N0W3	Isoform 2 of L-fucose kinase [OS=Homo sapiens]	FUK	fucokinase(FUK)	0	63.616	19	12	18	12	1	1090	118.3	6.43	73.86	12	0	1422.3	1236.7	1268.9	1463.8	1277.7	1277.3	1422.3	1206.37	1263.77	1370.09	1234.87	1318.08		1396.2	0.874246	0.215015	0.924603	0.565068	TRUE
Q9NYV6	Q9NYV6	RNA polymerase I-specific transcription initiation factor RRN3 [OS=Homo sapiens]	RRN3	RRN3 homolog, RNA polymerase I transcription factor(RRN3)	0	38.245	15	9	14	9	1	651	74.1	5.63	42.5	9	0	1691.4	1571.8	1413.5	1859.3	1518	1367.4	1691.4	1533.25	1407.79	1740.27	1467.11	1411.06		1715.84	0.874315	0.251626	0.821421	0.21404	TRUE
Q8NCJ5	Q8NCJ5	SPRY domain-containing protein 3 [OS=Homo sapiens]	spryd3	SPRY domain containing 3(SPRYD3)	0.001	8.425	6	2	2	2	1	442	49.7	6.16	7.42	2	0	40.3	36.8	52.6	45.2	37.6	37.4	40.3	35.8975	52.3875	42.3064	36.3395	38.594		41.3032	0.874472	0.263305	1.10139	0.815182	FALSE
Q9NZ71-2	Q9NZ71	Isoform 1 of Regulator of telomere elongation helicase 1 [OS=Homo sapiens]	RTEL1	regulator of telomere elongation helicase 1(RTEL1)	0	44.534	10	11	13	11	1	1400	152.3	8.34	44.02	11	0	1110.3	964.9	1012.3	1161.1	1014.2	955.7	1110.3	941.236	1008.21	1086.77	980.199	986.212		1098.53	0.874545	0.224132	0.907765	0.483475	TRUE
Q9NVR5	Q9NVR5	Protein kintoun [OS=Homo sapiens]	DNAAF2	dynein axonemal assembly factor 2(DNAAF2)	0	67.518	25	12	16	12	1	837	91.1	5.2	60.12	12	0	1432.5	1274.1	1226	1555.9	1328.2	1197.8	1432.5	1242.85	1221.05	1456.29	1283.67	1236.04		1444.4	0.874595	0.216254	0.850558	0.273606	TRUE
O43175	O43175	D-3-phosphoglycerate dehydrogenase [OS=Homo sapiens]	PHGDH	phosphoglycerate dehydrogenase(PHGDH)	0	287	56	28	254	28	1	533	56.6	6.71	858.16	28	0	27415.6	35445.5	19004.9	28857.1	33738	17936.3	27415.6	34576.2	18928.1	27009.7	32606.9	18508.9		27212.7	1.23441	0.000504137	0.687861	0.00333567	FALSE
Q5H9U9-1	Q5H9U9	Probable ATP-dependent RNA helicase DDX60-like [OS=Homo sapiens]	DDX60L	DEAD-box helicase 60-like(DDX60L)	0.001	8.99	2	3	5	3	1	1706	197.5	8.29	9.4	3	0	115.2	111.1	112.9	129.7	102	109.5	115.2	108.375	112.444	121.397	98.5805	112.996		118.298	0.874719	0.307318	0.952844	0.620416	TRUE
Q8TEP8-3	Q8TEP8	Isoform 3 of Centrosomal protein of 192 kDa [OS=Homo sapiens]	CEP192	centrosomal protein 192(CEP192)	0	152.78	19	29	41	29	1	2537	278.9	5.48	151.18	29	0	4647.6	4112.7	3800.2	4932.8	4235.1	3737.2	4647.6	4011.83	3784.85	4617.01	4093.12	3856.51		4632.31	0.874829	0.244136	0.82479	0.189096	TRUE
O75843	O75843	AP-1 complex subunit gamma-like 2 [OS=Homo sapiens]	ap1g2	adaptor related protein complex 1 gamma 2 subunit(AP1G2)	0	51.094	14	10	23	8	1	785	87.1	6.55	72.11	10	1	1589.9	1424.6	1740.1	1711.8	1451.6	1695.2	1589.9	1389.66	1733.07	1602.21	1402.94	1749.32		1596.06	0.874842	0.217135	1.09094	0.645129	FALSE
Q92567	Q92567	Protein FAM168A [OS=Homo sapiens]	FAM168A	family with sequence similarity 168 member A(FAM168A)	0.004	5.807	14	2	2	2	1	244	26.2	8.98	2.89	2	0	353.5	362.9	380.4	476.6	357.6	346.6	353.5	354	378.863	446.089	345.612	357.666		399.795	0.874964	0.325971	0.921134	0.56112	TRUE
Q6PK04	Q6PK04	Coiled-coil domain-containing protein 137 [OS=Homo sapiens]	CCDC137	coiled-coil domain containing 137(CCDC137)	0	58.328	43	11	28	11	1	289	33.2	10.93	98.68	11	0	3380.3	3003.1	3312.9	3757	3212.7	3314.5	3380.3	2929.45	3299.52	3516.48	3105	3420.32		3448.39	0.874965	0.153702	0.974343	0.821637	TRUE
Q13546	Q13546	Receptor-interacting serine/threonine-protein kinase 1 [OS=Homo sapiens]	RIPK1	receptor interacting serine/threonine kinase 1(RIPK1)	0	156.486	40	22	86	2	1	671	75.9	6.33	253.69	22	20	7964.8	7016.2	7084.5	8355.2	7209.3	7000.9	7964.8	6844.13	7055.88	7820.32	6967.61	7224.41		7892.56	0.874985	0.234376	0.904668	0.556065	TRUE
Q86Y13	Q86Y13	E3 ubiquitin-protein ligase DZIP3 [OS=Homo sapiens]	DZIP3	DAZ interacting zinc finger protein 3(DZIP3)	0	26.78	7	7	7	7	1	1208	138.5	6.87	21.86	7	0	561.3	528.7	649.8	643.2	519.6	683.5	561.3	515.733	647.175	602.024	502.181	705.321		581.662	0.875005	0.295693	1.16261	0.419251	FALSE
P33316-3	P33316	Deoxyuridine 5'-triphosphate nucleotidohydrolase, mitochondrial [OS=Homo sapiens]	DUT	deoxyuridine triphosphatase(DUT)	0	109.337	65	13	97	13	1	252	26.5	9.36	364.74	13	0	18363.8	16700.8	12730.5	20148.1	17253.2	12530.5	18363.8	16291.2	12679.1	18858.3	16674.8	12930.5		18611	0.885658	0.193309	0.688023	0.0115883	TRUE
Q6ICG6-2	Q6ICG6	Isoform 2 of Uncharacterized protein KIAA0930 [OS=Homo sapiens]	KIAA0930	KIAA0930(KIAA0930)	0.001	11.009	5	2	4	2	1	409	46.2	7.21	12.24	2	0	301.5	285	206.6	317.8	289	200.5	301.5	278.01	205.765	297.455	279.311	206.901		299.478	0.93049	0.502894	0.688977	0.0376985	TRUE
Q9H3H1	Q9H3H1	tRNA dimethylallyltransferase, mitochondrial [OS=Homo sapiens]	TRIT1	tRNA isopentenyltransferase 1(TRIT1)	0	88.299	35	14	44	14	1	467	52.7	8.21	115.36	14	0	2885.6	2483.9	2070	3347.3	2297.8	2024.8	2885.6	2422.98	2061.64	3133.01	2220.77	2089.44		3009.31	0.771565	0.0253723	0.689707	0.0184336	TRUE
Q9Y320	Q9Y320	Thioredoxin-related transmembrane protein 2 [OS=Homo sapiens]	TMX2	thioredoxin related transmembrane protein 2(TMX2)	0	51.329	32	10	21	10	1	296	34	8.69	65.14	10	0	1905.5	1835.8	2191.2	2446.3	1946.2	2264.8	1905.5	1790.78	2182.35	2289.69	1880.95	2337.11		2097.6	0.875223	0.25491	1.07729	0.687233	FALSE
Q9UBD5-2	Q9UBD5	Isoform 2 of Origin recognition complex subunit 3 [OS=Homo sapiens]	ORC3	origin recognition complex subunit 3(ORC3)	0	148.167	42	24	64	1	1	712	82.3	7.61	236.59	24	0	289	248.6	234.5	320.4	282.4	235.3	289	242.503	233.553	299.889	272.933	242.812		294.444	0.875268	0.225723	0.808922	0.172319	TRUE
Q86YA3-1	Q86YA3	Protein ZGRF1 [OS=Homo sapiens]	ZGRF1	zinc finger GRF-type containing 1(ZGRF1)	0	21.82	2	4	6	4	1	2104	236.5	6.16	20.44	4	0	518.3	452.9	433.3	522.8	455.5	403.7	518.3	441.792	431.55	489.331	440.229	416.588		503.816	0.875342	0.296943	0.841715	0.271645	TRUE
P07311	P07311	Acylphosphatase-1 [OS=Homo sapiens]	ACYP1	acylphosphatase 1(ACYP1)	0	38.805	52	5	40	5	1	99	11.3	9.31	128.36	5	0	3846.5	2990.6	2593.3	3997	2980.3	2572.1	3846.5	2917.25	2582.82	3741.12	2880.39	2654.22		3793.81	0.764092	0.00914326	0.690209	0.0388634	TRUE
P07205	P07205	Phosphoglycerate kinase 2 [OS=Homo sapiens]	PGK2	phosphoglycerate kinase 2(PGK2)	0	79.026	18	9	162	3	1	417	44.8	8.54	382.17	9	0	838.2	710.5	951.3	861	772	836.1	838.2	693.075	947.457	805.88	746.119	862.793		822.04	0.875379	0.29119	1.10107	0.687084	FALSE
Q96I24-1	Q96I24	Far upstream element-binding protein 3 [OS=Homo sapiens]	FUBP3	far upstream element binding protein 3(FUBP3)	0	265.622	67	31	205	28	1	572	61.6	8.38	657.23	31	0	19705.3	20662.3	13331.7	20658.8	20970	13249.6	19705.3	20155.6	13277.8	19336.3	20267	13672.6		19520.8	1.03537	0.66313	0.690301	0.0123084	FALSE
Q9NSD4	Q9NSD4	zinc finger protein 275 [OS=Homo sapiens]	ZNF275	zinc finger protein 275(ZNF275)	0	16.262	12	5	5	5	1	429	48.4	9.09	12.71	5	0	84	72.6	87.1	94.8	83.2	76.1	84	70.8195	86.7481	88.7311	80.4107	78.5296		86.3655	0.875524	0.309954	0.95685	0.637247	TRUE
Q9NRR4-1	Q9NRR4	Ribonuclease 3 [OS=Homo sapiens]	DROSHA	drosha ribonuclease III(DROSHA)	0	139.758	23	23	62	23	1	1374	159.2	7.87	181.14	23	0	5844.5	5164.6	4886.9	6185.6	5327.2	4766.6	5844.5	5037.94	4867.16	5789.61	5148.61	4918.78		5817.06	0.875576	0.21528	0.841142	0.245797	TRUE
P62861	P62861	40S ribosomal protein S30 [OS=Homo sapiens]	FAU	FAU, ubiquitin like and ribosomal protein S30 fusion(FAU)	0	16.496	32	3	11	3	1	59	6.6	12.15	34.3	3	0	2698	2480.3	2592.5	3110.1	2578.1	2452	2698	2419.47	2582.03	2911	2491.67	2530.28		2804.5	0.875582	0.212251	0.911448	0.470772	TRUE
Q9H0K6	Q9H0K6	Pseudouridylate synthase 7 homolog-like protein [OS=Homo sapiens]	PUS7L	pseudouridylate synthase 7 like(PUS7L)	0	126.402	36	22	63	22	1	701	80.6	7.56	185.02	22	0	5020.3	4388.5	4405.5	5092.8	4437.9	4177.9	5020.3	4280.87	4387.7	4766.77	4289.12	4311.28		4893.53	0.875644	0.247154	0.888824	0.434501	TRUE
Q8WWZ3-1	Q8WWZ3	Ectodysplasin-A receptor-associated adapter protein [OS=Homo sapiens]	EDARADD	EDAR associated death domain(EDARADD)	0	38.032	34	7	11	7	1	215	24.8	5.4	35.99	7	0	675.6	580	574.7	704.9	624.5	513.9	675.6	565.775	572.378	659.774	603.564	530.307		667.687	0.875664	0.298143	0.82575	0.231355	TRUE
P43366	P43366	Melanoma-associated antigen B1 [OS=Homo sapiens]	MAGEB1	MAGE family member B1(MAGEB1)	0	102.351	49	15	37	13	1	347	39	8.44	149.38	15	1	5789.2	5104.9	5281.3	6154.3	5312.7	5199.2	5789.2	4979.7	5259.96	5760.31	5134.59	5365.19		5774.76	0.875733	0.215909	0.919965	0.613663	TRUE
Q9BY42	Q9BY42	protein RTF2 homolog [OS=Homo sapiens]	RTFDC1	replication termination factor 2 domain containing 1(RTFDC1)	0	83.219	46	15	31	15	1	306	33.9	8.59	95.94	15	0	3610.6	3129.3	2885.7	3693.4	3245.6	2627.1	3610.6	3052.55	2874.04	3456.96	3136.79	2710.97		3533.78	0.875741	0.156098	0.790233	0.156242	TRUE
Q9Y605	Q9Y605	MORF4 family-associated protein 1 [OS=Homo sapiens]	MRFAP1	Morf4 family associated protein 1(MRFAP1)	0	25.03	38	4	6	4	1	127	14.6	4.7	22.45	4	0	1137.1	1056	965.7	1301.3	1068.3	934.2	1137.1	1030.1	961.799	1217.99	1032.49	964.025		1177.55	0.875798	0.228315	0.817727	0.212415	TRUE
Q8IY81	Q8IY81	pre-rRNA processing protein FTSJ3 [OS=Homo sapiens]	FTSJ3	FtsJ homolog 3(FTSJ3)	0	247.57	44	31	100	31	1	847	96.5	8.4	416.47	31	0	12518.9	11274.5	11021.1	13814.3	11684.3	10700	12518.9	10998	10976.6	12929.9	11292.6	11041.6		12724.4	0.875898	0.156474	0.865194	0.383576	TRUE
P68431	P68431	Histone H3.1 [OS=Homo sapiens]	HIST1H3A	histone cluster 1 H3 family member a(HIST1H3A)	0	38.373	54	7	63	1	1	136	15.4	11.12	166.91	7	6	3725.1	3284.6	3434.6	3755	3246.7	3410.4	3725.1	3204.04	3420.73	3514.61	3137.86	3519.28		3619.86	0.875988	0.156867	0.958602	0.743376	TRUE
P31947-1	P31947	14-3-3 protein sigma [OS=Homo sapiens]	SFN	stratifin(SFN)	0	55.307	50	12	41	6	1	248	27.8	4.74	101.07	12	0	729.1	662.6	1043.8	796.4	667.7	892.1	729.1	646.35	1039.58	745.416	645.316	920.581		737.258	0.875993	0.293487	1.32936	0.123278	FALSE
Q9BTL3	Q9BTL3	RNMT-activating mini protein [OS=Homo sapiens]	FAM103A1	family with sequence similarity 103 member A1(FAM103A1)	0	38.688	65	6	26	6	1	118	14.4	8.94	95.64	6	0	3297	2922.8	3242.3	3459.8	2974	3130.7	3297	2851.12	3229.2	3238.31	2874.3	3230.65		3267.66	0.876074	0.213967	0.988454	0.878221	TRUE
Q9P265	Q9P265	Disco-interacting protein 2 homolog B [OS=Homo sapiens]	DIP2B	disco interacting protein 2 homolog B(DIP2B)	0	300.104	44	48	125	46	1	1576	171.4	8.09	466.92	48	1	8972.1	8219.8	11069.5	9975.3	8300.6	10494.4	8972.1	8018.21	11024.8	9336.7	8022.32	10829.4		9154.4	0.87611	0.158324	1.19365	0.134121	FALSE
Q8TAP8	Q8TAP8	protein phosphatase 1 regulatory subunit 35 [OS=Homo sapiens]	PPP1R35	protein phosphatase 1 regulatory subunit 35(PPP1R35)	0	31.709	38	6	8	6	1	253	27.9	8.68	31.17	6	0	822.3	748	788.1	932.1	781.5	719.5	822.3	729.655	784.916	872.429	755.3	742.471		847.364	0.87622	0.294342	0.901257	0.488947	TRUE
Q9H4G0-1	Q9H4G0	Band 4.1-like protein 1 [OS=Homo sapiens]	EPB41L1	erythrocyte membrane protein band 4.1 like 1(EPB41L1)	0	34.73	11	7	18	5	1	881	98.4	5.62	59.25	7	0	711.7	586.7	586.9	712.8	658	576.4	711.7	572.311	584.529	667.168	635.941	594.802		689.434	0.876264	0.300381	0.855289	0.309488	TRUE
Q92913-3	Q92913	Isoform 3 of Fibroblast growth factor 13 [OS=Homo sapiens]	FGF13	fibroblast growth factor 13(FGF13)	0	17.504	18	5	9	5	1	255	28.7	8.68	23.94	5	0	875.3	808	804.3	986.4	815.3	715.7	875.3	788.184	801.051	923.253	787.967	738.549		899.276	0.876344	0.294808	0.856022	0.339597	TRUE
Q70EL1-1	Q70EL1	Inactive ubiquitin carboxyl-terminal hydrolase 54 [OS=Homo sapiens]	USP54	ubiquitin specific peptidase 54(USP54)	0	77.182	14	16	26	16	1	1684	187.3	7.28	82.92	16	0	1678.3	1465.2	1717.8	1768.5	1544.3	1677.2	1678.3	1429.27	1710.86	1655.28	1492.53	1730.75		1666.79	0.876472	0.259471	1.0324	0.887554	FALSE
Q9NWQ9	Q9NWQ9	Uncharacterized protein C14orf119 [OS=Homo sapiens]	c14orf119	chromosome 14 open reading frame 119(C14orf119)	0	13.718	23	3	4	3	1	140	16	4.94	9.21	3	0	155.7	129.6	111.8	139.6	128.9	107	155.7	126.422	111.348	130.663	124.579	110.416		143.182	0.87651	0.313203	0.774417	0.120856	TRUE
Q86WV6	Q86WV6	Stimulator of interferon genes protein [OS=Homo sapiens]	TMEM173	transmembrane protein 173(TMEM173)	0	47.913	23	5	9	5	1	379	42.2	7.05	42.78	5	0	1060	1002.6	1154.4	1274.9	1031.6	1241.4	1060	978.011	1149.74	1193.28	997.016	1281.03		1126.64	0.876511	0.230716	1.07877	0.747053	FALSE
Q9UJJ7	Q9UJJ7	RNA pseudouridylate synthase domain-containing protein 1 [OS=Homo sapiens]	RPUSD1	RNA pseudouridylate synthase domain containing 1(RPUSD1)	0.005	5.466	5	2	4	2	1	312	34.7	7.05	11.84	2	0	150.4	143.9	140.2	168.6	134.3	123.8	150.4	140.371	139.634	157.807	129.798	127.752		154.103	0.876582	0.313441	0.867555	0.317311	TRUE
Q9Y3D8	Q9Y3D8	Adenylate kinase isoenzyme 6 [OS=Homo sapiens]	AK6	adenylate kinase 6(AK6)	0	76.475	68	9	20	9	1	172	20	4.58	90.39	9	0	2541.3	2203.9	2071.8	2641.4	2323	1962.7	2541.3	2149.85	2063.43	2472.3	2245.12	2025.36		2506.8	0.876609	0.225943	0.81554	0.234617	TRUE
O94972	O94972	E3 ubiquitin-protein ligase TRIM37 [OS=Homo sapiens]	TRIM37	tripartite motif containing 37(TRIM37)	0	30.304	8	5	8	5	1	964	107.8	5.15	30.68	5	0	980.3	883.4	888.4	953.1	806.8	900.4	980.3	861.734	884.811	892.084	779.752	929.146		936.192	0.876682	0.296084	0.968795	0.764668	TRUE
Q9BUT9-1	Q9BUT9	MAPK regulated corepressor interacting protein 2 [OS=Homo sapiens]	MCRIP2	MAPK regulated corepressor interacting protein 2(MCRIP2)	0	23.862	45	5	9	5	1	160	17.8	9.41	30.34	5	0	1676.9	1773.6	1568.2	2032.8	1457.3	1678.9	1676.9	1730.1	1561.86	1902.66	1408.44	1732.5		1789.78	0.876796	0.260662	0.920326	0.559059	TRUE
Q96AD5-1	Q96AD5	Patatin-like phospholipase domain-containing protein 2 [OS=Homo sapiens]	PNPLA2	patatin like phospholipase domain containing 2(PNPLA2)	0	40.992	22	9	16	9	1	504	55.3	7.08	58.09	9	0	2270.7	2161.1	1654.9	2473.3	1979	1713.8	2270.7	2108.1	1648.21	2314.96	1912.65	1768.51		2292.83	0.876809	0.22668	0.745089	0.097711	TRUE
O94916-5	O94916	Isoform E of Nuclear factor of activated T-cells 5 [OS=Homo sapiens]	NFAT5	nuclear factor of activated T-cells 5(NFAT5)	0	83.902	15	16	35	1	1	1549	167.7	5.3	90.23	16	0	197.4	164	222.1	192.7	177.2	200.4	197.4	159.978	221.203	180.364	171.259	206.798		188.882	0.876837	0.23167	1.13299	0.628236	FALSE
Q9H4A5	Q9H4A5	Golgi phosphoprotein 3-like [OS=Homo sapiens]	GOLPH3L	golgi phosphoprotein 3 like(GOLPH3L)	0	65.642	44	11	37	9	1	285	32.7	5.83	112.91	11	0	2513.4	2217.4	2409.1	2626.8	2273.1	2285.8	2513.4	2163.02	2399.37	2458.64	2196.89	2358.78		2486.02	0.876886	0.226965	0.956981	0.802626	TRUE
Q9ULZ3	Q9ULZ3	apoptosis-associated speck-like protein containing a CARD [OS=Homo sapiens]	pycard	PYD and CARD domain containing(PYCARD)	0	33.275	35	6	14	5	1	195	21.6	6.34	43.97	6	1	1671.5	1496.7	1365.2	1755.2	1497.1	1328.5	1671.5	1459.99	1359.68	1642.84	1446.91	1370.91		1657.17	0.87707	0.261674	0.823875	0.220125	TRUE
Q8NCG7	Q8NCG7	Sn1-specific diacylglycerol lipase beta [OS=Homo sapiens]	DAGLB	diacylglycerol lipase beta(DAGLB)	0	34.728	16	9	20	9	1	672	73.7	6.55	47.74	9	0	1422.5	1363.2	1296.6	1613.2	1285.4	1401	1422.5	1329.77	1291.36	1509.93	1242.31	1445.73		1466.21	0.877115	0.225343	0.933388	0.60746	TRUE
Q16539	Q16539	Mitogen-activated protein kinase 14 [OS=Homo sapiens]	MAPK14	mitogen-activated protein kinase 14(MAPK14)	0	117.356	57	15	47	3	1	360	41.3	5.78	166.02	15	13	6522.6	5879.4	5922.9	7027.6	5955	5934.5	6522.6	5735.21	5898.97	6577.71	5755.36	6123.96		6550.15	0.877122	0.221511	0.91776	0.600835	TRUE
O14810	O14810	Complexin-1 [OS=Homo sapiens]	CPLX1	complexin 1(CPLX1)	0.001	9.273	18	1	2	1	1	134	15	4.97	6.94	1	0	94.5	87.9	66.6	108.8	79.3	67.1	94.5	85.7442	66.331	101.835	76.6415	69.2422		98.1674	0.827086	0.177343	0.69052	0.0405903	TRUE
Q9P278-2	Q9P278	Isoform 2 of Folliculin-interacting protein 2 [OS=Homo sapiens]	FNIP2	folliculin interacting protein 2(FNIP2)	0.001	8.395	2	3	3	3	1	1137	124.8	6.46	3.62	3	0	235.4	220.4	233.4	260.3	212.3	204.8	235.4	214.995	232.457	243.636	205.183	211.338		239.518	0.877131	0.232795	0.926434	0.505459	TRUE
P61758	P61758	Prefoldin subunit 3 [OS=Homo sapiens]	VBP1	VHL binding protein 1(VBP1)	0	127.564	61	13	81	13	1	197	22.6	7.11	269.02	13	0	12099.7	10744.8	11202.5	12843.4	11047.4	10742.8	12099.7	10481.3	11157.2	12021.2	10677	11085.8		12060.4	0.877178	0.161954	0.922147	0.660848	TRUE
Q9NP31-2	Q9NP31	Isoform 1 of SH2 domain-containing protein 2A [OS=Homo sapiens]	SH2D2A	SH2 domain containing 2A(SH2D2A)	0	27.639	18	6	12	6	1	399	44.1	7.9	26.09	6	0	831.1	751.6	1148.1	907.5	766.8	1175.4	831.1	733.167	1143.46	849.404	741.093	1212.93		840.252	0.877273	0.298318	1.40219	0.0568683	FALSE
O00287	O00287	Regulatory factor X-associated protein [OS=Homo sapiens]	rfxap	regulatory factor X associated protein(RFXAP)	0	25.472	18	4	5	4	1	272	28.2	5.54	25.9	4	0	428.7	393.4	389.2	470.5	391.9	389.8	428.7	383.752	387.628	440.38	378.762	402.245		434.54	0.87738	0.335344	0.908861	0.511201	TRUE
Q8TCX1	Q8TCX1	Cytoplasmic dynein 2 light intermediate chain 1 [OS=Homo sapiens]	DYNC2LI1	dynein cytoplasmic 2 light intermediate chain 1(DYNC2LI1)	0	25.217	21	7	10	1	1	351	39.6	7.53	34.73	7	5	709.9	639.5	882.6	759.5	644.4	829.4	709.9	623.816	879.035	710.878	622.797	855.879		710.389	0.877415	0.29886	1.2211	0.316667	FALSE
Q6FIF0	Q6FIF0	AN1-type zinc finger protein 6 [OS=Homo sapiens]	ZFAND6	zinc finger AN1-type containing 6(ZFAND6)	0	34.619	36	6	15	5	1	208	22.5	7.2	47.66	6	2	1903.3	1668.5	2012.1	2051.9	1787.6	1846.5	1903.3	1627.58	2003.97	1920.54	1727.67	1905.45		1911.92	0.877455	0.263103	1.02238	0.933793	FALSE
Q86UD1	Q86UD1	Out at first protein homolog [OS=Homo sapiens]	OAF	out at first homolog(OAF)	0.003	6.379	3	1	2	1	1	273	30.7	6.84	3.29	1	0	64.4	58.3	64.6	72.1	60.9	60.2	64.4	56.8702	64.339	67.4843	58.8583	62.1219		65.9421	0.8775	0.274275	0.958878	0.598655	TRUE
Q9Y3B8-1	Q9Y3B8	Oligoribonuclease, mitochondrial [OS=Homo sapiens]	REXO2	RNA exonuclease 2(REXO2)	0	86.089	51	10	45	10	1	237	26.8	6.87	155.08	10	0	10337.5	8988	8324.6	10675.1	9388.7	8194.7	10337.5	8767.57	8290.97	9991.7	9073.95	8456.32		10164.6	0.87763	0.163508	0.823805	0.202514	TRUE
Q15118	Q15118	[Pyruvate dehydrogenase (Acetyl-transferring)] kinase isozyme 1, mitochondrial [OS=Homo sapiens]	PDK1	pyruvate dehydrogenase kinase 1(PDK1)	0	43.799	21	7	14	7	1	436	49.2	8.81	48.61	7	0	2329.3	2083.6	1620.7	2399.8	2052.3	1546.9	2329.3	2032.5	1614.15	2246.17	1983.5	1596.29		2287.73	0.877723	0.230069	0.701663	0.051868	TRUE
Q8N3J9	Q8N3J9	Zinc finger protein 664 [OS=Homo sapiens]	ZNF664	zinc finger protein 664(ZNF664)	0	13.475	17	4	8	3	1	261	30.3	8.69	11.55	4	0	137.9	121.1	111.4	140.8	122.7	101.9	137.9	118.13	110.95	131.786	118.587	105.153		134.843	0.877748	0.317311	0.801313	0.163917	TRUE
P46781	P46781	40S ribosomal protein S9 [OS=Homo sapiens]	RPS9	ribosomal protein S9(RPS9)	0	84.832	57	16	114	16	1	194	22.6	10.65	298.67	16	0	18679.7	16996.3	17036.6	20172.6	16962	16761.7	18679.7	16579.5	16967.8	18881.2	16393.4	17296.8		18780.4	0.87785	0.16338	0.912242	0.665491	TRUE
Q7Z5L9-1	Q7Z5L9	Interferon regulatory factor 2-binding protein 2 [OS=Homo sapiens]	IRF2BP2	interferon regulatory factor 2 binding protein 2(IRF2BP2)	0	155.16	52	17	51	1	1	587	61	8.69	225.21	17	14	3086.6	2694.4	2952.8	3166.2	2776.3	2847.4	3086.6	2628.32	2940.87	2963.51	2683.23	2938.31		3025.05	0.877926	0.220524	0.971748	0.782203	TRUE
Q13206	Q13206	probable ATP-dependent RNA helicase DDX10 [OS=Homo sapiens]	DDX10	DEAD-box helicase 10(DDX10)	0	197.511	42	34	78	34	1	875	100.8	8.63	272.3	34	0	8071.2	7345.7	6583.9	8719.8	7332.7	6132.7	8071.2	7165.54	6557.3	8161.58	7086.87	6328.49		8116.39	0.878002	0.246871	0.793813	0.151521	TRUE
Q53FT3	Q53FT3	Protein Hikeshi [OS=Homo sapiens]	HIKESHI	Hikeshi, heat shock protein nuclear import factor(HIKESHI)	0	29.397	24	4	10	4	1	197	21.6	5.45	38.18	4	0	2160.2	1917	1961.1	2294.5	1979.5	1790.8	2160.2	1869.98	1953.18	2147.61	1913.14	1847.97		2153.91	0.878201	0.231853	0.882386	0.456296	TRUE
Q8N1S5-2	Q8N1S5	Isoform 2 of Zinc transporter ZIP11 [OS=Homo sapiens]	SLC39A11	solute carrier family 39 member 11(SLC39A11)	0	13.979	9	3	3	3	1	335	34.7	5.38	12.41	3	0	226.5	200.4	294.9	242.1	209.6	304.9	226.5	195.485	293.709	226.601	202.573	314.634		226.551	0.87852	0.238172	1.34262	0.119353	FALSE
P62805	P62805	histone H4 [OS=Homo sapiens]	HIST1H4I	histone cluster 1 H4 family member i(HIST1H4I)	0	78.453	52	8	72	8	1	103	11.4	11.36	252.02	8	0	15135.5	13369	15282	14428	12540	16208.4	15135.5	13041.1	15220.3	13504.3	12119.6	16725.9		14319.9	0.878521	0.165809	1.11544	0.257798	FALSE
Q9H497-1	Q9H497	Torsin-3A [OS=Homo sapiens]	TOR3A	torsin family 3 member A(TOR3A)	0	55.664	38	10	17	10	1	397	46.2	6.01	63.02	10	0	2410.4	2123.5	1930.5	2641.3	2295.1	1943.4	2410.4	2071.42	1922.7	2472.21	2218.16	2005.44		2441.3	0.878542	0.233135	0.804518	0.207061	TRUE
Q9H7B4-1	Q9H7B4	Histone-lysine N-methyltransferase SMYD3 [OS=Homo sapiens]	SMYD3	SET and MYND domain containing 3(SMYD3)	0	21.352	11	6	11	5	1	428	49.1	7.25	29.18	6	0	342.7	372.8	284	474.3	338.8	252.3	342.7	363.657	282.853	443.936	327.442	260.355		393.318	0.878549	0.339939	0.690545	0.0449497	TRUE
Q96F44-1	Q96F44	E3 ubiquitin-protein ligase TRIM11 [OS=Homo sapiens]	TRIM11	tripartite motif containing 11(TRIM11)	0	73.465	41	17	32	5	1	468	52.7	5.69	100.81	17	10	3744.1	3696.7	3651.2	4125.1	3182.6	3778.8	3744.1	3606.04	3636.45	3861.02	3075.9	3899.44		3802.56	0.878611	0.165208	0.990897	0.905886	TRUE
O95793	O95793	double-stranded RNA-binding protein Staufen homolog 1 [OS=Homo sapiens]	STAU1	staufen double-stranded RNA binding protein 1(STAU1)	0	243.358	58	32	115	1	1	577	63.1	9.44	356.86	32	32	16725.2	14931.7	15900.2	17826.5	15308.1	14965.4	16725.2	14565.5	15836	16685.3	14794.9	15443.2		16705.2	0.878778	0.166743	0.936208	0.834661	TRUE
Q7Z4G4	Q7Z4G4	tRNA (guanine(10)-N2)-methyltransferase homolog [OS=Homo sapiens]	TRMT11	tRNA methyltransferase 11 homolog(TRMT11)	0	18.88	5	3	6	3	1	463	53.4	7.78	17.15	3	0	711.2	606.3	567.3	716	644.1	547.5	711.2	591.43	565.008	670.163	622.507	564.979		690.682	0.878796	0.309966	0.818024	0.213459	TRUE
Q9NW81-4	Q9NW81	Isoform 4 of ATP synthase subunit s-like protein [OS=Homo sapiens]	ATP5SL	ATP5S like(ATP5SL)	0	20.546	22	5	9	2	1	263	30.2	6.24	27.27	5	3	908.6	734.8	1083.1	863	819.1	1042.3	908.6	716.779	1078.72	807.752	791.64	1075.58		858.176	0.878851	0.304349	1.25516	0.241528	FALSE
Q86YT6	Q86YT6	E3 ubiquitin-protein ligase mib1 [OS=Homo sapiens]	MIB1	mindbomb E3 ubiquitin protein ligase 1(MIB1)	0	110.873	27	20	35	20	1	1006	110.1	6.92	131.33	20	0	3376.3	2992.4	3121.7	3497.1	3028	3017.6	3376.3	2919.01	3109.09	3273.22	2926.49	3113.94		3324.76	0.879085	0.224702	0.935861	0.588403	TRUE
O14657	O14657	Torsin-1B [OS=Homo sapiens]	TOR1B	torsin family 1 member B(TOR1B)	0	34.422	24	7	11	7	1	336	38	8.54	41.42	7	0	1411.9	1209.8	1385.8	1383.6	1241.1	1312.6	1411.9	1180.13	1380.2	1295.02	1199.49	1354.51		1353.46	0.879087	0.232643	1.01026	0.984083	FALSE
Q5VYV7	Q5VYV7	protein SLX4IP [OS=Homo sapiens]	slx4ip	SLX4 interacting protein(SLX4IP)	0.007	4.673	5	1	1	1	1	408	45.5	9.42	4.22	1	0	50.4	49.2	55.4	59.8	47.1	51	50.4	47.9934	55.1762	55.9717	45.521	52.6282		53.1859	0.879128	0.280296	1.01347	0.839073	FALSE
O15091	O15091	Mitochondrial ribonuclease P protein 3 [OS=Homo sapiens]	KIAA0391	KIAA0391(KIAA0391)	0	65.318	32	13	21	13	1	583	67.3	8.78	83.83	13	0	2757.4	2512.9	2623.2	3001.6	2527.9	2691.3	2757.4	2451.27	2612.6	2809.44	2443.15	2777.22		2783.42	0.87921	0.225154	0.968201	0.762188	TRUE
Q9NPA8-1	Q9NPA8	Transcription and mRNA export factor ENY2 [OS=Homo sapiens]	ENY2	ENY2, transcription and export complex 2 subunit(ENY2)	0	37.769	44	6	31	6	1	101	11.5	9.33	100.44	6	0	5419.3	4800.9	4286.7	5625.1	4874.2	4171.1	5419.3	4683.16	4269.38	5264.99	4710.79	4304.27		5342.15	0.87923	0.26074	0.802454	0.13394	TRUE
O75061-2	O75061	Isoform 2 of Putative tyrosine-protein phosphatase auxilin [OS=Homo sapiens]	DNAJC6	DnaJ heat shock protein family (Hsp40) member C6(DNAJC6)	0	110.869	23	19	38	19	1	970	105.6	7.47	125.47	19	0	4179.7	3683.2	3654.6	4347.7	3787.1	3473	4179.7	3592.87	3639.84	4069.37	3660.14	3583.88		4124.53	0.879252	0.167295	0.875701	0.387425	TRUE
Q96MY1	Q96MY1	Nucleolar protein 4-like [OS=Homo sapiens]	NOL4L	nucleolar protein 4 like(NOL4L)	0	21.368	21	5	9	5	1	436	47.2	5.08	19.15	5	0	937	871.3	1202	1030.7	850.8	1083.5	937	849.931	1197.14	964.717	822.277	1118.09		950.858	0.879315	0.306135	1.21745	0.325557	FALSE
Q08AD1	Q08AD1	Calmodulin-regulated spectrin-associated protein 2 [OS=Homo sapiens]	CAMSAP2	calmodulin regulated spectrin associated protein family member 2(CAMSAP2)	0.002	7.234	2	2	5	1	1	1489	168	6.8	16.13	2	0	13.3	12.3	13.4	13.4	11.1	15.5	13.3	11.9983	13.3459	12.5422	10.7279	15.9949		12.9211	0.879424	0.281402	1.13538	0.702508	FALSE
Q8IZ52	Q8IZ52	Chondroitin sulfate synthase 2 [OS=Homo sapiens]	CHPF	chondroitin polymerizing factor(CHPF)	0	19.24	7	4	7	4	1	775	85.4	6.93	20.5	4	0	158.5	137.3	179	173.6	153.5	167.7	158.5	133.933	178.277	162.486	148.354	173.054		160.493	0.879435	0.322967	1.09453	0.808237	FALSE
Q8IVD9	Q8IVD9	NudC domain-containing protein 3 [OS=Homo sapiens]	NUDCD3	NudC domain containing 3(NUDCD3)	0	115.868	66	21	62	21	1	361	40.8	5.25	215.68	21	0	6101.5	5559.1	5545.8	6881.1	5802.4	5240.9	6101.5	5422.76	5523.4	6440.59	5607.88	5408.22		6271.04	0.87949	0.231302	0.871595	0.364266	TRUE
Q6PCT2-1	Q6PCT2	F-box/LRR-repeat protein 19 [OS=Homo sapiens]	FBXL19	F-box and leucine rich repeat protein 19(FBXL19)	0	25.291	15	8	10	8	1	694	75.7	9.17	34.62	8	0	475.5	436.1	444.1	532.5	446.1	430.4	475.5	425.405	442.306	498.41	431.145	444.141		486.955	0.879495	0.312644	0.910193	0.496089	TRUE
Q6P3S6	Q6P3S6	F-box only protein 42 [OS=Homo sapiens]	FBXO42	F-box protein 42(FBXO42)	0	38.884	17	7	22	7	1	717	77.8	7.43	41.18	7	0	849.8	822.2	1000.4	945.7	749	981.3	849.8	802.035	996.359	885.158	723.89	1012.63		867.479	0.879517	0.306915	1.15795	0.492452	FALSE
Q86WR7-1	Q86WR7	Proline and serine-rich protein 2 [OS=Homo sapiens]	PROSER2	proline and serine rich 2(PROSER2)	0	28.787	21	7	9	7	1	435	45.8	7.2	29.69	7	0	1060.3	951.4	998.2	1111.4	951.3	951.4	1060.3	928.067	994.168	1040.25	919.408	981.774		1050.28	0.879519	0.241057	0.940678	0.616335	TRUE
Q92698	Q92698	DNA repair and recombination protein RAD54-like [OS=Homo sapiens]	RAD54L	RAD54-like (S. cerevisiae)(RAD54L)	0	55.173	19	12	22	12	1	747	84.3	8.56	66.56	12	0	2799.9	2452.5	1887.1	2959.8	2483.7	1910.6	2799.9	2392.35	1879.48	2770.32	2400.43	1971.6		2785.11	0.86043	0.164116	0.691368	0.0190506	TRUE
P35968	P35968	Vascular endothelial growth factor receptor 2 [OS=Homo sapiens]	KDR	kinase insert domain receptor(KDR)	0.007	4.701	1	2	9	1	1	1356	151.4	5.85	19	2	0	159.8	137.6	157.3	163.1	145.5	158.2	159.8	134.225	156.665	152.659	140.622	163.251		156.229	0.879628	0.32362	1.02386	0.940246	FALSE
Q6P0N0	Q6P0N0	Mis18-binding protein 1 [OS=Homo sapiens]	MIS18BP1	MIS18 binding protein 1(MIS18BP1)	0	38.394	10	9	12	9	1	1132	129	9.25	34.02	9	0	885.3	858	702.2	1011.8	801.7	666	885.3	836.957	699.363	947.027	774.823	687.263		916.163	0.879636	0.307376	0.756757	0.125514	TRUE
Q96AT9	Q96AT9	ribulose-phosphate 3-epimerase [OS=Homo sapiens]	RPE	ribulose-5-phosphate-3-epimerase(RPE)	0	46.781	50	7	14	7	1	228	24.9	5.58	50.92	7	0	2284	2143.2	2083.9	2453.3	2005.9	1952.4	2284	2090.64	2075.48	2296.24	1938.65	2014.73		2290.12	0.879711	0.23756	0.893012	0.500029	TRUE
Q86XN7	Q86XN7	Proline and serine-rich protein 1 [OS=Homo sapiens]	PROSER1	proline and serine rich 1(PROSER1)	0	20.348	7	5	9	5	1	944	95.6	8.88	26.78	5	0	1031.7	966.5	1064.1	1152.4	945.4	1031.6	1031.7	942.796	1059.8	1078.63	913.706	1064.53		1055.16	0.879723	0.241769	1.00664	0.919637	FALSE
Q08426	Q08426	Peroxisomal bifunctional enzyme [OS=Homo sapiens]	ehhadh	enoyl-CoA hydratase and 3-hydroxyacyl CoA dehydrogenase(EHHADH)	0	116.823	34	22	46	22	1	723	79.4	9.14	154.73	22	0	5125.1	4289.2	5026.9	5313	4864	4983.6	5125.1	4184.01	5006.59	4972.87	4700.94	5142.71		5048.99	0.879874	0.263234	1.00508	0.902257	FALSE
Q9H040-1	Q9H040	SprT-like domain-containing protein Spartan [OS=Homo sapiens]	SPRTN	SprT-like N-terminal domain(SPRTN)	0	38.659	23	7	11	7	1	489	55.1	8.15	37.65	7	0	363.5	337.1	302.1	429.9	357.1	279	363.5	328.833	300.88	402.379	345.128	287.907		382.939	0.879984	0.345633	0.768773	0.127998	TRUE
Q9BQ70	Q9BQ70	Transcription factor 25 [OS=Homo sapiens]	TCF25	transcription factor 25(TCF25)	0	45.966	17	9	18	9	1	676	76.6	6.35	55.29	9	0	1651.6	1555.2	1475.1	1817.1	1482.7	1402.4	1651.6	1517.06	1469.14	1700.77	1432.99	1447.17		1676.19	0.879989	0.27262	0.869925	0.357732	TRUE
O75820-1	O75820	Zinc finger protein 189 [OS=Homo sapiens]	ZNF189	zinc finger protein 189(ZNF189)	0.003	6.409	5	3	3	2	1	626	72.9	8.5	2.3	3	0	151.2	129.2	148.6	164.3	147.3	146.7	151.2	126.031	148	153.782	142.362	151.384		152.491	0.88003	0.324978	0.981643	0.745312	TRUE
Q9GZR2-1	Q9GZR2	RNA exonuclease 4 [OS=Homo sapiens]	REXO4	REX4 homolog, 3'-5' exonuclease(REXO4)	0	157.411	60	23	59	23	1	422	46.6	9.77	192.28	23	0	8495.5	7640.1	7182.9	9076.8	7760.6	6889.6	8495.5	7452.72	7153.88	8495.72	7500.43	7109.56		8495.61	0.880052	0.255617	0.839459	0.277461	TRUE
Q9H1J1-1	Q9H1J1	Regulator of nonsense transcripts 3A [OS=Homo sapiens]	UPF3A	UPF3 regulator of nonsense transcripts homolog A (yeast)(UPF3A)	0	19.904	17	5	6	5	1	476	54.7	9.03	16.7	5	0	187.4	168	140.8	183.4	157.4	135.9	187.4	163.88	140.231	171.659	152.123	140.239		179.53	0.880086	0.24434	0.781125	0.125991	TRUE
Q13487	Q13487	snRNA-activating protein complex subunit 2 [OS=Homo sapiens]	SNAPC2	small nuclear RNA activating complex polypeptide 2(SNAPC2)	0	14.018	22	4	5	4	1	334	35.5	6.01	9.7	4	0	298	256.7	249.3	294.5	263.3	231.5	298	250.404	248.293	275.647	254.473	238.891		286.823	0.880119	0.24447	0.849275	0.260672	TRUE
P48382	P48382	DNA-binding protein RFX5 [OS=Homo sapiens]	RFX5	regulatory factor X5(RFX5)	0	57.981	31	14	18	14	1	616	65.3	9.29	63.85	14	0	1839.8	1644.1	1876.8	1916.3	1649.7	1795.7	1839.8	1603.78	1869.22	1793.62	1594.39	1853.03		1816.71	0.880209	0.273458	1.02445	0.924239	FALSE
Q86WJ1-1	Q86WJ1	Chromodomain-helicase-DNA-binding protein 1-like [OS=Homo sapiens]	CHD1L	chromodomain helicase DNA binding protein 1 like(CHD1L)	0	101.987	30	22	37	22	1	897	100.9	6.9	121.35	22	0	6820.9	5738.4	4683.8	7249.5	5775.9	4598.9	6820.9	5597.66	4664.88	6785.4	5582.26	4745.72		6803.15	0.821673	0.0687797	0.691636	0.0161982	TRUE
Q92896-2	Q92896	Isoform 2 of Golgi apparatus protein 1 [OS=Homo sapiens]	GLG1	golgi glycoprotein 1(GLG1)	0	235.237	39	40	82	40	1	1203	137.1	6.9	237.86	40	0	10049	9229.9	10397	11216.1	9397.6	10338.2	10049	9003.53	10355	10498.1	9082.55	10668.3		10273.5	0.880227	0.172665	1.02318	0.736447	FALSE
Q9GZY4	Q9GZY4	Cytochrome c oxidase assembly factor 1 homolog [OS=Homo sapiens]	coa1	cytochrome c oxidase assembly factor 1 homolog(COA1)	0	37.569	41	4	7	4	1	146	16.7	8.81	38.98	4	0	1509.3	1348.6	1449.5	1559.6	1343.3	1417.5	1509.3	1315.53	1443.64	1459.76	1298.27	1462.75		1484.53	0.880344	0.237384	0.978896	0.845836	TRUE
O77932	O77932	Decapping and exoribonuclease protein [OS=Homo sapiens]	DXO	decapping exoribonuclease(DXO)	0	23.567	11	4	14	4	1	396	44.9	7.69	40.05	4	0	1856.3	1266.2	1275.3	2005.6	1239.2	1273.6	1856.3	1235.15	1270.15	1877.21	1197.66	1314.26		1866.75	0.651613	0.00204525	0.69222	0.0355126	TRUE
Q9BTV6	Q9BTV6	Diphthine methyltransferase [OS=Homo sapiens]	DPH7	diphthamide biosynthesis 7(DPH7)	0.001	9.688	5	2	3	2	1	452	50.5	6.6	13.11	2	0	393.9	316.2	380.6	386.5	369.4	323.9	393.9	308.445	379.062	361.757	357.016	334.241		377.829	0.880639	0.348254	0.943951	0.659735	TRUE
Q96K37-1	Q96K37	Solute carrier family 35 member E1 [OS=Homo sapiens]	SLC35E1	solute carrier family 35 member E1(SLC35E1)	0	21.526	12	3	12	3	1	410	44.7	9.79	61.97	3	0	552.2	502.7	630.9	594.3	502.7	605.6	552.2	490.371	628.351	556.254	485.847	624.934		554.227	0.880702	0.317311	1.13066	0.532116	FALSE
P56645-2	P56645	Isoform 2 of Period circadian protein homolog 3 [OS=Homo sapiens]	PER3	period circadian clock 3(PER3)	0	67.084	9	8	34	7	1	1210	132.6	6.84	112.47	8	1	2044.8	1881.7	2019.6	2221.1	1858.6	1995.4	2044.8	1835.55	2011.44	2078.91	1796.29	2059.1		2061.85	0.880722	0.275417	0.987108	0.888857	TRUE
Q96NB3	Q96NB3	zinc finger protein 830 [OS=Homo sapiens]	ZNF830	zinc finger protein 830(ZNF830)	0	53.316	37	11	37	10	1	372	42	5.31	91.08	11	0	1512.2	1362.3	1337.4	1628.8	1392.3	1326.6	1512.2	1328.89	1332	1524.53	1345.62	1368.95		1518.36	0.880722	0.238823	0.889428	0.411018	TRUE
O00522	O00522	Krev interaction trapped protein 1 [OS=Homo sapiens]	KRIT1	KRIT1, ankyrin repeat containing(KRIT1)	0.001	9.217	3	3	3	3	1	736	84.3	8.41	8.9	3	0	516.9	622.3	543	709	447.7	590.7	516.9	607.038	540.806	663.611	432.691	609.559		590.256	0.880745	0.317474	0.974463	0.773531	TRUE
Q9NPI8	Q9NPI8	Fanconi anemia group F protein [OS=Homo sapiens]	Fancf	Fanconi anemia complementation group F(FANCF)	0.001	12.523	12	4	4	4	1	374	42.2	8.94	10.79	4	0	572.6	475.5	515.3	567.3	525.9	462.2	572.6	463.838	513.218	530.983	508.269	476.956		551.791	0.880865	0.317943	0.897236	0.447335	TRUE
P50548	P50548	ETS domain-containing transcription factor ERF [OS=Homo sapiens]	ERF	ETS2 repressor factor(ERF)	0	68.501	39	13	26	11	1	548	58.7	7.3	85.48	13	2	2239.2	1950.7	2244.4	2365.1	2089.7	2127.6	2239.2	1902.86	2235.33	2213.69	2019.64	2195.53		2226.45	0.880889	0.242082	0.995052	0.998156	TRUE
Q9NZJ0	Q9NZJ0	Denticleless protein homolog [OS=Homo sapiens]	DTL	denticleless E3 ubiquitin protein ligase homolog(DTL)	0	77.046	35	17	29	17	1	730	79.4	8.87	86.99	17	0	2430.9	1822	1708	2776.5	1806.8	1727.1	2430.9	1777.31	1701.1	2598.75	1746.23	1782.24		2514.83	0.700554	0.00372378	0.69256	0.0450023	TRUE
Q9UJT1	Q9UJT1	tubulin delta chain [OS=Homo sapiens]	TUBD1	tubulin delta 1(TUBD1)	0.001	10.778	8	4	5	4	1	453	51	6.83	10.23	4	0	279.1	251.3	233.8	314.9	269.4	241.5	279.1	245.137	232.856	294.741	260.368	249.21		286.92	0.880916	0.247651	0.840069	0.238177	TRUE
Q9C0D4	Q9C0D4	zinc finger protein 518B [OS=Homo sapiens]	ZNF518B	zinc finger protein 518B(ZNF518B)	0	22.56	7	6	6	6	1	1074	119.5	9.45	20.06	6	0	818.6	742.4	740.4	884.2	751.3	723.5	818.6	724.192	737.409	827.595	726.113	746.598		823.098	0.881004	0.312703	0.901477	0.489749	TRUE
Q96IK1	Q96IK1	Biorientation of chromosomes in cell division protein 1 [OS=Homo sapiens]	BOD1	biorientation of chromosomes in cell division 1(BOD1)	0	19.667	22	4	10	2	1	185	19.2	6.33	30.98	4	0	356.2	330.6	302.5	374.2	310.4	282.6	356.2	322.492	301.278	350.244	299.994	291.622		353.222	0.881153	0.35032	0.839274	0.277175	TRUE
Q9Y5J1	Q9Y5J1	U3 small nucleolar RNA-associated protein 18 homolog [OS=Homo sapiens]	UTP18	UTP18, small subunit processome component(UTP18)	0	213.969	50	25	116	25	1	556	62	8.76	386.63	25	0	10018.4	8753	9187.8	10611.4	9355.6	8653.8	10018.4	8538.33	9150.68	9932.08	9041.96	8930.08		9975.24	0.881196	0.176178	0.906282	0.566266	TRUE
O15067	O15067	Phosphoribosylformylglycinamidine synthase [OS=Homo sapiens]	PFAS	phosphoribosylformylglycinamidine synthase(PFAS)	0	406.865	59	51	206	50	1	1338	144.6	5.76	712.97	51	1	20931.9	18871.4	20661.3	22315.3	19081.7	19403.1	20931.9	18408.6	20577.8	20886.7	18442	20022.6		20909.3	0.8812	0.109188	0.970869	0.981902	TRUE
Q9H5Q4	Q9H5Q4	Dimethyladenosine transferase 2, mitochondrial [OS=Homo sapiens]	TFB2M	transcription factor B2, mitochondrial(TFB2M)	0	76.372	42	18	47	18	1	396	45.3	9.19	124.6	18	0	5803.8	5426	5981.9	6531	5390.2	5619	5803.8	5292.93	5957.73	6112.9	5209.49	5798.39		5958.35	0.88132	0.239076	0.986525	0.967003	TRUE
Q7Z392	Q7Z392	trafficking protein particle complex subunit 11 [OS=Homo sapiens]	TRAPPC11	trafficking protein particle complex 11(TRAPPC11)	0	161.649	31	25	65	25	1	1133	128.8	7.14	253.68	25	0	8718.1	7833.4	8493.7	8976.1	7705.2	8368.7	8718.1	7641.28	8459.39	8401.47	7446.89	8635.88		8559.78	0.88134	0.261227	0.99858	0.913503	TRUE
Q9H4P4	Q9H4P4	E3 ubiquitin-protein ligase NRDP1 [OS=Homo sapiens]	RNF41	ring finger protein 41(RNF41)	0	20.274	23	4	4	4	1	317	35.9	6.14	20.83	4	0	583.3	516.4	573.6	588.1	512.7	500.8	583.3	503.735	571.283	550.451	495.512	516.788		566.875	0.881364	0.319885	0.959709	0.705464	TRUE
Q9UKS6	Q9UKS6	Protein kinase C and casein kinase substrate in neurons protein 3 [OS=Homo sapiens]	PACSIN3	protein kinase C and casein kinase substrate in neurons 3(PACSIN3)	0	50.347	32	11	16	11	1	424	48.5	6.18	57.97	11	0	2318.8	2084.6	1652.1	2398.7	2058.6	1729.8	2318.8	2033.47	1645.43	2245.14	1989.59	1785.03		2281.97	0.881488	0.244406	0.751643	0.106839	TRUE
O94913	O94913	Pre-mRNA cleavage complex 2 protein Pcf11 [OS=Homo sapiens]	PCF11	PCF11 cleavage and polyadenylation factor subunit(PCF11)	0	233.923	34	39	104	39	1	1555	172.9	8.48	350.92	39	0	10737.2	9742.5	9395.9	11650	9908.6	9168	10737.2	9503.56	9357.94	10904.2	9576.42	9460.7		10820.7	0.881643	0.177816	0.869567	0.37586	TRUE
Q8IZQ1-1	Q8IZQ1	WD repeat and FYVE domain-containing protein 3 [OS=Homo sapiens]	WDFY3	WD repeat and FYVE domain containing 3(WDFY3)	0	41.201	4	11	13	11	1	3526	395	6.76	39.66	11	0	448.5	471.1	469.3	549.4	402.8	459.4	448.5	459.546	467.404	514.228	389.296	474.067		481.364	0.881705	0.321218	0.977919	0.789752	TRUE
Q92540-4	Q92540	Isoform 4 of Protein SMG7 [OS=Homo sapiens]	SMG7	SMG7, nonsense mediated mRNA decay factor(SMG7)	0	137.248	24	21	67	21	1	1178	131.6	8.81	205.58	21	0	7251.5	6484.3	6247.4	7460.9	6441.7	5960.7	7251.5	6325.27	6222.16	6983.27	6225.74	6151		7117.38	0.881715	0.262875	0.869221	0.390314	TRUE
P17036-1	P17036	Zinc finger protein 3 [OS=Homo sapiens]	ZNF3	zinc finger protein 3(ZNF3)	0	29.134	27	7	8	5	1	446	50.9	7.52	26.48	7	1	348.3	311.8	292.9	380.6	328.1	279.2	348.3	304.153	291.717	356.235	317.101	288.114		352.267	0.881793	0.352899	0.822998	0.235151	TRUE
Q6PII3	Q6PII3	Coiled-coil domain-containing protein 174 [OS=Homo sapiens]	CCDC174	coiled-coil domain containing 174(CCDC174)	0	58.938	34	12	24	12	1	467	53.9	6.33	72.54	12	0	4033.4	3649.9	3458.9	4244.1	3620.5	3391.7	4033.4	3560.39	3444.93	3972.4	3499.12	3499.98		4002.9	0.881799	0.17579	0.867485	0.358877	TRUE
Q9UJX3-1	Q9UJX3	Anaphase-promoting complex subunit 7 [OS=Homo sapiens]	ANAPC7	anaphase promoting complex subunit 7(ANAPC7)	0	167.814	41	22	133	22	1	599	66.8	5.64	386.72	22	0	16784.5	14917.7	12962.2	17656.4	15336.2	12594.7	16784.5	14551.8	12909.8	16526.1	14822.1	12996.8		16655.3	0.881819	0.178127	0.77773	0.0915231	TRUE
Q9UIJ7-1	Q9UIJ7	GTP:AMP phosphotransferase AK3, mitochondrial [OS=Homo sapiens]	AK3	adenylate kinase 3(AK3)	0	126.493	74	20	60	20	1	227	25.6	9.16	196.66	20	0	6947	6204	4839.2	7761.2	5811.7	4870.1	6947	6051.84	4819.65	7264.34	5616.86	5025.58		7105.67	0.821084	0.0808037	0.692773	0.0274673	TRUE
Q8TCD5	Q8TCD5	5'(3')-deoxyribonucleotidase, cytosolic type [OS=Homo sapiens]	NT5C	5', 3'-nucleotidase, cytosolic(NT5C)	0	74.095	67	12	25	12	1	201	23.4	6.64	85.14	12	0	2331.6	2147.5	1864.6	2491.5	2088.1	1966.3	2331.6	2094.83	1857.07	2332	2018.1	2029.08		2331.8	0.881922	0.246095	0.833293	0.284287	TRUE
Q9P0J6	Q9P0J6	39S ribosomal protein L36, mitochondrial [OS=Homo sapiens]	mrpl36	mitochondrial ribosomal protein L36(MRPL36)	0.009	4.199	8	1	2	1	1	103	11.8	11.27	5.38	1	0	307.4	285.3	320.1	357.1	297.6	321	307.4	278.303	318.807	334.239	287.623	331.248		320.82	0.882	0.35374	1.01312	0.989495	FALSE
Q15773	Q15773	Myeloid leukemia factor 2 [OS=Homo sapiens]	MLF2	myeloid leukemia factor 2(MLF2)	0	53.02	44	8	17	8	1	248	28.1	6.9	69.2	8	0	765.7	687.7	636	814.3	700.5	610.9	765.7	670.834	633.431	762.17	677.016	630.404		763.935	0.882176	0.317311	0.827187	0.261611	TRUE
P52435	P52435	DNA-directed RNA polymerase II subunit RPB11-a [OS=Homo sapiens]	POLR2J	RNA polymerase II subunit J(POLR2J)	0	30.029	31	4	7	4	1	117	13.3	5.86	31.21	4	0	2815.3	2495.6	2394.7	2990.4	2605.8	2365.1	2815.3	2434.39	2385.03	2798.96	2518.44	2440.61		2807.13	0.882188	0.236161	0.859532	0.269523	TRUE
Q5SQI0-1	Q5SQI0	Alpha-tubulin N-acetyltransferase 1 [OS=Homo sapiens]	ATAT1	alpha tubulin acetyltransferase 1(ATAT1)	0.006	4.996	5	2	2	2	1	421	46.8	9.95	2.82	2	0	79.3	69.9	80.8	81.3	71.3	74	79.3	68.1857	80.4736	76.0953	68.9097	76.3625		77.6977	0.882236	0.292044	1.00927	0.819699	FALSE
O15360	O15360	Fanconi anemia group A protein [OS=Homo sapiens]	FANCA	Fanconi anemia complementation group A(FANCA)	0	71.558	14	12	21	12	1	1455	162.7	6.6	73.46	12	0	1611.4	1384.4	1445.4	1652.5	1485.6	1356.1	1611.4	1350.45	1439.56	1546.71	1435.8	1399.39		1579.06	0.88225	0.244701	0.898941	0.450031	TRUE
Q8WV74	Q8WV74	Nucleoside diphosphate-linked moiety X motif 8 [OS=Homo sapiens]	NUDT8	nudix hydrolase 8(NUDT8)	0	15.928	11	2	8	2	1	236	25.4	8.41	26.26	2	0	413.2	390.5	366	467.6	382.6	334.2	413.2	380.923	364.521	437.665	369.773	344.87		425.433	0.882274	0.35485	0.833729	0.262319	TRUE
Q92990	Q92990	Glomulin [OS=Homo sapiens]	GLMN	glomulin, FKBP associated protein(GLMN)	0	140.263	43	20	68	20	1	594	68.2	5.33	204.74	20	0	6293.8	5719.6	5971.2	6895.5	5865	5651.9	6293.8	5579.32	5947.08	6454.06	5668.38	5832.34		6373.93	0.882321	0.243406	0.924031	0.637619	TRUE
Q7Z589-5	Q7Z589	Isoform 5 of BRCA2-interacting transcriptional repressor EMSY [OS=Homo sapiens]	EMSY	EMSY, BRCA2 interacting transcriptional repressor(EMSY)	0	45.986	10	10	12	10	1	1323	141.5	9.33	40.93	10	0	957.1	965.9	967.7	1136.6	870.1	918	957.1	942.211	963.791	1063.84	840.93	947.308		1010.47	0.882334	0.251022	0.94565	0.637719	TRUE
P53582	P53582	Methionine aminopeptidase 1 [OS=Homo sapiens]	METAP1	methionyl aminopeptidase 1(METAP1)	0	128.138	65	16	52	16	1	386	43.2	7.17	169.41	16	0	5053.8	4545.3	5119.1	5349.8	4597.6	4845.7	5053.8	4433.83	5098.42	5007.32	4443.47	5000.4		5030.56	0.882337	0.272922	1.00375	0.908122	FALSE
Q8IYH5-1	Q8IYH5	ZZ-type zinc finger-containing protein 3 [OS=Homo sapiens]	ZZZ3	zinc finger ZZ-type containing 3(ZZZ3)	0	41.125	16	9	10	9	1	903	102	5.69	42.58	9	0	1382.7	1387.7	962.1	1482.7	1438.4	932.8	1382.7	1353.67	958.213	1387.78	1390.18	962.58		1385.24	0.990386	0.897509	0.693307	0.027949	TRUE
Q9HA92	Q9HA92	Radical S-adenosyl methionine domain-containing protein 1, mitochondrial [OS=Homo sapiens]	RSAD1	radical S-adenosyl methionine domain containing 1(RSAD1)	0	28.72	17	7	10	7	1	442	48.7	7.78	28.53	7	0	662.4	590.1	673.5	687.5	596.7	664.2	662.4	575.628	670.779	643.488	576.696	685.405		652.944	0.882406	0.323971	1.03852	0.922554	FALSE
Q9NU22	Q9NU22	Midasin [OS=Homo sapiens]	Mdn1	midasin AAA ATPase 1(MDN1)	0	1023.34	35	160	482	159	1	5596	632.4	5.68	1629.53	160	1	54302.3	48812	43912	57597.5	49536.7	41989	54302.3	47614.9	43734.6	53910.2	47876	43329.5		54106.3	0.882438	0.112685	0.804566	0.0829137	TRUE
Q05D32	Q05D32	CTD small phosphatase-like protein 2 [OS=Homo sapiens]	CTDSPL2	CTD small phosphatase like 2(CTDSPL2)	0	31.803	19	7	11	7	1	466	53	6.4	42.1	7	0	1052.5	894.2	834.2	1053.9	959.2	797.4	1052.5	872.269	830.83	986.431	927.043	822.858		1019.47	0.882478	0.251541	0.811056	0.197947	TRUE
Q9Y2G2-5	Q9Y2G2	Isoform 5 of Caspase recruitment domain-containing protein 8 [OS=Homo sapiens]	CARD8	caspase recruitment domain family member 8(CARD8)	0	17.589	11	4	4	4	1	537	60.6	4.84	17.5	4	0	451.8	398.7	408.2	492.1	430.9	392.1	451.8	388.922	406.551	460.597	416.454	404.618		456.198	0.882704	0.356596	0.889053	0.435811	TRUE
P06280	P06280	alpha-galactosidase A [OS=Homo sapiens]	GLA	galactosidase alpha(GLA)	0	68.354	33	11	37	11	1	429	48.7	5.6	117.52	11	0	4537.7	4311	4600.6	4968.2	4042	4449.9	4537.7	4205.27	4582.01	4650.15	3906.49	4591.97		4593.92	0.88288	0.275092	0.998491	0.931262	TRUE
P59780-1	P59780	AP-3 complex subunit sigma-2 [OS=Homo sapiens]	AP3S2	adaptor related protein complex 3 sigma 2 subunit(AP3S2)	0	19.094	35	6	11	6	1	193	22	5.22	28.08	6	0	1012.2	987	1128.1	1186.6	943.6	1134.7	1012.2	962.794	1123.54	1110.64	911.966	1170.93		1061.42	0.883139	0.253925	1.08085	0.737902	FALSE
Q96S97	Q96S97	myeloid-associated differentiation marker [OS=Homo sapiens]	MYADM	myeloid associated differentiation marker(MYADM)	0	28.008	7	1	21	1	1	322	35.3	8.15	101.77	1	0	1293.1	1145.5	1093.5	1363.6	1191.8	1190	1293.1	1117.41	1089.08	1276.31	1151.85	1227.99		1284.7	0.883182	0.248335	0.901794	0.462127	TRUE
Q9UJU2-1	Q9UJU2	Lymphoid enhancer-binding factor 1 [OS=Homo sapiens]	LEF1	lymphoid enhancer binding factor 1(LEF1)	0	18.713	13	4	5	4	1	399	44.2	7.42	19.3	4	0	1078.7	924.1	727.2	1111	913.8	721.8	1078.7	901.436	724.262	1039.88	883.165	744.844		1059.29	0.842359	0.134774	0.693441	0.0453972	TRUE
Q96QE5	Q96QE5	Transcription elongation factor, mitochondrial [OS=Homo sapiens]	TEFM	transcription elongation factor, mitochondrial(TEFM)	0	36.059	32	10	13	10	1	360	41.7	9.32	44.41	10	0	3338.4	2928.8	3068	3386.4	2991.2	2929.3	3338.4	2856.97	3055.61	3169.61	2890.92	3022.82		3254	0.883203	0.239995	0.933992	0.578936	TRUE
Q2KHR2-1	Q2KHR2	DNA-binding protein RFX7 [OS=Homo sapiens]	RFX7	regulatory factor X7(RFX7)	0	27.874	10	7	8	7	1	1363	146.8	6.76	25.48	7	0	1225.4	1116.3	1108	1323.3	1125	1162.5	1225.4	1088.92	1103.52	1238.58	1087.28	1199.61		1231.99	0.883206	0.254169	0.934721	0.591134	TRUE
Q8N122	Q8N122	Regulatory-associated protein of mTOR [OS=Homo sapiens]	RPTOR	regulatory associated protein of MTOR complex 1(RPTOR)	0	160.961	31	30	86	30	1	1335	148.9	6.89	254.98	30	0	7011.6	6134.2	5645.8	7105	6297.6	5565.8	7011.6	5983.76	5622.99	6650.15	6086.47	5743.49		6830.88	0.883505	0.248602	0.831993	0.216188	TRUE
Q9Y651	Q9Y651	Transcription factor SOX-21 [OS=Homo sapiens]	SOX21	SRY-box 21(SOX21)	0.008	4.292	4	1	1	1	1	276	28.6	9.73	2.77	1	0	130.8	117.8	103.9	130.1	112	109.8	130.8	114.911	103.48	121.771	108.245	113.305		126.286	0.883537	0.336995	0.858315	0.291572	TRUE
Q5VUA4	Q5VUA4	Zinc finger protein 318 [OS=Homo sapiens]	ZNF318	zinc finger protein 318(ZNF318)	0	223.825	26	45	110	45	1	2279	251	7.2	353.36	45	0	8061	7453.2	7835.6	8827.1	7400.6	7831.2	8061	7270.41	7803.95	8262.01	7152.5	8081.22		8161.5	0.883594	0.271238	0.973176	0.94723	TRUE
Q9NS15-1	Q9NS15	Latent-transforming growth factor beta-binding protein 3 [OS=Homo sapiens]	LTBP3	latent transforming growth factor beta binding protein 3(LTBP3)	0.009	4.137	1	1	2	1	1	1303	139.3	6.07	3.66	1	0	57.1	57.9	50.7	65.6	49.9	50	57.1	56.48	50.4952	61.4004	48.2271	51.5963		59.2502	0.883601	0.297307	0.861528	0.270118	TRUE
O95714	O95714	E3 ubiquitin-protein ligase HERC2 [OS=Homo sapiens]	HERC2	HECT and RLD domain containing E3 ubiquitin protein ligase 2(HERC2)	0	454.209	24	86	178	85	1	4834	526.9	6.28	596.74	86	1	17337.2	15546.1	14611.9	18285.4	15810.6	14127.1	17337.2	15164.8	14552.9	17114.8	15280.6	14578.1		17226	0.883704	0.185468	0.845553	0.291613	TRUE
O15049	O15049	NEDD4-binding protein 3 [OS=Homo sapiens]	N4BP3	NEDD4 binding protein 3(N4BP3)	0	17.634	9	4	5	4	1	544	60.4	8.1	13.52	4	0	480.9	406.6	331	496.9	389.3	316.5	480.9	396.628	329.663	465.089	376.249	326.605		472.995	0.817004	0.151433	0.693736	0.0470983	TRUE
Q9P2N6	Q9P2N6	KAT8 regulatory NSL complex subunit 3 [OS=Homo sapiens]	KANSL3	KAT8 regulatory NSL complex subunit 3(KANSL3)	0	62.567	18	11	22	11	1	904	95.9	9.39	71.18	11	0	3015.3	2663.1	2474.6	3116.5	2737.4	2471.2	3015.3	2597.79	2464.6	2916.99	2645.63	2550.1		2966.14	0.883878	0.24257	0.845323	0.226676	TRUE
Q86WA8	Q86WA8	Lon protease homolog 2, peroxisomal [OS=Homo sapiens]	LONP2	lon peptidase 2, peroxisomal(LONP2)	0	47.118	18	13	17	13	1	852	94.6	7.3	61.45	13	0	2088.3	1898.9	1837.7	2219	1893	1852.8	2088.3	1852.33	1830.28	2076.94	1829.54	1911.95		2082.62	0.88395	0.287965	0.898442	0.465454	TRUE
Q14684	Q14684	Ribosomal RNA processing protein 1 homolog B [OS=Homo sapiens]	RRP1B	ribosomal RNA processing 1B(RRP1B)	0	267.046	47	32	104	32	1	758	84.4	9.76	389.81	32	0	9764.5	8600	7905	10196.3	8979.8	7393.2	9764.5	8389.08	7873.07	9543.55	8678.75	7629.23		9654.03	0.883975	0.186548	0.802893	0.146468	TRUE
Q8NCY6	Q8NCY6	Myb/SANT-like DNA-binding domain-containing protein 4 [OS=Homo sapiens]	MSANTD4	Myb/SANT DNA binding domain containing 4 with coiled-coils(MSANTD4)	0	17.813	16	4	4	4	1	345	41.1	5.44	17.23	4	0	464.4	408.2	385.3	472.3	417.1	365.5	464.4	398.189	383.743	442.064	403.117	377.169		453.232	0.88399	0.361856	0.839429	0.277599	TRUE
Q5VTL8	Q5VTL8	Pre-mRNA-splicing factor 38B [OS=Homo sapiens]	PRPF38B	pre-mRNA processing factor 38B(PRPF38B)	0	87.631	23	12	43	12	1	546	64.4	10.54	136.36	12	0	5688.5	5248.2	4947.7	6374.1	5363.2	4862.6	5688.5	5119.49	4927.71	5966.04	5183.4	5017.84		5827.27	0.884023	0.250897	0.853363	0.289625	TRUE
Q8IVF7	Q8IVF7	Formin-like protein 3 [OS=Homo sapiens]	FMNL3	formin like 3(FMNL3)	0	26.922	4	4	13	3	1	1028	117.1	6.65	39.63	4	0	783.9	542.5	574.5	567.7	655.8	594.7	783.9	529.195	572.179	531.357	633.814	613.686		657.628	0.884245	0.331262	0.901623	0.463527	TRUE
Q9NYF5-1	Q9NYF5	Protein FAM13B [OS=Homo sapiens]	FAM13B	family with sequence similarity 13 member B(FAM13B)	0.003	6.731	4	2	3	2	1	915	104.5	4.94	0	2	0	50.4	56.3	44.4	61.2	41.7	49.7	50.4	54.9192	44.2206	57.2821	40.302	51.2867		53.841	0.884281	0.299952	0.886938	0.340931	TRUE
O43149	O43149	Zinc finger ZZ-type and EF-hand domain-containing protein 1 [OS=Homo sapiens]	ZZEF1	zinc finger ZZ-type and EF-hand domain containing 1(ZZEF1)	0	174.969	17	39	56	39	1	2961	330.9	5.95	176.55	39	0	5137.1	4524.1	4594.7	5422.4	4778.2	4559	5137.1	4413.14	4576.14	5075.27	4618.01	4704.55		5106.18	0.884335	0.280962	0.908769	0.537969	TRUE
P17098	P17098	Zinc finger protein 8 [OS=Homo sapiens]	ZNF8	zinc finger protein 8(ZNF8)	0.001	12.468	6	3	5	3	1	575	64.9	7.39	17.5	3	0	132.4	108.5	95.2	134	126.4	93.7	132.4	105.839	94.8154	125.422	122.162	96.6915		128.911	0.884338	0.339779	0.742788	0.082146	TRUE
Q9H9Q2	Q9H9Q2	COP9 signalosome complex subunit 7b [OS=Homo sapiens]	COPS7B	COP9 signalosome subunit 7B(COPS7B)	0	83.044	44	9	20	9	1	264	29.6	6.15	96.46	9	0	2863.4	2601.8	2786.6	3179.2	2717.4	2803.7	2863.4	2537.99	2775.34	2975.67	2626.3	2893.21		2919.54	0.884436	0.244717	0.970797	0.77682	TRUE
Q15057	Q15057	Arf-GAP with coiled-coil, ANK repeat and PH domain-containing protein 2 [OS=Homo sapiens]	ACAP2	ArfGAP with coiled-coil, ankyrin repeat and PH domains 2(ACAP2)	0	188.942	49	32	57	30	1	778	88	6.8	224.97	32	3	8847.7	7972.4	9915.2	9400.9	8102.6	9537.6	8847.7	7776.87	9875.15	8799.07	7830.96	9842.1		8823.39	0.884458	0.275149	1.11733	0.378979	FALSE
P63146	P63146	Ubiquitin-conjugating enzyme E2 B [OS=Homo sapiens]	UBE2B	ubiquitin conjugating enzyme E2 B(UBE2B)	0	25.784	32	3	12	2	1	152	17.3	5.01	51.76	3	0	313.6	258.7	259.4	312.9	293.9	231.4	313.6	252.355	258.352	292.869	284.047	238.788		303.234	0.884468	0.262187	0.819729	0.193422	TRUE
Q9NUL3	Q9NUL3	Double-stranded RNA-binding protein Staufen homolog 2 [OS=Homo sapiens]	STAU2	staufen double-stranded RNA binding protein 2(STAU2)	0	184.715	56	26	73	23	1	570	62.6	9.61	243.96	26	0	7149.5	6526.4	6934.3	7637.3	6498.7	6696.7	7149.5	6366.34	6906.29	7148.38	6280.83	6910.5		7148.94	0.884549	0.275561	0.966352	0.905883	TRUE
Q5R372-5	Q5R372	Isoform 5 of Rab GTPase-activating protein 1-like [OS=Homo sapiens]	RABGAP1L	RAB GTPase activating protein 1 like(RABGAP1L)	0	54.105	34	12	27	10	1	378	43.9	6.57	70.43	12	0	2906.7	2776.6	2847.4	3340.8	2719.9	2800.8	2906.7	2708.5	2835.9	3126.93	2628.72	2890.22		3016.81	0.884579	0.245265	0.949033	0.657049	TRUE
P62253	P62253	Ubiquitin-conjugating enzyme E2 G1 [OS=Homo sapiens]	UBE2G1	ubiquitin conjugating enzyme E2 G1(UBE2G1)	0	33.659	45	6	13	6	1	170	19.5	5.3	56.26	6	0	2054	1897.3	1450.1	2210.1	1858.4	1373.3	2054	1850.77	1444.24	2068.61	1796.1	1417.14		2061.31	0.8846	0.29054	0.694071	0.0366044	TRUE
P35232	P35232	Prohibitin [OS=Homo sapiens]	PHB	prohibitin(PHB)	0	144.183	82	18	113	18	1	272	29.8	5.76	362.49	18	0	14933.7	13693.2	12629.2	16044.8	13596.8	12590.7	14933.7	13357.4	12578.2	15017.6	13141	12992.7		14975.7	0.884713	0.189487	0.853746	0.328005	TRUE
Q7Z412	Q7Z412	Peroxisome assembly protein 26 [OS=Homo sapiens]	PEX26	peroxisomal biogenesis factor 26(PEX26)	0.001	9.387	11	2	2	2	1	305	33.9	6.35	9.87	2	0	320.5	278	288.6	338.8	303.1	399.8	320.5	271.182	287.434	317.111	292.939	412.564		318.805	0.884741	0.364951	1.09785	0.706838	FALSE
O43435-3	O43435	Isoform C of T-box transcription factor TBX1 [OS=Homo sapiens]	TBX1	T-box 1(TBX1)	0.001	10.876	7	3	4	3	1	495	52.6	8.69	13.55	3	0	310.5	323.7	262.7	387.4	289.5	298.5	310.5	315.761	261.639	362.599	279.795	308.03		336.55	0.884796	0.365176	0.846337	0.296915	TRUE
Q9Y5B8	Q9Y5B8	Nucleoside diphosphate kinase 7 [OS=Homo sapiens]	NME7	NME/NM23 family member 7(NME7)	0	74.015	53	16	34	16	1	376	42.5	6.47	108.74	16	0	6989.3	6460.8	6878.2	7548.1	6346.7	7009.7	6989.3	6302.35	6850.41	7064.89	6133.93	7233.49		7027.09	0.884881	0.277072	1.00211	0.895322	FALSE
Q9UBC2-1	Q9UBC2	Epidermal growth factor receptor substrate 15-like 1 [OS=Homo sapiens]	EPS15L1	epidermal growth factor receptor pathway substrate 15 like 1(EPS15L1)	0	262.533	59	46	85	1	1	864	94.2	5.11	310.9	46	0	146.2	126	139.7	151.7	136.7	136.3	146.2	122.91	139.136	141.988	132.117	140.651		144.094	0.884931	0.34185	0.970848	0.69749	TRUE
Q9BTK6	Q9BTK6	PAXIP1-associated glutamate-rich protein 1 [OS=Homo sapiens]	PAGR1	PAXIP1 associated glutamate rich protein 1(PAGR1)	0	32.311	35	6	7	6	1	254	27.7	4.46	28.98	6	0	821.2	761	827.4	950.2	798.3	733.1	821.2	742.336	824.058	889.37	771.537	756.505		855.285	0.885011	0.328648	0.923997	0.575625	TRUE
Q96SN8-2	Q96SN8	Isoform 2 of CDK5 regulatory subunit-associated protein 2 [OS=Homo sapiens]	CDK5RAP2	CDK5 regulatory subunit associated protein 2(CDK5RAP2)	0	285.574	35	51	88	49	1	1861	211.3	5.72	294.95	51	2	9080.5	8072.7	6807.1	9453.8	8271.8	6687.6	9080.5	7874.71	6779.6	8848.59	7994.49	6901.11		8964.54	0.885109	0.278119	0.763046	0.0951479	TRUE
P62847-4	P62847	Isoform 4 of 40S ribosomal protein S24 [OS=Homo sapiens]	RPS24	ribosomal protein S24(RPS24)	0	93.027	18	7	117	7	1	289	32.4	10.15	324	7	0	9563.6	9190.2	8832.8	10915.7	8839.9	8912.9	9563.6	8964.81	8797.12	10216.9	8543.54	9197.45		9890.25	0.885132	0.190996	0.909713	0.586161	TRUE
Q15031	Q15031	Probable Leucine--tRNA ligase, mitochondrial [OS=Homo sapiens]	LARS2	leucyl-tRNA synthetase 2, mitochondrial(LARS2)	0	201.348	43	30	103	30	1	903	101.9	8.22	359.95	30	0	11628.3	10285.4	10279.1	12376.1	10877.6	10171.7	11628.3	10033.1	10237.6	11583.8	10512.9	10496.4		11606.1	0.885145	0.191046	0.893241	0.493739	TRUE
Q96QU8	Q96QU8	Exportin-6 [OS=Homo sapiens]	XPO6	exportin 6(XPO6)	0	78.578	17	19	32	19	1	1125	128.8	6.35	104.57	19	0	4140.5	3697.5	3751.1	4390.2	3823.7	3467.1	4140.5	3606.82	3735.95	4109.15	3695.51	3577.79		4124.82	0.885169	0.187514	0.886551	0.427183	TRUE
Q9H0C5	Q9H0C5	BTB/POZ domain-containing protein 1 [OS=Homo sapiens]	BTBD1	BTB domain containing 1(BTBD1)	0	42.524	16	7	19	5	1	482	52.7	6.1	65.05	7	0	1012.5	974.1	692.3	1038.2	1017.3	667.4	1012.5	950.21	689.503	971.736	983.195	688.707		992.118	0.974382	0.728358	0.69458	0.0461474	TRUE
Q92664	Q92664	transcription factor IIIA [OS=Homo sapiens]	GTF3A	general transcription factor IIIA(GTF3A)	0	20.503	17	5	6	5	1	365	41.5	9.14	22.23	5	0	1894.1	1648.8	2213.4	2084.8	1858.7	2191.9	1894.1	1608.36	2204.46	1951.34	1796.39	2261.88		1922.72	0.8854	0.293728	1.16146	0.372175	FALSE
Q9Y2L5-1	Q9Y2L5	trafficking protein particle complex subunit 8 [OS=Homo sapiens]	TRAPPC8	trafficking protein particle complex 8(TRAPPC8)	0	197.459	32	39	81	39	1	1435	160.9	6.87	279.67	39	0	7179.3	6551.7	7361.6	7724.1	6587.5	7147.7	7179.3	6391.02	7331.86	7229.62	6366.66	7375.9		7204.46	0.885401	0.279456	1.02074	0.800634	FALSE
Q96IZ7-1	Q96IZ7	Serine/Arginine-related protein 53 [OS=Homo sapiens]	RSRC1	arginine and serine rich coiled-coil 1(RSRC1)	0	52.046	26	8	12	8	1	334	38.7	11.08	52.59	8	0	1860	1669.9	1476.7	1881.6	1632.4	1493.5	1860	1628.95	1470.73	1761.14	1577.67	1541.18		1810.57	0.885527	0.294233	0.831758	0.240504	TRUE
Q9UPN3	Q9UPN3	Microtubule-actin cross-linking factor 1, isoforms 1/2/3/5 [OS=Homo sapiens]	MACF1	microtubule-actin crosslinking factor 1(MACF1)	0	1858.43	45	286	713	69	1	7388	837.8	5.39	2619.39	286	208	73298.6	66385.4	83749.8	77634.4	66745.1	80190.4	73298.6	64757.3	83411.5	72664.4	64507.5	82750.5		72981.5	0.8856	0.122015	1.13838	0.29107	FALSE
Q9Y4W2	Q9Y4W2	Ribosomal biogenesis protein LAS1L [OS=Homo sapiens]	LAS1L	LAS1 like, ribosome biogenesis factor(LAS1L)	0	205.446	52	25	86	25	1	734	83	4.73	294.97	25	0	7933.5	7197.2	5711.4	8388.7	7200.7	5717.3	7933.5	7020.69	5688.33	7851.67	6959.3	5899.83		7892.59	0.88564	0.280556	0.734117	0.0588268	TRUE
Q9H900-1	Q9H900	Protein zwilch homolog [OS=Homo sapiens]	ZWILCH	zwilch kinetochore protein(ZWILCH)	0	119.755	30	15	52	15	1	591	67.2	6.27	178.15	15	0	6401	4227.2	4528.3	7230.2	4173.8	4508.7	6401	4123.53	4510.01	6767.34	4033.87	4652.64		6584.17	0.619471	6.38386e-05	0.695809	0.0178027	TRUE
Q8WVX9	Q8WVX9	Fatty acyl-CoA reductase 1 [OS=Homo sapiens]	FAR1	fatty acyl-CoA reductase 1(FAR1)	0	62.546	26	13	24	13	1	515	59.3	9.17	89.76	13	0	3802.2	3461.7	2904.5	4163.7	3561.9	2837.7	3802.2	3376.8	2892.77	3897.15	3442.49	2928.3		3849.67	0.885697	0.189403	0.756046	0.101164	TRUE
Q9UKV3-1	Q9UKV3	Apoptotic chromatin condensation inducer in the nucleus [OS=Homo sapiens]	ACIN1	apoptotic chromatin condensation inducer 1(ACIN1)	0	335.125	40	45	176	2	1	1341	151.8	6.43	606.94	45	44	21001.2	18920.8	18047.1	22344.1	19316	17280.2	21001.2	18456.8	17974.2	20913.7	18668.4	17831.9		20957.4	0.885728	0.122408	0.854257	0.221451	TRUE
Q9H7H0-3	Q9H7H0	Isoform 3 of Methyltransferase-like protein 17, mitochondrial [OS=Homo sapiens]	METTL17	methyltransferase like 17(METTL17)	0	25.731	14	6	8	6	1	478	53	9.14	28.99	6	0	1158.5	1076.5	998.6	1219.8	1021.6	932.6	1158.5	1050.1	994.566	1141.71	987.351	962.374		1150.11	0.885766	0.26356	0.850766	0.295321	TRUE
A8CG34-1	A8CG34	Nuclear envelope pore membrane protein POM 121C [OS=Homo sapiens]	POM121C	POM121 transmembrane nucleoporin C(POM121C)	0	112.247	17	14	48	1	1	1229	125	10.37	172.09	14	0	129.6	120.7	143.1	145.4	121.7	126.1	129.6	117.74	142.522	136.092	117.62	130.126		132.846	0.885838	0.345031	1.02618	0.951159	FALSE
Q9H0D6-1	Q9H0D6	5'-3' exoribonuclease 2 [OS=Homo sapiens]	XRN2	5'-3' exoribonuclease 2(XRN2)	0	287.046	61	41	152	41	1	950	108.5	7.47	530.09	41	0	15972.5	14703.6	11834.7	17047.6	14426.5	11839.6	15972.5	14343	11786.9	15956.2	13942.9	12217.6		15964.4	0.885905	0.19432	0.751814	0.0537024	TRUE
Q6PJP8	Q6PJP8	DNA cross-link repair 1A protein [OS=Homo sapiens]	DCLRE1A	DNA cross-link repair 1A(DCLRE1A)	0	15.959	3	3	8	3	1	1040	116.3	7.97	19.14	3	0	420.1	378.6	318.9	459.5	397.2	317.1	420.1	369.315	317.612	430.084	383.884	327.224		425.092	0.885925	0.369857	0.758466	0.112809	TRUE
Q14249	Q14249	endonuclease G, mitochondrial [OS=Homo sapiens]	endog	endonuclease G(ENDOG)	0	53.775	45	9	24	9	1	297	32.6	9.5	72.4	9	0	2438.7	1964.4	1689	2643.6	1970.6	1685.7	2438.7	1916.22	1682.18	2474.36	1904.54	1739.52		2456.53	0.777674	0.030737	0.696448	0.0478349	TRUE
Q9H5X1-1	Q9H5X1	MIP18 family protein FAM96A [OS=Homo sapiens]	FAM96A	family with sequence similarity 96 member A(FAM96A)	0	24.221	40	5	16	5	1	160	18.3	4.88	56.63	5	0	2750.2	2538.9	2537.7	2990	2524.4	2619.4	2750.2	2476.63	2527.45	2798.59	2439.77	2703.03		2774.39	0.886032	0.25092	0.942634	0.62329	TRUE
Q16773	Q16773	Kynurenine--oxoglutarate transaminase 1 [OS=Homo sapiens]	KYAT1	kynurenine aminotransferase 1(KYAT1)	0	96.255	42	14	37	13	1	422	47.8	6.47	135.69	14	1	6395.6	5903.9	5939.8	6853.6	5787.3	5933.8	6395.6	5759.1	5915.8	6414.85	5593.28	6123.24		6405.22	0.886182	0.260624	0.939784	0.733873	TRUE
Q9H9L4-1	Q9H9L4	KAT8 regulatory NSL complex subunit 2 [OS=Homo sapiens]	KANSL2	KAT8 regulatory NSL complex subunit 2(KANSL2)	0	41.137	22	9	15	9	1	492	55	6.62	46.19	9	0	1397.8	1235.4	1141.5	1444.3	1274.3	1129.2	1397.8	1205.1	1136.89	1351.84	1231.58	1165.25		1374.82	0.886182	0.260294	0.837252	0.234774	TRUE
Q96GD4-5	Q96GD4	Isoform 5 of Aurora kinase B [OS=Homo sapiens]	AURKB	aurora kinase B(AURKB)	0	94.583	53	17	43	12	1	345	39.4	9.36	139.83	17	3	3340.3	2976.4	2286.2	3422.7	3022.1	2212.3	3340.3	2903.4	2276.96	3203.59	2920.78	2282.93		3271.94	0.89002	0.2669	0.696818	0.0212032	TRUE
Q8TE02-4	Q8TE02	Isoform 4 of Elongator complex protein 5 [OS=Homo sapiens]	ELP5	elongator acetyltransferase complex subunit 5(ELP5)	0	32.911	28	6	12	6	1	323	35.7	5.02	40.04	6	0	2509.1	2248.5	2427.5	2619.5	2280	2280.7	2509.1	2193.35	2417.69	2451.8	2203.56	2353.51		2480.45	0.886314	0.263682	0.961761	0.827254	TRUE
Q01581	Q01581	hydroxymethylglutaryl-CoA synthase, cytoplasmic [OS=Homo sapiens]	HMGCS1	3-hydroxy-3-methylglutaryl-CoA synthase 1(HMGCS1)	0	287.449	61	27	172	27	1	520	57.3	5.41	588.61	27	0	17122.9	15722.9	17539.8	18563.2	15768.1	16127.8	17122.9	15337.3	17468.9	17374.8	15239.5	16642.7		17248.9	0.886342	0.196112	0.988808	0.827367	TRUE
Q99755-3	Q99755	Isoform 3 of Phosphatidylinositol 4-phosphate 5-kinase type-1 alpha [OS=Homo sapiens]	PIP5K1A	phosphatidylinositol-4-phosphate 5-kinase type 1 alpha(PIP5K1A)	0	44.516	18	9	21	6	1	549	61.1	8.34	71.33	9	0	1090.4	989.2	1120.2	1222.9	1051.3	1104	1090.4	964.94	1115.67	1144.61	1016.06	1139.25		1117.51	0.886346	0.26572	1.00891	0.93057	FALSE
Q9BZZ5-1	Q9BZZ5	Isoform 1 of Apoptosis inhibitor 5 [OS=Homo sapiens]	API5	apoptosis inhibitor 5(API5)	0	211.577	52	23	117	1	1	438	49.5	6.46	406.78	23	0	678.3	619.3	664.3	721.7	616.5	656	678.3	604.111	661.616	675.498	595.832	676.943		676.899	0.886353	0.33975	0.988744	0.841121	TRUE
Q9P2T1-2	Q9P2T1	Isoform 2 of GMP reductase 2 [OS=Homo sapiens]	GMPR2	guanosine monophosphate reductase 2(GMPR2)	0	78.927	41	13	35	10	1	366	39.8	7.65	123.12	13	2	3488.6	3233.9	3063.5	3841.6	3233.1	2928.1	3488.6	3154.59	3051.12	3595.67	3124.71	3021.58		3542.13	0.886372	0.191839	0.85721	0.325091	TRUE
Q9BSF8-2	Q9BSF8	Isoform 2 of BTB/POZ domain-containing protein 10 [OS=Homo sapiens]	BTBD10	BTB domain containing 10(BTBD10)	0	18.275	10	5	13	5	1	483	54.4	7.14	32.83	5	0	1099.1	919.3	1323.9	1098	1022.7	1134.5	1099.1	896.754	1318.55	1027.71	988.414	1170.72		1063.4	0.886384	0.26586	1.17043	0.392441	FALSE
O95881	O95881	Thioredoxin domain-containing protein 12 [OS=Homo sapiens]	TXNDC12	thioredoxin domain containing 12(TXNDC12)	0	82.748	67	8	38	8	1	172	19.2	5.4	156.83	8	0	6782.5	6191	7903.4	7263	6206.8	7564.2	6782.5	6039.16	7871.47	6798.04	5998.72	7805.69		6790.27	0.886407	0.261652	1.15438	0.221309	FALSE
Q9BWH6	Q9BWH6	RNA polymerase II-associated protein 1 [OS=Homo sapiens]	RPAP1	RNA polymerase II associated protein 1(RPAP1)	0	236.087	34	36	90	36	1	1393	152.7	6.38	349.19	36	0	7172.7	6425.7	6931.2	7639.3	6651.8	6878.8	7172.7	6268.11	6903.2	7150.25	6428.8	7098.41		7161.47	0.886473	0.284409	0.977565	0.973903	TRUE
Q53HC9	Q53HC9	Protein TSSC1 [OS=Homo sapiens]	TSSC1	tumor suppressing subtransferable candidate 1(TSSC1)	0	70.063	33	10	18	10	1	387	43.6	5.06	82.07	10	0	3270.6	2877.2	2866.5	3282.2	2914.5	2806.2	3270.6	2806.64	2854.92	3072.08	2816.79	2895.79		3171.34	0.886601	0.253159	0.906669	0.449365	TRUE
P14317	P14317	Hematopoietic lineage cell-specific protein [OS=Homo sapiens]	HCLS1	hematopoietic cell-specific Lyn substrate 1(HCLS1)	0	170.631	44	24	74	24	1	486	54	4.81	294.67	24	0	9608.4	8664.5	9642.6	10160.9	8796.5	9784.4	9608.4	8452	9603.65	9510.42	8501.6	10096.8		9559.41	0.886749	0.197343	1.03042	0.699553	FALSE
P46776	P46776	60S ribosomal protein L27a [OS=Homo sapiens]	RPL27A	ribosomal protein L27a(RPL27A)	0	60.807	43	9	49	9	1	148	16.6	11	148.01	9	0	11933.7	10875.6	10520.9	12858.7	11016.6	10130.7	11933.7	10608.9	10478.4	12035.5	10647.3	10454.1		11984.6	0.88681	0.197585	0.873309	0.393242	TRUE
Q9GZS3	Q9GZS3	WD repeat-containing protein 61 [OS=Homo sapiens]	WDR61	WD repeat domain 61(WDR61)	0	114.502	62	15	43	15	1	305	33.6	5.47	189.71	15	0	7754.8	6318.3	5286.8	7946.8	6607.5	5161.6	7754.8	6163.34	5265.44	7438.06	6385.99	5326.39		7596.43	0.826002	0.0900303	0.697158	0.0299037	TRUE
O75529-1	O75529	TAF5-like RNA polymerase II p300/CBP-associated factor-associated factor 65 kDa subunit 5L [OS=Homo sapiens]	TAF5L	TATA-box binding protein associated factor 5 like(TAF5L)	0	80.694	31	13	22	13	1	589	66.1	5.88	82.6	13	0	2366.3	2127	2150.6	2533.9	2201.6	2061.3	2366.3	2074.83	2141.91	2371.68	2127.79	2127.11		2368.99	0.887007	0.266536	0.90102	0.534402	TRUE
Q9NZV5-1	Q9NZV5	Selenoprotein N [OS=Homo sapiens]	SELENON	selenoprotein N(SELENON)	0.001	9.085	3	2	6	2	1	590	65.8	5.48	9.93	2	0	80.1	77.2	77.3	97.4	79.3	78.7	80.1	75.3066	76.9877	91.1646	76.6415	81.2126		85.6323	0.887212	0.34989	0.923718	0.504374	TRUE
Q5TCQ9-4	Q5TCQ9	Isoform 4 of Membrane-associated guanylate kinase, WW and PDZ domain-containing protein 3 [OS=Homo sapiens]	MAGI3	membrane associated guanylate kinase, WW and PDZ domain containing 3(MAGI3)	0	33	8	9	11	8	1	1481	162.8	8.09	29.97	9	0	596.2	526.1	622.8	604	535.3	695.9	596.2	513.197	620.284	565.333	517.354	718.117		580.767	0.887234	0.343336	1.15227	0.454155	FALSE
Q6UVJ0	Q6UVJ0	Spindle assembly abnormal protein 6 homolog [OS=Homo sapiens]	SASS6	SAS-6 centriolar assembly protein(SASS6)	0	123.692	40	21	52	21	1	657	74.4	7.55	179.41	21	0	4636.6	4224.2	3840.1	4893.9	4198.8	3915.7	4636.6	4120.6	3824.59	4580.6	4058.04	4040.71		4608.6	0.887323	0.293278	0.853328	0.281804	TRUE
Q5SR56	Q5SR56	Hippocampus abundant transcript-like protein 1 [OS=Homo sapiens]	MFSD14B	major facilitator superfamily domain containing 14B(MFSD14B)	0.003	6.321	4	1	1	1	1	506	54.5	5.25	5.51	1	0	169	157.7	168	192.6	161.5	183.1	169	153.832	167.321	180.27	156.086	188.946		174.635	0.887331	0.35031	1.02003	0.922223	FALSE
Q9UHV9	Q9UHV9	Prefoldin subunit 2 [OS=Homo sapiens]	PFDN2	prefoldin subunit 2(PFDN2)	0	129.596	62	10	76	10	1	154	16.6	6.58	288.43	10	0	9069.8	8034.1	8025.3	9404.7	8300.4	7743.4	9069.8	7837.06	7992.88	8802.63	8022.13	7990.61		8936.21	0.887355	0.288529	0.89431	0.504328	TRUE
Q7Z333	Q7Z333	Probable helicase senataxin [OS=Homo sapiens]	SETX	senataxin(SETX)	0	136.483	16	31	52	31	1	2677	302.7	7.17	154.37	31	0	4729.4	4285.2	4360.5	5197.8	4485.6	4194.7	4729.4	4180.1	4342.88	4865.05	4335.22	4328.62		4797.22	0.887526	0.29413	0.903804	0.511106	TRUE
Q02224	Q02224	Centromere-associated protein E [OS=Homo sapiens]	CENPE	centromere protein E(CENPE)	0	478.842	39	93	162	90	1	2701	316.2	5.64	549.66	93	3	19996.7	18200.3	16517	21452.6	18432.9	16420.1	19996.7	17753.9	16450.3	20079.2	17814.9	16944.3		20038	0.887537	0.128024	0.833283	0.150288	TRUE
Q9H2X6-1	Q9H2X6	Homeodomain-interacting protein kinase 2 [OS=Homo sapiens]	HIPK2	homeodomain interacting protein kinase 2(HIPK2)	0.003	6.393	2	3	3	1	1	1198	130.9	8.43	4.41	3	0	46.1	51	54.3	54.6	37.8	44.8	46.1	49.7492	54.0806	51.1046	36.5328	46.2303		48.6023	0.887632	0.313217	1.03196	0.925423	FALSE
Q12913-1	Q12913	Receptor-type tyrosine-protein phosphatase eta [OS=Homo sapiens]	PTPRJ	protein tyrosine phosphatase, receptor type J(PTPRJ)	0	22.792	6	6	7	6	1	1337	145.9	5.58	16.18	6	0	310	320.7	287.2	385.8	292.7	331.4	310	312.835	286.04	361.102	282.887	341.98		335.551	0.887678	0.377202	0.935804	0.623719	TRUE
Q86YW9-1	Q86YW9	Mediator of RNA polymerase II transcription subunit 12-like protein [OS=Homo sapiens]	MED12L	mediator complex subunit 12 like(MED12L)	0	21.668	2	3	10	1	1	2145	240	7.77	30.31	3	0	47.6	36.5	31.8	55.4	40.2	36.5	47.6	35.6048	31.6715	51.8534	38.8523	37.6653		49.7267	0.748663	0.0299118	0.697179	0.0378956	TRUE
Q9UBU8-2	Q9UBU8	Isoform 2 of Mortality factor 4-like protein 1 [OS=Homo sapiens]	MORF4L1	mortality factor 4 like 1(MORF4L1)	0	77.374	35	11	30	11	1	323	37.2	9.19	113.38	11	0	4674.1	4112.6	3783.6	5024.7	4464.8	3585.5	4674.1	4011.74	3768.32	4703.03	4315.12	3699.97		4688.56	0.887996	0.296103	0.796436	0.121451	TRUE
Q9H1K1	Q9H1K1	Iron-sulfur cluster assembly enzyme ISCU, mitochondrial [OS=Homo sapiens]	ISCU	iron-sulfur cluster assembly enzyme(ISCU)	0	56.41	55	9	49	9	1	167	18	9.48	124.93	9	0	3656.7	3307.6	3579.4	3885.7	3364.3	3507	3656.7	3226.48	3564.94	3636.95	3251.51	3618.96		3646.82	0.888169	0.198432	0.984954	0.875465	TRUE
Q9NYJ1-2	Q9NYJ1	Isoform 2 of Cytochrome c oxidase assembly factor 4 homolog, mitochondrial [OS=Homo sapiens]	COA4	cytochrome c oxidase assembly factor 4 homolog(COA4)	0	61.305	59	7	20	7	1	96	11.3	6.67	86.06	7	0	2475	2232	2115.9	2630.6	2285	2103.5	2475	2177.26	2107.35	2462.19	2208.4	2170.66		2468.6	0.888289	0.271868	0.866486	0.395063	TRUE
Q6ZRS2	Q6ZRS2	Helicase SRCAP [OS=Homo sapiens]	SRCAP	Snf2 related CREBBP activator protein(SRCAP)	0	190.779	16	37	76	36	1	3230	343.3	5.96	238.38	37	0	8917.6	8195.1	7649.3	9431	8039.2	7431.3	8917.6	7994.11	7618.4	8827.25	7769.69	7668.55		8872.42	0.888359	0.293269	0.861487	0.358599	TRUE
Q8IZ21-2	Q8IZ21	Isoform 2 of Phosphatase and actin regulator 4 [OS=Homo sapiens]	PHACTR4	phosphatase and actin regulator 4(PHACTR4)	0	104.726	33	14	42	14	1	712	79.1	6.73	155.19	14	0	3034.5	2760.6	2937.5	3145.6	2709.2	2881.2	3034.5	2692.9	2925.63	2944.22	2618.37	2973.18		2989.36	0.888362	0.260173	0.986635	0.867652	TRUE
Q9NX18	Q9NX18	Succinate dehydrogenase assembly factor 2, mitochondrial [OS=Homo sapiens]	SDHAF2	succinate dehydrogenase complex assembly factor 2(SDHAF2)	0.007	4.717	7	1	1	1	1	166	19.6	6.8	4.83	1	0	422.2	441.7	292.8	477.5	353.1	339.7	422.2	430.867	291.617	446.931	341.262	350.545		434.566	0.888392	0.380222	0.738855	0.0878602	TRUE
Q9BSI4-2	Q9BSI4	Isoform 2 of TERF1-interacting nuclear factor 2 [OS=Homo sapiens]	TINF2	TERF1 interacting nuclear factor 2(TINF2)	0	13.719	15	4	9	4	1	354	39.4	9.25	9.32	4	0	133.5	131.8	126.5	158.9	126.4	120.4	133.5	128.568	125.989	148.728	122.162	124.244		141.114	0.888397	0.354111	0.886635	0.375035	TRUE
Q9C0K1-1	Q9C0K1	Zinc transporter zip8 [OS=Homo sapiens]	slc39a8	solute carrier family 39 member 8(SLC39A8)	0.005	5.543	5	1	1	1	1	460	49.6	6.09	6.65	1	0	455.1	422.2	482.9	517.3	437.3	484.1	455.1	411.845	480.949	484.183	422.64	499.555		469.642	0.888427	0.38037	1.04389	0.896251	FALSE
Q9NRG4	Q9NRG4	N-lysine methyltransferase SMYD2 [OS=Homo sapiens]	SMYD2	SET and MYND domain containing 2(SMYD2)	0	74.981	35	11	23	11	1	433	49.7	6.71	76.38	11	0	1857.1	1690.9	1871.6	1969.2	1694.9	1811.2	1857.1	1649.43	1864.04	1843.14	1638.08	1869.02		1850.12	0.888459	0.306133	1.00887	0.996438	FALSE
Q8WVK7-1	Q8WVK7	Spindle and kinetochore-associated protein 2 [OS=Homo sapiens]	SKA2	spindle and kinetochore associated complex subunit 2(SKA2)	0	29.553	40	5	18	5	1	121	14.2	7.33	71.49	5	0	4577.1	4058.2	3036.2	4475.5	4031.8	2995.6	4577.1	3958.67	3023.93	4188.99	3896.63	3091.24		4383.04	0.896102	0.331534	0.697594	0.0178119	TRUE
Q8N9N2-2	Q8N9N2	Isoform 2 of Activating signal cointegrator 1 complex subunit 1 [OS=Homo sapiens]	ASCC1	activating signal cointegrator 1 complex subunit 1(ASCC1)	0	19.929	17	5	9	5	1	357	41.2	5.53	28.98	5	0	2015.4	1805.3	1749.5	2081.5	1823.5	1616.1	2015.4	1761.02	1742.43	1948.25	1762.37	1667.7		1981.82	0.888927	0.308059	0.860351	0.325401	TRUE
Q9Y5J9	Q9Y5J9	mitochondrial import inner membrane translocase subunit Tim8 B [OS=Homo sapiens]	TIMM8B	translocase of inner mitochondrial membrane 8 homolog B(TIMM8B)	0	20.851	57	4	12	4	1	83	9.3	5.12	30.13	4	0	686.4	683.4	668.5	830.7	656.8	622.3	686.4	666.639	665.799	777.52	634.781	642.167		731.96	0.888997	0.345024	0.893469	0.460961	TRUE
Q9NQX3-2	Q9NQX3	Isoform 2 of Gephyrin [OS=Homo sapiens]	GPHN	gephyrin(GPHN)	0	65.188	23	11	43	11	1	769	83.4	5.58	118.24	11	0	3541.2	3187.3	3246.8	3781.8	3296.4	3185.2	3541.2	3109.13	3233.68	3539.7	3185.89	3286.89		3540.45	0.889014	0.201589	0.920868	0.567479	TRUE
P51659-1	P51659	peroxisomal multifunctional enzyme type 2 [OS=Homo sapiens]	HSD17B4	hydroxysteroid 17-beta dehydrogenase 4(HSD17B4)	0	305.598	65	38	181	38	1	736	79.6	8.84	644.27	38	0	15854.4	14264.3	15040.2	16657.3	14531.6	14937.7	15854.4	13914.5	14979.4	15590.9	14044.4	15414.6		15722.7	0.889127	0.20783	0.966568	0.954038	TRUE
Q9BRG2	Q9BRG2	SH2 domain-containing protein 3A [OS=Homo sapiens]	SH2D3A	SH2 domain containing 3A(SH2D3A)	0	14.684	13	4	6	4	1	576	63.1	7.42	16.05	4	0	295.7	267.4	338.6	326.6	283.4	312.4	295.7	260.842	337.232	305.692	273.899	322.374		300.696	0.889173	0.282327	1.0968	0.764981	FALSE
A6NJ78	A6NJ78	Probable methyltransferase-like protein 15 [OS=Homo sapiens]	METTL15	methyltransferase like 15(METTL15)	0	30.21	18	6	9	6	1	407	46.1	8.62	35.14	6	0	694.4	645.1	691.5	782.4	661.6	674.2	694.4	629.279	688.707	732.312	639.42	695.724		713.356	0.889246	0.346066	0.970364	0.771638	TRUE
P35610	P35610	sterol O-acyltransferase 1 [OS=Homo sapiens]	SOAT1	sterol O-acyltransferase 1(SOAT1)	0	18.872	9	3	4	3	1	550	64.7	8.94	18.52	3	0	1388.9	1286.4	1441.4	1657.2	1407	1521.4	1388.9	1254.85	1435.58	1551.11	1359.83	1569.97		1470	0.889345	0.273322	1.02229	0.931749	FALSE
Q8TAQ5-2	Q8TAQ5	Isoform 2 of Zinc finger protein 420 [OS=Homo sapiens]	ZNF420	zinc finger protein 420(ZNF420)	0.001	9.871	8	3	3	1	1	536	62.9	8.57	6.47	3	0	38.9	37.2	34.1	42.9	35.2	28.6	38.9	36.2877	33.9622	40.1536	34.0199	29.5131		39.5268	0.889366	0.320226	0.80294	0.147136	TRUE
Q6NXR4	Q6NXR4	TELO2-interacting protein 2 [OS=Homo sapiens]	TTI2	TELO2 interacting protein 2(TTI2)	0	104.299	45	17	37	17	1	508	56.9	7.09	139.12	17	0	4544.4	4070	4113.4	4722.4	4142.1	3859.7	4544.4	3970.18	4096.78	4420.08	4003.24	3982.92		4482.24	0.889446	0.302245	0.901302	0.497838	TRUE
Q9UHL9-3	Q9UHL9	Isoform 3 of General transcription factor II-I repeat domain-containing protein 1 [OS=Homo sapiens]	GTF2IRD1	GTF2I repeat domain containing 1(GTF2IRD1)	0.001	11.24	7	4	5	4	1	976	107.9	7.21	11.13	4	0	198.4	202.1	151.9	243.9	188.7	155.2	198.4	197.143	151.286	228.286	182.374	160.155		213.343	0.889453	0.283562	0.729907	0.0665499	TRUE
Q27J81	Q27J81	Inverted formin-2 [OS=Homo sapiens]	INF2	inverted formin, FH2 and WH2 domain containing(INF2)	0	113.388	23	18	29	18	1	1249	135.5	5.38	114.41	18	0	3633.5	3327.9	2552	3830.8	3284.9	2532.9	3633.5	3246.28	2541.69	3585.56	3174.77	2613.77		3609.53	0.889459	0.203264	0.714145	0.0560552	TRUE
Q6NZI2-1	Q6NZI2	polymerase I and transcript release factor [OS=Homo sapiens]	PTRF	polymerase I and transcript release factor(PTRF)	0	121.119	38	16	38	16	1	390	43.5	5.6	159.14	16	0	5378.7	4701.9	5454.1	5306.1	4775.6	5232	5378.7	4586.58	5432.07	4966.41	4615.5	5399.04		5172.56	0.88951	0.30252	1.04698	0.722493	FALSE
P15121	P15121	aldose reductase [OS=Homo sapiens]	AKR1B1	aldo-keto reductase family 1 member B(AKR1B1)	0	62.134	45	11	21	10	1	316	35.8	6.98	77.01	11	0	1551.7	1380	1576	1634.7	1443.5	1487.8	1551.7	1346.16	1569.63	1530.05	1395.11	1535.3		1540.87	0.889515	0.274036	1.00752	0.996027	FALSE
O95999	O95999	B-cell lymphoma/leukemia 10 [OS=Homo sapiens]	BCL10	B-cell CLL/lymphoma 10(BCL10)	0	22.925	23	6	12	6	1	233	26.2	5.74	30.54	6	0	1294.9	1153.6	1153.9	1313	1158.6	1109.3	1294.9	1125.31	1149.24	1228.94	1119.76	1144.72		1261.92	0.889542	0.277842	0.908913	0.487831	TRUE
P24941-1	P24941	cyclin-dependent kinase 2 [OS=Homo sapiens]	CDK2	cyclin dependent kinase 2(CDK2)	0	117.988	66	18	90	15	1	298	33.9	8.68	286.63	18	0	5869.3	5604	4627.4	6504.1	5349.3	4590.5	5869.3	5466.56	4608.71	6087.72	5169.97	4737.06		5978.51	0.889563	0.276378	0.781613	0.09775	TRUE
P20273	P20273	B-cell receptor CD22 [OS=Homo sapiens]	CD22	CD22 molecule(CD22)	0.004	6.048	3	2	2	2	1	847	95.3	6.65	3.59	2	0	46	47.8	55.1	51.4	38.4	62.2	46	46.6277	54.8774	48.1095	37.1126	64.1858		47.0547	0.889818	0.322074	1.26516	0.343312	FALSE
P19525	P19525	interferon-induced, double-stranded RNA-activated protein kinase [OS=Homo sapiens]	eif2ak2	eukaryotic translation initiation factor 2 alpha kinase 2(EIF2AK2)	0	91.697	31	18	41	18	1	551	62.1	8.4	122.03	18	0	6343.8	5610.8	6390.5	6483.9	5766.4	5986	6343.8	5473.19	6364.68	6068.81	5573.08	6177.11		6206.31	0.889923	0.278094	1.01041	0.834068	FALSE
Q8NI27-1	Q8NI27	THO complex subunit 2 [OS=Homo sapiens]	THOC2	THO complex 2(THOC2)	0	293.154	36	49	152	49	1	1593	182.7	8.44	466.38	49	0	14758	14004.1	12318.7	16531.4	13702.2	11722.6	14758	13660.6	12268.9	15473.1	13242.8	12096.9		15115.5	0.889928	0.21129	0.805984	0.154508	TRUE
Q9Y547	Q9Y547	Intraflagellar transport protein 25 homolog [OS=Homo sapiens]	HSPB11	heat shock protein family B (small) member 11(HSPB11)	0	51.217	51	6	15	6	1	144	16.3	5.03	70.71	6	0	2327.1	2067.7	2139.7	2467.7	2182.8	2124.8	2327.1	2016.99	2131.06	2309.72	2109.62	2192.64		2318.41	0.889965	0.278949	0.932469	0.679892	TRUE
Q8N6N3	Q8N6N3	UPF0690 protein C1orf52 [OS=Homo sapiens]	C1orf52	chromosome 1 open reading frame 52(C1orf52)	0	62.064	43	8	37	8	1	182	20.6	5.21	126.44	8	0	3080.6	2805.1	2581.8	3256	2811.9	2537.7	3080.6	2736.3	2571.37	3047.56	2717.63	2618.72		3064.08	0.88998	0.266736	0.846925	0.231249	TRUE
Q9NP50-1	Q9NP50	Protein FAM60A [OS=Homo sapiens]	FAM60A	family with sequence similarity 60 member A(FAM60A)	0	18.577	24	4	9	4	1	221	24.8	9.41	33.78	4	0	1239	849.1	853.8	1238.4	816.2	799.1	1239	828.276	850.351	1159.12	788.837	824.612		1199.06	0.674325	0.00310696	0.698448	0.0487726	TRUE
O75362	O75362	zinc finger protein 217 [OS=Homo sapiens]	ZNF217	zinc finger protein 217(ZNF217)	0	61.788	18	14	27	13	1	1048	115.2	8.48	56.61	14	1	844.4	811.5	779.2	958.2	784.5	746.9	844.4	791.598	776.052	896.858	758.2	770.745		870.629	0.890045	0.349414	0.888322	0.442972	TRUE
P08238	P08238	Heat shock protein HSP 90-beta [OS=Homo sapiens]	HSP90AB1	heat shock protein 90 alpha family class B member 1(HSP90AB1)	0	806.216	78	66	2145	27	1	724	83.2	5.03	7134.62	66	18	143210	133665	132135	154969	130613	130920	143210	130386	131601	145048	126234	135099		144129	0.890245	0.136807	0.925213	0.622358	TRUE
O95571	O95571	Persulfide dioxygenase ETHE1, mitochondrial [OS=Homo sapiens]	ETHE1	ETHE1, persulfide dioxygenase(ETHE1)	0	44.748	35	7	21	7	1	254	27.9	6.83	71.07	7	0	1812	1579.9	1771.2	1850.8	1670.3	1749.2	1812	1541.15	1764.04	1732.32	1614.3	1805.04		1772.16	0.890286	0.313706	1.00699	0.99408	FALSE
Q9HC98-2	Q9HC98	Isoform 2 of Serine/threonine-protein kinase Nek6 [OS=Homo sapiens]	NEK6	NIMA related kinase 6(NEK6)	0	25.449	24	6	9	3	1	347	39.8	8.44	28.23	6	0	29.8	39.3	23.5	45	27.3	26	29.8	38.3362	23.4051	42.1192	26.3848	26.8301		35.9596	0.899912	0.365066	0.698494	0.0386217	TRUE
Q15131-1	Q15131	Cyclin-dependent kinase 10 [OS=Homo sapiens]	CDK10	cyclin dependent kinase 10(CDK10)	0.002	7.134	6	2	2	2	1	360	41	8.84	7.54	2	0	317.7	273.5	217.9	316.2	289.3	232.4	317.7	266.792	217.02	295.957	279.601	239.82		306.829	0.890389	0.2877	0.744453	0.0804303	TRUE
Q9BQC3	Q9BQC3	2-(3-amino-3-carboxypropyl)histidine synthase subunit 2 [OS=Homo sapiens]	DPH2	DPH2 homolog(DPH2)	0	36.218	16	6	9	6	1	489	52.1	5.53	43.13	6	0	888.7	776.7	639.8	904.9	815.6	657.1	888.7	757.651	637.215	846.97	788.257	678.078		867.835	0.890669	0.352048	0.757802	0.12702	TRUE
Q8NA42	Q8NA42	Zinc finger protein 383 [OS=Homo sapiens]	ZNF383	zinc finger protein 383(ZNF383)	0.001	8.44	5	2	2	1	1	475	54.6	7.9	7.51	2	0	24.3	24.4	25.9	29.6	23.3	25.1	24.3	23.8016	25.7954	27.7051	22.5189	25.9013		26.0025	0.890691	0.325655	0.994071	0.750527	TRUE
O43529	O43529	Carbohydrate sulfotransferase 10 [OS=Homo sapiens]	CHST10	carbohydrate sulfotransferase 10(CHST10)	0.003	6.489	7	3	3	3	1	356	42.2	8.03	8.07	3	0	31	33.7	37.7	44.8	33.2	33.3	31	32.8735	37.5477	41.932	32.087	34.3631		36.466	0.890699	0.325689	0.985998	0.714556	TRUE
Q13555-10	Q13555	Isoform 10 of Calcium/calmodulin-dependent protein kinase type II subunit gamma [OS=Homo sapiens]	CAMK2G	calcium/calmodulin dependent protein kinase II gamma(CAMK2G)	0	99.254	42	16	38	1	1	495	55.9	7.18	136.88	16	0	163.6	156.3	140.8	193.6	160.1	132.1	163.6	152.467	140.231	181.206	154.733	136.317		172.403	0.890934	0.363261	0.802041	0.165225	TRUE
Q9UBD5-1	Q9UBD5	Origin recognition complex subunit 3 [OS=Homo sapiens]	ORC3	origin recognition complex subunit 3(ORC3)	0	142.939	42	25	67	2	1	711	82.2	7.61	257.81	25	25	10549.7	9547.3	8763.4	11194.7	9748.6	8373.8	10549.7	9313.15	8728	10478	9421.78	8641.14		10513.9	0.890963	0.214601	0.826011	0.209234	TRUE
Q9BWT3	Q9BWT3	Poly(A) polymerase gamma [OS=Homo sapiens]	PAPOLG	poly(A) polymerase gamma(PAPOLG)	0	75.548	29	18	30	16	1	736	82.8	9.14	98.28	18	0	1889.5	1750.9	1878.6	2099.9	1787.3	1820.4	1889.5	1707.96	1871.01	1965.47	1727.38	1878.52		1927.48	0.891146	0.317311	0.972648	0.81344	TRUE
Q9NWD9	Q9NWD9	protein BEX4 [OS=Homo sapiens]	BEX4	brain expressed X-linked 4(BEX4)	0	21.688	60	4	12	4	1	120	14.1	6.39	19.49	4	0	415.8	370.9	427.9	414.3	366.6	407.5	415.8	361.804	426.171	387.777	354.31	420.51		401.789	0.891157	0.392044	1.05364	0.861224	FALSE
P19387	P19387	DNA-directed RNA polymerase II subunit RPB3 [OS=Homo sapiens]	POLR2C	RNA polymerase II subunit C(POLR2C)	0	77.364	64	12	27	12	1	275	31.4	4.92	112.88	12	0	2430.7	2143.8	2079.4	2446.8	2189.2	1977.9	2430.7	2091.22	2071	2290.16	2115.81	2041.05		2360.43	0.891157	0.284061	0.871037	0.412064	TRUE
Q9Y2R2-1	Q9Y2R2	Tyrosine-protein phosphatase non-receptor type 22 [OS=Homo sapiens]	PTPN22	protein tyrosine phosphatase, non-receptor type 22(PTPN22)	0.005	5.31	3	2	2	2	1	807	91.6	7.59	3.18	2	0	109.1	95.9	146.5	107.4	96.5	125.4	109.1	93.548	145.908	100.524	93.2649	129.404		104.812	0.891179	0.364152	1.31336	0.246742	FALSE
Q5TA50	Q5TA50	Ceramide-1-phosphate transfer protein [OS=Homo sapiens]	CPTP	ceramide-1-phosphate transfer protein(CPTP)	0	24.352	39	6	8	6	1	214	24.4	7.21	25.8	6	0	1204.9	1078.1	1233.6	1276.1	1124.3	1130.6	1204.9	1051.66	1228.62	1194.41	1086.61	1166.7		1199.65	0.891202	0.284286	0.998335	0.879765	TRUE
Q9UJK0	Q9UJK0	Ribosome biogenesis protein TSR3 homolog [OS=Homo sapiens]	TSR3	TSR3, acp transferase ribosome maturation factor(TSR3)	0	42.244	27	6	12	6	1	312	33.6	6.87	45.61	6	0	1450.9	1294.6	1178.1	1463.6	1294.8	1099	1450.9	1262.85	1173.34	1369.9	1251.39	1134.09		1410.4	0.891321	0.281688	0.818004	0.185774	TRUE
O15126-1	O15126	Secretory carrier-associated membrane protein 1 [OS=Homo sapiens]	SCAMP1	secretory carrier membrane protein 1(SCAMP1)	0	56.489	29	6	36	6	1	338	37.9	7.42	148.02	6	0	3039	2752.3	3287.4	3229.6	2812.9	3330.2	3039	2684.8	3274.12	3022.85	2718.6	3436.52		3030.92	0.891378	0.272499	1.10703	0.563508	FALSE
Q9BRD0	Q9BRD0	BUD13 homolog [OS=Homo sapiens]	BUD13	BUD13 homolog(BUD13)	0	64.613	21	13	20	13	1	619	70.5	9.86	63.73	13	0	2806.5	2656.1	2759.7	3075	2562.8	2736.2	2806.5	2590.96	2748.55	2878.14	2476.88	2823.56		2842.32	0.891497	0.272992	0.980203	0.830484	TRUE
Q8IYB7	Q8IYB7	DIS3-like exonuclease 2 [OS=Homo sapiens]	DIS3L2	DIS3 like 3'-5' exoribonuclease 2(DIS3L2)	0	62.727	18	16	33	16	1	885	99.2	6.1	91.19	16	0	4732.9	4351.7	4291.4	5044.4	4330.3	4204.4	4732.9	4244.97	4274.06	4721.47	4185.13	4338.63		4727.18	0.891662	0.3118	0.910975	0.550126	TRUE
Q9Y606	Q9Y606	tRNA pseudouridine synthase A, mitochondrial [OS=Homo sapiens]	PUS1	pseudouridylate synthase 1(PUS1)	0	151.329	62	28	62	28	1	427	47.4	8.41	212.97	28	0	8829.7	8086.8	7011.1	9540.1	8224.3	6683.1	8829.7	7888.47	6982.78	8929.36	7948.58	6896.46		8879.53	0.891773	0.309767	0.78153	0.126546	TRUE
Q969W3-1	Q969W3	Protein FAM104A [OS=Homo sapiens]	FAM104A	family with sequence similarity 104 member A(FAM104A)	0.002	7.318	24	2	2	1	1	186	19.5	11.27	8.14	2	0	12.2	11.3	11.6	12.9	11	9.6	12.2	11.0229	11.5531	12.0742	10.6312	9.90649		12.1371	0.892063	0.331338	0.884052	0.332337	TRUE
P10276	P10276	retinoic acid receptor alpha [OS=Homo sapiens]	RARA	retinoic acid receptor alpha(RARA)	0	16.62	13	4	4	4	1	462	50.7	7.9	13.99	4	0	312.4	264.1	244.5	299.7	280.8	217.5	312.4	257.623	243.512	280.514	271.386	224.444		296.457	0.892219	0.295917	0.789248	0.138395	TRUE
Q8NHY2-1	Q8NHY2	E3 ubiquitin-protein ligase RFWD2 [OS=Homo sapiens]	RFWD2	ring finger and WD repeat domain 2(RFWD2)	0	26.982	17	7	7	7	1	731	80.4	6.84	24.23	7	0	637	572.5	548.9	635.1	559	549.4	637	558.459	546.683	594.442	540.26	566.94		615.721	0.892221	0.364101	0.904324	0.473659	TRUE
Q9NVH1-1	Q9NVH1	DnaJ homolog subfamily C member 11 [OS=Homo sapiens]	DNAJC11	DnaJ heat shock protein family (Hsp40) member C11(DNAJC11)	0	134.911	44	20	81	20	1	559	63.2	8.4	253.67	20	0	8531.4	7832.1	7996.9	9144.6	7872.9	7810.9	8531.4	7640.02	7964.59	8559.18	7608.96	8060.27		8545.29	0.892245	0.312094	0.937643	0.735968	TRUE
Q5R372	Q5R372	rab GTPase-activating protein 1-like [OS=Homo sapiens]	RABGAP1L	RAB GTPase activating protein 1 like(RABGAP1L)	0	80.473	22	14	32	13	1	815	92.5	5.31	100.84	14	0	3212.7	2943.7	3022.2	3417.3	2948.3	3027.4	3212.7	2871.5	3009.99	3198.53	2849.46	3124.05		3205.62	0.892335	0.276491	0.956765	0.698785	TRUE
Q8N2G8-1	Q8N2G8	GH3 domain-containing protein [OS=Homo sapiens]	GHDC	GH3 domain containing(GHDC)	0	34.044	19	9	15	9	1	530	57.5	7.88	44.65	9	0	997.1	1011.4	1171.6	1290	1014.7	1238.1	997.1	986.595	1166.87	1207.42	980.682	1277.63		1102.26	0.892385	0.288938	1.10886	0.618912	FALSE
P22681	P22681	E3 ubiquitin-protein ligase CBL [OS=Homo sapiens]	CBL	Cbl proto-oncogene(CBL)	0	183.407	49	25	78	23	1	906	99.6	6.54	315.3	25	3	7741	6997.9	8946.8	8012.7	7009.4	8778.3	7741	6826.27	8910.66	7499.74	6774.41	9058.55		7620.37	0.89239	0.312814	1.17902	0.200391	FALSE
Q8IUC4	Q8IUC4	Rhophilin-2 [OS=Homo sapiens]	RHPN2	rhophilin Rho GTPase binding protein 2(RHPN2)	0	39.361	14	8	11	8	1	686	76.9	6.8	37.56	8	0	1266.1	1232	994.9	1438.9	1169.2	968.7	1266.1	1201.78	990.881	1346.78	1130	999.627		1306.44	0.892419	0.286409	0.761805	0.0858964	TRUE
O95810	O95810	Serum deprivation-response protein [OS=Homo sapiens]	SDPR	serum deprivation response(SDPR)	0	117.877	47	15	55	15	1	425	47.1	5.21	224.2	15	0	4458.1	4001.8	4618.7	4692.6	4133.3	4545.6	4458.1	3903.65	4600.04	4392.19	3994.73	4690.72		4425.14	0.892444	0.315218	1.04977	0.710927	FALSE
Q8WVC6-1	Q8WVC6	dephospho-CoA kinase domain-containing protein [OS=Homo sapiens]	DCAKD	dephospho-CoA kinase domain containing(DCAKD)	0	32.29	23	6	16	6	1	231	26.5	9.58	42.75	6	0	976	1017	991	1168.3	884.6	1068.6	976	992.058	986.997	1093.51	854.944	1102.72		1034.75	0.892484	0.289328	1.00976	0.934696	FALSE
Q13098-7	Q13098	Isoform 2 of COP9 signalosome complex subunit 1 [OS=Homo sapiens]	GPS1	G protein pathway suppressor 1(GPS1)	0	137.715	40	19	65	19	1	527	59	6.32	224.32	19	0	6172.5	5796.5	5566.8	6884.6	5800.5	5676.2	6172.5	5654.34	5544.31	6443.86	5606.04	5857.42		6308.18	0.892522	0.290685	0.903726	0.5222	TRUE
O00562	O00562	Membrane-associated phosphatidylinositol transfer protein 1 [OS=Homo sapiens]	PITPNM1	phosphatidylinositol transfer protein membrane associated 1(PITPNM1)	0	31.953	7	6	14	6	1	1244	134.8	5.95	35.94	6	0	528.5	474	506.4	541.4	477.7	504.2	528.5	462.375	504.354	506.741	461.685	520.297		517.62	0.892604	0.365728	0.989771	0.846035	TRUE
Q8N4T4-1	Q8N4T4	Rho guanine nucleotide exchange factor 39 [OS=Homo sapiens]	ARHGEF39	Rho guanine nucleotide exchange factor 39(ARHGEF39)	0.001	12.293	7	2	5	2	1	335	38.3	9.64	12.23	2	0	188.9	193.2	168.2	237.7	185	161	188.9	188.462	167.521	222.483	178.798	166.14		205.691	0.892744	0.298301	0.811071	0.176372	TRUE
Q2TAK8-1	Q2TAK8	PWWP domain-containing protein MUM1 [OS=Homo sapiens]	MUM1	melanoma associated antigen (mutated) 1(MUM1)	0	24.555	10	5	7	5	1	710	78.6	8.54	23.14	5	0	763.1	686.5	577.2	801.4	705	552	763.1	669.663	574.868	750.096	681.365	569.623		756.598	0.892831	0.36126	0.75634	0.124918	TRUE
O60547-1	O60547	GDP-mannose 4,6 dehydratase [OS=Homo sapiens]	GMDS	GDP-mannose 4,6-dehydratase(GMDS)	0	79.698	43	14	36	14	1	372	41.9	7.31	122.94	14	0	4530.3	4024.7	3859.5	4586.5	4089.5	3780.7	4530.3	3925.99	3843.91	4292.88	3952.4	3901.4		4411.59	0.89292	0.317311	0.877837	0.382796	TRUE
P12829	P12829	Myosin light chain 4 [OS=Homo sapiens]	MYL4	myosin light chain 4(MYL4)	0	181.071	88	17	96	17	1	197	21.6	5.03	348.05	17	0	14611.5	13410.5	15135.3	15624.6	13480.5	14682.4	14611.5	13081.6	15074.2	14624.3	13028.6	15151.1		14617.9	0.893088	0.225356	1.03384	0.587156	FALSE
Q99622	Q99622	Protein C10 [OS=Homo sapiens]	C12orf57	chromosome 12 open reading frame 57(C12orf57)	0	18.967	22	2	9	2	1	126	13.2	5.14	39.72	2	0	1202.4	1101.1	1109.7	1254.6	1084.9	1121.8	1202.4	1074.1	1105.22	1174.28	1048.53	1157.61		1188.34	0.893104	0.291789	0.952097	0.665901	TRUE
Q96FJ2	Q96FJ2	Dynein light chain 2, cytoplasmic [OS=Homo sapiens]	DYNLL2	dynein light chain LC8-type 2(DYNLL2)	0	68.238	65	7	85	4	1	89	10.3	7.37	280.41	7	0	4065.5	3597.4	4877	4245.4	3799.1	4685.4	4065.5	3509.17	4857.3	3973.62	3671.74	4834.99		4019.56	0.893246	0.217949	1.20564	0.27478	FALSE
Q8IX90	Q8IX90	Spindle and kinetochore-associated protein 3 [OS=Homo sapiens]	SKA3	spindle and kinetochore associated complex subunit 3(SKA3)	0	78.382	35	11	26	11	1	412	46.3	5.11	101.8	11	0	6279.2	5688.2	4257.7	6355	5523.1	4168.4	6279.2	5548.7	4240.5	5948.17	5337.94	4301.48		6113.68	0.89035	0.280135	0.698595	0.0189497	TRUE
[truncated: 7,496 more rows]
