# Supplementary material for: RBM17 Mediates Evasion of Pro-Leukemic Factors from Splicing-coupled NMD to Enforce Leukemic Stem Cell Maintenance
Source: Research Square preprint supplement (doi:10.21203/rs.3.rs-728533/v1), 2021-07-27
Supplement: Supplementary file 9 [file 145cdbc5a437bc3c6c14ac18.xlsx]

## Sheet: Alternative+mRNA splicing TCGA
UniProt	Gene	Gene Name	TCGA AML Prognosis P-value	MinusLog10(AML Prognosis P-value)	LSC+/LSC-_P-value	MinusLog10P_LSC	Avg_LSC+	Avg_LSC-
Q96NC0	ZMAT2	zinc finger matrin-type 2(ZMAT2)	0.00414	2.383	4.07895e-05	4.38945	9.67618	9.94634
Q96I25	RBM17	RNA binding motif protein 17(RBM17)	0.00568	2.24565	0.00864156	2.06341	9.72846	9.55743
Q96T37	RBM15	RNA binding motif protein 15(RBM15)	0.00677	2.16941	0.590315	0.228916	9.12403	9.09743
P07910	HNRNPC	heterogeneous nuclear ribonucleoprotein C (C1/C2)(HNRNPC)	0.00795	2.09963	0.0920849	1.03581	9.4413	9.50076
Q13435	SF3B2	splicing factor 3b subunit 2(SF3B2)	0.0131	1.88273	0.0166016	1.77985	10.4587	10.3605
Q99459	CDC5L	cell division cycle 5 like(CDC5L)	0.0159	1.7986	0.376442	0.424301	8.0477	8.00506
P08579	SNRPB2	small nuclear ribonucleoprotein polypeptide B2(SNRPB2)	0.0176	1.75449	0.0233124	1.63241	11.4909	11.3978
P57678	GEMIN4	gem nuclear organelle associated protein 4(GEMIN4)	0.0226	1.64589	0.00012868	3.89049	9.62562	9.36717
P78362	SRPK2	SRSF protein kinase 2(SRPK2)	0.0248	1.60555	0.0319213	1.49592	7.27978	7.36877
Q9BZC1	CELF4	CUGBP, Elav-like family member 4(CELF4)	0.0284	1.54668	0.516408	0.287007	6.63253	6.64398
P51991	HNRNPA3	heterogeneous nuclear ribonucleoprotein A3(HNRNPA3)	0.0302	1.51999	0.895788	0.0477948	7.91697	7.90748
Q9UQ35	SRRM2	serine/arginine repetitive matrix 2(SRRM2)	0.0392	1.40671	0.230324	0.637662	11.7788	11.7162
Q70CQ1	USP49	ubiquitin specific peptidase 49(USP49)	0.0435	1.36151	0.0278224	1.5556	10.4478	10.6767
Q9Y3C6	PPIL1	peptidylprolyl isomerase like 1(PPIL1)	0.0539	1.26841	0.00183298	2.73684	8.07499	7.87443
Q9UBB9	TFIP11	tuftelin interacting protein 11(TFIP11)	0.0641	1.19314	4.43502e-05	4.3531	8.81363	9.01084
A7MD48	SRRM4	serine/arginine repetitive matrix 4(SRRM4)	0.066	1.18046	0.346752	0.459982	6.22989	6.24548
Q92499	DDX1	DEAD-box helicase 1(DDX1)	0.0667	1.17587	2.58437e-06	5.58764	10.9223	10.6492
P83876	TXNL4A	thioredoxin like 4A(TXNL4A)	0.0702	1.15366	0.000436926	3.35959	6.94056	6.84887
Q6P2Q9	PRPF8	pre-mRNA processing factor 8(PRPF8)	0.0852	1.06956	9.82983e-05	4.00745	11.3604	11.186
P52948	NUP98	nucleoporin 98(NUP98)	0.0855	1.06803	0.345154	0.461988	7.62537	7.57558
Q9UKM9	RALY	RALY heterogeneous nuclear ribonucleoprotein(RALY)	0.0942	1.02595	0.685484	0.164003	10.7898	10.7703
O43251	RBFOX2	RNA binding protein, fox-1 homolog 2(RBFOX2)	0.0947	1.02365	0.000139296	3.85606	7.18481	6.91728
Q7RTV0	PHF5A	PHD finger protein 5A(PHF5A)	0.0977	1.01011	0.0448371	1.34836	9.6085	9.78822
Q8IYB3	SRRM1	serine and arginine repetitive matrix 1(SRRM1)	0.103	0.987163	0.106157	0.974051	10.7312	10.6717
O60306	AQR	aquarius intron-binding spliceosomal factor(AQR)	0.109	0.962574	0.0298035	1.52573	8.63972	8.70733
P17844	DDX5	DEAD-box helicase 5(DDX5)	0.11	0.958607	0.146181	0.83511	13.3297	13.2422
P61326	magoh	mago homolog, exon junction complex core component(MAGOH)	0.11	0.958607	0.0172161	1.76407	9.15809	8.90859
Q9H2H8	PPIL3	peptidylprolyl isomerase like 3(PPIL3)	0.111	0.954677	1.39818e-07	6.85444	11.3433	11.0573
Q9UMS4	PRPF19	pre-mRNA processing factor 19(PRPF19)	0.115	0.939302	0.0281851	1.54998	9.28784	9.16608
A6NFN3	RBFOX3	RNA binding protein, fox-1 homolog 3(RBFOX3)	0.116	0.935542	0.703279	0.152872	6.45188	6.44548
Q86W50	METTL16	methyltransferase like 16(METTL16)	0.119	0.924453	2.74366e-05	4.56167	7.35044	7.19244
Q8WXD5	gemin6	gem nuclear organelle associated protein 6(GEMIN6)	0.12	0.920819	0.917953	0.0371797	8.50281	8.50874
Q9Y580	RBM7	RNA binding motif protein 7(RBM7)	0.12	0.920819	0.00230898	2.63658	7.41011	7.27824
P16383	GCFC2	GC-rich sequence DNA-binding factor 2(GCFC2)	0.121	0.917215	0.658046	0.181744	6.72504	6.71677
Q01081	U2AF1	U2 small nuclear RNA auxiliary factor 1(U2AF1)	0.123	0.910095	7.36202e-05	4.133	9.8332	9.57594
Q92917	GPKOW	G-patch domain and KOW motifs(GPKOW)	0.124	0.906578	0.0407677	1.38968	7.96619	8.09728
Q8WXF0	SRSF12	serine and arginine rich splicing factor 12(SRSF12)	0.127	0.896196	0.138234	0.859384	6.37885	6.32496
P38159	RBMX	RNA binding motif protein, X-linked(RBMX)	0.13	0.886057	4.20012e-06	5.37674	10.4683	10.1565
P52272	HNRNPM	heterogeneous nuclear ribonucleoprotein M(HNRNPM)	0.139	0.856985	0.109937	0.958855	12.2848	12.2142
Q9Y4C8	RBM19	RNA binding motif protein 19(RBM19)	0.139	0.856985	0.378715	0.421687	6.76845	6.79011
Q9BX46	RBM24	RNA binding motif protein 24(RBM24)	0.145	0.838632	0.0707237	1.15044	6.49398	6.52993
Q15029	EFTUD2	elongation factor Tu GTP binding domain containing 2(EFTUD2)	0.158	0.801343	0.200569	0.697736	10.068	10.0118
P62310	LSM3	LSM3 homolog, U6 small nuclear RNA and mRNA degradation associated(LSM3)	0.158	0.801343	0.183403	0.736593	11.1871	11.1216
P62308	SNRPG	small nuclear ribonucleoprotein polypeptide G(SNRPG)	0.159	0.798603	0.621624	0.206472	12.2682	12.2967
Q9Y2W1	THRAP3	thyroid hormone receptor associated protein 3(THRAP3)	0.16	0.79588	0.233997	0.63079	7.68837	7.74112
Q15007	WTAP	Wilms tumor 1 associated protein(WTAP)	0.163	0.787812	0.0464088	1.3334	9.87017	9.95793
Q14004	CDK13	cyclin dependent kinase 13(CDK13)	0.165	0.782516	0.130227	0.885299	8.34745	8.43317
Q8WWY3	PRPF31	pre-mRNA processing factor 31(PRPF31)	0.165	0.782516	0.00225462	2.64693	10.1604	10.0543
Q8WUQ7	CACTIN	cactin, spliceosome C complex subunit(CACTIN)	0.171	0.767004	0.854744	0.0681639	7.66973	7.67569
P62318	SNRPD3	small nuclear ribonucleoprotein D3 polypeptide(SNRPD3)	0.173	0.761954	0.0140855	1.85123	8.57879	8.42143
Q96J87	CELF6	CUGBP, Elav-like family member 6(CELF6)	0.174	0.759451	0.206896	0.684248	7.48265	7.40362
Q9Y333	LSM2	LSM2 homolog, U6 small nuclear RNA and mRNA degradation associated(LSM2)	0.191	0.718967	3.02594e-07	6.51914	11.6133	11.2844
Q08170	SRSF4	serine and arginine rich splicing factor 4(SRSF4)	0.195	0.709965	0.0517805	1.28583	11.0788	11.1664
P38919	EIF4A3	eukaryotic translation initiation factor 4A3(EIF4A3)	0.196	0.707744	0.276116	0.558908	11.021	10.9599
P09661	SNRPA1	small nuclear ribonucleoprotein polypeptide A'(SNRPA1)	0.213	0.67162	0.171513	0.765704	10.9152	10.8564
Q9BQ04	RBM4B	RNA binding motif protein 4B(RBM4B)	0.221	0.655608	0.0134713	1.87059	8.7329	8.56265
Q13107	USP4	ubiquitin specific peptidase 4(USP4)	0.234	0.630784	0.547705	0.261453	7.39551	7.42514
Q92879	CELF1	CUGBP, Elav-like family member 1(CELF1)	0.244	0.61261	0.0022665	2.64464	7.13014	7.25726
Q15020	SART3	squamous cell carcinoma antigen recognized by T-cells 3(SART3)	0.264	0.578396	0.0675705	1.17024	6.74779	6.68119
Q96C86	DCPS	decapping enzyme, scavenger(DCPS)	0.269	0.570248	0.456392	0.340662	8.56109	8.61106
Q9H307	PNN	pinin, desmosome associated protein(PNN)	0.27	0.568636	0.0427175	1.36939	10.2776	10.1272
P22626	HNRNPA2B1	heterogeneous nuclear ribonucleoprotein A2/B1(HNRNPA2B1)	0.271	0.567031	0.298608	0.524898	12.274	12.338
Q8NDT2	RBM15B	RNA binding motif protein 15B(RBM15B)	0.278	0.555955	0.224366	0.649043	7.68291	7.62661
Q96IZ7	RSRC1	arginine and serine rich coiled-coil 1(RSRC1)	0.286	0.543634	1.87281e-05	4.72751	7.61619	7.90078
P61978	HNRNPK	heterogeneous nuclear ribonucleoprotein K(HNRNPK)	0.288	0.540608	0.00478424	2.32019	11.0237	10.8546
P09234	SNRPC	small nuclear ribonucleoprotein polypeptide C(SNRPC)	0.289	0.539102	0.00873423	2.05878	10.3512	10.233
Q9BWF3	RBM4	RNA binding motif protein 4(RBM4)	0.291	0.536107	0.0359428	1.44439	7.9685	7.80196
Q99590	SCAF11	SR-related CTD associated factor 11(SCAF11)	0.294	0.531653	0.467703	0.330029	10.3779	10.3388
Q9BUQ8	DDX23	DEAD-box helicase 23(DDX23)	0.318	0.497573	2.24208e-05	4.64935	8.75042	8.92952
P62995	TRA2B	transformer 2 beta homolog (Drosophila)(TRA2B)	0.318	0.497573	1.52749e-07	6.81602	11.1201	10.8566
Q9NR56	MBNL1	muscleblind like splicing regulator 1(MBNL1)	0.321	0.493495	0.777541	0.109277	10.7354	10.7515
O00148	DDX39A	DExD-box helicase 39A(DDX39A)	0.325	0.488117	0.0327804	1.48439	11.1256	11.2673
P18583	SON	SON DNA binding protein(SON)	0.328	0.484126	0.949253	0.0226179	10.8744	10.8716
Q9H0G5	NSRP1	nuclear speckle splicing regulatory protein 1(NSRP1)	0.33	0.481486	0.372109	0.42933	7.75304	7.72195
Q9Y5S9	RBM8A	RNA binding motif protein 8A(RBM8A)	0.332	0.478862	0.025607	1.59164	6.43607	6.3701
O60508	CDC40	cell division cycle 40(CDC40)	0.342	0.465974	0.0704403	1.15218	9.19184	9.28317
Q9BWJ5	SF3B5	splicing factor 3b subunit 5(SF3B5)	0.346	0.460924	0.323004	0.490792	11.0455	11.002
Q06787	FMR1	fragile X mental retardation 1(FMR1)	0.348	0.458421	#N/A	#N/A	#N/A	#N/A
O60936	NOL3	nucleolar protein 3(NOL3)	0.351	0.454693	0.143861	0.842057	6.6853	6.74082
Q9BRL6	SRSF8	serine and arginine rich splicing factor 8(SRSF8)	0.353	0.452225	7.30578e-05	4.13633	8.90908	9.41908
Q15287	RNPS1	RNA binding protein with serine rich domain 1(RNPS1)	0.361	0.442493	0.310879	0.507409	10.4986	10.459
P26368	U2AF2	U2 small nuclear RNA auxiliary factor 2(U2AF2)	0.362	0.441291	0.00300502	2.52215	10.5872	10.4871
P84103	SRSF3	serine and arginine rich splicing factor 3(SRSF3)	0.374	0.427128	9.77911e-05	4.0097	9.59139	9.3841
Q13242	SRSF9	serine and arginine rich splicing factor 9(SRSF9)	0.381	0.419075	2.76963e-06	5.55758	11.9308	11.6768
Q8NAV1	PRPF38A	pre-mRNA processing factor 38A(PRPF38A)	0.384	0.415669	0.226527	0.644879	8.82087	8.77035
Q13573	SNW1	SNW domain containing 1(SNW1)	0.384	0.415669	0.029376	1.53201	8.78798	8.86169
Q96K80	ZC3H10	zinc finger CCCH-type containing 10(ZC3H10)	0.387	0.412289	0.103722	0.984131	7.61614	7.54384
Q9HCG8	CWC22	CWC22 spliceosome associated protein homolog(CWC22)	0.394	0.404504	0.816957	0.087801	6.8431	6.83706
Q7Z333	SETX	senataxin(SETX)	0.401	0.396856	0.251507	0.59945	9.09261	9.1594
P54105	CLNS1A	chloride nucleotide-sensitive channel 1A(CLNS1A)	0.405	0.392545	8.82188e-12	11.0544	11.4163	10.9254
P31942	HNRNPH3	heterogeneous nuclear ribonucleoprotein H3(HNRNPH3)	0.405	0.392545	0.551715	0.258285	9.46732	9.43577
O60231	DHX16	DEAH-box helicase 16(DHX16)	0.407	0.390406	0.196369	0.706928	9.52064	9.5623
Q96DF8	DGCR14	DiGeorge syndrome critical region gene 14(DGCR14)	0.437	0.359519	0.766297	0.115603	7.66861	7.6584
O75475	PSIP1	PC4 and SFRS1 interacting protein 1(PSIP1)	0.437	0.359519	0.0286807	1.54241	8.62431	8.43776
Q8WXA9	SREK1	splicing regulatory glutamic acid and lysine rich protein 1(SREK1)	0.441	0.355561	0.0161973	1.79056	8.47994	8.34787
Q9NWZ8	gemin8	gem nuclear organelle associated protein 8(GEMIN8)	0.446	0.350665	2.28547e-05	4.64102	7.45891	7.29094
P55081	MFAP1	microfibrillar associated protein 1(MFAP1)	0.448	0.348722	0.131009	0.882698	8.18076	8.0906
Q9NWB1	RBFOX1	RNA binding protein, fox-1 homolog 1(RBFOX1)	0.448	0.348722	0.00396698	2.40154	6.5059	6.56108
O14893	GEMIN2	gem nuclear organelle associated protein 2(GEMIN2)	0.459	0.338187	0.00166466	2.77867	8.20031	8.0583
P08621	SNRNP70	small nuclear ribonucleoprotein U1 subunit 70(SNRNP70)	0.461	0.336299	0.00014246	3.84631	11.7373	11.4975
P98175	RBM10	RNA binding motif protein 10(RBM10)	0.461	0.336299	0.0590948	1.22845	11.3879	11.3185
P09651	HNRNPA1	heterogeneous nuclear ribonucleoprotein A1(HNRNPA1)	0.477	0.321482	0.00255119	2.59326	11.0249	10.7112
P62314	SNRPD1	small nuclear ribonucleoprotein D1 polypeptide(SNRPD1)	0.479	0.319664	0.064991	1.18715	7.79048	7.70086
Q2TAY7	SMU1	DNA replication regulator and spliceosomal factor(SMU1)	0.48	0.318759	0.13846	0.858676	8.28734	8.35605
Q00839	HNRNPU	heterogeneous nuclear ribonucleoprotein U(HNRNPU)	0.481	0.317855	0.00689263	2.16162	9.69888	10.0042
Q9HCS7	XAB2	XPA binding protein 2(XAB2)	0.481	0.317855	0.697857	0.156234	9.63344	9.65146
O00422	SAP18	Sin3A associated protein 18(SAP18)	0.485	0.314258	0.322133	0.491965	8.31744	8.26358
Q9BRR8	GPATCH1	G-patch domain containing 1(GPATCH1)	0.488	0.31158	0.177747	0.750199	6.70837	6.67317
O43660	plrg1	pleiotropic regulator 1(PLRG1)	0.491	0.308919	0.0984024	1.00699	9.69352	9.62502
O95391	SLU7	SLU7 homolog, splicing factor(SLU7)	0.492	0.308035	0.0216285	1.66497	8.78332	8.92902
O75494	SRSF10	serine and arginine rich splicing factor 10(SRSF10)	0.508	0.294136	0.69342	0.159003	9.63736	9.66256
P42285	SKIV2L2	Ski2 like RNA helicase 2(SKIV2L2)	0.509	0.293282	0.0574058	1.24104	8.59988	8.49527
O14744	PRMT5	protein arginine methyltransferase 5(PRMT5)	0.51	0.29243	2.98957e-10	9.52439	9.12191	8.66879
O94906	PRPF6	pre-mRNA processing factor 6(PRPF6)	0.511	0.291579	0.191089	0.718765	7.7424	7.66641
Q01130	SRSF2	serine and arginine rich splicing factor 2(SRSF2)	0.513	0.289883	0.816075	0.0882701	6.73258	6.72857
Q07021	C1QBP	complement C1q binding protein(C1QBP)	0.519	0.284833	2.72723e-05	4.56428	11.1361	10.8251
Q9Y3F4	STRAP	serine/threonine kinase receptor associated protein(STRAP)	0.521	0.283162	0.0406886	1.39053	10.4019	10.298
P57052	RBM11	RNA binding motif protein 11(RBM11)	0.522	0.282329	0.0664983	1.17719	6.51596	6.55757
P11940	PABPC1	poly(A) binding protein cytoplasmic 1(PABPC1)	0.526	0.279014	0.0443683	1.35293	14.0632	13.9637
Q13627	DYRK1A	dual specificity tyrosine phosphorylation regulated kinase 1A(DYRK1A)	0.532	0.274088	0.0295175	1.52992	9.86666	9.72129
Q9ULR0	ISY1	ISY1 splicing factor homolog(ISY1)	0.533	0.273273	0.243858	0.612863	9.51964	9.47774
Q6NZY4	ZCCHC8	zinc finger CCHC-type containing 8(ZCCHC8)	0.533	0.273273	0.0595546	1.22508	8.60085	8.69477
Q8TEQ6	GEMIN5	gem nuclear organelle associated protein 5(GEMIN5)	0.538	0.269218	0.0104285	1.98178	7.14015	7.05196
O43172	PRPF4	pre-mRNA processing factor 4(PRPF4)	0.543	0.2652	0.0369849	1.43198	9.61431	9.50624
P52756	RBM5	RNA binding motif protein 5(RBM5)	0.55	0.259637	0.00144423	2.84036	11.1734	10.9937
Q9H5Z1	DHX35	DEAH-box helicase 35(DHX35)	0.553	0.257275	7.81236e-05	4.10722	7.98105	7.82517
Q9P013	CWC15	CWC15 spliceosome associated protein homolog(CWC15)	0.56	0.251812	0.708363	0.149744	10.2792	10.2659
Q9UHI6	DDX20	DEAD-box helicase 20(DDX20)	0.567	0.246417	0.24974	0.602512	6.3996	6.37447
Q6UX04	CWC27	CWC27 spliceosome associated protein homolog(CWC27)	0.576	0.239578	0.334701	0.475344	9.32644	9.28332
P49756	RBM25	RNA binding motif protein 25(RBM25)	0.58	0.236572	0.103077	0.986838	10.3704	10.2866
Q9UJV9	DDX41	DEAD-box helicase 41(DDX41)	0.583	0.234331	0.110952	0.954863	9.35444	9.2751
Q96DI7	SNRNP40	small nuclear ribonucleoprotein U5 subunit 40(SNRNP40)	0.595	0.225483	0.706583	0.150837	9.58861	9.60667
Q9NUK0	MBNL3	muscleblind like splicing regulator 3(MBNL3)	0.609	0.215383	6.55868e-05	4.18318	7.63617	7.95927
Q9NW64	RBM22	RNA binding motif protein 22(RBM22)	0.612	0.213249	0.00113114	2.94648	11.5075	11.3509
O60828	PQBP1	polyglutamine binding protein 1(PQBP1)	0.616	0.210419	0.0889842	1.05069	9.73286	9.64494
Q96SB4	SRPK1	SRSF protein kinase 1(SRPK1)	0.622	0.20621	0.814515	0.0891008	9.14399	9.15736
Q13247	SRSF6	serine and arginine rich splicing factor 6(SRSF6)	0.634	0.197911	1.51858e-09	8.81856	13.0589	12.6832
Q15696	zrsr2	zinc finger CCCH-type, RNA binding motif and serine/arginine rich 2(ZRSR2)	0.64	0.19382	0.000879889	3.05557	9.51518	9.7327
Q96BP3	ppwd1	peptidylprolyl isomerase domain and WD repeat containing 1(PPWD1)	0.645	0.19044	0.000172755	3.76257	8.60664	8.43661
P52298	NCBP2	nuclear cap binding protein subunit 2(NCBP2)	0.653	0.185087	4.39842e-08	7.3567	9.68391	9.37191
Q12874	SF3A3	splicing factor 3a subunit 3(SF3A3)	0.653	0.185087	3.27381e-05	4.48495	11.0405	10.8199
P23246	SFPQ	splicing factor proline and glutamine rich(SFPQ)	0.656	0.183096	0.0675266	1.17053	7.98898	7.89065
P31483	TIA1	TIA1 cytotoxic granule associated RNA binding protein(TIA1)	0.661	0.179799	0.136787	0.863955	8.7239	8.61487
Q5SZQ8	CELF3	CUGBP, Elav-like family member 3(CELF3)	0.671	0.173277	0.0216396	1.66475	6.46843	6.51328
Q86V81	ALYREF	Aly/REF export factor(ALYREF)	0.687	0.163043	0.133048	0.875992	9.48765	9.64888
Q15459	SF3A1	splicing factor 3a subunit 1(SF3A1)	0.691	0.160522	6.03228e-05	4.21952	8.41865	8.24137
O95319	CELF2	CUGBP, Elav-like family member 2(CELF2)	0.693	0.159267	3.23414e-05	4.49024	9.51598	9.16024
Q13523	PRPF4B	pre-mRNA processing factor 4B(PRPF4B)	0.702	0.153663	0.0055473	2.25592	7.85049	7.96792
Q9HCE5	METTL14	methyltransferase like 14(METTL14)	0.711	0.14813	0.00583484	2.23397	7.41647	7.32856
O60506	SYNCRIP	synaptotagmin binding cytoplasmic RNA interacting protein(SYNCRIP)	0.714	0.146302	0.12246	0.912005	9.92626	9.8359
Q9BZJ0	CRNKL1	crooked neck pre-mRNA splicing factor 1(CRNKL1)	0.729	0.137272	3.3694e-07	6.47245	7.06864	6.84607
Q8IWL8	STH	saitohin(STH)	0.755	0.122053	0.0805361	1.09401	6.33587	6.37144
P30041	PRDX6	peroxiredoxin 6(PRDX6)	0.763	0.117475	0.000842021	3.07468	11.5459	11.3169
Q14331	FRG1	FSHD region gene 1(FRG1)	0.774	0.111259	0.00465276	2.33229	9.48069	9.66608
O60341	KDM1A	lysine demethylase 1A(KDM1A)	0.782	0.106793	8.03014e-07	6.09528	9.86237	9.57654
O75554	WBP4	WW domain binding protein 4(WBP4)	0.784	0.105684	0.16425	0.784494	8.61709	8.55732
Q7Z7F0	KIAA0907	KIAA0907(KIAA0907)	0.789	0.102923	0.312352	0.505356	9.14016	9.06599
Q96PK6	RBM14	RNA binding motif protein 14(RBM14)	0.793	0.100727	0.000788746	3.10306	10.6513	10.4719
P14866	HNRNPL	heterogeneous nuclear ribonucleoprotein L(HNRNPL)	0.797	0.0985417	0.831405	0.0801874	9.1111	9.09097
P26599	PTBP1	polypyrimidine tract binding protein 1(PTBP1)	0.797	0.0985417	0.0215261	1.66703	12.7618	12.6572
O43290	SART1	squamous cell carcinoma antigen recognized by T-cells 1(SART1)	0.797	0.0985417	0.0903673	1.04399	6.73761	6.69193
P62316	SNRPD2	small nuclear ribonucleoprotein D2 polypeptide(SNRPD2)	0.802	0.0958256	0.000123894	3.90695	13.6967	13.5432
Q15428	SF3A2	splicing factor 3a subunit 2(SF3A2)	0.814	0.0893756	0.252497	0.597744	10.2638	10.21
Q9BRX9	WDR83	WD repeat domain 83(WDR83)	0.814	0.0893756	0.000641415	3.19286	8.14662	7.91236
Q6NYC1	JMJD6	arginine demethylase and lysine hydroxylase(JMJD6)	0.815	0.0888424	0.98955	0.00456246	8.07626	8.07523
P62306	SNRPF	small nuclear ribonucleoprotein polypeptide F(SNRPF)	0.82	0.0861861	1.87215e-05	4.72766	11.9861	11.7098
P15172	MYOD1	myogenic differentiation 1(MYOD1)	0.835	0.0783135	0.201839	0.694995	6.63861	6.66782
Q96MU7	YTHDC1	YTH domain containing 1(YTHDC1)	0.838	0.076756	0.227671	0.642692	10.8057	10.7435
Q9UNP9	PPIE	peptidylprolyl isomerase E(PPIE)	0.842	0.0746879	0.0246199	1.60871	8.7588	8.64714
Q9H6T0	ESRP2	epithelial splicing regulatory protein 2(ESRP2)	0.846	0.0726296	0.07887	1.10309	6.37691	6.32636
O95926	SYF2	SYF2 pre-mRNA splicing factor(SYF2)	0.848	0.0716041	0.111012	0.95463	10.9338	10.8498
Q07955	SRSF1	serine and arginine rich splicing factor 1(SRSF1)	0.852	0.0695604	0.00511845	2.29086	11.3317	11.2006
O75643	SNRNP200	small nuclear ribonucleoprotein U5 subunit 200(SNRNP200)	0.861	0.0649968	0.139687	0.854843	8.13584	8.05683
P41223	BUD31	BUD31 homolog(BUD31)	0.864	0.0634863	2.25755e-05	4.64636	10.5828	10.8195
O43395	PRPF3	pre-mRNA processing factor 3(PRPF3)	0.867	0.0619809	0.424746	0.371871	9.80426	9.84239
Q15637	SF1	splicing factor 1(SF1)	0.888	0.051587	0.650662	0.186644	8.77268	8.8127
Q13123	IK	IK cytokine, down-regulator of HLA II(IK)	0.889	0.0510982	0.0214483	1.66861	9.65932	9.75485
Q13595	TRA2A	transformer 2 alpha homolog(TRA2A)	0.897	0.0472076	0.233957	0.630865	9.41032	9.31245
Q86U44	mettl3	methyltransferase like 3(METTL3)	0.905	0.0433514	0.000276823	3.5578	9.10758	8.88094
Q08211	DHX9	DExH-box helicase 9(DHX9)	0.917	0.0376307	0.930182	0.0314323	8.29529	8.28904
Q92841	DDX17	DEAD-box helicase 17(DDX17)	0.92	0.0362122	0.699973	0.154919	9.67688	9.64236
Q16629	SRSF7	serine and arginine rich splicing factor 7(SRSF7)	0.929	0.0319843	0.000395368	3.403	10.3029	10.0303
Q5VZF2	MBNL2	muscleblind like splicing regulator 2(MBNL2)	0.93	0.0315171	0.0480342	1.31845	8.0917	8.26516
Q13243	SRSF5	serine and arginine rich splicing factor 5(SRSF5)	0.93	0.0315171	6.62236e-08	7.17899	13.3853	13.0074
Q92620	DHX38	DEAH-box helicase 38(DHX38)	0.938	0.0277972	0.920913	0.0357815	8.43084	8.43468
Q15393	SF3B3	splicing factor 3b subunit 3(SF3B3)	0.939	0.0273344	0.761631	0.118255	8.47378	8.49311
Q9NVM4	PRMT7	protein arginine methyltransferase 7(PRMT7)	0.94	0.0268721	5.53971e-09	8.25651	7.61127	7.24507
Q8WUF8	FAM172A	family with sequence similarity 172 member A(FAM172A)	0.947	0.02365	0.01476	1.83091	9.16072	9.04276
Q9H840	GEMIN7	gem nuclear organelle associated protein 7(GEMIN7)	0.961	0.0172766	0.880504	0.0552688	6.69171	6.6882
Q14562	DHX8	DEAH-box helicase 8(DHX8)	0.964	0.015923	0.01558	1.80743	7.22654	7.32073
Q12872	SFSWAP	splicing factor SWAP homolog(SFSWAP)	0.965	0.0154727	0.458086	0.339053	8.83939	8.81412
P52597	HNRNPF	heterogeneous nuclear ribonucleoprotein F(HNRNPF)	0.967	0.0145735	0.544892	0.26369	7.28262	7.25898
O43390	HNRNPR	heterogeneous nuclear ribonucleoprotein R(HNRNPR)	0.97	0.0132283	0.140153	0.853399	11.2312	11.1342
P62304	SNRPE	small nuclear ribonucleoprotein polypeptide E(SNRPE)	0.97	0.0132283	0.156976	0.804167	6.44125	6.41288
Q8N6W0	CELF5	CUGBP, Elav-like family member 5(CELF5)	0.975	0.0109954	0.034074	1.46758	6.61405	6.67037
P14678	SNRPB	small nuclear ribonucleoprotein polypeptides B and B1(SNRPB)	0.979	0.00921731	0.615246	0.210951	11.2732	11.3015
P31943	HNRNPH1	heterogeneous nuclear ribonucleoprotein H1 (H)(HNRNPH1)	0.986	0.00612309	0.231576	0.635307	11.3511	11.2338
O75533	SF3B1	splicing factor 3b subunit 1(SF3B1)	0.999	0.000434512	0.000746535	3.12695	11.2541	11.0385
Q13838	DDX39B	DExD-box helicase 39B(DDX39B)	n/a	#VALUE!	0.0947326	1.0235	11.1735	11.0873
P0DJD3	RBMY1A1	RNA binding motif protein, Y-linked, family 1, member A1(RBMY1A1)	n/a	#VALUE!	0.653489	0.184762	6.33609	6.32545
Q16637	SMN1	survival of motor neuron 1, telomeric(SMN1)	n/a	#VALUE!	0.316214	0.500019	8.2742	8.19824
P55769	SNU13	SNU13 homolog, small nuclear ribonucleoprotein (U4/U6.U5)(SNU13)	n/a	#VALUE!	0.000372264	3.42915	11.0179	10.8159
Q15415	RBMY1F	RNA binding motif protein, Y-linked, family 1, member F(RBMY1F)	n/a	#VALUE!	0.583067	0.234282	6.49998	6.48157

## Sheet: LSC + v -
ID	Gene Symbol	Avg_LSC+	Avg_LSC-	p-value	Avg_LSC+-
ILMN_2055271	A1BG	6.79821	6.82241	0.247547	6.8077
ILMN_1736007	A1BG	6.57169	6.57692	0.781373	6.57374
ILMN_3234888	A1BG-AS1	6.70111	6.62003	0.000544891	6.66932
ILMN_2383229	A1CF	6.51735	6.54251	0.272476	6.52721
ILMN_1779670	A1CF	6.49054	6.45023	0.0941641	6.47473
ILMN_1806310	A1CF	6.45608	6.48929	0.165871	6.4691
ILMN_1773603	A2M	6.75653	6.7673	0.554227	6.76075
ILMN_1745607	A2M	6.21322	6.20658	0.75435	6.21062
ILMN_2136495	A2ML1	6.1265	6.15536	0.257066	6.13782
ILMN_2295559	A3GALT2	6.51877	6.55246	0.169465	6.53198
ILMN_1668111	A3GALT2	6.42618	6.4388	0.618722	6.43113
ILMN_1735045	A4GALT	6.553	6.62827	0.374556	6.58251
ILMN_1680754	A4GNT	6.58987	6.6139	0.381916	6.59929
ILMN_1755321	AAAS	7.15843	7.057	0.0100884	7.11866
ILMN_1698554	AACS	7.38292	7.20682	0.000370156	7.31388
ILMN_1814092	AACSP1	6.80602	6.90079	0.00393091	6.84317
ILMN_1760414	AADAC	6.79873	6.77658	0.526121	6.79005
ILMN_1752884	AADACL2	6.54127	6.55714	0.435743	6.54749
ILMN_1812867	AADACL3	6.6166	6.61722	0.973855	6.61684
ILMN_1660703	AADACL3	6.4485	6.46752	0.332351	6.45596
ILMN_1668851	AADACL4	6.20192	6.16132	0.100902	6.186
ILMN_3281480	AADACP1	6.84821	6.86583	0.613077	6.85512
ILMN_3204975	AADACP1	6.62244	6.55488	0.0708525	6.59595
ILMN_1726986	AADAT	7.18069	6.99889	0.0181104	7.10941
ILMN_2270015	AADAT	6.55847	6.54495	0.483606	6.55317
ILMN_2357031	AADAT	6.22572	6.26844	0.0247035	6.24247
ILMN_1809959	AADAT	6.23213	6.23513	0.872003	6.23331
ILMN_1717229	AAED1	8.80365	8.54857	0.00171036	8.70364
ILMN_3237396	AAGAB	8.52841	8.538	0.842075	8.53217
ILMN_1688755	AAK1	7.77549	7.80346	0.631974	7.78646
ILMN_1880387	AAK1	6.40471	6.42414	0.350994	6.41233
ILMN_1689211	AAK1	6.33918	6.27736	0.0166513	6.31494
ILMN_1779163	AAMDC	9.32252	8.98539	9.29789e-08	9.19034
ILMN_1653165	AAMP	8.38621	8.4575	0.0880081	8.41416
ILMN_1729835	AANAT	6.14401	6.13998	0.825958	6.14243
ILMN_1721225	AAR2	9.12537	8.96997	0.000102895	9.06444
ILMN_2159290	AARD	6.34531	6.37661	0.153145	6.35758
ILMN_1662364	AARS	10.6166	10.578	0.556383	10.6015
ILMN_1674698	AARS2	8.31741	8.09684	4.07572e-07	8.23093
ILMN_1700461	AARSD1	9.01891	8.83336	0.000369023	8.94616
ILMN_1784269	AASDH	7.96923	7.83825	0.0006129	7.91787
ILMN_2096191	AASDHPPT	8.56228	8.46822	0.124229	8.5254
ILMN_1698189	AASDHPPT	7.74716	7.71551	0.378726	7.73475
ILMN_2157219	AASS	6.68869	6.68384	0.851204	6.68679
ILMN_1678323	AASS	6.67899	6.66934	0.770459	6.67521
ILMN_1756131	AATBC	6.98705	7.27453	0.0217322	7.09976
ILMN_3256375	AATBC	6.46583	6.54793	0.135451	6.49802
ILMN_1703743	AATF	9.24258	9.38188	0.000157599	9.2972
ILMN_1699334	AATK	7.305	7.44793	0.000486443	7.36104
ILMN_1687609	AATK	6.87414	6.85196	0.316054	6.86545
ILMN_2068874	AATK	6.59965	6.60369	0.832339	6.60123
ILMN_3236041	AATK	6.38944	6.37178	0.315465	6.38251
ILMN_3282066	ABAT	6.6187	6.60901	0.618365	6.6149
ILMN_1805104	ABAT	6.61356	6.58277	0.369677	6.60149
ILMN_1670117	ABAT	6.57863	6.60973	0.0936106	6.59083
ILMN_2404407	ABAT	6.33091	6.33586	0.846491	6.33285
ILMN_1766054	ABCA1	8.21997	8.34572	0.374222	8.26927
ILMN_1753388	ABCA10	6.70814	6.73812	0.181092	6.7199
ILMN_2070570	ABCA11P	6.58506	6.56437	0.245727	6.57695
ILMN_2361400	ABCA12	6.28466	6.27848	0.734249	6.28224
ILMN_1750250	ABCA12	6.10942	6.11568	0.741068	6.11188
ILMN_1704579	ABCA13	6.19411	6.19765	0.961105	6.1955
ILMN_1803580	ABCA17P	6.69305	6.71111	0.340289	6.70013
ILMN_1747627	ABCA2	7.53326	7.14239	0.000147461	7.38001
ILMN_1687636	ABCA2	6.44049	6.43484	0.786527	6.43827
ILMN_1758523	ABCA3	6.90042	6.8672	0.459068	6.8874
ILMN_1794965	ABCA4	6.52751	6.56251	0.0871273	6.54123
ILMN_1784176	ABCA5	6.45699	6.44816	0.754213	6.45353
ILMN_1749001	ABCA5	6.41136	6.43946	0.217778	6.42238
ILMN_1722286	ABCA5	6.29385	6.26306	0.228856	6.28178
ILMN_1701551	ABCA6	6.79895	6.83772	0.631365	6.81415
ILMN_1795507	ABCA6	6.79027	6.79508	0.93185	6.79216
ILMN_1743205	ABCA7	8.90263	9.16135	0.0251061	9.00406
ILMN_1729894	ABCA7	6.43305	6.47341	0.0672582	6.44887
ILMN_2259319	ABCA7	6.40444	6.42889	0.22531	6.41403
ILMN_1796801	ABCA8	6.72555	6.72584	0.989798	6.72567
ILMN_2129886	ABCA8	6.40808	6.43017	0.296879	6.41674
ILMN_1720501	ABCA9	6.86771	6.90149	0.175253	6.88096
ILMN_1668446	ABCA9	6.5563	6.48849	0.14115	6.52971
ILMN_1812070	ABCB1	7.45811	7.38995	0.607478	7.43138
ILMN_2094875	ABCB1	6.94964	6.77216	0.186621	6.88006
ILMN_1665730	ABCB10	8.98716	9.46487	1.37389e-06	9.17445
ILMN_3291778	ABCB10	7.27068	7.55194	0.000932565	7.38095
ILMN_2232066	ABCB11	6.65399	6.68998	0.103512	6.6681
ILMN_1767349	ABCB4	6.46446	6.69877	0.0003057	6.55633
ILMN_1658257	ABCB5	6.1535	6.16187	0.673917	6.15678
ILMN_2193980	ABCB6	7.58488	8.01107	0.00103801	7.75198
ILMN_1687840	ABCB7	8.65143	8.65296	0.97502	8.65203
ILMN_2102422	ABCB8	6.57374	6.57112	0.904781	6.57272
ILMN_2343048	ABCB9	7.58961	7.57603	0.872374	7.58429
ILMN_2343047	ABCB9	7.17829	7.22494	0.47078	7.19658
ILMN_1788928	ABCB9	6.76206	6.78909	0.367299	6.77266
ILMN_1802404	ABCC1	7.71527	7.32634	4.24597e-06	7.56278
ILMN_2335302	ABCC1	6.79175	6.66973	1.70688e-05	6.74391
ILMN_1776119	ABCC10	7.2112	7.2396	0.619152	7.22234
ILMN_1732140	ABCC11	6.72863	6.7608	0.132534	6.74124
ILMN_1713008	ABCC11	6.32545	6.33226	0.698569	6.32812
ILMN_2358714	ABCC11	6.14655	6.14496	0.933889	6.14592
ILMN_1762093	ABCC12	6.41074	6.43098	0.443167	6.41867
ILMN_1678409	ABCC13	6.81204	7.08396	4.84374e-05	6.91865
ILMN_1774344	ABCC13	6.77586	6.82776	0.0315021	6.79621
ILMN_1709092	ABCC13	6.25254	6.51963	0.000423449	6.35726
ILMN_1676278	ABCC2	6.59162	6.55308	0.240698	6.57651
ILMN_1717466	ABCC3	6.70011	6.69656	0.86868	6.69872
ILMN_1788457	ABCC4	8.70276	8.40174	0.0405942	8.58474
ILMN_2194009	ABCC4	8.08583	7.80404	0.0410459	7.97535
ILMN_1651964	ABCC5	8.48108	8.3769	0.176299	8.44024
ILMN_1706531	ABCC5	8.31767	8.4623	0.0396426	8.37437
ILMN_2302358	ABCC5	6.24548	6.20364	0.241163	6.22908
ILMN_2406654	ABCC6	6.80383	6.71566	0.0132249	6.76926
ILMN_1801521	ABCC6	6.61278	6.64316	0.181592	6.62469
ILMN_2293902	ABCC6	6.61001	6.6166	0.766947	6.6126
ILMN_3244070	ABCC6P2	6.99244	6.94948	0.153357	6.97559
ILMN_1767129	ABCC8	6.14841	6.12341	0.242734	6.13861
ILMN_2366473	ABCC9	6.71171	6.71549	0.837303	6.71319
ILMN_1751453	ABCC9	6.3471	6.34682	0.987747	6.34699
ILMN_1772189	ABCD1	7.12224	7.16462	0.525382	7.13886
ILMN_1652959	ABCD2	6.54891	6.52771	0.229223	6.5406
ILMN_2198897	ABCD2	6.17018	6.14008	0.150272	6.15838
ILMN_1674032	ABCD3	7.51772	7.43238	0.054696	7.48426
ILMN_1746032	ABCD4	6.69717	6.56638	1.46219e-05	6.64589
ILMN_1737656	ABCD4	6.58721	6.58074	0.774484	6.58467
ILMN_1651501	ABCD4	6.60067	6.54731	0.015292	6.57975
ILMN_2343917	ABCD4	6.5483	6.45917	0.00221504	6.51335
ILMN_2330267	ABCE1	9.38812	8.95904	1.66677e-08	9.21989
ILMN_1676846	ABCE1	8.91778	8.51722	2.93956e-09	8.76073
ILMN_1763875	ABCF1	10.3483	10.4364	0.0333609	10.3828
ILMN_2392635	ABCF1	9.08135	9.16691	0.0942877	9.1149
ILMN_3309544	ABCF1	6.88673	6.94307	0.0412955	6.90882
ILMN_1781999	ABCF2	8.04711	7.95485	0.116327	8.01094
ILMN_1669201	ABCF2	7.11805	7.11902	0.977725	7.11844
ILMN_2284941	ABCF2	6.64453	6.58691	0.288312	6.62194
ILMN_1810085	ABCF3	7.24919	7.1846	0.226685	7.22387
ILMN_1794782	ABCG1	7.84811	7.33269	5.21443e-06	7.64603
ILMN_1658176	ABCG1	6.93971	6.98656	0.163484	6.95807
ILMN_2329927	ABCG1	6.96447	6.56151	2.11084e-07	6.80648
ILMN_1695968	ABCG1	6.82608	6.76134	0.0687271	6.8007
ILMN_2262362	ABCG1	6.73952	6.76704	0.227613	6.75031
ILMN_1743638	ABCG1	6.39193	6.37023	0.416755	6.38342
ILMN_1789641	ABCG2	6.13522	6.19843	0.0290992	6.16
ILMN_1779470	ABCG4	6.84307	6.90531	0.00767921	6.86747
ILMN_1716592	ABCG5	6.68001	6.70988	0.0927209	6.69172
ILMN_1680309	ABCG8	6.57068	6.61506	0.0814869	6.58808
ILMN_1743371	ABHD1	6.72999	6.6008	3.79296e-05	6.67934
ILMN_1770031	ABHD10	8.39607	8.2683	0.0129995	8.34598
ILMN_2338268	ABHD11	7.05786	7.15401	0.0441458	7.09556
ILMN_1737475	ABHD11	6.78152	6.81216	0.648608	6.79353
ILMN_1753912	ABHD11	6.53228	6.54221	0.713024	6.53617
ILMN_2245305	ABHD12	8.01295	8.05408	0.343632	8.02908
ILMN_2318685	ABHD12	7.53498	7.52748	0.846304	7.53204
ILMN_1745116	ABHD12	7.35036	7.34202	0.861323	7.34709
ILMN_1698311	ABHD12B	6.89343	6.96101	0.0257673	6.91992
ILMN_1707925	ABHD12B	6.8028	6.83244	0.430002	6.81442
ILMN_2367487	ABHD12B	6.32911	6.31931	0.798212	6.32527
ILMN_1785285	ABHD13	6.67842	6.67191	0.713055	6.67587
ILMN_2073969	ABHD13	6.607	6.64547	0.130919	6.62208
ILMN_1794213	ABHD14A	8.91911	8.63312	0.00014049	8.80698
ILMN_2227533	ABHD14B	8.31621	8.1293	0.00993558	8.24293
ILMN_1769390	ABHD15	8.04088	7.96647	0.310169	8.0117
ILMN_2152402	ABHD16A	9.13474	9.21681	0.0919796	9.16691
ILMN_1805483	ABHD16B	6.47855	6.4796	0.949997	6.47896
ILMN_2239772	ABHD17A	8.43904	8.49618	0.44664	8.46144
ILMN_2307978	ABHD17A	7.37067	7.46135	0.130396	7.40623
ILMN_1730549	ABHD17A	6.87722	6.95407	0.0198102	6.90735
ILMN_1679363	ABHD17A	6.71955	6.73459	0.394926	6.72545
ILMN_2140623	ABHD17A	6.07663	6.14224	0.00942855	6.10235
ILMN_1785661	ABHD17B	7.74947	7.5534	0.00743202	7.6726
ILMN_2374362	ABHD17B	7.50542	7.31783	0.0223587	7.43188
ILMN_1660440	ABHD17B	7.47546	7.35701	0.0923218	7.42902
ILMN_1668336	ABHD17B	6.50059	6.50647	0.768176	6.5029
ILMN_1788416	ABHD17C	7.87097	7.85805	0.90388	7.8659
ILMN_1761963	ABHD18	7.76805	7.57688	0.000473851	7.6931
ILMN_1723662	ABHD2	7.44853	7.55666	0.00542547	7.49092
ILMN_2403446	ABHD2	7.04612	6.99878	0.254615	7.02756
ILMN_1785389	ABHD2	6.41037	6.39835	0.563506	6.40566
ILMN_1787618	ABHD2	6.28483	6.29684	0.493107	6.28954
ILMN_1801767	ABHD3	8.36492	8.35892	0.94763	8.36257
ILMN_1700633	ABHD4	7.56566	7.41989	0.0325479	7.5085
ILMN_1655702	ABHD5	7.09346	7.92011	3.99762e-13	7.41756
ILMN_1706344	ABHD6	7.47742	7.69529	0.00125124	7.56284
ILMN_1712707	ABHD8	8.27935	8.3532	0.156717	8.3083
ILMN_2329958	ABI1	9.1042	9.17486	0.13957	9.1319
ILMN_1739081	ABI1	6.75554	6.81271	0.0142144	6.77796
ILMN_1724497	ABI2	7.93826	7.80415	0.0107617	7.88568
ILMN_1720988	ABI2	6.89215	6.86514	0.385984	6.88156
ILMN_1775944	ABI2	6.71971	6.63221	0.000650509	6.68541
ILMN_1707274	ABI2	6.44032	6.45282	0.641791	6.44522
ILMN_1755658	ABI3	7.13467	7.9134	1.01447e-06	7.43999
ILMN_1673639	ABI3BP	6.53554	6.44837	0.0147603	6.50136
ILMN_1713732	ABL1	8.73737	8.53172	0.000273754	8.65674
ILMN_1708922	ABL1	7.84579	7.84156	0.938791	7.84413
ILMN_2268241	ABL1	6.64358	6.61083	0.185612	6.63074
ILMN_2240003	ABL2	6.76717	6.73451	0.0945283	6.75436
ILMN_1657870	ABL2	6.66505	6.73068	0.0451984	6.69078
ILMN_1741628	ABL2	6.63297	6.59709	0.176178	6.6189
ILMN_1785424	ABLIM1	9.2093	8.83006	0.0628907	9.06061
ILMN_2396672	ABLIM1	7.6369	7.39646	0.0629037	7.54263
ILMN_1731610	ABLIM1	6.97753	7.00633	0.519182	6.98882
ILMN_1696682	ABLIM1	6.65912	6.63387	0.250733	6.64922
ILMN_1758825	ABLIM2	6.2994	6.32456	0.328608	6.30926
ILMN_1656940	ABLIM3	6.36323	6.34116	0.395678	6.35458
ILMN_1656979	ABO	6.22477	6.19887	0.322784	6.21462
ILMN_1672878	ABR	10.107	10.2185	0.254608	10.1507
ILMN_1655114	ABR	6.91907	6.87803	0.221361	6.90298
ILMN_1657045	ABR	6.53328	6.54355	0.636053	6.53731
ILMN_1766991	ABRA	6.26009	6.27022	0.561644	6.26406
ILMN_1720858	ABRACL	10.042	10.0695	0.686527	10.0528
ILMN_3237177	ABRAXAS1	11.2817	11.3852	0.345699	11.3222
ILMN_1748290	ABRAXAS1	6.32685	6.33908	0.658112	6.33164
ILMN_1762615	ABRAXAS2	9.04826	9.00147	0.315955	9.02992
ILMN_1658083	ABT1	7.21126	7.1497	0.0384741	7.18712
ILMN_1802096	ABTB1	9.17423	9.41974	0.000781824	9.27048
ILMN_2367165	ABTB1	8.27534	8.43333	0.0230128	8.33728
ILMN_1753370	ABTB2	6.86348	6.76669	0.0689437	6.82553
ILMN_1738921	ACAA1	9.96797	9.99206	0.754096	9.97741
ILMN_1660199	ACAA2	8.90282	9.09746	0.00217826	8.97913
ILMN_2331636	ACACA	9.04963	8.57093	4.03346e-10	8.86194
ILMN_1772123	ACACA	8.85053	8.46562	2.20278e-07	8.69962
ILMN_1667641	ACACA	6.13934	6.12783	0.548194	6.13482
ILMN_1763852	ACACB	7.42571	7.29147	0.169284	7.37308
ILMN_1687303	ACAD10	8.20061	8.05075	0.000244808	8.14186
ILMN_1761058	ACAD11	9.16128	8.81285	3.41022e-05	9.02467
ILMN_2225595	ACAD8	8.65361	8.64076	0.710724	8.64858
ILMN_1775579	ACAD9	8.92449	8.86207	0.175069	8.90002
ILMN_1660890	ACADL	6.51418	6.49511	0.360573	6.5067
ILMN_2053679	ACADM	10.5473	10.2382	2.49021e-09	10.4261
ILMN_1778104	ACADM	9.42791	9.26743	0.0225502	9.36499
ILMN_1740920	ACADSB	6.82155	6.82163	0.996793	6.82158
ILMN_1806408	ACADVL	12.165	12.1057	0.26544	12.1418
ILMN_2352009	ACADVL	9.71003	9.62166	0.234134	9.67538
ILMN_2263466	ACADVL	7.70214	7.62833	0.294896	7.6732
ILMN_1740675	ACAN	6.36156	6.36822	0.796907	6.36417
ILMN_1777182	ACAN	6.35306	6.31843	0.124298	6.33949
ILMN_1693148	ACAN	6.10978	6.12468	0.433196	6.11562
ILMN_1808395	ACAP1	10.1364	9.74638	0.000154931	9.98346
ILMN_2088825	ACAP2	8.41741	8.49008	0.186184	8.4459
ILMN_3236270	ACAP2	8.2855	8.29711	0.863805	8.29005
ILMN_1766798	ACAP2	8.30295	8.25	0.367793	8.28219
ILMN_1743847	ACAP3	6.65988	6.47653	1.76758e-05	6.58799
ILMN_1800008	ACAT1	9.83051	9.91319	0.331286	9.86293
ILMN_1708672	ACAT2	9.37456	9.25669	0.0783418	9.32835
ILMN_2133799	ACAT2	6.602	6.61114	0.695124	6.60558
ILMN_1665945	ACBD3	8.62834	8.82646	6.90829e-05	8.70602
ILMN_1693250	ACBD5	6.54797	6.49531	0.0601872	6.52732
ILMN_2410362	ACBD5	6.35376	6.35657	0.903305	6.35486
ILMN_2295980	ACBD5	6.32898	6.32435	0.816067	6.32716
ILMN_2106002	ACBD7	6.54612	6.57207	0.193015	6.55629
ILMN_3187680	ACCS	10.2637	9.90208	0.000618369	10.1219
ILMN_2154287	ACCS	8.21588	7.87767	0.000155651	8.08327
ILMN_1780630	ACCSL	6.34041	6.35503	0.525757	6.34614
ILMN_3242266	ACCSL	6.33694	6.32902	0.66696	6.33383
ILMN_1716480	ACD	8.76685	8.72013	0.253337	8.74853
ILMN_1779984	ACE	6.55372	6.53275	0.315155	6.5455
ILMN_2339410	ACE	6.01766	6.00716	0.634315	6.01354
ILMN_1667018	ACE2	6.58997	6.60393	0.563004	6.59544
ILMN_3241214	ACER1	6.53374	6.52244	0.528609	6.52931
ILMN_1773243	ACER1	6.1497	6.17554	0.21878	6.15983
ILMN_1761000	ACER2	6.79974	6.78128	0.46914	6.7925
ILMN_1812552	ACER3	9.12236	9.42569	6.80313e-05	9.24129
ILMN_3237774	ACER3	6.96589	7.11281	0.00376684	7.02349
ILMN_1780485	ACHE	6.50514	6.55983	0.0143708	6.52658
ILMN_2333219	ACHE	6.44518	6.63353	0.000590658	6.51902
ILMN_1699636	ACIN1	9.5753	9.46151	0.00546813	9.53069
ILMN_1723684	ACKR1	6.46764	7.17429	1.02705e-05	6.7447
ILMN_3304022	ACKR2	13.2233	12.7473	6.41319e-08	13.0366
ILMN_1763127	ACKR2	6.52658	6.72341	0.00475617	6.60375
ILMN_1798360	ACKR3	7.92707	7.76232	0.279656	7.86248
ILMN_2371458	ACKR3	7.06957	6.91762	0.174544	7.00999
ILMN_1781769	ACKR4	6.49037	6.51313	0.190031	6.49929
ILMN_1773992	ACKR4	6.43341	6.41532	0.279072	6.42632
ILMN_2371379	ACLY	10.4079	10.4251	0.620461	10.4147
ILMN_1749014	ACLY	8.92908	8.9327	0.952025	8.9305
ILMN_1727091	ACMSD	6.44503	6.4335	0.571339	6.44051
ILMN_1750800	ACO1	9.14767	9.05667	0.126562	9.11199
ILMN_1654861	ACO2	8.40457	8.56583	0.00244388	8.46779
ILMN_1838319	ACOD1	6.53744	6.57394	0.0724913	6.55175
ILMN_3193271	ACOD1	6.3671	6.3938	0.109194	6.37757
ILMN_1715543	ACOT1	7.53378	7.15702	2.5773e-08	7.38606
ILMN_2121389	ACOT1	6.55287	6.53857	0.438652	6.54726
ILMN_1739594	ACOT11	7.42932	7.00598	7.01359e-08	7.26334
ILMN_2353978	ACOT11	6.93933	6.97066	0.394802	6.95161
ILMN_1785474	ACOT12	6.36059	6.35215	0.678871	6.35728
ILMN_2098743	ACOT13	9.32605	9.06592	2.21206e-05	9.22406
ILMN_1716237	ACOT2	7.94571	7.688	0.000141826	7.84467
ILMN_2188959	ACOT2	6.26365	6.21652	0.0317652	6.24517
ILMN_1764321	ACOT4	7.85798	7.34918	2.91275e-07	7.65849
ILMN_2156699	ACOT6	6.55648	6.60323	0.0283982	6.57481
ILMN_1740265	ACOT7	9.60414	9.31764	0.00698807	9.49181
ILMN_2332250	ACOT7	8.48093	8.13958	0.00103596	8.3471
ILMN_1784756	ACOT7	7.1325	6.55886	3.23921e-09	6.90759
ILMN_1728883	ACOT7	6.61834	6.59375	0.263232	6.6087
ILMN_1788078	ACOT7	6.56125	6.6056	0.0251607	6.57864
ILMN_2252621	ACOT7	6.43719	6.41829	0.452558	6.42978
ILMN_1719178	ACOT7	6.3104	6.30538	0.78019	6.30843
ILMN_1679600	ACOT8	7.59343	7.59383	0.993195	7.59359
ILMN_1658995	ACOT9	8.49059	8.56447	0.366148	8.51956
ILMN_2367070	ACOT9	7.9842	8.20637	0.000325423	8.07131
ILMN_1750158	ACOX1	7.87575	7.89778	0.698663	7.88439
ILMN_1765767	ACOX1	6.30647	6.29416	0.573462	6.30165
ILMN_1668839	ACOX1	6.28512	6.27365	0.500939	6.28062
ILMN_1685703	ACOX2	6.90393	7.0627	0.18496	6.96618
ILMN_1743680	ACOXL	6.25776	6.30288	0.0278971	6.27545
ILMN_1652430	ACOXL-AS1	6.5003	6.51628	0.531309	6.50656
ILMN_1709900	ACOXL-AS1	6.42578	6.48154	0.0070505	6.44764
ILMN_2344956	ACP1	11.0767	11.1166	0.615517	11.0923
ILMN_1669633	ACP1	9.76858	9.67999	0.192937	9.73385
ILMN_2104830	ACP2	8.17512	8.27413	0.163691	8.21394
ILMN_1728331	ACP4	6.78959	6.82835	0.272916	6.80478
ILMN_2351906	ACP4	6.6898	6.60981	0.000299361	6.65844
ILMN_2078599	ACP5	7.02493	7.73044	3.11115e-07	7.30154
ILMN_2234343	ACP6	7.83222	7.28804	6.98655e-12	7.61886
ILMN_1709725	ACP7	6.53597	6.54859	0.526454	6.54092
ILMN_1758323	ACPP	7.25743	7.59469	0.00114162	7.38966
ILMN_1705637	ACR	6.40727	6.40995	0.914798	6.40832
ILMN_1784203	ACRBP	7.24196	7.16167	0.219365	7.21048
ILMN_2320277	ACRV1	6.49242	6.52364	0.161845	6.50466
ILMN_1654468	ACRV1	6.40986	6.42989	0.334874	6.41771
ILMN_2227011	ACSBG1	6.84777	6.91643	0.268099	6.87469
ILMN_1730002	ACSBG2	6.34581	6.30978	0.0970596	6.33168
ILMN_3236756	ACSF2	7.98529	7.83084	0.00641267	7.92473
ILMN_1716832	ACSF3	7.05169	7.05257	0.988391	7.05204
ILMN_1684585	ACSL1	8.19162	8.7082	0.000386994	8.39416
ILMN_2360705	ACSL3	9.00582	9.0624	0.286452	9.028
ILMN_1654414	ACSL3	7.04922	7.14373	0.0112966	7.08628
ILMN_1666096	ACSL3	6.97079	7.02798	0.167531	6.99321
ILMN_1683598	ACSL4	8.88101	9.0625	0.00461365	8.95217
ILMN_2391458	ACSL4	6.98949	7.09575	0.00224377	7.03115
ILMN_2285506	ACSL4	6.44138	6.44912	0.664018	6.44441
ILMN_1691714	ACSL4	6.08521	6.07842	0.723551	6.08255
ILMN_1705247	ACSL5	9.97734	9.87814	0.0867781	9.93845
ILMN_2370882	ACSL5	8.09798	7.94509	0.0131403	8.03804
ILMN_2273911	ACSL5	6.58488	6.59648	0.547074	6.58943
ILMN_1678517	ACSL5	6.48929	6.4363	0.12525	6.46852
ILMN_1807914	ACSL5	6.09198	6.10702	0.470113	6.09787
ILMN_1737418	ACSL6	6.81035	7.12325	6.49505e-05	6.93303
ILMN_2278242	ACSL6	6.30719	6.41466	0.00825707	6.34933
ILMN_2378555	ACSL6	6.33244	6.32782	0.813216	6.33063
ILMN_1730025	ACSL6	6.22476	6.24699	0.274182	6.23348
ILMN_1661434	ACSM1	6.14812	6.15261	0.806662	6.14988
ILMN_1809623	ACSM2A	6.42889	6.41219	0.367279	6.42234
ILMN_1754517	ACSM2A	6.22214	6.20204	0.323335	6.21426
ILMN_1746128	ACSM2B	6.54953	6.5636	0.514104	6.55505
ILMN_1765912	ACSM2B	6.53068	6.53496	0.836833	6.53236
ILMN_1657592	ACSM2B	6.36692	6.37175	0.785554	6.36881
ILMN_3269141	ACSM2B	6.3553	6.35509	0.99117	6.35522
ILMN_1771084	ACSM3	8.65922	8.25585	0.011128	8.50107
ILMN_1685952	ACSM3	7.26751	7.10279	0.0702786	7.20293
ILMN_1662738	ACSM3	7.22628	6.98631	0.0183975	7.13219
ILMN_1791923	ACSM4	6.53695	6.56901	0.0880075	6.54952
ILMN_1805147	ACSM5	6.89275	6.98436	0.000697734	6.92867
ILMN_2070792	ACSM5	6.52361	6.48347	0.0940465	6.50788
ILMN_1801698	ACSM5	6.46378	6.48935	0.270825	6.47381
ILMN_1766966	ACSM5	6.32553	6.35524	0.174852	6.33718
ILMN_1784933	ACSM6	6.48663	6.504	0.316228	6.49344
ILMN_2100936	ACSM6	6.4618	6.43611	0.208932	6.45173
ILMN_1752269	ACSS1	9.55763	9.35742	0.0199721	9.47913
ILMN_1714197	ACSS2	10.2418	10.0059	0.00346928	10.1493
ILMN_2336595	ACSS2	10.0573	9.82349	0.0040919	9.96562
ILMN_1697510	ACSS2	6.83187	6.79851	0.443892	6.81879
ILMN_1742859	ACSS2	6.58821	6.59043	0.916063	6.58908
ILMN_2254962	ACSS2	6.24216	6.21763	0.229257	6.23254
ILMN_1659885	ACSS3	6.63465	6.61193	0.314725	6.62574
ILMN_2125869	ACTA1	6.54427	6.51136	0.174414	6.53137
ILMN_1671703	ACTA2	9.73432	9.46022	0.0534862	9.62685
ILMN_2152131	ACTB	14.55	14.7394	0.00260043	14.6243
ILMN_2038777	ACTB	13.8637	14.1212	0.000837987	13.9646
ILMN_1777296	ACTB	13.6822	13.7477	0.571885	13.7079
ILMN_3246895	ACTBL2	6.48123	6.48468	0.849349	6.48258
ILMN_2139989	ACTBL2	6.24491	6.24386	0.954884	6.2445
ILMN_1658660	ACTC1	6.39649	6.43387	0.0531428	6.41114
ILMN_2053178	ACTG1	14.7274	14.6112	0.00505132	14.6818
ILMN_1704961	ACTG1	13.1685	12.9108	0.0508327	13.0675
ILMN_3274790	ACTG1P17	9.35825	9.50665	0.0956038	9.41643
ILMN_1795325	ACTG2	6.12106	6.12601	0.79555	6.123
ILMN_1749297	ACTL6A	9.48598	9.40077	0.234276	9.45257
ILMN_2328280	ACTL6A	8.60232	8.56235	0.57312	8.58665
ILMN_1657855	ACTL6B	6.48042	6.49658	0.314503	6.48676
ILMN_1717900	ACTL7A	6.21573	6.18646	0.0982921	6.20425
ILMN_1796088	ACTL7B	6.47412	6.52052	0.0416532	6.49231
ILMN_1704078	ACTL8	6.36404	6.36557	0.946664	6.36464
ILMN_1656193	ACTL9	6.13278	6.13687	0.827138	6.13438
ILMN_2232177	ACTN1	9.54231	9.40348	0.370291	9.48788
ILMN_1654422	ACTN2	6.43024	6.42496	0.759864	6.42817
ILMN_1665691	ACTN3	6.39147	6.37068	0.41914	6.38332
ILMN_1725534	ACTN4	9.87144	9.77193	0.043235	9.83243
ILMN_1798254	ACTR10	9.52487	9.55246	0.599114	9.53569
ILMN_1792314	ACTR1A	9.58081	9.64499	0.104368	9.60597
ILMN_1695821	ACTR1B	9.54807	9.17141	3.37041e-08	9.4004
ILMN_2388605	ACTR2	11.6569	11.6919	0.613205	11.6707
ILMN_1657153	ACTR3	8.74721	9.0088	0.000397102	8.84977
ILMN_2260392	ACTR3B	6.92685	6.82941	0.000764226	6.88865
ILMN_1787513	ACTR3B	6.82113	6.77232	0.0960737	6.80199
ILMN_2346451	ACTR3B	6.64207	6.66439	0.263884	6.65082
ILMN_1774191	ACTR3B	6.59648	6.58385	0.570455	6.59153
ILMN_3248795	ACTR3B	6.33279	6.32415	0.668583	6.32941
ILMN_1688029	ACTR3BP2	6.39751	6.41138	0.494569	6.40295
ILMN_3185198	ACTR3C	6.84923	6.76188	0.00881565	6.81499
ILMN_1772938	ACTR3C	6.74652	6.7645	0.447478	6.75357
ILMN_3244484	ACTR3C	6.57085	6.60437	0.0962944	6.58399
ILMN_3283203	ACTR3C	6.47882	6.47903	0.991134	6.4789
ILMN_1694898	ACTR3C	6.39155	6.40205	0.638875	6.39567
ILMN_1652594	ACTR5	8.12348	7.90526	7.12218e-05	8.03792
ILMN_1697585	ACTR6	8.79169	8.62338	0.000183832	8.7257
ILMN_1689162	ACTR8	7.43668	7.2824	7.63915e-05	7.37619
ILMN_1815392	ACTRT1	7.17958	7.3875	6.10951e-05	7.2611
ILMN_1776442	ACTRT2	6.63712	6.6585	0.340613	6.6455
ILMN_3241416	ACTRT2	6.20601	6.21292	0.714068	6.20872
ILMN_1782810	ACTRT3	6.53245	6.39712	0.000224711	6.47939
ILMN_1760490	ACVR1	9.09512	8.68474	8.0896e-06	8.93422
ILMN_2243308	ACVR1B	7.87869	8.13779	0.0237996	7.98028
ILMN_1763916	ACVR1B	6.75384	6.84399	0.0122392	6.78919
ILMN_1766723	ACVR1B	6.47449	6.46617	0.662647	6.47122
ILMN_1786544	ACVR1B	6.46483	6.46159	0.885207	6.46356
ILMN_1689217	ACVR1C	6.60804	6.61607	0.755256	6.61119
ILMN_2152711	ACVR2A	6.83042	6.76411	0.157025	6.80442
ILMN_1670912	ACVR2A	6.6636	6.70798	0.0689851	6.681
ILMN_1668983	ACVR2B	6.36383	6.36437	0.976577	6.36404
ILMN_1824337	ACVR2B	6.27079	6.29712	0.257227	6.28111
ILMN_3179067	ACVR2B-AS1	6.71832	6.71482	0.848359	6.71695
ILMN_3251776	ACVR2B-AS1	6.35875	6.37651	0.313958	6.36571
ILMN_3250257	ACVRL1	6.76546	6.87896	0.198343	6.80996
ILMN_1807493	ACVRL1	6.22465	6.26091	0.447453	6.23887
ILMN_1683883	ACY1	8.17434	7.97249	0.0107635	8.0952
ILMN_1670193	ACY3	7.22883	6.8852	0.00489727	7.0941
ILMN_1694233	ACYP1	9.90207	9.54154	1.27665e-06	9.76072
ILMN_2319825	ACYP1	8.73171	8.46639	0.000115848	8.62769
ILMN_1686432	ACYP1	6.91923	6.87604	0.362671	6.9023
ILMN_2158705	ACYP2	8.64933	8.42645	0.000563075	8.56194
ILMN_1697550	ACYP2	6.87959	6.86693	0.570371	6.87463
ILMN_1803686	ADA	11.0144	10.283	5.29091e-06	10.7276
ILMN_1751851	ADA2	9.52803	10.6322	7.95353e-06	9.96095
ILMN_1686283	ADA2	6.49847	6.73463	8.0406e-05	6.59106
ILMN_1666174	ADA2	6.43119	6.44086	0.702693	6.43498
ILMN_1745580	ADAD1	6.49521	6.5253	0.163707	6.50701
ILMN_1745108	ADAD2	6.15848	6.11351	0.0549785	6.14085
ILMN_1725043	ADAL	7.60801	7.52106	0.0139313	7.57392
ILMN_1718946	ADAM10	7.49569	7.60464	0.181557	7.53841
ILMN_2148360	ADAM10	6.61945	6.65217	0.305734	6.63228
ILMN_1711374	ADAM11	6.58719	6.45997	2.04147e-06	6.53731
ILMN_1726266	ADAM12	6.59053	6.64133	0.00631999	6.61045
ILMN_1705689	ADAM12	6.57824	6.61438	0.124079	6.59241
ILMN_1785393	ADAM12	6.52709	6.48829	0.0409941	6.51188
ILMN_1756920	ADAM15	11.0867	10.9937	0.313859	11.0503
ILMN_2384544	ADAM15	8.80409	8.73603	0.477559	8.77741
ILMN_1751500	ADAM15	7.37943	7.39838	0.737929	7.38686
ILMN_2121068	ADAM17	9.19352	9.20296	0.884904	9.19722
ILMN_1765779	ADAM17	7.12853	7.20237	0.101071	7.15748
ILMN_2201386	ADAM18	6.3968	6.39798	0.951583	6.39726
ILMN_1713751	ADAM19	7.6338	8.73536	1.42339e-09	8.06569
ILMN_1788481	ADAM19	6.33175	6.35637	0.181066	6.3414
ILMN_1682225	ADAM19	6.2567	6.23396	0.268982	6.24778
ILMN_1662675	ADAM2	6.80828	6.77486	0.12778	6.79518
ILMN_1737629	ADAM20	6.11199	6.09729	0.450025	6.10623
ILMN_3204682	ADAM20P1	6.62371	6.64318	0.435125	6.63134
ILMN_1812112	ADAM21	6.38497	6.33115	0.021115	6.36387
ILMN_3241313	ADAM21P1	6.36806	6.35912	0.63294	6.36456
ILMN_1706302	ADAM22	6.38115	6.39219	0.70221	6.38548
ILMN_2351754	ADAM22	6.28106	6.2648	0.333929	6.27469
ILMN_1675210	ADAM22	6.24856	6.26164	0.534095	6.25369
ILMN_2060086	ADAM23	6.24595	6.23566	0.816129	6.24191
ILMN_1664631	ADAM28	7.5598	7.41402	0.159586	7.50264
ILMN_1802100	ADAM28	6.99799	6.85002	0.0470134	6.93997
ILMN_1664236	ADAM28	6.46883	6.45338	0.656812	6.46277
ILMN_2194158	ADAM29	6.51043	6.55231	0.0745243	6.52685
ILMN_2100871	ADAM30	6.41615	6.39549	0.276103	6.40805
ILMN_1806841	ADAM32	6.74784	6.70191	0.0246141	6.72983
ILMN_1703383	ADAM32	6.63698	6.62945	0.693562	6.63403
ILMN_1798045	ADAM32	6.55179	6.53206	0.308346	6.54406
ILMN_2293012	ADAM32	6.16057	6.18098	0.408063	6.16857
ILMN_1651657	ADAM33	6.596	6.54476	0.0209987	6.57591
ILMN_1671297	ADAM33	6.46285	6.44226	0.391126	6.45478
ILMN_1669486	ADAM3A	6.59934	6.66325	0.00953749	6.62439
ILMN_2223911	ADAM3A	6.50025	6.5208	0.300611	6.50831
ILMN_1795204	ADAM3A	6.46231	6.51254	0.0186679	6.482
ILMN_1783312	ADAM6	6.60047	6.61054	0.523298	6.60442
ILMN_1750294	ADAM7	6.39309	6.37053	0.315611	6.38425
ILMN_1708348	ADAM8	8.64629	8.70022	0.715416	8.66743
ILMN_1727524	ADAM9	6.79566	6.89889	0.0258511	6.83614
ILMN_2103107	ADAMDEC1	6.83354	6.76662	0.413448	6.8073
ILMN_1716909	ADAMDEC1	6.6518	6.626	0.463735	6.64168
ILMN_1673566	ADAMTS1	6.55673	6.56157	0.93623	6.55863
ILMN_1751168	ADAMTS10	6.33621	6.33049	0.786424	6.33396
ILMN_1660970	ADAMTS12	6.19582	6.20185	0.765897	6.19819
ILMN_2413732	ADAMTS13	6.85382	6.87621	0.372525	6.8626
ILMN_1787386	ADAMTS13	6.31836	6.28661	0.144187	6.30591
ILMN_2286570	ADAMTS13	5.9954	5.95896	0.0686791	5.98111
ILMN_2358134	ADAMTS14	6.62368	6.45533	0.000162173	6.55767
ILMN_1676452	ADAMTS14	6.29105	6.25496	0.0571014	6.2769
ILMN_1683781	ADAMTS15	6.67448	6.65648	0.37419	6.66743
ILMN_1726247	ADAMTS16	6.21028	6.17801	0.166224	6.19763
ILMN_1682989	ADAMTS17	6.61217	6.63207	0.232492	6.61997
ILMN_1739872	ADAMTS18	6.59636	6.60307	0.703808	6.59899
ILMN_1770152	ADAMTS18	6.20048	6.17414	0.155222	6.19016
ILMN_1656171	ADAMTS19	6.27729	6.27551	0.918251	6.27659
ILMN_1796628	ADAMTS2	6.66191	6.68177	0.592732	6.66969
ILMN_1811765	ADAMTS2	6.53204	6.57879	0.418459	6.55037
ILMN_1791795	ADAMTS20	6.50186	6.51108	0.685117	6.50547
ILMN_1651717	ADAMTS20	6.44095	6.45143	0.636833	6.44506
ILMN_1787908	ADAMTS20	6.31947	6.31165	0.712437	6.3164
ILMN_1703803	ADAMTS3	6.33373	6.34419	0.723105	6.33783
ILMN_2092933	ADAMTS4	6.25331	6.21667	0.262754	6.23894
ILMN_1681886	ADAMTS5	6.3203	6.29305	0.236813	6.30962
ILMN_1767362	ADAMTS6	6.79757	6.82482	0.382717	6.80825
ILMN_3251322	ADAMTS7	6.55626	6.55742	0.948649	6.55671
ILMN_3274405	ADAMTS7	6.49489	6.53581	0.0256673	6.51094
ILMN_2211790	ADAMTS7	6.41451	6.40017	0.539553	6.40889
ILMN_1772239	ADAMTS7	6.37874	6.33053	0.0540693	6.35984
ILMN_1672403	ADAMTS8	6.67963	6.68217	0.919397	6.68063
ILMN_1805543	ADAMTS9	6.20831	6.19366	0.463657	6.20256
ILMN_1727084	ADAMTSL1	6.64897	6.655	0.712067	6.65134
ILMN_1684919	ADAMTSL1	6.38384	6.41365	0.171072	6.39553
ILMN_1705250	ADAMTSL1	6.33491	6.2991	0.0547198	6.32087
ILMN_1706992	ADAMTSL1	6.34159	6.28347	0.0098499	6.3188
ILMN_1722621	ADAMTSL1	6.13151	6.14089	0.590834	6.13519
ILMN_1721495	ADAMTSL2	6.61108	6.36488	1.26091e-06	6.51455
ILMN_1798690	ADAMTSL3	6.56343	6.5771	0.552277	6.56879
ILMN_1687035	ADAMTSL4	7.61178	7.6758	0.390684	7.63688
ILMN_1762294	ADAMTSL4	7.02174	7.03551	0.870365	7.02714
ILMN_1777683	ADAMTSL4	6.7246	6.66368	0.145764	6.70071
ILMN_1705904	ADAMTSL4-AS1	6.40752	6.45722	0.0285553	6.42701
ILMN_1793040	ADAMTSL5	6.71083	6.64529	0.00724347	6.68513
ILMN_2047511	ADAP1	10.2187	10.662	0.00542628	10.3925
ILMN_3247424	ADAP1	7.39342	7.68893	0.00368087	7.50928
ILMN_1763000	ADAP2	7.79547	8.67951	6.82164e-06	8.14208
ILMN_1776777	ADAR	11.4424	11.4289	0.788303	11.4371
ILMN_2320964	ADAR	9.62073	9.71627	0.118184	9.65819
ILMN_1679797	ADARB1	9.53569	9.44559	0.327097	9.50037
ILMN_2319326	ADARB1	7.52752	7.43481	0.196798	7.49117
ILMN_1697628	ADARB1	6.65774	6.62343	0.239621	6.64429
ILMN_1657442	ADARB1	6.13196	6.23142	5.31947e-07	6.17096
ILMN_1749493	ADARB2	6.66657	6.55565	0.00196978	6.62308
ILMN_1712854	ADARB2-AS1	6.55286	6.58437	0.111254	6.56521
ILMN_1657139	ADAT1	8.55696	8.48043	0.0985754	8.52696
ILMN_3245693	ADAT2	6.98326	6.91772	0.0476847	6.95756
ILMN_1786688	ADAT2	6.60873	6.41806	3.59178e-07	6.53397
ILMN_1806275	ADAT3	7.11719	7.12023	0.929429	7.11838
ILMN_1698777	ADCK1	7.83973	7.85724	0.70109	7.8466
ILMN_1663132	ADCK2	8.87564	8.91591	0.60879	8.89143
ILMN_1761309	ADCK5	7.39191	7.39611	0.949096	7.39356
ILMN_2120555	ADCY1	6.56901	6.56451	0.854106	6.56725
ILMN_1742073	ADCY1	6.33121	6.34227	0.577413	6.33555
ILMN_1808797	ADCY10	6.67637	6.71674	0.101532	6.6922
ILMN_3241894	ADCY10	6.46064	6.47064	0.583499	6.46456
ILMN_3211472	ADCY10P1	6.96867	7.0903	0.000523207	7.01636
ILMN_1658109	ADCY10P1	6.5655	6.57482	0.607406	6.56915
ILMN_1745957	ADCY10P1	6.51454	6.56931	0.0162361	6.53602
ILMN_3275137	ADCY10P1	6.53119	6.50269	0.221743	6.52002
ILMN_1810691	ADCY2	6.58012	6.59089	0.628473	6.58435
ILMN_1676893	ADCY3	9.91845	9.6035	0.0109115	9.79497
ILMN_2148944	ADCY4	7.55941	7.44926	0.282731	7.51622
ILMN_1708588	ADCY5	6.60754	6.64345	0.128883	6.62162
ILMN_1685156	ADCY6	8.25485	7.5565	1.43047e-08	7.98104
ILMN_2311674	ADCY6	7.48691	6.98378	1.76073e-08	7.28965
ILMN_1655935	ADCY7	8.92574	8.95587	0.729988	8.93755
ILMN_1754440	ADCY8	6.66633	6.6799	0.414525	6.67165
ILMN_1654287	ADCY9	6.67971	6.76412	0.318485	6.71281
ILMN_1763344	ADCYAP1	6.15037	6.18394	0.379059	6.16353
ILMN_1711736	ADCYAP1R1	6.2565	6.24326	0.442472	6.25131
ILMN_1759252	ADD1	11.9021	12.0106	0.0571597	11.9447
ILMN_2356786	ADD1	8.26994	8.40198	0.0239488	8.32171
ILMN_1694133	ADD2	6.72656	6.87074	0.000155476	6.78309
ILMN_2336146	ADD2	6.30053	6.47557	6.72482e-05	6.36916
ILMN_2286339	ADD2	6.20593	6.42094	0.000213272	6.29023
ILMN_1814526	ADD3	9.96492	10.4094	3.88333e-06	10.1392
ILMN_1787378	ADD3	8.83949	9.1658	0.000472655	8.96743
ILMN_2311278	ADD3	8.43953	8.86663	1.01072e-05	8.60699
ILMN_1678501	ADD3	6.2052	6.20574	0.978906	6.20541
ILMN_1666316	ADGB	6.72899	6.77555	0.0556195	6.74725
ILMN_1733541	ADGRA1	6.50558	6.53386	0.196022	6.51667
ILMN_1773059	ADGRA2	7.18142	7.01904	0.158164	7.11776
ILMN_1787648	ADGRA3	7.53335	7.31625	0.00549901	7.44823
ILMN_1722316	ADGRA3	6.842	6.86746	0.197211	6.85198
ILMN_1674181	ADGRA3	6.59047	6.5613	0.183236	6.57903
ILMN_1729529	ADGRB1	6.87725	6.79078	0.0456244	6.84335
ILMN_1763869	ADGRB1	6.51238	6.51395	0.935614	6.513
ILMN_1797130	ADGRB1	6.38542	6.30016	0.000392414	6.35199
ILMN_1773109	ADGRB2	6.11931	6.14917	0.12848	6.13102
ILMN_1671076	ADGRB3	6.46147	6.57063	0.000607295	6.50427
ILMN_1682487	ADGRD1	6.4203	6.41622	0.835864	6.4187
ILMN_1780601	ADGRE1	7.82498	7.97086	0.322807	7.88218
ILMN_2353633	ADGRE2	10.5608	10.0978	0.000181184	10.3792
ILMN_1676718	ADGRE2	7.54171	7.48575	0.435443	7.51977
ILMN_1755873	ADGRE3	6.48948	6.62021	0.0362936	6.54074
ILMN_2348487	ADGRE3	6.38978	6.70651	0.000867227	6.51396
ILMN_3243190	ADGRE4P	6.84925	7.00116	0.0563467	6.90881
ILMN_1736036	ADGRE4P	6.71612	6.79433	0.132217	6.74679
ILMN_2411998	ADGRE4P	6.70132	6.80255	0.00660815	6.74101
ILMN_1685010	ADGRE4P	6.68889	6.76116	0.0911699	6.71722
ILMN_2296860	ADGRE4P	6.22155	6.25547	0.377189	6.23485
ILMN_1673363	ADGRE5	12.7127	12.5943	0.322055	12.6663
ILMN_2413508	ADGRE5	9.70726	9.59938	0.393435	9.66496
ILMN_1744299	ADGRF1	6.68919	6.69908	0.598786	6.69307
ILMN_1672559	ADGRF1	6.48832	6.47158	0.463388	6.48175
ILMN_1787932	ADGRF1	6.41581	6.39894	0.504249	6.4092
ILMN_2241124	ADGRF1	6.30491	6.29795	0.771633	6.30218
ILMN_1715390	ADGRF2	6.22269	6.24448	0.241097	6.23123
ILMN_1762897	ADGRF3	6.68412	6.65184	0.157235	6.67146
ILMN_1684653	ADGRF4	6.11377	6.09815	0.376515	6.10765
ILMN_1728785	ADGRF5	6.40126	6.37741	0.279602	6.39191
ILMN_2352097	ADGRG1	10.8541	9.82756	4.32305e-05	10.4516
ILMN_2384122	ADGRG1	10.8119	9.74468	4.30184e-05	10.3935
ILMN_1697228	ADGRG1	6.28196	6.29385	0.617299	6.28662
ILMN_1751885	ADGRG2	6.61504	6.5903	0.135495	6.60534
ILMN_2349071	ADGRG2	6.29345	6.28816	0.796575	6.29138
ILMN_1765941	ADGRG3	7.152	7.1405	0.865525	7.14749
ILMN_1815054	ADGRG3	6.89287	6.89786	0.932554	6.89483
ILMN_1798977	ADGRG3	6.70162	6.62197	0.277077	6.67039
ILMN_1705587	ADGRG3	6.56506	6.57968	0.399275	6.57079
ILMN_1782230	ADGRG3	6.39453	6.46663	0.00186315	6.4228
ILMN_2115534	ADGRG4	6.67547	6.67462	0.969242	6.67513
ILMN_1666902	ADGRG5	9.80629	9.11861	3.91037e-06	9.53667
ILMN_1674256	ADGRG5	6.37637	6.37359	0.910388	6.37528
ILMN_2367010	ADGRG6	6.84562	6.66616	0.0236542	6.77526
ILMN_2125395	ADGRG7	6.61723	6.58911	0.0793898	6.60621
ILMN_1808078	ADGRG7	6.59174	6.62112	0.130237	6.60326
ILMN_1813175	ADGRL1	7.06384	6.91211	0.0702626	7.00435
ILMN_1800894	ADGRL1	6.77589	6.72759	0.0449433	6.75695
ILMN_2342630	ADGRL1	6.48102	6.45639	0.263159	6.47136
ILMN_1665970	ADGRL2	6.6616	6.68146	0.426299	6.66939
ILMN_1697548	ADGRL2	6.48772	6.43345	0.351031	6.46645
ILMN_1692623	ADGRL3	6.48647	6.48229	0.875246	6.48483
ILMN_1711807	ADGRL3	6.34399	6.29704	0.138638	6.32558
ILMN_3240520	ADGRL4	6.45854	6.47945	0.24765	6.46674
ILMN_1690621	ADGRV1	6.41109	6.38226	0.33821	6.39979
ILMN_2407564	ADGRV1	6.11937	6.11809	0.951323	6.11887
ILMN_1764309	ADH1A	6.62211	6.61337	0.627184	6.61868
ILMN_1811598	ADH1B	6.40875	6.42559	0.33218	6.41535
ILMN_1740717	ADH1C	6.54956	6.56749	0.38645	6.55659
ILMN_1797912	ADH4	6.37989	6.39917	0.252194	6.38745
ILMN_2136010	ADH4	6.25037	6.24916	0.950159	6.2499
ILMN_1738604	ADH5	7.13942	7.0173	3.06536e-05	7.09154
ILMN_1691175	ADH6	6.53247	6.49288	0.119165	6.51695
ILMN_2223359	ADH7	6.60003	6.60578	0.767073	6.60228
ILMN_1702858	ADHFE1	9.08762	8.66465	5.05142e-06	8.92178
ILMN_1767658	ADHFE1	8.64327	8.41356	0.00137233	8.5532
ILMN_2363634	ADHFE1	7.92654	7.59169	1.41291e-06	7.79526
ILMN_1813975	ADI1	6.89622	6.83576	0.137025	6.87252
ILMN_1743331	ADIG	6.15309	6.15697	0.831367	6.15461
ILMN_1775045	ADIPOQ	6.72127	6.82668	0.000288919	6.7626
ILMN_1688322	ADIPOR1	9.26902	9.90105	3.05984e-08	9.51682
ILMN_2096322	ADIPOR1	8.56742	9.18053	2.23243e-07	8.8078
ILMN_2224833	ADIPOR2	9.49699	9.55049	0.300187	9.51797
ILMN_1680110	ADIRF	6.54107	6.50181	0.0804059	6.52568
ILMN_2358626	ADK	9.75762	9.58816	0.0142013	9.69118
ILMN_1801020	ADK	7.72452	7.64624	0.171645	7.69383
ILMN_1768062	ADK	7.00787	6.81743	0.000992262	6.9332
ILMN_2358628	ADK	6.41287	6.44085	0.145661	6.42384
ILMN_1708934	ADM	8.33003	9.51597	5.84536e-08	8.795
ILMN_1702933	ADM2	6.76224	6.77336	0.698924	6.7666
ILMN_1657993	ADNP	8.82897	8.63303	0.000388021	8.75215
ILMN_1666019	ADNP	7.38992	7.33026	0.177593	7.36653
ILMN_2080751	ADNP2	8.4211	8.4304	0.845699	8.42475
ILMN_1690352	ADO	8.93806	8.72872	2.48371e-05	8.85598
ILMN_1747227	ADORA1	7.12248	7.39823	0.00169081	7.23059
ILMN_2373444	ADORA1	6.20289	6.18845	0.470639	6.19723
ILMN_2275396	ADORA1	6.15888	6.15917	0.987262	6.15899
ILMN_1807372	ADORA2A	7.39655	7.62523	0.00219641	7.48621
ILMN_1668353	ADORA2A-AS1	6.66842	6.69092	0.207493	6.67724
ILMN_1703946	ADORA2B	7.3883	7.59917	0.0267575	7.47098
ILMN_1730710	ADORA3	6.68843	6.73789	0.225043	6.70782
ILMN_1793959	ADPGK	9.56295	9.55807	0.9245	9.56104
ILMN_1794512	ADPRH	7.5588	7.49841	0.387241	7.53513
ILMN_1788530	ADPRHL1	6.75767	6.83384	0.00357515	6.78753
ILMN_1776842	ADPRHL1	6.47919	6.41914	0.0159643	6.45565
ILMN_1760335	ADPRHL1	6.44246	6.44731	0.898153	6.44436
ILMN_1795788	ADPRHL1	6.26385	6.26527	0.93215	6.26441
ILMN_1811480	ADPRHL2	9.09117	8.99501	0.024003	9.05347
ILMN_1702526	ADPRM	8.51348	7.9943	3.01442e-10	8.30993
ILMN_1780551	ADRA1A	6.56207	6.58773	0.191949	6.57213
ILMN_1709167	ADRA1A	6.55668	6.52389	0.101537	6.54382
ILMN_1669227	ADRA1A	6.32309	6.27896	0.0357324	6.30579
ILMN_1653821	ADRA1A	6.26888	6.25634	0.467624	6.26397
ILMN_1813598	ADRA1A	6.13044	6.14797	0.400478	6.13731
ILMN_1716421	ADRA1D	6.24386	6.24027	0.893052	6.24245
ILMN_1659371	ADRA2A	6.98675	7.04205	0.322355	7.00843
ILMN_1677868	ADRA2B	6.91827	6.94154	0.356194	6.92739
ILMN_1733963	ADRA2C	6.54491	6.65236	0.0228209	6.58704
ILMN_1804255	ADRB1	6.64849	6.62728	0.430957	6.64018
ILMN_1695590	ADRB2	8.85402	9.18511	0.0308694	8.98383
ILMN_1694007	ADRB3	6.57153	6.59383	0.213093	6.58027
ILMN_1760143	ADRM1	10.1532	10.3073	0.00059747	10.2136
ILMN_2389013	ADRM1	8.55569	8.69549	0.00461006	8.6105
ILMN_1790757	ADSL	11.4356	11.1482	1.92811e-06	11.3229
ILMN_2092664	ADSS	10.1646	10.0738	0.079072	10.129
ILMN_1778796	ADSS	7.94836	7.95917	0.879777	7.9526
ILMN_1720235	ADSSL1	6.90595	6.94087	0.599253	6.91964
ILMN_2240009	ADSSL1	6.68138	6.70735	0.26799	6.69157
ILMN_1749804	ADSSL1	6.57885	6.6051	0.147451	6.58914
ILMN_2078592	ADTRP	6.18169	6.22642	0.069829	6.19923
ILMN_1736178	AEBP1	7.97514	7.46726	0.000162047	7.77602
ILMN_1803376	AEBP2	7.80378	7.81501	0.764236	7.80819
ILMN_1814282	AEN	8.35023	8.64535	0.000119965	8.46594
ILMN_3240321	AEN	7.62909	7.75191	0.0209358	7.67724
ILMN_1712944	AES	11.1832	11.1917	0.898464	11.1865
ILMN_2333107	AES	9.39054	9.39572	0.94059	9.39257
ILMN_1707958	AES	6.39494	6.40436	0.741417	6.39863
ILMN_1701998	AFAP1	6.53998	6.65165	0.000621342	6.58376
ILMN_1651235	AFAP1	6.48311	6.49021	0.817332	6.48589
ILMN_1660424	AFAP1	6.32284	6.32487	0.915455	6.32363
ILMN_3224987	AFAP1-AS1	6.61446	6.67597	0.00335346	6.63858
ILMN_1694140	AFAP1L1	6.87894	6.70969	0.00210709	6.81258
ILMN_1730995	AFAP1L2	7.30221	6.9181	0.000170801	7.15161
ILMN_2404917	AFAP1L2	6.70847	6.46545	0.000552083	6.61319
ILMN_1654915	AFDN	6.95437	7.24898	3.43333e-05	7.06988
ILMN_1716655	AFDN	6.52486	6.54235	0.440599	6.53171
ILMN_1746277	AFDN	6.53831	6.49316	0.00850375	6.52061
ILMN_1651310	AFDN	6.45443	6.42855	0.122486	6.44429
ILMN_3244192	AFDN-AS1	15.1435	15.1819	0.122588	15.1585
ILMN_3242186	AFDN-AS1	6.46916	6.44421	0.332574	6.45938
ILMN_1691374	AFDN-AS1	6.31167	6.32128	0.597885	6.31544
ILMN_2129015	AFF1	8.38634	8.22492	0.0506088	8.32305
ILMN_1673119	AFF1	6.83203	6.7964	0.418037	6.81806
ILMN_3225075	AFF1-AS1	6.50184	6.51684	0.567703	6.50772
ILMN_1725889	AFF2	6.4243	6.45136	0.407288	6.43491
ILMN_1775235	AFF3	7.43183	7.36955	0.616986	7.40741
ILMN_1697308	AFF3	7.35366	7.28632	0.413255	7.32726
ILMN_1677951	AFF3	6.44052	6.43748	0.919472	6.43933
ILMN_1708502	AFF4	7.96532	7.90881	0.395216	7.94316
ILMN_2203987	AFG1L	6.41294	6.38654	0.214595	6.40259
ILMN_1705447	AFG3L1P	8.27357	8.35081	0.193259	8.30386
ILMN_1699172	AFG3L1P	6.79176	6.80709	0.675751	6.79777
ILMN_2409898	AFG3L1P	6.74885	6.75956	0.615834	6.75305
ILMN_2295698	AFG3L1P	6.67984	6.70699	0.268925	6.69048
ILMN_2066124	AFG3L2	10.0713	9.9509	0.0184876	10.0241
ILMN_1777797	AFM	6.2516	6.24969	0.927952	6.25085
ILMN_1707551	AFMID	7.87941	7.66996	0.00267217	7.79729
ILMN_2095653	AFMID	7.2438	7.35132	0.356616	7.28596
ILMN_1782204	AFP	6.46151	6.50361	0.0161093	6.47802
ILMN_2402766	AFTPH	9.50609	9.52886	0.721501	9.51502
ILMN_2342841	AFTPH	8.13207	8.20144	0.227897	8.15927
ILMN_1767722	AFTPH	7.72385	7.5578	0.00237539	7.65875
ILMN_1802631	AGA	8.23694	8.17899	0.259207	8.21422
ILMN_1800530	AGAP1	6.85799	7.05773	0.0128408	6.9363
ILMN_2245223	AGAP1	6.51961	6.53712	0.354191	6.52648
ILMN_2318481	AGAP1	6.24258	6.26665	0.253241	6.25202
ILMN_1804337	AGAP12P	6.752	6.79911	0.0634329	6.77047
ILMN_1735591	AGAP2	6.7002	6.60057	0.00012565	6.66114
ILMN_3273340	AGAP2-AS1	6.72049	6.69319	0.320416	6.70979
ILMN_1795918	AGAP3	7.71776	7.64487	0.413403	7.68918
ILMN_2269136	AGAP3	6.86263	6.91834	0.0755802	6.88447
ILMN_2362126	AGAP3	6.48656	6.48696	0.985584	6.48672
ILMN_2189007	AGAP4	7.13758	7.03424	0.0693608	7.09707
ILMN_2209578	AGAP6	10.3997	10.2788	0.0810531	10.3523
ILMN_3239130	AGAP6	8.72504	8.54404	0.0107617	8.65407
ILMN_1734553	AGAP6	7.61154	7.55785	0.394098	7.59049
ILMN_1667263	AGAP9	6.62297	6.63612	0.487302	6.62812
ILMN_1657603	AGBL1	6.59371	6.61566	0.340326	6.60232
ILMN_2100055	AGBL1	6.26586	6.22543	0.0378192	6.25001
ILMN_1688627	AGBL2	6.68659	6.71679	0.158099	6.69843
ILMN_1672767	AGBL3	6.40487	6.39863	0.742654	6.40242
ILMN_2196642	AGBL4	6.40615	6.40916	0.895605	6.40733
ILMN_2308689	AGBL5	8.80743	8.42045	2.45983e-06	8.6557
ILMN_2290776	AGBL5	7.40181	7.19501	5.02e-05	7.32073
ILMN_1778510	AGBL5	6.55288	6.54201	0.580542	6.54862
ILMN_2257015	AGER	7.33084	7.33891	0.82757	7.334
ILMN_1729777	AGER	6.70654	6.69058	0.460069	6.70028
ILMN_1690829	AGER	6.55211	6.54163	0.615096	6.548
ILMN_1792497	AGFG1	8.01951	8.43318	2.91931e-09	8.1817
ILMN_3260345	AGFG1	7.43537	7.70848	4.75983e-05	7.54245
ILMN_3181215	AGFG1	6.81788	6.98845	3.47079e-05	6.88476
ILMN_2196734	AGFG1	6.79419	6.93497	0.000168142	6.84939
ILMN_1725361	AGFG1	6.4145	6.43253	0.3617	6.42157
ILMN_1703228	AGFG2	7.02047	6.9569	0.070248	6.99554
ILMN_1652023	AGFG2	6.78436	6.86784	0.00220522	6.81709
ILMN_2064917	AGGF1	9.24528	9.10591	0.000352815	9.19064
ILMN_1776153	AGGF1	7.49049	7.44982	0.134974	7.47454
ILMN_1772645	AGK	8.42006	8.30924	0.037854	8.37661
ILMN_2371825	AGL	8.78886	8.70215	0.174611	8.75486
ILMN_1664006	AGL	7.43206	7.34256	0.00489088	7.39697
ILMN_1680343	AGL	6.65588	6.65833	0.878268	6.65685
ILMN_1717468	AGL	6.54756	6.52355	0.258262	6.53815
ILMN_2274377	AGL	6.34581	6.36545	0.282212	6.35351
ILMN_2277492	AGL	6.22125	6.23616	0.400342	6.22709
ILMN_1707169	AGMAT	6.65072	6.6419	0.821294	6.64726
ILMN_1812678	AGMO	6.62915	6.6681	0.0267892	6.64442
ILMN_1671326	AGO1	8.18113	8.14616	0.484198	8.16742
ILMN_1695719	AGO2	9.66251	9.76882	0.191209	9.70419
ILMN_1761049	AGO3	7.20905	7.11386	0.0357929	7.17173
ILMN_1809751	AGO3	6.82861	6.82971	0.970159	6.82904
ILMN_1706304	AGO4	7.25629	7.24923	0.909646	7.25352
ILMN_1697790	AGPAT1	6.4723	6.48895	0.33915	6.47883
ILMN_1779109	AGPAT1	6.02945	6.03902	0.582393	6.0332
ILMN_2377430	AGPAT2	8.84312	8.74979	0.235188	8.80653
ILMN_1732176	AGPAT2	8.61095	8.49793	0.063577	8.56664
ILMN_1681081	AGPAT2	8.61954	8.42771	0.00512263	8.54433
ILMN_1654010	AGPAT3	6.85316	7.01846	0.00150388	6.91797
ILMN_1789957	AGPAT3	6.6495	6.6776	0.149221	6.66052
ILMN_1661373	AGPAT3	6.38061	6.38763	0.836909	6.38337
ILMN_2288175	AGPAT3	6.35041	6.40419	0.0811634	6.3715
ILMN_1730504	AGPAT4	8.3454	8.14042	0.0208284	8.26503
ILMN_1732672	AGPAT4	6.67518	6.66507	0.715348	6.67122
ILMN_1655572	AGPAT4-IT1	7.55839	7.37114	0.0152349	7.48497
ILMN_3241996	AGPAT4-IT1	7.29301	7.1805	0.0551429	7.2489
ILMN_1662049	AGPAT5	8.10018	7.66198	4.41705e-06	7.92837
ILMN_1698209	AGPS	8.65983	8.56619	0.243873	8.62312
ILMN_3307841	AGR2	6.79259	6.55798	0.0438299	6.70061
ILMN_1814151	AGR2	6.44252	6.39093	0.42053	6.42229
ILMN_1728787	AGR3	6.80275	6.81271	0.743648	6.80665
ILMN_2050246	AGR3	6.42314	6.41483	0.675776	6.41988
ILMN_1770454	AGRN	7.52762	7.67757	0.00514338	7.58641
ILMN_1652758	AGRN	6.614	6.62149	0.744245	6.61694
ILMN_2234605	AGRN	6.47123	6.46742	0.844728	6.46974
ILMN_1714253	AGRP	6.73842	6.83079	0.273494	6.77464
ILMN_1770336	AGRP	6.54679	6.5329	0.495147	6.54134
ILMN_1813530	AGT	6.53998	6.4575	0.0818494	6.50764
ILMN_1718071	AGTPBP1	9.00887	9.62697	2.80396e-08	9.25121
ILMN_1814327	AGTR1	6.65357	6.75788	0.00290638	6.69447
ILMN_2341343	AGTR1	6.63774	6.68645	0.0470571	6.65684
ILMN_1775634	AGTR2	6.49139	6.44487	0.0468478	6.47315
ILMN_2307656	AGTRAP	7.9664	8.54179	0.000129206	8.19199
ILMN_1802458	AGTRAP	7.88492	8.44116	8.25897e-05	8.103
ILMN_1709796	AGXT	7.29662	6.78213	3.77344e-05	7.0949
ILMN_1783963	AGXT2	6.27594	6.28741	0.555795	6.28044
ILMN_1809139	AHCTF1	8.20956	8.25359	0.399483	8.22682
ILMN_1747504	AHCTF1	8.09131	8.12549	0.499734	8.10471
ILMN_1666679	AHCTF1	6.46062	6.45408	0.710791	6.45806
ILMN_1657862	AHCY	10.9053	10.419	4.28322e-07	10.7146
ILMN_1770412	AHCYL1	10.273	10.0337	4.23446e-07	10.1792
ILMN_1712786	AHCYL2	7.62876	7.44159	0.000351868	7.55538
ILMN_1680111	AHDC1	7.48825	7.25482	0.000181543	7.39673
ILMN_1791006	AHI1	7.671	7.33562	5.78744e-05	7.53951
ILMN_1714567	AHNAK	11.8024	11.941	0.195999	11.8567
ILMN_1752159	AHNAK	7.57449	7.71458	0.119692	7.62941
ILMN_1792495	AHNAK	7.32245	7.46884	0.104737	7.37984
ILMN_1790688	AHNAK2	6.63026	6.63824	0.702018	6.63339
ILMN_1657111	AHNAK2	6.52104	6.5231	0.927282	6.52185
ILMN_3243156	AHNAK2	6.33413	6.32277	0.603699	6.32967
ILMN_1750352	AHNAK2	6.31724	6.30778	0.642652	6.31353
ILMN_2162799	AHR	7.72071	7.7295	0.92025	7.72416
ILMN_1782679	AHRR	6.35357	6.32109	0.172272	6.34083
ILMN_1703617	AHSA1	9.67998	9.56995	0.0663029	9.63684
ILMN_1798308	AHSA2	9.74618	9.81183	0.358772	9.77192
ILMN_1730625	AHSG	6.19576	6.17269	0.226913	6.18672
ILMN_1696512	AHSP	7.53185	9.37625	9.66717e-09	8.25499
ILMN_2164164	AICDA	6.67587	6.67492	0.966692	6.6755
ILMN_3240117	AIDA	9.95923	10.2676	0.000342209	10.0801
ILMN_1659752	AIDA	6.96307	7.18977	0.00176714	7.05195
ILMN_1732278	AIDA	6.83336	7.05577	0.000164678	6.92056
ILMN_1654129	AIDA	6.79655	6.86911	0.00719144	6.825
ILMN_1656746	AIDA	6.40096	6.42182	0.279078	6.40914
ILMN_1792473	AIF1	12.7315	12.4466	0.0078883	12.6198
ILMN_1703538	AIF1	10.9553	11.1702	0.268757	11.0395
ILMN_1771827	AIF1	6.6561	6.66963	0.554837	6.66141
ILMN_3246401	AIF1L	9.52023	8.27363	2.29498e-07	9.03147
ILMN_1770725	AIF1L	7.50936	6.81736	5.4868e-08	7.23805
ILMN_2323508	AIF1L	7.14307	6.50664	2.43949e-07	6.89355
ILMN_2313821	AIFM1	9.23131	9.18819	0.301271	9.2144
ILMN_1668408	AIFM1	7.9258	7.83861	0.0210734	7.89162
ILMN_1717357	AIFM1	7.28173	7.32237	0.287808	7.29766
ILMN_1667183	AIFM1	6.78615	6.65403	0.000286387	6.73435
ILMN_1712639	AIFM2	6.59834	6.55668	0.219025	6.58201
ILMN_1704173	AIFM3	6.96202	6.92152	0.353808	6.94614
ILMN_1797974	AIG1	7.5716	7.53534	0.627493	7.55739
ILMN_1681301	AIM2	7.32559	8.43275	1.27463e-11	7.75968
ILMN_2214232	AIM2	6.4077	6.41611	0.722603	6.411
ILMN_1715351	AIMP1	6.34853	6.36173	0.541264	6.35371
ILMN_1673252	AIMP2	10.4216	10.0724	3.0151e-07	10.2847
ILMN_2103841	AIP	9.83737	9.94307	0.0476018	9.87881
ILMN_2368268	AIPL1	6.50399	6.44113	0.00359687	6.47934
ILMN_2415292	AIPL1	6.37871	6.34859	0.146378	6.3669
ILMN_2261519	AIRE	12.7605	12.9005	0.0462126	12.8154
ILMN_1791236	AIRE	6.53298	6.54649	0.459627	6.53828
ILMN_1670282	AIRE	6.22095	6.25164	0.221347	6.23298
ILMN_2312764	AJAP1	6.87648	6.87521	0.967979	6.87598
ILMN_2242299	AJAP1	6.43653	6.43487	0.946542	6.43588
ILMN_1723521	AJAP1	6.20625	6.22341	0.480737	6.21298
ILMN_1687275	AJUBA	6.79096	6.80404	0.521571	6.79609
ILMN_1661372	AJUBA	6.53954	6.54593	0.758283	6.54205
ILMN_1811535	AJUBA	6.21475	6.2251	0.56258	6.21881
ILMN_1716053	AK2	10.5147	10.1668	6.73134e-05	10.3783
ILMN_1670542	AK2	9.82265	9.55919	0.00240696	9.71936
ILMN_1655645	AK2	8.26467	7.94344	9.57881e-07	8.13872
ILMN_1778173	AK3	10.376	9.95145	4.80887e-07	10.2096
ILMN_2338038	AK4	7.33948	7.36886	0.746442	7.351
ILMN_1764090	AK4	7.23003	7.29465	0.292216	7.25537
ILMN_1777499	AK4	7.28432	7.02808	0.000151617	7.18386
ILMN_1798249	AK4	6.88873	6.88647	0.958008	6.88784
ILMN_1686522	AK4	6.53312	6.56587	0.119071	6.54596
ILMN_2387712	AK5	6.79544	6.78125	0.779691	6.78988
ILMN_1656593	AK5	6.48589	6.47386	0.687775	6.48118
ILMN_2283473	AK5	6.19023	6.19796	0.683389	6.19326
ILMN_1778617	AK6	7.4355	7.3052	0.0137356	7.38441
ILMN_2343332	AK6	7.2734	7.16184	0.0509669	7.22966
ILMN_1684305	AK7	6.31838	6.34281	0.274619	6.32796
ILMN_1659914	AK8	6.67878	6.74663	0.0226856	6.70538
ILMN_1687835	AK9	6.90758	6.79017	0.000222128	6.86155
ILMN_1755111	AK9	6.51142	6.50147	0.600502	6.50752
ILMN_1747084	AK9	6.51957	6.45346	0.00526409	6.49365
ILMN_1662143	AKAIN1	6.57619	6.57424	0.920052	6.57543
ILMN_1676613	AKAIN1	6.43782	6.45777	0.290172	6.44564
ILMN_1712530	AKAP1	6.87917	6.79037	0.0160289	6.84435
ILMN_1662598	AKAP1	6.34558	6.32323	0.181414	6.33682
ILMN_1718808	AKAP10	7.44106	7.51818	0.105986	7.4713
ILMN_2293758	AKAP11	8.69109	8.56295	0.0720659	8.64085
ILMN_1693220	AKAP11	8.14294	8.07459	0.197916	8.11614
ILMN_1783818	AKAP11	6.7107	6.64254	0.007903	6.68398
ILMN_1684836	AKAP12	6.70279	6.68263	0.443346	6.69489
ILMN_1686846	AKAP12	6.53816	6.51819	0.388083	6.53033
ILMN_1715532	AKAP12	6.51707	6.55071	0.116331	6.53026
ILMN_2308950	AKAP12	6.42891	6.45858	0.199427	6.44054
ILMN_2396956	AKAP13	10.1875	10.3649	0.0118501	10.257
ILMN_1752247	AKAP13	8.26501	8.51091	0.00672012	8.36142
ILMN_1709101	AKAP13	8.1795	8.37483	0.00243209	8.25609
ILMN_1679987	AKAP14	6.40493	6.41436	0.675575	6.40863
ILMN_1802537	AKAP14	6.40728	6.40164	0.773463	6.40507
ILMN_1673542	AKAP14	6.15955	6.1925	0.0915614	6.17247
ILMN_2117716	AKAP17A	11.0457	10.8943	0.00475285	10.9864
ILMN_1807737	AKAP17A	9.48429	9.40583	0.106173	9.45353
ILMN_1737754	AKAP2	6.54508	6.62183	0.00403808	6.57517
ILMN_1808905	AKAP3	6.33446	6.30388	0.179379	6.32247
ILMN_2268556	AKAP4	6.55038	6.589	0.023402	6.56552
ILMN_2253207	AKAP4	6.55792	6.54449	0.51996	6.55265
ILMN_1734794	AKAP4	6.27097	6.25141	0.319388	6.2633
ILMN_1690818	AKAP5	6.45375	6.46082	0.70431	6.45652
ILMN_1770758	AKAP6	6.31874	6.31067	0.635612	6.31558
ILMN_1733690	AKAP7	8.79342	8.84486	0.520937	8.81359
ILMN_1703049	AKAP7	6.4884	6.46317	0.405529	6.47851
ILMN_2410406	AKAP7	6.2876	6.29137	0.909095	6.28908
ILMN_2293529	AKAP7	6.14278	6.1497	0.718205	6.14549
ILMN_1741572	AKAP8	8.96323	8.89102	0.0582714	8.93492
ILMN_1768962	AKAP8L	8.32232	8.39464	0.392726	8.35067
ILMN_2396691	AKAP9	6.33207	6.31668	0.58713	6.32604
ILMN_2400663	AKAP9	6.21509	6.19684	0.420902	6.20793
ILMN_1752988	AKIP1	9.21657	9.07372	0.0119829	9.16056
ILMN_1788356	AKIP1	8.09632	7.91184	0.00593274	8.02399
ILMN_2359029	AKIP1	7.79913	7.70153	0.0151256	7.76087
ILMN_2267365	AKIP1	6.53796	6.59685	0.00875499	6.56105
ILMN_1665660	AKIP1	6.585	6.48409	0.00130953	6.54544
ILMN_1802799	AKIRIN1	9.21459	9.25973	0.334148	9.23229
ILMN_1658337	AKIRIN1	8.23661	8.3852	0.0836119	8.29487
ILMN_1679383	AKIRIN1	6.52006	6.56502	0.270685	6.53769
ILMN_2148847	AKIRIN2	9.93784	10.1495	0.00259493	10.0208
ILMN_1770673	AKNA	9.83014	10.0798	0.00764277	9.92804
ILMN_2205785	AKNAD1	6.6385	6.65628	0.39531	6.64547
ILMN_1695005	AKNAD1	6.31577	6.36789	0.0239793	6.3362
ILMN_2380771	AKR1A1	11.1053	10.7493	1.82932e-07	10.9657
ILMN_1728047	AKR1A1	11.1088	10.6924	1.94027e-08	10.9456
ILMN_1774938	AKR1A1	6.90501	6.88763	0.518795	6.8982
ILMN_1701731	AKR1B1	9.80653	9.74039	0.424264	9.7806
ILMN_1672148	AKR1B10	6.33143	6.35539	0.218243	6.34082
ILMN_2278335	AKR1B15	6.4726	6.48305	0.620325	6.4767
ILMN_1763999	AKR1B15	6.40151	6.43054	0.242614	6.4129
ILMN_1707690	AKR1C1	6.47267	6.47732	0.816956	6.47449
ILMN_3237488	AKR1C1	6.3588	6.3534	0.800387	6.35669
ILMN_1662507	AKR1C1	6.03407	6.0209	0.522563	6.0289
ILMN_2412336	AKR1C2	6.81065	6.77968	0.601773	6.79851
ILMN_1719154	AKR1C2	6.68377	6.72081	0.0850596	6.69829
ILMN_1668617	AKR1C2	6.58536	6.61571	0.113375	6.59726
ILMN_1773417	AKR1C2	6.43961	6.4646	0.244485	6.44941
ILMN_1730191	AKR1C2	6.32066	6.29687	0.316492	6.31133
ILMN_1713124	AKR1C3	11.0838	10.0283	2.97327e-06	10.67
ILMN_1687757	AKR1C3	8.69334	8.17825	0.000241335	8.49139
ILMN_1668880	AKR1C4	6.36719	6.35309	0.525817	6.36166
ILMN_1685803	AKR1C8P	6.61211	6.60221	0.59604	6.60822
ILMN_3307911	AKR1C8P	6.48472	6.51747	0.0842267	6.49756
ILMN_2157277	AKR1D1	13.9053	14.0309	0.0192932	13.9545
ILMN_1692661	AKR1D1	6.65692	6.6635	0.696653	6.6595
ILMN_1694985	AKR1E2	6.62149	6.6235	0.925249	6.62228
ILMN_1677043	AKR7A2	10.7872	10.515	8.2198e-05	10.6805
ILMN_2145396	AKR7A3	8.85762	8.73221	0.0232812	8.80845
ILMN_1718483	AKR7A3	6.37748	6.37272	0.818974	6.37561
ILMN_1702696	AKR7L	6.67176	6.5953	0.000269327	6.64178
ILMN_3243152	AKR7L	6.40447	6.40013	0.788746	6.40276
ILMN_2410909	AKT1	10.7566	10.6443	0.0185801	10.7126
ILMN_2388507	AKT1	10.6256	10.5068	0.0177556	10.579
ILMN_1748661	AKT1	6.57477	6.51976	0.0256925	6.5532
ILMN_1726906	AKT1S1	6.99962	7.01619	0.549997	7.00612
ILMN_1743347	AKT2	6.58399	6.56743	0.448549	6.5775
ILMN_2325612	AKT3	6.68408	6.7387	0.014408	6.7055
ILMN_2325610	AKT3	6.63475	6.74957	0.000414129	6.67977
ILMN_1757130	AKT3	6.64606	6.65488	0.645878	6.64952
ILMN_1733598	AKT3	6.52977	6.55905	0.116595	6.54125
ILMN_2377240	AKTIP	8.01419	8.16222	0.0109152	8.07223
ILMN_1665982	AKTIP	6.91959	6.95906	0.260907	6.93507
ILMN_1747577	ALAD	9.53034	9.74176	0.0357322	9.61323
ILMN_2404657	ALAD	6.60719	6.61648	0.788511	6.61083
ILMN_1679898	ALAD	6.4851	6.4976	0.582842	6.49
ILMN_2385647	ALAS1	6.90903	6.85673	0.136105	6.88853
ILMN_1700047	ALAS1	6.66307	6.53502	0.00187482	6.61287
ILMN_1728309	ALAS1	6.41953	6.40665	0.573162	6.41448
ILMN_2367126	ALAS2	7.56474	9.32757	2.61235e-08	8.2559
ILMN_1708323	ALAS2	6.43656	7.1802	1.22578e-05	6.72812
ILMN_2271875	ALAS2	6.44043	6.80636	2.33107e-05	6.5839
ILMN_1782939	ALB	7.34019	7.45263	0.019613	7.38428
ILMN_1682763	ALB	6.59673	6.5985	0.926152	6.59743
ILMN_1670870	ALCAM	9.06468	8.89723	0.157936	8.99903
ILMN_2051381	ALDH16A1	8.19123	8.18425	0.899371	8.18849
ILMN_2302716	ALDH18A1	9.15427	8.69466	3.45215e-07	8.97407
ILMN_1709348	ALDH1A1	8.61253	7.93219	0.00189931	8.34579
ILMN_2096372	ALDH1A1	7.81008	7.22338	0.00201773	7.58005
ILMN_1748538	ALDH1A2	6.84936	6.94616	0.000759769	6.88731
ILMN_2383707	ALDH1A2	6.56831	6.59706	0.105737	6.57958
ILMN_1807439	ALDH1A3	6.58457	6.57316	0.576773	6.5801
ILMN_2139970	ALDH1A3	5.97561	5.99568	0.501845	5.98347
ILMN_2150894	ALDH1B1	7.39387	7.19565	0.000122812	7.31615
ILMN_1675398	ALDH1B1	6.70979	6.66403	0.0410626	6.69185
ILMN_1802167	ALDH1L1	6.4678	6.47402	0.803088	6.47024
ILMN_1736539	ALDH1L2	6.62029	6.63066	0.647805	6.62436
ILMN_2182980	ALDH1L2	6.54751	6.56254	0.509262	6.5534
ILMN_1793859	ALDH2	8.62796	8.59682	0.853423	8.61575
ILMN_1702503	ALDH3A1	6.6027	6.54926	0.0216245	6.58175
ILMN_1794825	ALDH3A2	8.63801	8.73462	0.342051	8.67589
ILMN_2401641	ALDH3A2	7.87834	7.95202	0.295046	7.90723
ILMN_1667564	ALDH3A2	6.61777	6.57014	0.270624	6.5991
ILMN_1728662	ALDH3B1	8.8485	9.02762	0.246469	8.91873
ILMN_1727965	ALDH3B1	6.67848	6.71059	0.371248	6.69107
ILMN_1761514	ALDH3B2	6.32323	6.3135	0.599799	6.31942
ILMN_1763666	ALDH3B2	6.18968	6.17275	0.406485	6.18304
ILMN_2363880	ALDH3B2	6.17576	6.13659	0.115934	6.16041
ILMN_1656368	ALDH4A1	7.19942	7.25408	0.476559	7.22085
ILMN_1696099	ALDH4A1	7.10236	7.1921	0.0442695	7.13754
ILMN_2406557	ALDH4A1	6.86421	6.91762	0.123156	6.88515
ILMN_2244841	ALDH4A1	6.32041	6.30929	0.808718	6.31605
ILMN_2372398	ALDH5A1	8.38104	8.00006	0.000474897	8.23167
ILMN_2372403	ALDH5A1	7.28951	7.13636	0.0115	7.22947
ILMN_1785284	ALDH6A1	8.20828	8.10719	0.070156	8.16864
ILMN_2096985	ALDH6A1	6.8734	6.73771	0.00129357	6.8202
ILMN_1763461	ALDH7A1	7.684	7.38288	0.00211078	7.56594
ILMN_1687508	ALDH7A1	7.65664	7.2241	0.000171724	7.48706
ILMN_2365176	ALDH8A1	6.9749	6.95586	0.466975	6.96744
ILMN_1699258	ALDH8A1	6.62825	6.63425	0.779159	6.6306
ILMN_1681938	ALDH8A1	6.52499	6.51422	0.548437	6.52077
ILMN_1761804	ALDH9A1	11.434	11.4667	0.517472	11.4468
ILMN_1741148	ALDOA	11.8452	11.7883	0.332749	11.8229
ILMN_1736700	ALDOA	11.529	11.6122	0.488382	11.5617
ILMN_2251253	ALDOA	6.57942	6.63414	0.0823129	6.60088
ILMN_1681374	ALDOA	6.51091	6.47602	0.101555	6.49723
ILMN_1747716	ALDOB	7.13127	7.00944	0.0190282	7.0835
ILMN_1755974	ALDOC	8.40189	8.60889	0.0764463	8.48305
ILMN_1718093	ALG1	7.09698	6.99086	0.0141151	7.05537
ILMN_3243268	ALG10	6.86419	6.78934	0.00407195	6.83484
ILMN_1730304	ALG10	6.75074	6.61892	5.06165e-05	6.69906
ILMN_3251482	ALG10B	7.86718	7.57332	3.52495e-06	7.75197
ILMN_1666325	ALG10B	6.98991	6.93331	0.0722306	6.96772
ILMN_1660856	ALG11	7.45205	7.4337	0.633941	7.44485
ILMN_1743995	ALG12	7.07376	7.03242	0.050006	7.05755
ILMN_1761456	ALG13	9.11185	9.30727	0.00358962	9.18847
ILMN_1724341	ALG13	8.39958	8.12565	4.57415e-05	8.29218
ILMN_2147503	ALG13	6.74042	6.72748	0.580177	6.73535
ILMN_1743635	ALG14	7.19518	7.31914	0.00338409	7.24378
ILMN_2191822	ALG14	6.61447	6.65649	0.251645	6.63094
ILMN_1782084	ALG1L	6.62457	6.63364	0.691047	6.62813
ILMN_1672631	ALG1L2	6.47461	6.52768	0.0283667	6.49542
ILMN_1715309	ALG1L9P	6.64203	6.64443	0.913067	6.64297
ILMN_1722688	ALG2	7.05739	7.06781	0.775239	7.06148
ILMN_1737945	ALG2	6.94625	6.99333	0.0565846	6.96471
ILMN_1711886	ALG3	9.1947	9.1344	0.207951	9.17106
ILMN_1806845	ALG3	7.33565	7.28568	0.46274	7.31606
ILMN_1664449	ALG5	8.65945	8.74771	0.0775117	8.69405
ILMN_1771411	ALG6	8.65514	8.65623	0.980616	8.65557
ILMN_1685413	ALG8	9.12057	8.91891	2.57727e-05	9.0415
ILMN_2365686	ALG8	8.61182	8.3596	9.38941e-06	8.51293
ILMN_2271014	ALG8	6.70124	6.69974	0.931624	6.70065
ILMN_1732809	ALG9	8.85378	8.73599	0.00281663	8.8076
ILMN_1753135	ALK	6.59298	6.61385	0.513074	6.60117
ILMN_2091217	ALKAL1	6.66412	6.63659	0.122591	6.65333
ILMN_1753933	ALKAL1	6.58026	6.63523	0.0132772	6.60181
ILMN_3247082	ALKAL2	6.73604	6.75871	0.650174	6.74493
ILMN_2089752	ALKAL2	6.4986	6.48046	0.743394	6.49149
ILMN_1758038	ALKBH1	7.52746	7.55598	0.286229	7.53864
ILMN_2375973	ALKBH1	7.48059	7.52302	0.135776	7.49723
ILMN_2276750	ALKBH1	6.67778	6.72239	0.042465	6.69527
ILMN_1690252	ALKBH2	8.18512	7.93669	6.76989e-06	8.08772
ILMN_2134062	ALKBH3	8.77082	8.49714	1.10735e-07	8.66352
ILMN_3226276	ALKBH3	7.55711	7.44293	0.00161195	7.51234
ILMN_3298800	ALKBH3	7.24811	7.07395	4.1789e-07	7.17983
ILMN_1805673	ALKBH4	7.01024	6.88773	0.00632066	6.96221
ILMN_1657283	ALKBH5	11.8907	11.9494	0.103208	11.9137
ILMN_1808792	ALKBH6	8.45032	8.50753	0.115669	8.47275
ILMN_1761764	ALKBH7	8.97785	8.70748	3.10419e-05	8.87185
ILMN_1779190	ALKBH8	7.08263	6.86672	1.14618e-06	6.99798
ILMN_1784583	ALLC	6.52116	6.52092	0.990176	6.52107
ILMN_1681046	ALLC	6.43294	6.41774	0.430642	6.42698
ILMN_1796946	ALLC	6.24185	6.24363	0.934771	6.24255
ILMN_1709474	ALMS1	7.3477	7.29464	0.0641977	7.3269
ILMN_1774369	ALMS1P1	6.8666	6.94524	0.0095564	6.89743
ILMN_3237132	ALMS1P1	6.84504	6.89375	0.0860033	6.86414
ILMN_1713731	ALOX12	6.62108	6.64377	0.689205	6.62998
ILMN_1692332	ALOX12B	6.41608	6.37758	0.168272	6.40098
ILMN_2137544	ALOX12P2	6.65857	6.56869	0.00597645	6.62333
ILMN_1735987	ALOX12P2	6.62865	6.56573	0.00905144	6.60398
ILMN_1783443	ALOX15	6.66083	6.65131	0.647186	6.6571
ILMN_2403534	ALOX15	6.55	6.5928	0.0297614	6.56678
ILMN_1729320	ALOX15	6.49736	6.48241	0.463401	6.4915
ILMN_2393149	ALOX15B	7.38495	7.12925	6.95614e-05	7.28469
ILMN_1751975	ALOX15B	6.43784	6.45799	0.509299	6.44574
ILMN_2276904	ALOX15B	6.25672	6.27194	0.499603	6.26268
ILMN_1680996	ALOX5	10.3345	11.0286	0.0138887	10.6066
ILMN_1792150	ALOX5	6.95557	7.12484	6.15938e-06	7.02194
ILMN_1797875	ALOX5AP	10.2872	11.1952	0.00187053	10.6432
ILMN_1678255	ALOXE3	6.60619	6.60885	0.882527	6.60723
ILMN_1752669	ALPI	6.73068	6.77501	0.0264717	6.74806
ILMN_2078697	ALPK1	7.98089	7.90876	0.26103	7.95261
ILMN_1811238	ALPK2	6.29245	6.28034	0.525991	6.2877
ILMN_1734630	ALPK3	6.45686	6.47986	0.256235	6.46587
ILMN_1701603	ALPL	6.40317	6.74525	2.7009e-05	6.53729
ILMN_1693789	ALPP	11.9152	12.0208	0.257293	11.9566
ILMN_1750256	ALS2	9.35882	8.88715	2.72251e-05	9.1739
ILMN_1700596	ALS2CL	6.72099	6.7717	0.0131765	6.74088
ILMN_1702322	ALS2CL	6.5288	6.17651	3.53659e-09	6.39068
ILMN_1690636	ALS2CL	6.38125	6.36855	0.509372	6.37627
ILMN_1765674	ALS2CR12	6.49108	6.63336	0.000110351	6.54686
ILMN_3236443	ALX1	6.89883	7.07337	0.00184954	6.96726
ILMN_1724540	ALX1	6.41173	6.52115	0.0893088	6.45463
ILMN_1729325	ALX3	6.81886	6.81859	0.991305	6.81875
ILMN_2191902	ALX3	6.34507	6.35307	0.734081	6.3482
ILMN_1803384	ALX4	6.32482	6.34133	0.435853	6.3313
ILMN_1750518	ALYREF	9.48765	9.64888	0.133048	9.55086
ILMN_2364062	ALYREF	7.79575	7.93629	0.183984	7.85085
ILMN_1688390	ALYREF	7.06309	7.06903	0.865639	7.06542
ILMN_1759670	AMACR	7.2277	7.10891	0.0010468	7.18112
ILMN_1792741	AMACR	7.07804	6.93095	0.00011961	7.02037
ILMN_2367172	AMACR	6.88023	6.55459	6.03239e-10	6.75256
ILMN_1697611	AMBN	6.73167	6.77399	0.08317	6.74826
ILMN_1794384	AMBN	6.58314	6.64452	0.0212403	6.60721
ILMN_1751092	AMBN	6.47627	6.47945	0.902402	6.47751
ILMN_1695446	AMBP	6.42965	6.41598	0.51055	6.42429
ILMN_1662681	AMBRA1	6.8756	6.8052	0.00360312	6.848
ILMN_1788462	AMD1	10.6264	10.1462	4.44394e-07	10.4381
ILMN_1667994	AMD1	9.37028	9.10264	0.0144466	9.26534
ILMN_1788239	AMDHD1	6.71246	6.7308	0.663988	6.71965
ILMN_1789005	AMDHD2	12.2313	12.5539	1.85194e-06	12.3578
ILMN_1695759	AMDHD2	7.2229	7.41545	0.000176792	7.29839
ILMN_2397406	AMELX	6.41566	6.46331	0.0191042	6.43434
ILMN_1727258	AMELY	6.48618	6.46697	0.354101	6.47865
ILMN_1750051	AMER1	8.13593	7.89046	2.25809e-05	8.03969
ILMN_3237153	AMER1	6.74189	6.62218	3.99954e-06	6.69496
ILMN_2394362	AMER2	6.58672	6.60643	0.4234	6.59445
ILMN_2394366	AMER2	6.44142	6.45218	0.597371	6.44563
ILMN_1810131	AMER2	6.41478	6.44514	0.248745	6.42669
ILMN_3178393	AMER3	6.65626	6.67859	0.221242	6.66501
ILMN_2122153	AMER3	6.54784	6.59564	0.0192496	6.56658
ILMN_1723116	AMFR	8.5131	8.8493	0.000309227	8.64491
ILMN_1666258	AMFR	7.0887	7.27387	2.64967e-05	7.1613
ILMN_1736412	AMHR2	6.78515	6.77312	0.920813	6.78043
ILMN_1765460	AMIGO1	6.78632	6.82743	0.0484713	6.80244
ILMN_1725896	AMIGO2	6.36686	6.37588	0.687803	6.3704
ILMN_1738233	AMIGO3	6.58711	6.53472	0.0194318	6.56657
ILMN_1779374	AMMECR1	7.72533	8.2437	4.40971e-06	7.92857
ILMN_2394242	AMMECR1	7.00666	7.23821	0.000158976	7.09744
ILMN_1670506	AMMECR1	6.88138	7.08182	1.89409e-05	6.95996
ILMN_1727023	AMMECR1L	7.79982	7.68878	0.00264676	7.75629
ILMN_1683901	AMN	6.75789	6.78319	0.156829	6.76781
ILMN_1750880	AMN1	6.85468	6.80558	0.146881	6.83543
ILMN_1792409	AMOT	7.49923	7.21554	0.000107627	7.38801
ILMN_1778788	AMOTL2	7.22648	7.33595	0.0156999	7.2694
ILMN_1759312	AMPD1	6.25559	6.28643	0.214991	6.26768
ILMN_1786899	AMPD2	6.44634	6.41054	0.218649	6.4323
ILMN_1701589	AMPD2	6.40468	6.40106	0.84966	6.40326
ILMN_1731223	AMPD3	6.79845	6.83038	0.219405	6.81097
ILMN_1774447	AMPD3	6.78038	6.7802	0.996385	6.78031
ILMN_1660854	AMPD3	6.5299	6.55483	0.329721	6.53968
ILMN_1665307	AMPD3	6.25619	6.29776	0.05388	6.27248
ILMN_1685834	AMPH	6.40233	6.55062	0.0343848	6.46047
ILMN_1725297	AMPH	6.40927	6.44286	0.08049	6.42244
ILMN_1665331	AMT	8.96486	8.59824	1.62578e-05	8.82112
ILMN_1713927	AMTN	6.27469	6.26495	0.534888	6.27088
ILMN_2094262	AMY1A	6.70691	6.71707	0.72034	6.7109
ILMN_1797796	AMY1A	6.62807	6.68874	0.011606	6.65186
ILMN_1719031	AMY1A	6.48956	6.49771	0.719945	6.49276
ILMN_2408219	AMY1A	6.14841	6.14253	0.733014	6.14611
ILMN_1663313	AMY1B	11.567	11.4755	0.279826	11.5311
ILMN_2294762	AMY1B	8.41237	8.31007	0.294011	8.37226
ILMN_2094261	AMY1B	6.75341	6.77629	0.451601	6.76238
ILMN_1726327	AMY1C	7.59212	7.62657	0.43297	7.60563
ILMN_1801303	AMY2A	8.02869	7.92892	0.19674	7.98957
ILMN_1751102	AMY2A	6.68565	6.70374	0.340003	6.69274
ILMN_2131123	AMY2A	6.52742	6.50701	0.281838	6.51942
ILMN_3238486	AMY2A	6.50876	6.53588	0.205537	6.51939
ILMN_1671183	AMY2B	7.0564	7.16645	0.000484608	7.09955
ILMN_2073157	AMY2B	7.10274	7.07037	0.469832	7.09005
ILMN_1694882	AMY2B	7.02901	7.01139	0.701729	7.0221
ILMN_3236904	AMY2B	6.98827	6.91041	0.0646843	6.95774
ILMN_1785742	AMZ1	6.43327	6.41326	0.356902	6.42542
ILMN_1801606	AMZ2	10.1042	10.212	0.0376315	10.1465
ILMN_2309549	AMZ2	6.43295	6.42932	0.879019	6.43153
ILMN_1756918	AMZ2P1	6.74644	6.79079	0.0351946	6.76383
ILMN_1659553	ANAPC1	8.42218	8.38602	0.486373	8.40801
ILMN_1719149	ANAPC1	7.56691	7.55653	0.816683	7.56284
ILMN_3299447	ANAPC1	6.99322	7.01716	0.536503	7.00261
ILMN_1664435	ANAPC1	6.52236	6.51749	0.793445	6.52045
ILMN_1770378	ANAPC10	8.69693	8.64487	0.196283	8.67652
ILMN_1722102	ANAPC11	10.1064	10.1858	0.100697	10.1375
ILMN_2343563	ANAPC11	8.33476	8.36203	0.554861	8.34545
ILMN_1753773	ANAPC11	6.79079	6.82908	0.10093	6.80581
ILMN_1777453	ANAPC11	6.75583	6.70849	0.306681	6.73727
ILMN_1655819	ANAPC11	6.75257	6.71032	0.138364	6.73601
ILMN_1774669	ANAPC11	6.66498	6.61403	0.00560604	6.645
ILMN_3236284	ANAPC11	6.39819	6.40423	0.727403	6.40056
ILMN_1726281	ANAPC11	6.39184	6.40562	0.548658	6.39724
ILMN_1793894	ANAPC13	11.1245	10.9249	2.77093e-06	11.0463
ILMN_1726104	ANAPC15	8.0308	8.23718	0.000481124	8.11172
ILMN_1738955	ANAPC16	8.50178	8.46372	0.506776	8.48686
ILMN_3242647	ANAPC1P1	6.55409	6.56204	0.711513	6.55721
ILMN_3244779	ANAPC1P1	6.54701	6.56124	0.476361	6.55259
ILMN_1662807	ANAPC1P1	6.47055	6.46522	0.750575	6.46846
ILMN_1813243	ANAPC2	7.12352	7.04027	0.0352998	7.09088
ILMN_1733096	ANAPC2	6.64948	6.61275	0.124994	6.63508
ILMN_3241739	ANAPC2	6.58833	6.58464	0.875326	6.58688
ILMN_1722054	ANAPC2	6.48651	6.47931	0.739808	6.48369
ILMN_1802973	ANAPC4	10.047	9.88061	0.000494501	9.98175
ILMN_1723177	ANAPC5	11.2794	11.0393	1.53204e-08	11.1853
ILMN_2199284	ANAPC7	7.34101	7.14295	0.00205267	7.26336
ILMN_1760727	ANG	7.35925	7.93763	1.31712e-07	7.58601
ILMN_2294976	ANG	6.8964	7.16775	9.95683e-06	7.00279
ILMN_1696974	ANG	6.86375	7.189	2.15135e-06	6.99127
ILMN_2239408	ANG	6.61521	6.6381	0.257437	6.62418
ILMN_2408572	ANG	6.48617	6.66944	0.00100029	6.55803
ILMN_2294978	ANG	6.44516	6.68234	0.000779229	6.53815
ILMN_1665871	ANGEL1	8.16773	7.95911	1.07608e-06	8.08594
ILMN_1736340	ANGEL2	9.8721	9.76543	0.0306021	9.83028
ILMN_1677723	ANGPT1	10.1781	8.67165	4.39748e-12	9.58746
ILMN_2086890	ANGPT1	9.1947	8.10838	5.97326e-10	8.76878
ILMN_1774207	ANGPT2	7.00607	6.6811	0.00269198	6.87866
ILMN_3250067	ANGPT2	6.78541	6.5124	0.000768195	6.67837
ILMN_3250879	ANGPT2	6.61489	6.63849	0.252042	6.62414
ILMN_1758443	ANGPT4	6.21756	6.20278	0.509388	6.21177
ILMN_1669773	ANGPTL1	6.4047	6.40535	0.977479	6.40496
ILMN_1772612	ANGPTL2	6.41214	6.42639	0.664312	6.41773
ILMN_1695193	ANGPTL3	6.68237	6.75739	0.00164406	6.71179
ILMN_2143220	ANGPTL3	6.52339	6.52469	0.951546	6.5239
ILMN_2386444	ANGPTL4	7.03992	7.15419	0.000500736	7.08472
ILMN_1674376	ANGPTL4	6.43778	6.38604	0.0363627	6.4175
ILMN_1707727	ANGPTL4	6.35466	6.36241	0.86216	6.3577
ILMN_2166696	ANGPTL5	6.41658	6.44245	0.195489	6.42672
ILMN_1725518	ANGPTL6	7.59408	7.23347	4.56068e-05	7.45269
ILMN_1813361	ANGPTL7	6.42723	6.47209	0.150644	6.44482
ILMN_1764714	ANGPTL8	6.66816	6.62398	0.0219214	6.65084
ILMN_1758649	ANHX	6.73072	6.74084	0.580901	6.73469
ILMN_1684694	ANK1	6.69631	7.40238	4.42919e-05	6.97314
ILMN_2317186	ANK1	6.23302	6.34899	0.00444391	6.27849
ILMN_1776363	ANK2	6.43097	6.4762	0.0393008	6.4487
ILMN_1652729	ANK2	6.28384	6.29348	0.61026	6.28762
ILMN_1661875	ANK3	6.83386	6.88146	0.0318381	6.85252
ILMN_2390609	ANK3	6.70555	6.73106	0.215929	6.71555
ILMN_1651943	ANK3	6.64556	6.64761	0.922259	6.64637
ILMN_2112829	ANKAR	7.05103	6.83865	3.18672e-06	6.96776
ILMN_2112834	ANKAR	6.52863	6.55312	0.337069	6.53823
ILMN_1813139	ANKDD1A	7.79017	7.79475	0.951223	7.79197
ILMN_1857968	ANKDD1B	6.63798	6.65457	0.460882	6.64448
ILMN_3226919	ANKDD1B	6.39674	6.43316	0.0888951	6.41102
ILMN_2367300	ANKEF1	6.62227	6.60726	0.434647	6.61639
ILMN_1793466	ANKEF1	6.5139	6.53475	0.381154	6.52208
ILMN_1728957	ANKEF1	6.18466	6.19996	0.43368	6.19065
ILMN_1811239	ANKFN1	6.30072	6.3095	0.663451	6.30416
ILMN_1794470	ANKFY1	8.86901	9.02388	0.00953806	8.92973
ILMN_1801464	ANKFY1	7.47664	7.63475	0.00146198	7.53863
ILMN_1735364	ANKFY1	6.96984	7.0033	0.256601	6.98296
ILMN_1692080	ANKH	6.12109	6.17503	0.0549163	6.14224
ILMN_1765091	ANKHD1	8.67907	8.77949	0.00874431	8.71844
ILMN_2341382	ANKHD1	6.87627	6.93521	0.0253226	6.89938
ILMN_1778304	ANKHD1	6.36136	6.34968	0.522069	6.35678
ILMN_2197225	ANKHD1-EIF4EBP3	8.07691	7.92807	0.000866486	8.01855
ILMN_1766560	ANKHD1-EIF4EBP3	7.03646	7.02621	0.785822	7.03244
ILMN_3241218	ANKIB1	9.36014	9.37818	0.726865	9.36722
ILMN_1797873	ANKK1	6.39769	6.39375	0.842677	6.39614
ILMN_1751744	ANKLE1	7.28676	7.3773	0.249584	7.32226
ILMN_3243457	ANKLE1	7.11434	7.10678	0.894114	7.11138
ILMN_3249608	ANKLE2	9.4642	9.15242	3.52522e-09	9.34196
ILMN_1667873	ANKLE2	6.87274	6.91193	0.0550801	6.8881
ILMN_1729081	ANKLE2	6.66788	6.70698	0.0577921	6.68321
ILMN_1677979	ANKLE2	6.67869	6.68925	0.541865	6.68283
ILMN_1754271	ANKLE2	6.64259	6.6029	0.0564052	6.62703
ILMN_1667305	ANKLE2	6.57134	6.57507	0.836847	6.5728
ILMN_1729248	ANKLE2	6.53348	6.55681	0.178425	6.54263
ILMN_1764615	ANKLE2	6.42917	6.426	0.873024	6.42793
ILMN_1772663	ANKLE2	6.40716	6.44186	0.185127	6.42077
ILMN_1675146	ANKLE2	6.33451	6.36592	0.119692	6.34682
ILMN_1675483	ANKMY1	9.49889	9.28325	0.000379872	9.41434
ILMN_1799369	ANKMY1	6.34466	6.35266	0.673937	6.3478
ILMN_2251062	ANKMY1	6.35715	6.30161	0.0194704	6.33538
ILMN_1784292	ANKMY2	8.74972	8.41432	1.08748e-06	8.61822
ILMN_2185563	ANKRA2	8.76145	8.76801	0.902644	8.76402
ILMN_1687351	ANKRA2	8.50443	8.55446	0.269688	8.52405
ILMN_1716264	ANKRD1	6.65667	6.67752	0.360911	6.66484
ILMN_2115218	ANKRD10	8.85288	8.82356	0.58736	8.84139
ILMN_1711828	ANKRD10	8.10751	8.11112	0.941841	8.10893
ILMN_2108709	ANKRD11	9.88149	9.88085	0.98828	9.88124
ILMN_1690465	ANKRD11	6.66231	6.66466	0.909409	6.66323
ILMN_1733674	ANKRD11	6.52428	6.51146	0.516783	6.51926
ILMN_1661833	ANKRD12	8.55863	8.705	0.00923816	8.61602
ILMN_1689908	ANKRD13A	10.0589	10.2495	0.000562475	10.1336
ILMN_1794070	ANKRD13B	6.82888	6.82529	0.879821	6.82748
ILMN_2148507	ANKRD13C	7.62974	7.76718	0.00120566	7.68362
ILMN_1672356	ANKRD13D	8.5389	8.62073	0.318784	8.57098
ILMN_1807112	ANKRD13D	6.7506	6.74667	0.878305	6.74906
ILMN_1790351	ANKRD13D	6.68065	6.67185	0.757888	6.6772
ILMN_1660183	ANKRD13D	6.503	6.52236	0.404928	6.51059
ILMN_1662902	ANKRD13D	6.50892	6.48403	0.375897	6.49916
ILMN_1667830	ANKRD13D	6.29814	6.30725	0.64466	6.30171
ILMN_1659156	ANKRD16	8.02938	7.7056	1.14865e-08	7.90244
ILMN_1675435	ANKRD16	7.49739	7.34837	0.00167572	7.43896
ILMN_2353431	ANKRD16	7.28066	7.11893	3.37317e-05	7.21725
ILMN_1712019	ANKRD17	8.75908	8.60661	0.000896388	8.6993
ILMN_2406335	ANKRD17	7.85283	7.73713	0.00392416	7.80747
ILMN_1787064	ANKRD17	6.91149	6.74604	1.97028e-05	6.84662
ILMN_3190486	ANKRD18A	6.40791	6.45721	0.385667	6.42724
ILMN_1681751	ANKRD18DP	6.37577	6.32713	0.0634251	6.3567
ILMN_1682547	ANKRD2	6.51544	6.53753	0.243841	6.5241
ILMN_1747839	ANKRD20A1	6.91552	6.94606	0.655515	6.9275
ILMN_1676440	ANKRD20A11P	7.52905	7.47248	0.167344	7.50687
ILMN_1793572	ANKRD20A11P	7.38346	7.35742	0.795377	7.37325
ILMN_1724299	ANKRD20A11P	6.62988	6.6612	0.231849	6.64216
ILMN_1767805	ANKRD20A11P	6.57639	6.63065	0.0941302	6.59767
ILMN_1677852	ANKRD20A11P	6.57662	6.58488	0.676926	6.57986
ILMN_1679184	ANKRD20A2	6.93828	6.98241	0.476887	6.95558
ILMN_2398211	ANKRD20A2	6.76263	6.80606	0.0526517	6.77966
ILMN_3244353	ANKRD20A2	6.3162	6.28038	0.0508047	6.30216
ILMN_1670452	ANKRD20A3	7.12594	7.16797	0.542503	7.14242
ILMN_2289424	ANKRD20A3	6.23703	6.22662	0.592321	6.23295
ILMN_1680631	ANKRD20A3	6.23872	6.20808	0.125403	6.22671
ILMN_2215824	ANKRD20A4	8.20224	8.16302	0.735896	8.18686
ILMN_3240529	ANKRD20A4	6.4293	6.43601	0.754995	6.43193
ILMN_1711499	ANKRD20A4	6.42475	6.43508	0.611959	6.4288
ILMN_2132599	ANKRD22	7.25632	7.56697	4.68908e-05	7.37812
ILMN_1799848	ANKRD22	6.84187	7.07426	0.00374627	6.93298
ILMN_1710979	ANKRD23	8.21548	8.31076	0.0303042	8.25284
ILMN_2227338	ANKRD23	7.16672	7.1429	0.425699	7.15738
ILMN_1747151	ANKRD23	6.64498	6.67738	0.193685	6.65768
ILMN_1768202	ANKRD24	6.94238	6.89779	0.134322	6.9249
ILMN_2101368	ANKRD24	6.2446	6.20648	0.03778	6.22965
ILMN_1740161	ANKRD26	7.09509	7.0647	0.300858	7.08318
ILMN_1794063	ANKRD27	7.6515	7.67616	0.649555	7.66117
ILMN_2232520	ANKRD28	9.30794	8.65045	6.17106e-08	9.05016
ILMN_1697594	ANKRD28	7.90217	7.48612	3.49899e-08	7.73905
ILMN_1749338	ANKRD29	6.37793	6.36728	0.635533	6.37375
ILMN_2075643	ANKRD29	6.25074	6.24817	0.918269	6.24973
ILMN_1796059	ANKRD30A	6.09781	6.10989	0.51487	6.10255
ILMN_1813607	ANKRD30A	6.07658	6.04858	0.121594	6.0656
ILMN_1730678	ANKRD30B	11.5894	11.696	0.110108	11.6312
ILMN_1672000	ANKRD30B	6.232	6.24802	0.382154	6.23828
ILMN_3304941	ANKRD30BL	6.54093	6.53474	0.752841	6.5385
ILMN_1749341	ANKRD30BL	6.49687	6.47458	0.283939	6.48813
ILMN_3226251	ANKRD30BL	6.46744	6.50063	0.0868948	6.48045
ILMN_1801641	ANKRD30BL	6.0033	6.0133	0.639471	6.00722
ILMN_1708056	ANKRD31	6.56694	6.57226	0.829319	6.56902
ILMN_3288840	ANKRD31	6.47391	6.45242	0.241845	6.46548
ILMN_3212340	ANKRD31	6.44987	6.43297	0.336935	6.44325
ILMN_1667748	ANKRD33	8.59976	8.74392	0.204454	8.65628
ILMN_2119793	ANKRD34A	6.67436	6.6903	0.42351	6.68061
ILMN_1655766	ANKRD34B	6.07377	6.1572	0.0881816	6.10648
ILMN_1758215	ANKRD34C	6.75131	6.82764	0.00702003	6.78124
ILMN_1798006	ANKRD35	7.32723	7.35294	0.782383	7.33731
ILMN_2145153	ANKRD35	7.07393	7.14004	0.0808808	7.09985
ILMN_1780806	ANKRD36B	9.15217	8.87578	0.0237301	9.04381
ILMN_2382431	ANKRD36B	7.52625	7.2436	0.000566242	7.41543
ILMN_2189614	ANKRD36B	7.2056	6.97924	9.68899e-07	7.11685
ILMN_3243782	ANKRD36B	6.66094	6.5816	0.00240588	6.62983
ILMN_1696497	ANKRD36B	6.37409	6.40498	0.224269	6.3862
ILMN_3220952	ANKRD36B	6.35093	6.34354	0.743043	6.34803
ILMN_3304802	ANKRD36BP1	6.67965	6.73392	0.0125135	6.70093
ILMN_1746695	ANKRD36BP2	6.84931	6.92508	0.0070355	6.87902
ILMN_1713676	ANKRD36BP2	6.56287	6.5724	0.649886	6.56661
ILMN_3230521	ANKRD36BP2	6.50694	6.53366	0.158202	6.51742
ILMN_1688790	ANKRD36BP2	6.35644	6.39179	0.147188	6.3703
ILMN_1756417	ANKRD37	7.12219	7.4509	0.000185285	7.25106
ILMN_1758846	ANKRD40	7.57733	7.73276	0.000177584	7.63827
ILMN_1676605	ANKRD42	6.32372	6.25768	0.00136512	6.29783
ILMN_2059844	ANKRD44	7.35798	7.49118	0.0716462	7.41021
ILMN_1712298	ANKRD46	7.89035	7.59295	2.20426e-05	7.77375
ILMN_1669259	ANKRD49	8.93821	8.88	0.243541	8.91539
ILMN_2226304	ANKRD50	7.94369	7.58471	1.64444e-06	7.80295
ILMN_3244029	ANKRD52	6.96363	6.88942	0.0203253	6.93453
ILMN_1772660	ANKRD53	6.62019	6.61324	0.722287	6.61747
ILMN_1766309	ANKRD54	8.29769	7.96974	1.1088e-06	8.16911
ILMN_3310481	ANKRD54	6.52254	6.47639	0.105724	6.50445
ILMN_1798947	ANKRD55	6.31064	6.32159	0.714222	6.31493
ILMN_2341724	ANKRD55	6.21501	6.25565	0.226986	6.23094
ILMN_2178587	ANKRD6	7.49019	7.49601	0.92081	7.49247
ILMN_1698159	ANKRD6	6.79498	6.77045	0.351573	6.78536
ILMN_1751045	ANKRD60	6.64402	6.61233	0.118121	6.6316
ILMN_1679810	ANKRD62	6.4048	6.4382	0.156778	6.4179
ILMN_3287144	ANKRD63	6.46128	6.46789	0.733716	6.46387
ILMN_1708608	ANKRD65	6.263	6.30131	0.110698	6.27802
ILMN_1671615	ANKRD66	6.43531	6.44506	0.615106	6.43913
ILMN_2354930	ANKRD7	6.83832	6.84127	0.879665	6.83947
ILMN_1779951	ANKRD7	6.65769	6.70527	0.0449968	6.67634
ILMN_2048607	ANKRD9	8.14409	8.80702	0.000552509	8.404
ILMN_1675937	ANKRD9	6.86728	7.1196	0.00121754	6.96621
ILMN_1813669	ANKS1A	9.02326	8.89729	0.0310567	8.97387
ILMN_1696131	ANKS1B	6.54378	6.57916	0.121675	6.55765
ILMN_1758392	ANKS1B	6.51209	6.52676	0.521223	6.51784
ILMN_2340974	ANKS1B	6.50024	6.49784	0.930622	6.4993
ILMN_1751636	ANKS3	7.51523	7.36317	0.000579309	7.45561
ILMN_2199658	ANKS4B	6.53143	6.53943	0.669647	6.53456
ILMN_1691716	ANKS6	6.99342	6.9976	0.88322	6.99506
ILMN_1735108	ANKS6	6.49253	6.50772	0.332122	6.49849
ILMN_3194118	ANKUB1	6.35145	6.39394	0.0131695	6.36811
ILMN_1677487	ANKZF1	8.28724	8.28756	0.995436	8.28736
ILMN_2370692	ANKZF1	6.82086	6.81881	0.93288	6.82005
ILMN_2273796	ANKZF1	6.49569	6.48905	0.72841	6.49309
ILMN_1739645	ANLN	6.69928	6.87565	0.0269911	6.76843
ILMN_1717909	ANO1	6.53697	6.5424	0.776434	6.53909
ILMN_3237961	ANO1	6.52488	6.54863	0.25016	6.53419
ILMN_2091310	ANO1	6.2098	6.20307	0.789269	6.20716
ILMN_1767111	ANO10	7.6727	7.62134	0.315643	7.65256
ILMN_3248094	ANO2	6.58173	6.52087	0.0139172	6.55787
ILMN_1699121	ANO2	6.57572	6.51593	0.0182561	6.55228
ILMN_3240765	ANO3	6.28731	6.29368	0.731612	6.28981
ILMN_2049672	ANO3	6.04831	6.02113	0.196534	6.03765
ILMN_2228215	ANO4	6.3577	6.37449	0.493998	6.36428
ILMN_1745134	ANO4	6.35274	6.3554	0.892448	6.35378
ILMN_1690154	ANO5	6.25756	6.26968	0.537454	6.26231
ILMN_1674941	ANO6	8.65747	8.69644	0.560201	8.67275
ILMN_1683824	ANO7	6.67597	6.6887	0.522806	6.68096
ILMN_1675423	ANO7	6.3678	6.39897	0.152568	6.38002
ILMN_1732948	ANO7	6.14593	6.1749	0.108688	6.15729
ILMN_1709124	ANO8	7.40478	7.26589	0.0229238	7.35033
ILMN_1769259	ANO9	7.09401	7.10111	0.921239	7.0968
ILMN_1762629	ANO9	6.95633	6.98393	0.409307	6.96715
ILMN_1798679	ANO9	6.49622	6.45546	0.602189	6.48024
ILMN_1748874	ANO9	6.44846	6.47792	0.165763	6.46001
ILMN_1750373	ANOS1	6.17593	6.16477	0.715402	6.17156
ILMN_1807945	ANP32A	6.95667	6.89921	0.0397054	6.93414
ILMN_1684293	ANP32B	13.1792	13.1706	0.890363	13.1758
ILMN_1728191	ANP32D	6.44572	6.45918	0.524998	6.451
ILMN_1684923	ANP32E	6.58819	6.60041	0.578665	6.59298
ILMN_1763837	ANPEP	8.34586	8.41924	0.60671	8.37463
ILMN_2387995	ANTXR1	6.93071	6.86197	0.0126448	6.90376
ILMN_1811877	ANTXR1	6.75986	6.77478	0.437771	6.76571
ILMN_1780894	ANTXR1	6.56104	6.60953	0.0202106	6.58005
ILMN_1670379	ANTXR1	6.4302	6.39748	0.160357	6.41737
ILMN_1812926	ANTXR2	10.1128	9.82192	0.000791167	9.99878
ILMN_2184184	ANXA1	13.1578	12.7792	0.0043368	13.0093
ILMN_1699421	ANXA10	6.59225	6.63808	0.0262749	6.61022
ILMN_1685170	ANXA11	9.41397	9.40261	0.867789	9.40952
ILMN_2380494	ANXA11	8.17287	8.2367	0.208475	8.19789
ILMN_1807003	ANXA11	7.50224	7.56845	0.285877	7.5282
ILMN_2412490	ANXA13	6.51648	6.50148	0.446701	6.5106
ILMN_1737612	ANXA13	6.43366	6.44504	0.555658	6.43812
ILMN_1799243	ANXA13	6.23441	6.26607	0.0786878	6.24682
ILMN_2409167	ANXA2	11.556	12.1086	0.00361314	11.7727
ILMN_1711899	ANXA2	8.11183	8.7078	0.000210063	8.34549
ILMN_1755937	ANXA2	7.09172	7.3842	0.000702307	7.20639
ILMN_2098616	ANXA2R	9.96351	9.84203	0.309447	9.91588
ILMN_1694548	ANXA3	6.7297	6.86003	0.17787	6.7808
ILMN_1711408	ANXA4	6.97754	6.88946	0.0676562	6.94301
ILMN_1741003	ANXA5	9.17612	10.1341	0.00031742	9.55172
ILMN_1678612	ANXA6	7.67064	7.78881	0.0706649	7.71697
ILMN_2326591	ANXA6	7.18457	7.26825	0.166323	7.21738
ILMN_1703791	ANXA7	10.9029	10.798	0.0627046	10.8618
ILMN_1662322	ANXA7	6.23707	6.20459	0.0947385	6.22434
ILMN_3242004	ANXA8	6.65584	6.65747	0.946821	6.65648
ILMN_1759493	ANXA8	6.61004	6.61047	0.983368	6.61021
ILMN_1661628	ANXA8	6.4677	6.47929	0.573755	6.47224
ILMN_1676804	ANXA8	6.35081	6.36327	0.565184	6.3557
ILMN_1656074	ANXA8	6.35284	6.35613	0.883308	6.35413
ILMN_2095610	ANXA8	6.34234	6.34043	0.949754	6.34159
ILMN_1755721	ANXA9	6.78011	6.8264	0.133451	6.79826
ILMN_2217601	ANXA9	6.22523	6.18759	0.0729739	6.21047
ILMN_1709820	AOAH	7.71297	8.34223	0.000220577	7.95968
ILMN_1731433	AOC1	6.6291	6.5193	0.0422196	6.58605
ILMN_1741431	AOC2	6.66818	6.68397	0.466638	6.67437
ILMN_1799863	AOC2	6.65152	6.64696	0.825633	6.64973
ILMN_2405185	AOC2	6.55147	6.55234	0.95981	6.55181
ILMN_1782086	AOC3	6.50438	6.51348	0.700319	6.50795
ILMN_2219618	AOC4P	11.7099	11.7373	0.768197	11.7206
ILMN_1661052	AOC4P	6.47056	6.45878	0.554392	6.46594
ILMN_1767113	AOX1	6.24436	6.24832	0.901888	6.24591
ILMN_2207562	AP1AR	6.40988	6.38731	0.40928	6.40103
ILMN_1781983	AP1B1	9.00554	9.24761	5.37514e-05	9.10045
ILMN_2387505	AP1B1	6.98486	6.9433	0.460049	6.96856
ILMN_2399622	AP1G1	8.11114	8.15988	0.355433	8.13025
ILMN_2399627	AP1G1	7.6471	7.77296	0.0666465	7.69645
ILMN_1754179	AP1G2	9.80875	9.42527	9.36777e-08	9.6584
ILMN_2276598	AP1G2	6.18225	6.18885	0.725621	6.18484
ILMN_1754738	AP1M1	10.1669	10.2527	0.0606955	10.2006
ILMN_1705861	AP1M2	6.36791	6.37438	0.788692	6.37044
ILMN_2316173	AP1S1	8.20235	8.05978	0.082135	8.14645
ILMN_1712806	AP1S1	8.0438	7.97529	0.228441	8.01694
ILMN_1751345	AP1S1	7.90922	7.74184	0.0355378	7.8436
ILMN_2120273	AP1S2	10.5377	10.8589	0.00787734	10.6636
ILMN_1766411	AP1S2	10.3416	10.663	0.0238659	10.4677
ILMN_1768610	AP1S3	6.46147	6.50277	0.0701123	6.47766
ILMN_1815306	AP2A1	7.51375	7.95621	1.36573e-09	7.68722
ILMN_2359211	AP2A1	6.94392	7.17795	1.84648e-05	7.03568
ILMN_1673108	AP2A1	6.45109	6.49426	0.0260047	6.46801
ILMN_1803779	AP2A2	7.69388	7.65879	0.550734	7.68013
ILMN_2331735	AP2B1	8.45254	8.37122	0.343197	8.42066
ILMN_1681998	AP2B1	8.13345	7.9655	0.0769868	8.0676
ILMN_2402798	AP2M1	10.2621	10.1717	0.10066	10.2267
ILMN_1699598	AP2M1	9.8184	9.83349	0.770294	9.82432
ILMN_1809957	AP2S1	12.6268	12.9856	6.39617e-09	12.7675
ILMN_1662426	AP2S1	10.6134	10.9934	2.17965e-07	10.7624
ILMN_1768867	AP3B1	10.307	10.3065	0.992495	10.3068
ILMN_1679256	AP3B2	6.40647	6.44471	0.0691408	6.42147
ILMN_1764945	AP3D1	8.63929	8.68123	0.205252	8.65573
ILMN_2390114	AP3D1	8.62431	8.68337	0.0587232	8.64747
ILMN_1667086	AP3M1	9.16275	9.04314	0.019049	9.11586
ILMN_2362122	AP3M1	8.4737	8.40141	0.154444	8.44536
ILMN_1701774	AP3M1	6.29759	6.30963	0.504319	6.30231
ILMN_1676946	AP3M2	8.01274	7.72217	2.44808e-05	7.89882
ILMN_1658911	AP3S1	9.11438	9.2273	0.201258	9.15866
ILMN_2311761	AP3S1	9.1022	9.1898	0.178537	9.13655
ILMN_1731596	AP3S2	7.149	7.14567	0.934634	7.1477
ILMN_1669377	AP4B1	10.2499	10.183	0.208465	10.2236
ILMN_1754531	AP4E1	8.25813	8.25601	0.961143	8.2573
ILMN_1779512	AP4M1	7.05854	6.84002	6.65893e-06	6.97287
ILMN_1760466	AP4S1	6.6902	6.63162	0.00446018	6.66723
ILMN_1717594	AP5B1	6.75482	6.95376	0.0154349	6.83282
ILMN_1741331	AP5M1	8.73633	8.76251	0.453566	8.7466
ILMN_3237641	AP5M1	8.03152	8.0123	0.631255	8.02399
ILMN_2204297	AP5M1	7.83342	7.83623	0.949559	7.83452
ILMN_1785644	AP5S1	8.18344	8.15343	0.459588	8.17167
ILMN_2083559	AP5Z1	7.33859	7.23445	0.0988602	7.29776
ILMN_1659463	APAF1	9.02549	9.07156	0.592528	9.04355
ILMN_2344798	APAF1	6.85455	6.92377	0.00856768	6.88169
ILMN_1668285	APBA1	6.56018	6.57241	0.538352	6.56497
ILMN_2182656	APBA1	6.14182	6.13974	0.911171	6.141
ILMN_1723626	APBA2	6.44975	6.44987	0.997578	6.4498
ILMN_1686610	APBA3	8.72184	8.92673	4.02636e-05	8.80217
ILMN_1699646	APBB1	6.53005	6.55881	0.128528	6.54133
ILMN_1769918	APBB1	6.30684	6.35489	0.0358392	6.32568
ILMN_1796271	APBB1	5.94935	5.94895	0.987376	5.94919
ILMN_1801710	APBB1IP	10.1029	10.1476	0.526968	10.1204
ILMN_3251699	APBB2	6.49922	6.48787	0.481975	6.49477
ILMN_1716790	APBB2	6.33918	6.32081	0.305755	6.33198
ILMN_1740772	APBB3	10.1077	10.1105	0.966913	10.1088
ILMN_2320513	APBB3	8.57326	8.57601	0.964496	8.57434
ILMN_1662668	APC	6.53574	6.50834	0.143079	6.525
ILMN_1659950	APC2	6.37972	6.342	0.261716	6.36493
ILMN_1656951	APCDD1	6.86354	6.905	0.52316	6.87979
ILMN_1689431	APCDD1L	6.34003	6.31687	0.255622	6.33095
ILMN_1708833	APCS	6.43892	6.3789	0.040209	6.41539
ILMN_1718023	APEH	10.555	10.4929	0.202554	10.5306
ILMN_1661886	APEX1	12.0988	11.485	6.5907e-11	11.8581
ILMN_2319344	APEX1	11.4031	10.74	3.04257e-10	11.1431
ILMN_1652505	APEX2	8.63669	8.91115	2.07444e-07	8.7443
ILMN_1658472	APH1A	10.216	10.1166	0.0411583	10.177
ILMN_2398388	APH1A	7.69144	7.73668	0.31443	7.70918
ILMN_1767816	APH1B	8.70795	8.88837	0.041815	8.77869
ILMN_1815051	API5	9.53271	9.49858	0.411864	9.51933
ILMN_1793598	APIP	8.99741	8.98334	0.816896	8.9919
ILMN_2128293	APIP	7.74252	7.63306	0.042993	7.6996
ILMN_1689353	APLN	6.53114	6.51711	0.439788	6.52564
ILMN_1700183	APLNR	6.44889	6.43979	0.712287	6.44532
ILMN_1763834	APLP1	6.60558	6.61492	0.648841	6.60924
ILMN_2396198	APLP1	6.46402	6.4611	0.878377	6.46287
ILMN_1710482	APLP2	8.99032	9.34679	0.00119827	9.13008
ILMN_1674394	APMAP	9.2398	9.27276	0.628994	9.25272
ILMN_1690884	APOA1	7.21216	6.92407	7.48277e-08	7.0992
ILMN_1688543	APOA2	6.55449	6.58575	0.137904	6.56674
ILMN_1675706	APOA4	6.45921	6.46842	0.646746	6.46282
ILMN_1754055	APOA5	6.35098	6.36047	0.676347	6.3547
ILMN_1664024	APOB	6.42227	6.40424	0.376635	6.4152
ILMN_1813881	APOBEC1	6.47127	6.46294	0.67308	6.46801
ILMN_1719143	APOBEC2	6.29784	6.38745	0.0413301	6.33297
ILMN_1680192	APOBEC3A	6.51255	6.73832	1.81615e-06	6.60107
ILMN_2219466	APOBEC3B	6.64305	6.90732	0.00471599	6.74666
ILMN_1675684	APOBEC3C	7.75494	7.99834	3.33638e-09	7.85037
ILMN_3307651	APOBEC3D	7.89757	8.09723	0.00880467	7.97585
ILMN_2296950	APOBEC3F	8.01347	8.25864	0.00380066	8.10959
ILMN_2412172	APOBEC3F	7.75843	7.99993	9.91993e-06	7.85311
ILMN_1710726	APOBEC3F	7.557	7.57125	0.753409	7.56259
ILMN_1702706	APOBEC3F	7.18071	7.29935	0.0114092	7.22722
ILMN_1802106	APOBEC3G	8.93784	9.13061	0.0202601	9.01342
ILMN_2232478	APOBEC3G	8.61579	8.85107	0.0038564	8.70804
ILMN_1664828	APOBEC3H	7.2535	7.30487	0.580344	7.27364
ILMN_1815425	APOBEC4	6.45314	6.46502	0.633028	6.4578
ILMN_1697925	APOBR	8.17113	8.10513	0.593824	8.14525
ILMN_1789007	APOC1	7.04233	7.47778	0.00133195	7.21306
ILMN_1802923	APOC2	7.67063	7.24189	0.00143626	7.50254
ILMN_1722070	APOC3	6.36401	6.37754	0.428996	6.36931
ILMN_1765605	APOC4	6.61145	6.61284	0.937088	6.61199
ILMN_1780170	APOD	6.1744	6.18295	0.879259	6.17775
ILMN_1740938	APOE	6.68626	6.91361	0.0860414	6.7754
ILMN_1809311	APOF	6.33818	6.3329	0.826285	6.33611
ILMN_1761511	APOH	6.04086	6.0861	0.0286219	6.0586
ILMN_1688631	APOL1	6.49443	6.49672	0.902568	6.49533
ILMN_1761793	APOL1	6.42465	6.39842	0.263585	6.41437
ILMN_2325337	APOL2	7.13096	7.07334	0.130556	7.10837
ILMN_2325338	APOL2	7.12515	7.07489	0.171995	7.10544
ILMN_2248822	APOL2	6.31883	6.30044	0.383795	6.31162
ILMN_1706582	APOL2	6.15859	6.16204	0.862246	6.15995
ILMN_1756862	APOL3	8.47125	8.77858	0.00510274	8.59174
ILMN_2369144	APOL3	6.57125	6.54805	0.347167	6.56216
ILMN_2283195	APOL3	5.96813	5.97739	0.675894	5.97176
ILMN_1779070	APOL4	7.01911	6.88224	0.0170501	6.96545
ILMN_1704682	APOL4	6.3932	6.38979	0.876464	6.39186
ILMN_1676177	APOL5	6.2275	6.22712	0.984072	6.22735
ILMN_1687201	APOL6	6.86948	6.97013	0.00344536	6.90894
ILMN_1723522	APOLD1	6.92287	6.69565	1.04459e-05	6.83378
ILMN_1731941	APOM	7.22962	7.34877	0.0217898	7.27634
ILMN_1721623	APOO	8.62066	8.54612	0.184585	8.59144
ILMN_1777483	APOOL	7.36095	7.32747	0.382461	7.34782
ILMN_2078724	APOPT1	11.5961	11.7085	0.265125	11.6402
ILMN_1662895	APOPT1	6.62799	6.61094	0.611743	6.6213
ILMN_2404063	APP	8.16976	8.2844	0.490782	8.21471
ILMN_2404065	APP	8.01549	8.01007	0.967555	8.01336
ILMN_1653283	APP	6.54184	6.58948	0.0571453	6.56052
ILMN_2149766	APPBP2	9.18915	8.90351	2.76075e-06	9.07716
ILMN_1694875	APPBP2	6.8472	6.86676	0.393068	6.85487
ILMN_1763730	APPL1	7.91112	7.9684	0.186914	7.93358
ILMN_1765076	APPL2	8.71154	8.64356	0.277871	8.68489
ILMN_1722491	APRT	10.719	10.4931	4.00487e-05	10.6304
ILMN_1726410	APRT	10.143	9.8371	1.14081e-05	10.0231
ILMN_2317348	APTX	8.91381	8.81754	0.0395532	8.87607
ILMN_1726752	APTX	8.34987	8.25701	0.0169108	8.31346
ILMN_3288755	APTX	7.6008	7.48817	0.0668819	7.55664
ILMN_3215743	APTX	6.47009	6.40643	0.0034757	6.44513
ILMN_2260058	APTX	6.2286	6.2095	0.312124	6.22111
ILMN_1776857	AQP1	6.72672	6.83371	0.0192742	6.76867
ILMN_1681103	AQP1	6.6249	6.77761	0.0482922	6.68477
ILMN_2090004	AQP10	6.43936	6.49599	0.409256	6.46156
ILMN_1762606	AQP11	6.59331	6.57792	0.567077	6.58728
ILMN_3246595	AQP12B	6.85123	6.87021	0.565222	6.85867
ILMN_1755714	AQP12B	6.48691	6.50474	0.40747	6.4939
ILMN_1732149	AQP2	6.54305	6.52728	0.46549	6.53687
ILMN_1651574	AQP3	6.55476	6.55465	0.998293	6.55472
ILMN_1676649	AQP4	6.34272	6.32115	0.271335	6.33426
ILMN_1747683	AQP4	6.07674	6.0693	0.722106	6.07382
ILMN_1807036	AQP5	6.05056	6.08555	0.120494	6.06428
ILMN_1666519	AQP6	6.45182	6.44725	0.823014	6.45003
ILMN_1786381	AQP6	6.31507	6.26598	0.061248	6.29583
ILMN_1672057	AQP7	6.46703	6.47947	0.525674	6.47191
ILMN_1738494	AQP7	6.36485	6.32305	0.0503884	6.34846
ILMN_1713462	AQP8	6.46188	6.47323	0.555239	6.46633
ILMN_1715068	AQP9	7.09519	8.49147	2.12349e-09	7.64263
ILMN_1717154	AQR	8.63972	8.70733	0.0298035	8.66622
ILMN_2177460	AQR	6.74589	6.68029	0.0391281	6.72017
ILMN_1767351	AR	6.81212	6.78033	0.610474	6.79966
ILMN_1659572	AR	6.256	6.27124	0.463782	6.26198
ILMN_1792540	AR	6.18098	6.16893	0.559983	6.17626
ILMN_3269719	ARAP1	8.49419	8.67626	0.0459935	8.56557
ILMN_1772233	ARAP1	8.24508	8.42445	0.071933	8.3154
ILMN_1786357	ARAP1	6.75693	7.00338	0.000281386	6.85355
ILMN_1767541	ARAP2	6.94449	7.18686	0.000409209	7.03952
ILMN_3244434	ARAP2	6.95799	7.13744	0.000255045	7.02834
ILMN_1709360	ARAP2	6.64846	6.70196	0.017564	6.66944
ILMN_1683867	ARAP2	6.00148	5.97912	0.283619	5.99271
ILMN_1812618	ARAP3	7.81671	8.49007	2.96456e-05	8.08071
ILMN_3240997	ARAP3	7.03062	7.5034	0.000108516	7.21598
ILMN_1711120	ARC	6.49936	6.41655	0.0378084	6.46689
ILMN_1699703	ARCN1	9.81708	9.92687	0.0578498	9.86012
ILMN_3236613	AREG	6.33445	6.31111	0.215551	6.3253
ILMN_1661458	ARF1	6.60503	6.5921	0.535669	6.59996
ILMN_1682938	ARF3	8.94993	8.71575	0.00271976	8.85811
ILMN_1719518	ARF4	11.1282	11.2235	0.0795691	11.1655
ILMN_1723884	ARF4	8.68106	8.94901	0.00402357	8.78611
ILMN_1752340	ARF5	10.0475	10.0988	0.433972	10.0676
ILMN_1675709	ARFGAP1	8.89033	8.77109	0.129666	8.84358
ILMN_1769250	ARFGAP2	8.96557	8.90147	0.0934416	8.94044
ILMN_1731287	ARFGAP3	9.3882	9.26488	0.0162778	9.33985
ILMN_2227800	ARFGAP3	6.16194	6.1776	0.448308	6.16808
ILMN_1728471	ARFGEF1	9.12544	9.0343	0.0201107	9.0897
ILMN_2221408	ARFGEF1	6.71564	6.62457	0.0399827	6.67993
ILMN_1789990	ARFGEF2	7.21571	7.23832	0.599729	7.22458
ILMN_1813100	ARFGEF3	6.37569	6.33405	0.036799	6.35936
ILMN_2403906	ARFIP1	8.20457	8.27064	0.223309	8.23047
ILMN_1768399	ARFIP1	6.86911	6.98599	0.00493466	6.91493
ILMN_2403911	ARFIP1	6.59348	6.58068	0.581711	6.58846
ILMN_1750690	ARFIP2	6.83271	6.83323	0.981916	6.83291
ILMN_1703989	ARFRP1	6.71284	6.62479	0.0176769	6.67832
ILMN_1812281	ARG1	6.64538	7.39332	1.27078e-08	6.93862
ILMN_1800898	ARG2	6.79807	6.78299	0.74033	6.79216
ILMN_1788468	ARGLU1	12.0447	11.8776	0.00629454	11.9791
ILMN_1732060	ARHGAP1	10.2762	10.2562	0.707433	10.2684
ILMN_1736112	ARHGAP10	7.20569	7.23796	0.689995	7.21834
ILMN_1744830	ARHGAP11A	6.70227	6.6694	0.37888	6.68938
ILMN_1673815	ARHGAP11A	6.39517	6.37571	0.328873	6.38754
ILMN_2395913	ARHGAP11B	6.72692	6.82786	0.00296687	6.7665
ILMN_1662550	ARHGAP11B	6.73835	6.74222	0.879139	6.73987
ILMN_1704134	ARHGAP11B	6.55485	6.60537	0.0102535	6.57465
ILMN_1691163	ARHGAP11B	6.55181	6.58275	0.083889	6.56394
ILMN_1661387	ARHGAP11B	6.54003	6.53668	0.859359	6.53872
ILMN_1684875	ARHGAP11B	6.50263	6.50298	0.986744	6.50277
ILMN_1753500	ARHGAP12	7.78821	7.931	0.0347124	7.84419
ILMN_2101810	ARHGAP12	6.68326	6.74243	0.00794533	6.70646
ILMN_2208413	ARHGAP15	11.1813	10.8797	2.09618e-05	11.0631
ILMN_1718610	ARHGAP17	10.5914	10.6013	0.877551	10.5953
ILMN_2398847	ARHGAP17	8.00103	8.06735	0.301083	8.02703
ILMN_1756693	ARHGAP17	6.73663	6.78304	0.0359873	6.75483
ILMN_1791186	ARHGAP18	6.74535	6.68531	0.103352	6.72181
ILMN_1688953	ARHGAP19	8.36274	8.62287	5.73351e-05	8.46473
ILMN_1782761	ARHGAP20	6.70891	6.66604	0.259669	6.6921
ILMN_1811592	ARHGAP21	9.11134	9.24778	0.251578	9.16483
ILMN_1676361	ARHGAP22	9.51718	8.04066	2.28583e-11	8.93828
ILMN_1764571	ARHGAP23	8.32001	7.95879	0.002292	8.17839
ILMN_1672742	ARHGAP23	6.51917	6.53584	0.378683	6.52571
ILMN_1801833	ARHGAP24	7.03266	7.68436	8.27312e-12	7.28817
ILMN_1765876	ARHGAP24	6.50155	7.32615	1.97681e-08	6.82485
ILMN_2352633	ARHGAP24	6.54896	6.76246	1.83647e-07	6.63267
ILMN_1775441	ARHGAP24	6.38217	6.68303	5.80926e-06	6.50012
ILMN_1777998	ARHGAP25	10.148	9.96401	0.0537528	10.0759
ILMN_1658853	ARHGAP25	6.66343	6.59843	0.0552787	6.63794
ILMN_1661971	ARHGAP25	6.62881	6.62366	0.764977	6.62679
ILMN_1711490	ARHGAP26	6.60594	6.71787	0.0119127	6.64983
ILMN_2103362	ARHGAP27	8.02539	8.11381	0.383778	8.06006
ILMN_1656361	ARHGAP27	7.14045	7.28206	0.0665476	7.19597
ILMN_1678300	ARHGAP27P1-BPTFP1-KPNA2P3	8.10167	8.1807	0.231208	8.13266
ILMN_3268717	ARHGAP27P1-BPTFP1-KPNA2P3	7.1284	7.07166	0.249873	7.10615
ILMN_1659110	ARHGAP27P1-BPTFP1-KPNA2P3	7.09159	7.07401	0.543244	7.0847
ILMN_1684987	ARHGAP27P1-BPTFP1-KPNA2P3	6.55691	6.56717	0.547015	6.56093
ILMN_1767178	ARHGAP27P1-BPTFP1-KPNA2P3	6.40566	6.40753	0.940385	6.40639
ILMN_1796772	ARHGAP28	6.62525	6.7393	0.000215642	6.66997
ILMN_1731178	ARHGAP28	6.36819	6.4056	0.0459847	6.38286
ILMN_1797753	ARHGAP28	6.28526	6.30744	0.253386	6.29396
ILMN_2290204	ARHGAP28	6.17742	6.17721	0.990588	6.17734
ILMN_1751474	ARHGAP29	6.25334	6.24174	0.50933	6.24879
ILMN_1750805	ARHGAP30	10.3453	10.6219	0.00270373	10.4538
ILMN_2408851	ARHGAP30	9.40488	9.68685	0.00254919	9.51543
ILMN_1751164	ARHGAP30	7.84449	8.05249	0.0123287	7.92604
ILMN_1752914	ARHGAP31	6.36742	6.56952	0.00140096	6.44666
ILMN_3251486	ARHGAP31	6.42376	6.44073	0.327901	6.43041
ILMN_1722726	ARHGAP32	7.78364	7.57777	0.0232783	7.70293
ILMN_1678781	ARHGAP33	9.54637	9.07447	3.79964e-09	9.36135
ILMN_1658145	ARHGAP35	6.61305	6.5932	0.447383	6.60526
ILMN_1696845	ARHGAP35	6.4426	6.42203	0.446819	6.43453
ILMN_1687362	ARHGAP35	6.27679	6.22296	0.0219247	6.25569
ILMN_1705466	ARHGAP36	6.42308	6.40146	0.216996	6.4146
ILMN_1776826	ARHGAP42	6.73814	6.80659	0.0197687	6.76498
ILMN_1716991	ARHGAP42	6.69422	6.67533	0.336411	6.68682
ILMN_3257145	ARHGAP42	6.2989	6.34727	0.0246492	6.31787
ILMN_2065022	ARHGAP44	6.61322	6.65282	0.410447	6.62875
ILMN_3245564	ARHGAP44	6.46064	6.49705	0.554362	6.47492
ILMN_1811392	ARHGAP45	9.25759	9.44864	0.0159287	9.33249
ILMN_2322747	ARHGAP5	7.48675	7.59514	0.430913	7.52925
ILMN_1732641	ARHGAP6	6.67207	6.70628	0.187602	6.68549
ILMN_2388746	ARHGAP6	6.55339	6.5952	0.0337394	6.56978
ILMN_1673358	ARHGAP6	6.55053	6.59882	0.0669678	6.56947
ILMN_1806655	ARHGAP6	6.55727	6.55724	0.998686	6.55726
ILMN_1663916	ARHGAP9	10.8838	10.9713	0.243323	10.9181
ILMN_2382657	ARHGAP9	9.87923	9.806	0.433431	9.85051
ILMN_1734742	ARHGDIA	10.315	10.3825	0.233983	10.3415
ILMN_3236935	ARHGDIA	8.19205	8.31057	0.0311849	8.23851
ILMN_1678143	ARHGDIB	14.1762	14.1773	0.985388	14.1767
ILMN_1711278	ARHGDIG	6.86791	6.8322	0.0845594	6.85391
ILMN_2049274	ARHGDIG	6.21934	6.2204	0.95931	6.21976
ILMN_1772370	ARHGEF1	9.01129	8.99138	0.816479	9.00348
ILMN_2405129	ARHGEF1	8.93123	8.92641	0.94503	8.92934
ILMN_2293131	ARHGEF1	6.65567	6.63261	0.209179	6.64663
ILMN_2132809	ARHGEF10	6.96108	6.94572	0.833877	6.95505
ILMN_1689770	ARHGEF10L	6.85436	6.90692	0.0179035	6.87496
ILMN_2389445	ARHGEF10L	6.55164	6.6063	0.138385	6.57307
ILMN_1727205	ARHGEF10L	6.53546	6.55453	0.569742	6.54294
ILMN_1733861	ARHGEF11	6.8001	6.96223	0.00740611	6.86366
ILMN_2347380	ARHGEF11	6.5693	6.728	0.0181116	6.63152
ILMN_1656546	ARHGEF11	6.4662	6.47073	0.805157	6.46798
ILMN_1810712	ARHGEF12	6.76388	7.05749	1.6221e-05	6.87899
ILMN_1792571	ARHGEF15	6.20408	6.19396	0.59561	6.20011
ILMN_1669928	ARHGEF16	6.2511	6.20382	0.0371161	6.23257
ILMN_1754562	ARHGEF17	7.38261	6.85036	5.36788e-10	7.17393
ILMN_1664016	ARHGEF18	11.1107	11.0577	0.482334	11.0899
ILMN_1808999	ARHGEF19	8.22323	7.84184	5.69187e-08	8.0737
ILMN_1703477	ARHGEF2	12.5572	12.457	0.0466728	12.5179
ILMN_1741027	ARHGEF25	6.68652	6.70369	0.376274	6.69325
ILMN_1651536	ARHGEF25	6.24604	6.26775	0.227426	6.25455
ILMN_2388965	ARHGEF25	6.18678	6.1156	0.00535034	6.15887
ILMN_1773042	ARHGEF26	6.37991	6.37218	0.708884	6.37688
ILMN_1652609	ARHGEF28	6.36028	6.38273	0.213748	6.36908
ILMN_1660036	ARHGEF28	6.34564	6.37729	0.203416	6.35805
ILMN_2281186	ARHGEF28	6.2247	6.16863	0.00550489	6.20272
ILMN_1807467	ARHGEF28	6.08742	6.07023	0.433491	6.08068
ILMN_1781010	ARHGEF3	10.13	10.328	0.0895031	10.2076
ILMN_1868265	ARHGEF33	6.51585	6.51286	0.861244	6.51467
ILMN_1795300	ARHGEF37	6.73434	7.05785	2.01748e-06	6.86118
ILMN_2179915	ARHGEF38	6.59379	6.56596	0.138139	6.58288
ILMN_1681221	ARHGEF39	6.78711	6.78575	0.966609	6.78658
ILMN_1717403	ARHGEF39	6.70698	6.779	0.0415371	6.73522
ILMN_1667405	ARHGEF39	6.69813	6.76924	0.0113026	6.72601
ILMN_3251418	ARHGEF39	6.60259	6.65821	0.0490561	6.6244
ILMN_3225795	ARHGEF4	6.32269	6.31407	0.675771	6.31931
ILMN_2342282	ARHGEF4	6.07034	6.04269	0.146516	6.0595
ILMN_1666076	ARHGEF4	6.04567	6.06949	0.211216	6.05501
ILMN_1705743	ARHGEF40	7.26055	7.17661	0.0525202	7.22764
ILMN_1803423	ARHGEF6	11.7415	11.3725	1.24851e-05	11.5968
ILMN_1796912	ARHGEF7	9.66544	9.62408	0.508498	9.64923
ILMN_1675984	ARHGEF7	6.7364	6.70672	0.248631	6.72477
ILMN_1798587	ARHGEF7	6.60204	6.61584	0.5184	6.60745
ILMN_2235679	ARHGEF7	6.12383	6.1012	0.232922	6.11496
ILMN_1779370	ARHGEF9	6.96946	6.96015	0.697386	6.96581
ILMN_1797341	ARID1A	10.2989	10.3263	0.538977	10.3096
ILMN_1734496	ARID1A	6.20843	6.18421	0.154231	6.19894
ILMN_1719694	ARID1B	9.28505	9.15304	0.115173	9.2333
ILMN_1723094	ARID1B	6.92562	6.9768	0.0476272	6.94569
ILMN_1660433	ARID1B	6.71813	6.73231	0.446033	6.72369
ILMN_2415357	ARID1B	6.56104	6.53194	0.134767	6.54963
ILMN_1699967	ARID1B	6.49184	6.49321	0.939793	6.49237
ILMN_1795247	ARID2	7.7517	7.60639	0.0118172	7.69473
ILMN_2182335	ARID2	7.70348	7.45591	7.75119e-07	7.60642
ILMN_1670130	ARID3A	9.34673	9.48637	0.0726807	9.40148
ILMN_1696956	ARID3B	8.76847	8.84914	0.308825	8.8001
ILMN_1757626	ARID3C	6.64951	6.67777	0.192228	6.66059
ILMN_1810229	ARID4A	8.15247	8.19704	0.251403	8.16994
ILMN_1676626	ARID4A	7.29204	7.3167	0.513139	7.30171
ILMN_2338447	ARID4A	7.20016	7.25411	0.274861	7.22131
ILMN_2269564	ARID4B	9.2795	9.32206	0.569962	9.29619
ILMN_1661485	ARID4B	8.91498	8.81475	0.0809391	8.87569
ILMN_2362982	ARID4B	8.81628	8.88058	0.331484	8.84149
ILMN_1761334	ARID4B	7.15447	7.1981	0.389375	7.17158
ILMN_2415157	ARID5A	7.13304	7.03945	0.0890124	7.09635
ILMN_1689700	ARID5A	6.95064	6.78189	0.000344732	6.88448
ILMN_2298567	ARID5A	6.66302	6.62892	0.214343	6.64965
ILMN_1721626	ARID5B	8.28689	8.46609	0.14506	8.35715
ILMN_1694219	ARIH1	8.04378	8.20556	0.00021387	8.10721
ILMN_1792825	ARIH2	10.0587	10.0098	0.296925	10.0395
ILMN_3241670	ARIH2OS	8.05035	7.90182	0.00560677	7.99211
ILMN_1813091	ARL1	8.83545	8.57982	3.01536e-07	8.73522
ILMN_1769168	ARL10	6.338	6.32408	0.449958	6.33254
ILMN_1808383	ARL11	6.81116	6.80903	0.950385	6.81032
ILMN_1777550	ARL13A	6.5965	6.62186	0.198922	6.60644
ILMN_2403047	ARL13B	6.85212	6.83997	0.56615	6.84735
ILMN_1777301	ARL13B	6.16266	6.11214	0.0279273	6.14285
ILMN_2232463	ARL14	6.21571	6.25898	0.0439186	6.23268
ILMN_1767642	ARL14EP	8.7916	8.59298	0.0016751	8.71373
ILMN_1702960	ARL14EPL	6.46047	6.4468	0.487135	6.45511
ILMN_1774161	ARL15	7.28369	7.40663	0.000692411	7.33189
ILMN_2202967	ARL15	6.95223	7.09489	7.80432e-06	7.00816
ILMN_2188119	ARL16	12.882	12.8993	0.841937	12.8887
ILMN_1679917	ARL16	8.51663	8.42098	0.081743	8.47913
ILMN_3231952	ARL17A	7.84115	7.80292	0.510733	7.82616
ILMN_1698680	ARL17A	7.62511	7.63785	0.840411	7.63011
ILMN_3181503	ARL17A	6.70371	6.73392	0.124336	6.71555
ILMN_1787879	ARL2	10.4925	10.4149	0.30746	10.4621
ILMN_1755391	ARL2BP	10.1122	10.0506	0.205769	10.0881
ILMN_1780444	ARL3	6.78053	6.67809	0.000960402	6.74037
ILMN_1775405	ARL4A	8.90383	9.39401	0.0060903	9.09602
ILMN_1743241	ARL4A	8.68167	9.02608	0.00469324	8.8167
ILMN_1704842	ARL4A	7.79226	7.912	0.26567	7.83921
ILMN_1753663	ARL4A	6.67709	6.74957	0.171495	6.70551
ILMN_2369953	ARL4A	6.63331	6.74212	0.0852436	6.67597
ILMN_1768391	ARL4C	6.67512	6.7823	0.130708	6.71714
ILMN_1719010	ARL4D	6.82057	6.84389	0.319804	6.82972
ILMN_1688526	ARL5A	11.5635	11.6983	0.0123228	11.6164
ILMN_2332558	ARL5A	9.30439	9.38386	0.131011	9.33555
ILMN_1771738	ARL5A	7.33625	7.41587	0.0994942	7.36747
ILMN_2120022	ARL5B	7.15302	7.18814	0.329073	7.16679
ILMN_1680465	ARL5B	6.78776	6.80643	0.497461	6.79508
ILMN_1679295	ARL5C	6.71398	6.69775	0.560443	6.70762
ILMN_3290699	ARL5C	6.43458	6.42811	0.762468	6.43204
ILMN_1771822	ARL6	6.60507	6.60255	0.898478	6.60408
ILMN_1750488	ARL6	6.26792	6.2589	0.592174	6.26439
ILMN_2307266	ARL6	6.23752	6.18138	0.00158735	6.21551
ILMN_1703325	ARL6	6.09911	6.08121	0.364434	6.09209
ILMN_1708416	ARL6IP1	11.0183	11.1793	0.0951577	11.0814
ILMN_2113362	ARL6IP1	6.53613	6.5688	0.203883	6.54894
ILMN_2393144	ARL6IP4	9.92924	9.87139	0.359583	9.90656
ILMN_1791149	ARL6IP4	8.72855	8.7457	0.755084	8.73528
ILMN_1779835	ARL6IP4	6.86496	6.72857	0.00115178	6.81149
ILMN_1769810	ARL6IP5	12.6279	12.3385	7.84284e-05	12.5144
ILMN_1797964	ARL6IP6	9.08335	9.14535	0.448409	9.10766
ILMN_2117902	ARL6IP6	6.54392	6.59146	0.0467755	6.56256
ILMN_1659148	ARL8A	6.44098	6.44013	0.968695	6.44065
ILMN_1752837	ARL8B	9.82429	9.63988	0.00166024	9.75199
ILMN_1777691	ARL9	6.58458	6.43014	0.00814217	6.52403
ILMN_1722066	ARMC1	8.69939	8.76218	0.17184	8.72401
ILMN_2052598	ARMC10	9.30328	9.1571	0.0364679	9.24597
ILMN_1689296	ARMC10	7.50196	7.50635	0.917881	7.50368
ILMN_1784535	ARMC10	6.61063	6.65879	0.0397696	6.62951
ILMN_1712616	ARMC12	6.90272	6.83337	0.0722475	6.87553
ILMN_1779256	ARMC2	6.99567	6.93067	0.00858725	6.97018
ILMN_2213008	ARMC2	6.25752	6.23356	0.260405	6.24813
ILMN_3243057	ARMC3	6.28307	6.28222	0.964353	6.28274
ILMN_1776395	ARMC4	6.36456	6.31741	0.0526732	6.34608
ILMN_1697088	ARMC5	7.93942	7.5123	3.66275e-08	7.77196
ILMN_1697118	ARMC6	7.93856	7.8096	0.00261967	7.888
ILMN_1797298	ARMC7	8.28708	7.94087	1.04226e-05	8.15134
ILMN_1781151	ARMC8	7.72656	7.95505	0.000939308	7.81614
ILMN_1797453	ARMC8	6.78764	6.82345	0.257328	6.80168
ILMN_2385318	ARMC8	6.65047	6.68309	0.320639	6.66326
ILMN_1656557	ARMC8	6.63772	6.62154	0.505965	6.63138
ILMN_1667867	ARMC8	6.6013	6.63861	0.103303	6.61593
ILMN_1755732	ARMC9	6.48421	6.45858	0.308009	6.47416
ILMN_1815490	ARMC9	6.40454	6.43139	0.227793	6.41507
ILMN_1788192	ARMCX1	8.19301	7.39192	8.3602e-13	7.87892
ILMN_2180677	ARMCX1	6.91346	6.64073	5.40683e-10	6.80653
ILMN_1785170	ARMCX2	6.90439	6.9954	0.365918	6.94008
ILMN_2334760	ARMCX3	7.94166	7.70592	0.00433505	7.84923
ILMN_2334765	ARMCX3	7.15962	7.05691	0.0615447	7.11935
ILMN_1651741	ARMCX3	6.64999	6.72412	0.00914047	6.67906
ILMN_1743345	ARMCX4	7.17447	7.13719	0.311995	7.15986
ILMN_3200560	ARMCX4	6.50594	6.44614	0.00157069	6.48249
ILMN_1741156	ARMCX5	7.63909	7.48911	0.00013557	7.58029
ILMN_1708131	ARMCX5-GPRASP2	6.82912	6.72875	0.00237571	6.78977
ILMN_1716026	ARMCX6	8.88468	8.6336	0.00033808	8.78624
ILMN_2414533	ARMCX6	8.66195	8.49399	8.92843e-06	8.5961
ILMN_1674334	ARMCX6	7.13337	7.0178	0.0078922	7.08806
ILMN_1768226	ARMCX6	6.9313	6.92154	0.7148	6.92747
ILMN_3249571	ARMS2	6.47917	6.50428	0.158436	6.48902
ILMN_1798108	ARMT1	7.16144	7.18687	0.553544	7.17141
ILMN_2186678	ARMT1	6.60886	6.62954	0.507362	6.61697
ILMN_2347314	ARNT	7.25594	7.21998	0.388256	7.24184
ILMN_1762582	ARNT	7.18412	7.10716	0.169426	7.15395
ILMN_1718046	ARNT2	6.63963	6.64812	0.748199	6.64296
ILMN_2405305	ARNTL	6.97758	7.44801	2.54966e-07	7.16202
ILMN_1731476	ARNTL	6.54001	6.53289	0.772001	6.53722
ILMN_1798064	ARNTL2	6.52708	6.47968	0.0267833	6.50849
ILMN_1759915	ARPC1A	9.8858	9.94484	0.286144	9.90895
ILMN_2085760	ARPC1B	10.0818	10.0497	0.823987	10.0692
ILMN_1792489	ARPC2	13.0516	13.0961	0.409639	13.0691
ILMN_1810200	ARPC2	6.90543	6.91653	0.610352	6.90979
ILMN_2255021	ARPC2	6.42432	6.39474	0.410696	6.41273
ILMN_1655561	ARPC3	12.4882	12.5125	0.729193	12.4977
ILMN_1707336	ARPC4	10.5349	10.8398	6.18181e-06	10.6545
ILMN_1803183	ARPC4	6.61225	6.58547	0.266437	6.60175
ILMN_2393763	ARPC4-TTLL3	9.89448	10.0748	0.048804	9.96519
ILMN_1682818	ARPC4-TTLL3	8.93857	8.71209	0.00924335	8.84977
ILMN_1768394	ARPC5	11.2865	11.5989	0.000420575	11.409
ILMN_2043816	ARPC5L	8.83494	9.03389	9.30508e-05	8.91294
ILMN_3265143	ARPIN	9.24593	9.39864	0.0808012	9.3058
ILMN_2189406	ARPIN	6.56846	6.64906	0.0108852	6.60006
ILMN_1651435	ARPIN	6.39286	6.41729	0.183228	6.40244
ILMN_2059505	ARPP19	9.13474	8.99988	0.0466728	9.08186
ILMN_1772798	ARPP19	8.55403	8.35458	3.56716e-05	8.47583
ILMN_2289825	ARPP21	6.79675	6.9033	0.11078	6.83853
ILMN_1672161	ARPP21	6.58042	6.69902	0.045094	6.62692
ILMN_1671402	ARPP21	6.35543	6.46262	0.127003	6.39745
ILMN_2251505	ARPP21	6.38972	6.38957	0.995318	6.38966
ILMN_2374728	ARPP21	6.1528	6.26997	0.115179	6.19874
ILMN_1660126	ARR3	6.48016	6.51499	0.131631	6.49381
ILMN_2325168	ARRB1	9.08575	8.98713	0.217346	9.04709
ILMN_1730620	ARRB1	8.92605	8.95068	0.674575	8.9357
ILMN_2395711	ARRB2	7.93327	8.3248	0.00038708	8.08678
ILMN_1675866	ARRB2	6.68647	6.71774	0.340804	6.69873
ILMN_1661492	ARRDC1	7.32296	7.17432	0.00848239	7.26468
ILMN_1799320	ARRDC1-AS1	7.38801	7.36686	0.655213	7.37972
ILMN_1655612	ARRDC2	8.83564	8.98311	0.0671643	8.89346
ILMN_1715181	ARRDC2	7.25689	7.2983	0.353635	7.27312
ILMN_1710229	ARRDC2	6.4894	6.51027	0.419025	6.49758
ILMN_2198515	ARRDC3	8.23686	8.2706	0.701975	8.25009
ILMN_2198516	ARRDC3	6.739	6.77314	0.426157	6.75238
ILMN_3235196	ARRDC3-AS1	7.37668	7.53679	1.66626e-07	7.43946
ILMN_3249553	ARRDC3-AS1	6.76683	6.74024	0.22547	6.7564
ILMN_3245495	ARRDC3-AS1	6.71131	6.69763	0.555978	6.70595
ILMN_1660544	ARRDC4	7.76818	7.52523	0.000550848	7.67293
ILMN_2153787	ARRDC5	8.22657	8.14593	0.351975	8.19495
ILMN_2047240	ARSA	7.95138	8.20755	0.00201642	8.05182
ILMN_1656477	ARSA	7.57664	7.67193	0.168645	7.614
ILMN_1712587	ARSB	6.94391	7.06886	0.00250828	6.9929
ILMN_1722045	ARSB	6.85654	6.93033	0.033503	6.88547
ILMN_1668727	ARSB	6.48721	6.53912	0.0162052	6.50756
ILMN_1684873	ARSD	10.1473	9.327	1.17562e-12	9.8257
ILMN_1684956	ARSD	7.15686	6.85509	9.0224e-08	7.03855
ILMN_1661624	ARSD	6.82037	6.84047	0.350465	6.82825
ILMN_1727462	ARSE	6.09167	6.03615	0.0121478	6.0699
ILMN_1664001	ARSF	6.27051	6.26042	0.629293	6.26655
ILMN_1720604	ARSG	6.6244	6.79291	7.34744e-05	6.69047
ILMN_1757896	ARSH	6.46727	6.45211	0.343288	6.46132
ILMN_1727156	ARSI	6.12855	6.09806	0.133297	6.1166
ILMN_1679318	ARSJ	6.66052	6.70643	0.0338165	6.67852
ILMN_1657050	ARSK	7.02292	6.93253	0.00339827	6.98748
ILMN_1807913	ART1	6.86106	6.85774	0.901952	6.85976
ILMN_1693218	ART3	6.37633	6.28018	0.115865	6.33863
ILMN_1805773	ART4	6.7014	6.99787	5.58467e-05	6.81764
ILMN_2338733	ART5	6.27741	6.29584	0.428101	6.28464
ILMN_1733583	ART5	6.11206	6.08643	0.144316	6.10201
ILMN_1803691	ARTN	7.35917	6.89659	0.000486299	7.17781
ILMN_1773295	ARTN	6.40148	6.51893	0.0312929	6.44753
ILMN_1727040	ARTN	6.35727	6.30201	0.0376974	6.33561
ILMN_1762952	ARTN	6.2463	6.13214	0.00898343	6.20154
ILMN_1800935	ARV1	8.94051	8.8966	0.426127	8.9233
ILMN_1677226	ARVCF	6.64415	6.50761	0.000242073	6.59061
ILMN_1724162	ARX	6.4863	6.47813	0.695998	6.4831
ILMN_1771732	AS3MT	6.72362	6.818	1.07188e-06	6.76062
ILMN_1684054	ASAH1	7.95667	8.17353	8.81931e-05	8.04169
ILMN_1655509	ASAH1	6.80064	6.91081	8.97258e-05	6.84384
ILMN_3242048	ASAH2	6.88983	6.95521	0.0117464	6.91546
ILMN_1780786	ASAH2	6.68967	6.70395	0.482845	6.69527
ILMN_1776129	ASAH2	6.65028	6.69072	0.0378532	6.66614
ILMN_1800237	ASAH2	6.59158	6.59923	0.688378	6.59458
ILMN_1658602	ASAH2	6.48998	6.50495	0.469243	6.49585
ILMN_1784206	ASAH2B	6.58075	6.61114	0.146243	6.59267
ILMN_1807078	ASAH2B	6.36295	6.38685	0.307775	6.37232
ILMN_2118773	ASAH2B	6.15725	6.15697	0.986916	6.15714
ILMN_3245057	ASAP1	9.50367	10.3204	2.59557e-11	9.8239
ILMN_1690963	ASAP1	8.75929	9.57023	2.77241e-12	9.07723
ILMN_2233366	ASAP1	7.66373	8.22523	1.04445e-09	7.88388
ILMN_3194508	ASAP2	7.91492	7.38973	1.95501e-06	7.70901
ILMN_1757237	ASAP2	7.77343	7.24908	3.67231e-06	7.56785
ILMN_3270972	ASAP2	7.08432	6.76433	7.23262e-06	6.95886
ILMN_1685441	ASAP3	6.75373	6.88828	0.00265234	6.80648
ILMN_1683096	ASB1	7.72807	7.819	0.228243	7.76372
ILMN_1781148	ASB10	6.56771	6.58097	0.467655	6.57291
ILMN_1651643	ASB11	6.62634	6.66261	0.147286	6.64056
ILMN_2272251	ASB11	6.56834	6.50959	0.0218369	6.54531
ILMN_1722024	ASB11	6.1419	6.16144	0.340851	6.14956
ILMN_1656364	ASB12	6.41647	6.34897	0.00066666	6.39001
ILMN_1654385	ASB13	8.06728	7.53024	7.56062e-11	7.85673
ILMN_1753737	ASB14	6.31694	6.238	0.000852672	6.28599
ILMN_1740528	ASB15	6.18731	6.20386	0.408418	6.1938
ILMN_1810881	ASB16	6.58574	6.65332	0.0683596	6.61224
ILMN_1676731	ASB16-AS1	7.33821	7.17897	0.000453832	7.27578
ILMN_1670829	ASB17	6.581	6.61945	0.0755991	6.59607
ILMN_2210101	ASB17	6.46563	6.4774	0.52996	6.47024
ILMN_1795811	ASB2	6.48087	6.4964	0.493729	6.48696
ILMN_2358784	ASB3	9.56068	9.35868	8.60244e-06	9.48148
ILMN_2358783	ASB3	8.19901	8.15795	0.307514	8.18291
ILMN_1699606	ASB3	7.77125	7.65969	0.0483151	7.72751
ILMN_1813668	ASB4	6.5229	6.54786	0.193692	6.53269
ILMN_1702618	ASB4	6.51657	6.50527	0.552332	6.51214
ILMN_1676066	ASB4	6.46514	6.46069	0.822289	6.4634
ILMN_1711269	ASB5	6.58142	6.59576	0.532878	6.58704
ILMN_2126055	ASB5	6.49868	6.48776	0.613569	6.4944
ILMN_1806705	ASB6	7.60837	7.70232	0.0685269	7.6452
ILMN_2397776	ASB6	7.25152	7.27702	0.612383	7.26152
ILMN_1655532	ASB6	6.22055	6.20694	0.62655	6.21521
ILMN_1680419	ASB7	7.3339	7.22467	0.0125393	7.29107
ILMN_1744050	ASB7	6.90803	6.81805	0.00393031	6.87275
ILMN_1753040	ASB7	6.7132	6.75182	0.26574	6.72834
[truncated: 42,000 more rows]
