# Supplementary material for: RBM17 Mediates Evasion of Pro-Leukemic Factors from Splicing-coupled NMD to Enforce Leukemic Stem Cell Maintenance
Source: Research Square preprint supplement (doi:10.21203/rs.3.rs-728533/v1), 2021-07-27
Supplement: Supplementary file 10 [file 497f5de0bd223f27d9130ab0.xlsx]

## Sheet: RBM17 eclip targets
Chr	start	end	log2FC_rep1	log2FC_rep2	strand	Ensembl ID	Gene ID	Binding region
chr12	62785444	62785491	3.47686	4.94805	+	ENSG00000135655.9	USP15	proxintron|47
chr16	842074	842120	5.06028	3.02482	+	ENSG00000127586.12	CHTF18	proxintron|46
chr9	131025195	131025238	4.20532	5.94547	-	ENSG00000167110.12	GOLGA2	5ss|26||proxintron|17
chr12	132239984	132240024	4.14557	4.28579	+	ENSG00000061936.5	SFSWAP	CDS|40
chr1	160209500	160209557	6.11745	3.18114	-	ENSG00000132716.14||ENSG00000258465.2	DCAF8	CDS|57
chr19	18547672	18547743	12.4922	3.58975	-	ENSG00000105655.14	ISYNA1	5ss|55||CDS|16
chr21	33064293	33064351	4.94193	5.22624	-	ENSG00000156304.10	SCAF4	proxintron|7||3ss|51
chr3	197024846	197024932	5.61991	4.07072	-	ENSG00000075711.16	DLG1	5ss|86
chr19	14522118	14522178	6.43275	5.49472	-	ENSG00000123136.10	DDX39A	proxintron|60
chr8	42176368	42176460	5.23959	3.25453	+	ENSG00000104365.9	IKBKB	proxintron|92
chr20	31041661	31041757	5.31269	4.85921	-	ENSG00000197183.8	C20orf112	proxintron|92||3ss|4
chr6	135502716	135502771	3.83993	4.43638	+	ENSG00000118513.14	MYB	5ss|55
chr16	1503529	1503622	3.19578	3.70083	-	ENSG00000103249.13	CLCN7	proxintron|93
chr2	61765109	61765142	6.93015	3.35662	-	ENSG00000082898.12	XPO1	5utr|33
chr2	61765078	61765109	3.71917	3.03419	-	ENSG00000082898.12	XPO1	5utr|31
chr11	47236846	47236924	5.31269	4.85921	+	ENSG00000134574.7	DDB2	5ss|69||proxintron|9
chr6	160209572	160209612	3.90672	3.66324	-	ENSG00000120438.7	TCP1	5ss|40
chr1	153788659	153788780	3.19578	3.26547	-	ENSG00000143614.7	GATAD2B	5ss|89||CDS|32
chr1	78414577	78414615	4.61518	3.52687	-	ENSG00000162613.12	FUBP1	CDS|23||3ss|15
chr13	113890526	113890591	6.33376	4.12201	+	ENSG00000139842.10	CUL4A	distintron|65
chr17	80016534	80016609	7.14648	3.67793	-	ENSG00000169718.13	DUS1L	CDS|75
chr9	128002125	128002161	5.23959	3.38913	-	ENSG00000044574.7	HSPA5	proxintron|36
chr3	156869974	156869982	3.11651	4.3933	-	ENSG00000163660.7	CCNL1	CDS|8
chr1	155658123	155658191	3.53224	3.73234	-	ENSG00000163374.15	YY1AP1	CDS|68
chr4	103748373	103748464	9.61355	5.49653	-	ENSG00000109332.15	UBE2D3	proxintron|91
chr17	7125641	7125713	9.38952	3.39638	+	ENSG00000072778.15	ACADVL	5ss|72
chr22	22319655	22319702	7.10791	3.1746	-	ENSG00000100038.15	TOP3B	5ss|1||CDS|46
chr4	1741890	1741972	3.83993	5.21833	+	ENSG00000218422.2	AC016773.1	noncoding_exon|82
chr14	103801380	103801470	12.361	4.51626	+	ENSG00000100664.6	EIF5	5utr|90
chr20	57564366	57564458	12.2151	5.12954	+	ENSG00000101158.8	NELFCD	proxintron|76||3ss|16
chrX	48674285	48674371	7.05406	4.34006	+	ENSG00000094631.14	HDAC6	CDS|81||3ss|5
chr5	132095632	132095685	4.89143	3.1829	-	ENSG00000164402.9	2020-09-08	distintron|53
chr2	152684501	152684564	3.83993	4.62804	-	ENSG00000162980.12	ARL5A	5ss|20||proxintron|43
chr16	2810043	2810144	25.0883	3.75714	+	ENSG00000167978.12	SRRM2	proxintron|101
chr19	54971796	54971864	35.8271	3.48833	+	ENSG00000167615.12	LENG8	3utr|68
chr14	23793766	23793840	7.04552	3.7482	+	ENSG00000100836.6	PABPN1	3utr|74
chr1	35656639	35656692	8.24174	3.4946	-	ENSG00000116560.6	SFPQ	3ss|53
chr1	19433194	19433214	4.07023	3.16281	-	ENSG00000127481.10	UBR4	CDS|20
chr15	89836172	89836206	4.96253	3.27134	+	ENSG00000140525.13	FANCI	CDS|34
chr19	36114359	36114412	3.11651	4.16704	+	ENSG00000249115.4	HAUS5	3utr|53
chr12	56716665	56716793	5.23959	3.95508	-	ENSG00000135473.10	PAN2	5ss|48||proxintron|80
chr17	73238190	73238240	4.21715	3.73924	-	ENSG00000125447.12	GGA3	proxintron|50
chr7	26239146	26239173	18.465	4.54491	-	ENSG00000122566.16	HNRNPA2B1	distintron|27
chr1	35647662	35647707	5.72906	3.86051	-	lncRNA|lnc-SFPQ-2	lnc-SFPQ-2	noncoding_exon|45
chr11	61644702	61644758	3.87305	3.60772	-	ENSG00000221968.4	FADS3	proxintron|56
chr1	182825556	182825612	3.87305	4.38071	+	ENSG00000135829.12	DHX9	proxintron|10||3ss|46
chr22	22043576	22043616	6.11745	3.15749	+	ENSG00000100023.13	PPIL2	proxintron|40
chr6	43745440	43745522	12.65	3.19303	+	ENSG00000112715.16	VEGFA	5ss|63||proxintron|19
chr20	42087254	42087304	7.7227	4.41246	+	ENSG00000124193.10	SRSF6	proxintron|50
chr20	42087202	42087254	8.1482	3.85385	+	ENSG00000124193.10	SRSF6	5ss|48||proxintron|4
chr21	44515401	44515449	4.89143	3.2199	-	ENSG00000160201.7	U2AF1	5ss|2||proxintron|46
chr17	56084099	56084174	17.9473	5.72088	-	ENSG00000136450.8	SRSF1	proxintron|75
chr1	16053558	16053627	4.07023	3.0706	+	ENSG00000116786.7	PLEKHM2	CDS|69
chr14	103801170	103801231	3.47686	4.51551	+	ENSG00000100664.6	EIF5	5ss|23||5utr|38
chr5	10401819	10401888	10.3423	3.24499	+	ENSG00000145495.10	2020-03-06	proxintron|69
chr4	83275325	83275366	6.77835	3.11337	-	ENSG00000138668.14	HNRNPD	3ss|41
chrX	48434114	48434170	5.60585	3.37397	+	ENSG00000102317.13	RBM3	5utr|56
chr2	220099926	220099989	4.56417	3.6439	+	ENSG00000163516.9	ANKZF1	CDS|63
chr12	57905941	57906004	15.5613	4.40562	+	MI0022603	hsa-mir-6758	miRNA_proximal|34||5ss|12||3ss|17
chr12	54677075	54677100	8.14454	5.01726	+	ENSG00000135486.13	HNRNPA1	5ss|25
chr16	1502159	1502230	7.77985	4.69268	-	ENSG00000103249.13	CLCN7	proxintron|59||distintron|12
chr22	20079568	20079644	7.14648	3.77425	+	ENSG00000128191.9	DGCR8	5ss|26||proxintron|50
chr3	195710992	195711072	5.72906	3.37709	-	ENSG00000185485.10||lncRNA|lnc-TFRC-7	lnc-TFRC-7|SDHAP1	noncoding_exon|80
chr3	42672099	42672159	8.55597	3.56615	+	ENSG00000114857.13	NKTR	5ss|60
chr3	156874853	156874904	3.53442	3.30834	-	ENSG00000163660.7	CCNL1	CDS|20||3ss|31
chr3	10103833	10103895	7.02132	3.74305	+	ENSG00000144554.6	FANCD2	CDS|61||3ss|1
chr1	19450552	19450619	3.47686	4.34155	-	ENSG00000127481.10	UBR4	proxintron|67
chr16	85696108	85696167	7.05406	4.04757	+	ENSG00000131149.13	GSE1	proxintron|59
chr5	65458279	65458338	4.33478	3.13004	+	ENSG00000153914.11	SREK1	CDS|59
chr9	126692173	126692280	4.14557	4.42585	-	ENSG00000119522.11	DENND1A	CDS|31||5utr|76
chr22	22319702	22319747	5.58932	3.03856	-	ENSG00000100038.15	TOP3B	CDS|45
chr2	38976562	38976617	5.06028	3.16133	-	ENSG00000115875.14	SRSF7	5ss|47||proxintron|8
chr10	6150561	6150647	3.7815	3.14737	+	ENSG00000134453.11	RBM17	3ss|86
chr16	2809957	2809976	33.9025	4.76455	+	ENSG00000167978.12	SRRM2	proxintron|19
chr16	2809910	2809957	32.9268	3.85805	+	ENSG00000167978.12	SRRM2	proxintron|47
chr14	103802621	103802677	4.21715	4.11286	+	ENSG00000100664.6	EIF5	proxintron|56
chr10	121336375	121336429	5.98231	3.78865	-	ENSG00000151923.13	TIAL1	proxintron|54
chr15	91446215	91446255	7.94014	5.77729	+	ENSG00000196547.10	MAN2A2	noncoding_5ss|6||5utr|34
chr15	91446255	91446327	7.7227	4.48195	+	ENSG00000196547.10	MAN2A2	5utr|72
chr8	145739762	145739800	3.47686	4.51551	-	ENSG00000160957.8	RECQL4	5ss|15||3ss|23
chr16	22337655	22337700	4.73795	4.59104	+	ENSG00000058600.11	POLR3E	5ss|45
chr7	100284275	100284355	4.53378	3.3173	-	ENSG00000146830.9	GIGYF1	CDS|80
chr7	129098113	129098209	12.2865	4.06692	+	ENSG00000128578.5	STRIP2	CDS|96
chr6	99855958	99856036	6.49681	3.51238	-	ENSG00000132424.10	PNISR	CDS|78
chr17	73774823	73774877	16.0242	4.17083	-	ENSG00000132475.4	H3F3B	CDS|54
chr1	235491376	235491466	3.13405	3.04869	-	ENSG00000054267.16	ARID4B	5utr|90
chr3	42660519	42660525	3.87305	3.68947	+	ENSG00000114857.13	NKTR	CDS|6
chr6	160209856	160209914	8.41397	4.42386	-	ENSG00000120438.7	TCP1	proxintron|13||5utr|45
chr17	80441974	80442104	6.70786	3.86573	+	ENSG00000141562.13	NARF	proxintron|130
chr15	23298736	23298822	5.61991	4.13004	-	ENSG00000140181.10||lncRNA|lnc-GOLGA6L22-4	HERC2P2|lnc-GOLGA6L22-4	noncoding_proxintron|86
chr19	47231876	47231957	4.03208	3.18021	-	ENSG00000090372.10	STRN4	CDS|81
chr17	73236753	73236816	3.87305	3.60772	-	ENSG00000125447.12	GGA3	5ss|24||proxintron|39
chr7	75045158	75045216	3.84989	4.83556	+	ENSG00000223705.5	NSUN5P1	noncoding_exon|58
chrX	70517530	70517581	5.97596	4.25621	+	ENSG00000147140.11	NONO	proxintron|51
chr1	39917898	39917976	5.68483	4.87929	+	ENSG00000127603.19	MACF1	CDS|78
chr12	62785173	62785238	3.94154	3.5644	+	ENSG00000135655.9	USP15	5ss|28||CDS|37
chr12	56510791	56510817	8.78559	3.96373	+	ENSG00000229117.4	RPL41	proxintron|26
chrX	13332117	13332171	12.9638	3.68231	+	lncRNA|LINC01203	LINC01203	noncoding_exon|54
chr22	22047860	22047964	7.47441	3.06626	+	ENSG00000100023.13	PPIL2	proxintron|104
chr3	42660700	42660775	8.96313	3.28508	+	ENSG00000114857.13	NKTR	5ss|20||proxintron|55
chrX	47085573	47085643	3.47686	4.63403	+	ENSG00000102225.11	CDK16	proxintron|4||3ss|66
chrX	47085519	47085573	3.19578	3.12982	+	ENSG00000102225.11	CDK16	5ss|8||proxintron|46
chr5	179049913	179049917	9.85946	4.19679	-	ENSG00000169045.13	HNRNPH1	proxintron|4
chr19	1430072	1430168	4.21715	3.76455	+	ENSG00000071626.12	DAZAP1	5ss|24||proxintron|24||3ss|48
chr21	34942063	34942149	6.21783	5.1439	+	ENSG00000159140.13	SON	distintron|86
chr12	56572262	56572335	7.4011	4.21478	-	ENSG00000139613.7	SMARCC2	CDS|57||3ss|16
chr19	10468678	10468706	5.68483	4.80329	-	ENSG00000105397.9	TYK2	CDS|28
chr7	97498828	97498910	17.7353	3.64944	-	ENSG00000070669.12	ASNS	proxintron|82
chr1	223945951	223945998	3.83993	4.25956	+	ENSG00000162909.13	CAPN2	distintron|47
chr12	56748992	56749046	5.31269	4.54308	-	ENSG00000170581.9	STAT2	5ss|54
chr19	33134190	33134237	3.48958	3.48032	-	ENSG00000105186.10	ANKRD27	5ss|2||CDS|45
chr22	26239751	26239822	3.84989	4.45953	+	ENSG00000133454.11	MYO18B	CDS|71
chr11	109641821	109641836	3.84989	4.73924	-	lncRNA|lnc-RDX-1||ENSG00000254659.2	lnc-RDX-1|RP11-262A12.1	noncoding_distintron|15
chr11	109641815	109641819	3.84989	4.73924	-	lncRNA|lnc-RDX-1||ENSG00000254659.2	lnc-RDX-1|RP11-262A12.1	noncoding_distintron|4
chr2	198284355	198284376	3.87305	3.80799	-	ENSG00000115524.11	SF3B1	3utr|21
chr3	160130288	160130351	4.91381	4.13898	+	ENSG00000113810.11	SMC4	5ss|54||proxintron|9
chr11	57194480	57194505	3.83993	4.37076	-	ENSG00000134802.13	SLC43A3	5utr|25
chr2	38975576	38975639	5.61991	4.32801	-	ENSG00000115875.14	SRSF7	5ss|19||proxintron|44
chr16	85690802	85690880	7.7227	3.88773	+	ENSG00000131149.13	GSE1	3ss|78
chr2	113403740	113403803	6.05823	5.45572	+	ENSG00000144136.6	SLC20A1	5ss|63
chrX	48434429	48434497	6.68087	3.59391	+	ENSG00000102317.13	RBM3	5utr|68
chr11	17099067	17099104	4.07023	3.40553	-	ENSG00000110700.2	RPS13	5ss|10||3ss|27
chr14	23538516	23538594	10.1748	3.3965	-	ENSG00000100813.10	ACIN1	5ss|10||proxintron|68
chrX	48434308	48434366	8.0694	3.68578	+	ENSG00000102317.13	RBM3	5utr|58
chr6	161530458	161530510	5.5366	3.18763	+	ENSG00000085511.15	MAP3K4	proxintron|52
chr19	1418525	1418602	4.44165	4.58681	+	ENSG00000071626.12	DAZAP1	proxintron|39||3ss|38
chr1	12409345	12409411	4.56417	3.81111	+	ENSG00000048707.9	VPS13D	CDS|66
chr16	71954793	71954888	5.2658	4.74437	+	ENSG00000182149.16	IST1	5ss|33||proxintron|62
chr16	31198461	31198490	7.30292	3.3735	+	ENSG00000089280.14	FUS	proxintron|29
chr2	131967895	131967973	3.83993	4.55204	+	ENSG00000115762.12	PLEKHB2	distintron|78
chr1	26799717	26799787	13.0531	4.29433	+	ENSG00000198830.6	HMGN2	proxintron|70
chr14	31344507	31344577	5.61991	3.93507	+	ENSG00000100473.11	COCH	proxintron|70
chr12	133244090	133244141	4.57274	4.48195	-	ENSG00000177084.12	POLE	CDS|51
chr22	22042361	22042395	6.20552	3.99653	+	ENSG00000100023.13	PPIL2	CDS|34
chr8	20069307	20069384	3.47686	4.79061	+	ENSG00000147416.6	ATP6V1B2	5ss|58||proxintron|19
chr2	54114773	54114847	4.94193	4.62804	-	ENSG00000068878.10	PSME4	proxintron|74
chr7	5569440	5569516	10.458	4.00804	-	ENSG00000075624.9	ACTB	5utr|76
chr6	47445700	47445869	5.3129	3.17999	+	ENSG00000198087.7	CD2AP	5utr|169
chr5	148929524	148929604	5.68483	4.77607	-	ENSG00000113712.12	CSNK1A1	5ss|67||proxintron|13
chr17	26910957	26910998	3.48958	3.44676	-	ENSG00000258472.4||ENSG00000076382.12	SPAG5|RP11-192H23.4	CDS|41
chr6	37138676	37138716	5.31703	3.48988	+	ENSG00000137193.9	PIM1	5ss|30||3ss|10
chr17	79803118	79803189	6.80829	4.92052	-	ENSG00000185624.10	P4HB	3ss|71
chr16	2809131	2809163	12.5822	3.1366	+	ENSG00000167978.12	SRRM2	CDS|23||3ss|9
chr3	9476390	9476467	20.7537	3.89874	+	ENSG00000168137.11	SETD5	proxintron|17||3ss|60
chr2	38978236	38978344	8.87076	3.63379	-	ENSG00000115875.14	SRSF7	5ss|74||proxintron|34
chr2	38978174	38978219	5.72906	3.37709	-	ENSG00000115875.14	SRSF7	proxintron|45
chr1	182358988	182359011	3.11651	4.70404	-	ENSG00000135821.12	GLUL	distintron|23
chr1	226054702	226054809	14.4464	4.16324	-	ENSG00000196187.7	TMEM63A	5ss|98||proxintron|9
chr17	45662974	45663108	4.35459	3.31111	+	ENSG00000141279.11	NPEPPS	5ss|41||CDS|93
chr11	14520907	14520995	6.80829	5.72186	-	ENSG00000129083.8||ENSG00000129084.13	PSMA1|COPB1	proxintron|88
chr17	7124258	7124324	7.70181	4.21301	+	ENSG00000072778.15	ACADVL	CDS|66
chr1	16054108	16054180	4.56417	3.85921	+	ENSG00000116786.7	PLEKHM2	CDS|72
chr10	70098363	70098484	16.2027	3.3785	+	ENSG00000096746.13	HNRNPH3	5ss|39||CDS|82
chr1	249151617	249151658	7.77985	4.52597	-	ENSG00000171163.11	ZNF692	CDS|41
chr1	1329021	1329059	3.73046	3.21833	-	ENSG00000221978.7	CCNL2	proxintron|38
chr11	62652867	62652904	4.57274	5.9285	+	ENSG00000168003.12	SLC3A2	5ss|16||3ss|21
chr7	2406470	2406540	8.96313	3.59104	+	ENSG00000106263.13	EIF3B	proxintron|63||3ss|7
chr8	103326030	103326068	3.7815	3.57445	-	ENSG00000104517.8	UBR5	5ss|1||CDS|37
chr17	79880890	79880957	5.2658	4.05204	-	ENSG00000197063.6	MAFG	CDS|44||3ss|23
chr1	39761457	39761488	4.57274	4.40976	+	ENSG00000127603.19	MACF1	CDS|30||3ss|1
chr3	156877853	156877928	6.33376	4.53172	-	ENSG00000163660.7	CCNL1	CDS|31||5utr|44
chr3	45730886	45730990	5.31891	3.84155	+	ENSG00000211456.6	SACM1L	CDS|33||5utr|71
chr6	147525865	147525927	5.06028	3.56855	+	ENSG00000164506.10	STXBP5	5ss|54||proxintron|8
chr1	182354790	182354842	11.24	3.60595	-	ENSG00000135821.12	GLUL	5ss|48||proxintron|2||3ss|2
chr10	75552030	75552131	13.0034	4.11183	+	ENSG00000214655.6	ZSWIM8	CDS|101
chr2	54197842	54197943	11.2176	4.19474	-	ENSG00000068878.10	PSME4	CDS|80||5utr|21
chr3	9475900	9475939	8.55597	3.54127	+	ENSG00000168137.11	SETD5	3ss|39
chr16	10480009	10480091	14.091	4.95572	+	lncRNA|lnc-ATF7IP2-3	lnc-ATF7IP2-3	noncoding_exon|82
chr17	7476576	7476613	4.94193	4.45953	+	ENSG00000161960.10	EIF4A1	5utr|37
chr3	9854760	9854795	3.87305	3.48195	+	ENSG00000250151.5||ENSG00000214021.11	TTLL3|ARPC4-TTLL3	CDS|35
chr8	103324706	103324714	3.19578	3.24456	-	ENSG00000104517.8	UBR5	CDS|8
chr2	178077943	178077982	5.5366	3.48011	+	MI0016787	hsa-mir-4444-1	miRNA_proximal|39
chr15	34679019	34679138	15.6759	3.82219	-	ENSG00000175265.13	GOLGA8A	CDS|107||5utr|12
chr1	245018448	245018466	3.87305	3.54757	-	ENSG00000153187.12	HNRNPU	proxintron|18
chr7	103002783	103002862	5.44852	3.38086	+	ENSG00000161057.6	PSMC2	proxintron|79
chrX	23802390	23802452	3.43083	3.31111	+	ENSG00000130066.12	SAT1	3utr|62
chr17	80146213	80146319	3.61727	3.71833	-	ENSG00000176155.14	CCDC57	CDS|83||3ss|23
chr2	178077738	178077749	4.21715	3.78901	+	MI0016787	hsa-mir-4444-1	miRNA_proximal|11
chr20	57568700	57568729	3.83993	4.62804	+	ENSG00000101158.8	NELFCD	CDS|29
chr4	174254572	174254593	4.91381	4.48011	-	ENSG00000164104.7	HMGB2	5ss|21
chrX	13346143	13346157	10.0884	3.21815	+	lncRNA|LINC01203	LINC01203	noncoding_exon|14
chr8	145666302	145666323	3.11651	3.99653	-	ENSG00000160949.12	TONSL	5ss|21
chr10	70092061	70092106	8.24174	4.19883	+	ENSG00000096746.13	HNRNPH3	5ss|13||proxintron|32
chr17	46052496	46052545	9.5872	3.56284	+	ENSG00000108465.10	CDK5RAP3	CDS|21||3ss|28
chr4	100870296	100870405	10.1574	4.35117	-	ENSG00000164032.7	H2AFZ	5ss|76||proxintron|33
chr11	61734248	61734320	4.74557	3.04449	-	ENSG00000167996.11	FTH1	proxintron|72
chr19	10270889	10270918	4.20532	4.46205	-	ENSG00000130816.10	DNMT1	proxintron|29
chr8	103299660	103299715	3.19517	3.75956	-	ENSG00000104517.8	UBR5	CDS|55
chr17	73775331	73775384	22.0705	6.06692	-	ENSG00000132475.4	H3F3B	proxintron|16||5utr|37
chr17	73775278	73775331	10.2195	4.63337	-	ENSG00000132475.4	H3F3B	5utr|53
chr1	67891752	67891801	4.35459	3.20404	-	ENSG00000142864.10	SERBP1	5ss|49
chr16	15230083	15230177	3.87305	3.85044	-	ENSG00000250251.2	PKD1P6	noncoding_3ss|6||noncoding_proxintron|88
chr17	38324015	38324095	4.21715	4.18578	+	ENSG00000108349.10	CASC3	3ss|80
chr22	19445505	19445565	3.19578	3.3618	-	ENSG00000070010.14	UFD1L	5ss|60
chr10	70515905	70515940	13.4466	3.43409	+	ENSG00000060339.9	CCAR1	proxintron|24||3ss|11
chr6	109702990	109703080	10.1348	3.92585	-	ENSG00000135535.10	CD164	proxintron|90
chr7	150763611	150763701	4.03208	3.03172	+	ENSG00000164889.8	SLC4A2	CDS|90
chr12	62785970	62785997	3.11651	4.44676	+	ENSG00000135655.9	USP15	3ss|27
chr15	50903134	50903225	5.23959	3.7728	-	ENSG00000092439.9	TRPM7	5ss|36||proxintron|55
chr3	49154032	49154153	6.69317	4.78176	-	ENSG00000172046.14	USP19	5ss|54||CDS|9||3ss|58
chr1	182359936	182360012	4.93957	3.4285	-	ENSG00000135821.12	GLUL	5utr|76
chr1	1327834	1327855	6.39837	3.23666	-	ENSG00000221978.7	CCNL2	3utr|21
chr11	126137695	126137758	4.91381	4.36717	-	ENSG00000182934.7	SRPR	proxintron|50||3ss|13
chr6	99857049	99857108	8.87076	3.61052	-	ENSG00000132424.10	PNISR	CDS|59
chr10	94450135	94450218	10.9866	5.84785	+	ENSG00000152804.6	HHEX	5ss|70||proxintron|13
chr16	279163	279248	17.3726	4.55924	-	ENSG00000007392.12	LUC7L	5ss|71||proxintron|14
chr16	279137	279163	4.73422	3.80486	-	ENSG00000007392.12	LUC7L	proxintron|26
chrX	153226843	153226904	3.43083	3.09525	-	ENSG00000172534.9	HCFC1	5ss|12||proxintron|49
chr22	22312175	22312197	3.83993	4.71833	-	ENSG00000100038.15	TOP3B	3utr|22
chr8	103297756	103297812	4.94193	4.73924	-	ENSG00000104517.8	UBR5	CDS|56
chr4	877319	877420	3.83993	4.92052	-	ENSG00000178950.12	GAK	proxintron|68||3ss|33
chr3	9475211	9475248	5.98231	3.5706	+	ENSG00000168137.11	SETD5	proxintron|37
chr3	186504750	186504847	9.79566	4.27953	+	MI0006383	hsa-mir-1248	miRNA_proximal|97
chr12	120221450	120221513	4.21715	3.78901	-	ENSG00000122966.9	CIT	proxintron|63
chr12	120221513	120221579	4.35459	3.25956	-	ENSG00000122966.9	CIT	proxintron|66
chr12	122613808	122613872	7.05406	4.04757	+	ENSG00000175727.9	MLXIP	5ss|64
chr22	22321974	22322008	9.45622	3.71833	-	ENSG00000100038.15	TOP3B	CDS|34
chr3	47883407	47883480	5.23959	3.19679	+	ENSG00000132153.10	DHX30	proxintron|73
chr3	156870913	156870953	4.33478	3.18486	-	ENSG00000163660.7	CCNL1	CDS|33||3ss|7
chr7	100282495	100282506	3.84989	4.42052	-	ENSG00000146830.9	GIGYF1	CDS|11
chr1	26799130	26799173	9.07847	5.64878	+	ENSG00000198830.6	HMGN2	5ss|43
chr1	26799179	26799279	15.714	5.30495	+	ENSG00000198830.6	HMGN2	5ss|40||proxintron|60
chr8	38876818	38876865	3.83993	4.43638	+	ENSG00000168615.7	ADAM9	proxintron|47
chr2	27257995	27258027	3.48958	3.20404	+	ENSG00000119777.14	TMEM214	CDS|25||3ss|7
chr21	47982990	47983082	5.75508	3.03437	+	ENSG00000160305.13	DIP2A	distintron|92
chr10	70231439	70231521	4.91381	3.65556	-	ENSG00000138346.10	DNA2	5ss|74||proxintron|8
chr11	2993984	2994037	3.7815	3.27425	-	ENSG00000205531.8	NAP1L4	proxintron|26||distintron|27
chr5	95297335	95297426	3.11651	4.36501	-	ENSG00000118985.10	ELL2	CDS|91
chr2	220097937	220097995	4.94193	4.59734	+	ENSG00000163516.9	ANKZF1	5ss|24||3ss|34
chr1	45223287	45223317	4.57274	4.68947	+	ENSG00000142945.8	KIF2C	CDS|30
chr11	129747194	129747244	4.94193	4.49653	-	ENSG00000170322.10	NFRKB	5ss|25||CDS|25
chr16	1796443	1796488	3.83993	4.57828	+	ENSG00000138834.8	MAPK8IP3	distintron|45
chr7	150768429	150768465	3.53224	3.4285	+	ENSG00000164889.8	SLC4A2	5ss|2||3ss|34
chr7	150768465	150768522	4.35459	3.31111	+	ENSG00000164889.8	SLC4A2	CDS|46||3ss|11
chr16	72138298	72138364	4.21715	3.68578	+	ENSG00000140829.7	DHX38	3ss|66
chr17	56084191	56084203	9.85946	4.76067	-	ENSG00000136450.8	SRSF1	proxintron|12
chr17	7127982	7128027	4.07023	3.38462	+	ENSG00000072778.15	ACADVL	CDS|45
chr13	92000447	92000527	6.93946	3.80799	+	lncRNA|MIR17HG	MIR17HG	noncoding_exon|80
chr9	128002842	128002910	17.8102	4.36754	-	ENSG00000044574.7	HSPA5	5ss|56||proxintron|12
chr19	10468567	10468593	4.61518	3.25659	-	ENSG00000105397.9	TYK2	CDS|26
chr7	158533898	158533979	4.21715	3.65749	-	ENSG00000117868.11	ESYT2	proxintron|81
chr11	61644090	61644171	5.44852	3.59618	-	ENSG00000221968.4	FADS3	3utr|72||CDS|9
chr19	18547918	18547994	8.24174	3.4946	-	ENSG00000105655.14	ISYNA1	5utr|76
chr5	170815616	170815644	4.56417	4.1439	+	ENSG00000181163.9	NPM1	distintron|28
chr22	21119871	21119903	8.76001	3.62804	-	ENSG00000241973.6	PI4KA	5ss|1||CDS|31
chr22	22043440	22043512	6.06257	3.0616	+	ENSG00000100023.13	PPIL2	proxintron|72
chr12	54675290	54675320	5.23959	3.56528	+	ENSG00000135486.13	HNRNPA1	5ss|30
chr1	68151620	68151691	4.91381	4.30329	+	ENSG00000116717.7	GADD45A	3ss|71
chr1	1254203	1254314	4.35459	3.6746	-	ENSG00000127054.14	CPSF3L	proxintron|111
chr3	197024590	197024665	5.59237	3.10772	-	ENSG00000075711.16	DLG1	proxintron|60||5utr|15
chr22	21159261	21159302	6.11745	3.20404	-	ENSG00000241973.6	PI4KA	CDS|41
chr21	44521257	44521302	10.9425	4.1439	-	ENSG00000160201.7	U2AF1	proxintron|45
chr1	46725873	46725960	5.07593	3.11836	+	ENSG00000085999.7	RAD54L	proxintron|87
chr1	12304634	12304668	3.47686	4.01551	+	ENSG00000048707.9	VPS13D	CDS|34
chr12	62954664	62954727	4.35459	3.40431	+	ENSG00000061987.10	MON2	CDS|63
chr7	26240077	26240172	26.253	3.84811	-	ENSG00000122566.16	HNRNPA2B1	5ss|81||proxintron|14
chr2	220099575	220099633	6.43275	4.88352	+	ENSG00000163516.9	ANKZF1	CDS|58
chr1	155658297	155658425	3.48958	3.55795	-	ENSG00000163374.15	YY1AP1	5ss|4||5utr|124
chr16	88789403	88789416	6.51267	4.96708	-	ENSG00000103335.15	PIEZO1	CDS|13
chr12	132195695	132195793	6.98881	3.1376	+	ENSG00000061936.5	SFSWAP	CDS|19||5utr|79
chr16	85698923	85698987	7.4825	3.79698	+	ENSG00000131149.13	GSE1	proxintron|64
chr19	806565	806616	4.21715	4.03172	+	ENSG00000011304.12	PTBP1	5ss|51
chr4	83349981	83350037	8.0694	4.04869	-	ENSG00000152795.13	HNRNPDL	proxintron|56
chrX	13347694	13347734	6.76455	3.02917	+	lncRNA|LINC01203||ENSG00000235592.1	GS1-600G8.4|LINC01203	noncoding_exon|40
chr1	113241113	113241197	4.96253	3.52584	+	ENSG00000155363.14	MOV10	5ss|84
chr21	44521303	44521359	5.97596	4.25621	-	ENSG00000160201.7	U2AF1	proxintron|56
chr21	44521359	44521398	7.72641	3.64732	-	ENSG00000160201.7	U2AF1	5ss|23||proxintron|16
chr17	74732799	74732857	11.7529	5.98928	-	MI0003651	hsa-mir-636	miRNA_proximal|58
chr11	70117128	70117199	3.87305	3.76289	+	ENSG00000131626.11	PPFIA1	proxintron|71
chr8	145668156	145668211	6.80829	4.92052	-	ENSG00000160949.12	TONSL	CDS|34||3ss|21
chr19	50360150	50360228	3.48958	3.29433	+	ENSG00000104960.11	PTOV1	3ss|78
chr21	33064578	33064644	5.68483	4.65556	-	ENSG00000156304.10	SCAF4	5ss|66
chr4	68295370	68295401	4.94193	5.46896	-	ENSG00000206629.1	RNU1-63P	noncoding_exon|31
chr10	72577404	72577408	45.7226	3.16244	+	lncRNA|lnc-ADAMTS14-1	lnc-ADAMTS14-1	noncoding_exon|4
chr7	129094285	129094363	6.50738	3.18888	+	ENSG00000128578.5	STRIP2	CDS|78
chr19	17690606	17690642	3.83993	4.29856	+	ENSG00000130309.6	COLGALT1	proxintron|36
chrX	153579534	153579589	4.69579	3.03096	-	ENSG00000196924.10	FLNA	proxintron|55
chr1	1325611	1325623	5.30001	3.52276	-	ENSG00000221978.7	CCNL2	CDS|12
chr10	70516126	70516152	7.37122	3.71202	+	ENSG00000060339.9	CCAR1	CDS|26
chr7	5569753	5569822	22.3207	5.73862	-	ENSG00000075624.9	ACTB	proxintron|69
chr7	5569822	5569894	16.7218	4.82825	-	ENSG00000075624.9	ACTB	proxintron|72
chr10	94452342	94452392	3.53224	3.58256	+	ENSG00000152804.6	HHEX	5ss|39||3ss|11
chr2	74754946	74754965	6.29344	3.49331	-	ENSG00000115307.12	AUP1	CDS|19
chr15	63930716	63930735	3.83993	4.52482	-	ENSG00000103657.9	HERC1	CDS|19
chr3	37291283	37291387	4.96253	3.44331	+	ENSG00000144674.12	GOLGA4	distintron|104
chr16	89836685	89836739	8.30491	4.33556	-	ENSG00000187741.10	FANCA	3ss|54
chr6	86352657	86352718	5.5366	3.16609	-	ENSG00000135316.13	SYNCRIP	5utr|61
chr16	2808979	2809046	12.8284	3.08152	+	ENSG00000167978.12	SRRM2	CDS|61||3ss|6
chr1	245026371	245026386	6.80829	5.47207	-	ENSG00000153187.12	HNRNPU	5utr|15
chr1	1254345	1254401	3.83993	4.57828	-	ENSG00000127054.14	CPSF3L	5ss|50||proxintron|6
chr16	88803339	88803405	5.61991	4.09104	-	ENSG00000103335.15	PIEZO1	proxintron|66
chr1	207940943	207940976	5.06028	3.08256	+	ENSG00000117335.14	CD46	CDS|25||3ss|8
chrX	48673180	48673234	3.87305	3.98195	+	ENSG00000094631.14	HDAC6	3utr|29||CDS|25
chr20	60736146	60736232	4.35459	3.40431	+	ENSG00000184402.10	SS18L1	proxintron|86
chr1	40029794	40029861	6.69317	4.17647	-	ENSG00000090621.9	PABPC4	proxintron|67
chr22	19708919	19708964	4.73795	4.59104	+	ENSG00000184702.13	2020-09-05	proxintron|45
chr22	22324655	22324690	4.56417	3.75956	-	ENSG00000100038.15	TOP3B	CDS|35
chr19	10252302	10252357	3.7815	3.14737	-	ENSG00000130816.10	DNMT1	proxintron|55
chr16	67863674	67863743	5.64001	3.34353	-	ENSG00000102901.8	CENPT	CDS|69
chr12	121765241	121765301	7.46649	3.23924	-	ENSG00000089053.8	ANAPC5	proxintron|60
chr1	55613332	55613407	4.33478	3.09104	-	ENSG00000162402.8	USP24	CDS|75
chrX	70766179	70766222	22.1683	3.16385	+	ENSG00000147162.9	OGT	distintron|43
chrX	70766222	70766269	24.629	3.12632	+	ENSG00000147162.9	OGT	distintron|47
chr17	39845440	39845558	11.5415	3.57317	+	ENSG00000173812.6	EIF1	proxintron|118
chr6	43593661	43593699	4.60441	3.12483	-	ENSG00000172432.14	GTPBP2	3ss|38
chr19	18548250	18548286	5.68483	4.96958	-	ENSG00000105655.14	ISYNA1	proxintron|36
chr22	39916919	39916972	5.2658	4.35776	+	ENSG00000128272.10	ATF4	5utr|53
chr22	39917001	39917026	3.19517	3.40431	+	ENSG00000128272.10	ATF4	5utr|25
chr1	21076335	21076376	7.6689	3.07137	-	ENSG00000127483.13	HP1BP3	CDS|41
chr11	61643941	61644028	6.33376	4.00727	-	ENSG00000221968.4	FADS3	3utr|87
chr7	881846	881947	4.96253	3.35011	+	ENSG00000164828.13	SUN1	5ss|22||proxintron|79
chr7	100285416	100285457	6.29344	3.55105	-	ENSG00000146830.9	GIGYF1	CDS|41
chr7	26239417	26239458	26.5181	5.29698	-	ENSG00000122566.16	HNRNPA2B1	distintron|41
chr7	26239458	26239493	25.872	5.23631	-	ENSG00000122566.16	HNRNPA2B1	distintron|35
chr22	20077316	20077411	6.4289	3.0679	+	ENSG00000128191.9	DGCR8	5ss|76||CDS|19
chr15	63930910	63930930	4.20532	4.27607	-	ENSG00000103657.9	HERC1	CDS|20
chr16	85699641	85699677	5.33061	4.99653	+	ENSG00000131149.13	GSE1	CDS|36
chr12	71888881	71888888	4.73795	5.10978	+	ENSG00000139292.8	LGR5	distintron|7
chr12	71888888	71888901	4.73795	5.10978	+	ENSG00000139292.8	LGR5	distintron|13
chr12	71888875	71888881	4.73795	5.10978	+	ENSG00000139292.8	LGR5	distintron|6
chr11	70117369	70117478	4.33478	3.3563	+	ENSG00000131626.11	PPFIA1	5ss|52||5utr|57
chr3	42642212	42642271	7.7227	4.05204	+	ENSG00000114857.13	NKTR	5utr|59
chr10	70092427	70092530	6.68087	4.09391	+	ENSG00000096746.13	HNRNPH3	proxintron|47||distintron|56
chr16	2579938	2580000	4.73795	4.66324	+	ENSG00000162066.10	AMDHD2	3utr|62
chr9	128003223	128003259	7.47184	3.72115	-	ENSG00000044574.7	HSPA5	5ss|25||3ss|11
chr11	62375052	62375127	4.44418	3.50608	-	ENSG00000149499.7	EML3	5ss|75
chr4	83350149	83350207	9.07847	5.97826	-	ENSG00000152795.13	HNRNPDL	proxintron|58
chr4	861054	861164	4.07023	3.10267	-	ENSG00000178950.12	GAK	CDS|110
chr1	982373	982405	3.11651	4.2728	+	ENSG00000188157.9	AGRN	5ss|32
chr4	103748606	103748683	7.72641	4.39104	-	ENSG00000109332.15	UBE2D3	5utr|77
chr12	53689728	53689788	3.83993	4.21833	+	ENSG00000123349.9	PFDN5	5ss|60
chr6	35436962	35437029	7.08748	3.25393	+	ENSG00000198755.6	RPL10A	proxintron|67
chr19	45561007	45561085	4.35459	3.1746	+	ENSG00000104859.10	CLASRP	CDS|78
chr12	54676512	54676543	7.05406	4.46583	+	ENSG00000135486.13	HNRNPA1	5ss|28||3ss|3
chr1	12321026	12321087	4.89143	3.1829	+	ENSG00000048707.9	VPS13D	CDS|61
chr2	128051105	128051287	4.44418	3.59104	-	ENSG00000163161.8	ERCC3	CDS|182
chr1	249152259	249152310	4.11007	3.11183	-	ENSG00000171163.11	ZNF692	5ss|45||CDS|6
chr2	61404815	61404889	5.07593	3.19241	+	ENSG00000173209.18	AHSA2	5utr|74
chr1	182825116	182825190	5.28974	3.52482	+	ENSG00000135829.12	DHX9	proxintron|24||distintron|50
chr17	40937045	40937129	5.31269	4.75956	+	ENSG00000126562.12	WNK4	CDS|15||3ss|69
chr19	13050171	13050217	5.2658	4.69679	+	ENSG00000179218.9	CALR	3ss|46
chr1	186325760	186325789	3.88773	3.42052	-	ENSG00000047410.9	TPR	proxintron|29
chr1	245026675	245026738	3.23928	3.03145	-	ENSG00000153187.12	HNRNPU	proxintron|63
chr1	21091869	21091930	18.2057	3.08753	-	ENSG00000127483.13	HP1BP3	CDS|61
chr1	16959777	16959837	5.23959	3.41919	-	lncRNA|lnc-NBPF1-1||ENSG00000215908.5	CROCCP2|lnc-NBPF1-1	noncoding_exon|60
chrX	13347831	13347889	16.9549	3.68403	+	lncRNA|LINC01203	LINC01203	noncoding_exon|58
chrX	70767584	70767603	38.577	3.26134	+	ENSG00000147162.9	OGT	proxintron|19
chrX	70767603	70767622	37.7895	3.10453	+	ENSG00000147162.9	OGT	proxintron|19
chr16	2806335	2806371	6.67312	3.93986	+	ENSG00000167978.12	SRRM2	CDS|6||5utr|30
chr16	2806371	2806409	5.5366	3.30486	+	ENSG00000167978.12	SRRM2	CDS|38
chr10	124768019	124768165	4.20532	4.94547	-	ENSG00000095574.7	IKZF5	5ss|56||proxintron|90
chr15	34729904	34729984	3.5548	4.76289	-	ENSG00000175265.13	GOLGA8A	distintron|80
chr16	89607839	89607965	5.44852	3.72381	+	ENSG00000197912.9	SPG7	distintron|126
chr2	183902835	183902941	8.42997	4.79079	-	ENSG00000061676.10	NCKAP1	5utr|106
chrX	70764428	70764442	10.5671	3.03747	+	ENSG00000147162.9	OGT	CDS|14
chr3	186506501	186506533	8.24174	3.88885	+	ENSG00000156976.10	EIF4A2	proxintron|32
chr22	19165058	19165224	10.2135	3.39699	-	ENSG00000100075.5	SLC25A1	5ss|85||proxintron|81
chr11	65190404	65190465	62.0724	3.0757	+	lncRNA|NEAT1||ENSG00000245532.4	NEAT1	noncoding_exon|61
chr12	56993648	56993702	4.57274	4.60772	-	ENSG00000076108.7	BAZ2A	5ss|13||3ss|41
chr3	88107449	88107556	5.68483	5.27607	-	ENSG00000163320.6	CGGBP1	proxintron|82||3ss|25
chr6	74230216	74230265	10.9425	4.6439	-	ENSG00000156508.13	EEF1A1	5utr|49
chr17	42401996	42402028	3.83993	4.37076	-	ENSG00000013306.11	SLC25A39	5utr|32
chr12	9571104	9571168	5.61329	4.121	-	ENSG00000214826.4	DDX12P	noncoding_exon|64
chr15	34729597	34729653	5.72906	3.77134	-	lncRNA|lnc-GOLGA8A-1	lnc-GOLGA8A-1	noncoding_exon|54||noncoding_5ss|2
chr11	47753953	47754023	5.6267	4.66324	-	ENSG00000109920.8	FNBP4	5ss|35||proxintron|35
chr11	57193267	57193308	3.53224	3.3933	-	ENSG00000134802.13	SLC43A3	5utr|41
chrX	153236406	153236496	7.38508	3.44676	-	ENSG00000172534.9	HCFC1	5utr|90
chr18	47807739	47807819	4.96253	3.27134	-	ENSG00000141644.13	MBD1	5utr|80
chr22	42229409	42229440	3.47686	4.30799	+	ENSG00000198911.7	SREBF2	5ss|31
chr3	50102495	50102560	4.21715	3.9002	+	ENSG00000004534.10	RBM6	CDS|65
chr1	78426117	78426164	5.5366	3.121	-	ENSG00000162613.12	FUBP1	CDS|47
chr7	148514796	148514817	5.5366	3.32267	-	ENSG00000106462.6	EZH2	proxintron|21
chr1	158587969	158588032	3.84989	4.45953	-	ENSG00000163554.7	SPTA1	proxintron|63
chr7	97501219	97501252	4.61518	3.22303	-	ENSG00000070669.12	ASNS	5utr|33
chrX	100878430	100878547	3.47686	4.7728	+	lncRNA|lnc-ARMCX1-2	lnc-ARMCX1-2	noncoding_exon|117
chr1	26800029	26800094	9.72522	3.23828	+	ENSG00000198830.6	HMGN2	5ss|65
chr1	25573226	25573287	5.06028	3.10978	-	ENSG00000117616.13	C1orf63	CDS|61
chrX	153226366	153226415	3.83993	4.62804	-	ENSG00000172534.9	HCFC1	distintron|49
chr19	805855	805956	11.7874	3.82835	+	ENSG00000011304.12	PTBP1	proxintron|101
chr22	50898187	50898242	3.83993	4.33556	-	ENSG00000100241.16	SBF1	proxintron|46||3ss|9
chr17	78355660	78355779	5.61991	3.98318	+	ENSG00000173821.15	RNF213	proxintron|119
chr11	85375095	85375175	10.8174	3.35397	-	ENSG00000137504.9	CREBZF	CDS|80
chr11	85375175	85375248	8.66581	3.27061	-	ENSG00000137504.9	CREBZF	CDS|73
chr2	114353480	114353581	5.90887	3.96708	+	ENSG00000146556.10	WASH2P	noncoding_exon|101
chr1	31538461	31538498	6.32673	3.70164	-	ENSG00000134644.11	PUM1	5ss|1||5utr|36
chr1	249151729	249151801	10.6167	4.15336	-	ENSG00000171163.11	ZNF692	proxintron|4||3ss|68
chrX	48759753	48759813	3.87305	3.63601	+	ENSG00000102103.11	PQBP1	5ss|18||CDS|42
chr12	56572575	56572631	4.89143	3.32072	-	ENSG00000139613.7	SMARCC2	5ss|18||CDS|38
chr15	91455555	91455591	9.45622	4.8198	+	ENSG00000196547.10	MAN2A2	5ss|36
chr15	91455513	91455555	8.55597	4.51878	+	ENSG00000196547.10	MAN2A2	5ss|42
chr21	47981959	47982041	5.64001	3.84353	+	ENSG00000160305.13	DIP2A	proxintron|82
chr16	70287428	70287459	9.2449	4.64732	-	ENSG00000090861.11	AARS	proxintron|31
chr1	39760792	39760822	4.20532	4.3563	+	ENSG00000127603.19	MACF1	CDS|30
chr1	35654236	35654263	3.25112	3.12581	-	ENSG00000116560.6	SFPQ	proxintron|27
chr1	35654219	35654236	3.25112	3.08208	-	ENSG00000116560.6	SFPQ	proxintron|17
chr19	49378194	49378259	4.00046	3.12902	+	ENSG00000087074.7	PPP1R15A	CDS|65
chr1	93297955	93297984	4.96253	4.27824	+	ENSG00000122406.8	RPL5	proxintron|29
chr7	5569607	5569664	20.3974	5.41997	-	ENSG00000075624.9	ACTB	proxintron|50||5utr|7
chrX	70518080	70518157	5.15134	3.13098	+	ENSG00000147140.11	NONO	proxintron|77
chr1	24974578	24974658	3.43083	3.7728	+	ENSG00000133226.12	SRRM1	distintron|80
chr16	29810739	29810825	3.73046	3.12201	+	ENSG00000079616.8	KIF22	5ss|9||CDS|77
chr1	26800403	26800441	7.7227	4.37076	+	ENSG00000198830.6	HMGN2	proxintron|38
chr9	136217244	136217302	10.7693	3.69767	+	ENSG00000148303.12	RPL7A	5ss|31||proxintron|27
chr6	161490835	161490928	3.11651	4.33556	+	ENSG00000085511.15	MAP3K4	distintron|93
chr14	70234692	70234730	4.91381	3.85484	+	ENSG00000100650.11	SRSF5	5ss|25||5utr|13
chr20	62368749	62368792	3.11651	4.33556	+	ENSG00000203896.5	LIME1	5utr|43
chr12	54674758	54674827	6.33387	3.36654	+	ENSG00000135486.13	HNRNPA1	proxintron|31||CDS|21||5utr|17
chr19	5616433	5616470	3.7815	3.2506	-	ENSG00000130254.7	SAFB2	CDS|37
chr15	89805078	89805109	5.5366	3.45125	+	ENSG00000140525.13	FANCI	CDS|31
chr1	156531793	156531910	8.07564	4.35272	-	ENSG00000183856.6	IQGAP3	proxintron|16||3ss|101
chr17	62499796	62499802	6.33376	4.29141	-	ENSG00000108654.7	DDX5	proxintron|6
chrX	19370245	19370294	4.96253	3.2136	+	ENSG00000131828.9	PDHA1	distintron|49
chr15	91303858	91303948	5.61991	4.13004	+	ENSG00000197299.6	BLM	CDS|90
chr3	156870493	156870579	7.02132	4.6247	-	ENSG00000163660.7	CCNL1	proxintron|86
chr19	15511020	15511055	3.5548	4.28579	-	ENSG00000011243.13	AKAP8L	5ss|35
chr1	45242464	45242493	7.92812	3.3121	+	ENSG00000142937.7	RPS8	5ss|29
chr1	67891139	67891202	3.7815	3.31935	-	ENSG00000142864.10	SERBP1	proxintron|63
chr8	145001255	145001301	3.83993	4.55204	-	ENSG00000178209.10	PLEC	3ss|46
chrX	70766650	70766663	37.082	3.0986	+	ENSG00000147162.9	OGT	distintron|13
chr2	97532456	97532511	3.19578	3.26547	-	ENSG00000168758.6	SEMA4C	proxintron|55
chr17	78311230	78311342	4.57274	4.44676	+	ENSG00000173821.15	RNF213	proxintron|55||3ss|57
chr17	39845699	39845743	9.5004	4.04308	+	ENSG00000173812.6	EIF1	proxintron|44
chr11	62019664	62019693	7.18475	4.95572	-	ENSG00000254404.1||lncRNA|lnc-SCGB1D4-2	lnc-SCGB1D4-2|RP11-703H8.9	noncoding_distintron|29
chrX	12994581	12994611	4.56417	3.83556	+	ENSG00000205542.6	TMSB4X	proxintron|30
chr2	27258610	27258680	7.41632	4.57828	+	ENSG00000119777.14	TMEM214	5ss|70
chr6	99860606	99860616	4.63761	3.02018	-	ENSG00000132424.10	PNISR	CDS|10
chr2	61720588	61720648	6.05823	5.79618	-	ENSG00000082898.12	XPO1	proxintron|60
chr16	89654774	89654844	7.47184	3.22115	+	ENSG00000178773.10	CPNE7	proxintron|70
chr5	137688424	137688529	4.94193	4.68578	+	ENSG00000120733.9	KDM3B	CDS|45||5utr|60
chr15	91453415	91453443	7.02132	3.72381	+	ENSG00000196547.10	MAN2A2	CDS|28
chr7	2411960	2412037	5.44882	3.29856	+	ENSG00000106263.13	EIF3B	proxintron|77
chr7	26239311	26239379	17.5037	3.88796	-	ENSG00000122566.16	HNRNPA2B1	distintron|68
chr1	160209618	160209680	3.88773	3.69679	-	ENSG00000132716.14||ENSG00000258465.2	DCAF8	CDS|62
chr17	27443863	27443962	6.06257	3.0986	-	ENSG00000196535.10	MYO18A	proxintron|99
chr17	80441734	80441827	6.69317	4.50251	+	ENSG00000141562.13	NARF	3utr|93
chr16	10480185	10480229	5.97596	3.94676	+	lncRNA|lnc-ATF7IP2-3	lnc-ATF7IP2-3	noncoding_exon|44
chr5	43121702	43121834	3.48958	3.3933	+	ENSG00000172262.7	ZNF131	5utr|132
chr1	249151962	249152026	9.5019	4.17279	-	ENSG00000171163.11	ZNF692	5ss|64
chr20	60737745	60737824	3.11651	4.33556	+	ENSG00000184402.10	SS18L1	CDS|17||3ss|62
chrX	48661533	48661588	5.61991	4.04981	+	ENSG00000094631.14	HDAC6	CDS|54||3ss|1
chr11	118888256	118888267	4.34068	3.31524	-	ENSG00000118181.6	RPS25	3ss|11
chr1	45243118	45243169	15.9	4.50963	+	ENSG00000142937.7	RPS8	proxintron|51
chr12	54675386	54675429	8.45416	3.38625	+	ENSG00000135486.13	HNRNPA1	proxintron|43
chr1	40035170	40035228	4.20532	4.52482	-	ENSG00000090621.9	PABPC4	5ss|58
chr4	103748300	103748373	9.5004	4.61183	-	ENSG00000109332.15	UBE2D3	proxintron|73
chr4	103748252	103748300	6.70786	3.64878	-	ENSG00000109332.15	UBE2D3	proxintron|20||5utr|28
chr19	39340071	39340136	4.20532	4.63601	-	ENSG00000104824.12	HNRNPL	proxintron|65
chr9	19379951	19380033	3.19578	3.77571	-	ENSG00000137154.8	RPS6	5utr|82
chr5	137894852	137894907	5.5366	3.20854	-	ENSG00000113013.8	HSPA9	distintron|55
chr2	61544795	61544845	4.57274	4.63601	-	ENSG00000115464.10	USP34	CDS|50
chr16	85690271	85690355	4.94193	5.21301	+	ENSG00000131149.13	GSE1	5ss|84
chr6	160210369	160210409	4.96253	4.51107	-	ENSG00000120438.7	TCP1	5ss|40
chr19	10792455	10792581	22.8974	3.31845	+	ENSG00000129351.13	ILF3	proxintron|113||3ss|13
chr6	131924998	131925086	5.97596	4.33556	-	ENSG00000112282.13	MED23	proxintron|88
chr3	182511305	182511444	4.07023	3.26988	+	ENSG00000058063.11	ATP11B	5utr|139
chr7	148507152	148507195	9.61355	4.49653	-	ENSG00000106462.6	EZH2	proxintron|43
chr7	148507195	148507255	7.72641	3.72755	-	ENSG00000106462.6	EZH2	proxintron|60
chr19	10464468	10464546	9.2449	4.5884	-	ENSG00000105397.9	TYK2	5utr|78
chr6	16129371	16129447	8.27185	3.32801	+	ENSG00000007944.10	MYLIP	5utr|76
chr17	30696668	30696700	4.61518	3.22303	+	ENSG00000010244.12	ZNF207	CDS|32
chr4	83350089	83350149	7.18475	6.00102	-	ENSG00000152795.13	HNRNPDL	proxintron|60
chr1	17437	17563	7.415	3.31935	-	MI0022705	hsa-mir-6859-1	miRNA_proximal|126
chr12	121768998	121769086	7.41632	4.46708	-	ENSG00000089053.8	ANAPC5	5utr|88
chr1	22199489	22199518	3.11651	4.30486	-	ENSG00000142798.12	HSPG2	CDS|29
chr10	103577763	103577818	5.5366	3.56034	-	ENSG00000198408.9	MGEA5	CDS|17||5utr|38
chr10	103577666	103577763	9.74141	3.19461	-	ENSG00000198408.9	MGEA5	CDS|97
chr22	42299464	42299522	3.48958	3.29433	+	ENSG00000198911.7	SREBF2	proxintron|58
chr18	9914357	9914411	4.94193	4.71301	+	ENSG00000101558.9	VAPA	5ss|54
chr12	57906420	57906522	13.1311	4.73118	+	MI0022603	hsa-mir-6758	miRNA_proximal|50||miRNA|52
chr9	128000688	128000759	10.1157	3.46847	-	ENSG00000044574.7	HSPA5	proxintron|71
chr1	26799304	26799351	6.33376	4.96896	+	ENSG00000198830.6	HMGN2	proxintron|47
chr9	95012727	95012776	6.51267	5.19679	-	ENSG00000196305.13	IARS	proxintron|49
chr6	37443216	37443278	5.2658	3.84452	+	ENSG00000137200.8	CMTR1	5ss|62
chr22	22042000	22042020	5.31891	3.7358	+	ENSG00000100023.13	PPIL2	CDS|20
chr11	64541255	64541334	7.2388	3.27653	-	ENSG00000168066.16	SF1	proxintron|79
chr11	67377212	67377243	4.34068	3.15428	+	ENSG00000167792.7	NDUFV1	proxintron|31
chr7	129097968	129098038	9.14798	3.33422	+	ENSG00000128578.5	STRIP2	3ss|70
chr21	44520799	44520868	4.69579	3.19436	-	ENSG00000160201.7	U2AF1	proxintron|69
chr6	160210155	160210257	9.27486	4.49933	-	ENSG00000120438.7	TCP1	proxintron|102
chr17	34863869	34863954	5.44852	3.41156	-	ENSG00000141140.12	MYO19	proxintron|85
chr3	186505804	186505851	9.30977	3.64235	+	ENSG00000156976.10	EIF4A2	proxintron|47
chr3	186505851	186505872	3.82085	3.35727	+	ENSG00000156976.10	EIF4A2	proxintron|21
chr7	100285224	100285289	4.56417	4.20404	-	ENSG00000146830.9	GIGYF1	CDS|16||3ss|49
chr17	46052407	46052482	23.0065	4.2871	+	ENSG00000108465.10	CDK5RAP3	proxintron|17||3ss|58
chr17	46052353	46052407	15.851	3.20796	+	ENSG00000108465.10	CDK5RAP3	proxintron|54
chr16	31196527	31196585	14.5739	4.09155	+	ENSG00000089280.14	FUS	5ss|58
chr16	1795111	1795192	5.06028	3.10978	+	ENSG00000138834.8	MAPK8IP3	distintron|81
chr5	891264	891343	5.31891	4.13403	-	ENSG00000028310.13	BRD9	5ss|5||CDS|74
chr5	10261405	10261504	3.73046	3.27607	+	ENSG00000150753.7	CCT5	proxintron|99
chr1	156531950	156532012	5.5366	3.38982	-	ENSG00000183856.6	IQGAP3	proxintron|62
chr11	291267	291327	5.2658	3.8173	+	ENSG00000142102.11	ATHL1	proxintron|60
chr15	34727639	34727673	7.23013	3.67999	-	lncRNA|lnc-GOLGA8A-1	lnc-GOLGA8A-1	noncoding_exon|34
chr15	34727583	34727639	4.64384	3.07253	-	lncRNA|lnc-GOLGA8A-1	lnc-GOLGA8A-1	noncoding_exon|55||noncoding_5ss|1
chr10	72577389	72577393	45.971	3.19926	+	lncRNA|lnc-ADAMTS14-1	lnc-ADAMTS14-1	noncoding_exon|4
chr10	72577393	72577404	45.7226	3.16244	+	lncRNA|lnc-ADAMTS14-1	lnc-ADAMTS14-1	noncoding_exon|11
chr21	47666417	47666492	6.50316	4.18578	-	ENSG00000160294.6	MCM3AP	5ss|51||proxintron|22||3ss|2
chr1	156530728	156530811	5.2658	4.05204	-	ENSG00000183856.6	IQGAP3	CDS|83
chr12	54676697	54676777	8.99114	3.10091	+	ENSG00000135486.13	HNRNPA1	5ss|62||proxintron|3||3ss|15
chr7	128490009	128490067	4.96253	3.35011	+	ENSG00000128591.11	FLNC	CDS|38||3ss|20
chr5	65454957	65454998	4.56417	3.88212	+	ENSG00000153914.11	SREK1	3ss|41
chr4	56262738	56262812	5.23959	3.13403	+	ENSG00000134851.8	TMEM165	proxintron|74
chr17	56083697	56083741	10.1022	3.27074	-	ENSG00000136450.8	SRSF1	5ss|6||CDS|38
chr19	39961092	39961162	6.43275	4.95953	+	ENSG00000196235.9	SUPT5H	CDS|70
chrX	48661342	48661407	4.33478	3.07072	+	ENSG00000094631.14	HDAC6	CDS|65
chr14	73570053	73570105	6.29344	3.74456	+	ENSG00000119707.9	RBM25	CDS|52
chr14	73569958	73570053	7.71823	3.72303	+	ENSG00000119707.9	RBM25	CDS|95
chr12	123868867	123868916	3.52965	3.20404	+	ENSG00000183955.8	SETD8	proxintron|49
chr10	94450398	94450487	4.33478	3.16704	+	ENSG00000152804.6	HHEX	proxintron|89
chr11	62651730	62651814	6.69317	5.20179	+	ENSG00000168003.12	SLC3A2	proxintron|84
chr16	841583	841633	5.98231	3.48032	+	ENSG00000127586.12	CHTF18	proxintron|50
chr12	57037030	57037064	6.05935	3.13807	-	ENSG00000110955.4	ATP5B	proxintron|34
chr1	1323164	1323187	5.5366	3.32267	-	ENSG00000221978.7	CCNL2	CDS|23
chr20	33591765	33591836	7.37122	3.79007	-	ENSG00000100991.7	TRPC4AP	proxintron|71
chr19	12787373	12787468	5.2658	3.8173	-	ENSG00000095059.11	DHPS	proxintron|95
chr22	20077641	20077695	4.53378	3.45189	+	ENSG00000128191.9	DGCR8	CDS|54
chr19	805751	805782	4.21715	4.08149	+	ENSG00000011304.12	PTBP1	proxintron|31
chr19	805690	805751	7.04552	3.8242	+	ENSG00000011304.12	PTBP1	proxintron|61
chr1	245026552	245026621	14.6415	4.21754	-	ENSG00000153187.12	HNRNPU	proxintron|69
chr14	23538203	23538252	5.14394	3.32977	-	ENSG00000100813.10	ACIN1	proxintron|49
chr4	39700049	39700123	4.91381	3.87929	+	ENSG00000078140.9	UBE2K	5ss|62||proxintron|12
chr1	1326868	1326957	28.3188	3.40151	-	ENSG00000221978.7	CCNL2	distintron|89
chr1	249151820	249151922	19.1146	4.58327	-	ENSG00000171163.11	ZNF692	proxintron|102
chr12	57036742	57036773	5.75508	3.44345	-	ENSG00000110955.4	ATP5B	proxintron|31
chr8	23425950	23426015	6.93405	3.19187	+	ENSG00000147454.9	SLC25A37	5ss|42||proxintron|23
chr17	46055246	46055271	5.64001	3.34353	+	ENSG00000108465.10	CDK5RAP3	CDS|25
chr19	13059783	13059877	7.41632	4.29856	+	ENSG00000179262.5	RAD23A	proxintron|11||3ss|83
chr3	156877657	156877758	8.51033	4.88352	-	ENSG00000163660.7	CCNL1	CDS|101
chr1	68151362	68151385	5.68483	5.17177	+	ENSG00000116717.7	GADD45A	proxintron|23
chr7	142658882	142658962	7.04552	3.92949	-	ENSG00000197993.3	KEL	CDS|78||3ss|2
chr16	840969	841028	13.1518	4.90431	+	ENSG00000127586.12	CHTF18	proxintron|59
chr1	16958767	16958824	6.39837	3.20943	-	lncRNA|lnc-NBPF1-1||ENSG00000215908.5	CROCCP2|lnc-NBPF1-1	noncoding_exon|55||noncoding_5ss|2
chrX	154002991	154003038	3.47686	5.00251	+	ENSG00000130826.11	DKC1	5ss|47
chr20	42087789	42087826	3.43083	3.29856	+	ENSG00000124193.10	SRSF6	distintron|37
chr19	14524290	14524343	4.96253	3.50608	-	ENSG00000123136.10	DDX39A	proxintron|53
chr3	47883292	47883395	8.90979	4.37929	+	ENSG00000132153.10	DHX30	5ss|36||proxintron|67
chr11	67378132	67378176	5.02584	3.98195	+	ENSG00000167792.7	NDUFV1	5ss|10||proxintron|34
chr15	20651111	20651180	3.19517	3.69679	-	ENSG00000180229.8	HERC2P3	noncoding_exon|69
chr1	180601161	180601285	6.27855	3.08066	+	ENSG00000143324.9	XPR1	5utr|124
chr5	170815203	170815270	10.604	6.23277	+	ENSG00000181163.9	NPM1	proxintron|67
chr7	26239893	26239922	20.4219	4.33212	-	ENSG00000122566.16	HNRNPA2B1	proxintron|29
chr7	26239941	26239973	19.4525	3.85671	-	ENSG00000122566.16	HNRNPA2B1	proxintron|32
chr14	24033034	24033157	5.64001	3.55795	-	ENSG00000213983.7	AP1G2	CDS|32||3ss|91
chr14	45565512	45565556	5.61991	4.21921	+	ENSG00000185246.13	PRPF39	5ss|20||proxintron|24
chr8	124360320	124360385	5.86012	3.31111	-	MI0003668	hsa-mir-548d-1	miRNA_proximal|14||miRNA|51
chr17	54973111	54973169	3.11651	4.73924	-	ENSG00000121060.10	TRIM25	proxintron|58
chr16	1500428	1500491	4.21715	3.95953	-	ENSG00000103249.13	CLCN7	5ss|63
chrX	48674068	48674122	3.53224	3.87504	+	ENSG00000094631.14	HDAC6	5ss|54
chr9	86585302	86585391	5.82954	3.68578	-	ENSG00000165119.14	HNRNPK	proxintron|44||3ss|45
chr19	54972117	54972166	30.2433	3.4668	+	ENSG00000167615.12	LENG8	3utr|49
chr14	21737354	21737411	8.00474	3.86308	-	ENSG00000092199.13	HNRNPC	5ss|55||proxintron|2
chr19	13050059	13050092	6.05823	5.97826	+	ENSG00000179218.9	CALR	5ss|33
chr21	46284237	46284288	3.47686	4.46205	-	ENSG00000183255.7	PTTG1IP	distintron|51
chr1	226054990	226055048	5.68483	4.77607	-	ENSG00000196187.7	TMEM63A	proxintron|58
chr22	29685013	29685113	10.5274	3.6052	+	ENSG00000182944.13	EWSR1	proxintron|100
chr3	43741526	43741604	4.56417	4.21833	+	ENSG00000011198.3	ABHD5	distintron|78
chr1	46726405	46726449	5.03432	4.59104	+	ENSG00000085999.7	RAD54L	CDS|44
chr9	139621055	139621087	4.20532	4.3933	-	ENSG00000233016.2||lncRNA|SNHG7	SNHG7	noncoding_exon|32
chr19	33119210	33119277	4.20532	5.29698	-	ENSG00000105186.10	ANKRD27	proxintron|67
chr1	39910378	39910433	4.20532	4.70943	+	ENSG00000127603.19	MACF1	CDS|55
chr9	140709072	140709149	4.94193	4.78901	+	ENSG00000181090.13	EHMT1	proxintron|77
chr7	129091453	129091510	7.75451	3.60978	+	ENSG00000128578.5	STRIP2	CDS|57
chr7	150761496	150761607	7.72641	4.07289	+	ENSG00000164889.8	SLC4A2	5ss|38||3ss|73
chr4	128802369	128802512	8.42997	4.24834	+	ENSG00000142731.6	PLK4	5ss|17||5utr|126
chr11	820101	820213	4.96253	3.56382	+	ENSG00000177666.11	PNPLA2	proxintron|112
chr10	28822308	28822374	3.35374	3.04883	+	ENSG00000095787.17	WAC	5utr|66
chr12	133233719	133233773	5.59237	3.23924	-	ENSG00000177084.12	POLE	5ss|2||CDS|52
chr19	18548031	18548104	9.81816	3.7978	-	ENSG00000105655.14	ISYNA1	5utr|73
chr1	39814935	39814995	5.31269	4.57828	+	ENSG00000127603.19	MACF1	proxintron|60
chr11	10829005	10829018	3.19517	3.46708	-	ENSG00000110321.11	EIF4G2	5ss|8||5utr|5
chr16	1510736	1510821	5.30001	3.79433	-	ENSG00000103249.13	CLCN7	5ss|80||CDS|5
chr1	35656692	35656753	11.4684	4.79698	-	ENSG00000116560.6	SFPQ	proxintron|56||3ss|5
chr16	71955023	71955085	3.19517	4.09104	+	ENSG00000182149.16	IST1	proxintron|62
chr20	42087543	42087628	7.67262	3.24862	+	ENSG00000124193.10	SRSF6	proxintron|85
chr7	142650390	142650429	3.47686	4.54082	-	ENSG00000197993.3	KEL	proxintron|35||distintron|4
chrX	70586495	70586575	6.69317	4.17647	+	ENSG00000147133.11	TAF1	proxintron|80
chr22	21083598	21083633	5.07593	3.03583	-	ENSG00000241973.6	PI4KA	5ss|2||CDS|33
chr1	19514011	19514033	5.6267	4.62201	-	ENSG00000127481.10	UBR4	CDS|22
chr7	158448668	158448734	6.50316	4.3173	-	ENSG00000146918.15	NCAPG2	proxintron|66
chr10	21901269	21901341	6.69317	3.98928	+	ENSG00000078403.12	MLLT10	CDS|65||3ss|7
chr1	226254000	226254066	3.53224	3.55426	+	ENSG00000163041.5	H3F3A	3utr|66
chrX	13329244	13329254	5.06028	3.3933	+	lncRNA|LINC01203	LINC01203	noncoding_exon|10
chr1	111682517	111682604	4.07023	3.13337	-	ENSG00000156171.10	DRAM2	5utr|87
chr5	10250573	10250642	3.53224	3.8173	+	ENSG00000150753.7	CCT5	5ss|69
chr19	54967612	54967642	6.26736	3.37076	+	ENSG00000167615.12	LENG8	CDS|30
chr19	17690667	17690758	3.19578	3.43055	+	ENSG00000130309.6	COLGALT1	proxintron|91
chrX	13346243	13346277	7.46649	3.89052	+	lncRNA|LINC01203	LINC01203	noncoding_exon|34
chr7	5568528	5568582	15.5464	3.99239	-	ENSG00000075624.9	ACTB	proxintron|54
chr7	5568582	5568611	7.41481	3.48766	-	ENSG00000075624.9	ACTB	proxintron|29
chr5	176981119	176981179	3.7815	3.40188	-	ENSG00000146067.11	FAM193B	5utr|60
chr22	22312566	22312630	4.03208	3.14586	-	ENSG00000100038.15	TOP3B	3utr|64
chr3	47889591	47889653	4.61518	3.15083	+	ENSG00000132153.10	DHX30	3ss|62
chr1	39782946	39783020	4.94193	4.53172	+	ENSG00000127603.19	MACF1	CDS|74
chr4	83276102	83276162	12.1033	3.6746	-	ENSG00000138668.14	HNRNPD	3utr|53||3ss|7
chr3	42660590	42660654	9.27486	3.48359	+	ENSG00000114857.13	NKTR	5ss|34||CDS|30
chr3	42661519	42661525	4.21715	3.53172	+	ENSG00000114857.13	NKTR	CDS|6
chr12	54677288	54677329	8.65201	3.67918	+	ENSG00000135486.13	HNRNPA1	proxintron|41
chr19	18963178	18963249	4.35459	3.85921	+	ENSG00000005007.8	UPF1	5ss|28||proxintron|43
chr15	93426360	93426435	4.21715	4.31266	+	lncRNA|LINC01578||ENSG00000272888.1	LINC01578|AC013394.2	noncoding_exon|59||noncoding_5ss|16
chr16	58591874	58591911	5.61991	4.11081	-	ENSG00000125107.12	CNOT1	proxintron|35||distintron|2
chr16	71958362	71958481	4.03208	3.76704	+	ENSG00000182149.16	IST1	proxintron|119
chr5	179248500	179248634	4.07023	4.26988	+	ENSG00000161011.15	SQSTM1	proxintron|134
chr11	10821498	10821591	13.3191	4.39883	-	ENSG00000110321.11	EIF4G2	5ss|55||proxintron|38
chr7	97501451	97501485	5.3257	3.02134	-	ENSG00000070669.12	ASNS	proxintron|7||5utr|27
chr19	41770714	41770804	4.21715	4.38982	+	ENSG00000105323.12	HNRNPUL1	5ss|37||5utr|53
chr16	71957558	71957612	3.73046	3.45889	+	ENSG00000182149.16	IST1	proxintron|54
chr17	78355548	78355611	5.31269	4.61183	+	ENSG00000173821.15	RNF213	5ss|63
chr17	79479551	79479629	4.96253	4.77134	-	ENSG00000184009.5	ACTG1	5utr|78
chr5	6607122	6607237	11.0961	4.62201	-	ENSG00000037474.10	NSUN2	5ss|25||proxintron|86||3ss|4
chr1	113238962	113238995	3.83993	4.87076	+	ENSG00000155363.14	MOV10	5ss|4||3ss|29
chr5	177632122	177632176	3.48958	3.20404	+	ENSG00000197451.6	HNRNPAB	5ss|26||proxintron|28
chr1	185275653	185275720	9.5019	3.61314	-	ENSG00000116679.11	IVNS1ABP	5utr|67
chr1	185275720	185275755	7.72641	3.41583	-	ENSG00000116679.11	IVNS1ABP	5utr|35
chr1	29508031	29508118	5.5366	3.16609	-	ENSG00000116350.11	SRSF4	5ss|61||proxintron|26
chr17	7125925	7125976	6.70786	3.37504	+	ENSG00000072778.15	ACADVL	3ss|51
chr17	40369774	40369818	3.83993	4.57828	-	ENSG00000173757.5	STAT5B	proxintron|44
chr2	178080407	178080458	5.31269	5.12804	+	ENSG00000170144.14	HNRNPA3	5ss|27||3ss|24
chr7	26239210	26239280	32.6217	4.97183	-	ENSG00000122566.16	HNRNPA2B1	distintron|70
chr12	57036872	57036911	6.93405	3.4744	-	ENSG00000110955.4	ATP5B	proxintron|39
chr16	85696317	85696392	8.0694	3.58149	+	ENSG00000131149.13	GSE1	proxintron|75
chr5	179048467	179048549	26.7734	3.2482	-	ENSG00000169045.13	HNRNPH1	proxintron|36||5utr|46
chr22	22312346	22312400	4.56417	3.75956	-	ENSG00000100038.15	TOP3B	3utr|54
chr22	26164619	26164679	3.87305	3.60772	+	ENSG00000133454.11	MYO18B	CDS|60
chr7	100229802	100229863	5.68483	4.90295	-	ENSG00000106327.8	TFR2	CDS|20||3ss|41
chr3	160117905	160117961	5.23959	3.40431	+	ENSG00000113810.11	SMC4	5utr|56
chr12	112847052	112847131	4.91381	3.87929	-	ENSG00000089009.11	RPL6	5utr|79
chr16	84214312	84214406	5.02584	3.70224	-	ENSG00000103168.12	TAF1C	proxintron|94
chr6	95156844	95156861	5.06028	3.20943	-	lncRNA|lnc-EPHA7-8||ENSG00000216853.1	RP3-399J4.1|lnc-EPHA7-8	noncoding_exon|17
chr6	95156833	95156844	5.06028	3.20943	-	lncRNA|lnc-EPHA7-8||ENSG00000216853.1	RP3-399J4.1|lnc-EPHA7-8	noncoding_exon|11
chr3	160117562	160117618	6.06257	3.0986	+	ENSG00000113810.11	SMC4	5utr|56
chr5	131015051	131015120	3.47686	4.34155	-	ENSG00000217128.7	FNIP1	proxintron|69
chr3	186505964	186506009	7.41481	3.18083	+	ENSG00000156976.10	EIF4A2	proxintron|45
chr3	186506009	186506044	4.46332	3.00963	+	ENSG00000156976.10	EIF4A2	proxintron|35
chr4	83276199	83276275	13.1207	3.65185	-	ENSG00000138668.14	HNRNPD	3utr|45||3ss|31
chr3	156877337	156877385	4.20532	4.87504	-	ENSG00000163660.7	CCNL1	proxintron|16||3ss|32
chrX	48935379	48935486	6.3712	3.22565	-	ENSG00000196998.11	WDR45	5ss|79||CDS|28
chr6	35437053	35437089	8.31894	5.37076	+	ENSG00000198755.6	RPL10A	proxintron|4||3ss|32
chr22	20094545	20094575	5.59237	3.23924	+	ENSG00000128191.9	DGCR8	proxintron|30
chr17	80441661	80441733	3.06425	3.10392	+	ENSG00000141562.13	NARF	3utr|72
chr15	93426677	93426747	4.21715	4.59734	+	ENSG00000173575.14	CHD2	5utr|70
chr3	139092594	139092646	3.19578	3.07828	-	ENSG00000184432.5	COPB2	CDS|52
chr16	28167192	28167258	5.68483	4.74778	-	ENSG00000169180.7	XPO6	proxintron|66
chr16	23505835	23505953	5.97596	4.36501	-	ENSG00000103365.11	GGA2	proxintron|118
chr3	171177917	171177982	4.35459	3.11183	-	ENSG00000154310.12	TNIK	5utr|65
chr3	43743962	43744000	4.94193	4.78901	+	ENSG00000011198.3	ABHD5	CDS|38
chr6	43745629	43745683	8.88045	3.23082	+	ENSG00000112715.16	VEGFA	proxintron|54
chr4	152020906	152020961	3.47686	4.69679	+	ENSG00000145425.5	RPS3A	5utr|55
chr10	93741950	93741982	3.5548	4.13601	+	ENSG00000095564.9	BTAF1	CDS|32
chr19	8529217	8529258	3.83993	4.25956	+	ENSG00000099783.7	HNRNPM	distintron|41
chr15	91524393	91524463	3.53442	3.01238	-	ENSG00000198901.9	PRC1	proxintron|70
chr17	79479392	79479489	4.84058	4.52878	-	ENSG00000184009.5	ACTG1	5utr|97
chr13	74014641	74014645	11.9864	3.86444	-	lncRNA|LINC00393||ENSG00000224853.1	LINC00393	noncoding_distintron|4
chr13	74014632	74014641	11.9864	3.86444	-	lncRNA|LINC00393||ENSG00000224853.1	LINC00393	noncoding_distintron|9
chr13	74014625	74014630	11.9864	3.86444	-	lncRNA|LINC00393||ENSG00000224853.1	LINC00393	noncoding_distintron|5
chr11	291810	291883	4.56417	3.83556	+	ENSG00000142102.11	ATHL1	proxintron|65||3ss|8
chr20	42087399	42087406	8.76098	4.29234	+	ENSG00000124193.10	SRSF6	proxintron|7
chr20	42087347	42087399	10.2183	4.19418	+	ENSG00000124193.10	SRSF6	proxintron|52
chr20	42087406	42087424	4.93957	3.48195	+	ENSG00000124193.10	SRSF6	proxintron|18
chr19	5657303	5657357	3.48958	3.3933	+	ENSG00000160633.8	SAFB	CDS|54
chr5	889586	889652	7.10103	4.23924	-	ENSG00000028310.13	BRD9	5ss|51||proxintron|15
chr14	102552898	102552906	3.53224	6.3334	-	ENSG00000080824.14	HSP90AA1	proxintron|8
chr14	102552921	102552939	4.07023	6.29508	-	ENSG00000080824.14	HSP90AA1	proxintron|18
chr14	102552906	102552921	3.7815	6.18455	-	ENSG00000080824.14	HSP90AA1	proxintron|15
chr20	57564534	57564610	7.72641	3.78821	+	ENSG00000101158.8	NELFCD	CDS|68||3ss|8
chr16	31198249	31198353	16.9264	3.26966	+	ENSG00000089280.14	FUS	5ss|9||proxintron|95
chr1	32658064	32658108	4.56417	3.83556	+	ENSG00000084652.11	TXLNA	5ss|44
chr1	1601179	1601269	4.03208	3.3173	-	ENSG00000189339.7	SLC35E2B	3ss|90
chr5	134124377	134124445	3.7815	3.29715	+	ENSG00000145833.11	DDX46	5ss|5||proxintron|63
chr11	47753782	47753838	6.29344	3.55105	-	lncRNA|lnc-AGBL2-1	lnc-AGBL2-1	noncoding_exon|56
chr13	92000616	92000653	4.13664	3.1877	+	lncRNA|MIR17HG	MIR17HG	noncoding_exon|37
chr21	34942370	34942434	4.61518	3.37709	+	ENSG00000159140.13	SON	distintron|64
chr6	74230282	74230307	9.85946	4.28472	-	ENSG00000156508.13	EEF1A1	5utr|25
chr6	74230307	74230359	10.3059	3.64773	-	ENSG00000156508.13	EEF1A1	5utr|52
chr17	43012142	43012185	4.20532	5.00963	-	MI0022628	hsa-mir-6783	miRNA_proximal|43
chrX	13347052	13347104	8.0969	3.4223	+	lncRNA|LINC01203||ENSG00000235592.1	GS1-600G8.4|LINC01203	noncoding_exon|52
chr16	88799401	88799474	7.84315	3.0634	-	ENSG00000103335.15	PIEZO1	proxintron|73
chr12	133240961	133241043	5.72906	3.52482	-	ENSG00000177084.12	POLE	CDS|82
chr6	37138840	37138880	8.0694	4.53172	+	ENSG00000137193.9	PIM1	5ss|14||3ss|26
chr22	22318648	22318690	6.98974	3.04308	-	ENSG00000100038.15	TOP3B	CDS|40||3ss|2
chr14	31344375	31344446	3.07978	3.42052	+	ENSG00000100473.11	COCH	5ss|35||proxintron|36
chr11	85374393	85374453	8.24174	3.64765	-	ENSG00000137504.9	CREBZF	3utr|60
chr22	22041164	22041282	6.3712	3.39286	+	ENSG00000100023.13	PPIL2	CDS|102||3ss|16
chr16	1816119	1816144	3.47686	4.48928	+	ENSG00000138834.8	MAPK8IP3	CDS|25
chr9	34649192	34649265	4.94193	4.45953	+	ENSG00000213930.7	GALT	proxintron|73
chr1	40029677	40029745	6.67312	3.85142	-	ENSG00000090621.9	PABPC4	proxintron|50||3ss|18
chr1	40029632	40029662	3.53224	3.27607	-	ENSG00000090621.9	PABPC4	3ss|30
chr7	129592614	129592776	7.14648	3.67793	-	ENSG00000186591.7	UBE2H	5utr|162
chr16	50346131	50346185	4.56417	3.88212	+	ENSG00000121281.8	ADCY7	5ss|54
chr16	50346185	50346233	4.07023	3.34089	+	lncRNA|lnc-ADCY7-3	lnc-ADCY7-3	noncoding_exon|8||5ss|18||proxintron|22
chr10	99236760	99236818	3.5548	4.28579	-	ENSG00000155229.16	MMS19	3ss|58
chr7	26239564	26239594	11.1566	3.97826	-	ENSG00000122566.16	HNRNPA2B1	distintron|30
chr7	26239594	26239634	15.573	3.1528	-	ENSG00000122566.16	HNRNPA2B1	distintron|40
chr17	46051976	46052077	27.8493	4.3014	+	ENSG00000108465.10	CDK5RAP3	proxintron|101
chr1	46726109	46726168	5.98231	3.40431	+	ENSG00000085999.7	RAD54L	proxintron|4||3ss|55
chr9	140079937	140080030	5.68483	4.85484	-	ENSG00000176248.7	ANAPC2	proxintron|93
chr1	220383954	220384026	7.05406	4.38982	-	ENSG00000118873.11	RAB3GAP2	proxintron|72
chr6	136590073	136590121	3.83993	4.57828	-	ENSG00000029363.11	BCLAF1	proxintron|48
chr4	103748482	103748526	3.19578	3.89699	-	ENSG00000109332.15	UBE2D3	5ss|43||proxintron|1
chr8	67976778	67976892	3.11651	5.22186	+	ENSG00000104218.9	CSPP1	5ss|54||proxintron|60
chr16	88787037	88787146	11.5085	3.1782	-	ENSG00000103335.15	PIEZO1	CDS|109
chr21	44527263	44527351	5.6267	5.00727	-	ENSG00000160201.7	U2AF1	proxintron|88
chr19	54971482	54971589	37.1725	3.33541	+	ENSG00000167615.12	LENG8	3utr|107
chr12	132196966	132197003	4.73795	4.46708	+	ENSG00000061936.5	SFSWAP	5utr|37
chr12	54674939	54675019	7.37749	3.13188	+	ENSG00000135486.13	HNRNPA1	5ss|30||5utr|50
chr11	292959	293058	7.7227	3.77932	+	ENSG00000142102.11	ATHL1	5ss|60||CDS|39
chr16	1816220	1816265	4.57274	4.60772	+	ENSG00000138834.8	MAPK8IP3	CDS|45
chr3	186505880	186505925	5.47241	3.03616	+	ENSG00000156976.10	EIF4A2	proxintron|45
chr6	160209411	160209458	8.27457	3.89217	-	ENSG00000120438.7	TCP1	5utr|47
chr1	200589758	200589838	6.50316	4.05426	-	ENSG00000118193.7	KIF14	5utr|80
chr14	102551999	102552018	4.07023	6.58128	-	ENSG00000080824.14	HSP90AA1	5ss|19
chr14	102552018	102552026	3.48958	6.43047	-	ENSG00000080824.14	HSP90AA1	5ss|8
chr14	102552026	102552038	4.03208	6.26073	-	ENSG00000080824.14	HSP90AA1	5ss|12
chr1	19470382	19470429	8.51033	4.28176	-	ENSG00000127481.10	UBR4	5ss|47
chr15	42129512	42129590	3.87305	3.60772	+	ENSG00000243789.6	JMJD7	3utr|78
chr5	177632233	177632470	9.18609	3.85243	+	ENSG00000197451.6	HNRNPAB	proxintron|237
chr12	121766264	121766309	6.57703	3.62982	-	ENSG00000089053.8	ANAPC5	CDS|37||3ss|8
chr15	89828398	89828445	5.5366	3.49412	+	ENSG00000140525.13	FANCI	CDS|47
chr9	132631296	132631349	4.73422	3.7728	+	ENSG00000136878.8	USP20	5ss|53
chr1	39814370	39814466	8.60716	4.44805	+	ENSG00000127603.19	MACF1	distintron|96
chr16	2580715	2580788	5.6267	4.66324	+	ENSG00000162066.10	AMDHD2	3utr|27||CDS|46
chr15	72564656	72564764	4.21715	3.9002	-	ENSG00000137817.12	PARP6	5utr|108
chr12	56748752	56748797	3.19578	3.10451	-	ENSG00000170581.9	STAT2	proxintron|45
chr12	56748797	56748835	3.48958	3.04308	-	ENSG00000170581.9	STAT2	proxintron|38
chr12	62687959	62687987	4.93957	3.183	+	ENSG00000135655.9	USP15	CDS|28
chr14	102482424	102482489	7.94014	5.49412	+	ENSG00000197102.6	DYNC1H1	5ss|65
chr19	54972508	54972529	13.4527	4.88563	+	ENSG00000167615.12	LENG8	CDS|21
chr15	91446378	91446488	8.27185	3.10772	+	ENSG00000196547.10	MAN2A2	5utr|110
chr7	129093982	129094043	6.66862	3.40431	+	ENSG00000128578.5	STRIP2	CDS|61
chrX	48434194	48434273	11.7765	3.08768	+	ENSG00000102317.13	RBM3	5utr|79
chr7	26240016	26240066	44.318	4.23268	-	ENSG00000122566.16	HNRNPA2B1	proxintron|50
chr20	42087018	42087065	5.82954	3.35337	+	ENSG00000124193.10	SRSF6	CDS|47
chr1	45227701	45227752	6.43275	5.14878	+	ENSG00000142945.8	KIF2C	5ss|51
chr17	60142388	60142500	4.21715	4.3242	-	ENSG00000108510.5	MED13	5ss|100||proxintron|12
chr17	60142500	60142613	7.38508	3.77443	-	ENSG00000108510.5	MED13	CDS|67||5utr|46
chr16	89839697	89839767	7.71823	4.01551	-	ENSG00000187741.10	FANCA	CDS|70
chr16	89839767	89839792	5.31891	3.96205	-	ENSG00000187741.10	FANCA	CDS|25
chr3	156869907	156869943	4.56417	4.11183	-	ENSG00000163660.7	CCNL1	5ss|36
chr10	103578122	103578168	3.87305	4.06309	-	ENSG00000198408.9	MGEA5	5utr|46
chr2	232323276	232323313	4.57274	4.37076	-	ENSG00000115053.11	NCL	proxintron|37
chr19	806225	806283	6.05823	5.01081	+	ENSG00000011304.12	PTBP1	proxintron|58
chr3	150263588	150263671	5.31269	5.1439	-	ENSG00000120742.6	SERP1	proxintron|5||3ss|78
chr3	88107738	88107859	7.05406	4.79579	-	ENSG00000163320.6	CGGBP1	proxintron|121
chr4	83346131	83346183	8.24174	3.73731	-	ENSG00000152795.13	HNRNPDL	proxintron|46||3ss|6
chr7	5568357	5568405	9.00388	3.05719	-	ENSG00000075624.9	ACTB	3ss|48
chr17	79657700	79657770	5.90887	4.07828	+	ENSG00000185359.8	HGS	CDS|67||3ss|3
chrX	106359908	106359977	5.16927	3.41156	-	ENSG00000089682.12	RBM41	CDS|69
chr20	2636967	2637007	5.31891	3.98928	+	ENSG00000101361.10	NOP56	3ss|40
chr10	103577865	103577908	13.2897	6.15677	-	ENSG00000198408.9	MGEA5	5utr|43
chr10	103577823	103577865	9.98304	4.73666	-	ENSG00000198408.9	MGEA5	5utr|42
chr1	1326688	1326748	17.8102	4.37487	-	ENSG00000221978.7	CCNL2	proxintron|58||distintron|2
chr1	1326748	1326811	12.4686	3.22565	-	ENSG00000221978.7	CCNL2	distintron|63
chr17	46052168	46052195	6.70786	3.50963	+	ENSG00000108465.10	CDK5RAP3	proxintron|27
chr2	113406660	113406730	5.72906	3.40915	+	ENSG00000144136.6	SLC20A1	distintron|70
chr20	34302105	34302159	13.0034	3.98928	-	ENSG00000131051.16	RBM39	5ss|1||CDS|53
chr1	110554364	110554431	3.48958	3.15428	+	ENSG00000168710.13	AHCYL1	proxintron|67
chr16	242923	242975	3.7815	3.34089	-	ENSG00000007392.12	LUC7L	5ss|2||CDS|50
chr16	1500122	1500195	5.28974	3.10082	-	ENSG00000103249.13	CLCN7	proxintron|73
chr11	14521025	14521125	6.05823	5.56199	-	ENSG00000129083.8	COPB1	5ss|77||proxintron|23
chr17	2239189	2239303	4.89143	3.2199	-	ENSG00000167721.6	TSR1	5ss|73||proxintron|41
chr19	14521126	14521212	3.87305	4.59315	-	ENSG00000123136.10	DDX39A	CDS|21||3ss|65
chr4	100870621	100870680	5.82954	3.84452	-	ENSG00000164032.7	H2AFZ	proxintron|36||3ss|23
chr4	100870680	100870759	6.33387	3.36654	-	ENSG00000164032.7	H2AFZ	5ss|40||proxintron|39
chr2	27258784	27258836	3.53224	3.79698	+	ENSG00000119777.14	TMEM214	3ss|52
chr5	179048083	179048172	38.9549	3.47559	-	ENSG00000169045.13	HNRNPH1	5ss|30||proxintron|5||3ss|54
chr20	49218698	49218754	5.31891	3.80799	-	ENSG00000042062.7	FAM65C	CDS|56
chr17	73775586	73775634	8.03191	3.93157	-	ENSG00000132475.4	H3F3B	5ss|36||5utr|12
chr17	73775549	73775586	6.99144	3.78321	-	ENSG00000132475.4	H3F3B	5ss|37
chr11	57194269	57194336	4.03208	3.16324	-	ENSG00000134802.13	SLC43A3	5ss|67
chr12	9570928	9570999	3.47686	4.51551	-	ENSG00000214826.4	DDX12P	noncoding_exon|71
chr6	158364710	158364775	4.56417	3.57828	+	ENSG00000130340.10	SNX9	3utr|65
chr6	35437838	35437854	4.96253	3.83756	+	MI0022962	hsa-mir-7111	miRNA_proximal|16
chr7	5569977	5570044	25.9071	7.16672	-	ENSG00000075624.9	ACTB	proxintron|67
chr14	70234180	70234212	4.07023	3.26988	+	ENSG00000100650.11	SRSF5	5ss|18||proxintron|14
chr3	50137777	50137858	5.61991	4.28337	+	ENSG00000003756.12	RBM5	3utr|81
chr1	245026499	245026502	6.33376	4.38563	-	ENSG00000153187.12	HNRNPU	proxintron|3
chr19	54972191	54972242	57.2061	4.21501	+	ENSG00000167615.12	LENG8	3utr|51
chr19	54972242	54972269	13.9301	3.53129	+	ENSG00000167615.12	LENG8	3utr|27
chr19	54972170	54972185	14.623	3.47782	+	ENSG00000167615.12	LENG8	3utr|15
chr16	2807509	2807581	13.1907	3.24009	+	ENSG00000167978.12	SRRM2	CDS|72
chr19	6421578	6421616	3.19517	3.62804	-	ENSG00000088247.11	KHSRP	5ss|38
chr15	72150975	72151003	6.33376	4.35557	+	ENSG00000200873.1	RNA5SP399	noncoding_exon|28
chr7	5569549	5569604	13.4984	5.52147	-	ENSG00000075624.9	ACTB	5utr|55
chr2	145274711	145274784	8.6984	5.18114	-	ENSG00000169554.12	ZEB2	5ss|40||proxintron|33
chr4	74123751	74123819	5.31269	4.85921	-	ENSG00000132466.13	ANKRD17	proxintron|68
chr9	139357619	139357746	3.43083	3.25956	-	ENSG00000148396.14	SEC16A	proxintron|61||3ss|66
chr11	85375313	85375362	5.02584	3.95572	-	ENSG00000137504.9	CREBZF	CDS|49
chr10	6154416	6154484	5.59237	3.16324	+	ENSG00000134453.11	RBM17	proxintron|59||CDS|9
chr12	57000412	57000464	3.87305	3.71478	-	ENSG00000076108.7	BAZ2A	5ss|4||CDS|48
chrX	153579234	153579261	5.31269	5.33556	-	ENSG00000196924.10	FLNA	5ss|27
chr16	85690092	85690151	5.82954	3.1746	+	ENSG00000131149.13	GSE1	CDS|59
chr7	100283850	100283953	15.0623	3.25224	-	ENSG00000146830.9	GIGYF1	CDS|103
chr17	46052986	46053086	10.6097	3.20485	+	ENSG00000108465.10	CDK5RAP3	5ss|66||CDS|34
chr19	7992753	7992839	4.20532	4.83706	-	ENSG00000104980.3	TIMM44	proxintron|86
chr7	152132886	152133036	8.41397	3.55537	-	ENSG00000055609.13	KMT2C	5utr|150
chr7	100284374	100284427	5.06028	3.13601	-	ENSG00000146830.9	GIGYF1	CDS|53
chr2	61720843	61720865	3.19517	3.96708	-	ENSG00000082898.12	XPO1	proxintron|22
chr22	39713403	39713469	6.21783	4.96583	-	ENSG00000100316.11	RPL3	5ss|62||CDS|4
chr17	26941129	26941201	8.02671	3.64781	-	ENSG00000258472.4||ENSG00000167524.10	SGK494|RP11-192H23.4	CDS|51||5utr|21
chr6	79787419	79787448	3.87305	3.76289	-	ENSG00000146247.13	PHIP	CDS|28||3ss|1
chr4	103748694	103748742	3.73046	3.27607	-	ENSG00000109332.15	UBE2D3	5utr|48
chr1	19464617	19464676	9.5004	4.02687	-	ENSG00000127481.10	UBR4	CDS|59
chr8	145691570	145691617	3.47686	4.06528	+	ENSG00000167702.7	KIFC2	5utr|47
chr7	158448331	158448409	13.4762	5.9354	-	ENSG00000146918.15	NCAPG2	proxintron|78
chr8	38877351	38877434	4.96253	3.61728	+	ENSG00000168615.7	ADAM9	distintron|83
chrX	41203272	41203318	4.96253	3.52584	+	ENSG00000215301.5	DDX3X	CDS|36||3ss|10
chr14	21737231	21737339	19.4442	4.91725	-	ENSG00000092199.13	HNRNPC	proxintron|108
chr4	174255062	174255096	6.43275	5.56034	-	ENSG00000164104.7	HMGB2	5ss|2||proxintron|32
chr4	174255096	174255149	4.23918	3.51813	-	ENSG00000164104.7	HMGB2	5ss|53
chr15	91523522	91523566	3.19517	3.79856	-	ENSG00000198901.9	PRC1	CDS|44
chr19	10227404	10227471	5.31269	4.61183	-	ENSG00000130811.6	EIF3G	5ss|67
chr16	21531552	21531649	8.0694	3.58149	-	ENSG00000180747.11||ENSG00000258186.2	SLC7A5P2|CTD-2547E10.2	noncoding_exon|97
chr10	70515521	70515576	8.29154	3.98576	+	ENSG00000060339.9	CCAR1	proxintron|55
chr16	29810040	29810096	4.21715	3.65749	+	ENSG00000079616.8	KIF22	5ss|27||CDS|29
chr16	30094517	30094597	3.47686	4.48928	+	ENSG00000149923.9	PPP4C	proxintron|80
chr4	1741112	1741186	4.53894	3.08239	+	ENSG00000218422.2	AC016773.1	noncoding_exon|74
chr22	22049398	22049475	9.44	4.16957	+	ENSG00000100023.13	PPIL2	5ss|62||proxintron|15
chr15	75651843	75651910	5.31269	4.61183	-	ENSG00000140400.10	MAN2C1	5ss|47||3ss|20
chr10	5496604	5496627	4.20532	4.3173	+	ENSG00000173848.14	NET1	proxintron|23
chr11	47753291	47753359	7.46649	3.03704	-	ENSG00000109920.8	FNBP4	proxintron|68
chr1	21083695	21083745	18.7294	3.24168	-	ENSG00000127483.13	HP1BP3	CDS|50
chr1	21083745	21083749	11.8011	3.13634	-	ENSG00000127483.13	HP1BP3	CDS|4
chr22	20114362	20114427	6.98881	3.1376	+	ENSG00000099901.12	RANBP1	3utr|65
chr5	179050210	179050247	12.0335	4.68578	-	ENSG00000169045.13	HNRNPH1	5utr|37
chr22	39916805	39916878	6.03582	3.25792	+	ENSG00000128272.10	ATF4	5utr|73
chr20	57564255	57564352	10.5227	3.24254	+	ENSG00000101158.8	NELFCD	proxintron|97
chrX	102470178	102470252	4.91381	4.37929	+	ENSG00000102409.9	BEX4	5ss|74
chr16	278885	278944	7.71823	3.96205	-	ENSG00000007392.12	LUC7L	proxintron|59
chr2	38977756	38977836	7.02132	4.02276	-	ENSG00000115875.14	SRSF7	proxintron|80
chr21	47850493	47850556	4.61518	3.22303	+	ENSG00000160299.12	PCNT	CDS|63
chr11	499296	499399	5.31269	4.98684	-	ENSG00000023191.12	RNH1	proxintron|103
chr10	21823564	21823609	5.64001	3.39699	+	ENSG00000078403.12	MLLT10	CDS|36||3ss|9
chr1	151373440	151373498	4.07023	3.26988	+	ENSG00000159377.6	PSMB4	proxintron|58
chr19	54971646	54971677	13.3417	3.95087	+	ENSG00000167615.12	LENG8	3utr|31
chr11	118355626	118355711	3.87305	3.63601	+	ENSG00000118058.16	KMT2A	5ss|20||CDS|65
chr19	19101927	19101963	4.44165	5.10462	-	ENSG00000064607.12	SUGP2	3utr|32||3ss|4
chr14	21736978	21737067	10.5635	3.4474	-	ENSG00000092199.13	HNRNPC	proxintron|89
chr1	12089444	12089578	4.28456	3.02821	+	MI0022574	hsa-mir-6729	miRNA_proximal|134
chr12	62954426	62954477	3.19578	3.30556	+	ENSG00000061987.10	MON2	CDS|51
chr19	56166312	56166382	3.48958	3.65428	+	ENSG00000063244.8	U2AF2	5utr|70
chrX	70775039	70775106	18.8244	3.09082	+	ENSG00000147162.9	OGT	CDS|67
chr11	70279214	70279294	4.89143	3.32072	+	ENSG00000085733.11	CTTN	CDS|80
chr7	127031691	127031773	3.83993	4.79856	-	ENSG00000048405.5	ZNF800	proxintron|3||3ss|79
chr3	9476217	9476246	5.30001	3.78005	+	ENSG00000168137.11	SETD5	5ss|29
chr15	91455755	91455834	9.3769	3.70698	+	ENSG00000196547.10	MAN2A2	CDS|63||3ss|16
chr15	50867154	50867217	7.18475	5.05537	-	ENSG00000092439.9	TRPM7	CDS|63
chr14	39644663	39644703	5.68483	4.71833	+	ENSG00000100941.4	PNN	5ss|34||proxintron|6
chr5	179248854	179248908	3.19517	4.45953	+	ENSG00000161011.15	SQSTM1	distintron|54
chr7	100283595	100283661	8.24174	3.38121	-	ENSG00000146830.9	GIGYF1	5ss|1||CDS|65
chr22	39713106	39713159	5.03432	4.63004	-	ENSG00000100316.11	RPL3	proxintron|53
chr12	133363009	133363117	3.53224	3.73234	-	ENSG00000090615.8	GOLGA3	CDS|108
chr7	2406360	2406425	5.98231	4.19679	+	ENSG00000106263.13	EIF3B	proxintron|65
chr17	74732569	74732619	7.56206	5.51551	-	MI0003651	hsa-mir-636	miRNA|50
chr16	1502469	1502597	9.18609	3.81681	-	ENSG00000103249.13	CLCN7	proxintron|128
chr5	179049337	179049419	14.8462	3.33181	-	ENSG00000169045.13	HNRNPH1	distintron|82
chr21	47982563	47982627	5.06028	3.02482	+	ENSG00000160305.13	DIP2A	distintron|64
chr10	21884258	21884290	4.56417	3.88212	+	ENSG00000078403.12	MLLT10	CDS|31||3ss|1
chr16	2809718	2809757	9.79566	3.10047	+	ENSG00000167978.12	SRRM2	5ss|39
chr2	27246846	27246897	4.21715	3.62804	+	ENSG00000084764.6	MAPRE3	proxintron|17||3ss|34
chr22	22025131	22025211	14.0808	4.18815	+	ENSG00000100023.13	PPIL2	proxintron|54||3ss|26
chr10	70515333	70515385	13.4354	3.55693	+	ENSG00000060339.9	CCAR1	5ss|52
chr10	70515385	70515417	6.3712	3.22565	+	ENSG00000060339.9	CCAR1	5ss|9||proxintron|23
chr22	20100790	20100825	4.94193	4.56528	-	ENSG00000099899.10	TRMT2A	3ss|35
chr17	74392335	74392448	4.21715	3.78901	-	ENSG00000175931.8	UBE2O	CDS|113
chr16	85695865	85695928	6.32673	3.83623	+	ENSG00000131149.13	GSE1	proxintron|7||distintron|56
chrX	13330586	13330656	11.9943	3.29574	+	lncRNA|LINC01203||ENSG00000231216.1	LINC01203|GS1-600G8.3	noncoding_exon|70
chr12	56436883	56436948	4.21715	3.83556	+	ENSG00000197728.5	RPS26	proxintron|65
chr15	91456633	91456661	4.96253	3.56382	+	ENSG00000196547.10	MAN2A2	5ss|24||CDS|4
