# Supplementary material for: RBM17 Mediates Evasion of Pro-Leukemic Factors from Splicing-coupled NMD to Enforce Leukemic Stem Cell Maintenance
Source: Research Square preprint supplement (doi:10.21203/rs.3.rs-728533/v1), 2021-07-27
Supplement: Supplementary file 11 [file b149424de16a47e70e9ab374.xlsx]

## Sheet: Sheet1
sample#	AML#	Gender	Diagnosis	Age at Dx	Cytogenetics	FAB subtype	Additional molecular markers
001	090191	Male	De novo	32.7	46,XY,ider(7)(q10)del(7)(q21)[20]	M1	not done
002	16406	Male	De novo	NA	NA	M5	NA
003	090501	Male	MDS, refractory cytopenia with multilineage dysplasia	64	47,XY,+8[2]/46,XY[20].	NA	not done
004	0285	Female	AML, sub-type unclassified	52	47,XX,+8[14]	NA	FLT3-ITD
005	0840	Male	De novo	78	46, XY[20]	M1	NA
006	0596	Male	De novo	64	46, XY[21]	M1	FLT3-ITD
007	120150	Male	De novo	81.5	46, XY[20]	M1	not done
008	80043	Male	De novo	27	47, XY[20]	M0	not done
